# Supplementary material for: Combined Inhibition of AKT and KIT Restores Expression of Programmed Cell Death 4 (PDCD4) in Gastrointestinal Stromal Tumor
Source: MDPI journal article supplement (doi:10.3390/cancers13153699), 2021-07-23

Supplementary data file S3: Immunoblots with molecular weight markers and densitometry

Figure 2

Samples' naming:

- 1 – GIST-T1 Veh

2 – GIST-T1 IM

3 – GIST-T1 MK-4440

4 – GIST-T1 Comb.

5 – GIST-T1/829 Veh

6 – GIST-T1/829 IM

7 – GIST-T1/829 MK-4440

8 – GIST-T1/829 Comb.
- 9 – GIST 430 Veh

10 – GIST 430 IM

11 – GIST 430 MK-4440

12 – GIST 430 Comb.

Marker's size map:  
Sizes used for MOPS buffer

| Protein                | Approximate Molecular Weights (kDa) |        |                         |                          |                                  |
|------------------------|-------------------------------------|--------|-------------------------|--------------------------|----------------------------------|
|                        | Tris-Glycine                        | Ticine | NuPAGE <sup>®</sup> MES | NuPAGE <sup>®</sup> MOPS | NuPAGE <sup>®</sup> Tris-Acetate |
| Myosin                 | 250                                 | 210    | 198                     | 191                      | 210                              |
| Phosphorylase          | 148                                 | 105    | 98                      | 97                       | 111                              |
| BSA                    | 98                                  | 78     | 62                      | 64                       | 71                               |
| Glutamic Dehydrogenase | 64                                  | 55     | 49                      | 51                       | 55                               |
| Alcohol Dehydrogenase  | 50                                  | 45     | 38                      | 39                       | 41                               |
| Carbonic Anhydrase     | 36                                  | 34     | 28                      | 28                       | n/a                              |
| Myoglobin Red          | 22                                  | 17     | 17                      | 19                       | n/a                              |
| Lysozyme               | 16                                  | 16     | 14                      | 14                       | n/a                              |
| Aprotinin              | 6                                   | 7      | 6                       | n/a                      | n/a                              |
| Insulin, B Chain       | 4                                   | 4      | 3                       | n/a                      | n/a                              |

NuPAGE<sup>®</sup> Novex Bis-Tris 4-12% Gel

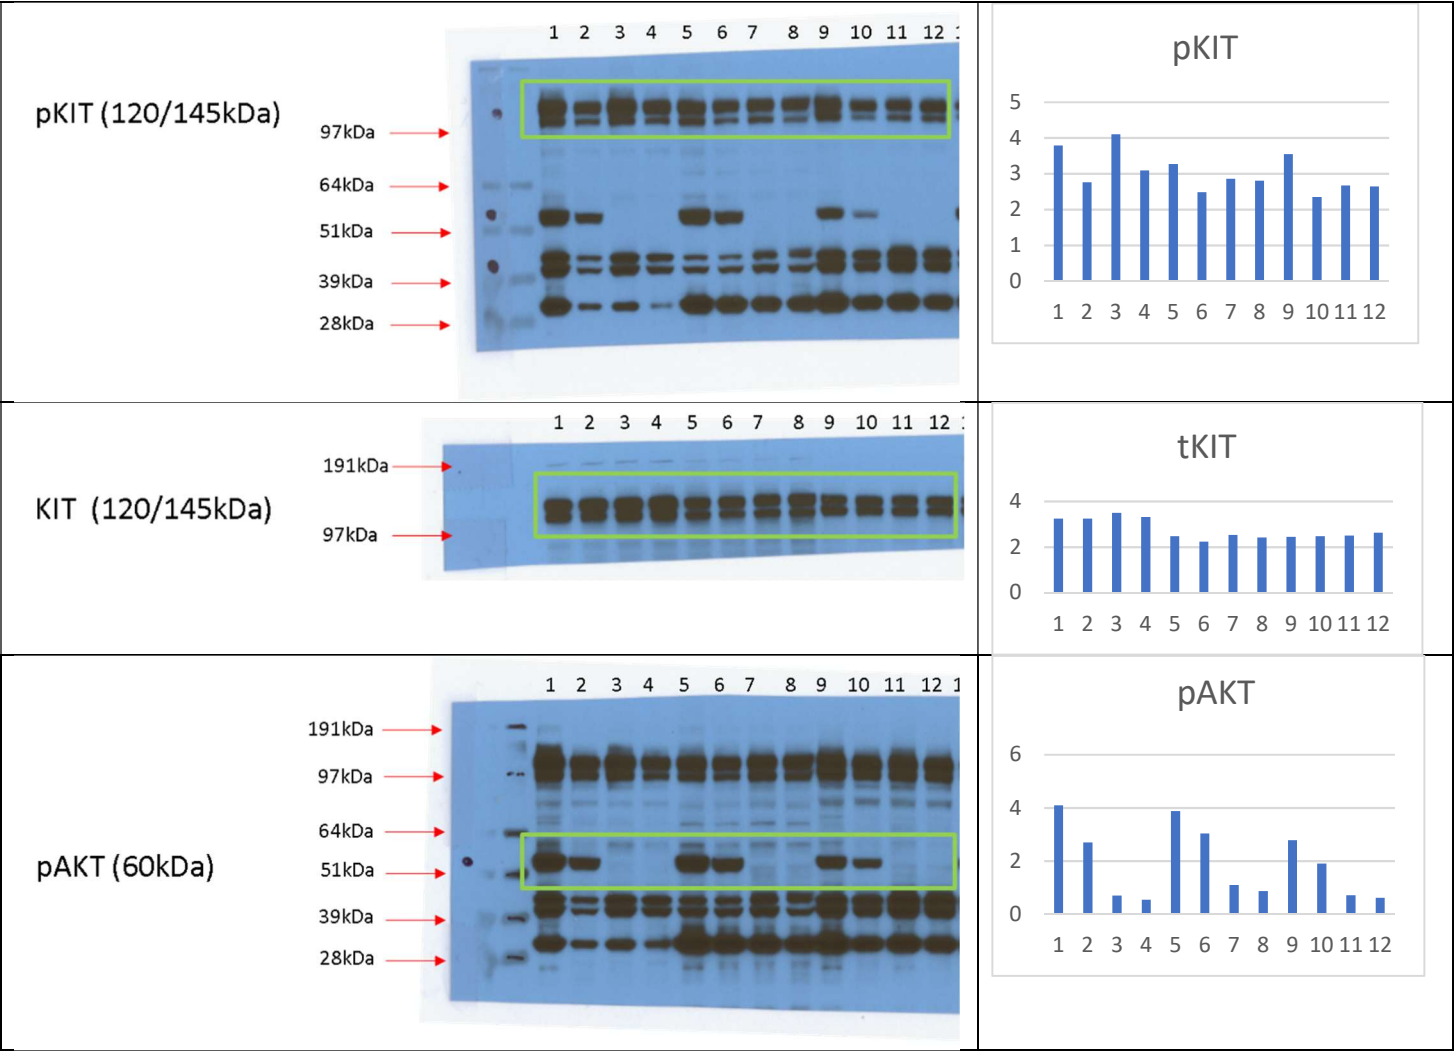

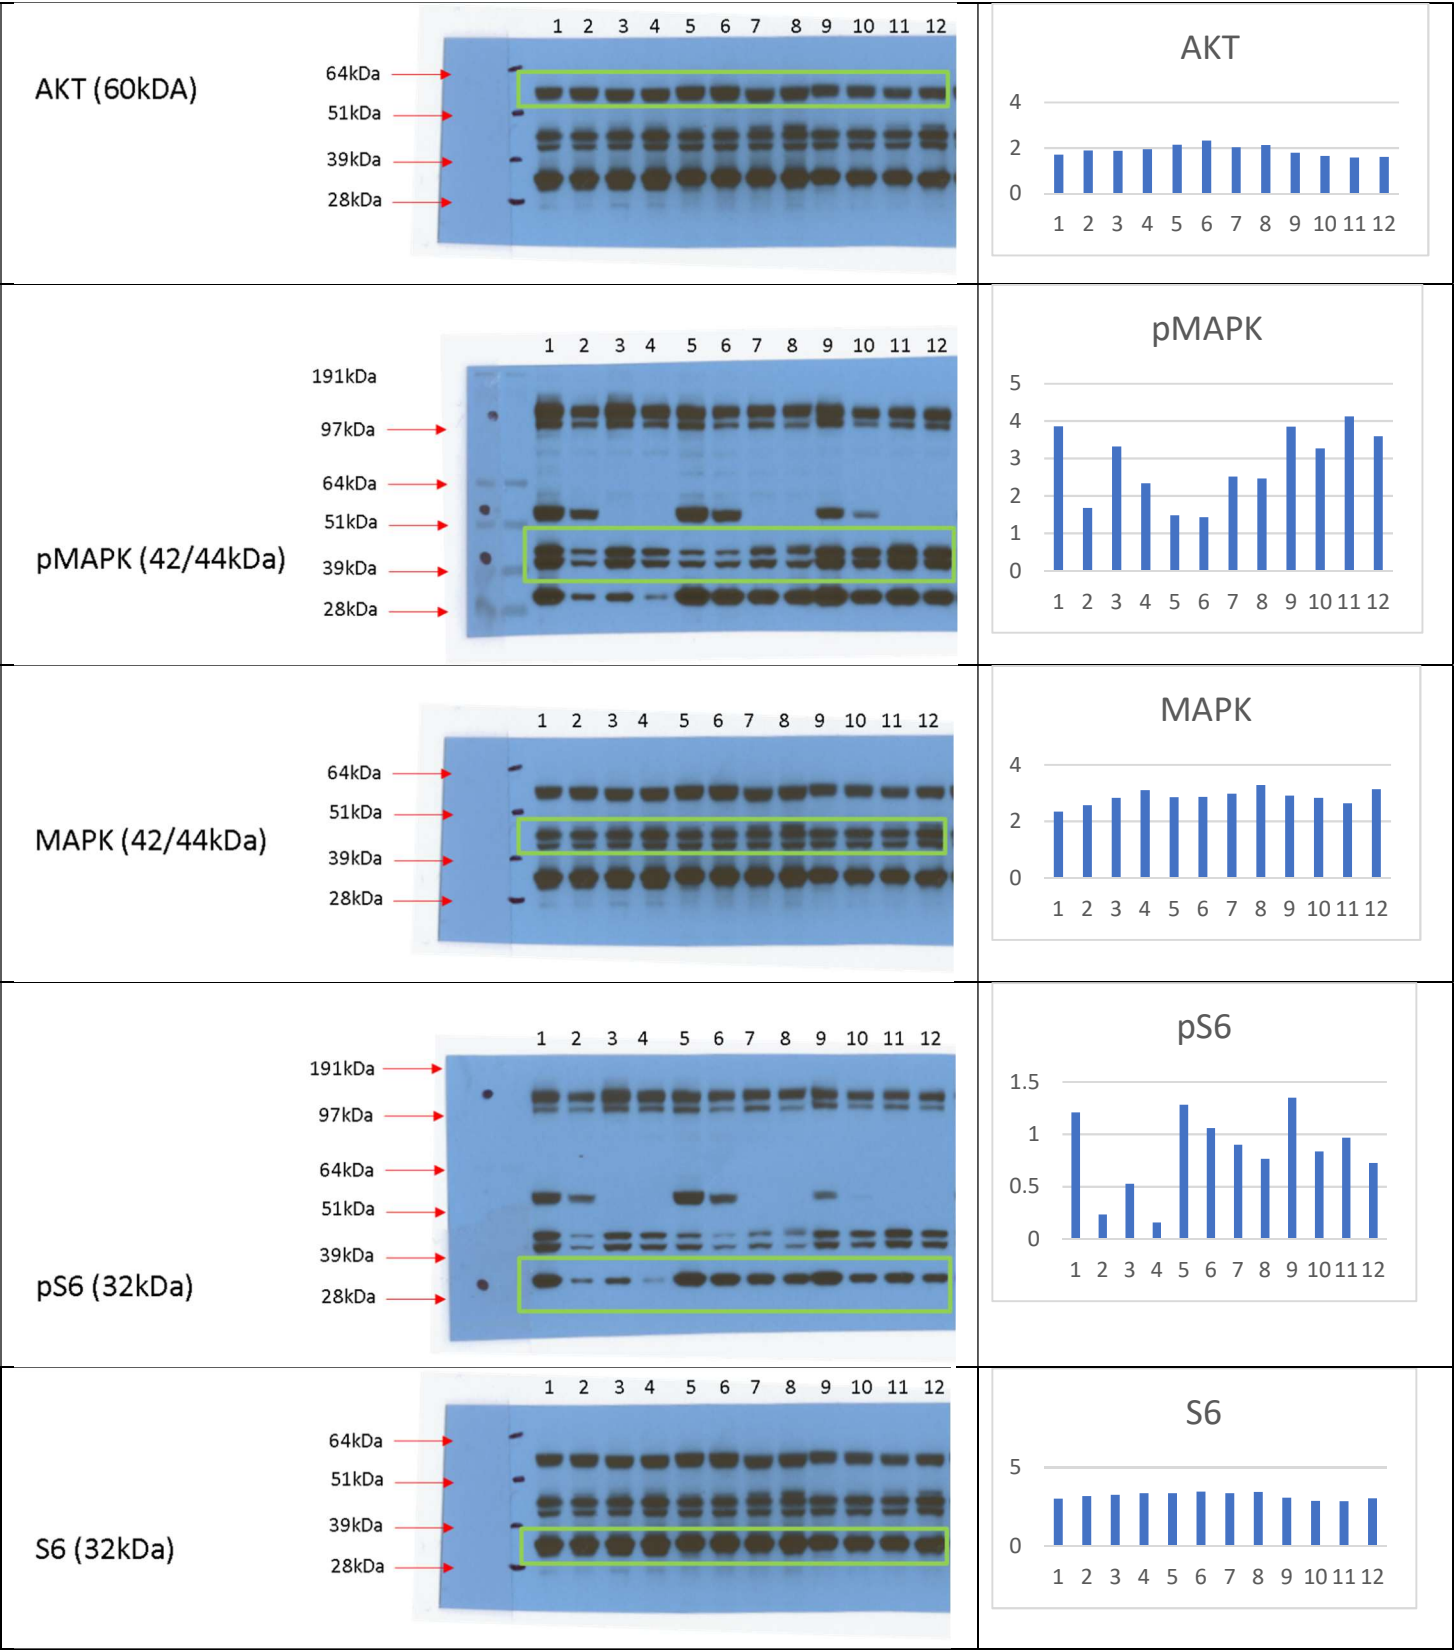

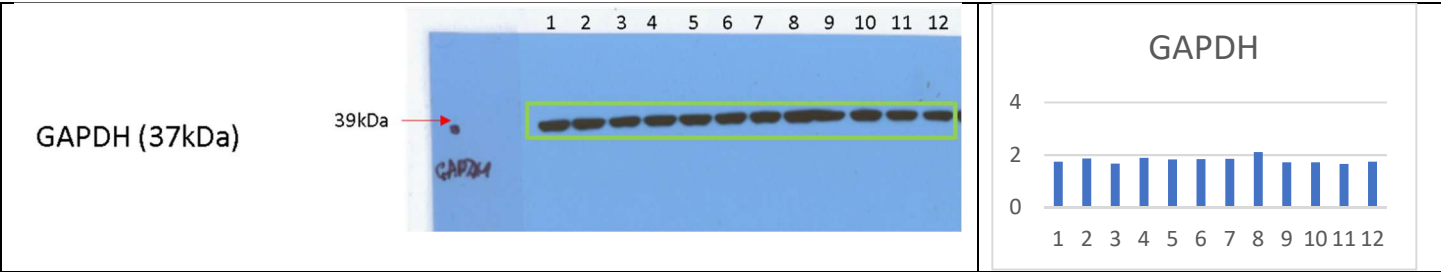

Figure 4

Samples' naming:

- 1 – GIST-T1 Veh

2 – GIST-T1 IM

3 – GIST-T1 MK-4440

4 – GIST-T1 Comb.

5 – GIST-T1/829 Veh

6 – GIST-T1/829 IM

7 – GIST-T1/829 MK-4440

8 – GIST-T1/829 Comb.
- 9 – GIST 430 Veh

10 – GIST 430 IM

11 – GIST 430 MK-4440

12 – GIST 430 Comb.

Marker's size map:

Sizes used for MOPS buffer

| Protein                | Approximate Molecular Weights (kDa) |         |             |              |                      |
|------------------------|-------------------------------------|---------|-------------|--------------|----------------------|
|                        | Tris-Glycine                        | Tricine | NuPAGE® MES | NuPAGE® MOPS | NuPAGE® Tris-Acetate |
| Myosin                 | 250                                 | 210     | 198         | 191          | 210                  |
| Phosphorylase          | 148                                 | 105     | 98          | 97           | 111                  |
| BSA                    | 98                                  | 78      | 62          | 64           | 71                   |
| Glutamic Dehydrogenase | 64                                  | 55      | 49          | 51           | 55                   |
| Alcohol Dehydrogenase  | 50                                  | 45      | 38          | 39           | 41                   |
| Carbonic Anhydrase     | 36                                  | 34      | 28          | 28           | n/a                  |
| Myoglobin Red          | 22                                  | 17      | 17          | 19           | n/a                  |
| Lysozyme               | 16                                  | 16      | 14          | 14           | n/a                  |
| Aprotinin              | 6                                   | 7       | 6           | n/a          | n/a                  |
| Insulin, B Chain       | 4                                   | 4       | 3           | n/a          | n/a                  |

NuPAGE® Novex  
Bis-Tris 4-12% Gel

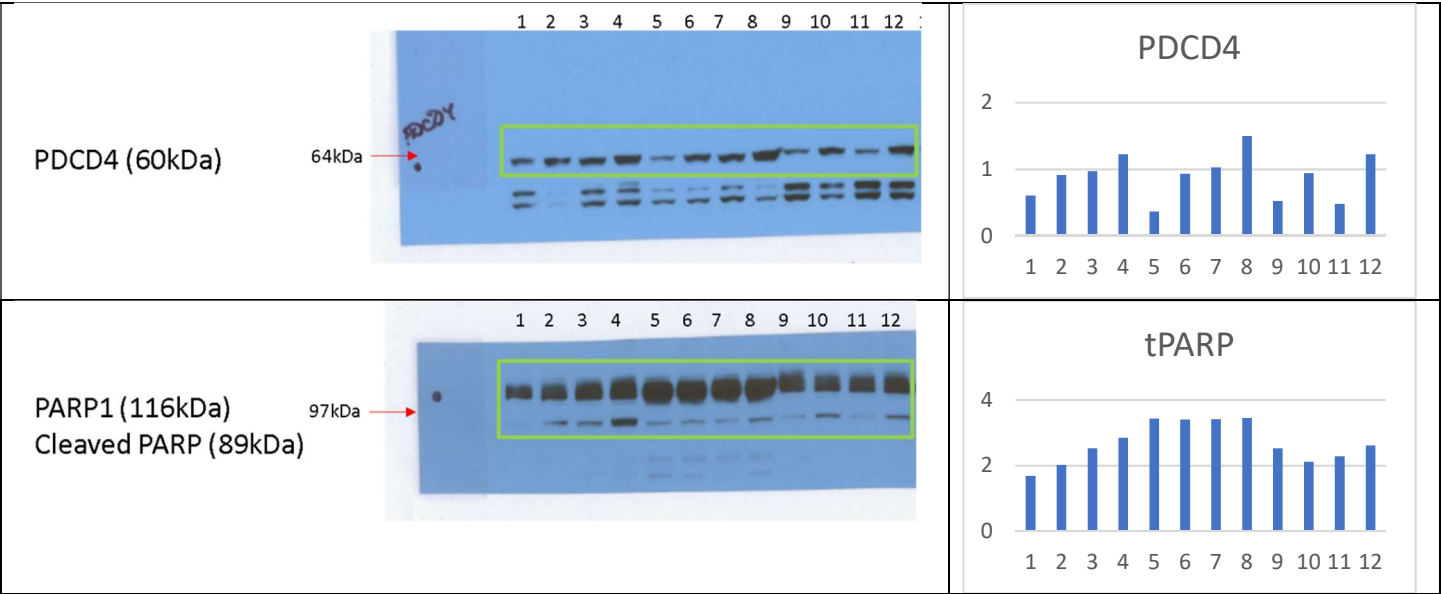

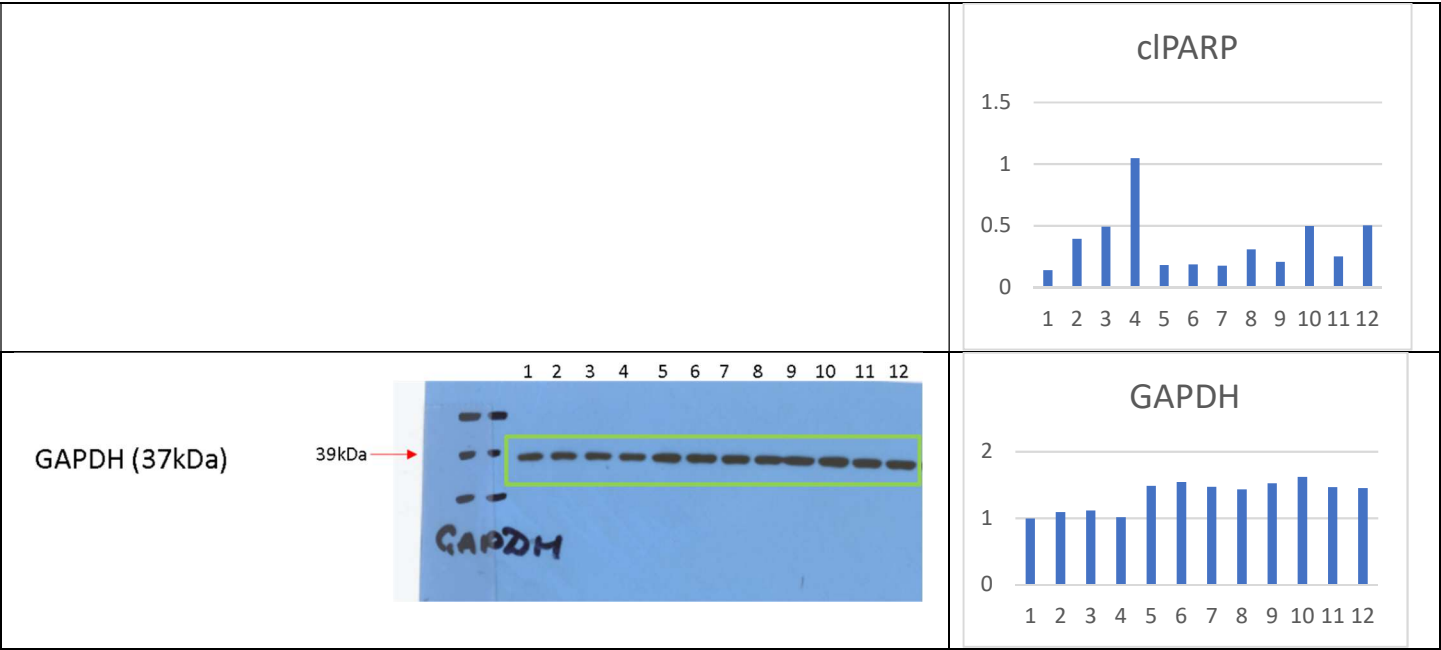

Supplementary Figure 1

Samples' naming:

- 1 – GIST-T1 Control
- 2 – GIST-T1 PDCD4 overexpression
- 3 – GIST430 Control
- 4 – GIST430 PDCD4 overexpression
- 5 – GIST-T1/829 Control
- 6 – GIST-T1/829 PDCD4 overexpression

Marker's size map:

Sizes used for MOPS buffer

| Protein                | Approximate Molecular Weights (kDa) |         |                         |                          |                                  |
|------------------------|-------------------------------------|---------|-------------------------|--------------------------|----------------------------------|
|                        | Tris-Glycine                        | Tricine | NuPAGE <sup>®</sup> MES | NuPAGE <sup>®</sup> MOPS | NuPAGE <sup>®</sup> Tris-Acetate |
| Myosin                 | 250                                 | 210     | 198                     | 191                      | 210                              |
| Phosphorylase          | 148                                 | 105     | 98                      | 97                       | 111                              |
| BSA                    | 98                                  | 78      | 62                      | 64                       | 71                               |
| Glutamic Dehydrogenase | 64                                  | 55      | 49                      | 51                       | 55                               |
| Alcohol Dehydrogenase  | 50                                  | 45      | 38                      | 39                       | 41                               |
| Carbonic Anhydrase     | 36                                  | 34      | 28                      | 28                       | n/a                              |
| Myoglobin Red          | 22                                  | 17      | 17                      | 19                       | n/a                              |
| Lysozyme               | 16                                  | 16      | 14                      | 14                       | n/a                              |
| Aprotinin              | 6                                   | 7       | 6                       | n/a                      | n/a                              |
| Insulin, B Chain       | 4                                   | 4       | 3                       | n/a                      | n/a                              |

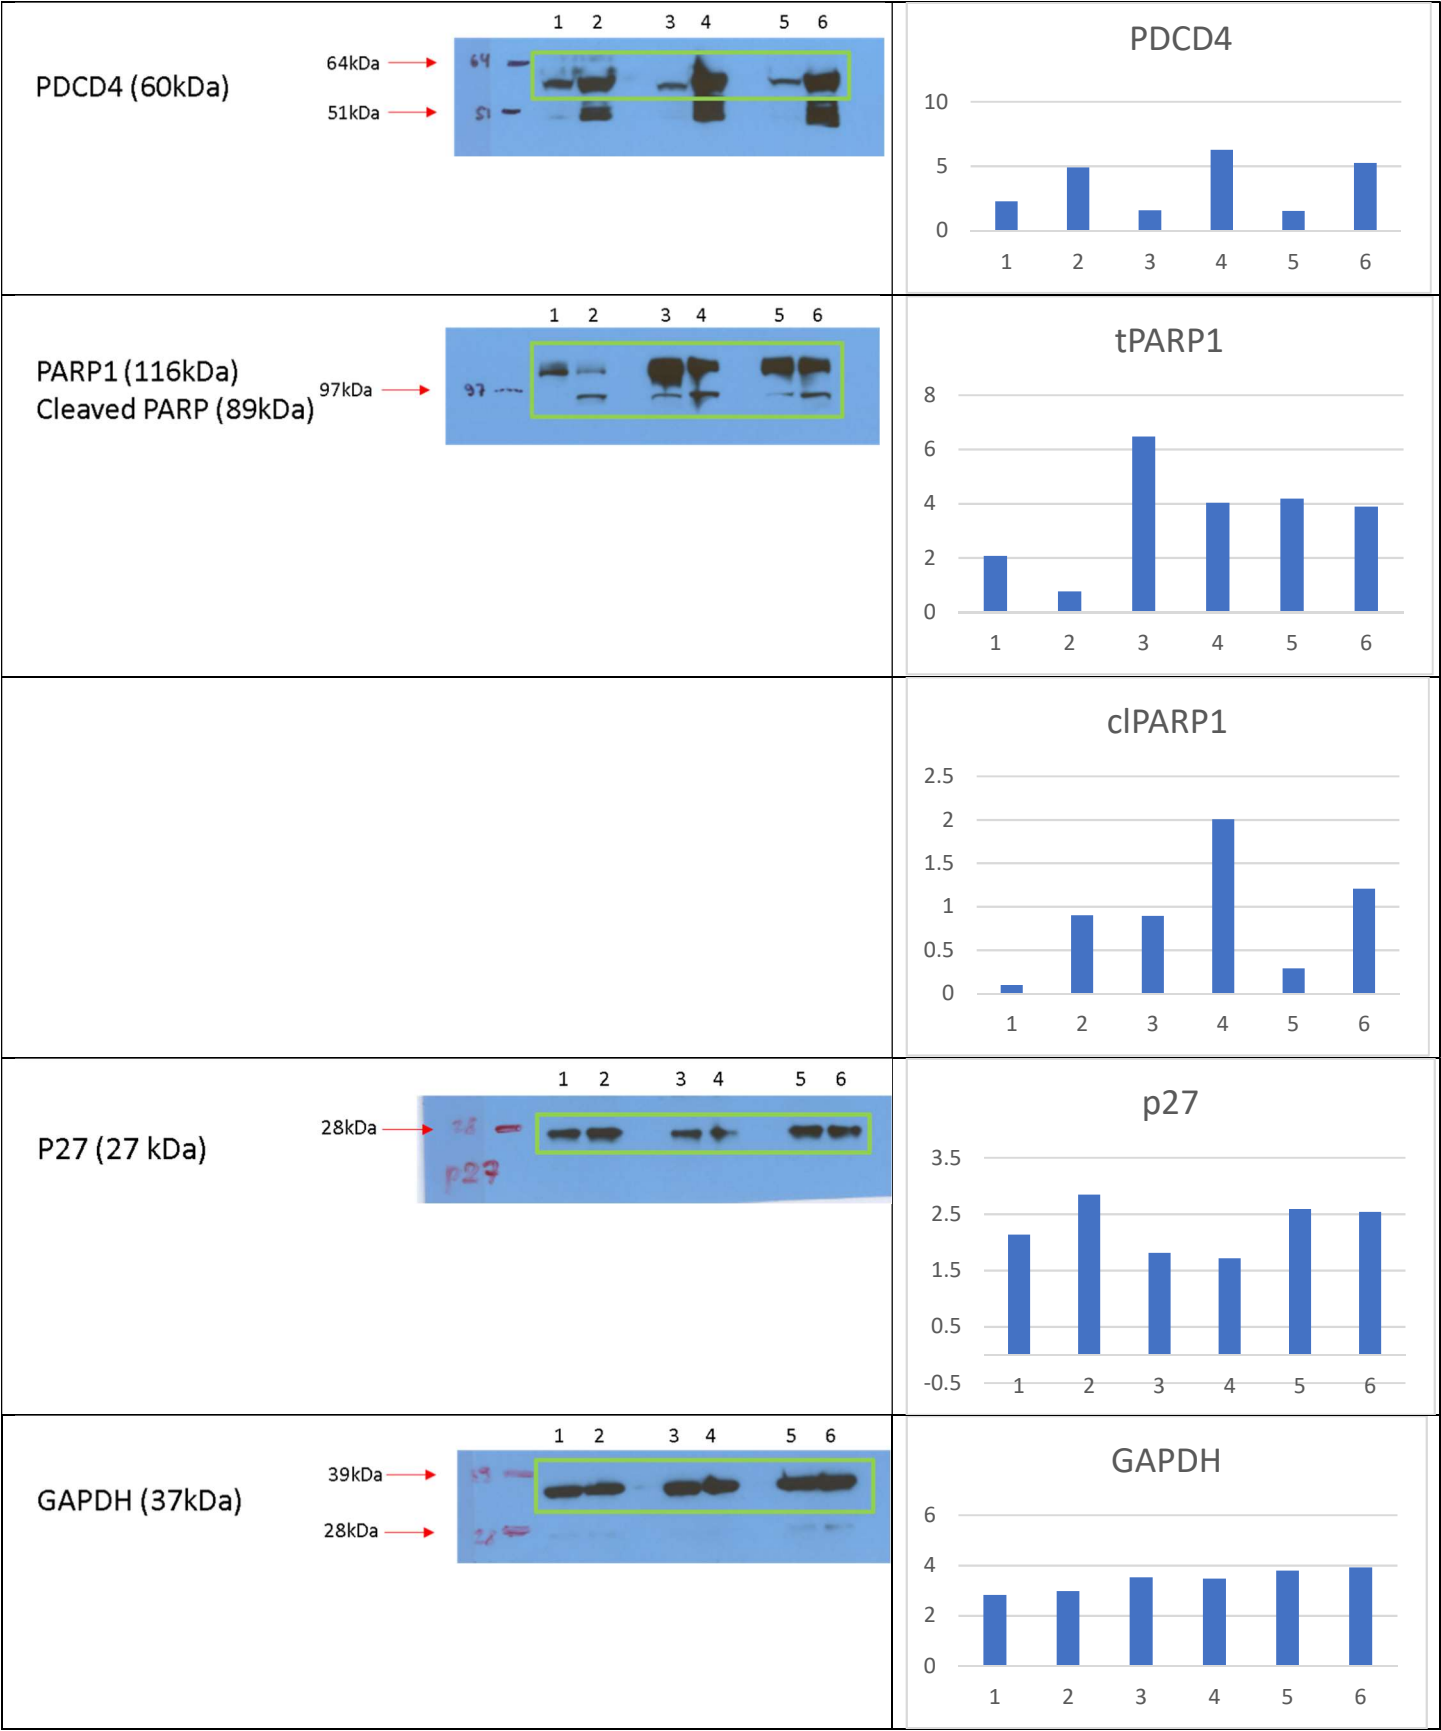

Supplementary Figure 2

Samples' naming:

- 1 – GIST-T1 Veh

2 – GIST-T1 Ripretinib

3 – GIST-T1 MK-4440

4 – GIST-T1 Comb.

5 – GIST-T1/829 Veh

6 – GIST-T1/829 Ripretinib

7 – GIST-T1/829 MK-4440

8 – GIST-T1/829 Comb.
- 9 – GIST 430 Veh

10 – GIST 430 Ripretinib

11 – GIST 430 MK-4440

12 – GIST 430 Comb.

Marker's size map:

Sizes used for MOPS buffer

| Protein                | Approximate Molecular Weights (kDa) |         |             |              |                      |
|------------------------|-------------------------------------|---------|-------------|--------------|----------------------|
|                        | Tris-Glycine                        | Tricine | NuPAGE® MES | NuPAGE® MOPS | NuPAGE® Tris-Acetate |
| Myosin                 | 250                                 | 210     | 198         | 191          | 210                  |
| Phosphorylase          | 148                                 | 105     | 98          | 97           | 111                  |
| BSA                    | 98                                  | 78      | 62          | 64           | 71                   |
| Glutamic Dehydrogenase | 64                                  | 55      | 49          | 51           | 55                   |
| Alcohol Dehydrogenase  | 50                                  | 45      | 38          | 39           | 41                   |
| Carbonic Anhydrase     | 36                                  | 34      | 28          | 28           | n/a                  |
| Myoglobin Red          | 22                                  | 17      | 17          | 19           | n/a                  |
| Lysozyme               | 16                                  | 16      | 14          | 14           | n/a                  |
| Aprotinin              | 6                                   | 7       | 6           | n/a          | n/a                  |
| Insulin, B Chain       | 4                                   | 4       | 3           | n/a          | n/a                  |

NuPAGE® Novex Bis-Tris 4-12% Gel

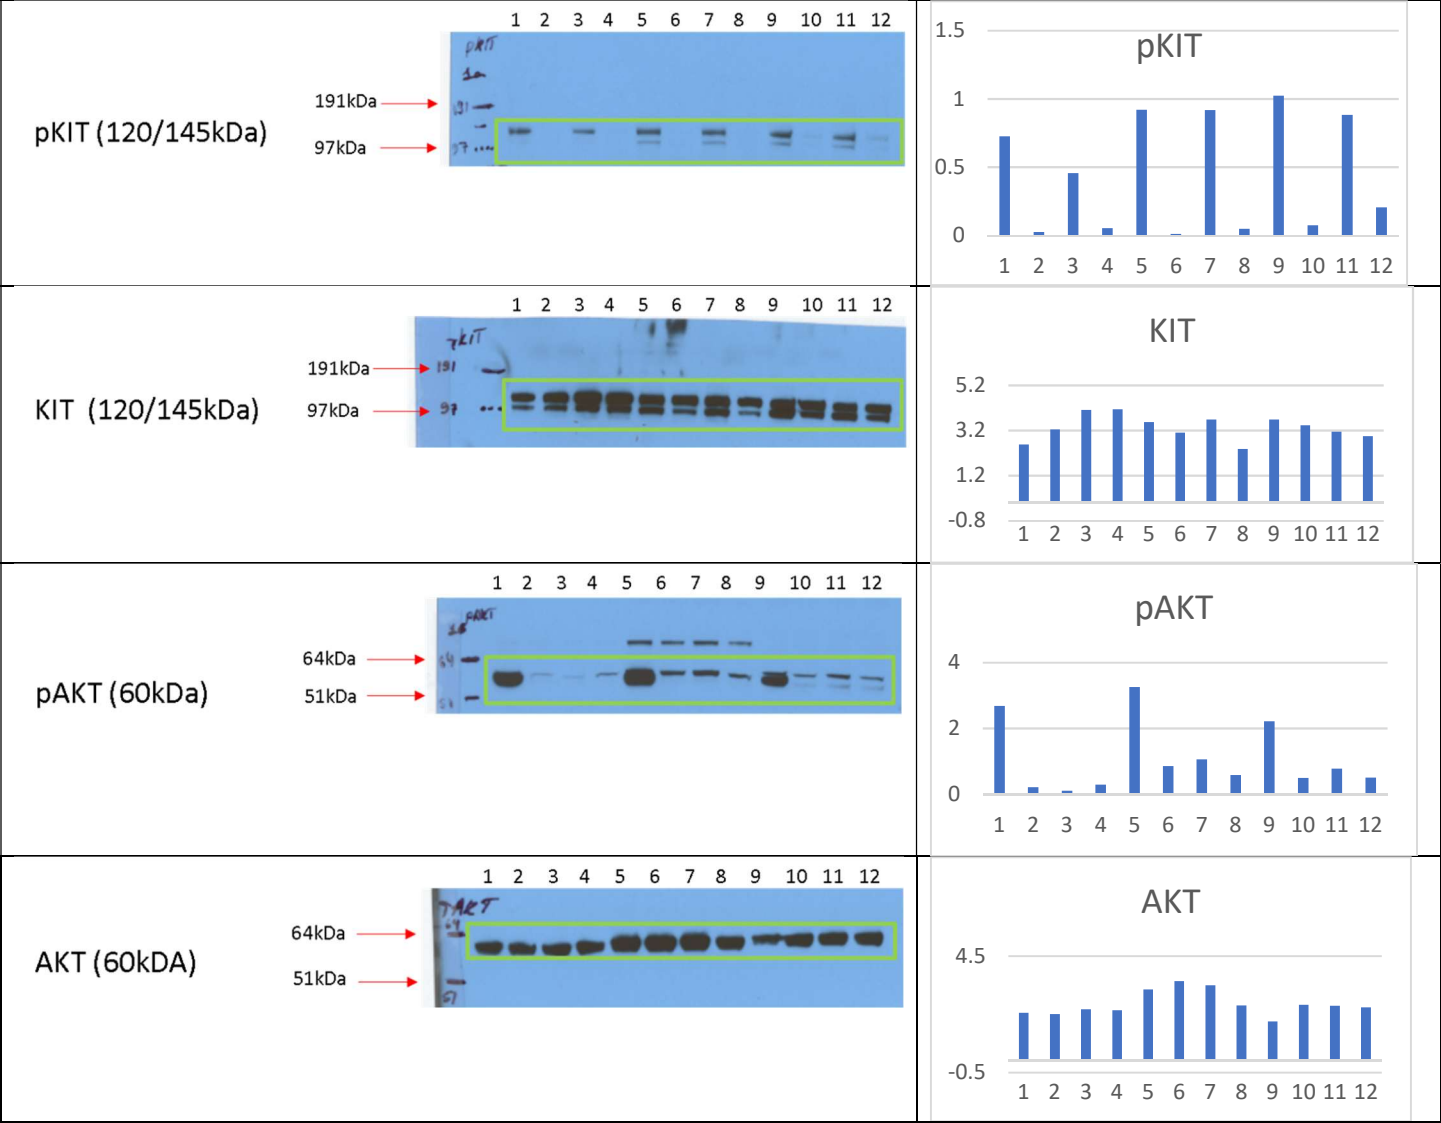

Supplement: s1 [file s1]
