# Supplementary material for: Combined Inhibition of AKT and KIT Restores Expression of Programmed Cell Death 4 (PDCD4) in Gastrointestinal Stromal Tumor
Source: Cancers (Basel). 2021 Jul 23;13(15):3699. doi: 10.3390/cancers13153699 (PMC8345102; doi:10.3390/cancers13153699)
Supplement: Supplementary file 1 [file cancers-13-03699-s001.zip]

Archive with 5 entries (5 files):
- Cancers-2021-PDCD4_in_GIST-Kozinova et al_Supplementary_figures_1_and_2.pdf
- Data file S1.xlsx
- Data file S2.xlsx
- Data file S3.pdf
- Supplementary methods S1.pdf
