# Supplementary material for: Combined Inhibition of AKT and KIT Restores Expression of Programmed Cell Death 4 (PDCD4) in Gastrointestinal Stromal Tumor
Source: Cancers (Basel). 2021 Jul 23;13(15):3699. doi: 10.3390/cancers13153699 (PMC8345102; doi:10.3390/cancers13153699)
Supplement: Supplementary file 1 [file cancers-13-03699-s001.zip › Data file S1.xlsx]

## Sheet: Sheet1
Combined Inhibition of AKT and KIT Restores Expression of Programmed Cell Death 4 (PDCD4) in Gastrointestinal Stromal Tumor
Marya Kozinova, Shalina Joshi, Shuai Ye, Martin G. Belinsky, Dinara Sharipova, Jeffrey M. Farma, Sanjay Reddy, Samuel Litwin, Karthik Devarajan, Alex Rosa Campos, Yi Yu, Brian Schwartz, Margaret von Mehren, and Lori Rink
Data file S1. Defining proteins abundance amongst IM&MK-4440 treated and paired untreated GIST cell lines lysates identified using LC-MS/MS analysis
Table relates to the section Protein Extraction and LC-MS/MS Analysis.
GIST cell lines were treated for 20 hours with IM/MK-4440 combination at the following concentrations, 40nM/120nM (GIST-T), 1uM/3uM (GIST-T1/829) or corresponding amount of DMSO (control) in three biological replicates (R1, R2, R3).
Raw MS data was analyzed in MaxQuant and searched against the curated (Swiss-Prot) Homo sapiens Uniprot protein sequence database and GPM cRAP sequences (commonly known protein contaminants).
The MaxQuant output file was imported and susequently analyzed in Perseus
Label-free quantitation intensity (LFQ) values were log2 transformed; NaN represents missing values
Supplementary Data File S1: Defining proteins abundance amongst IM&MK-4440 treated and paired untreated GIST cell lines lysates identified using LC-MS/MS analysis
Majority protein IDs	Protein names	Gene names	Peptides	Unique peptides	Sequence coverage [%]	Mol. weight [kDa]	Score	C: Only identified by site	C: Potential contaminant	Log2(LFQ intensity)						Log2(LFQ intensity)
										GIST-T1/829-R1	GIST-T1/829-R2	GIST-T1/829-R3	GIST-T1/829-20h-IM/MK-4440-R1	GIST-T1/829-20h-IM/MK-4440-R2	GIST-T1/829-20h-IM/MK-4440-R2	GIST-T1-R1	GIST-T1-R2	GIST-T1R3	GIST-T1-20h-IM/MK-4440-R1	GIST-T1-20h-IM/MK-4440-R2	GIST-T1-20h-IM/MK-4440-R2
P31350	Ribonucleoside-diphosphate reductase subunit M2	RRM2	21	18	59.6	44.877	113.94			31.4919	31.2077	31.0217	31.0609	30.4032	30.3088	31.0217	30.947	31.5618	26.8623	28.6764	29.461
P35237	Serpin B6	SERPINB6	8	8	30.6	42.621	51.092			28.5682	28.1747	28.632	28.4194	28.4113	28.9896	27.5898	NaN	29.3044	NaN	NaN	26.3844
Q13501	Sequestosome-1	SQSTM1	15	15	63.4	47.687	323.31			32.3879	32.5458	32.3672	31.7088	32.0084	31.5156	30.7533	30.7292	31.2479	27.5463	28.6216	29.4433
P52732	Kinesin-like protein KIF11	KIF11	23	23	30.3	119.16	135.28			30.1842	29.9117	29.8726	30.1604	29.7113	30.0217	28.4234	28.5203	29.0137	NaN	26.1642	26.7895
Q9NSY1	BMP-2-inducible protein kinase	BMP2K	15	14	23.6	129.17	110.32			27.9923	28.4629	28.459	27.5826	27.7581	27.7064	28.0711	27.9031	28.4433	NaN	26.1391	NaN
P11926	Ornithine decarboxylase	ODC1	7	7	21.3	51.148	48.766			27.6663	28.3023	28.3951	NaN	NaN	NaN	28.4394	28.3992	28.6764	NaN	NaN	26.4999
Q13085	Acetyl-CoA carboxylase 1;Biotin carboxylase	ACACA	21	21	15.9	265.55	48.92			28.7064	26.5638	NaN	29.066	25.3444	26.2571	28.7162	28.3196	28.17	27.1015	26.1155	25.7517
Q13439	Golgin subfamily A member 4	GOLGA4	29	29	18.2	261.14	323.31			28.5754	28.1164	28.2935	28.1065	27.9428	28.3367	26.9869	NaN	26.632	NaN	NaN	24.8385
P35555	Fibrillin-1	FBN1	44	42	24.5	312.24	276.99			29.2353	30.5573	30.5481	29.1459	30.8755	30.9746	29.0583	28.1556	27.6595	25.4769	26.632	26.965
O43294	Transforming growth factor beta-1-induced transcript 1 protein	TGFB1I1	11	11	37.7	49.814	59.161			29.9677	30.4629	30.846	29.0762	29.7437	30.6964	28.4823	27.4314	29.4551	26.8264	26.7129	NaN
Q8NEY1	Neuron navigator 1	NAV1	23	23	21	202.47	155.25			29.0762	29.114	29.0137	29.2625	28.3951	28.4394	29.6285	28.8324	29.6612	NaN	26.0874	28.267
Q14534	Squalene monooxygenase	SQLE	11	11	28.9	63.922	56.837			28.6285	27.9031	28.1652	29.6848	29.4551	29.0788	27.341	27.7517	27.5754	NaN	NaN	25.705
Q86YP4	Transcriptional repressor p66-alpha	GATAD2A	16	15	37.4	68.062	41.872			29.2308	29.2759	29.3536	29.0349	28.9677	28.9316	28.3066	NaN	28.6216	NaN	NaN	26.6595
Q12802	A-kinase anchor protein 13	AKAP13	38	38	26.4	307.55	261.62			29.8294	30.0217	29.9259	29.8741	30.0349	29.7833	27.611	25.4234	26.1965	NaN	NaN	24.8904
P46013	Antigen KI-67	MKI67	64	64	30	358.69	323.31			30.393	29.9259	30.8829	31.9259	31.3356	31.4284	30.2979	29.2647	30.4823	26.7517	27.9595	29.2147
Q6PL18	ATPase family AAA domain-containing protein 2	ATAD2	20	17	21.9	158.55	37.881			29.2147	29.4785	29.8519	28.9117	29.3196	29.9117	28.2625	28.0084	28.9814	NaN	26.2133	27.17
P52292	Importin subunit alpha-1	KPNA2	18	18	54.4	57.861	323.31			32.8385	32.6881	32.5296	32.4895	32.3223	32.2164	30.9609	30.8682	31.4919	29.2913	29.104	29.8974
Q7Z3E5	LisH domain-containing protein ARMC9	ARMC9	19	19	32.8	91.818	34.35			28.2891	27.4785	28.1937	28.249	28.1065	27.3992	29.5682	28.9456	30.0864	27.1312	27.1604	28.8974
P52943	Cysteine-rich protein 2	CRIP2	5	5	49.5	22.492	73.417			31.9188	31.7211	31.7533	31.4384	31.6881	31.6198	31.6458	31.0864	32.0927	29.5352	29.8872	30.9188
Q9BWU0	Kanadaptin	SLC4A1AP	14	14	37.1	88.813	138.88			29.0401	29.3848	29.4154	28.7064	29.0914	29.2123	28.019	27.2445	28.0401	NaN	26.3494	26.4425
Q9UQ35	Serine/arginine repetitive matrix protein 2	SRRM2	39	39	20.8	299.61	308.52			31.2479	31.2759	31.1239	30.8974	30.9188	30.9677	31.2479	30.6198	31.6501	29.1435	29.0889	30.6629
Q9ULT8	E3 ubiquitin-protein ligase HECTD1	HECTD1	28	28	19.5	289.38	144.09			29.2647	29.158	29.217	28.1164	28.5128	28.3066	29.1984	29.0609	29.4649	27.6595	27.976	27.8916
Q9Y4C2	TRPM8 channel-associated factor 1	TCAF1	12	12	17.3	102.12	26.42			27.8324	28.189	28.003	NaN	NaN	NaN	28.4976	28.1842	28.965	NaN	27.2262	NaN
P18583	Protein SON	SON	23	23	17.9	263.83	73.951			29.7676	29.2216	29.6915	29.4668	29.4154	29.0634	28.5826	28.6663	29.0737	26.417	26.4504	28.4862
Q9C004	Protein sprouty homolog 4	SPRY4	8	8	36.5	32.541	79.91			30.2759	30.5933	30.4919	30.3088	30.3196	30.2869	30.1115	29.995	30.0217	28.1361	NaN	29.158
O75534	Cold shock domain-containing protein E1	CSDE1	23	23	34.6	88.884	221.17			29.9539	30.2979	30.1361	29.3807	29.7162	29.4274	29.1866	29.1115	29.0711	26.726	28.2625	28.1312
Q9BU23	Lipase maturation factor 2	LMF2	4	4	9.5	79.697	60.276			NaN	NaN	NaN	NaN	NaN	NaN	NaN	26.2151	NaN	NaN	NaN	24.976
Q7Z7L8	Uncharacterized protein C11orf96	C11orf96	4	4	22.1	46.113	29.532			NaN	NaN	NaN	NaN	NaN	NaN	27.524	27.1015	28.1214	NaN	NaN	26.4122
Q7Z3T8	Zinc finger FYVE domain-containing protein 16	ZFYVE16	19	19	21.4	168.9	96.897			28.5426	28.877	28.8711	28.391	28.2979	28.1604	28.6931	28.7739	29.1913	NaN	26.7895	28.217
P42771	Cyclin-dependent kinase inhibitor 2A	CDKN2A	8	8	69.9	16.532	43.689			30.9117	30.7533	30.7692	30.4919	30.5203	30.3724	30.3515	30.196	30.7047	27.5609	29.3683	29.8519
O94915	Protein furry homolog-like	FRYL	22	22	11.5	339.59	30.843			25.8019	27.4314	26.9539	26.8264	28.3452	27.5826	28.6697	29.3346	29.4823	27.5609	27.7708	28.4746
P30566	Adenylosuccinate lyase	ADSL	11	11	35.5	54.889	36.267			29.7988	29.4995	28.9031	29.588	28.7581	28.7864	28.3023	28.0137	27.9977	26.4598	26.533	27.4938
Q8NHH9	Atlastin-2	ATL2	9	9	20.6	66.228	17.711			27.2891	27.2803	27.3153	26.9088	27.2803	27.17	27.189	27.1507	27.019	NaN	NaN	25.9271
P84077;P61204	ADP-ribosylation factor 1;ADP-ribosylation factor 3	ARF1;ARF3	9	5	69.6	20.697	26.547			31.8829	31.8755	31.7453	31.6198	31.6881	31.6415	32.4556	31.9746	31.9677	30.7692	30.2308	31.5664
Q9Y520	Protein PRRC2C	PRRC2C	24	24	15.6	316.91	141.09			30.0084	29.9814	29.7629	29.6527	29.6268	29.341	29.2647	28.7988	29.55	NaN	27.5898	28.459
P41240	Tyrosine-protein kinase CSK	CSK	17	17	49.8	50.704	36.615			30.0349	29.6697	29.7244	29.6492	29.267	29.3153	27.5826	27.5315	28.4862	NaN	26.5711	26.9977
Q96T88	E3 ubiquitin-protein ligase UHRF1	UHRF1	19	19	32.4	89.813	235.86			29.9814	29.6181	29.9117	29.6285	29.4785	29.5844	27.6527	28.6285	28.8081	NaN	26.1507	27.9484
P84243	Histone H3.3	H3F3A	4	1	40.4	15.328	35.841			NaN	NaN	31.4775	30.5389	31.8682	32.1422	NaN	34.0266	NaN	33.1574	33.0958	32.3828
Q7Z5L9	Interferon regulatory factor 2-binding protein 2	IRF2BP2	12	10	39.7	61.024	104.72			29.8638	29.3324	29.099	29.8974	29.5352	29.2913	29.114	29.0003	29.2869	28.0505	NaN	NaN
Q8WWM7	Ataxin-2-like protein	ATXN2L	22	22	38.3	113.37	113.36			29.9677	29.9117	29.6337	29.326	29.258	29.1866	29.0914	28.7549	29.2077	27.7064	28.4668	27.509
Q9Y6A5	Transforming acidic coiled-coil-containing protein 3	TACC3	10	10	22.9	90.359	33.769			28.0084	27.5389	27.3992	27.8799	27.4154	27.0711	27.9146	27.524	28.1984	NaN	NaN	26.8385
Q9Y6I3	Epsin-1	EPN1	11	10	29.7	60.293	86.803			29.0164	29.104	29.1913	28.906	29.1747	29.1724	28.6181	28.3745	28.8887	NaN	27.5969	27.5463
O43149	Zinc finger ZZ-type and EF-hand domain-containing protein 1	ZZEF1	14	14	8.8	331.07	31.494			26.3578	27.4394	27.4938	26.9203	27.189	27.8504	27.7833	27.8142	27.8081	26.1507	26.3031	27.4234
P42858	Huntingtin	HTT	22	22	11.5	347.6	64.649			NaN	NaN	25.705	NaN	NaN	25.8433	28.8945	28.4314	28.3745	26.8142	27.5014	28.0349
Q6P996	Pyridoxal-dependent decarboxylase domain-containing protein 1	PDXDC1	23	23	48.5	86.706	76.032			27.3745	27.9814	28.4314	27.2979	27.1604	27.7195	29.5052	30.0084	29.8974	27.7325	29.0839	29.1532
Q8N8S7	Protein enabled homolog	ENAH	16	16	31.3	66.509	84.366			29.5898	30.362	29.6424	29.94	29.5573	29.3515	28.7549	27.524	28.7895	27.673	27.2891	27.3578
Q96A49	Synapse-associated protein 1	SYAP1	13	13	49.1	39.933	110.79			29.9259	29.8294	29.8623	29.4214	29.7833	29.6372	29.2979	29.2803	29.4354	28.4976	28.2445	28.2262
O75179	Ankyrin repeat domain-containing protein 17	ANKRD17	20	14	13.5	274.25	89.739			28.8355	28.2625	28.4707	27.8799	28.141	26.9428	28.2123	28.2399	28.2714	26.9977	27.8564	26.5609
Q9UG63	ATP-binding cassette sub-family F member 2	ABCF2	17	17	29.5	71.289	53.591			30.2193	30.196	30.1604	29.5536	29.4938	29.3346	29.8127	29.5296	30.1361	NaN	28.2077	29.2979
Q9BQE3	Tubulin alpha-1C chain	TUBA1C	31	3	81.7	49.895	92.729			29.4938	29.3807	29.141	29.1386	29.4214	29.2239	29.4134	29.1263	29.5844	27.0296	27.8264	29.3828
Q9UHB6	LIM domain and actin-binding protein 1	LIMA1	25	25	45.1	85.225	146.66			30.9188	31.6415	31.717	30.4727	31.5389	31.6458	30.7292	30.6544	31.3776	29.0813	30.0217	30.5389
O95197	Reticulon-3	RTN3	2	2	4.8	112.61	78.821			30.1239	29.6831	29.6128	29.8741	30.0084	30.1115	30.196	29.8264	29.94	NaN	28.3578	29.5389
O43847	Nardilysin	NRD1	19	19	16.7	131.7	27.312			28.632	28.7064	27.4234	28.3367	28.0084	28.267	29.1532	28.6898	28.9567	28.5646	27.8682	27.3578
Q9Y613	FH1/FH2 domain-containing protein 1	FHOD1	25	25	34.1	126.55	116.22			29.2054	29.0531	28.7708	29.1913	28.8203	28.7708	29.0583	28.9146	28.9705	27.7708	28.3951	27.9595
Q63ZY3	KN motif and ankyrin repeat domain-containing protein 2	KANK2	23	22	43.1	91.173	280.07			30.1239	30.1483	30.2422	29.9539	29.8035	30.0217	29.726	29.6798	30.0609	28.4473	28.6998	29.4473
Q15021	Condensin complex subunit 1	NCAPD2	23	23	24.2	157.18	165.83			29.6407	29.4134	29.189	29.4374	29.1676	29.4012	28.8534	28.8829	29.1652	NaN	26.9203	28.7064
Q96RW7	Hemicentin-1	HMCN1	42	42	12.4	613.38	233.89			28.5646	28.1115	28.6898	29.7911	29.4032	29.5969	27.6931	27.4073	NaN	NaN	27.2625	25.6891
Q99661	Kinesin-like protein KIF2C	KIF2C	17	16	35.6	81.312	151.71			29.94	29.5844	29.7227	29.7129	29.6128	29.2123	29.4492	29.3515	29.6948	26.8142	29.1459	28.9869
Q8WWQ0	PH-interacting protein	PHIP	27	25	25.9	206.69	193.13			30.1604	29.3536	29.8234	30.1604	29.9539	30.0609	29.1532	28.7864	29.3001	27.3745	27.5969	29.0583
Q7Z3C6	Autophagy-related protein 9A	ATG9A	10	10	16.8	94.446	17.911			27.4314	27.0505	26.9539	27.4473	26.8264	26.9316	26.9869	27.0401	27.17	NaN	NaN	26.1927
Q96F86	Enhancer of mRNA-decapping protein 3	EDC3	5	5	18.7	56.077	46.314			27.341	27.3324	27.7895	26.9869	26.976	27.0296	26.632	26.2821	26.2481	NaN	25.5463	NaN
Q9H2J4	Phosducin-like protein 3	PDCL3	6	6	41.4	27.614	11.955			27.6251	27.673	27.6798	27.1214	26.965	27.0296	26.9428	27.2625	27.726	NaN	26.329	26.6458
Q9C0E8	Protein lunapark	LNP	4	4	16.1	47.739	16.714			NaN	NaN	NaN	NaN	NaN	NaN	27.9428	27.9539	28.0137	NaN	26.7517	27.4154
Q96H79	Zinc finger CCCH-type antiviral protein 1-like	ZC3HAV1L	9	9	45.7	32.962	152			30.1604	30.2077	30.1361	30.0349	30.1604	30.0479	30.5296	30.3515	30.9677	29.0057	29.8579	30.2535
Q9BZL6	Serine/threonine-protein kinase D2	PRKD2	19	16	35.2	96.721	60.105			29.588	29.5407	29.3828	29.6475	29.1263	29.0788	28.6964	28.3578	29.196	26.6865	28.1115	28.4938
Q9Y5A9	YTH domain-containing family protein 2	YTHDF2	9	7	20	62.333	23.881			29.0003	28.805	28.8173	28.5718	28.579	28.217	27.9428	28.3828	28.2759	NaN	27.3745	NaN
Q9UBE0	SUMO-activating enzyme subunit 1;SUMO-activating enzyme subunit 1, N-terminally processed	SAE1	12	12	51.4	38.449	162.56			29.7597	29.8081	29.8872	29.6764	29.788	29.8035	29.3766	29.3239	29.4374	27.2535	28.7195	29.099
O15294	UDP-N-acetylglucosamine--peptide N-acetylglucosaminyltransferase 110 kDa subunit	OGT	29	29	40.8	116.92	149.76			30.196	30.1483	30.099	30.1115	30.0864	30.0217	29.8741	29.7325	30.0349	27.524	29.3066	29.6022
Q9C0C2	182 kDa tankyrase-1-binding protein	TNKS1BP1	46	46	47.5	181.79	323.31			30.9117	31.1361	31.0609	30.5203	30.947	30.846	31.0927	30.8081	31.2135	28.9287	30.5014	30.6798
Q05209	Tyrosine-protein phosphatase non-receptor type 12	PTPN12	13	13	25.8	88.105	133.95			29.1604	29.1507	28.9031	28.8682	29.099	28.5315	28.9677	28.6492	28.673	NaN	27.1604	28.4551
Q9BQS8	FYVE and coiled-coil domain-containing protein 1	FYCO1	14	14	16.2	166.98	45.021			26.6458	NaN	26.1174	26.726	27.019	NaN	27.8916	27.5826	27.1984	26.8741	27.0914	26.1738
Q96BH1	E3 ubiquitin-protein ligase RNF25	RNF25	5	5	18.7	51.218	19.567			27.4473	27.217	27.1984	26.7645	26.7645	NaN	27.0609	27.1984	27.189	NaN	NaN	26.341
Q9UN86	Ras GTPase-activating protein-binding protein 2	G3BP2	8	7	24.7	54.12	36.348			30.3724	30.2422	30.0479	30.0609	29.8799	29.7502	30.3196	30.2535	30.4532	29.2535	29.267	29.9814
P40222	Alpha-taxilin	TXLNA	21	21	52.2	61.89	269.3			31.0217	31.015	30.9539	30.4823	30.4334	30.4134	30.7849	30.7129	30.9117	30.1604	29.8887	29.9677
Q8N0X7	Spartin	SPG20	10	10	24.3	72.832	39.62			28.8264	28.4823	28.0965	28.0914	28.2353	27.8019	28.4512	27.8858	28.7031	27.4073	27.7581	NaN
Q7Z460	CLIP-associating protein 1	CLASP1	19	17	20.9	169.45	166.43			28.1604	27.8682	27.6663	27.9539	27.9146	27.7771	29.1337	29.4214	29.5591	27.8974	28.8799	28.8142
P52594	Arf-GAP domain and FG repeat-containing protein 1	AGFG1	6	6	18.9	58.259	200.41			28.7771	28.7549	28.4862	28.1459	28.4938	28.5609	28.2803	27.8974	28.3494	NaN	NaN	27.4073
Q9UKZ9	Procollagen C-endopeptidase enhancer 2	PCOLCE2	9	9	33.7	45.716	28.956			28.3704	28.8142	28.7129	28.2714	29.0531	28.995	28.4938	NaN	28.3023	NaN	NaN	27.6181
O60610	Protein diaphanous homolog 1	DIAPH1	21	21	23.3	141.35	60.294			29.341	29.5933	28.7708	29.3088	28.9287	28.4785	28.6798	28.7031	28.5826	27.9484	27.5536	28.0762
Q16222	UDP-N-acetylhexosamine pyrophosphorylase;UDP-N-acetylgalactosamine pyrophosphorylase;UDP-N-acetylglucosamine pyrophosphorylase	UAP1	16	15	38.9	58.768	208.08			30.1604	29.7973	29.8755	30.3088	29.8264	29.5481	30.8608	30.8755	30.362	29.7676	30.0217	30.0217
Q96SB4	SRSF protein kinase 1	SRPK1	10	8	20.9	74.324	17.501			28.3066	27.4154	27.2803	27.6389	27.019	27.4234	27.2714	27.2714	26.7389	NaN	26.4707	26.1927
Q9H019	Mitochondrial fission regulator 1-like	MTFR1L	4	4	20.5	31.957	7.7391			NaN	26.2077	26.019	NaN	26.1604	26.2643	26.5374	26.1738	27.141	NaN	NaN	25.8997
Q13045	Protein flightless-1 homolog	FLII	19	19	25.8	144.75	141.32			29.2007	29.3848	29.21	29.066	29.2445	29.2957	28.8355	28.8081	28.8682	26.4707	28.3023	28.6424
P35556	Fibrillin-2	FBN2	59	57	32.6	314.77	323.31			30.3828	32.0895	31.7692	30.2077	32.375	32.0316	29.8157	29.4938	30.2308	28.8858	29.0296	29.3683
Q9UHN6	Transmembrane protein 2	TMEM2	23	22	20.5	154.37	38.064			28.2216	28.6663	27.8324	27.3745	27.8264	NaN	29.4053	29.2557	29.0322	29.0296	28.6764	27.0401
Q9H2M9	Rab3 GTPase-activating protein non-catalytic subunit	RAB3GAP2	26	26	27.4	155.98	66.659			28.8653	28.8534	29.0322	28.8203	28.6285	28.4394	29.3807	29.5352	29.4254	28.1604	28.6931	29.0531
Q2NKX8	DNA excision repair protein ERCC-6-like	ERCC6L	18	18	22.2	141.1	68.456			28.4707	28.4154	28.6492	28.3066	28.2123	28.2803	27.8799	27.6527	28.217	NaN	NaN	27.17
Q14847	LIM and SH3 domain protein 1	LASP1	11	11	41.4	29.717	87.307			30.1483	30.7771	30.6285	29.9539	30.6629	30.4433	30.1724	29.4134	30.5296	29.1724	29.2422	29.5826
Q8N961	Ankyrin repeat and BTB/POZ domain-containing protein 2	ABTB2	4	4	5.6	113.65	7.7154			NaN	24.7895	NaN	NaN	NaN	NaN	26.1642	26.1565	NaN	NaN	25.3975	NaN
Q9BW19	Kinesin-like protein KIFC1	KIFC1	8	8	20.8	73.747	166.44			27.4707	27.1015	27.0813	27.5826	27.189	27.0813	27.5609	27.3745	27.7833	NaN	NaN	26.8264
P02786	Transferrin receptor protein 1;Transferrin receptor protein 1, serum form	TFRC	20	20	32.1	84.87	308.13			31.2308	31.4581	30.8974	31.1724	30.9609	30.7292	29.8096	29.3807	29.4571	28.249	28.6595	29.3044
Q9BV68	E3 ubiquitin-protein ligase RNF126	RNF126	3	3	14.8	33.861	11.591			NaN	NaN	NaN	NaN	26.8741	NaN	NaN	27.726	27.5609	NaN	NaN	26.8858
P41567	Eukaryotic translation initiation factor 1	EIF1	8	3	76.1	12.732	44.064			30.3515	30.4433	30.4032	30.0349	30.2422	29.94	29.6163	29.0243	29.726	NaN	NaN	28.7325
P30279	G1/S-specific cyclin-D2	CCND2	6	5	31.1	33.067	18.65			26.9977	27.9203	27.8799	NaN	26.6998	27.0401	27.17	27.2445	27.3578	NaN	NaN	26.515
Q8IWE2	Protein NOXP20	FAM114A1	11	11	29.1	60.741	183.85			NaN	26.5135	26.2408	NaN	27.1604	NaN	29.5862	28.9923	28.8653	28.4512	28.3494	28.5203
O00401	Neural Wiskott-Aldrich syndrome protein	WASL	6	6	24.2	54.826	24.407			27.9595	28.0349	28.1652	27.4234	27.7833	27.8264	NaN	27.7389	28.3494	NaN	NaN	27.3324
Q86XZ4	Spermatogenesis-associated serine-rich protein 2	SPATS2	9	9	29	59.544	115			29.9677	29.8974	29.8814	29.2007	29.4919	29.2422	30.1483	29.8081	29.8309	NaN	29.158	29.2353
O00743	Serine/threonine-protein phosphatase 6 catalytic subunit;Serine/threonine-protein phosphatase 6 catalytic subunit, N-terminally processed	PPP6C	8	8	37.4	35.144	37.928			29.4113	29.3153	29.1652	29.1747	29.3109	29.2825	29.6441	29.4374	29.341	27.8916	28.9316	29.1312
Q9P246	Stromal interaction molecule 2	STIM2	15	14	34	83.97	243.46			28.4234	27.4551	27.7129	28.3239	27.2979	27.4862	30.0349	30.1361	30.362	29.099	29.2216	29.8974
Q8WX93	Palladin	PALLD	15	15	22	150.56	108.56			28.2759	29.0084	28.9231	27.7195	28.3494	28.5128	28.0864	27.9146	29.3324	NaN	26.9869	28.4032
O60232	Sjoegren syndrome/scleroderma autoantigen 1	SSSCA1	7	7	69.8	21.474	32.671			29.1189	29.1189	28.9117	28.9677	29.0137	28.6285	28.7129	28.5463	28.5536	NaN	27.6865	28.0505
O14683	Tumor protein p53-inducible protein 11	TP53I11	2	2	13.2	21.054	5.759			28.0084	27.3494	27.4234	27.9316	27.3992	27.2714	28.1652	28.2308	28.6697	27.6389	NaN	27.673
Q96EK5	KIF1-binding protein	KIAA1279	9	9	26.4	71.813	33.178			29.2714	29.0914	29.0427	29.2825	29.1312	29.1337	28.6697	28.4354	28.5315	NaN	28.0557	27.5754
Q9UNN8	Endothelial protein C receptor	PROCR	3	3	15.1	26.671	6.2344			26.7517	27.0401	26.7895	26.9977	NaN	26.9088	27.341	27.17	27.0296	NaN	NaN	26.4738
O14558	Heat shock protein beta-6	HSPB6	5	5	55	17.135	22.294			27.7895	28.632	28.3704	27.6251	28.4785	28.4512	29.1337	28.5014	29.4629	NaN	28.0084	28.6629
Q9BRX2	Protein pelota homolog	PELO	9	9	28.8	43.359	26.716			28.4032	28.4473	28.6458	28.4862	28.4073	28.4512	28.1604	28.1795	28.1604	NaN	27.2535	27.632
Q58FF8	Putative heat shock protein HSP 90-beta 2	HSP90AB2P	10	2	20.5	44.348	66.581			31.7965	31.846	31.7333	31.9643	31.7771	31.5844	32.3905	32.525	32.2193	30.94	32.0609	31.8119
Q99615	DnaJ homolog subfamily C member 7	DNAJC7	14	14	34.2	56.44	32.443			28.8741	28.6764	28.1015	28.4314	28.0401	27.8916	27.5536	26.1174	27.9977	NaN	26.3629	26.9977
Q6NZY4	Zinc finger CCHC domain-containing protein 8	ZCCHC8	14	14	36.8	78.576	293.73			28.55	28.8203	29.0375	28.4668	28.604	28.7802	28.6492	28.3662	28.55	27.2714	27.9869	28.0864
P11166	Solute carrier family 2, facilitated glucose transporter member 1	SLC2A1	3	3	10	54.083	18.076			27.0813	27.0914	26.6998	NaN	NaN	NaN	27.0084	27.0505	27.3324	NaN	NaN	26.4346
Q9BZQ8	Protein Niban	FAM129A	23	23	30.1	103.13	153.69			30.6544	31.0349	31.3088	30.393	31.0084	31.1177	29.104	29.1386	28.9174	28.3745	28.6005	28.0505
Q9ULE6	Paladin	PALD1	14	14	25.1	96.753	46.606			26.8019	NaN	NaN	27.6251	26.7771	26.5389	29.2891	29.4804	26.9977	28.2803	29.0057	26.3187
O95819	Mitogen-activated protein kinase kinase kinase kinase 4	MAP4K4	13	6	17.4	142.1	29.594			26.3153	NaN	NaN	26.2262	NaN	27.1795	28.5426	28.6831	27.8081	NaN	27.726	27.6798
P53814	Smoothelin	SMTN	18	18	30.5	99.058	190.81			29.4354	29.5463	29.5754	29.6075	29.2825	29.0531	29.141	29.1312	29.4492	28.7453	28.3662	28.5463
Q15645	Pachytene checkpoint protein 2 homolog	TRIP13	19	19	54.2	48.55	70.691			30.3724	30.4629	30.2979	30.3303	30.5389	30.3196	29.843	29.5296	30.0479	27.726	29.4314	29.611
P82979	SAP domain-containing ribonucleoprotein	SARNP	8	8	39.5	23.671	50.836			29.4995	29.0243	29.0531	29.4765	29.1189	29.0217	29.1189	28.7988	29.3217	28.3494	NaN	28.4707
O95208	Epsin-2	EPN2	3	3	6.9	68.481	9.8069			NaN	25.1984	NaN	NaN	NaN	NaN	25.945	NaN	NaN	NaN	NaN	25.2607
Q7Z7E8	Ubiquitin-conjugating enzyme E2 Q1	UBE2Q1	5	5	27.5	46.126	47.637			27.6389	27.7645	27.4785	27.391	27.4073	27.2625	27.3153	27.5536	27.3153	NaN	NaN	26.7129
Q9ULH0	Kinase D-interacting substrate of 220 kDa	KIDINS220	16	16	14.8	196.54	96.687			27.391	27.189	26.8741	26.9539	NaN	26.3324	27.4394	27.611	27.7195	27.1115	26.726	26.8741
Q6P9B6	TLD domain-containing protein 1	TLDC1	4	4	15.8	50.993	8.1261			26.2426	NaN	26.1681	NaN	26.0338	NaN	27.4785	26.521	NaN	NaN	26.0526	26.6865
Q9Y5V3	Melanoma-associated antigen D1	MAGED1	7	5	17	86.16	65.456			26.976	27.2625	27.2535	26.4598	26.9869	27.0401	26.632	26.726	26.726	NaN	26.0212	NaN
Q9UHR4	Brain-specific angiogenesis inhibitor 1-associated protein 2-like protein 1	BAIAP2L1	14	14	35.8	56.882	68.231			26.8858	27.019	27.5165	26.726	26.8142	26.7771	28.6595	28.391	28.1459	27.8799	28.0243	27.2353
Q13492	Phosphatidylinositol-binding clathrin assembly protein	PICALM	10	8	22.4	70.754	79.61			29.2467	29.2445	29.094	29.0243	29.1652	29.003	29.003	28.9031	28.9977	NaN	28.1937	28.4113
O15357	Phosphatidylinositol 3,4,5-trisphosphate 5-phosphatase 2	INPPL1	25	25	32	138.6	85.126			28.8887	29.027	28.9456	28.7517	28.8711	28.8741	29.1065	29.0609	29.1263	27.604	28.7581	28.6898
Q9UN37	Vacuolar protein sorting-associated protein 4A	VPS4A	12	9	30.2	48.897	19.822			29.588	29.1984	29.0453	29.4012	29.0296	28.9705	29.1507	29.0164	29.326	28.362	NaN	28.6424
Q13895	Bystin	BYSL	15	15	44.2	49.601	30.678			28.3992	28.0505	28.0557	28.509	27.8203	27.9977	29.2714	29.158	29.1507	28.1115	28.7833	28.6595
P31689	DnaJ homolog subfamily A member 1	DNAJA1	12	12	40.6	44.868	78.03			31.2814	31.4678	31.2869	30.94	30.9882	30.8234	30.6285	30.7692	30.94	30.2193	30.0737	30.1115
Q14651	Plastin-1	PLS1	20	17	44.8	70.253	151.15			30.1239	30.8901	31.015	29.7178	30.362	30.5933	27.4234	27.9484	28.9705	27.7581	26.5135	28.1312
Q9NPD8	Ubiquitin-conjugating enzyme E2 T	UBE2T	5	5	30.5	22.521	88.571			28.9146	28.3662	28.7988	28.3828	27.8858	28.5718	27.7895	27.8445	27.673	NaN	27.2625	26.9869
P49790	Nuclear pore complex protein Nup153	NUP153	19	19	23.5	153.94	112.64			28.4032	28.2353	28.3367	28.4746	28.459	28.341	28.6355	28.3494	28.8142	27.2353	28.1263	28.3367
Q6ZRP7	Sulfhydryl oxidase 2	QSOX2	7	7	14.8	77.528	15.052			26.9203	27.0505	26.8623	26.6998	26.7645	26.5898	27.4394	27.509	27.4785	26.9088	26.8264	26.7645
O15042	U2 snRNP-associated SURP motif-containing protein	U2SURP	22	22	29.3	118.29	98.341			30.3828	30.2077	30.1239	30.1115	29.6881	30.0349	29.4765	29.509	29.49	28.6424	29.0634	28.8294
Q53EP0	Fibronectin type III domain-containing protein 3B	FNDC3B	17	17	23.8	132.89	91.564			29.5426	29.7958	30.1483	28.4823	29.2979	29.2913	27.8741	28.6146	29.0737	NaN	27.3828	28.3828
O75155	Cullin-associated NEDD8-dissociated protein 2	CAND2	17	14	22.2	135.25	53.163			NaN	NaN	NaN	NaN	NaN	NaN	28.3494	28.1747	28.5165	27.4629	26.965	28.3745
Q9BTY7	Protein HGH1 homolog	HGH1	13	13	52.1	42.129	73.353			29.4032	29.5573	29.5165	29.2445	29.2147	29.4413	28.9512	28.6527	28.8887	28.0762	28.217	28.3109
Q8IZH2	5-3 exoribonuclease 1	XRN1	14	14	12.7	194.1	95.731			28.1263	28.1604	28.1556	28.1065	28.1842	28.1065	27.8324	27.8623	28.1747	26.9977	27.0914	27.7771
P42575	Caspase-2;Caspase-2 subunit p18;Caspase-2 subunit p13;Caspase-2 subunit p12	CASP2	12	12	39.6	50.685	39.299			28.5969	28.2891	28.1652	28.4746	28.1604	27.7064	29.2331	29.4919	29.5736	NaN	28.5609	29.019
O00267	Transcription elongation factor SPT5	SUPT5H	18	18	26.9	121	177.42			29.2803	29.2602	29.3066	29.0349	29.4174	29.1337	27.7389	27.6458	28.203	27.17	27.3578	27.2353
Q9NRR5	Ubiquilin-4	UBQLN4	9	6	19.5	63.852	35.892			NaN	NaN	NaN	NaN	NaN	NaN	26.6865	NaN	NaN	NaN	NaN	26.0588
P55010	Eukaryotic translation initiation factor 5	EIF5	12	12	28.3	49.222	59.636			30.5014	30.611	30.6198	30.0349	30.2759	29.9814	29.9259	30.0217	30.1724	29.1386	29.49	29.5808
Q8IXB1	DnaJ homolog subfamily C member 10	DNAJC10	14	14	27.1	91.079	122.98			27.0609	25.9157	26.141	27.3662	26.0212	26.2909	28.8142	28.8203	28.7645	26.8858	28.3109	28.7517
Q6Y7W6	PERQ amino acid-rich with GYF domain-containing protein 2	GIGYF2	13	13	16.9	150.07	169.12			29.1937	28.9787	29.1435	28.8019	28.7771	28.6898	29.0686	28.3578	29.141	28.0914	NaN	28.4354
Q9BX40	Protein LSM14 homolog B	LSM14B	6	6	35.1	42.07	234.05			28.6389	28.995	28.7581	28.1652	28.4194	28.3282	28.2625	28.0813	28.6389	NaN	NaN	27.7325
Q6PKG0	La-related protein 1	LARP1	23	23	36.4	123.51	144.9			30.0864	29.8887	29.5352	29.7849	29.5147	29.2422	29.6181	29.4995	29.6337	NaN	28.9923	28.9484
P53611	Geranylgeranyl transferase type-2 subunit beta	RABGGTB	4	4	13	36.924	4.64			26.5404	NaN	26.8504	NaN	26.8264	26.673	26.7895	NaN	NaN	NaN	NaN	26.1776
Q86VY4	Testis-specific Y-encoded-like protein 5	TSPYL5	7	7	30.9	45.143	73.958			29.1263	29.3557	29.0505	28.4746	28.8203	28.7129	27.6931	27.2445	27.8081	NaN	NaN	26.9869
P09486	SPARC	SPARC	7	7	37	34.632	50.39			29.3324	29.2647	28.5463	29.7195	29.5147	29.158	NaN	28.1263	28.6181	NaN	26.7771	28.3704
Q5UIP0	Telomere-associated protein RIF1	RIF1	10	10	5.7	274.46	15.303			26.7645	26.7771	26.726	26.8974	NaN	NaN	27.1115	27.1795	27.965	NaN	26.8623	NaN
O14828	Secretory carrier-associated membrane protein 3	SCAMP3	10	10	40.1	38.287	35.15			29.6781	29.7502	29.3869	29.7146	29.49	29.3807	29.0788	29.3153	29.1507	28.5609	28.5573	28.6146
P63173	60S ribosomal protein L38	RPL38	4	4	48.6	8.2178	7.9185			30.8309	30.6798	30.8081	30.6372	30.5754	30.7129	30.0349	30.1239	30.4032	28.6424	29.2957	30.3196
Q9BYJ9	YTH domain-containing family protein 1	YTHDF1	8	5	23.1	60.873	34.37			29.3066	29.2399	29.1189	28.7549	28.7864	28.9259	28.4234	28.2535	28.4354	NaN	27.5165	27.976
Q6NYC8	Phostensin	PPP1R18	10	10	28.7	67.942	92.273			28.7486	28.5718	28.4234	28.5165	27.976	28.1604	28.7421	28.5426	29.3109	NaN	27.9595	28.5718
P62942	Peptidyl-prolyl cis-trans isomerase FKBP1A	FKBP1A	4	4	73.1	11.951	8.9974			NaN	29.837	29.7818	30.2647	29.8035	29.94	NaN	29.7927	NaN	NaN	NaN	29.189
Q9GZQ8;A6NCE7	Microtubule-associated proteins 1A/1B light chain 3B;Microtubule-associated proteins 1A/1B light chain 3 beta 2	MAP1LC3B;MAP1LC3B2	4	2	27.2	14.688	3.2615			27.5609	27.4629	27.509	27.3153	NaN	NaN	27.1312	27.3239	27.4551	NaN	NaN	26.7129
Q9NR50	Translation initiation factor eIF-2B subunit gamma	EIF2B3	8	8	26.8	50.24	61.679			28.8887	28.9146	29.0401	28.8142	28.632	28.8474	29.1937	28.965	29.1337	27.4862	28.5315	29.0634
Q7Z3U7	Protein MON2 homolog	MON2	11	11	7.3	190.36	36.719			27.019	26.9977	27.1015	26.4953	26.976	27.0401	27.5969	27.6251	27.1604	26.8142	26.9088	26.9088
Q9UP95	Solute carrier family 12 member 4	SLC12A4	19	17	21.4	120.65	41.604			26.9869	27.9539	27.8916	27.3745	27.9869	27.6931	28.7676	28.3787	28.9316	NaN	28.0813	28.1459
Q15942	Zyxin	ZYX	23	23	64.9	61.277	323.31			32.7573	33.3828	33.6629	32.0832	32.8682	33.0785	31.7692	31.7373	32.8215	31.2193	31.362	32.08
P20290	Transcription factor BTF3	BTF3	7	7	51	22.168	323.31			31.13	31.0609	30.995	30.6458	30.7129	30.5933	30.6881	30.4919	30.6881	30.2535	29.7195	30.0609
P61956	Small ubiquitin-related modifier 2	SUMO2	3	3	33.7	10.871	5.134			30.341	30.3196	30.3088	30.6022	31.0084	30.3303	29.6337	29.651	29.5591	29.003	NaN	29.0322
P42224	Signal transducer and activator of transcription 1-alpha/beta	STAT1	25	25	41.3	87.334	108.77			30.6964	30.8004	30.9539	30.3303	30.6798	30.7927	31.4384	31.4919	31.0673	30.7692	30.8157	30.6544
Q9NPQ8	Synembryn-A	RIC8A	15	14	36.3	59.709	37.901			27.6865	27.7645	27.4862	26.0813	27.4314	27.0914	29.1459	29.3599	29.2714	28.1115	28.4394	29.2262
Q9C0C9	E2/E3 hybrid ubiquitin-protein ligase UBE2O	UBE2O	24	24	29.3	141.29	62.294			29.249	29.2825	29.4354	29.0583	29.1386	29.141	29.6848	29.6544	29.6441	28.8415	29.2891	29.0453
O75717	WD repeat and HMG-box DNA-binding protein 1	WDHD1	25	25	36.2	125.97	79.806			29.8534	28.5646	29.6578	30.0349	29.7645	29.2825	25.867	26.417	27.8504	NaN	26.5754	26.143
Q9H910	Hematological and neurological expressed 1-like protein	HN1L	6	6	51.6	20.063	15.107			29.604	29.6814	29.57	29.5573	29.5736	29.4073	29.7942	29.2445	29.8004	NaN	28.4354	29.4823
Q16352	Alpha-internexin	INA	23	21	50.1	55.39	323.31			30.1361	31.2365	31.5664	30.2647	31.2924	31.6713	29.6285	29.459	29.5646	28.4512	29.3001	29.0349
P51665	26S proteasome non-ATPase regulatory subunit 7	PSMD7	11	11	46.9	37.025	97.24			30.4919	30.341	30.2308	30.2647	30.2869	30.2759	30.5933	30.4532	30.2759	28.5898	30.1604	30.3088
P46937	Transcriptional coactivator YAP1	YAP1	7	7	30.6	54.461	53.582			27.4314	27.7195	27.5898	27.391	27.3239	27.4707	NaN	NaN	27.7895	NaN	NaN	27.2077
Q9Y547	Intraflagellar transport protein 25 homolog	HSPB11	4	4	36.1	16.297	21.195			NaN	27.3239	27.2979	26.9428	27.1795	27.1214	27.9031	27.8081	NaN	NaN	27.5315	26.965
Q9NVG8	TBC1 domain family member 13	TBC1D13	14	14	43.2	46.553	182.17			28.3578	28.49	28.6764	28.4938	28.5609	28.5969	29.651	29.6612	29.604	28.0864	29.3153	29.4473
Q9Y3S2	Zinc finger protein 330	ZNF330	3	3	20	36.201	8.2954			26.7771	26.7389	26.8623	NaN	26.4441	26.3975	26.4754	26.8019	NaN	NaN	NaN	26.0752
Q9Y478	5-AMP-activated protein kinase subunit beta-1	PRKAB1	3	3	17.8	30.382	13.107			NaN	NaN	NaN	NaN	NaN	NaN	27.3745	27.141	27.217	NaN	26.673	NaN
Q96EC8	Protein YIPF6	YIPF6	3	3	12.7	26.256	6.4415			26.1871	NaN	NaN	NaN	NaN	25.867	NaN	27.019	NaN	NaN	NaN	26.4488
O14744	Protein arginine N-methyltransferase 5;Protein arginine N-methyltransferase 5, N-terminally processed	PRMT5	13	13	32.5	72.683	38.798			29.7502	29.5916	29.3388	29.7453	29.6163	29.4668	29.1937	29.0686	29.2054	27.4707	28.8385	29.0164
Q9UGV2	Protein NDRG3	NDRG3	11	11	49.9	41.408	317.76			29.2376	29.3196	29.0479	29.3131	29.2054	29.5109	26.275	NaN	28.0609	NaN	26.8623	NaN
Q8TEQ6	Gem-associated protein 5	GEMIN5	35	35	35.7	168.59	212.33			30.5933	30.2308	30.0349	30.3515	30.0609	29.7096	30.3303	30.3088	30.341	29.2602	29.8974	29.995
Q92974	Rho guanine nucleotide exchange factor 2	ARHGEF2	20	20	28.6	111.54	128.97			30.2869	30.1483	29.995	29.7802	29.8309	29.4707	29.3848	29.6022	29.632	NaN	28.8858	29.0634
Q99961	Endophilin-A2	SH3GL1	11	11	38.9	41.489	98.538			30.362	30.4032	30.4727	30.1842	30.2308	30.2193	30.4919	30.5481	30.3724	29.9539	29.8697	29.893
Q9Y6H1;Q5T1J5	Coiled-coil-helix-coiled-coil-helix domain-containing protein 2;Putative coiled-coil-helix-coiled-coil-helix domain-containing protein CHCHD2P9, mitochondrial	CHCHD2;CHCHD2P9	4	4	33.8	15.512	79.301			29.3515	29.258	29.2422	29.1263	29.0401	28.8504	28.9923	29.0583	28.7988	28.4314	28.4746	28.258
Q99447	Ethanolamine-phosphate cytidylyltransferase	PCYT2	9	9	36.8	43.835	50.039			27.5682	NaN	27.0401	27.6998	27.2979	27.0711	28.2216	27.9814	27.509	NaN	27.5389	27.189
Q8WV99	AN1-type zinc finger protein 2B	ZFAND2B	4	4	30.7	28.022	18.778			26.7895	26.8741	26.8858	26.3031	26.5624	26.5609	26.6181	26.6458	26.673	NaN	NaN	26.0874
Q3ZCM7	Tubulin beta-8 chain	TUBB8	10	2	24.5	49.775	71.744			33.9153	33.8792	33.8792	33.8516	34.1529	33.9063	34.3568	34.0017	34.2336	33.0299	33.6307	34.0832
Q14444	Caprin-1	CAPRIN1	15	15	29.8	78.365	156.93			31.099	31.2077	31.0349	30.947	30.7533	30.7771	30.8234	30.9259	30.8081	30.1361	30.2759	30.4532
Q9UJC3	Protein Hook homolog 1	HOOK1	18	18	30.6	84.647	173.25			28.7517	28.7129	28.8682	28.5052	28.6251	28.3239	29.0453	28.976	28.8142	28.4862	28.4433	28.2353
O14530	Thioredoxin domain-containing protein 9	TXNDC9	5	5	28.8	26.534	44.932			27.0711	27.1984	27.1604	26.4969	26.8623	26.8385	26.673	26.8142	27.0609	NaN	NaN	26.3031
Q9NR09	Baculoviral IAP repeat-containing protein 6	BIRC6	34	33	12.6	530.25	102.51			28.6595	28.5898	28.5536	28.3494	28.5646	28.5646	29.0583	29.003	28.7864	28.1795	28.4433	28.5536
P04792	Heat shock protein beta-1	HSPB1	6	6	54.6	22.782	100.11			NaN	NaN	27.673	NaN	NaN	NaN	29.6251	29.0137	30.1115	NaN	28.6424	29.4413
Q14526	Hypermethylated in cancer 1 protein	HIC1	18	18	40.4	76.507	55.359			29.5862	28.8887	29.7162	29.8726	29.5969	30.1115	28.6389	28.5646	29.0864	27.9372	27.6527	28.8264
Q96TC7	Regulator of microtubule dynamics protein 3	RMDN3	7	7	22.6	52.118	16.756			27.2714	27.6595	27.1795	27.2803	27.4154	27.391	NaN	NaN	27.2714	NaN	26.5898	26.8504
P49902	Cytosolic purine 5-nucleotidase	NT5C2	14	14	45.6	64.969	36.764			29.5296	30.2308	30.2193	29.4532	30.1115	30.3196	28.7517	28.5609	28.8142	27.5165	28.3066	28.4862
P62736;P63267	Actin, aortic smooth muscle;Actin, gamma-enteric smooth muscle	ACTA2;ACTG2	23	1	70.6	42.009	3.2339			NaN	NaN	NaN	NaN	NaN	NaN	29.3828	28.8234	29.5844	NaN	NaN	28.7486
Q9Y6B6	GTP-binding protein SAR1b	SAR1B	8	5	66.7	22.41	28.699			29.1747	29.267	29.0813	28.9732	29.3153	29.2262	28.9977	29.0003	28.8019	NaN	28.0084	28.6898
Q15365	Poly(rC)-binding protein 1	PCBP1	17	14	84.8	37.497	323.31			34.0184	34.0017	33.87	33.9153	33.9153	33.8422	33.4458	33.3303	33.6629	33.015	32.362	33.2897
P08243	Asparagine synthetase [glutamine-hydrolyzing]	ASNS	24	24	50.6	64.369	123.7			31.5481	31.0084	31.3196	31.525	31.0283	31.1544	31.6285	31.3088	31.8571	30.9746	30.6881	31.4483
O60508	Pre-mRNA-processing factor 17	CDC40	9	9	18.5	65.521	21.05			27.0914	27.2262	27.2714	27.2353	27.141	27.2535	NaN	26.3811	NaN	NaN	25.8385	NaN
P23588	Eukaryotic translation initiation factor 4B	EIF4B	12	12	23.2	69.15	149.81			30.2308	30.1239	29.995	29.9814	29.7629	29.7911	30.1842	30.099	30.2869	29.114	29.7676	29.94
P07437	Tubulin beta chain	TUBB	26	5	71.6	49.67	77.218			34.5179	34.2897	34.3436	34.4334	34.6522	34.4146	34.8042	34.78	34.9763	33.3033	34.3698	34.8608
O14737	Programmed cell death protein 5	PDCD5	7	7	56	14.285	60.881			30.4629	30.1239	29.6881	30.0349	29.7864	29.5627	29.4727	28.9814	29.2216	NaN	28.8682	28.5052
P55011	Solute carrier family 12 member 2	SLC12A2	12	12	17.7	131.45	44.687			27.8858	28.3196	28.0609	27.341	28.17	27.9088	27.6527	27.3324	27.965	26.8741	27.5014	26.9428
Q15654	Thyroid receptor-interacting protein 6	TRIP6	21	21	74.6	50.287	181.7			30.9677	31.5203	31.6022	30.8385	31.2308	31.2647	30.8974	30.7533	31.4184	29.9539	30.5933	30.8608
Q71U36;P0DPH8;P0DPH7;Q6PEY2	Tubulin alpha-1A chain;Tubulin alpha-3E chain	TUBA1A;TUBA3E	32	1	81.8	50.135	42.112			31.9117	31.9295	31.8422	31.7252	31.9081	32.025	32.0864	31.9224	32.13	30.2869	31.6022	32.1084
Q14C86	GTPase-activating protein and VPS9 domain-containing protein 1	GAPVD1	19	19	21.4	164.98	207.98			27.3239	27.8564	28.0505	27.524	26.7645	27.9484	29.4862	29.3971	29.3346	28.49	29.2285	28.8081
Q9Y3R5	Protein dopey-2	DOPEY2	54	53	35.6	258.23	202.47			31.5889	31.5062	31.4871	31.7692	31.5109	31.6756	31.4823	31.325	31.5296	29.8785	31.1901	31.3088
Q14247	Src substrate cortactin	CTTN	22	22	42.5	61.585	323.31			31.7252	31.8571	31.6329	31.4823	31.781	31.5343	31.4384	31.3515	31.611	30.4234	30.94	31.3303
Q9BRT6	Protein LLP homolog	LLPH	3	3	29.5	15.225	4.9681			26.7895	27.189	27.2077	27.0813	27.341	26.7895	26.8385	NaN	27.0813	NaN	NaN	26.4362
Q9P0T7	Transmembrane protein 9	TMEM9	3	3	32.8	20.574	17.703			27.524	27.7708	27.8623	27.4473	27.8974	27.9372	27.2979	27.4862	NaN	NaN	27.1984	26.4409
Q9Y508	E3 ubiquitin-protein ligase RNF114	RNF114	7	7	51.8	25.694	32.364			29.4492	29.4976	29.4234	29.2625	29.1115	29.1747	27.976	27.965	27.976	NaN	27.4551	27.4314
Q9NR31	GTP-binding protein SAR1a	SAR1A	10	7	70.7	22.367	319.46			31.0349	31.5435	31.3724	31.0479	31.5156	31.4483	31.5933	31.4775	31.4678	29.8385	31.1604	31.5014
Q9H9E3	Conserved oligomeric Golgi complex subunit 4	COG4	9	9	16.7	89.082	16.336			NaN	27.1312	26.9316	NaN	NaN	26.5507	27.8203	27.2803	27.8799	NaN	NaN	27.1604
P11802	Cyclin-dependent kinase 4	CDK4	14	13	54.8	33.729	28.344			30.1842	30.196	30.099	29.7911	29.9259	29.8218	30.196	30.099	30.1842	29.7373	29.4551	29.6964
P41743	Protein kinase C iota type	PRKCI	7	7	19.3	68.262	177.68			29.003	29.0505	28.8142	28.5682	28.726	28.5052	28.4234	28.4073	28.5203	NaN	27.9316	NaN
Q8N6T3	ADP-ribosylation factor GTPase-activating protein 1	ARFGAP1	10	10	38.7	44.667	77.693			28.2891	28.3452	28.3239	27.9595	28.0813	28.1263	27.6663	27.5898	27.9031	NaN	NaN	27.2077
Q13951	Core-binding factor subunit beta	CBFB	5	5	28	21.508	44.491			28.1747	28.1747	28.1065	28.0813	27.8203	28.0349	27.5898	27.7958	28.1015	26.9977	NaN	27.5969
Q9NT62	Ubiquitin-like-conjugating enzyme ATG3	ATG3	7	7	29.6	35.864	11.984			27.4862	27.7453	27.5969	27.5682	27.5536	27.1984	27.2262	27.1507	27.3828	26.5595	26.7517	26.8858
O95235	Kinesin-like protein KIF20A	KIF20A	14	14	26.1	100.28	36.732			27.9484	27.141	26.5135	29.0164	27.2445	27.2625	NaN	NaN	26.53	NaN	NaN	26.0127
Q9NRL3	Striatin-4	STRN4	11	10	31.3	80.595	51.964			29.0164	29.2692	29.1065	28.8142	28.8564	28.9316	29.0111	29.0003	29.0557	28.3951	28.3992	28.6964
Q9BY44	Eukaryotic translation initiation factor 2A;Eukaryotic translation initiation factor 2A, N-terminally processed	EIF2A	16	16	45	64.989	41.235			28.5609	28.5682	28.7927	27.965	28.1937	28.5754	27.391	26.1757	27.7389	NaN	26.4041	26.9869
Q9NZL4	Hsp70-binding protein 1	HSPBP1	6	6	31.8	39.302	15.664			27.4629	27.611	27.2353	27.189	27.391	26.9869	26.8142	26.4938	26.6181	NaN	26.2002	26.0711
Q8WVJ2	NudC domain-containing protein 2	NUDCD2	4	4	42	17.676	21.387			28.0084	27.5463	27.4551	28.1065	NaN	27.5682	27.7064	27.2714	27.5609	27.2714	26.4154	27.2077
Q99590	Protein SCAF11	SCAF11	5	5	7.1	164.65	21.571			26.9088	26.4815	26.4862	26.3031	26.5075	26.3187	26.4122	NaN	26.5014	NaN	NaN	25.9473
Q99733	Nucleosome assembly protein 1-like 4	NAP1L4	11	9	41.1	42.823	176.37			29.9117	30.0479	30.0737	30.1115	30.1604	30.2647	30.9609	31.0864	31.1724	30.2308	30.5109	30.8901
Q9Y6G9	Cytoplasmic dynein 1 light intermediate chain 1	DYNC1LI1	18	17	49.3	56.578	105.09			30.4727	30.4629	30.5296	30.5573	30.362	30.4032	30.6285	30.6713	30.7373	30.1604	30.0737	30.2759
Q8TEX9	Importin-4	IPO4	17	17	23.8	118.71	51.434			28.8294	28.3787	28.5573	28.5933	28.1164	28.509	28.4976	28.6181	28.5203	28.141	28.0557	27.9146
Q96FX7	tRNA (adenine(58)-N(1))-methyltransferase catalytic subunit TRMT61A	TRMT61A	6	6	34.9	31.381	15.67			27.3324	27.2891	27.5609	27.17	27.0505	27.3494	26.6458	NaN	NaN	NaN	26.1391	NaN
Q92600	Cell differentiation protein RCD1 homolog	RQCD1	5	5	28.8	33.631	22.459			27.726	27.8019	27.4938	27.5969	27.3828	27.3324	27.8385	27.8203	27.9814	NaN	27.5014	27.2445
P49840	Glycogen synthase kinase-3 alpha	GSK3A	5	5	20.5	50.98	78.428			26.9977	26.965	27.1795	27.0505	26.7895	NaN	27.0401	27.2262	27.2445	NaN	NaN	26.673
Q9NPH2	Inositol-3-phosphate synthase 1	ISYNA1	12	12	35.8	61.067	69.527			NaN	NaN	NaN	NaN	NaN	NaN	31.7888	31.6501	31.3033	31.1544	31.08	31.0544
O00562	Membrane-associated phosphatidylinositol transfer protein 1	PITPNM1	11	11	16.5	134.85	28.599			26.515	NaN	NaN	26.6998	26.2856	NaN	26.9316	27.0813	26.6181	NaN	26.5195	26.2517
Q92598	Heat shock protein 105 kDa	HSPH1	46	43	65.6	96.864	323.31			33.4943	33.3828	32.8919	33.2478	32.995	32.5822	33.1052	33.0705	33.2478	32.8901	32.5686	32.4309
P62993	Growth factor receptor-bound protein 2	GRB2	7	7	34.1	25.206	34.742			29.0813	29.2602	29.0686	28.7927	28.7833	28.459	28.6355	28.4194	28.3324	NaN	27.9316	28.0084
Q15061	WD repeat-containing protein 43	WDR43	13	13	32.2	74.89	63.724			29.651	29.5147	29.6458	29.9539	29.362	29.5754	29.4804	29.3088	29.341	27.2353	29.4334	29.1628
Q9NYJ1	Cytochrome c oxidase assembly factor 4 homolog, mitochondrial	COA4	6	6	78.2	10.134	39.186			27.5463	27.4394	27.341	27.4785	27.1507	NaN	27.6181	NaN	27.9316	NaN	27.2535	27.3239
Q8TD16	Protein bicaudal D homolog 2	BICD2	9	9	17.7	93.532	44.106			25.6676	26.0793	25.4831	25.7619	NaN	NaN	26.1642	26.1546	26.0169	NaN	25.6181	NaN
Q00653	Nuclear factor NF-kappa-B p100 subunit;Nuclear factor NF-kappa-B p52 subunit	NFKB2	6	6	13.3	96.748	13.113			26.9428	27.1795	27.2353	26.9539	26.8385	26.9203	26.8264	NaN	27.0609	NaN	NaN	26.4504
Q9UGI8	Testin	TES	19	19	56.3	47.996	323.31			31.196	31.341	31.325	31.1361	31.4134	31.2647	31.1422	30.9814	31.611	29.9677	30.7129	31.3303
Q9H0W5	Coiled-coil domain-containing protein 8	CCDC8	11	11	41.3	59.374	120.55			28.9787	29.5646	29.49	28.8445	29.3557	29.3066	28.579	28.3324	28.632	27.604	28.1361	28.258
Q9P000	COMM domain-containing protein 9	COMMD9	5	5	39.4	21.819	96.726			27.2262	27.5536	27.2353	27.5609	27.6251	27.673	27.5463	27.9031	28.0137	27.0505	27.3153	27.604
O00629	Importin subunit alpha-3	KPNA4	10	8	38.8	57.886	178.3			29.267	29.2803	29.1819	29.0401	29.0479	29.0401	28.3494	28.6251	28.7389	27.976	28.217	28.0557
O95456	Proteasome assembly chaperone 1	PSMG1	6	6	34.4	32.854	12.527			29.0889	28.8858	29.019	28.6697	28.7325	28.8887	28.0453	27.8504	28.217	NaN	27.4473	27.6458
P16989	Y-box-binding protein 3	YBX3	11	6	54.8	40.089	32.4			28.2625	26.8974	NaN	27.4862	NaN	NaN	28.391	28.524	28.8682	28.267	27.6865	28.3109
Q9UHD1	Cysteine and histidine-rich domain-containing protein 1	CHORDC1	13	13	53.9	37.489	146.35			31.8119	31.9539	31.5664	31.7965	31.7211	31.2193	30.6544	30.7047	30.8157	29.8785	30.4334	30.3303
Q4J6C6	Prolyl endopeptidase-like	PREPL	10	10	23.8	83.926	30.842			26.8264	26.9977	26.8623	26.5536	26.512	26.5754	27.391	27.6527	27.6931	NaN	27.0296	27.1507
Q10570	Cleavage and polyadenylation specificity factor subunit 1	CPSF1	20	20	20.3	160.88	58.565			29.027	28.6798	28.9787	29.0217	28.6898	28.8623	28.4274	28.5609	28.7096	26.5075	28.3324	28.6458
P48163	NADP-dependent malic enzyme	ME1	24	24	60.7	64.149	323.31			32.1115	32.4134	32.6501	32.1052	32.5777	32.6329	29.8218	29.8339	30.1239	28.2759	29.6058	29.9677
Q9UPY3	Endoribonuclease Dicer	DICER1	42	42	33.5	218.68	209.55			29.9117	29.9539	29.8279	29.8309	29.7849	29.7786	30.1239	29.8218	30.1239	29.1604	29.6163	29.7895
Q9UNF0	Protein kinase C and casein kinase substrate in neurons protein 2	PACSIN2	9	9	23.5	55.738	95.232			28.8623	28.7988	28.4746	28.4032	28.4394	28.2216	28.3662	28.4274	28.4354	27.6251	28.1065	28.003
Q13049	E3 ubiquitin-protein ligase TRIM32	TRIM32	4	4	8.3	71.988	6.5714			NaN	NaN	NaN	NaN	NaN	NaN	26.0691	NaN	NaN	NaN	25.5926	NaN
Q15758	Neutral amino acid transporter B(0)	SLC1A5	11	11	22.2	56.598	152.94			31.7652	32.2019	32.1115	31.6501	31.8309	31.7692	31.8157	31.8608	31.9609	31.6242	31.2591	31.2924
Q92536	Y+L amino acid transporter 2	SLC7A6	2	2	8.7	56.827	10.861			27.3066	27.604	NaN	27.1312	26.632	26.6998	26.7129	26.632	26.9088	NaN	26.3795	26.1738
O60488	Long-chain-fatty-acid--CoA ligase 4	ACSL4	9	8	20.3	79.187	29.757			27.1604	NaN	NaN	27.0711	NaN	NaN	27.2445	27.1795	26.5135	NaN	26.5404	NaN
Q5SW79	Centrosomal protein of 170 kDa	CEP170	18	18	19.6	175.29	147.51			28.7676	28.5536	28.3536	28.5536	28.5862	28.17	28.1747	28.1556	28.3153	27.8504	27.8564	27.4938
Q9Y6M7	Sodium bicarbonate cotransporter 3	SLC4A7	3	3	3.8	136.04	8.9652			26.4769	25.3578	25.5869	26.1075	NaN	25.0148	26.4661	26.673	26.2021	NaN	NaN	25.9869
Q9NW68	BSD domain-containing protein 1	BSDC1	4	4	15.1	47.163	9.2098			26.53	26.8741	NaN	26.4938	26.4598	26.4551	27.17	27.0914	27.0401	NaN	NaN	26.632
P02751	Fibronectin;Anastellin;Ugl-Y1;Ugl-Y2;Ugl-Y3	FN1	18	18	13.4	262.62	106.54			27.4629	28.2714	27.7129	27.4314	28.5426	28.2759	27.6663	27.524	27.6798	26.2353	27.604	27.2979
P26358	DNA (cytosine-5)-methyltransferase 1	DNMT1	17	17	14.1	183.16	33.027			27.6595	27.0609	27.5682	27.217	27.2445	27.2445	27.8564	28.1115	28.2353	27.5315	27.632	27.6527
P68371	Tubulin beta-4B chain	TUBB4B	29	1	75.7	49.83	323.31			36.9197	36.9417	36.9197	36.9848	37.1165	36.9308	37.0673	36.8746	37.1735	35.9175	36.5032	37.0773
P14735	Insulin-degrading enzyme	IDE	34	34	42.4	117.97	114.44			31.2019	31.341	31.4032	31.015	31.2979	31.3776	30.6798	30.8309	30.7129	30.0479	30.362	30.3828
O15027	Protein transport protein Sec16A	SEC16A	28	28	23	251.89	314.15			29.2308	29.5296	29.3869	29.1015	29.2647	29.2353	29.6146	29.2535	29.8294	29.1937	28.9372	29.2123
Q9NUQ8	ATP-binding cassette sub-family F member 3	ABCF3	17	17	34.8	79.744	48.889			29.8726	29.84	30.1115	29.8872	29.8901	29.9814	29.8112	29.4532	29.747	28.7613	29.2353	29.5407
Q96B36	Proline-rich AKT1 substrate 1	AKT1S1	3	3	22.7	27.383	12.224			26.604	26.3307	26.6595	26.4754	26.4629	26.1194	26.5492	26.8142	26.4409	26.3307	NaN	25.9383
P68363	Tubulin alpha-1B chain	TUBA1B	32	0	81.8	50.151	323.31			36.8631	36.9526	36.8162	36.9634	36.9634	36.8281	37.1165	37.0572	37.2724	36.1049	36.6787	37.1068
Q9Y6D6	Brefeldin A-inhibited guanine nucleotide-exchange protein 1	ARFGEF1	19	11	15.2	208.76	104.42			27.1604	27.1507	27.0084	27.341	26.8504	26.9869	28.7802	28.8385	28.2625	26.4202	28.8324	28.3869
Q04323	UBX domain-containing protein 1	UBXN1	11	11	49.5	33.325	224.01			30.9539	30.5481	30.7292	30.7129	30.5109	30.7211	30.5014	29.8901	30.5296	29.995	29.5555	30.0217
P26992	Ciliary neurotrophic factor receptor subunit alpha	CNTFR	4	4	19.4	40.633	18.335			27.6458	NaN	27.5682	27.9146	28.0914	27.9259	27.3239	NaN	NaN	NaN	NaN	26.8741
Q9GZT4	Serine racemase	SRR	5	5	24.1	36.566	11.515			26.3528	26.228	26.7517	26.5898	26.4862	26.6181	25.9933	NaN	26.0793	NaN	25.2426	25.8528
Q14432	cGMP-inhibited 3,5-cyclic phosphodiesterase A	PDE3A	24	23	36.4	124.98	178.53			30.5933	30.5754	30.8309	30.6629	30.5573	30.7613	30.5109	30.6458	30.6713	29.6848	30.0217	30.6022
Q04637	Eukaryotic translation initiation factor 4 gamma 1	EIF4G1	49	44	44	175.49	323.31			33.6307	33.5527	33.4581	33.3436	33.1828	33.1146	33.4581	33.4334	33.6198	33.1529	32.9259	33.0689
P61313	60S ribosomal protein L15	RPL15	9	9	42.2	24.146	17.258			32.0217	31.933	31.8719	32.0544	31.9574	31.6329	31.8755	31.7088	31.7731	30.6964	31.3568	31.7573
Q96C90	Protein phosphatase 1 regulatory subunit 14B	PPP1R14B	5	5	57.8	15.911	184.3			29.8504	29.7613	29.2331	29.8799	29.4629	29.3515	29.1676	28.673	29.9677	29.6764	27.7958	28.673
P04183	Thymidine kinase, cytosolic	TK1	11	11	62.4	25.468	69.331			30.2869	30.341	30.3303	30.4727	30.4727	30.4234	29.7895	29.6964	30.1724	29.4746	29.4823	29.3848
P30622	CAP-Gly domain-containing linker protein 1	CLIP1	15	12	14.5	162.24	30.974			27.5682	27.6931	27.8623	27.1214	27.6458	27.5315	27.9484	28.141	28.0762	NaN	27.6663	27.5463
P15090	Fatty acid-binding protein, adipocyte	FABP4	12	12	75.8	14.719	323.31			35.2265	35.3336	35.0101	35.3101	35.5325	35.2724	34.6033	34.5867	34.7849	33.5179	33.9417	34.8422
Q9H773	dCTP pyrophosphatase 1	DCTPP1	7	7	52.9	18.681	36.931			29.6093	29.1015	28.8858	29.6355	29.1842	28.9977	29.3196	29.4765	29.4012	28.4032	29.2007	29.1263
Q4V328	GRIP1-associated protein 1	GRIPAP1	14	14	28.4	96.004	100.55			27.3578	27.673	27.5389	27.2979	27.5536	27.4551	27.2714	27.3239	27.1507	NaN	26.8019	NaN
P06493	Cyclin-dependent kinase 1	CDK1	18	16	70	34.095	106.08			31.5343	31.4581	31.4334	31.5481	31.5109	31.4334	30.8157	30.8081	31.015	30.1361	30.4234	30.7047
Q9HB71	Calcyclin-binding protein	CACYBP	14	14	68.4	26.21	323.31			33.2897	33.1331	32.8755	33.3956	33.0067	32.8403	32.5389	32.5366	32.5822	31.9435	32.1901	32.1842
O00560	Syntenin-1	SDCBP	10	10	57.4	32.444	212.75			30.6629	30.9117	30.8081	31.1544	31.1664	31.0864	31.0544	31.0283	31.2422	30.6198	30.8157	30.5664
Q641Q2	WASH complex subunit FAM21A	FAM21A	20	5	28.1	147.18	241.47			28.7096	28.7549	28.579	28.6458	28.8711	28.8945	28.5203	28.7096	28.7195	28.1361	27.8445	28.5646
P57678	Gem-associated protein 4	GEMIN4	9	9	14	120.04	95.756			28.55	28.5278	28.5014	28.3109	28.2399	28.217	28.003	28.1795	28.0137	27.4473	27.7517	27.673
Q9Y3P9	Rab GTPase-activating protein 1	RABGAP1	10	9	13.3	121.74	36.279			27.1312	27.6251	27.4234	27.1604	27.4154	27.1015	28.2714	28.1312	28.2759	27.673	28.0401	27.6181
P54709	Sodium/potassium-transporting ATPase subunit beta-3	ATP1B3	8	8	38.7	31.512	25.644			29.8711	29.6527	29.3131	29.5481	29.3452	29.0737	29.1676	29.4113	29.21	28.9031	28.7486	28.8324
Q96HP0	Dedicator of cytokinesis protein 6	DOCK6	38	36	29.4	229.56	80.21			29.1263	28.5426	28.673	28.9428	28.4113	28.5754	29.995	29.726	29.8697	29.6646	29.4012	29.1866
P61758	Prefoldin subunit 3	VBP1	7	7	37.6	22.658	54.83			29.2262	29.1361	29.1604	29.2123	28.8974	28.9814	28.7421	28.805	28.6424	28.0762	28.4314	28.3494
O00566	U3 small nucleolar ribonucleoprotein protein MPP10	MPHOSPH10	5	5	15.3	78.863	105.54			28.0813	28.1652	28.003	28.1795	27.8142	27.8445	27.7958	27.604	28.1842	NaN	27.2262	27.6389
P42566	Epidermal growth factor receptor substrate 15	EPS15	8	8	12.8	98.655	47.478			26.726	26.7389	NaN	26.8385	NaN	NaN	27.8682	27.4314	27.1795	NaN	26.8504	27.2891
P49327	Fatty acid synthase;[Acyl-carrier-protein] S-acetyltransferase;[Acyl-carrier-protein] S-malonyltransferase;3-oxoacyl-[acyl-carrier-protein] synthase;3-oxoacyl-[acyl-carrier-protein] reductase;3-hydroxyacyl-[acyl-carrier-protein] dehydratase;Enoyl-[acyl-carrier-protein] reductase;Oleoyl-[acyl-carrier-protein] hydrolase	FASN	127	127	68.1	273.42	323.31			36.3763	35.7528	35.8516	36.6253	35.8974	35.9063	36.5412	36.4913	36.1281	35.9912	36.0872	35.8018
Q9Y6W3	Calpain-7	CAPN7	5	5	10.5	92.651	13.076			NaN	NaN	26.5507	NaN	NaN	NaN	27.6998	27.4154	27.7195	NaN	NaN	27.1795
Q9Y6C2	EMILIN-1	EMILIN1	33	33	53.6	106.69	323.31			32.7413	32.2106	31.9081	32.8023	31.8196	31.5618	32.6198	32.5709	32.2979	32.4284	32.0864	31.5664
O95347	Structural maintenance of chromosomes protein 2	SMC2	22	22	23.5	135.65	108.96			29.5463	29.3346	29.2308	29.3515	29.391	29.3578	28.8264	28.9117	29.1676	27.632	28.8504	28.8445
O95486	Protein transport protein Sec24A	SEC24A	15	15	19.7	119.75	28.686			28.258	28.4154	28.4194	28.141	28.1312	28.0813	28.632	28.5862	28.2625	27.3992	28.3787	28.2535
Q7L311	Armadillo repeat-containing X-linked protein 2	ARMCX2	3	3	15.8	65.683	10.743			NaN	NaN	NaN	25.1642	NaN	NaN	26.5135	26.2445	26.3083	26.1095	25.7208	NaN
Q13188	Serine/threonine-protein kinase 3;Serine/threonine-protein kinase 3 36kDa subunit;Serine/threonine-protein kinase 3 20kDa subunit	STK3	15	11	45.4	56.3	33.676			28.5898	28.8142	28.6798	28.5165	28.5862	28.5128	28.5754	28.4976	28.3109	27.673	28.4473	27.8623
P46976	Glycogenin-1	GYG1	9	9	26.3	39.383	98.796			28.4785	28.7581	28.7227	28.4032	28.55	28.632	28.141	28.2216	28.0296	NaN	27.611	27.7833
P13807	Glycogen [starch] synthase, muscle	GYS1	7	7	17	83.785	42.704			27.8445	28.2353	28.4394	27.5536	28.217	28.4194	28.0557	27.9428	27.6595	NaN	27.5014	27.4314
Q86TU7	Histone-lysine N-methyltransferase setd3	SETD3	6	6	13.1	67.256	21.08			27.509	27.5754	27.6181	27.4394	27.141	27.1312	27.3239	27.1015	26.9428	NaN	NaN	26.6998
Q15637	Splicing factor 1	SF1	15	15	33.6	68.329	96.623			30.4727	30.3515	30.3515	30.6285	30.4234	30.2647	30.4134	30.2535	30.3196	29.604	29.7629	30.2647
P41227	N-alpha-acetyltransferase 10	NAA10	9	9	63	26.458	116.58			29.8814	29.7864	29.8534	29.6948	29.5352	29.7405	29.5014	29.3153	29.5109	28.9732	28.8173	29.2376
Q9NZN5	Rho guanine nucleotide exchange factor 12	ARHGEF12	10	10	11.9	173.23	86.102			26.574	26.509	26.7389	26.7389	26.726	26.604	27.5826	27.2979	27.5389	NaN	26.976	27.1312
Q9Y5Y2	Cytosolic Fe-S cluster assembly factor NUBP2	NUBP2	6	6	41.7	28.825	24.079			28.0401	NaN	27.8682	28.1652	28.1263	27.976	28.3494	28.2123	28.2123	27.3662	27.7517	28.249
Q13200	26S proteasome non-ATPase regulatory subunit 2	PSMD2	46	46	62.1	100.2	323.31			33.933	33.9933	33.9933	33.5179	33.6415	33.5867	33.3568	33.4209	33.5412	33.0283	32.901	33.1115
O43237	Cytoplasmic dynein 1 light intermediate chain 2	DYNC1LI2	12	11	37.2	54.099	107.4			29.2445	29.4274	29.3452	29.267	29.4354	29.1189	29.9117	29.8799	29.7833	29.4314	29.5426	29.3346
Q99622	Protein C10	C12orf57	5	5	63.5	13.178	14.472			27.5389	27.7581	27.7581	27.341	27.3578	27.4707	28.0137	28.1263	27.8741	27.5754	27.5826	27.5969
Q15643	Thyroid receptor-interacting protein 11	TRIP11	36	36	26.8	227.58	147.24			29.6337	29.8279	29.9259	29.7973	29.94	30.1604	29.0322	29.0057	28.8711	28.4473	28.55	28.6527
Q96T76	MMS19 nucleotide excision repair protein homolog	MMS19	21	21	37.4	113.29	139.39			29.5555	29.1842	29.0686	29.3515	29.3388	29.1604	29.7973	29.8324	29.579	28.8019	29.604	29.4374
O75153	Clustered mitochondria protein homolog	CLUH	18	18	23.1	146.67	61.403			28.3578	28.5862	28.6285	27.9539	27.7833	27.7708	28.0296	27.9372	27.9428	27.5536	NaN	NaN
P08195	4F2 cell-surface antigen heavy chain	SLC3A2	17	17	33.3	67.993	152.93			31.1901	31.2759	30.7849	30.995	30.8234	30.7129	31.0544	31.13	31.2077	30.7453	30.6544	30.7533
P13639	Elongation factor 2	EEF2	60	59	73.1	95.337	323.31			36.4913	36.4256	36.4225	36.2914	36.1791	36.1547	36.099	35.9613	36.0892	35.6629	35.6307	35.6116
O43679	LIM domain-binding protein 2	LDB2	2	1	8.6	42.793	6.7536			NaN	NaN	NaN	NaN	NaN	NaN	26.6458	NaN	26.9428	NaN	NaN	26.3861
Q9BVL4	Selenoprotein O	SELO	4	4	10.8	73.488	9.2191			NaN	NaN	NaN	NaN	NaN	NaN	NaN	26.4154	NaN	NaN	NaN	26.002
Q96J02	E3 ubiquitin-protein ligase Itchy homolog	ITCH	8	8	12.3	102.8	13.307			26.239	26.7517	26.8858	25.9716	26.5624	26.6181	26.7771	26.632	26.4457	NaN	NaN	26.2114
Q13177	Serine/threonine-protein kinase PAK 2;PAK-2p27;PAK-2p34	PAK2	15	10	51.7	58.042	178.36			30.099	30.1115	30.1483	30.0479	30.1604	30.099	29.7195	29.4234	29.5389	28.805	29.4629	29.1189
Q96K76	Ubiquitin carboxyl-terminal hydrolase 47	USP47	30	30	32.7	157.31	148.35			28.4274	28.1652	28.0505	28.1747	28.1984	28.3239	29.2467	29.1795	29.1795	28.49	28.9869	28.8474
O43752	Syntaxin-6	STX6	7	7	43.1	29.176	61.007			27.5969	27.5826	27.5463	27.7771	27.7895	27.4938	27.5609	27.611	27.4394	NaN	NaN	27.1312
Q96F07	Cytoplasmic FMR1-interacting protein 2	CYFIP2	11	5	12.4	148.4	9.603			NaN	NaN	NaN	26.5014	NaN	NaN	26.3612	26.417	25.8264	26.0359	25.7208	25.654
P0DN76;Q01081	Splicing factor U2AF 35 kDa subunit	U2AF1	7	7	31.7	27.872	21.998			29.94	29.9539	29.94	30.1483	29.9677	30.0084	29.588	29.4532	29.5109	27.9203	29.0505	29.788
O14981	TATA-binding protein-associated factor 172	BTAF1	19	19	17.6	206.89	82.685			27.8019	27.9869	28.0084	27.8974	27.9203	28.1556	27.8203	27.7064	27.5826	NaN	27.0711	27.4938
P54687	Branched-chain-amino-acid aminotransferase, cytosolic	BCAT1	8	8	34.7	42.966	39.852			30.2647	30.2193	30.1361	30.2647	30.2759	30.1483	30.393	30.2647	30.9117	30.2647	29.7942	30.3088
Q01970	1-phosphatidylinositol 4,5-bisphosphate phosphodiesterase beta-3	PLCB3	17	17	19.6	138.8	68.931			28.6798	28.604	28.4551	28.3992	28.3869	28.3745	28.6458	28.4512	28.3662	27.8858	28.0813	28.2625
Q14019	Coactosin-like protein	COTL1	6	6	50.7	15.945	24.95			30.3303	30.0084	29.8065	30.4919	30.1483	29.4334	30.4134	30.5203	30.1361	28.4746	30.4727	30.2308
Q15056	Eukaryotic translation initiation factor 4H	EIF4H	8	8	33.1	27.385	81.543			30.9045	31.2814	30.7927	30.5664	30.5389	30.6964	30.4032	30.3515	30.2193	30.1842	29.4957	30.0084
P28340	DNA polymerase delta catalytic subunit	POLD1	22	22	30.4	123.63	41.05			27.7708	27.0711	27.6527	28.1312	27.3239	27.9539	28.1747	28.3536	28.0137	26.3811	27.5969	28.5826
O95232	Luc7-like protein 3	LUC7L3	9	9	24.5	51.466	102.78			30.5573	30.6285	30.6372	30.5664	30.6022	30.6881	30.1115	30.2193	30.4234	29.5033	29.9677	30.0349
P68104;Q5VTE0	Elongation factor 1-alpha 1;Putative elongation factor 1-alpha-like 3	EEF1A1;EEF1A1P5	31	18	75.3	50.14	323.31			37.3568	37.3972	37.2461	37.0266	37.192	37.0059	36.9634	36.8399	37.0266	36.5839	36.4733	36.5698
Q8IZL8	Proline-, glutamic acid- and leucine-rich protein 1	PELP1	14	14	21.2	119.7	95.345			28.6458	28.4629	28.5128	28.7486	28.3452	28.5933	29.1556	28.8203	29.267	27.4629	28.877	29.2123
Q9H3R5	Centromere protein H	CENPH	4	4	26.3	28.481	29.32			26.5029	26.3695	26.1757	26.673	26.2445	26.0105	NaN	NaN	26.5075	NaN	NaN	26.1055
Q13155	Aminoacyl tRNA synthase complex-interacting multifunctional protein 2	AIMP2	7	7	39.4	35.348	98.45			30.0609	30.2193	30.2077	30.1361	30.0349	29.8019	30.099	30.0349	30.2308	29.3044	30.1115	29.6578
O95352	Ubiquitin-like modifier-activating enzyme ATG7	ATG7	11	11	25.7	77.959	43.232			27.189	27.0505	27.0296	27.391	27.0711	27.4551	28.1604	28.1263	27.9088	27.0084	27.9316	27.9031
Q13033	Striatin-3	STRN3	9	8	14.8	87.208	15.002			27.4862	27.604	27.7833	27.2891	27.3992	27.7833	27.7771	27.7453	27.4938	NaN	26.965	27.5389
P50552	Vasodilator-stimulated phosphoprotein	VASP	17	17	45.5	39.829	144.23			30.5844	30.8829	30.9746	30.341	30.7129	30.8234	30.6198	30.6372	31.1052	30.2647	30.393	30.5573
Q5VW36	Focadhesin	FOCAD	12	12	11	200.07	41.595			27.3745	27.3066	26.6998	27.1015	27.141	27.0296	27.8799	27.7195	27.8203	27.17	27.604	27.4473
P08294	Extracellular superoxide dismutase [Cu-Zn]	SOD3	4	4	21.2	25.851	19.225			NaN	27.217	27.2979	NaN	27.1115	27.1115	27.1604	26.632	27.3324	NaN	26.673	NaN
Q15417	Calponin-3	CNN3	15	14	62.6	36.413	296.55			32.3383	32.715	32.5573	31.8937	32.5481	32.2422	30.2535	30.2759	30.8829	29.7723	29.9677	30.4919
Q9H8S9;Q7L9L4	MOB kinase activator 1A;MOB kinase activator 1B	MOB1A;MOB1B	5	5	25.5	25.079	16.273			28.6216	28.8234	28.4473	28.3662	28.2535	28.2891	28.5862	28.6216	28.8711	28.6005	28.4746	27.6998
Q2M2I8	AP2-associated protein kinase 1	AAK1	17	16	26.4	103.88	208.3			28.5754	28.8324	28.8829	28.4274	28.6216	28.7064	28.7771	28.6998	28.8829	28.2759	28.3745	28.5315
Q12841	Follistatin-related protein 1	FSTL1	10	10	39.3	34.985	257.62			28.5718	29.4354	28.9344	27.9203	28.8142	28.4433	27.141	27.1604	27.141	NaN	26.7517	NaN
Q16643	Drebrin	DBN1	24	24	49.6	71.428	304.64			32.9797	32.9539	32.9171	32.8366	32.8955	32.7849	32.9081	33.0101	33.1783	32.7047	32.4259	32.7888
O15372	Eukaryotic translation initiation factor 3 subunit H	EIF3H	17	17	62.2	39.93	38.779			30.393	30.362	30.341	30.1483	30.1604	30.1361	30.1361	30.0217	30.0217	29.2123	29.7195	29.995
P30520	Adenylosuccinate synthetase isozyme 2	ADSS	15	15	44.3	50.097	91.505			31.7533	31.341	31.2814	31.6066	31.1052	30.94	31.3568	31.4234	31.2869	31.1422	30.933	30.8081
Q92609	TBC1 domain family member 5	TBC1D5	4	4	9.7	89.003	28.727			NaN	NaN	NaN	NaN	NaN	NaN	26.5359	NaN	26.6595	NaN	NaN	26.2077
Q5SRE5	Nucleoporin NUP188 homolog	NUP188	12	12	8.7	196.04	22.079			27.3324	27.2891	26.9977	27.1015	26.8623	26.8504	27.7581	27.8799	28.0505	NaN	27.4938	27.5315
Q9UPY8	Microtubule-associated protein RP/EB family member 3	MAPRE3	7	5	33.1	31.982	29.35			26.8504	27.2803	27.0609	26.2021	27.0505	26.8504	26.726	NaN	26.8858	NaN	NaN	26.4202
Q8N543	Prolyl 3-hydroxylase OGFOD1	OGFOD1	12	12	32.3	63.245	44.132			28.4234	28.0813	28.2847	28.3992	27.7895	27.9705	28.0243	27.7453	28.1459	27.7833	27.1795	27.7517
Q0VDF9	Heat shock 70 kDa protein 14	HSPA14	9	9	28.5	54.794	37.002			28.391	28.3951	28.189	28.2077	28.3828	28.3828	28.3662	28.1747	28.5052	NaN	27.6798	28.2123
Q9UHB9	Signal recognition particle subunit SRP68	SRP68	23	23	49.8	70.729	279.81			30.8829	31.0017	31.0414	30.9539	30.9539	31.0414	30.9609	30.8081	30.8608	29.7517	30.6544	30.8608
Q9UNH7	Sorting nexin-6;Sorting nexin-6, N-terminally processed	SNX6	18	18	44.6	46.648	195.36			28.9287	28.9595	29.2007	28.8858	29.196	29.1866	28.5573	28.3066	28.5609	27.8203	27.9259	28.4629
Q9Y617	Phosphoserine aminotransferase	PSAT1	21	21	70.5	40.422	209.82			31.4678	31.3463	31.4433	31.3724	31.2365	31.4433	32.9045	32.8328	32.6394	32.333	32.648	32.2365
Q96SZ5	2-aminoethanethiol dioxygenase	ADO	5	5	33.7	29.751	10.02			26.2679	26.2589	25.9672	26.1449	25.8552	25.6431	NaN	26.604	26.3014	NaN	26.2535	25.8764
P04075	Fructose-bisphosphate aldolase A	ALDOA	33	28	86.8	39.42	323.31			35.3403	35.4943	35.4853	35.327	35.515	35.4396	35.1791	35.0832	35.0911	34.3436	34.9242	34.8792
P83916	Chromobox protein homolog 1	CBX1	7	6	57.3	21.418	107.19			28.267	28.2759	28.3282	28.5128	28.4314	28.3066	28.2308	28.1459	28.3109	NaN	NaN	27.8504
Q9Y450	HBS1-like protein	HBS1L	18	18	35.2	75.472	69.235			30.0737	29.94	29.8623	29.8843	29.8127	29.8549	29.5754	29.7692	29.8385	29.4842	29.4334	29.1115
Q9Y2Z0	Suppressor of G2 allele of SKP1 homolog	SUGT1	13	13	43.6	41.024	36.255			30.0864	29.7292	29.5352	29.94	29.6544	29.4881	29.9259	29.6407	29.9259	NaN	29.2957	29.6005
Q9UNF1	Melanoma-associated antigen D2	MAGED2	27	26	48.7	64.953	323.31			32.0381	32.2106	32.2647	32.0576	32.1753	32.1842	31.8081	31.9224	31.8422	31.6544	31.4134	31.362
P27361	Mitogen-activated protein kinase 3	MAPK3	12	8	41.4	43.135	31.521			28.9146	28.4154	28.1459	29.196	29.066	28.7421	29.7942	29.8474	29.5987	28.8081	29.5278	29.6527
Q9UBB6	Neurochondrin	NCDN	14	14	29.5	78.863	27.861			26.8974	26.8974	27.1604	26.6595	NaN	NaN	27.7517	27.7645	27.5165	27.6998	27.1312	26.976
O14562	Ubiquitin domain-containing protein UBFD1	UBFD1	4	4	18.8	33.382	49.294			27.0914	27.7325	NaN	NaN	27.8445	27.5826	28.0401	28.1361	27.9031	NaN	27.6527	NaN
Q9BTE3	Mini-chromosome maintenance complex-binding protein	MCMBP	21	21	44.1	72.979	162.09			29.9539	29.9117	29.6128	29.7942	29.3023	29.3807	29.1819	28.8653	29.1984	27.2891	29.1189	29.0965
O15514	DNA-directed RNA polymerase II subunit RPB4	POLR2D	5	5	54.2	16.311	10.809			26.7895	26.7129	26.726	26.7129	26.6998	27.0505	26.7645	26.7771	26.5898	NaN	NaN	26.3393
P04350	Tubulin beta-4A chain	TUBB4A	27	3	74.1	49.585	81.31			29.3869	29.0164	29.4473	29.3745	29.3174	29.1913	29.389	28.9841	29.4154	28.1842	28.9231	29.3683
Q96BN8	Ubiquitin thioesterase otulin	OTULIN	9	9	43.5	40.262	22.318			28.6458	28.5536	28.3828	28.267	28.4274	28.3452	28.6561	28.4823	28.5898	27.8445	28.3452	28.3787
Q14558	Phosphoribosyl pyrophosphate synthase-associated protein 1	PRPSAP1	9	8	39	39.393	62.937			28.6898	28.6998	28.6798	28.7927	28.7486	28.7864	28.9146	28.9428	28.8623	28.4785	28.4823	28.6458
P10644	cAMP-dependent protein kinase type I-alpha regulatory subunit;cAMP-dependent protein kinase type I-alpha regulatory subunit, N-terminally processed	PRKAR1A	16	16	48	42.981	78.368			30.1361	30.5664	30.6198	29.9539	30.0217	30.1361	29.4842	29.2285	29.196	29.3473	28.6527	28.7162
Q96T37	Putative RNA-binding protein 15	RBM15	10	10	16	107.19	38.002			27.6458	27.7064	27.7958	27.976	27.9259	28.0505	27.2625	NaN	27.5463	NaN	NaN	27.0401
Q92626	Peroxidasin homolog	PXDN	37	37	47.2	165.27	253.11			30.8974	30.8385	31.0217	30.8829	30.8829	30.9814	30.0084	29.6848	29.94	29.1556	29.4571	29.8564
O95081	Arf-GAP domain and FG repeat-containing protein 2	AGFG2	5	5	22.7	48.962	37.853			28.1556	27.5609	27.9705	28.3023	27.7708	27.1984	28.5933	28.604	28.6798	28.0813	28.2979	28.391
Q8NEZ5	F-box only protein 22	FBXO22	9	9	30	44.508	18.573			27.7453	27.3578	27.391	28.1747	27.4073	27.3239	27.2077	26.965	27.3494	NaN	26.2481	27.2262
Q96FN4	Copine-2	CPNE2	7	6	19.3	61.189	23.185			27.4862	27.1984	27.189	27.2535	27.1507	27.3066	27.6798	27.8799	27.5898	NaN	27.2979	27.4154
Q16513	Serine/threonine-protein kinase N2	PKN2	12	12	21.3	112.03	34.271			27.0711	27.4234	27.4473	27.5609	26.9316	27.4629	26.4536	27.0609	NaN	NaN	NaN	26.4234
Q6P582;Q6NZ67	Mitotic-spindle organizing protein 2A;Mitotic-spindle organizing protein 2B	MZT2A;MZT2B	4	4	39.9	16.22	12.906			25.7286	NaN	25.3204	25.433	25.3101	25.3066	26.217	25.7312	25.9495	NaN	NaN	25.6181
Q13643	Four and a half LIM domains protein 3	FHL3	12	12	57.1	31.192	144.5			30.0217	30.2422	30.4433	29.7708	30.0737	30.099	30.0609	30.196	30.5573	29.4093	29.7645	30.4234
Q9UGH3	Solute carrier family 23 member 2	SLC23A2	5	5	11.8	70.336	10.797			NaN	27.1604	NaN	27.4938	27.1507	NaN	27.9539	28.1065	28.9512	NaN	27.4073	28.49
P35606	Coatomer subunit beta	COPB2	39	39	67.5	102.49	323.31			32.7573	32.8119	32.7333	32.5754	32.7672	32.6022	33.3303	33.2478	33.3436	32.9591	32.8865	33.0034
Q15386	Ubiquitin-protein ligase E3C	UBE3C	14	14	21.3	123.92	57.427			27.3992	27.7645	27.6389	27.509	27.5898	27.7581	28.0711	27.8324	27.6595	NaN	27.2891	27.6931
Q02878	60S ribosomal protein L6	RPL6	16	16	46.2	32.728	138.72			33.3698	33.2336	33.3033	33.3303	33.3169	33.2033	33.0848	33.2033	33.4209	32.333	33.0848	33.1068
Q5GLZ8	Probable E3 ubiquitin-protein ligase HERC4	HERC4	9	9	15	118.56	27.02			27.0914	27.2891	27.0914	27.141	27.189	27.217	28.0813	28.0762	27.632	27.1015	27.5754	27.9539
P30508;P30505;Q9TNN7;Q29960;Q07000;Q95604;P30501	HLA class I histocompatibility antigen, Cw-12 alpha chain;HLA class I histocompatibility antigen, Cw-8 alpha chain;HLA class I histocompatibility antigen, Cw-5 alpha chain;HLA class I histocompatibility antigen, Cw-16 alpha chain;HLA class I histocompatibility antigen, Cw-15 alpha chain;HLA class I histocompatibility antigen, Cw-17 alpha chain;HLA class I histocompatibility antigen, Cw-2 alpha ch…	HLA-C	10	0	41.8	40.885	138.17			NaN	NaN	NaN	NaN	NaN	NaN	28.8081	27.3992	26.8974	NaN	28.0453	26.8974
Q63HN8	E3 ubiquitin-protein ligase RNF213	RNF213	49	49	15.3	591.4	77.542			28.9088	28.8829	28.7927	28.8324	28.7517	28.8415	30.0349	30.0737	29.4862	29.2007	29.8504	29.4649
P61513	60S ribosomal protein L37a	RPL37A	3	3	41.3	10.275	21.029			29.4174	29.3869	29.55	29.4842	29.6646	29.4957	28.8887	29.2692	29.3515	27.3153	28.5969	29.6713
Q9NR46	Endophilin-B2	SH3GLB2	9	9	30.1	43.973	27.682			26.6998	26.3083	26.7517	26.7389	26.632	26.3101	27.4551	27.2625	27.2803	26.4676	26.976	27.3578
Q9NQC3	Reticulon-4	RTN4	10	10	20	129.93	114.43			32.5799	32.4159	32.3646	32.4083	32.4083	32.2048	32.225	31.9916	32.4108	31.9882	31.6671	31.9153
Q14CX7	N-alpha-acetyltransferase 25, NatB auxiliary subunit	NAA25	15	15	20.7	112.29	25.301			27.9031	27.976	28.0762	27.8504	27.8142	27.8858	28.0453	27.8385	27.726	27.3239	27.6931	27.5165
Q14141	Septin-6	2020-09-06	11	6	42.6	49.716	323.31			29.3088	29.7629	29.94	29.2913	29.5165	30.0349	29.2376	29.3196	29.4842	28.7802	29.158	29.027
Q5VT52	Regulation of nuclear pre-mRNA domain-containing protein 2	RPRD2	15	15	19.2	156.02	87.089			27.7833	27.6181	27.5682	27.5826	27.391	27.5969	27.6527	NaN	28.1164	NaN	27.6998	27.3828
Q8NBT2	Kinetochore protein Spc24	SPC24	5	5	36.5	22.478	14.456			NaN	NaN	26.574	NaN	26.5255	NaN	27.0505	27.1604	27.2891	NaN	NaN	26.8142
Q7KZI7	Serine/threonine-protein kinase MARK2	MARK2	8	5	17.3	87.91	14.651			27.5536	27.6251	27.5315	27.2353	27.4629	27.3153	27.5389	NaN	27.7895	NaN	27.3239	NaN
Q9UNE7	E3 ubiquitin-protein ligase CHIP	STUB1	3	3	12.5	34.856	53.502			NaN	27.6458	27.7064	NaN	27.2891	27.5826	27.341	NaN	27.189	NaN	NaN	26.9203
O95671	N-acetylserotonin O-methyltransferase-like protein	ASMTL	10	10	26.7	68.856	48.165			26.7517	NaN	NaN	26.8623	NaN	NaN	29.5627	28.9146	28.6355	28.4433	28.6075	29.0889
Q9UNZ2	NSFL1 cofactor p47	NSFL1C	10	10	41.1	40.572	152.51			30.2869	30.4629	30.5109	30.1604	30.3196	30.5296	29.6948	29.1312	29.7723	28.5426	29.6128	29.2714
Q9UPU5	Ubiquitin carboxyl-terminal hydrolase 24	USP24	27	27	15.5	294.36	62.033			28.5128	28.3992	28.1604	28.509	28.4823	28.1115	29.2285	29.1015	28.9923	28.6424	28.7613	28.8682
Q13283	Ras GTPase-activating protein-binding protein 1	G3BP1	17	16	56.2	52.164	218.26			32.1634	31.9848	31.9224	32.0117	31.8004	31.7494	31.2814	31.2422	31.362	30.846	30.7453	31.2077
P55209	Nucleosome assembly protein 1-like 1	NAP1L1	16	14	56	45.374	304.48			33.3169	33.1872	33.2193	33.0927	33.1828	33.0332	33.1813	33.2759	33.2033	32.8309	32.8719	32.9063
Q5T7N3	KN motif and ankyrin repeat domain-containing protein 4	KANK4	18	18	34.5	107.34	191.02			28.9117	28.5969	27.9484	29.114	28.4354	28.0084	28.2979	27.9372	28.6964	27.6181	28.1795	28.1361
P49354	Protein farnesyltransferase/geranylgeranyltransferase type-1 subunit alpha	FNTA	8	8	31.9	44.408	32.868			27.1984	27.2714	27.1507	27.2262	27.2979	27.141	27.3828	27.1984	27.1015	26.632	27.1015	26.8974
Q9UJX3	Anaphase-promoting complex subunit 7	ANAPC7	16	16	38.7	66.855	31.853			28.1312	28.2891	27.6458	27.9031	27.2714	27.6527	27.4938	NaN	27.509	27.0505	27.2979	27.1115
P17813	Endoglin	ENG	21	21	45.4	70.577	323.31			33.3828	33.3956	32.8719	33.6522	33.5296	33.0414	33.1813	33.0609	33.1161	32.3828	32.686	33.1574
Q8NF37	Lysophosphatidylcholine acyltransferase 1	LPCAT1	6	6	18.5	59.151	112.14			29.2869	29.6075	29.7988	29.0084	29.8726	29.7973	28.5352	29.0453	29.4214	28.5278	28.459	29.0453
Q15257	Serine/threonine-protein phosphatase 2A activator	PPP2R4	11	11	42.5	40.667	266.39			29.5772	29.3971	29.2825	29.7292	29.3992	29.4765	30.947	30.995	30.7292	30.2869	30.5296	30.7927
Q9P0P0	E3 ubiquitin-protein ligase RNF181	RNF181	2	2	26.8	17.909	54.726			26.604	26.8142	26.4923	26.1795	26.3083	25.8504	26.1015	26.0443	26.4645	25.8858	NaN	25.8623
Q8NC51	Plasminogen activator inhibitor 1 RNA-binding protein	SERBP1	14	14	35.5	44.965	175.84			32.0479	31.8937	31.9574	31.8682	31.6154	31.7771	31.6066	31.3828	31.5109	31.0927	31.1544	31.2365
P50748	Kinetochore-associated protein 1	KNTC1	9	9	5.7	250.75	11.682			26.5045	27.4154	26.9428	26.8264	27.0084	26.9869	26.0711	26.2353	25.9293	NaN	25.5841	25.8904
Q9NXJ5	Pyroglutamyl-peptidase 1	PGPEP1	6	6	55	23.138	23.361			NaN	27.189	NaN	NaN	NaN	27.3239	28.1556	27.6251	27.8142	26.8019	27.632	27.965
Q15121	Astrocytic phosphoprotein PEA-15	PEA15	5	5	53.1	15.04	37.8			29.6713	30.0479	29.8608	29.8623	29.8741	29.509	29.5898	29.5736	29.7973	29.3536	29.2331	29.3641
O94822	E3 ubiquitin-protein ligase listerin	LTN1	36	36	25.3	200.55	181.17			30.933	31.0864	30.9609	30.7613	30.7692	30.9117	30.8755	30.8608	30.8309	30.3088	30.7373	30.4823
P35221	Catenin alpha-1	CTNNA1	28	23	45.5	100.07	323.31			30.0864	30.2308	30.2308	29.7597	30.1115	29.9117	30.099	30.0479	30.2535	28.805	29.9677	30.2535
P13995	Bifunctional methylenetetrahydrofolate dehydrogenase/cyclohydrolase, mitochondrial;NAD-dependent methylenetetrahydrofolate dehydrogenase;Methenyltetrahydrofolate cyclohydrolase	MTHFD2	10	10	55.4	37.895	37.976			29.673	29.203	29.3704	29.3578	29.1164	28.965	29.1164	29.0057	29.5147	28.604	28.9512	29.0839
P08238	Heat shock protein HSP 90-beta	HSP90AB1	49	28	60.5	83.263	323.31			35.547	35.6143	35.4458	35.5441	35.4973	35.3303	36.0101	36.0812	36.0753	35.7124	35.7302	35.7175
Q5JRA6	Melanoma inhibitory activity protein 3	MIA3	33	33	30.2	213.7	277.87			29.4314	29.141	29.1239	29.3599	29.1189	29.0296	29.3599	29.459	29.5555	29.0137	29.4649	28.8142
Q53H96	Pyrroline-5-carboxylate reductase 3	PYCRL	4	4	24.8	28.663	8.855			NaN	NaN	NaN	NaN	NaN	NaN	27.0914	26.9316	26.9316	NaN	26.6595	26.632
Q86UK7	Zinc finger protein 598	ZNF598	10	10	20.9	98.636	46.056			26.9539	26.5898	26.632	26.7517	26.2768	26.3762	26.8385	26.9316	26.8019	NaN	26.4504	26.5898
Q13509	Tubulin beta-3 chain	TUBB3	23	8	66.4	50.432	85.901			30.8755	30.8309	30.8309	30.6629	30.6372	30.5573	29.8974	29.7341	30.1604	NaN	29.4214	29.7739
Q14694	Ubiquitin carboxyl-terminal hydrolase 10	USP10	18	18	36.6	87.133	205.08			30.1483	29.8489	29.5754	29.995	29.6981	29.4473	29.7129	29.726	29.7927	29.579	29.3388	29.3001
Q9BWF3	RNA-binding protein 4	RBM4	15	4	54.4	40.313	238.47			30.6285	30.5296	30.5014	30.6372	30.4629	30.5014	29.9677	29.8474	30.099	28.8294	29.6355	30.1604
P57737	Coronin-7	CORO7	17	17	31.1	100.6	68.274			28.8711	28.3951	28.6492	29.189	28.8142	28.9732	29.7421	29.6764	29.3088	29.17	29.3153	29.2759
Q7L1Q6	Basic leucine zipper and W2 domain-containing protein 1	BZW1	10	9	18.9	48.043	12.582			29.6198	29.4765	29.5808	29.3951	29.3153	29.1842	30.099	29.995	30.1361	29.8504	29.6612	29.7195
Q9BSJ2	Gamma-tubulin complex component 2	TUBGCP2	12	12	19.1	102.53	39.882			26.3926	26.1546	26.2661	26.3844	26.1738	26.2979	27.141	27.3662	27.5165	27.141	26.965	26.9428
Q86Y39	NADH dehydrogenase [ubiquinone] 1 alpha subcomplex subunit 11	NDUFA11	4	4	49.6	14.852	7.6966			NaN	NaN	NaN	27.8385	NaN	NaN	NaN	27.9705	NaN	NaN	27.509	27.7645
P17844	Probable ATP-dependent RNA helicase DDX5	DDX5	37	29	59	69.147	289.09			34.0017	33.9153	34.0512	33.9417	33.7353	33.8234	33.6307	33.6198	33.5978	33.4083	33.1649	33.2759
Q96RT1	Protein LAP2	ERBB2IP	19	19	21.7	158.3	102.89			28.9344	29.2913	28.9287	28.805	29.0839	28.9344	29.1115	29.2331	29.3001	28.8474	28.8534	28.9567
Q9BR76	Coronin-1B	CORO1B	19	19	46.6	54.234	105.82			32.1813	32.0316	31.8571	32.1052	32.0864	31.7613	31.7927	31.7692	31.5343	31.2135	31.4919	31.3982
Q14145	Kelch-like ECH-associated protein 1	KEAP1	9	9	20.4	69.666	14.2			NaN	27.1312	NaN	NaN	NaN	NaN	27.4314	27.2077	27.5315	NaN	NaN	27.0609
P36404	ADP-ribosylation factor-like protein 2	ARL2	8	8	44.6	20.878	13.944			27.9484	27.4154	28.2353	27.8799	27.3992	28.1842	27.0084	NaN	27.5389	NaN	26.965	NaN
Q13151	Heterogeneous nuclear ribonucleoprotein A0	HNRNPA0	12	12	50.5	30.84	132.38			31.2647	30.995	31.015	31.196	31.0927	31.08	30.8157	30.7211	30.8004	29.94	30.7453	30.5481
Q9H6Z4	Ran-binding protein 3	RANBP3	10	10	25.4	60.209	92.139			29.8142	29.6663	29.7276	29.8697	29.5951	29.8234	29.2759	29.0531	29.4174	28.7676	28.8741	29.1189
Q9Y2U8	Inner nuclear membrane protein Man1	LEMD3	12	12	18.2	99.996	114.75			26.965	NaN	27.0505	27.1507	NaN	27.019	28.0813	27.9203	28.003	27.5969	27.7581	27.6663
P20336	Ras-related protein Rab-3A	RAB3A	7	4	42.7	24.984	15.309			28.2216	27.509	27.7771	27.3745	27.604	27.6798	28.6005	28.7357	28.3787	28.5573	28.3196	27.7708
O75494	Serine/arginine-rich splicing factor 10	SRSF10	7	7	19.5	31.3	18.517			29.7786	29.3088	29.8142	30.0737	29.459	29.747	29.708	29.1747	29.5609	NaN	28.7988	29.4688
Q92621	Nuclear pore complex protein Nup205	NUP205	20	20	15.4	227.92	72.113			31.4678	29.0634	30.8901	31.2979	34.3502	30.7927	32.375	32.1604	31.6964	31.9505	31.8608	31.4775
P50750	Cyclin-dependent kinase 9	CDK9	8	7	29.8	42.777	14.52			27.2262	NaN	27.1507	27.4473	NaN	26.7645	27.632	27.7195	27.8264	26.976	27.3239	27.7895
Q9Y2A7	Nck-associated protein 1	NCKAP1	20	20	28	128.79	124.29			28.4976	28.4823	27.5014	28.6285	28.1312	28.0864	29.8564	29.9814	29.4093	29.5147	29.55	29.2399
Q9BZV1	UBX domain-containing protein 6	UBXN6	8	8	34.9	49.753	19.34			26.5754	NaN	26.4154	26.6998	26.6458	26.6458	27.5165	27.4551	27.4862	NaN	26.8385	27.4314
P54725	UV excision repair protein RAD23 homolog A	RAD23A	10	7	49.9	39.609	21.952			NaN	26.1391	26.1719	26.604	26.0484	NaN	26.6181	26.632	NaN	NaN	NaN	26.2996
O96007	Molybdopterin synthase catalytic subunit	MOCS2	7	7	44.1	20.944	15.501			27.7708	27.8916	27.8385	27.141	27.5826	27.3578	27.3066	27.2445	27.8081	NaN	NaN	27.1507
Q9Y2V2	Calcium-regulated heat stable protein 1	CARHSP1	4	4	59.2	15.892	37.098			30.099	29.8504	29.8157	29.9539	30.0084	29.9539	30.5014	30.3196	30.8534	30.3828	30.2308	30.1361
Q86U90	YrdC domain-containing protein, mitochondrial	YRDC	5	5	32.6	29.328	23.989			27.7517	27.4785	27.5682	27.4862	27.4938	27.3153	27.604	27.5315	27.5165	NaN	27.0711	27.3745
Q5VYK3	Proteasome-associated protein ECM29 homolog	ECM29	36	36	26.7	204.29	106.21			28.0505	29.1483	28.7613	28.805	28.7927	29.1819	30.2759	30.2535	30.2193	29.9539	29.995	29.8203
P17812	CTP synthase 1	CTPS1	29	27	67	66.69	311.31			32.8516	32.5319	32.5179	32.7771	32.5273	32.463	33.1483	32.9347	33.0592	32.7907	32.5933	32.8004
P31153	S-adenosylmethionine synthase isoform type-2	MAT2A	13	13	40.8	43.66	22.328			30.7927	30.6458	30.6022	30.7613	30.2979	30.4727	30.393	30.4433	30.4433	29.9814	30.2647	30.0737
P27708	CAD protein;Glutamine-dependent carbamoyl-phosphate synthase;Aspartate carbamoyltransferase;Dihydroorotase	CAD	65	65	43.3	242.98	323.31			32.2647	32.0117	32.0544	32.3463	32.0447	32.0641	32.0381	31.8974	31.9365	31.5156	31.6964	31.6964
Q92620	Pre-mRNA-splicing factor ATP-dependent RNA helicase PRP16	DHX38	23	23	26	140.5	70.662			29.3452	28.94	28.8741	29.3807	28.8653	28.9622	28.362	28.0914	28.5609	NaN	27.7195	28.2891
Q9UHF7	Zinc finger transcription factor Trps1	TRPS1	13	13	16.9	141.52	123.98			27.9923	27.7895	28.1604	27.9595	27.6865	28.141	27.8081	NaN	27.8142	NaN	NaN	27.4938
Q9NR30	Nucleolar RNA helicase 2	DDX21	31	29	47.1	87.343	242.32			31.8901	31.4871	31.6713	31.5109	31.4234	31.4532	31.0609	31.3356	31.2308	31.0414	30.6285	30.9882
P26232	Catenin alpha-2	CTNNA2	6	1	9.1	105.31	10.72			27.17	27.4862	27.524	26.5195	NaN	27.0914	NaN	26.6998	NaN	25.5345	25.9043	27.1795
Q15165	Serum paraoxonase/arylesterase 2	PON2	11	11	50	39.38	68.516			30.3196	29.7437	29.9259	30.2308	30.1115	29.8697	30.7453	31.1422	31.099	29.7047	30.8081	31.1842
Q86XI2	Condensin-2 complex subunit G2	NCAPG2	5	5	6.5	130.96	9.9475			NaN	26.2463	25.9248	NaN	25.8623	25.965	NaN	NaN	26.0084	25.6971	25.6622	25.726
Q01433	AMP deaminase 2	AMPD2	8	8	12.3	100.69	32.374			27.9203	27.8916	27.7389	28.003	27.7895	27.7389	27.7708	27.5969	27.8623	NaN	27.2625	27.5898
P27816	Microtubule-associated protein 4	MAP4	29	29	39.6	121	189.08			29.8445	29.9259	30.2193	29.7597	29.995	29.94	29.9259	29.8785	29.8127	29.2445	29.6561	29.7437
Q8WYQ5	Microprocessor complex subunit DGCR8	DGCR8	4	4	11.8	86.044	4.2199			NaN	NaN	NaN	NaN	NaN	NaN	NaN	NaN	25.6784	NaN	NaN	25.3679
P61960	Ubiquitin-fold modifier 1	UFM1	4	4	68.2	9.1175	50.435			29.7146	NaN	29.2891	29.6022	29.1214	28.9146	30.3088	29.9539	30.0349	NaN	29.5071	30.0349
Q9UGR2	Zinc finger CCCH domain-containing protein 7B	ZC3H7B	5	4	7.4	109.86	7.0129			26.217	26.4999	26.604	26.2225	NaN	NaN	NaN	NaN	26.3877	NaN	NaN	26.0772
Q6GMV3	Putative peptidyl-tRNA hydrolase PTRHD1	PTRHD1	6	6	70	15.805	29.974			29.7309	29.8785	29.843	29.747	29.6093	29.94	29.3641	28.9456	29.1937	28.391	29.0057	29.109
Q9H871	Protein RMD5 homolog A	RMND5A	2	2	6.4	43.992	3.6461			NaN	NaN	NaN	NaN	25.7024	NaN	25.7771	26.1449	25.8409	NaN	NaN	25.6209
Q96CW5	Gamma-tubulin complex component 3	TUBGCP3	10	10	16.1	103.57	13.549			NaN	NaN	NaN	NaN	26.4488	NaN	27.4629	27.5389	27.5536	NaN	26.9316	27.4473
O00151	PDZ and LIM domain protein 1	PDLIM1	19	19	80.9	36.071	168.47			31.5014	31.5799	31.4532	30.7692	31.4483	31.325	31.2869	31.3088	31.2979	30.8829	31.1544	30.9259
Q15382	GTP-binding protein Rheb	RHEB	7	7	28.8	20.497	20.369			28.5128	28.5646	28.5426	28.1795	28.249	28.3787	28.6181	29.1214	29.1312	28.7958	28.7708	28.4113
Q92797	Symplekin	SYMPK	19	19	29.3	141.15	119.54			29.5222	29.5052	29.3599	29.6441	29.3599	29.6058	29.2625	29.4413	29.2825	27.9259	29.3324	29.3992
Q9H9B1	Histone-lysine N-methyltransferase EHMT1	EHMT1	9	9	13.5	141.46	26.233			NaN	26.3861	NaN	26.3959	NaN	26.4154	26.5404	26.5754	26.7129	NaN	NaN	26.3066
O00443	Phosphatidylinositol 4-phosphate 3-kinase C2 domain-containing subunit alpha	PIK3C2A	4	4	3	190.68	5.1744			NaN	25.2463	25.2679	25.1371	24.989	25.3477	25.4008	25.019	25.3975	NaN	24.976	NaN
Q9P2R3	Rabankyrin-5	ANKFY1	21	21	29	128.4	105.51			29.3044	29.4053	29.5109	29.2123	29.5463	29.4957	29.3599	29.3494	29.3217	28.49	29.1819	29.3217
P08865	40S ribosomal protein SA	RPSA	17	17	64.1	32.854	323.31			34.0184	34.0101	33.9417	33.9848	33.9153	33.9153	34.0184	33.7453	33.8138	33.4209	33.4083	33.8234
P60842	Eukaryotic initiation factor 4A-I	EIF4A1	31	19	78.3	46.153	323.31			35.099	35.1068	35.0471	34.8608	34.8234	34.6735	34.8328	34.7751	34.8974	34.5922	34.4581	34.5527
A6NKT7	RanBP2-like and GRIP domain-containing protein 3	RGPD3	20	0	16.8	197.48	3.7224			26.2243	NaN	NaN	25.8788	26.0752	NaN	26.5551	26.8019	26.521	NaN	NaN	26.3273
Q14515	SPARC-like protein 1	SPARCL1	20	20	48.8	75.207	323.31			29.2007	27.8081	26.632	29.6898	28.7549	28.4823	31.0017	30.8534	29.7389	30.4532	30.5014	29.9677
Q14161	ARF GTPase-activating protein GIT2	GIT2	9	7	23.1	84.542	68.762			26.7895	27.4314	27.4551	27.3745	27.2625	27.3745	27.6389	27.0296	27.632	NaN	27.019	27.2803
P40937	Replication factor C subunit 5	RFC5	14	14	48.5	38.496	88.72			30.5109	30.2308	30.3196	30.5296	30.5014	30.5203	30.2535	30.2422	30.1239	29.3745	30.0609	30.1604
Q53QV2	Protein LBH	LBH	8	8	75.2	12.217	96.626			28.611	28.9117	28.7357	28.9088	28.7357	28.8474	28.5463	27.9088	28.8019	28.8019	27.5826	27.7958
Q9HD15	Steroid receptor RNA activator 1	SRA1	7	7	33.5	25.673	67.939			26.9316	27.1604	26.8858	26.8741	26.6865	26.3861	26.5754	26.5754	27.0609	26.8264	25.9847	26.4488
O95433	Activator of 90 kDa heat shock protein ATPase homolog 1	AHSA1	14	14	47.3	38.274	181.56			31.1361	31.4234	31.08	31.0864	31.0084	30.7692	30.1239	30.1724	30.0864	29.6764	29.7195	30.0609
O95070	Protein YIF1A	YIF1A	2	2	11.6	32.011	5.6168			27.4707	NaN	NaN	27.3239	NaN	NaN	27.3494	NaN	27.8445	26.9869	NaN	27.5826
P13693	Translationally-controlled tumor protein	TPT1	9	9	52.9	19.595	33.733			32.3594	32.3088	32.1989	32.0769	32.015	31.9117	32.3223	32.3698	32.3568	32.015	32.1483	31.9848
Q14157	Ubiquitin-associated protein 2-like	UBAP2L	18	18	31.4	114.53	323.31			31.1842	31.0544	31.015	30.8974	30.8309	30.8901	30.8385	30.8004	31.08	30.5014	30.6881	30.6458
Q9NUU7	ATP-dependent RNA helicase DDX19A	DDX19A	20	5	52.3	53.974	212.54			30.8682	30.7211	30.5481	30.8081	30.5573	30.3303	30.7453	30.6458	30.7927	30.5203	30.3088	30.4532
Q14008	Cytoskeleton-associated protein 5	CKAP5	47	47	32.2	225.49	251.36			31.099	31.2308	31.1842	30.8608	30.8829	30.9746	31.393	31.4823	31.5481	31.2869	31.1239	31.1177
Q9Y4P1	Cysteine protease ATG4B	ATG4B	12	12	42	44.294	55.128			28.1556	28.1747	28.3023	27.965	27.7833	28.0762	28.2759	28.1984	28.0243	27.9484	27.9031	27.7645
P50570	Dynamin-2	DNM2	20	15	30.8	98.063	81.277			29.57	29.5555	29.6251	29.7645	29.5808	29.5987	29.4234	29.4668	29.3367	28.8355	29.3153	29.1532
O00161	Synaptosomal-associated protein 23	SNAP23	5	5	37.9	23.354	20.193			28.066	28.6146	28.4113	27.9539	28.4707	28.189	28.2123	27.8799	28.1115	28.1361	27.4394	27.673
Q15283	Ras GTPase-activating protein 2	RASA2	8	8	14.8	96.613	29.131			27.2353	27.2262	26.965	27.1984	27.2979	27.5315	27.2077	27.2535	27.019	NaN	26.6458	27.0609
P18085	ADP-ribosylation factor 4	ARF4	9	6	64.4	20.511	12.329			29.611	29.94	29.8127	29.4512	29.7178	29.6424	30.0737	30.2193	30.1483	29.6612	30.0479	29.8355
Q07866	Kinesin light chain 1	KLC1	20	13	42.6	65.309	134.33			30.4433	30.5844	30.5933	30.3724	30.5754	30.5844	30.2535	30.2077	30.2647	29.6865	29.9814	30.1483
Q13310	Polyadenylate-binding protein 4	PABPC4	23	14	44.3	70.782	229.89			31.4678	31.5296	31.3303	31.4134	31.3879	31.1177	30.9746	30.9677	30.995	30.5573	30.7047	30.7849
Q9UI12	V-type proton ATPase subunit H	ATP6V1H	9	9	28.4	55.882	50.101			28.1164	28.3196	28.0453	28.019	28.1263	28.1065	28.249	28.509	28.003	28.0711	28.066	27.7708
Q14258	E3 ubiquitin/ISG15 ligase TRIM25	TRIM25	16	16	36.7	70.973	114.18			29.7958	29.8004	29.6848	29.9677	29.7645	29.9117	29.7162	29.6713	29.5463	29.003	29.7309	29.2353
Q9Y376	Calcium-binding protein 39	CAB39	7	7	18.8	39.869	25.832			26.8385	26.4583	26.5463	26.6595	NaN	26.1965	27.2714	27.4785	27.2445	27.0609	27.4551	26.4457
Q9UBB4	Ataxin-10	ATXN10	13	13	40.4	53.488	68.419			29.2692	29.0914	28.9117	29.1604	28.8504	28.604	29.2422	29.3641	29.0711	29.1747	28.8945	28.7129
O75821	Eukaryotic translation initiation factor 3 subunit G	EIF3G	16	16	56.2	35.611	115.38			30.7533	30.6285	30.5933	30.6372	30.5573	30.5844	30.8081	30.5844	30.6713	30.7047	30.1361	30.3088
P78559	Microtubule-associated protein 1A;MAP1A heavy chain;MAP1 light chain LC2	MAP1A	47	45	25.3	305.48	180.69			30.341	30.6629	31.0414	29.7195	30.6629	31.0609	30.3828	30.4134	30.2647	29.7927	30.0609	30.3088
Q8IWA4	Mitofusin-1	MFN1	9	8	18.4	84.159	32.163			26.7771	26.8019	26.7645	26.5029	26.8142	26.4024	27.2714	27.0296	27.6865	26.8264	NaN	27.2714
Q99614	Tetratricopeptide repeat protein 1	TTC1	15	15	65.8	33.526	204.99			30.7771	30.7927	30.6022	30.9045	30.8081	30.3088	31.1115	31.0349	31.0737	31.0349	30.7047	30.5754
P85037	Forkhead box protein K1	FOXK1	4	4	9.1	75.456	6.0416			26.9428	26.5507	NaN	26.8741	26.7129	NaN	NaN	NaN	26.7645	NaN	26.7645	26.1095
P16333	Cytoplasmic protein NCK1	NCK1	13	12	51.5	42.864	97.886			28.4234	28.4823	28.2891	28.3662	28.341	28.3239	28.7129	28.8385	28.8203	28.55	28.5052	28.459
O15061	Synemin	SYNM	10	10	11.4	172.77	76.034			26.9088	27.141	NaN	27.604	27.4862	27.2262	27.4551	NaN	27.4862	NaN	NaN	27.189
O15160	DNA-directed RNA polymerases I and III subunit RPAC1	POLR1C	6	6	29.2	39.249	18.01			27.2077	27.0084	27.2891	27.3494	27.391	26.965	27.3239	27.5609	27.3992	NaN	26.9203	27.341
Q96SI9	Spermatid perinuclear RNA-binding protein	STRBP	15	12	28.7	73.652	20.832			27.8203	27.217	27.6595	28.2216	27.7833	27.0401	28.9031	28.7581	28.4113	28.0914	28.5933	28.5278
P21266	Glutathione S-transferase Mu 3	GSTM3	16	15	72.4	26.559	293.4			31.4871	32.4032	32.5686	31.2869	32.5641	32.6394	30.5844	30.4532	30.2193	29.5109	30.5014	30.2422
Q8N6M0	OTU domain-containing protein 6B	OTUD6B	5	5	35.8	33.812	33.469			27.2535	27.5315	27.4073	27.4314	27.4154	27.1214	27.965	27.7708	28.2445	27.6798	NaN	27.7645
Q15691	Microtubule-associated protein RP/EB family member 1	MAPRE1	17	15	79.1	29.999	319.65			32.2731	32.2786	32.2422	31.8497	31.9295	31.8937	32.0512	32.0447	32.0117	31.9848	31.5527	31.6839
Q13428	Treacle protein	TCOF1	21	21	25.6	152.1	301.32			30.0737	29.1115	29.114	29.7014	29.2535	28.9456	29.158	28.5609	29.2399	29.0164	28.1507	28.8887
Q15437	Protein transport protein Sec23B	SEC23B	22	19	44.9	86.478	214.22			30.2647	30.2869	30.2308	30.2647	30.2535	30.3088	30.4134	30.5109	30.4334	30.0349	30.0479	30.4032
Q9Y3A3	MOB-like protein phocein	MOB4	5	5	34.7	26.032	21.591			27.8385	27.7833	27.9923	27.6389	27.7771	27.7708	27.9316	28.0813	28.17	NaN	27.4154	28.0711
Q13617	Cullin-2	CUL2	16	16	31.4	86.982	28.712			28.0296	27.8445	27.9595	27.9203	27.9088	28.003	27.8682	28.1795	27.9595	27.5315	27.9031	NaN
Q01780	Exosome component 10	EXOSC10	9	9	15.5	100.83	39.927			27.9484	27.3662	27.632	27.9869	27.6389	27.7517	27.17	27.3324	27.2891	NaN	27.1015	26.8623
P55265	Double-stranded RNA-specific adenosine deaminase	ADAR	31	31	35.6	136.06	323.31			30.7453	30.5481	30.7129	30.7849	30.7533	30.7373	30.5933	30.4629	30.5014	29.6146	30.4727	30.4727
Q9UHR5	SAP30-binding protein	SAP30BP	5	5	24.4	33.87	13.736			26.726	26.6865	NaN	26.6865	NaN	26.7895	26.3992	NaN	27.0505	NaN	NaN	26.48
Q9NU22	Midasin	MDN1	13	13	4.4	632.81	45.794			26.9203	26.6181	26.5419	26.6865	26.632	26.5898	NaN	25.9628	NaN	NaN	25.6865	NaN
O95757	Heat shock 70 kDa protein 4L	HSPA4L	45	41	66.4	94.511	323.31			32.9729	33.025	33.0134	32.8865	32.9797	32.8119	33.2897	33.2336	33.1084	32.9882	32.9312	32.8829
O95340	Bifunctional 3-phosphoadenosine 5-phosphosulfate synthase 2;Sulfate adenylyltransferase;Adenylyl-sulfate kinase	PAPSS2	10	9	23.3	69.5	111.59			29.0349	29.203	29.3282	28.726	29.0505	29.2147	30.2979	30.2308	30.1361	29.995	29.7849	30.0609
P62495	Eukaryotic peptide chain release factor subunit 1	ETF1	14	14	38.4	49.03	82.432			31.2814	31.2077	31.1544	31.1115	30.8157	30.9609	30.9746	31.0544	31.0349	30.5664	30.8829	30.7771
O75427	Leucine-rich repeat and calponin homology domain-containing protein 4	LRCH4	13	13	36.3	73.449	140.85			28.6216	28.2535	28.3367	28.6527	28.3196	28.1842	28.9869	28.5609	28.8887	28.6075	28.4707	28.5646
P48556	26S proteasome non-ATPase regulatory subunit 8	PSMD8	12	12	37.7	39.611	291.93			30.5664	30.5754	30.6022	30.5389	30.6285	30.5573	30.4919	30.6629	30.6372	30.1483	30.341	30.4727
Q15042	Rab3 GTPase-activating protein catalytic subunit	RAB3GAP1	24	24	37.2	110.52	86.765			28.3367	28.4551	28.267	28.4823	28.5826	28.2535	29.4823	29.4394	29.5536	29.1483	29.1747	29.3282
Q13131	5-AMP-activated protein kinase catalytic subunit alpha-1	PRKAA1	11	11	31.3	64.009	69.944			28.0137	27.9316	27.7645	27.7195	27.8081	27.8445	28.5754	28.2935	28.5609	27.8264	28.2445	28.4823
Q8NFH5	Nucleoporin NUP53	NUP35	6	6	35	34.773	39.427			27.5969	27.7453	27.5315	27.8974	27.6527	27.6527	27.604	NaN	27.9428	NaN	NaN	27.509
Q13907	Isopentenyl-diphosphate Delta-isomerase 1	IDI1	9	9	59.5	26.319	55.874			28.6527	28.4274	28.2216	29.2512	28.7739	28.3787	28.2714	28.1459	27.9031	27.8564	27.9869	27.6663
Q86Y56	Dynein assembly factor 5, axonemal	DNAAF5	14	14	23	93.52	80.388			27.7325	27.5389	27.5754	27.4707	27.4862	27.0914	27.726	27.7895	27.8264	27.6595	27.4629	27.391
Q9ULX3	RNA-binding protein NOB1	NOB1	4	4	15.3	46.674	109.44			NaN	26.2679	26.228	26.1738	26.2661	26.17	26.604	26.6595	26.1623	NaN	26.2225	NaN
Q9UDT6	CAP-Gly domain-containing linker protein 2	CLIP2	6	3	9.2	115.84	5.923			27.4154	NaN	27.5536	27.1115	NaN	27.5682	NaN	27.7195	NaN	NaN	NaN	27.4473
O14497	AT-rich interactive domain-containing protein 1A	ARID1A	16	14	14.6	242.04	97.345			28.5536	27.726	27.341	28.2123	27.17	27.8203	27.217	26.574	27.2979	26.965	26.9203	26.433
Q15773	Myeloid leukemia factor 2	MLF2	2	2	13.7	28.147	22.669			NaN	NaN	NaN	NaN	NaN	NaN	25.8215	NaN	26.2926	25.8069	NaN	NaN
P33316	Deoxyuridine 5-triphosphate nucleotidohydrolase, mitochondrial	DUT	9	9	49.2	26.563	49.59			29.5444	29.3473	29.4274	29.6458	29.509	29.3971	28.8385	28.8173	28.7581	NaN	28.5862	28.4823
Q9Y680	Peptidyl-prolyl cis-trans isomerase FKBP7	FKBP7	8	8	37.8	25.794	19.699			27.6865	27.3324	27.3745	27.9484	27.7064	27.5682	28.9539	28.976	28.8711	28.0243	28.4473	29.2535
O14976	Cyclin-G-associated kinase	GAK	14	14	17.7	143.19	40.558			27.6663	27.8203	27.6931	27.6595	27.5463	27.5826	29.0557	28.6355	28.8415	NaN	28.3951	28.7549
P04424	Argininosuccinate lyase	ASL	3	3	11.4	51.657	27.214			25.6649	25.9977	NaN	NaN	25.7466	NaN	NaN	25.8858	NaN	NaN	25.5869	25.6486
Q9Y2W1	Thyroid hormone receptor-associated protein 3	THRAP3	14	13	19.9	108.66	151.2			30.6458	30.341	30.4629	30.6964	30.5014	30.6022	30.3088	30.0349	30.5203	30.1483	29.7292	30.1842
Q9UMX0	Ubiquilin-1	UBQLN1	12	7	34.6	62.518	264.97			30.6798	30.6198	30.6022	30.7453	30.6713	30.6285	31.4581	31.4967	31.5435	31.0927	31.2814	31.3142
Q9Y5K8	V-type proton ATPase subunit D	ATP6V1D	4	4	32	28.262	9.7583			26.7771	26.4122	26.2408	26.4661	26.2517	26.0711	26.7895	26.9088	27.17	NaN	NaN	26.6998
Q9H4L7	SWI/SNF-related matrix-associated actin-dependent regulator of chromatin subfamily A containing DEAD/H box 1	SMARCAD1	8	8	13.4	117.4	31.641			26.2768	26.518	26.5898	26.8264	NaN	26.2785	NaN	NaN	26.5448	NaN	26.2768	NaN
Q96P47	Arf-GAP with GTPase, ANK repeat and PH domain-containing protein 3	AGAP3	7	6	15.5	95.043	107.99			28.066	27.8504	27.8741	28.0557	27.7581	27.5969	28.5352	28.6458	28.5933	28.2891	28.2979	28.391
Q9Y3F4	Serine-threonine kinase receptor-associated protein	STRAP	17	17	62.6	38.438	214.13			31.3672	31.4871	31.4967	31.2647	31.1901	31.1842	31.2077	31.1842	31.2308	30.947	31.0017	30.8755
P49589	Cysteine--tRNA ligase, cytoplasmic	CARS	20	20	32.6	85.472	94.931			28.5052	28.1747	28.1115	28.3452	28.066	28.249	29.249	29.1361	29.1913	28.611	29.027	29.0965
P46379	Large proline-rich protein BAG6	BAG6	21	21	32.5	119.41	116.15			30.6372	30.8004	30.5664	30.7211	30.6372	30.6629	30.933	30.8385	30.8081	30.4629	30.7453	30.5664
Q99436	Proteasome subunit beta type-7	PSMB7	6	6	36.5	29.965	49.506			29.94	29.8112	30.099	29.9539	30.0864	29.9259	30.1115	30.0349	29.9259	NaN	30.0349	29.4234
Q9NX62	Inositol monophosphatase 3	IMPAD1	7	7	25.3	38.681	30.886			28.3494	28.6931	28.6492	28.141	28.5203	28.4551	28.459	28.9146	28.5128	NaN	28.341	28.4194
O60716	Catenin delta-1	CTNND1	25	25	40.2	108.17	323.31			31.1783	31.2422	30.94	31.0544	30.9045	30.5933	30.947	30.9814	31.2193	30.9259	30.8004	30.6285
Q9Y3U8	60S ribosomal protein L36	RPL36	4	4	32.4	12.254	7.013			31.4334	31.0479	31.0737	31.4284	31.0864	30.9882	30.8385	31.0609	31.1544	30.4727	30.4532	31.2193
Q68CZ2	Tensin-3	TNS3	31	30	43.3	155.26	208.38			31.225	31.7888	31.9677	31.0283	31.6329	31.7333	30.5933	30.3515	30.9188	29.8203	30.4629	30.7047
Q07960	Rho GTPase-activating protein 1	ARHGAP1	20	20	69	50.435	234.8			31.0673	31.2759	31.3776	31.0349	31.2591	31.4384	32.5844	32.5777	32.5179	32.2422	32.2393	32.4108
Q9NVT9	Armadillo repeat-containing protein 1	ARMC1	6	6	53.9	31.28	60.853			28.2847	28.6251	NaN	NaN	28.3196	28.4938	28.8564	28.5128	28.7927	NaN	28.0813	28.7739
Q9UKY7	Protein CDV3 homolog	CDV3	13	13	72.1	27.335	211.23			30.611	30.6881	30.846	30.2308	30.5296	30.2869	29.5951	29.1937	29.7064	NaN	29.0788	29.4113
Q9NP72	Ras-related protein Rab-18	RAB18	8	8	51.9	22.977	28.279			29.6303	29.6233	29.7453	29.362	29.5071	29.5772	29.3153	29.3303	29.4919	29.2557	29.1361	28.9567
P00374	Dihydrofolate reductase	DHFR	7	7	40.6	21.452	8.8482			28.7453	28.0401	28.4823	28.8504	28.4823	28.7064	NaN	28.3109	28.1984	27.7833	27.9869	28.1937
Q6NYC1	Bifunctional arginine demethylase and lysyl-hydroxylase JMJD6	JMJD6	5	5	21.3	46.461	39.804			27.611	27.4551	27.7195	27.4473	26.9088	27.2262	26.5135	26.3943	27.0084	NaN	NaN	26.4057
P13612	Integrin alpha-4	ITGA4	12	12	18.5	114.9	48.313			27.7895	28.7227	28.362	27.5682	28.604	28.003	26.8142	27.1015	27.1604	NaN	NaN	26.7771
Q15642	Cdc42-interacting protein 4	TRIP10	9	9	26.5	68.351	323.31			27.7195	28.258	27.7453	27.7325	27.8564	27.5898	28.1312	28.2979	28.2891	27.8203	28.0965	28.0243
P48449	Lanosterol synthase	LSS	18	18	31	83.308	33.4			27.7389	27.1795	27.9977	28.7927	28.7064	28.5826	28.5165	28.632	28.3066	27.9088	28.5969	28.1065
Q9BZG8	Diphthamide biosynthesis protein 1	DPH1	2	2	9	48.805	12.919			NaN	25.0359	NaN	25.7645	25.0401	25.3342	25.3342	25.1055	NaN	NaN	NaN	24.9672
O00571;O15523	ATP-dependent RNA helicase DDX3X;ATP-dependent RNA helicase DDX3Y	DDX3X;DDX3Y	33	30	60.7	73.243	161.57			32.5504	32.4727	32.5709	32.4991	32.2164	32.2952	32.1901	31.9435	32.1544	31.8974	31.781	31.8497
O60678	Protein arginine N-methyltransferase 3	PRMT3	9	9	20.3	59.902	15.823			27.6181	27.4234	27.5315	27.2803	27.2535	27.2625	27.3494	27.3153	27.3745	27.2979	26.8504	NaN
Q7L2H7	Eukaryotic translation initiation factor 3 subunit M	EIF3M	17	17	54.8	42.502	276.36			31.325	31.2924	31.1544	31.3142	31.1422	31.0017	31.4629	31.4678	31.325	31.325	31.1664	30.9814
Q8WUW1	Protein BRICK1	BRK1	2	2	32	8.7448	12.275			26.632	26.8858	26.4409	26.6458	26.604	26.5014	27.0914	27.2803	27.0609	27.0609	26.9977	26.5667
Q9Y2K7	Lysine-specific demethylase 2A	KDM2A	8	8	10.3	132.79	15.642			27.6798	27.341	27.1507	27.9814	27.4073	27.1984	NaN	27.1604	26.976	NaN	26.976	26.632
Q9H1Y0	Autophagy protein 5	ATG5	3	3	16	32.447	54.15			26.8142	26.8974	26.8504	26.8142	26.8623	27.1312	26.4202	26.632	26.5105	NaN	26.1273	26.4024
Q96C19	EF-hand domain-containing protein D2	EFHD2	13	13	48.8	26.697	46.805			30.6285	29.9539	29.4862	30.362	29.4473	29.0609	28.8564	29.0003	29.3869	28.9428	28.6998	28.8799
P30533	Alpha-2-macroglobulin receptor-associated protein	LRPAP1	11	11	33.9	41.465	39.184			29.2445	29.1189	28.8234	29.2216	29.2557	28.8623	30.1115	30.0479	30.1239	29.4194	30.1239	29.893
P51116	Fragile X mental retardation syndrome-related protein 2	FXR2	14	12	28.5	74.222	157.52			28.9869	29.0296	28.9677	28.8324	28.7292	28.7802	28.3662	28.1795	28.2803	NaN	27.9595	28.0864
Q96CT7	Coiled-coil domain-containing protein 124	CCDC124	5	5	30.9	25.835	10.61			28.3494	NaN	NaN	NaN	NaN	NaN	NaN	NaN	28.1842	NaN	27.8081	28.0453
Q6NUQ4	Transmembrane protein 214	TMEM214	13	13	27.7	77.15	30.048			27.726	27.3745	27.9259	27.3153	27.4551	27.9146	28.3066	28.632	28.4314	27.6458	28.1984	28.6216
Q00341	Vigilin	HDLBP	43	43	45.4	141.45	223.63			31.6022	31.7652	31.7252	31.4134	31.6501	31.6066	32.0895	31.995	32.1544	32.0673	31.5062	31.8608
O00461	Golgi integral membrane protein 4	GOLIM4	9	9	20.3	81.879	39.392			28.258	27.5682	27.9539	28.0137	28.1459	27.8445	28.4629	28.2308	28.7895	28.2445	28.1263	28.3992
Q13573	SNW domain-containing protein 1	SNW1	14	14	35.6	61.494	60.127			28.6005	28.7129	28.5426	28.7162	28.6798	28.5278	28.4354	28.217	28.55	28.3536	27.726	28.3109
Q8TDX7	Serine/threonine-protein kinase Nek7	NEK7	7	7	32.5	34.551	8.4942			27.1115	NaN	NaN	NaN	NaN	NaN	27.5165	27.1312	NaN	NaN	27.0813	NaN
P46783;Q9NQ39	40S ribosomal protein S10;Putative 40S ribosomal protein S10-like	RPS10;RPS10P5	8	8	43	18.898	34.401			31.4823	31.2869	31.1842	31.3463	30.8901	31.2703	30.6458	30.5203	31.2135	30.2979	30.4629	30.9045
Q15814	Tubulin-specific chaperone C	TBCC	10	10	41.6	39.248	47.501			27.5826	27.9539	27.8741	27.7833	27.9146	28.0084	28.8799	28.673	28.7325	28.6629	28.217	28.6285
P15428	15-hydroxyprostaglandin dehydrogenase [NAD(+)]	HPGD	8	8	41.7	28.977	34.168			29.94	28.189	26.7517	29.6646	27.8858	NaN	27.8081	27.6595	29.6285	27.17	27.9088	29.3239
Q13347	Eukaryotic translation initiation factor 3 subunit I	EIF3I	18	18	74.8	36.501	120.6			31.2924	31.13	31.2135	31.1901	31.1052	31.1239	31.0349	31.099	31.2647	30.7613	30.7453	31.1239
Q9NX55	Huntingtin-interacting protein K	HYPK	4	4	43.4	14.665	72.234			29.0084	29.1842	29.2736	29.1435	28.8945	28.9344	28.9677	29.109	29.1483	NaN	28.8711	28.7895
Q9NR12	PDZ and LIM domain protein 7	PDLIM7	14	14	52.7	49.844	94.68			29.6058	29.995	30.1483	29.3452	29.6981	29.8081	29.747	29.7692	30.3088	29.2353	29.94	29.8901
Q15366	Poly(rC)-binding protein 2	PCBP2	16	12	71.5	38.58	72.105			32.8737	32.8157	32.8719	32.8737	32.7653	32.6985	32.6285	32.5933	32.7211	32.1989	32.5038	32.4895
Q15208	Serine/threonine-protein kinase 38	STK38	6	4	18.1	54.19	8.6519			NaN	26.53	NaN	NaN	26.4282	NaN	NaN	NaN	27.2262	27.0914	26.6595	27.141
Q14764	Major vault protein	MVP	21	21	33.3	99.326	62.956			26.8142	27.4629	28.0296	NaN	27.9088	27.0813	30.4919	30.4727	29.8203	30.2193	30.1724	29.6881
O15116	U6 snRNA-associated Sm-like protein LSm1	LSM1	4	4	30.1	15.179	3.1149			26.4984	26.0041	26.4984	25.989	NaN	NaN	26.7771	NaN	NaN	26.4815	26.5898	NaN
P41226	Ubiquitin-like modifier-activating enzyme 7	UBA7	7	7	11	111.69	73.192			26.9316	27.2353	27.5898	26.976	27.4862	27.5463	27.3662	27.509	NaN	27.3066	27.1604	27.1115
Q14152	Eukaryotic translation initiation factor 3 subunit A	EIF3A	44	44	34.1	166.57	323.31			32.5527	32.5132	32.4359	32.4654	32.3463	32.2365	32.393	32.3828	32.4083	32.2814	32.1331	32.0316
Q15633	RISC-loading complex subunit TARBP2	TARBP2	6	6	22.1	39.039	10.798			NaN	NaN	NaN	27.3494	27.0711	NaN	27.7708	27.4785	27.7389	NaN	27.4394	27.4154
P61353	60S ribosomal protein L27	RPL27	7	7	48.5	15.798	27.078			31.9643	31.6501	31.8755	31.5481	31.7006	31.6154	31.8385	31.9505	31.9539	31.015	31.781	32.0414
Q8N806	Putative E3 ubiquitin-protein ligase UBR7	UBR7	10	10	38.8	47.998	61.579			28.509	28.5969	28.632	28.6697	28.6764	28.8173	28.17	27.8916	28.1984	27.6595	27.7389	28.1164
P35610	Sterol O-acyltransferase 1	SOAT1	4	4	7.8	64.734	62.238			27.4473	NaN	27.5609	27.1604	27.3153	27.3324	NaN	27.0813	27.5969	NaN	NaN	27.1214
Q9NQ55	Suppressor of SWI4 1 homolog	PPAN	6	6	24.7	53.193	73.34			27.1214	NaN	26.6998	26.9088	26.5345	26.3273	NaN	NaN	26.7517	NaN	NaN	26.515
Q14185	Dedicator of cytokinesis protein 1	DOCK1	13	13	9.5	215.34	16.023			26.2944	26.2607	26.1681	25.9955	26.4089	26.2463	26.433	26.346	26.5359	NaN	26.2926	26.1055
Q13148	TAR DNA-binding protein 43	TARDBP	10	10	36.5	44.739	70.408			30.5844	30.4629	30.5109	30.6022	30.4823	30.5573	30.2193	30.3828	30.3088	29.3683	30.196	30.4334
P78371	T-complex protein 1 subunit beta	CCT2	36	36	78.1	57.488	323.31			34.4458	34.4519	34.3101	34.4272	34.4272	34.1753	33.6944	33.7353	33.8042	33.6735	33.4581	33.3828
Q27J81	Inverted formin-2	INF2	25	25	34.8	135.62	239.79			29.6128	29.877	30.0737	29.5862	29.8096	29.8279	29.6747	29.5407	29.8843	29.3346	29.2803	29.747
P62857	40S ribosomal protein S28	RPS28	4	4	40.6	7.8409	96.568			31.5799	31.2703	31.611	31.5709	31.525	31.1604	31.3982	31.6756	31.6629	31.3828	30.933	31.6415
Q96F81	Protein dispatched homolog 1	DISP1	4	4	6	170.93	18.045			NaN	25.9539	NaN	26.2553	26.1469	NaN	NaN	25.433	26.1095	NaN	NaN	25.5754
Q9Y316	Protein MEMO1	MEMO1	10	10	61.6	33.733	56.734			29.7421	28.906	30.0609	29.509	29.1239	30.2647	28.8534	27.9088	26.1852	26.4831	27.9031	28.3662
Q16775	Hydroxyacylglutathione hydrolase, mitochondrial	HAGH	7	7	34.1	33.805	19.428			27.8974	27.9869	27.9372	27.9814	28.2216	28.019	28.5352	28.5969	28.267	28.4976	27.8974	28.2535
P12268	Inosine-5-monophosphate dehydrogenase 2	IMPDH2	21	21	47.7	55.804	135.67			31.9365	31.8829	31.7453	31.7613	31.7533	31.6242	31.3879	31.2924	31.1177	31.2422	30.9814	30.8608
O95163	Elongator complex protein 1	IKBKAP	16	16	18	150.25	103.01			27.4394	27.5754	27.7453	27.4314	27.524	27.4473	27.8504	27.8203	27.8019	27.7708	27.632	27.3324
O75083	WD repeat-containing protein 1	WDR1	27	27	64.4	66.193	323.31			33.2178	33.4702	33.6629	33.1798	33.5754	33.5867	34.0266	34.0101	34.0911	33.4702	33.9153	33.9848
O14656	Torsin-1A	TOR1A	7	7	26.5	37.808	9.6188			26.8504	26.6458	26.7129	26.9316	26.7389	26.5463	27.5463	27.5463	27.9146	NaN	27.5463	27.341
O43815	Striatin	STRN	17	16	36.3	86.131	39.486			28.8294	29.2147	28.9031	28.8682	29.1819	28.5128	28.4354	27.9705	28.189	26.8019	NaN	28.6146
Q69YN4	Protein virilizer homolog	KIAA1429	8	8	7.9	202.02	24.653			26.0914	26.1469	26.391	26.524	26.17	26.3477	26.0148	26.7895	25.8881	26.0567	NaN	NaN
P31947	14-3-3 protein sigma	SFN	3	1	10.5	27.774	2.4304			NaN	27.5165	27.632	27.9977	NaN	NaN	26.5419	NaN	NaN	NaN	26.2961	26.3204
Q7LG56	Ribonucleoside-diphosphate reductase subunit M2 B	RRM2B	8	5	28.2	40.736	5.7603			NaN	NaN	26.2058	25.7517	26.0233	26.0084	26.8741	26.976	26.7129	NaN	NaN	26.632
Q00978	Interferon regulatory factor 9	IRF9	2	2	11.5	43.696	8.9947			NaN	NaN	25.965	NaN	NaN	25.9338	25.8811	NaN	NaN	NaN	25.5638	25.726
P00750	Tissue-type plasminogen activator;Tissue-type plasminogen activator chain A;Tissue-type plasminogen activator chain B	PLAT	24	24	53.4	62.916	211.88			32.1146	31.3568	31.362	32.2478	31.9081	31.6198	32.0184	32.015	31.8829	31.7047	31.717	31.8004
Q8IX01	SURP and G-patch domain-containing protein 2	SUGP2	18	18	31.1	120.21	88.559			28.6181	28.5898	28.5203	28.6216	28.6424	28.5969	29.2353	29.2467	29.2759	28.0557	29.3282	29.3431
A6NDU8	UPF0600 protein C5orf51	C5orf51	7	7	41.2	33.62	40.742			28.8534	28.5014	28.6389	29.0111	28.8564	28.8019	28.7517	28.7129	28.7833	NaN	28.3828	28.6424
P26639	Threonine--tRNA ligase, cytoplasmic	TARS	42	42	58	83.434	314.07			33.5867	33.5641	33.5412	33.5978	33.4702	33.4823	33.6415	33.6415	33.4943	33.3436	33.4702	33.2759
Q9NRG9	Aladin	AAAS	15	15	40.7	59.573	48.997			29.537	29.3303	29.2891	29.4551	29.362	29.3131	29.189	29.0839	29.4765	NaN	28.7195	29.2825
O60256	Phosphoribosyl pyrophosphate synthase-associated protein 2	PRPSAP2	12	11	45.3	40.925	53.726			28.8173	28.8534	28.9117	28.9787	29.027	28.8916	29.4668	29.4113	29.2602	28.9896	29.2935	29.1556
Q99471	Prefoldin subunit 5	PFDN5	8	8	61.7	17.328	28.206			29.7486	29.7973	29.7096	29.6578	29.5844	29.5222	29.2077	29.2216	29.019	28.7292	28.9316	29.0839
O43488	Aflatoxin B1 aldehyde reductase member 2	AKR7A2	8	8	30.6	39.589	74.527			31.2019	30.7692	30.9259	31.6066	31.0017	31.2019	31.2422	31.0414	30.8234	30.4334	30.8608	31.08
Q8NB90	Spermatogenesis-associated protein 5	SPATA5	5	4	8.8	97.903	16.946			NaN	26.1332	26.2002	26.3307	26.2151	26.2262	26.0401	25.3712	NaN	NaN	25.2133	25.7645
Q9BZE9	Tether containing UBX domain for GLUT4	ASPSCR1	8	8	25.9	60.182	16.568			26.9428	26.9539	27.0505	27.1507	26.8741	27.1312	27.019	27.2891	27.0084	NaN	26.8741	26.8858
P04920	Anion exchange protein 2	SLC4A2	6	6	11.1	137.01	57.524			NaN	NaN	NaN	NaN	NaN	NaN	26.189	NaN	NaN	NaN	NaN	25.9606
Q9NRX4	14 kDa phosphohistidine phosphatase	PHPT1	7	7	64	13.832	34.091			29.0965	29.249	29.104	29.2557	29.3869	29.2512	31.2647	31.341	30.8534	30.2759	31.3033	31.0609
Q53H82	Beta-lactamase-like protein 2	LACTB2	10	10	48.6	32.805	81.736			29.6146	30.099	29.9259	29.8711	30.1483	30.0479	27.965	28.3109	28.1747	27.0505	28.1604	28.2891
Q99832	T-complex protein 1 subunit eta	CCT7	34	34	68	59.366	323.31			33.6415	33.6198	33.4083	33.5978	33.5296	33.3956	32.8023	32.8347	32.779	32.5933	32.6586	32.4751
Q9BWJ5	Splicing factor 3B subunit 5	SF3B5	5	5	59.3	10.135	41.832			30.5481	29.9259	30.2979	30.4727	30.0609	30.2647	29.6981	29.57	29.3174	27.3578	29.55	29.9539
P67870	Casein kinase II subunit beta	CSNK2B	6	6	37.2	24.942	39.882			29.632	29.5296	29.6268	29.7802	29.524	29.4234	29.4453	29.3023	29.4394	29.258	28.9512	29.2825
Q6P1K2	Polyamine-modulated factor 1	PMF1	3	3	22	23.339	6.8314			26.9088	26.8504	26.726	26.965	26.9977	27.189	26.7389	NaN	26.7771	NaN	NaN	26.5285
P20645	Cation-dependent mannose-6-phosphate receptor	M6PR	5	5	25.3	30.993	7.8787			28.8829	28.9174	28.8858	28.8445	29.1337	28.7895	28.8829	29.2216	29.0349	28.9117	28.805	28.7676
O14974	Protein phosphatase 1 regulatory subunit 12A	PPP1R12A	17	17	24.5	115.28	67.386			29.1507	29.2399	29.1819	29.1507	28.9539	29.1459	29.7565	30.0479	29.8474	29.6663	29.6595	29.6747
Q9Y2D5	A-kinase anchor protein 2	AKAP2	7	7	16.1	94.659	187.63			27.4473	27.9203	27.9428	27.5754	27.8623	27.9031	28.1164	27.6798	28.4551	NaN	NaN	27.8974
Q6IN85	Serine/threonine-protein phosphatase 4 regulatory subunit 3A	SMEK1	17	13	29.5	95.367	78.167			31.1724	31.1901	31.341	30.947	30.9814	31.2365	30.7373	30.6458	31.0673	31.0084	30.4823	30.2077
Q9UK76	Hematological and neurological expressed 1 protein;Hematological and neurological expressed 1 protein, N-terminally processed	HN1	6	6	69.5	16.014	39.854			30.7373	30.8682	30.8534	30.6285	30.4727	30.4334	29.3869	29.0296	29.3324	NaN	NaN	29.0349
Q14669	E3 ubiquitin-protein ligase TRIP12	TRIP12	24	24	19.1	220.43	89.945			28.5463	28.7096	28.9203	28.3109	28.3109	28.4746	29.2054	29.3473	29.3388	29.0965	29.0375	29.0965
Q04446	1,4-alpha-glucan-branching enzyme	GBE1	9	9	21.9	80.473	18.882			27.8445	27.3828	27.611	27.5754	27.5682	27.5682	28.2759	28.249	27.8974	NaN	27.9977	27.8564
P61221	ATP-binding cassette sub-family E member 1	ABCE1	18	18	37.4	67.314	152.32			31.6329	31.5062	31.4433	31.5664	31.4334	31.3776	31.3356	31.2814	31.3776	31.0927	31.0927	31.1422
CON__Streptavidin			5	5	50.6	16.622	262.78		+	33.2619	33.3169	33.3568	33.0381	33.0911	33.2897	32.2563	30.9259	30.611	29.2007	32.2563	30.7613
P39880	Homeobox protein cut-like 1	CUX1	15	7	17	164.19	44.765			27.9259	27.8623	28.0711	27.9923	27.8142	27.8974	28.0401	27.8264	28.2759	27.5682	27.9428	27.976
Q5T9L3	Protein wntless homolog	WLS	7	7	13.5	62.253	9.9722			28.6146	29.1459	29.3088	27.9259	29.1015	28.9146	27.9088	28.6355	29.362	27.3745	28.1652	29.3662
P35612	Beta-adducin	ADD2	10	10	23.1	80.853	39.316			28.003	28.0762	28.1459	27.8142	27.9203	28.1652	27.9595	27.8916	27.9316	NaN	27.6663	27.7453
Q9NUL3	Double-stranded RNA-binding protein Staufen homolog 2	STAU2	10	10	24.7	62.608	23.813			27.3153	27.2353	27.4629	27.0813	27.1312	27.0505	27.4785	27.5754	27.6595	NaN	NaN	27.3578
P23229	Integrin alpha-6;Integrin alpha-6 heavy chain;Integrin alpha-6 light chain;Processed integrin alpha-6	ITGA6	14	14	16.7	126.6	21.052			26.8741	26.7389	26.7895	27.1795	26.8623	26.726	27.3745	27.6389	27.0813	26.7517	27.4629	27.189
P61289	Proteasome activator complex subunit 3	PSME3	7	7	29.9	29.506	51.63			30.1239	29.9677	30.0609	29.9814	29.6948	29.9117	29.8755	29.6005	29.5933	29.5518	29.3196	29.5481
Q8NB37	Parkinson disease 7 domain-containing protein 1	PDDC1	5	5	44.5	23.297	12.865			NaN	25.8599	25.7415	NaN	25.6757	26.0359	26.2821	26.2856	26.3894	NaN	NaN	26.1015
O94973	AP-2 complex subunit alpha-2	AP2A2	19	13	28.4	103.96	25.743			28.141	28.0349	28.17	28.2262	27.5609	28.2077	29.0217	29.0243	28.9372	27.9203	29.1115	29.0243
Q08209	Serine/threonine-protein phosphatase 2B catalytic subunit alpha isoform	PPP3CA	9	5	24.2	58.687	20.371			28.9484	29.0711	28.8623	28.8799	28.8887	28.8564	29.1984	29.21	29.391	29.1459	28.976	29.027
P51114	Fragile X mental retardation syndrome-related protein 1	FXR1	26	25	51.4	69.72	282.88			32.3061	32.2478	32.1544	32.0864	31.995	31.9848	31.6964	31.6839	31.9188	31.5389	31.5014	31.6198
P46934	E3 ubiquitin-protein ligase NEDD4	NEDD4	3	2	3.4	149.11	7.1222			NaN	25.3679	25.6971	25.3545	25.3975	NaN	25.772	25.5075	NaN	NaN	NaN	25.4298
P53367	Arfaptin-1	ARFIP1	9	9	41.6	41.738	96.713			28.604	28.5165	28.7096	28.604	28.6629	28.726	29.1263	29.1435	29.0583	28.4154	29.1507	29.019
Q2NL82	Pre-rRNA-processing protein TSR1 homolog	TSR1	15	15	29.6	91.809	79.46			29.6898	29.5184	29.6128	29.6005	29.4842	29.6285	29.6458	29.4746	29.6612	29.1263	29.4842	29.5071
Q5T0D9	Tumor protein p63-regulated gene 1-like protein	TPRG1L	3	3	23.5	30.211	33.132			26.604	26.673	26.4738	26.6998	NaN	NaN	26.5754	26.632	26.673	NaN	26.3511	26.4769
Q96S59	Ran-binding protein 9	RANBP9	8	8	14	77.846	22.376			27.8081	27.4234	27.3992	27.4629	27.217	27.1507	27.6998	27.7325	27.509	27.611	27.2445	NaN
Q86SF2	N-acetylgalactosaminyltransferase 7	GALNT7	31	31	58.9	75.388	266.48			31.6242	31.2979	31.2979	31.7292	31.4532	31.4483	32.6944	32.6881	32.5618	32.4309	32.4799	32.3982
P49841	Glycogen synthase kinase-3 beta	GSK3B	5	5	22.6	46.744	24.042			26.5667	26.8741	26.9869	26.5754	26.3494	26.8142	26.4202	26.4769	26.673	26.558	26.3494	25.9825
Q92574	Hamartin	TSC1	12	12	19.8	129.77	45.382			26.9088	27.217	26.976	26.4394	26.726	26.726	26.9428	26.976	27.2979	NaN	NaN	26.8741
Q9NZ32	Actin-related protein 10	ACTR10	11	11	41	46.306	54.941			27.6251	27.8019	27.6458	27.8142	27.8974	27.5463	27.9869	27.7195	27.524	27.673	27.4473	27.509
Q92538	Golgi-specific brefeldin A-resistance guanine nucleotide exchange factor 1	GBF1	35	35	32.3	206.44	141.53			30.4532	30.5573	30.5481	30.196	30.4334	30.5933	30.5573	30.6544	30.4919	30.362	30.4727	30.2308
P09972	Fructose-bisphosphate aldolase C	ALDOC	16	11	54.4	39.455	216.49			32.8719	32.8792	32.686	32.87	32.9099	32.7985	32.9277	32.9746	32.6881	32.6176	32.8737	32.4507
P21283	V-type proton ATPase subunit C 1	ATP6V1C1	9	8	28.5	43.941	106.3			28.2979	28.3109	28.3787	28.2935	28.2535	28.3196	28.8653	28.9732	28.7162	28.6181	28.7802	28.524
Q9H9A6	Leucine-rich repeat-containing protein 40	LRRC40	15	15	35	68.249	41.808			29.389	29.104	29.1676	28.8711	28.976	29.1361	27.4551	26.6181	27.6458	26.5195	NaN	27.5014
P50991	T-complex protein 1 subunit delta	CCT4	29	29	55.5	57.924	323.31			33.7553	33.7946	33.6944	33.7353	33.6735	33.6415	32.9382	32.947	32.9505	32.9259	32.7292	32.5179
Q92747	Actin-related protein 2/3 complex subunit 1A	ARPC1A	12	11	49.5	41.569	77.686			27.509	27.4234	28.2262	27.2714	26.976	27.9869	29.9814	29.1842	29.4957	28.9787	29.747	29.3196
Q2M389	WASH complex subunit 7	KIAA1033	11	11	15	136.4	101.62			27.3494	NaN	27.6458	27.3494	27.6865	27.5536	28.1937	27.965	27.8974	27.4862	28.2535	27.5754
Q13442	28 kDa heat- and acid-stable phosphoprotein	PDAP1	10	10	45.9	20.63	95.201			29.8127	29.9814	29.9677	29.8638	29.94	29.6713	30.0737	29.8096	30.1483	29.9259	29.5463	29.9259
Q9NWQ8	Phosphoprotein associated with glycosphingolipid-enriched microdomains 1	PAG1	10	10	47.9	46.98	100.79			27.6865	28.509	28.4629	27.5609	28.3109	28.3869	27.5969	NaN	28.258	NaN	27.3662	28.066
Q9Y666	Solute carrier family 12 member 7	SLC12A7	19	18	23.3	119.1	131.5			29.4785	29.389	29.1866	29.0111	29.2445	28.8355	29.461	29.5333	29.4919	29.4093	29.2869	29.1532
P48643	T-complex protein 1 subunit epsilon	CCT5	36	36	74.1	59.67	323.31			34.3892	34.3892	34.2689	34.3633	34.2549	34.1377	33.5179	33.6088	33.6522	33.5412	33.3303	33.2759
Q9BTU6	Phosphatidylinositol 4-kinase type 2-alpha	PI4K2A	6	6	23.4	54.022	21.205			NaN	26.5045	NaN	NaN	NaN	NaN	NaN	26.8858	26.9316	NaN	26.8019	26.5898
Q08379	Golgin subfamily A member 2	GOLGA2	19	19	30	113.08	73.281			27.217	27.0609	27.6181	26.2768	26.9977	NaN	29.0243	29.0889	29.1164	28.6629	28.6798	29.2007
P47712	Cytosolic phospholipase A2;Phospholipase A2;Lysophospholipase	PLA2G4A	18	18	32.7	85.238	58.153			30.0609	29.6337	30.0864	30.0084	29.3599	29.8916	30.0479	30.1842	30.2869	30.0864	29.9259	29.8959
Q7Z2W4	Zinc finger CCCH-type antiviral protein 1	ZC3HAV1	29	29	47.8	101.43	323.31			30.947	30.9117	30.8385	30.5664	30.6713	30.5664	30.7211	30.8004	30.8755	30.5203	30.6198	30.6285
Q8N8A2	Serine/threonine-protein phosphatase 6 regulatory ankyrin repeat subunit B	ANKRD44	9	9	16	107.6	9.2304			26.1214	NaN	NaN	26.3427	NaN	NaN	26.2408	26.5551	NaN	26.4488	NaN	25.8974
Q8WU76	Sec1 family domain-containing protein 2	SCFD2	3	3	5.4	75.126	10.473			NaN	NaN	NaN	25.0233	NaN	25.3975	25.7517	25.6153	25.8576	25.6568	25.7441	25.141
Q14155	Rho guanine nucleotide exchange factor 7	ARHGEF7	8	8	17.8	90.011	29.936			27.6458	27.4938	27.5609	27.3324	27.5898	27.7129	28.3109	28.3109	28.258	27.9539	28.0965	28.1984
P54764	Ephrin type-A receptor 4	EPHA4	9	6	14.4	109.86	25.525			NaN	NaN	NaN	25.7517	26.3477	26.5285	26.976	26.8385	26.1391	NaN	26.4862	NaN
A0FGR8	Extended synaptotagmin-2	ESYT2	23	23	37.6	102.36	151.58			29.7597	29.611	29.7629	29.6389	29.6964	29.7549	30.2869	30.4334	30.5933	30.0864	30.2869	30.3196
Q9BXJ9	N-alpha-acetyltransferase 15, NatA auxiliary subunit	NAA15	30	26	42.4	101.27	151.4			31.1842	31.1177	31.0217	31.0217	30.7849	30.846	30.8608	30.8234	30.933	30.7849	30.5573	30.6458
P26641	Elongation factor 1-gamma	EEF1G	25	25	68.6	50.118	275.77			34.5238	34.4763	34.4581	34.4396	34.2828	34.3033	34.4823	34.4083	34.4519	34.1604	34.2048	34.3633
Q9Y6E2	Basic leucine zipper and W2 domain-containing protein 2	BZW2	11	10	23.2	48.162	45.412			29.4707	29.1604	29.1459	29.2935	28.995	28.7581	29.2979	28.94	29.3109	29.3153	28.9567	28.604
P54577	Tyrosine--tRNA ligase, cytoplasmic;Tyrosine--tRNA ligase, cytoplasmic, N-terminally processed	YARS	37	37	70.1	59.143	303.27			32.7514	32.5296	32.3698	32.8385	32.4654	32.3489	33.8328	33.7849	33.5754	33.4458	33.6629	33.4702
Q9P0V9	Septin-10	2020-09-10	10	9	34.4	52.592	46.687			27.5826	27.9372	27.8324	27.6251	27.6798	27.6527	28.267	28.0557	28.1065	27.632	27.9203	28.217
Q6PJG6	BRCA1-associated ATM activator 1	BRAT1	14	14	27.3	88.118	36.543			27.8564	27.7325	27.632	27.7895	27.8974	27.5969	27.5463	27.2445	27.7833	NaN	27.2445	27.4314
Q96RD7	Pannexin-1	PANX1	2	2	9.4	48.05	8.355			25.1795	NaN	NaN	25.2207	25.1214	NaN	25.8019	26.0105	NaN	25.7441	NaN	25.6703
O00148	ATP-dependent RNA helicase DDX39A	DDX39A	15	7	51.8	49.129	138.84			29.6948	29.8872	29.8004	29.8843	29.9117	29.8157	28.673	28.8445	28.94	NaN	28.5933	28.6492
Q9NWT6	Hypoxia-inducible factor 1-alpha inhibitor	HIF1AN	4	4	21.8	40.285	53.032			NaN	26.0212	NaN	25.976	NaN	25.7895	NaN	NaN	25.8142	NaN	25.6125	NaN
Q9NTJ3	Structural maintenance of chromosomes protein 4	SMC4	23	23	23.1	147.18	109.57			29.1913	29.1556	28.9923	29.2399	29.1337	29.0583	28.2399	28.3239	28.4314	28.203	27.8324	28.3196
P78344	Eukaryotic translation initiation factor 4 gamma 2	EIF4G2	28	28	44.2	102.36	323.31			30.8755	30.9814	30.6881	30.6798	30.5109	30.341	30.7292	30.9117	31.015	30.8974	30.6798	30.4532
P49815	Tuberin	TSC2	14	14	13.5	200.61	60.816			27.4073	27.8324	27.7517	27.3662	27.7895	27.5682	27.509	27.611	27.8081	27.4314	27.3745	27.5389
Q9H299	SH3 domain-binding glutamic acid-rich-like protein 3	SH3BGRL3	3	3	32.3	10.438	7.8034			29.4433	29.8065	29.5315	NaN	29.5591	29.5333	29.3641	29.4354	29.3044	NaN	29.2736	29.0557
Q96JG6	Coiled-coil domain-containing protein 132	CCDC132	8	8	12	111.17	16.19			26.1738	NaN	26.2317	26.6998	26.4877	NaN	26.965	26.7645	26.3943	NaN	26.5754	26.4785
P51808	Dynein light chain Tctex-type 3	DYNLT3	3	3	64.7	13.062	13.811			NaN	NaN	NaN	NaN	NaN	26.0148	27.8623	27.8858	28.0243	NaN	27.7895	27.6595
P52597	Heterogeneous nuclear ribonucleoprotein F;Heterogeneous nuclear ribonucleoprotein F, N-terminally processed	HNRNPF	16	14	64.3	45.671	186.53			32.341	32.0864	32.1208	32.3515	32.2308	32.2048	31.933	31.8497	31.9365	31.7888	31.6329	31.7006
Q8ND82	Zinc finger protein 280C	ZNF280C	12	11	22.4	83.095	11.539			26.8623	NaN	26.6595	26.8858	26.3745	26.604	NaN	NaN	26.17	NaN	NaN	25.9716
Q96T51	RUN and FYVE domain-containing protein 1	RUFY1	11	11	25.1	79.817	54.421			28.0349	28.1795	27.7645	27.604	28.2353	27.5898	29.066	29.1507	29.3848	28.9869	28.9344	29.099
P23921	Ribonucleoside-diphosphate reductase large subunit	RRM1	31	31	55.8	90.069	202.28			31.325	30.8901	30.933	31.2135	30.9259	30.9539	32.0017	31.8755	31.9643	31.8571	31.6198	31.7652
Q8NDH3	Probable aminopeptidase NPEPL1	NPEPL1	4	4	18.2	55.86	15.674			26.7895	NaN	26.4969	NaN	26.8974	26.7129	NaN	26.2481	NaN	NaN	26.1623	25.9293
P62854;Q5JNZ5	40S ribosomal protein S26;Putative 40S ribosomal protein S26-like 1	RPS26;RPS26P11	3	3	31.3	13.015	10.619			31.1361	30.94	30.94	31.1052	31.0609	30.9259	30.4433	30.6022	30.6544	29.3848	30.4629	30.8901
Q9UBF2	Coatomer subunit gamma-2	COPG2	30	26	52.2	97.621	238.77			30.3303	30.2422	30.3196	30.4334	30.4629	30.3515	30.9259	31.0283	30.995	30.362	30.933	30.9882
Q9H1A4	Anaphase-promoting complex subunit 1	ANAPC1	5	5	4.6	216.5	4.716			NaN	NaN	NaN	NaN	NaN	NaN	25.3844	NaN	NaN	NaN	25.1871	NaN
P25787	Proteasome subunit alpha type-2	PSMA2	7	7	44.9	25.898	106.65			31.0544	30.7047	31.1604	31.0217	30.8309	31.0927	31.1177	30.7129	30.6285	29.8726	30.9746	30.846
P11940	Polyadenylate-binding protein 1	PABPC1	31	22	64.2	70.67	283.79			34.1529	34.1828	34.0911	33.9848	33.9591	33.8138	33.9591	33.9591	33.9242	33.9063	33.7252	33.6198
Q9BVI4	Nucleolar complex protein 4 homolog	NOC4L	9	9	31	58.467	28.833			27.2891	26.9428	26.7129	27.391	26.976	27.189	27.2803	27.5898	27.604	NaN	27.4073	27.189
Q9Y295	Developmentally-regulated GTP-binding protein 1	DRG1	8	8	28.9	40.542	185.43			29.0084	28.9146	28.7292	28.6561	28.6216	28.391	28.9484	28.9484	29.0813	29.1263	28.7031	28.4976
P49750	YLP motif-containing protein 1	YLPM1	11	11	9.6	241.64	17.235			27.611	27.4938	27.8385	27.5014	27.7645	27.5609	27.0609	NaN	26.8974	NaN	NaN	26.7895
P49137	MAP kinase-activated protein kinase 2	MAPKAPK2	7	7	25.5	45.567	19.571			27.9484	28.0505	27.9814	28.003	27.6865	27.7833	28.2759	28.2979	28.003	NaN	27.8741	28.1263
P17612	cAMP-dependent protein kinase catalytic subunit alpha	PRKACA	8	3	29.1	40.589	6.4133			27.604	27.7129	27.7581	27.2714	27.611	27.4785	27.217	NaN	27.1115	NaN	NaN	26.976
P11413	Glucose-6-phosphate 1-dehydrogenase	G6PD	23	23	60.8	59.256	122.53			30.9609	30.7292	30.8234	31.0544	30.846	30.9609	31.08	30.8974	30.8608	30.6372	30.6964	30.9259
Q9UKD2	mRNA turnover protein 4 homolog	MRTO4	14	14	59	27.56	91.717			29.995	29.708	29.8608	30.099	29.8309	29.7341	29.2147	29.189	29.6058	28.5536	29.2781	29.4842
Q9NUQ6	SPATS2-like protein	SPATS2L	17	17	46.6	61.728	116.89			29.2054	29.6372	29.6964	28.8887	29.4881	29.4551	30.2759	30.196	30.611	30.3515	30.0217	30.1483
O43795	Unconventional myosin-Ib	MYO1B	17	17	22.4	131.98	58.861			28.9316	29.0003	28.249	28.6146	28.7195	28.5718	29.027	28.9896	29.5536	28.3951	29.0686	29.4274
Q9Y5P4	Collagen type IV alpha-3-binding protein	COL4A3BP	10	10	27.1	70.834	45.028			27.8142	27.8203	27.8682	28.0453	27.976	27.9088	27.6865	27.4473	27.8741	NaN	27.0609	27.8203
Q9NWU2	Glucose-induced degradation protein 8 homolog	GID8	8	8	62.7	26.748	48.652			28.7645	28.391	28.1842	28.8682	28.0609	28.2445	28.55	28.5862	28.6931	28.3023	28.5352	NaN
P08670	Vimentin	VIM	52	48	85.4	53.651	323.31			35.595	36.3568	36.365	35.1641	36.2549	36.2478	34.7453	34.7252	35.043	34.78	34.6198	34.5584
P35269	General transcription factor IIF subunit 1	GTF2F1	7	7	16.4	58.24	70.189			27.8019	27.4314	NaN	27.5014	27.4073	27.5609	27.6865	27.5014	27.8203	27.7771	27.1214	NaN
O43399	Tumor protein D54	TPD52L2	10	10	67	22.237	235.7			31.5343	31.7927	31.5435	31.5573	31.8081	31.7047	31.2422	31.1361	31.5527	31.2924	31.0017	31.0864
Q96KG9	N-terminal kinase-like protein	SCYL1	19	19	35.8	89.63	58.784			29.1866	29.3494	29.4433	29.019	29.3515	29.537	29.3088	29.2935	29.4512	29.3303	29.0479	29.099
O00154	Cytosolic acyl coenzyme A thioester hydrolase	ACOT7	10	10	32.9	41.796	31.407			31.1544	30.8829	30.7453	30.8829	30.8901	30.7211	30.0479	30.1842	30.2193	30.0349	29.9814	29.8741
Q8N3C0	Activating signal cointegrator 1 complex subunit 3	ASCC3	9	9	5.7	251.46	13.35			26.239	26.3511	26.189	26.3975	26.1604	26.2643	26.2151	26.3427	26.1738	NaN	26.0567	NaN
Q9Y2X0	Mediator of RNA polymerase II transcription subunit 16	MED16	5	5	7.2	96.792	9.5935			NaN	25.9606	26.1194	NaN	NaN	26.3014	26.002	NaN	NaN	NaN	25.8142	NaN
O95071	E3 ubiquitin-protein ligase UBR5	UBR5	15	15	8.3	309.35	50.072			27.5898	27.3578	27.6527	27.4707	NaN	27.6389	27.391	27.7517	27.3578	27.5165	NaN	27.1015
O43252	Bifunctional 3-phosphoadenosine 5-phosphosulfate synthase 1;Sulfate adenylyltransferase;Adenylyl-sulfate kinase	PAPSS1	19	18	46.3	70.832	115.67			30.9539	30.9117	30.8974	30.8157	30.4727	30.6372	31.5389	31.4727	31.4184	31.4234	30.9882	31.4134
Q06203	Amidophosphoribosyltransferase	PPAT	12	12	35.4	57.398	28.947			29.1628	28.8355	28.7292	29.3787	28.9203	28.8142	29.8249	29.7178	29.6898	29.8623	29.4294	29.3239
Q13362	Serine/threonine-protein phosphatase 2A 56 kDa regulatory subunit gamma isoform	PPP2R5C	12	6	27.3	61.06	9.7184			26.9977	27.1604	27.0914	26.8974	27.0296	27.0914	26.8504	26.9539	26.8264	NaN	NaN	26.6865
Q12792	Twinfilin-1	TWF1	13	12	40.9	40.282	95.285			30.341	30.4032	30.2647	30.4433	30.3724	30.2193	30.7373	30.6629	30.6881	30.8157	30.2647	30.393
Q8TAT6	Nuclear protein localization protein 4 homolog	NPLOC4	20	20	45.7	68.119	108.51			30.2647	30.4727	30.8004	30.1604	30.5109	30.7129	30.2077	30.2869	30.3196	29.8415	30.1239	30.2647
P48739	Phosphatidylinositol transfer protein beta isoform	PITPNB	15	14	62.4	31.54	120.55			29.9259	29.94	29.8564	29.995	29.8829	29.8294	30.099	30.0217	29.8785	29.4194	30.0349	29.9259
Q969S3	Zinc finger protein 622	ZNF622	5	5	16.8	54.271	9.3711			25.9406	NaN	NaN	26.0127	NaN	NaN	NaN	NaN	26.4645	NaN	26.3877	26.1604
Q8TBC4	NEDD8-activating enzyme E1 catalytic subunit	UBA3	14	14	49.9	51.852	122.56			29.6233	29.4214	29.6595	29.6527	29.7211	29.8901	29.2054	29.1065	29.1771	28.3324	28.8887	29.4823
O00303	Eukaryotic translation initiation factor 3 subunit F	EIF3F	10	10	31.9	37.563	31.58			30.4532	30.4629	30.4532	30.4532	30.4032	30.5109	30.4334	30.4032	30.3724	30.1483	30.2869	30.2193
Q9Y5K5	Ubiquitin carboxyl-terminal hydrolase isozyme L5	UCHL5	12	12	47.1	37.606	44.506			29.2285	28.9896	29.0531	29.1507	29.1724	29.0057	28.6964	28.5573	28.6697	NaN	28.3787	28.5315
Q99816	Tumor susceptibility gene 101 protein	TSG101	10	10	28.7	43.944	21.117			28.1984	28.2803	28.0965	28.1984	28.2535	28.3828	28.4113	28.1937	28.2445	28.1459	28.0762	28.0813
Q6NXE6	Armadillo repeat-containing protein 6	ARMC6	7	7	21.6	54.141	16.196			27.5536	NaN	27.509	27.6865	27.4234	27.3745	27.4707	27.4938	27.3828	27.3239	27.0914	27.3662
Q9H300	Presenilins-associated rhomboid-like protein, mitochondrial;P-beta	PARL	2	2	8.2	42.19	2.8705			26.7645	26.7129	26.8741	26.6865	26.3528	26.604	NaN	26.6595	NaN	26.604	NaN	26.3545
P62136	Serine/threonine-protein phosphatase PP1-alpha catalytic subunit	PPP1CA	21	7	71.2	37.512	185.09			32.8062	32.665	32.7712	32.7393	32.5343	32.6132	32.686	32.4799	32.6329	32.2019	32.393	32.6307
Q9Y296	Trafficking protein particle complex subunit 4	TRAPPC4	4	4	22.8	24.34	4.4036			25.5014	25.5754	25.632	NaN	25.275	25.8457	25.9157	NaN	25.3679	NaN	NaN	25.4831
Q9UQ13	Leucine-rich repeat protein SHOC-2	SHOC2	5	5	15.1	64.887	28.744			26.8385	26.6458	NaN	NaN	26.604	NaN	NaN	NaN	26.8504	NaN	26.8974	26.391
A2RRP1	Neuroblastoma-amplified sequence	NBAS	9	9	5.6	268.57	11.124			26.0062	25.5725	25.7077	25.6622	26.0359	25.989	26.217	26.0691	26.2463	NaN	25.9406	26.0526
Q9Y6F6	Protein MRVI1	MRVI1	8	8	12.6	97.929	33.964			25.8409	26.0691	26.2114	26.2225	25.9225	26.1371	27.1312	26.9203	27.2714	NaN	NaN	26.9316
P35611	Alpha-adducin	ADD1	21	21	48.2	80.954	101.8			30.6964	30.5296	30.5296	30.4919	30.5296	30.5296	31.4919	31.2422	31.5799	31.0349	31.3088	31.4234
A5YKK6	CCR4-NOT transcription complex subunit 1	CNOT1	40	40	23.6	266.94	114.71			29.8173	29.632	29.6198	29.7517	29.3704	29.55	30.0217	30.0084	29.8218	29.8264	29.837	29.6424
Q9UHD9	Ubiquilin-2	UBQLN2	12	9	32.5	65.695	125.56			28.5315	28.4073	27.8504	28.3869	28.1747	28.1312	28.7613	28.3324	28.7645	28.5646	28.5014	28.2803
P57740	Nuclear pore complex protein Nup107	NUP107	11	11	19.8	106.37	17.532			27.4707	NaN	27.2535	27.5014	27.3324	NaN	NaN	NaN	27.341	NaN	NaN	27.1604
P40763	Signal transducer and activator of transcription 3	STAT3	15	15	33.1	88.067	91.986			28.9456	28.8173	28.6075	28.5682	28.6931	28.6595	29.0057	28.9732	29.0003	28.9539	28.7357	28.7389
P06400	Retinoblastoma-associated protein	RB1	8	8	11.9	106.16	16.603			26.7771	26.5898	26.604	NaN	26.5898	NaN	27.0813	27.0084	27.1984	27.1507	26.8741	26.6998
P07942	Laminin subunit beta-1	LAMB1	41	41	34.7	198.04	323.31			32.7731	32.9347	32.6839	32.5343	32.8062	32.4134	32.1634	32.2222	32.3672	32.1544	32.0673	32.0017
Q14240	Eukaryotic initiation factor 4A-II;Eukaryotic initiation factor 4A-II, N-terminally processed	EIF4A2	26	14	70.5	46.402	120.15			31.5203	31.3303	30.8755	31.4234	31.2535	30.6798	30.8385	30.8682	30.9117	30.8608	30.6964	30.5014
Q3KQU3	MAP7 domain-containing protein 1	MAP7D1	10	10	16.2	92.819	44.153			28.1312	27.9814	28.0084	27.7895	27.8324	27.6931	28.1459	28.3324	28.1604	28.1459	28.1015	27.8564
P08648	Integrin alpha-5;Integrin alpha-5 heavy chain;Integrin alpha-5 light chain	ITGA5	12	12	19.4	114.54	108.44			29.099	29.4881	29.3217	28.7864	29.189	29.2422	29.7373	29.5862	29.6831	29.1866	29.5844	29.6663
Q86V81	THO complex subunit 4	ALYREF	8	8	45.5	26.888	97.388			31.1783	30.7771	31.4083	30.8682	31.099	31.0084	30.8234	30.9259	30.995	29.995	30.7849	31.196
P19525	Interferon-induced, double-stranded RNA-activated protein kinase	EIF2AK2	17	17	33.4	62.094	53.45			29.7895	29.6303	29.6612	29.6075	29.579	29.55	29.4842	29.55	29.5259	29.3683	29.249	29.4113
Q86XP1	Diacylglycerol kinase eta	DGKH	7	7	10.5	134.86	18.207			NaN	NaN	NaN	NaN	NaN	NaN	26.9428	26.632	NaN	NaN	26.604	26.6458
Q15276	Rab GTPase-binding effector protein 1	RABEP1	17	17	27	99.289	70.828			27.9814	28.3745	28.249	28.1842	28.2847	27.9539	28.3745	28.5463	28.3828	28.3704	28.3494	28.0453
P52209	6-phosphogluconate dehydrogenase, decarboxylating	PGD	23	23	64.2	53.139	126.46			32.846	32.6372	32.4967	32.9045	32.7593	32.6415	32.5709	32.6819	32.555	32.5664	32.3033	32.4058
P42167	Lamina-associated polypeptide 2, isoforms beta/gamma;Thymopoietin;Thymopentin	TMPO	19	10	57.7	50.67	95.737			30.5203	29.6781	30.6285	30.4532	30.0864	30.8974	30.1361	30.4032	30.5933	29.2262	30.2193	30.8004
P53602	Diphosphomevalonate decarboxylase	MVD	9	9	32	43.404	20.872			28.4154	NaN	NaN	28.8653	28.3828	28.1263	28.2353	28.249	27.7389	27.8504	27.9316	27.9705
Q86WB0	Nuclear-interacting partner of ALK	ZC3HC1	10	10	34.1	55.261	18.633			27.9372	28.1795	28.5014	28.17	28.0243	28.0084	28.2308	27.7064	28.1015	NaN	27.4707	28.1556
Q9Y263	Phospholipase A-2-activating protein	PLAA	26	26	47	87.156	149.37			30.1239	30.2869	30.3724	30.341	30.2759	30.2979	29.9677	29.94	30.0349	29.8081	29.9117	29.6948
P54920	Alpha-soluble NSF attachment protein	NAPA	8	6	43.4	33.232	37.953			28.7581	28.9117	28.6629	28.7389	28.9896	28.7864	28.6527	28.6458	28.7771	28.3367	28.7195	28.4785
P51398	28S ribosomal protein S29, mitochondrial	DAP3	14	14	42.2	45.566	31.309			29.0557	28.9088	29.1604	29.2869	29.2147	29.1937	28.995	28.9088	29.0084	27.6865	28.9923	29.2781
P55081	Microfibrillar-associated protein 1	MFAP1	6	6	17.1	51.958	60.429			27.17	26.9869	27.0813	27.2979	27.1604	27.0401	26.4614	NaN	26.726	NaN	26.4282	NaN
P53396	ATP-citrate synthase	ACLY	39	39	47.7	120.84	173.12			32.4284	31.9365	31.8974	32.5132	32.0544	31.8755	32.3436	32.1453	32.1177	32.005	32.0316	32.0641
P68402	Platelet-activating factor acetylhydrolase IB subunit beta	PAFAH1B2	6	6	50.2	25.569	88.095			28.9787	28.9088	29.1361	29.1984	29.2239	29.0634	29.2147	29.1842	29.3023	28.5682	29.0453	29.4453
Q9NW64	Pre-mRNA-splicing factor RBM22	RBM22	10	10	33.3	46.895	112.59			28.5014	28.5426	28.6865	28.2891	28.3536	28.4314	27.9814	27.7708	27.9428	27.2891	27.5014	28.2262
Q9BVJ6	U3 small nucleolar RNA-associated protein 14 homolog A	UTP14A	9	9	21.8	87.977	22.088			26.8142	26.6595	26.8974	26.6998	26.6865	26.7645	26.3943	26.2838	26.5898	26.3444	26.2589	26.17
P61163	Alpha-centractin	ACTR1A	14	7	50.5	42.613	255.45			32.0895	31.9045	32.0017	32.0414	32.0381	32.1269	32.005	31.7373	31.9153	31.099	31.9505	31.9505
Q8TBX8	Phosphatidylinositol 5-phosphate 4-kinase type-2 gamma	PIP4K2C	10	10	27.3	47.299	29.975			28.2847	28.4354	28.3023	28.17	28.391	28.3787	28.805	28.7988	29.0349	28.8019	28.6251	28.7096
Q9Y4X5	E3 ubiquitin-protein ligase ARIH1	ARIH1	11	11	31.6	64.117	172.46			28.5463	29.4314	28.9484	28.6629	29.3536	29.0839	26.4154	26.2926	27.1015	NaN	26.067	26.8019
Q9ULV4	Coronin-1C	CORO1C	11	11	31.9	53.248	55.055			31.1783	31.1483	31.2759	30.9609	31.0927	30.995	30.8901	30.8234	31.2135	30.5109	30.8901	31.0017
P18084	Integrin beta-5	ITGB5	15	15	33	88.053	269.89			29.2467	29.2602	29.2512	29.0609	29.3388	29.2077	29.4274	29.673	29.7064	29.3848	29.4492	29.4804
P33991	DNA replication licensing factor MCM4	MCM4	34	34	48	96.557	206.91			31.9609	31.9117	32.0283	32.0283	32.0414	32.0895	31.9435	31.978	32.1115	31.5664	31.8385	32.0832
Q9NRY4	Rho GTPase-activating protein 35	ARHGAP35	30	30	28.8	170.51	129.15			30.099	30.4134	30.4134	29.9677	30.2077	30.3303	30.3515	30.3724	30.2869	30.2759	30.1115	30.1115
O75822	Eukaryotic translation initiation factor 3 subunit J	EIF3J	12	12	28.7	29.062	36.439			29.4862	29.5555	29.5352	29.5407	29.3807	29.2692	29.1337	29.1628	29.1866	28.9372	29.1263	28.906
P61962	DDB1- and CUL4-associated factor 7	DCAF7	4	4	15.2	38.926	6.9729			27.5969	27.0813	27.1984	27.4234	27.2714	27.6865	26.9977	NaN	NaN	NaN	NaN	26.8264
Q9BVG4	Protein PBDC1	PBDC1	8	8	36.1	26.056	111.08			29.4649	29.3578	29.4214	29.341	29.3431	29.196	29.0839	29.1115	29.109	29.0427	28.8564	28.8945
Q12800	Alpha-globin transcription factor CP2	TFCP2	7	5	24.7	57.255	94.252			27.9088	27.7517	28.1556	27.8385	27.8385	27.726	28.0243	27.8203	28.0505	27.6663	NaN	27.9259
O76094	Signal recognition particle subunit SRP72	SRP72	23	23	47.5	74.605	323.31			31.2979	31.2703	31.2479	31.2193	31.196	31.2479	31.1483	31.08	31.2193	30.9677	30.9814	30.995
Q9H3S7	Tyrosine-protein phosphatase non-receptor type 23	PTPN23	17	17	16.9	178.97	30.117			27.5536	27.4629	27.2714	27.1984	27.5165	27.3745	27.8385	27.4234	27.5389	27.5898	27.3066	27.4234
Q9GZM5	Protein YIPF3;Protein YIPF3, 36 kDa form III	YIPF3	5	5	22.9	38.247	19.294			26.5433	26.4676	26.533	26.3014	26.7129	26.726	26.9428	26.3894	26.9869	26.632	NaN	NaN
O43765	Small glutamine-rich tetratricopeptide repeat-containing protein alpha	SGTA	11	11	35.5	34.063	246.8			30.2308	30.2979	30.2077	30.1842	30.2308	30.1724	30.5109	30.6022	30.3303	30.3196	30.3303	30.3196
P07996;CON__Q28194	Thrombospondin-1	THBS1	25	23	32.8	129.38	229.21		+	30.6544	31.1483	30.8385	30.0217	31.2019	30.7849	28.524	29.1628	30.0084	28.9595	28.9814	29.5555
Q53HC9	Protein TSSC1	TSSC1	7	7	29.2	43.603	14.552			27.2535	27.217	27.1507	27.2077	26.9869	27.217	27.217	27.341	27.4234	NaN	27.141	27.189
Q8TCS8	Polyribonucleotide nucleotidyltransferase 1, mitochondrial	PNPT1	21	21	36.8	85.95	66.279			29.6198	29.6915	29.8799	29.9539	29.6948	29.8829	28.8264	29.1065	29.2535	27.189	29.2399	29.4334
Q07157	Tight junction protein ZO-1	TJP1	11	11	11.4	195.46	75.68			27.5754	27.7195	27.8019	27.4938	27.4551	27.6181	27.9031	28.2077	28.0243	NaN	NaN	27.8858
Q05048	Cleavage stimulation factor subunit 1	CSTF1	9	9	35.7	48.357	84.464			29.158	29.0375	29.3536	29.3787	29.1866	29.3951	28.3828	28.524	28.2216	27.1214	28.5315	28.5826
Q01432	AMP deaminase 3	AMPD3	30	30	49.4	88.811	254.03			30.6629	31.1901	31.611	30.9609	31.3303	31.6501	33.5179	33.4209	33.3436	33.1006	33.2897	33.3956
Q9UFC0	Leucine-rich repeat and WD repeat-containing protein 1	LRWD1	11	11	25.2	70.86	39.305			27.8504	27.5014	27.7195	27.5315	27.217	27.2625	27.4629	27.4314	27.4394	27.0084	27.4073	27.391
Q8IYB7	DIS3-like exonuclease 2	DIS3L2	5	5	8.4	99.278	7.6111			NaN	NaN	NaN	NaN	NaN	NaN	26.1055	26.1015	26.1623	NaN	NaN	25.9606
O60739	Eukaryotic translation initiation factor 1b	EIF1B	8	3	80.5	12.823	55.068			29.8264	29.6781	29.6285	29.7357	29.3766	29.4938	28.9002	29.1747	29.1312	28.9622	28.7802	28.9841
Q8WYP5	Protein ELYS	AHCTF1	17	17	12.6	252.5	101.68			27.1214	26.3778	26.7771	27.019	26.4661	26.7771	27.0711	26.9428	27.141	27.1507	26.632	26.8504
Q7KZ85	Transcription elongation factor SPT6	SUPT6H	30	30	28	199.07	201.93			29.7341	29.7373	29.6831	29.4995	29.4746	29.4334	29.0686	29.1771	29.3431	28.7325	29.0864	29.2512
P78524	Suppression of tumorigenicity 5 protein	ST5	4	3	5.3	126.48	6.6676			NaN	NaN	NaN	NaN	NaN	NaN	NaN	NaN	26.065	NaN	NaN	25.9043
Q9BQG0	Myb-binding protein 1A	MYBBP1A	26	26	28.1	148.85	169.21			29.611	29.4274	29.4532	29.5352	29.2376	29.4154	29.7802	29.8534	29.8534	29.8112	29.5844	29.5987
Q99417	C-Myc-binding protein	MYCBP	4	4	55.3	11.967	44.414			29.3828	29.1214	29.1288	29.362	29.109	29.2445	29.17	28.9203	29.4053	29.1628	28.995	28.8858
Q9H444	Charged multivesicular body protein 4b	CHMP4B	7	7	47.3	24.95	38.695			29.5844	29.4413	29.4532	29.4727	29.5352	29.3217	29.6022	29.5481	29.509	NaN	29.3745	29.4113
Q02447	Transcription factor Sp3	SP3	1	1	3.6	81.924	15.647			NaN	NaN	NaN	NaN	NaN	NaN	NaN	27.0711	26.726	26.5653	NaN	26.9088
Q96FJ2	Dynein light chain 2, cytoplasmic	DYNLL2	6	3	64	10.35	63.841			31.0864	31.325	31.0609	31.2814	31.1604	31.2019	31.0349	30.9814	31.0737	30.9045	30.8004	30.8974
Q9Y4E8	Ubiquitin carboxyl-terminal hydrolase 15	USP15	28	26	35.7	112.42	63.728			28.8711	28.9484	28.8741	28.6697	28.7064	28.8081	28.9841	29.1937	28.9428	28.8887	28.726	29.027
Q96B70	Leukocyte receptor cluster member 9	LENG9	10	10	41.1	53.166	29.027			27.965	NaN	27.9146	28.0965	NaN	27.7708	NaN	NaN	26.7389	NaN	NaN	26.5754
Q9NV70	Exocyst complex component 1	EXOC1	12	12	24.6	101.98	16.894			27.2077	27.1214	27.5682	27.2353	27.3828	27.2445	27.2445	26.9316	27.4154	NaN	NaN	27.0505
P15170	Eukaryotic peptide chain release factor GTP-binding subunit ERF3A	GSPT1	19	12	41.7	55.755	76.153			30.7849	30.7849	30.7692	30.5844	30.5389	30.6372	31.1483	31.0283	31.0864	31.0349	30.9677	30.7692
P43490	Nicotinamide phosphoribosyltransferase	NAMPT	17	17	51.1	55.52	30.293			29.5165	28.9259	28.6697	29.3303	28.8264	28.3704	28.7227	28.8623	28.5573	28.2535	28.7096	28.6798
Q9P287	BRCA2 and CDKN1A-interacting protein	BCCIP	10	10	37.6	35.979	185.03			30.099	29.8667	29.94	30.2535	29.8385	30.0864	29.2913	29.3044	29.027	NaN	29.0427	29.0686
P57088	Transmembrane protein 33	TMEM33	7	7	27.9	27.978	28.813			28.9923	28.6492	29.0243	28.7581	28.7421	29.0137	28.8234	29.0686	29.3578	28.6764	29.0003	29.1164
P16949	Stathmin	STMN1	13	9	41.6	17.302	66.897			32.0832	32.0283	31.7373	32.3879	32.1574	31.9983	32.0381	32.0017	31.9539	31.6964	31.8719	31.9435
Q8IVF7	Formin-like protein 3	FMNL3	5	5	5.1	117.21	6.6821			NaN	NaN	NaN	NaN	NaN	NaN	26.391	26.1488	25.9043	26.2961	26.067	25.5551
P50402	Emerin	EMD	8	8	47.6	28.994	29.059			29.109	29.0583	29.203	28.6964	28.5203	29.2869	28.9031	28.6764	29.0583	28.7227	28.3869	29.0137
Q9Y266	Nuclear migration protein nudC	NUDC	14	14	45.3	38.242	32.069			31.0349	30.6713	30.4629	30.8157	30.4532	30.196	30.1724	30.0737	30.1115	30.3515	29.84	29.5898
P29692	Elongation factor 1-delta	EEF1D	17	16	64.4	31.121	323.31			33.6629	33.8042	33.8234	33.5527	33.7849	33.7047	33.6629	33.6629	33.715	33.6198	33.5179	33.4458
Q8IWA0	WD repeat-containing protein 75	WDR75	14	14	28.6	94.498	64.558			29.3088	29.196	29.1507	29.4374	28.8112	29.0243	29.1214	29.0401	29.1189	28.8974	29.099	28.8081
Q13868	Exosome complex component RRP4	EXOSC2	6	6	33.8	32.789	26.096			27.4314	26.9977	26.8264	27.2714	27.0711	27.0914	27.4394	NaN	NaN	NaN	27.2353	27.3239
Q96GW9	Methionine--tRNA ligase, mitochondrial	MARS2	5	5	13.7	66.59	10.543			NaN	NaN	NaN	NaN	NaN	NaN	NaN	26.002	25.9672	25.9157	25.8576	25.7129
O60826	Coiled-coil domain-containing protein 22	CCDC22	10	10	27	70.755	26.579			26.8741	27.2077	26.6998	27.1214	27.0914	27.2803	27.2979	27.0711	26.3811	26.8741	26.9203	26.632
Q96JJ7	Protein disulfide-isomerase TMX3	TMX3	5	5	18.1	51.871	39.263			27.5826	27.3066	27.4938	27.3828	27.6181	27.509	27.0914	27.2353	27.2714	NaN	27.1312	26.9539
Q8IVD9	NudC domain-containing protein 3	NUDCD3	8	8	34.6	40.822	63.247			27.5898	27.5826	27.4862	27.8142	27.9259	27.6527	27.8741	27.9203	28.0557	28.0453	27.8019	27.4862
P49585	Choline-phosphate cytidylyltransferase A	PCYT1A	7	7	28.3	41.731	26.614			27.8203	27.8858	28.0505	27.9088	27.4785	28.019	27.7833	27.9088	27.6931	NaN	27.5609	27.726
Q9NX40	OCIA domain-containing protein 1	OCIAD1	6	6	33.5	27.626	14.834			28.7031	29.1312	29.1361	28.6798	29.0401	28.9622	28.9705	29.2216	29.3641	28.726	29.094	29.2535
P23528	Cofilin-1	CFL1	17	13	69.3	18.502	306.96			35.2619	35.2265	35.2011	35.1262	35.2408	35.1338	35.3436	35.3763	35.3988	35.13	35.043	35.4581
Q9UNK0	Syntaxin-8	STX8	4	4	20.8	26.906	26.629			NaN	NaN	25.7234	25.8118	NaN	25.8811	26.3204	NaN	NaN	26.2535	26.2679	25.9628
O14925;Q5SRD1	Mitochondrial import inner membrane translocase subunit Tim23;Putative mitochondrial import inner membrane translocase subunit Tim23B	TIMM23;TIMM23B	4	4	26.3	21.943	12.179			28.0137	27.9146	28.1015	27.9595	28.1604	28.066	27.9814	28.2077	28.1459	28.0243	NaN	27.8974
Q6ZSR9	Uncharacterized protein FLJ45252		6	6	30.7	37.976	91.843			27.673	27.8564	27.8799	27.3324	27.6181	27.5463	27.1015	NaN	27.8682	NaN	NaN	27.3828
Q6P1J9	Parafibromin	CDC73	6	6	13.9	60.576	8.5654			26.632	26.4488	26.673	26.726	26.5711	26.8741	25.797	NaN	26.632	NaN	NaN	26.1194
P78406	mRNA export factor	RAE1	12	12	49.7	40.968	74.45			29.4032	29.2147	29.3153	29.3704	28.9622	28.9595	28.8564	28.6865	28.8974	28.2077	28.7227	28.9677
Q6VN20	Ran-binding protein 10	RANBP10	7	7	20.5	67.256	29.41			27.341	27.217	27.0505	27.141	27.4785	27.1015	27.5014	NaN	27.5682	NaN	27.391	27.3745
Q15048	Leucine-rich repeat-containing protein 14	LRRC14	4	4	11.6	54.513	40.962			25.4953	25.4041	25.2821	NaN	NaN	25.5463	NaN	NaN	25.3877	NaN	25.239	NaN
O75152	Zinc finger CCCH domain-containing protein 11A	ZC3H11A	13	13	26.4	89.13	53.438			28.2123	28.1795	28.4394	28.019	28.1214	27.9595	27.0813	27.0084	27.5165	NaN	NaN	27.0711
P46736	Lys-63-specific deubiquitinase BRCC36	BRCC3	6	6	25.9	36.072	11.297			NaN	NaN	NaN	NaN	NaN	NaN	NaN	27.509	NaN	NaN	27.2803	27.4314
O15254	Peroxisomal acyl-coenzyme A oxidase 3	ACOX3	11	11	21.9	77.628	20.696			27.1015	26.976	27.391	26.6595	27.0084	27.4394	27.8324	27.8324	27.9372	27.4073	27.9428	27.7581
Q9NRW7	Vacuolar protein sorting-associated protein 45	VPS45	12	12	26.7	65.076	36.496			27.3153	28.0762	27.6458	27.6527	27.5463	28.2891	28.267	28.1556	28.6458	28.4976	27.9539	28.17
Q9Y2G5	GDP-fucose protein O-fucosyltransferase 2	POFUT2	3	3	8.9	49.975	5.4079			26.3811	26.9316	26.4923	26.3695	27.1312	26.5359	26.6595	26.3494	26.2096	26.2696	NaN	NaN
P11142	Heat shock cognate 71 kDa protein	HSPA8	46	34	75.9	70.897	323.31			36.6787	36.7428	36.6388	36.6522	36.6388	36.5047	36.3796	36.4596	36.4973	36.4272	36.2514	36.2102
Q96CX2	BTB/POZ domain-containing protein KCTD12	KCTD12	20	20	72	35.7	229.43			32.6586	33.3828	33.3568	32.2591	33.2336	33.2619	33.0479	32.8865	32.9312	32.9505	32.7026	32.7653
P00441	Superoxide dismutase [Cu-Zn]	SOD1	6	6	63	15.936	132.18			31.1724	31.4083	31.5296	31.3515	31.4678	31.3828	30.393	30.2759	30.1483	28.6931	30.4433	30.5933
O15067	Phosphoribosylformylglycinamidine synthase	PFAS	36	36	46.2	144.73	323.31			32.2507	31.9916	32.0447	32.3115	32.0512	32.0414	32.3515	32.2924	32.2507	31.9677	32.1634	32.3115
P62861	40S ribosomal protein S30	FAU	2	2	18.6	6.6478	4.1656			30.362	NaN	NaN	30.1483	NaN	NaN	29.6458	29.7357	30.1724	29.5664	NaN	29.8711
Q14566	DNA replication licensing factor MCM6	MCM6	38	38	51.9	92.888	228.06			31.9505	32.1694	32.1901	32.1872	32.3006	32.2675	32.1604	32.1208	32.2786	31.8829	32.0705	32.1634
Q9NVE7	Pantothenate kinase 4	PANK4	10	10	19.5	85.99	27.616			NaN	NaN	26.3545	26.5359	26.3992	26.4953	26.9316	26.3444	26.3861	26.5075	NaN	26.3562
Q9UEW8	STE20/SPS1-related proline-alanine-rich protein kinase	STK39	15	10	36.9	59.473	28.241			NaN	27.3662	NaN	NaN	28.0453	27.7195	28.6146	28.3196	27.9203	27.8385	28.4113	28.1984
P45985	Dual specificity mitogen-activated protein kinase kinase 4	MAP2K4	7	7	33.3	44.287	21.684			27.1312	27.2979	27.217	27.2803	26.8858	27.2714	27.6389	28.003	27.6458	NaN	27.4629	27.7771
P52272	Heterogeneous nuclear ribonucleoprotein M	HNRNPM	33	33	60.5	77.515	192.02			33.1099	33.0911	33.0753	33.1269	33.0958	33.1887	32.7965	32.5014	32.8215	32.3463	32.648	32.6923
Q14137	Ribosome biogenesis protein BOP1	BOP1	14	14	33.2	83.629	43.766			28.6831	28.1015	28.3367	28.3109	28.0914	28.1312	27.7581	27.341	27.9539	27.8858	27.217	27.509
O94952	F-box only protein 21	FBXO21	3	3	8	72.269	7.1272			NaN	NaN	NaN	NaN	NaN	NaN	NaN	26.6865	NaN	NaN	NaN	26.5359
O43264	Centromere/kinetochore protein zw10 homolog	ZW10	16	16	32.7	88.828	62.126			28.066	28.2759	28.1842	28.2535	28.2353	28.2123	27.8564	28.1604	28.019	27.8385	27.8741	27.9031
P53621	Coatomer subunit alpha;Xenin;Proxenin	COPA	55	55	57.7	138.34	323.31			33.0167	32.995	32.9574	32.9045	33.0495	32.9135	33.2897	33.2759	33.2619	33.0832	33.1006	33.2062
Q9UHV9	Prefoldin subunit 2	PFDN2	6	6	56.5	16.648	50.493			30.2308	30.2308	30.0479	30.0864	30.1115	29.9117	29.7227	29.7309	29.8489	29.8959	29.326	29.6005
O15164	Transcription intermediary factor 1-alpha	TRIM24	5	5	7.2	116.83	29.32			25.4831	NaN	NaN	26.0443	NaN	NaN	26.3101	26.0275	25.9716	NaN	25.792	26.1253
Q9BRJ7	Protein syndesmos	NUDT16L1	4	3	21.8	23.338	4.9309			NaN	NaN	NaN	NaN	NaN	NaN	NaN	26.8385	26.2785	NaN	NaN	26.4473
O95801	Tetratricopeptide repeat protein 4	TTC4	7	7	32.8	44.678	43.516			28.0401	28.0349	28.341	27.9595	27.632	27.5536	27.3239	NaN	27.632	NaN	27.2445	27.4394
P50453	Serpin B9	SERPINB9	15	14	48.7	42.403	28.214			28.6561	28.9841	28.8623	28.5609	29.196	29.0737	28.9595	28.362	29.6233	27.509	28.0557	29.995
Q08J23	tRNA (cytosine(34)-C(5))-methyltransferase	NSUN2	35	35	66.6	86.47	199.24			31.08	31.1361	31.099	31.0217	30.9259	31.13	30.9609	30.7613	31.0673	30.7211	30.7613	30.8901
Q8ND04	Protein SMG8	SMG8	6	6	10.2	109.68	10.556			26.3049	26.6865	26.7517	26.1391	NaN	26.2625	26.0148	26.2077	26.4488	NaN	26.0955	NaN
Q13190	Syntaxin-5	STX5	4	4	18.6	39.672	13.631			26.0914	26.2262	26.0629	25.9606	26.1391	26.0711	26.3273	NaN	26.3239	NaN	25.945	26.3943
P51610	Host cell factor 1;HCF N-terminal chain 1;HCF N-terminal chain 2;HCF N-terminal chain 3;HCF N-terminal chain 4;HCF N-terminal chain 5;HCF N-terminal chain 6;HCF C-terminal chain 1;HCF C-terminal chain 2;HCF C-terminal chain 3;HCF C-terminal chain 4;HCF C-terminal chain 5;HCF C-terminal chain 6	HCFC1	31	31	24.1	208.73	173.58			30.9677	30.8534	31.0283	31.0864	31.0017	31.08	30.4234	30.4532	30.6964	29.9259	30.611	30.5389
Q16799	Reticulon-1	RTN1	8	8	15.2	83.617	20.57			27.2714	27.3153	27.0813	27.2891	27.2535	27.1604	27.3153	27.0914	27.5463	27.3578	NaN	27.019
Q12959	Disks large homolog 1	DLG1	7	7	15.7	100.45	22.637			NaN	NaN	26.0854	NaN	26.3811	NaN	NaN	26.7389	26.3745	NaN	26.3795	26.4769
Q9Y3X0	Coiled-coil domain-containing protein 9	CCDC9	5	5	14.9	59.702	36.073			26.8142	26.9869	27.0609	26.632	26.965	27.0084	26.976	27.189	26.9977	NaN	27.019	26.8142
Q6P1A2	Lysophospholipid acyltransferase 5	LPCAT3	3	3	8.8	56.034	2.6983			NaN	NaN	NaN	NaN	NaN	NaN	NaN	27.0813	NaN	NaN	NaN	26.9428
Q9BTC0	Death-inducer obliterator 1	DIDO1	17	17	16.9	243.87	37.239			27.8623	27.7581	28.1795	28.1652	28.0762	28.4473	27.9203	27.4551	27.5969	27.5014	27.7389	27.3324
P06276	Cholinesterase	BCHE	4	4	10.1	68.417	15.139			NaN	NaN	NaN	27.4073	NaN	NaN	27.726	27.6663	NaN	27.3992	27.632	27.6458
P55884	Eukaryotic translation initiation factor 3 subunit B	EIF3B	36	36	56.4	92.48	323.31			32.6902	32.6	32.6458	32.6198	32.5203	32.4605	32.5933	32.5911	32.5844	32.5732	32.3956	32.3905
P51884	Lumican	LUM	9	9	32.2	38.429	65.782			29.2422	29.8157	29.766	28.4629	29.8173	29.5259	29.1652	29.3001	29.1628	29.2803	28.9031	29.019
P19838	Nuclear factor NF-kappa-B p105 subunit;Nuclear factor NF-kappa-B p50 subunit	NFKB1	13	13	20.9	105.35	54.502			28.2308	28.2803	28.217	28.3704	28.1984	28.362	28.7988	28.7096	28.9002	28.8829	28.5426	28.5646
P42336	Phosphatidylinositol 4,5-bisphosphate 3-kinase catalytic subunit alpha isoform	PIK3CA	11	11	12.3	124.28	12.427			25.3712	25.5285	25.5638	25.3811	25.4073	24.8811	25.5105	25.3342	NaN	25.4645	25.0359	25.341
Q969U7	Proteasome assembly chaperone 2	PSMG2	4	4	15.5	29.396	4.0905			27.0609	27.1015	27.189	27.0813	26.9869	27.1115	NaN	NaN	26.2838	NaN	26.1115	26.1871
O95373	Importin-7	IPO7	30	29	35.3	119.52	168.06			31.947	31.8234	31.7088	31.7771	31.6066	31.6501	32.362	32.3802	32.3356	32.4751	32.1634	32.005
P17858	ATP-dependent 6-phosphofructokinase, liver type	PFKL	25	22	44.5	85.018	250.28			31.1177	30.9259	30.8157	31.2422	31.1544	30.94	32.2731	32.3006	31.7088	32.245	32.0479	31.5933
P53007	Tricarboxylate transport protein, mitochondrial	SLC25A1	4	4	13.8	34.012	6.6339			26.6998	26.512	26.5754	27.341	26.9203	27.1312	28.0557	27.9869	27.9031	26.8974	28.2714	28.0505
P37198	Nuclear pore glycoprotein p62	NUP62	10	10	25.1	53.254	58.548			28.249	28.1164	28.1937	28.2399	27.5609	28.1164	28.5052	28.7581	28.3992	28.5609	28.1984	28.509
Q9NY93	Probable ATP-dependent RNA helicase DDX56	DDX56	9	9	23	61.589	15.596			27.341	27.2353	27.3324	27.217	27.0609	26.9316	26.965	27.141	26.9977	26.7895	26.7517	27.141
Q92520	Protein FAM3C	FAM3C	8	8	41.4	24.68	16.19			27.6458	28.0505	27.9705	27.7958	27.9923	28.1214	27.4938	27.6458	27.5165	NaN	27.5014	27.341
Q13459	Unconventional myosin-IXb	MYO9B	17	17	12.6	243.4	37.869			27.3066	NaN	27.4073	27.2979	27.2625	27.2445	27.6998	28.2935	28.258	27.5754	27.7453	28.4512
Q9Y3C6	Peptidyl-prolyl cis-trans isomerase-like 1	PPIL1	4	4	29.5	18.237	73.644			28.459	28.3066	NaN	NaN	28.3066	28.1795	28.9622	28.8324	28.8294	NaN	28.6492	28.8355
P08579	U2 small nuclear ribonucleoprotein B	SNRPB2	8	6	37.3	25.486	10.841			28.3452	28.2216	28.1164	28.7357	28.1361	28.1795	28.3153	28.5646	28.2714	27.7958	28.5718	28.3023
Q9NP79	Vacuolar protein sorting-associated protein VTA1 homolog	VTA1	9	9	33.2	33.879	59.613			29.604	29.5555	29.7755	29.5646	29.5591	29.5014	28.8858	28.9841	28.7292	28.8234	28.5536	28.8234
Q96N67	Dedicator of cytokinesis protein 7	DOCK7	29	27	20.2	242.56	72.492			28.9732	28.9977	28.6458	28.9117	28.8682	28.7325	29.3494	29.391	29.4032	29.2262	29.258	29.267
Q99459	Cell division cycle 5-like protein	CDC5L	24	24	46.4	92.25	289.87			29.6093	29.6424	29.8916	29.8667	29.8667	29.8872	29.611	29.4433	29.6764	29.6527	29.1115	29.5315
Q10471	Polypeptide N-acetylgalactosaminyltransferase 2;Polypeptide N-acetylgalactosaminyltransferase 2 soluble form	GALNT2	13	12	29.8	64.732	26.722			29.141	29.1747	28.9456	28.8564	29.2262	29.267	29.0164	29.0788	29.2216	28.8203	29.0531	29.0453
Q13765;E9PAV3	Nascent polypeptide-associated complex subunit alpha;Nascent polypeptide-associated complex subunit alpha, muscle-specific form	NACA	5	5	32.6	23.384	118.53			31.7573	31.8645	31.7252	31.4871	31.6285	31.4532	31.5203	31.5573	31.5978	31.5481	31.4823	31.2308
Q969X6	Cirhin	CIRH1A	13	13	30.6	76.889	27.948			28.3745	28.1214	28.1747	28.5826	27.9372	27.9595	27.7389	27.9484	28.1263	27.6458	27.8324	27.9539
P22102	Trifunctional purine biosynthetic protein adenosine-3;Phosphoribosylamine--glycine ligase;Phosphoribosylformylglycinamidine cyclo-ligase;Phosphoribosylglycinamide formyltransferase	GART	30	30	46.9	107.77	237.5			31.4581	31.3142	31.1783	31.5343	31.393	31.2308	30.9746	31.0017	31.0283	30.9882	30.7771	30.8385
O60701	UDP-glucose 6-dehydrogenase	UGDH	28	28	76.3	55.023	323.31			31.7453	32.0283	32.1694	31.6285	32.2336	32.0414	32.3223	32.0705	31.9365	31.9365	32.0576	31.9712
Q12756	Kinesin-like protein KIF1A	KIF1A	13	9	12.2	191.06	114.05			26.632	26.5898	26.5165	26.5522	26.7389	26.8385	26.9869	27.0084	26.6595	26.9088	26.7645	26.604
P00533	Epidermal growth factor receptor	EGFR	17	16	21.5	134.28	38.609			28.0711	29.5555	28.4394	27.3494	29.267	28.4354	27.8019	27.1312	28.4551	NaN	26.9869	28.2714
P57772	Selenocysteine-specific elongation factor	EEFSEC	10	10	27.3	65.304	19.47			27.965	28.019	28.003	27.9316	28.17	28.1164	28.341	28.0349	28.2891	NaN	27.8203	28.3324
Q96RF0	Sorting nexin-18	SNX18	9	9	20.2	68.894	32.997			28.1361	28.2847	28.217	28.2123	28.141	28.1164	29.3131	29.2193	29.0427	29.1866	28.8916	29.1115
P11047	Laminin subunit gamma-1	LAMC1	51	50	48.4	177.6	323.31			32.4532	32.5732	32.333	32.4058	32.5978	32.2048	31.9574	31.933	31.9574	32.0737	31.8081	31.5343
Q9UHX1	Poly(U)-binding-splicing factor PUF60	PUF60	20	20	49.9	59.875	260.69			31.6458	31.5978	31.8119	31.6022	31.4967	31.5978	31.4284	31.341	31.4083	31.3088	31.2759	31.2193
Q14166	Tubulin--tyrosine ligase-like protein 12	TTLL12	17	17	45.5	74.403	108.88			30.362	30.0084	29.8974	30.6022	30.1483	29.9539	30.1842	30.2647	30.1361	30.099	30.0349	30.0737
Q9Y487	V-type proton ATPase 116 kDa subunit a isoform 2	ATP6V0A2	9	9	14.7	98.081	13.016			26.7771	26.346	26.5638	26.7517	26.7645	NaN	27.524	27.6251	27.524	27.7129	27.2979	27.2353
Q96PZ0	Pseudouridylate synthase 7 homolog	PUS7	10	10	24.4	75.035	59.516			28.1115	27.9031	27.7771	27.7958	28.066	27.7517	28.0965	27.5754	27.7453	NaN	27.7195	27.673
Q99848	Probable rRNA-processing protein EBP2	EBNA1BP2	6	6	27.1	34.852	19.93			29.3388	29.0839	29.1337	29.1556	28.9146	28.8829	28.6998	28.9344	29.2054	28.8623	28.8355	28.8081
Q6N069	N-alpha-acetyltransferase 16, NatA auxiliary subunit	NAA16	10	6	14.1	101.46	8.8241			NaN	NaN	NaN	NaN	NaN	NaN	26.4754	26.4815	25.7871	NaN	26.2785	26.0254
P12955	Xaa-Pro dipeptidase	PEPD	8	8	26.2	54.548	40.012			27.976	27.7581	27.5826	28.0914	28.003	27.8504	28.0349	28.17	27.8682	27.8799	27.9031	27.9259
Q9H9Q2	COP9 signalosome complex subunit 7b	COPS7B	9	9	42.4	29.622	107.78			28.8887	28.4113	28.203	28.9622	28.6146	28.579	29.2825	29.0557	29.3109	29.3303	28.8264	29.0864
P05067	Amyloid beta A4 protein;N-APP;Soluble APP-alpha;Soluble APP-beta;C99;Beta-amyloid protein 42;Beta-amyloid protein 40;C83;P3(42);P3(40);C80;Gamma-secretase C-terminal fragment 59;Gamma-secretase C-terminal fragment 57;Gamma-secretase C-terminal fragment 50;C31	APP	23	22	41.4	86.942	143.57			30.7692	30.4334	30.6198	31.0479	31.4384	31.099	30.0737	30.099	30.0864	30.1361	29.7739	29.9677
P42574	Caspase-3;Caspase-3 subunit p17;Caspase-3 subunit p12	CASP3	7	7	26.7	31.608	32.674			28.0137	27.604	27.8799	27.4314	27.4551	27.5536	28.1164	27.7958	27.9428	27.7581	28.0762	27.6389
Q96QK1	Vacuolar protein sorting-associated protein 35	VPS35	32	32	45.5	91.706	296.77			31.7373	31.6798	31.6501	31.9045	31.7652	31.6372	32.0381	32.1208	31.9814	32.0184	31.9539	31.7888
Q14974	Importin subunit beta-1	KPNB1	33	33	49.2	97.169	245.7			33.1285	32.9557	32.8366	32.9557	32.8309	32.8195	32.7985	32.8919	32.8176	32.6692	32.7109	32.7553
Q9Y6V7	Probable ATP-dependent RNA helicase DDX49	DDX49	6	6	20.5	54.226	31.656			NaN	NaN	26.6181	NaN	26.2643	NaN	26.3662	NaN	26.7895	26.425	26.2961	26.6595
Q14151	Scaffold attachment factor B2	SAFB2	15	6	20.4	107.47	101.57			28.019	27.9146	28.0813	28.189	28.217	27.9869	28.0609	27.9031	27.9977	NaN	27.8142	27.9146
Q9HD20	Manganese-transporting ATPase 13A1	ATP13A1	24	24	28.8	132.95	139.74			28.1065	NaN	NaN	27.5682	26.8019	26.341	30.1724	30.5389	30.2759	29.6948	30.362	30.4629
Q99426	Tubulin-folding cofactor B	TBCB	8	8	49.2	27.325	33.211			29.461	29.1435	29.158	29.4785	29.2825	28.9677	28.9705	29.0505	29.0864	28.9259	28.9896	28.8203
O60841	Eukaryotic translation initiation factor 5B	EIF5B	27	27	30.7	138.83	131.22			30.6544	30.4919	30.5203	30.4823	30.4532	30.4433	30.947	31.1361	30.9609	30.9539	30.8901	30.8309
Q86X55	Histone-arginine methyltransferase CARM1	CARM1	10	10	28.8	65.853	33.053			28.7096	28.726	28.3745	28.8858	28.4668	28.4234	28.4113	28.5165	28.066	28.2535	28.2847	28.1164
Q66K14	TBC1 domain family member 9B	TBC1D9B	8	6	7.8	140.52	15.736			25.7821	25.7695	25.5345	26.002	NaN	NaN	26.6458	26.417	26.6181	26.3629	26.3844	26.5638
Q15631	Translin	TSN	9	9	42.1	26.183	65.469			30.0084	29.6747	29.5052	29.7195	29.7723	29.7771	30.5296	30.5573	30.4032	30.4727	30.4134	30.2308
Q14789	Golgin subfamily B member 1	GOLGB1	32	32	17.1	376.01	147.92			28.3869	28.203	28.203	28.3452	28.49	28.5128	28.459	28.4354	28.1652	NaN	28.3282	28.141
Q9UBD5	Origin recognition complex subunit 3	ORC3	6	6	15	82.253	10.116			26.5609	NaN	26.329	NaN	NaN	27.1115	26.632	26.5165	26.6458	26.5478	26.3662	26.515
Q96L92	Sorting nexin-27	SNX27	13	13	35.9	61.264	32.197			27.1795	28.0505	28.1263	28.003	28.1984	28.0401	28.7708	28.9539	29.1795	28.7292	28.9344	28.9002
P28482	Mitogen-activated protein kinase 1	MAPK1	18	14	60.8	41.389	130.38			30.7849	30.8682	30.8682	30.8081	30.9539	30.8534	30.8081	30.8157	30.8829	30.7849	30.6881	30.6798
P42345	Serine/threonine-protein kinase mTOR	MTOR	16	16	12.2	288.89	22.575			26.4815	26.7129	26.5045	26.8264	26.4154	26.6865	26.7129	NaN	NaN	NaN	NaN	26.5898
Q8TED0	U3 small nucleolar RNA-associated protein 15 homolog	UTP15	11	11	23.9	58.414	20.366			27.5463	27.5389	27.217	27.8142	27.0914	27.1312	27.141	27.019	27.391	26.9088	27.2077	27.0914
Q9Y5S2	Serine/threonine-protein kinase MRCK beta	CDC42BPB	24	24	23	194.31	79.844			28.9869	29.217	29.258	28.9287	29.1507	29.1288	29.6492	29.5352	29.2803	29.2935	29.6146	29.1913
P13984	General transcription factor IIF subunit 2	GTF2F2	11	11	60.6	28.38	30.675			28.3992	28.1604	28.3578	28.5933	28.0813	28.2625	28.5536	28.4823	28.5389	NaN	28.3109	28.5014
P42695	Condensin-2 complex subunit D3	NCAPD3	9	9	9.1	168.89	22.394			27.391	27.0609	26.673	27.0914	26.6865	26.604	26.3153	26.17	26.452	NaN	26.1852	26.2133
Q96PK6	RNA-binding protein 14	RBM14	15	15	31.2	69.491	73.665			30.5664	30.6198	30.4234	30.5933	29.8916	30.362	29.5109	29.6981	29.8623	NaN	30.0479	28.8711
Q9Y6K9	NF-kappa-B essential modulator	IKBKG	6	6	17.9	48.197	59.4			28.3704	28.4512	28.249	28.0453	28.3787	28.2353	28.8264	28.9088	28.8474	29.0914	28.4862	28.5754
Q9BV86	N-terminal Xaa-Pro-Lys N-methyltransferase 1;N-terminal Xaa-Pro-Lys N-methyltransferase 1, N-terminally processed	NTMT1	5	5	25.1	25.387	119.48			27.7389	27.3324	27.6527	27.4394	27.2625	27.4551	28.0813	28.141	28.2891	28.3494	27.9259	27.8445
Q53T59	HCLS1-binding protein 3	HS1BP3	7	7	22.4	42.78	15.726			NaN	NaN	25.6865	26.4785	26.2732	26.2517	26.4473	26.3795	NaN	NaN	NaN	26.2961
Q9Y570	Protein phosphatase methylesterase 1	PPME1	17	17	52.6	42.315	196.37			29.9539	30.2647	30.4234	29.6798	30.1115	30.1361	29.6337	29.4433	29.5754	29.8785	28.579	29.5573
P16383	GC-rich sequence DNA-binding factor 2	GCFC2	8	8	14.5	89.384	64.586			27.7708	27.6798	27.611	27.9814	27.7195	27.3662	26.3324	26.8504	27.1604	NaN	27.0401	26.2571
Q9H583	HEAT repeat-containing protein 1;HEAT repeat-containing protein 1, N-terminally processed	HEATR1	35	35	21.4	242.37	105.91			29.5463	29.3044	29.0003	29.4314	28.9316	29.2285	29.3704	29.4649	29.3196	29.1795	29.3174	29.3088
O60341	Lysine-specific histone demethylase 1A	KDM1A	18	18	38.4	92.902	126.71			29.7047	29.2891	29.5736	29.5481	29.2869	29.4649	29.2077	29.2147	29.1189	28.9231	29.104	29.1556
Q16637	Survival motor neuron protein	SMN1	8	8	35.7	31.848	48.981			29.2891	29.3367	28.995	29.0296	28.9428	28.7292	28.6251	28.8142	28.8324	28.5426	28.9146	28.4234
P49368	T-complex protein 1 subunit gamma	CCT3	35	35	68.4	60.533	323.31			34.2828	34.2965	34.2336	34.2549	34.2478	34.13	33.3828	33.3568	33.3828	33.4458	33.2178	33.1037
Q5TDH0	Protein DDI1 homolog 2	DDI2	9	9	38.8	44.522	51.323			27.8081	27.7517	NaN	27.7581	27.7325	NaN	28.0453	28.0401	27.5682	27.8324	27.7708	27.7645
C9JLW8	Protein FAM195B	FAM195B	4	4	57.7	10.92	14.159			28.0762	28.2445	28.2308	27.8385	27.9977	28.1015	27.4073	NaN	NaN	27.5389	27.17	27.1312
P52306	Rap1 GTPase-GDP dissociation stimulator 1	RAP1GDS1	25	25	50.4	66.316	113.15			29.7942	29.8279	29.8294	29.8974	29.8858	29.8004	30.6372	30.6458	30.5481	30.7129	30.4629	30.2647
P50395	Rab GDP dissociation inhibitor beta	GDI2	34	24	77.3	50.663	323.31			33.9591	33.9933	33.9763	33.933	33.9677	33.9933	33.87	33.8328	33.7653	33.7946	33.6522	33.6735
P07711	Cathepsin L1;Cathepsin L1 heavy chain;Cathepsin L1 light chain	CTSL	8	8	35.4	37.564	66.929			29.2535	28.2399	28.4354	29.5352	29.0505	29.2123	31.015	31.1724	30.0737	30.7292	30.933	30.4433
Q14738	Serine/threonine-protein phosphatase 2A 56 kDa regulatory subunit delta isoform	PPP2R5D	19	13	40	69.991	67.099			28.9622	29.0164	28.965	29.0003	29.1239	28.8741	29.4032	29.4532	29.509	29.5444	29.114	29.3367
P48147	Prolyl endopeptidase	PREP	20	20	44.9	80.699	81.157			29.4727	29.7833	29.3745	29.8843	29.6005	29.4727	29.1866	29.2467	28.8711	28.8711	29.1652	28.94
Q00839	Heterogeneous nuclear ribonucleoprotein U	HNRNPU	39	39	52.1	90.583	323.31			34.78	34.5754	34.6469	34.8562	34.7553	34.8186	34.0673	33.9505	34.2478	33.7946	33.7946	34.2965
Q15428	Splicing factor 3A subunit 2	SF3A2	7	7	24.8	49.255	44.869			29.877	29.7645	29.7708	29.7517	29.6458	29.7292	29.49	29.3367	29.459	NaN	29.2054	29.4214
Q99719	Septin-5	2020-09-05	5	5	18.4	42.777	10.727			26.632	26.7771	27.1115	26.8741	27.0609	27.2625	26.7645	26.7389	26.9428	26.604	NaN	26.8019
P26599	Polypyrimidine tract-binding protein 1	PTBP1	23	20	71.2	57.221	317.03			33.6088	33.3828	33.5062	33.5179	33.3698	33.5296	33.715	33.3956	33.6088	33.1498	33.5062	33.6944
O75787	Renin receptor	ATP6AP2	2	2	10.9	39.008	37.917			27.341	27.1312	26.8504	27.141	27.0813	27.2535	27.3494	27.4073	27.3662	NaN	27.2803	27.2445
Q9NVZ3	Adaptin ear-binding coat-associated protein 2	NECAP2	4	4	30.4	28.338	59.917			27.7958	NaN	27.5898	27.8564	27.8623	27.6663	28.1015	27.4154	27.7645	27.6865	27.509	27.8203
Q9BQA1	Methylosome protein 50	WDR77	6	6	32.7	36.724	39.152			27.7064	27.3992	27.5463	27.7645	27.5898	27.1984	27.2077	27.2891	27.2625	NaN	27.3153	26.9539
P60228	Eukaryotic translation initiation factor 3 subunit E	EIF3E	21	21	55.1	52.22	190.25			31.4433	31.3879	31.2591	31.3142	31.1422	31.1422	31.325	31.2814	31.08	31.3672	31.08	30.8829
Q6FI81	Anamorsin	CIAPIN1	10	10	40.7	33.582	64.298			29.9677	29.8638	29.5071	29.8234	29.6948	29.6005	29.6163	29.7676	29.7786	29.9259	29.5184	29.3346
P22234	Multifunctional protein ADE2;Phosphoribosylaminoimidazole-succinocarboxamide synthase;Phosphoribosylaminoimidazole carboxylase	PAICS	20	20	57.6	47.079	323.31			33.0816	32.7633	32.7026	33.1649	32.7946	32.6819	33.1842	33.1916	33.1483	33.2759	32.8737	33.0134
Q6ZMI0	Protein phosphatase 1 regulatory subunit 21	PPP1R21	4	4	8.6	88.313	9.5569			NaN	26.2408	NaN	25.9134	26.527	NaN	26.4785	26.7771	26.8142	NaN	NaN	26.5898
Q9UKG1	DCC-interacting protein 13-alpha	APPL1	10	10	23.3	79.663	32.487			26.9428	26.9869	26.8019	26.9539	27.2979	27.2891	27.4314	27.2262	27.2077	NaN	27.2535	27.1015
O60831	PRA1 family protein 2	PRAF2	3	3	23	19.258	9.2194			27.019	26.9316	27.0296	27.3066	NaN	27.2353	27.6389	27.8741	27.8264	NaN	27.7389	27.611
P38606	V-type proton ATPase catalytic subunit A	ATP6V1A	23	23	54.5	68.303	102.51			29.9259	29.8519	29.9539	29.94	29.8623	29.9117	30.1604	30.1842	29.94	30.0084	30.0609	29.8974
Q9UKN8	General transcription factor 3C polypeptide 4	GTF3C4	16	16	31.4	91.981	75.38			28.3578	28.3153	28.003	28.5862	28.249	28.3324	28.3367	28.5014	28.6355	27.4629	28.6389	28.7486
Q9UID3	Vacuolar protein sorting-associated protein 51 homolog	VPS51	14	14	25.7	86.041	46.156			28.3023	28.3367	28.2979	28.3239	28.341	28.2847	28.6831	28.6964	28.611	28.6998	28.362	28.5862
P78362	SRSF protein kinase 2;SRSF protein kinase 2 N-terminal;SRSF protein kinase 2 C-terminal	SRPK2	9	7	18.6	77.526	36.438			27.5969	27.5682	27.6389	27.2535	27.4394	27.3828	27.3578	26.8974	27.3662	27.4785	26.8974	26.8858
Q08AM6	Protein VAC14 homolog	VAC14	11	11	21.6	87.972	34.135			28.1937	27.632	27.673	28.4274	27.5898	27.509	28.5128	28.4707	28.4707	28.5609	28.3992	28.1361
O95793	Double-stranded RNA-binding protein Staufen homolog 1	STAU1	12	12	31.5	63.182	82.574			29.4862	29.5184	29.3239	29.1913	29.2602	29.1115	28.5862	28.5315	28.6595	28.7162	28.3109	28.3992
O96005	Cleft lip and palate transmembrane protein 1	CLPTM1	12	12	26.8	76.096	142.53			29.9677	29.8872	30.3724	29.7692	29.9539	30.3515	29.8294	30.2193	30.099	30.1483	29.7942	29.8858
Q86VS8	Protein Hook homolog 3	HOOK3	7	7	13.5	83.125	23.109			26.9977	27.2535	26.8741	26.8504	27.0505	27.0505	26.632	26.4567	26.7895	NaN	NaN	26.524
P23258;Q9NRH3	Tubulin gamma-1 chain;Tubulin gamma-2 chain	TUBG1;TUBG2	14	14	57.4	51.169	68.608			28.9316	28.8916	28.8324	28.8711	28.8355	28.5718	29.3239	29.3088	29.2803	29.1459	29.1937	29.2557
P49207	60S ribosomal protein L34	RPL34	5	5	29.1	13.293	5.006			29.8726	29.6697	29.3971	29.4668	29.8355	29.1913	29.7895	29.8974	29.9539	30.4032	NaN	28.6492
Q7Z4Q2	HEAT repeat-containing protein 3	HEATR3	8	8	14.4	74.582	39.231			28.0813	28.141	27.9088	27.9428	27.9484	27.965	27.509	27.2891	27.4154	27.2891	27.4785	27.1115
Q9UKV5	E3 ubiquitin-protein ligase AMFR	AMFR	5	5	17.1	72.995	20.713			26.1527	25.9825	26.417	25.9157	25.6622	25.8409	NaN	26.2408	NaN	NaN	26.141	26.1293
P50851	Lipopolysaccharide-responsive and beige-like anchor protein	LRBA	26	26	13.2	319.1	154.27			27.726	27.7645	27.6458	27.8264	27.611	27.7958	29.0914	29.3001	28.5389	29.158	28.9088	28.5969
P60468	Protein transport protein Sec61 subunit beta	SEC61B	3	3	37.5	9.9743	6.6051			28.7739	28.6458	28.9622	28.2216	NaN	28.8173	28.8112	NaN	28.7833	NaN	NaN	28.6931
Q00610	Clathrin heavy chain 1	CLTC	88	88	61.1	191.61	323.31			35.5179	35.547	35.402	35.4702	35.4913	35.3169	35.3203	35.3796	35.2862	35.2478	35.2514	35.1753
Q8WVV9	Heterogeneous nuclear ribonucleoprotein L-like	HNRNPLL	15	14	46.7	60.082	97.109			29.1866	29.1214	29.6005	29.4194	29.2625	29.7453	29.1483	28.6285	28.8653	27.3828	29.114	29.2535
Q7L775	EPM2A-interacting protein 1	EPM2AIP1	15	15	32.1	70.369	28.397			27.5969	27.9146	28.5128	27.217	28.1065	28.0243	28.2353	27.9705	28.1065	28.217	27.8799	27.8858
P24941	Cyclin-dependent kinase 2	CDK2	12	10	55.7	33.929	21.879			29.3599	29.3088	29.4093	29.1676	29.2512	29.0505	29.537	29.5128	29.5969	NaN	29.362	29.524
P36507	Dual specificity mitogen-activated protein kinase kinase 2	MAP2K2	14	9	48.8	44.424	39.184			29.5844	29.7195	29.4134	29.2602	29.4254	29.326	29.3174	29.104	29.1842	29.0401	29.1795	29.0762
Q9BUL8	Programmed cell death protein 10	PDCD10	5	5	34.9	24.701	25.983			28.0137	NaN	NaN	NaN	NaN	NaN	28.0084	28.1459	28.0349	28.0137	27.9484	27.9146
P27707	Deoxycytidine kinase	DCK	9	9	48.1	30.518	284.89			28.9512	28.8234	28.9117	28.8019	28.9002	NaN	28.7031	28.9567	28.8142	28.8445	28.6285	28.6931
Q10469	Alpha-1,6-mannosyl-glycoprotein 2-beta-N-acetylglucosaminyltransferase	MGAT2	5	5	17.2	51.55	14.684			27.3239	27.4073	27.2625	27.391	27.4314	27.4073	26.7389	NaN	26.6181	NaN	NaN	26.574
Q9UI26	Importin-11	IPO11	8	8	12.3	112.53	15.477			26.4877	26.673	NaN	26.9539	NaN	26.4923	26.4583	26.632	26.3066	NaN	26.2891	26.4488
Q92734	Protein TFG	TFG	10	10	38.8	43.447	268.77			29.5969	29.7676	29.6198	29.2422	29.651	29.5664	29.459	29.5627	29.5772	29.6285	29.3683	29.2736
P47755	F-actin-capping protein subunit alpha-2	CAPZA2	14	12	72	32.949	295.92			31.4629	31.5109	31.5062	31.4284	31.5844	31.4919	32.2019	32.1634	31.8974	32.099	31.933	31.933
P19447	TFIIH basal transcription factor complex helicase XPB subunit	ERCC3	9	9	20.3	89.277	14.554			NaN	25.8717	25.7208	NaN	NaN	25.5869	26.2856	26.1661	NaN	NaN	26.3324	25.8834
Q9HCE1	Putative helicase MOV-10	MOV10	23	23	32.7	113.67	49.129			28.4512	28.4938	28.3828	28.1214	28.6527	28.3992	28.805	28.8019	28.7129	28.3153	28.7227	28.9117
P36578	60S ribosomal protein L4	RPL4	27	27	48.7	47.697	323.31			33.933	33.715	33.8422	33.7751	33.7653	33.6735	33.5412	33.4334	33.7653	33.4209	33.3828	33.6307
Q15274	Nicotinate-nucleotide pyrophosphorylase [carboxylating]	QPRT	9	9	55.6	30.845	34.848			30.3088	29.7849	29.8173	30.5664	30.1361	29.995	30.4134	30.1842	29.6268	30.1361	29.8081	30.0737
Q9BZF1	Oxysterol-binding protein-related protein 8	OSBPL8	10	10	17	101.19	44.293			27.4862	27.17	27.1795	27.4073	27.1795	27.2535	28.2759	28.5646	28.4551	28.49	28.0965	28.391
P98179	RNA-binding protein 3	RBM3	6	6	56.7	17.17	30.179			31.4727	31.8157	32.2135	30.9746	31.4083	32.0609	29.6527	29.94	30.1239	NaN	29.1214	30.2869
Q14204	Cytoplasmic dynein 1 heavy chain 1	DYNC1H1	209	209	54.9	532.4	323.31			34.6088	34.6629	34.5412	34.4883	34.5584	34.6629	35.1029	35.1604	34.9197	35.0592	34.9677	34.8608
Q9NQT4	Exosome complex component RRP46	EXOSC5	5	5	40.4	25.249	30.501			NaN	NaN	27.9977	28.1312	NaN	27.976	NaN	NaN	27.8799	NaN	NaN	27.7833
Q08AF3	Schlafen family member 5	SLFN5	7	7	9.7	101.05	8.342			NaN	NaN	NaN	NaN	NaN	NaN	26.3959	26.7389	NaN	NaN	26.4754	NaN
Q96K37	Solute carrier family 35 member E1	SLC35E1	5	5	21	44.772	22.942			26.673	26.8264	26.4815	26.3562	26.4738	26.726	26.5345	NaN	27.0813	NaN	26.5285	26.9203
P55327	Tumor protein D52	TPD52	8	8	53.6	24.327	68.408			29.1312	28.8504	29.0375	29.1214	29.1724	29.0137	28.6764	28.6964	28.9705	29.109	28.906	27.6865
Q9UL15	BAG family molecular chaperone regulator 5	BAG5	10	10	35.8	51.199	31.734			27.7895	28.0349	28.1115	27.9539	28.0557	28.0296	27.4314	27.5389	27.3745	27.3066	27.2979	27.4473
Q6IBS0	Twinfilin-2	TWF2	9	8	40.1	39.548	45.49			28.2216	28.2979	28.3787	28.019	28.4746	28.3109	28.003	28.0864	28.1065	27.9428	27.8682	28.0864
Q16186	Proteasomal ubiquitin receptor ADRM1	ADRM1	7	7	17.4	42.153	40.909			29.5826	29.9259	29.9677	29.0686	29.6372	29.6233	28.7802	28.7676	28.5165	28.6389	28.6764	28.459
P33993	DNA replication licensing factor MCM7	MCM7	36	36	54.2	81.307	201.24			32.6437	32.6198	32.6819	32.7231	32.6629	32.7985	32.6329	32.5458	32.8478	32.5933	32.3854	32.7474
Q96I24	Far upstream element-binding protein 3	FUBP3	21	20	58.9	61.64	122.44			30.4433	30.5573	30.5203	30.4823	30.4727	30.5933	30.5573	30.5109	30.7453	30.5664	30.4823	30.4823
P41250	Glycine--tRNA ligase	GARS	22	22	42.8	83.165	186.3			31.3356	31.3879	31.4532	31.2924	31.3515	31.3982	31.196	31.1664	30.947	31.2365	31.015	30.7373
P07900	Heat shock protein HSP 90-alpha	HSP90AA1	57	39	65.8	84.659	323.31			37.192	37.2811	37.097	37.2102	37.2193	36.9634	36.7047	36.6116	36.7047	36.7553	36.5091	36.435
P82675	28S ribosomal protein S5, mitochondrial	MRPS5	6	6	15.8	48.006	9.2815			NaN	NaN	NaN	NaN	NaN	NaN	27.0401	NaN	27.4234	NaN	27.141	NaN
P51809	Vesicle-associated membrane protein 7	VAMP7	10	10	54.5	24.935	29.724			27.9031	27.8682	27.5898	27.8445	27.8203	27.6527	27.9146	28.4154	28.0296	27.7895	28.0453	28.2445
P83436	Conserved oligomeric Golgi complex subunit 7	COG7	10	10	24.8	86.343	16.748			NaN	NaN	NaN	NaN	NaN	NaN	27.524	27.2625	27.3662	NaN	27.4785	27.0711
P40227	T-complex protein 1 subunit zeta	CCT6A	27	22	71	58.024	229.32			33.6307	33.7252	33.5412	33.6307	33.715	33.4458	32.7907	32.686	32.846	32.8309	32.5911	32.6
Q69YN2	CWF19-like protein 1	CWF19L1	20	20	45.5	60.618	124.16			29.5844	29.5463	29.8974	29.6337	29.6697	29.995	28.877	28.6251	29.1483	28.0965	28.9567	29.1507
Q9Y5L0	Transportin-3	TNPO3	16	16	26.9	104.2	158.59			29.3848	29.1795	28.9677	29.4032	28.9287	29.2399	29.5463	29.7341	29.8711	29.5444	29.6998	29.632
P17174	Aspartate aminotransferase, cytoplasmic	GOT1	21	21	65.4	46.247	160.51			31.4581	31.1664	31.2535	31.4532	31.2924	31.2979	31.6154	31.2924	31.2365	31.362	31.2703	31.2479
Q13257	Mitotic spindle assembly checkpoint protein MAD2A	MAD2L1	3	3	17.1	23.51	5.7299			27.8081	NaN	NaN	NaN	NaN	27.7064	NaN	27.8445	27.5969	27.7195	27.5389	NaN
P49770	Translation initiation factor eIF-2B subunit beta	EIF2B2	9	9	32.2	38.989	24.655			28.6216	28.5203	28.6458	28.4354	28.4032	28.3828	28.7486	28.6075	28.7064	28.6355	28.6898	28.4433
Q8NFQ8	Torsin-1A-interacting protein 2	TOR1AIP2	10	10	38.5	51.263	79.107			28.0084	28.1604	28.019	27.9977	28.0557	27.8623	28.3109	28.4314	28.4314	28.2308	28.2445	28.4154
Q15181	Inorganic pyrophosphatase	PPA1	19	19	76.8	32.66	315.21			33.4083	33.1161	33.1331	33.3033	33.1664	33.1115	32.8883	32.881	32.8737	32.8829	32.7771	32.6944
Q9NXV6	CDKN2A-interacting protein	CDKN2AIP	9	9	25.7	61.124	97.553			27.2535	27.0711	27.141	27.1214	27.2353	27.1795	27.6798	27.5969	27.5463	NaN	NaN	27.5165
Q93008	Probable ubiquitin carboxyl-terminal hydrolase FAF-X	USP9X	40	22	20.5	292.28	125.91			28.9512	29.1115	28.8623	28.9732	29.0505	28.9231	29.588	29.7227	29.4473	29.6216	29.4512	29.4093
Q9H8Y8	Golgi reassembly-stacking protein 2	GORASP2	9	9	35	47.145	70.188			28.217	28.6458	28.8081	28.6389	NaN	28.9002	29.6981	29.5109	29.4862	29.1556	29.4919	29.7211
Q9UHY7	Enolase-phosphatase E1	ENOPH1	6	6	33.3	28.932	30.38			28.9869	28.9117	28.7739	29.3367	28.7895	28.6964	29.2979	29.5463	29.3536	29.0243	29.5951	29.2557
Q9Y3C1	Nucleolar protein 16	NOP16	6	6	31.5	21.188	44.124			26.9539	26.5255	26.673	26.604	26.4441	26.189	26.7129	26.673	26.604	NaN	26.7129	26.4186
Q09028	Histone-binding protein RBBP4	RBBP4	18	13	77.4	47.655	190.71			33.5296	33.2336	33.3033	33.4943	33.2759	33.3169	33.4702	33.4581	33.6088	33.4943	33.2164	33.5296
Q969N2	GPI transamidase component PIG-T	PIGT	8	8	16.4	65.699	10.305			26.6998	26.1075	NaN	26.6865	26.8385	26.7389	NaN	26.604	26.4089	NaN	26.4661	26.3629
Q9Y3C8	Ubiquitin-fold modifier-conjugating enzyme 1	UFC1	7	7	29.9	19.458	9.9871			29.6814	28.6146	29.0084	29.2803	28.7325	29.0839	29.5259	28.8623	28.8415	29.019	29.2376	28.7645
P53990	IST1 homolog	IST1	6	6	20.6	39.75	54.641			27.7771	NaN	NaN	27.7453	27.2445	NaN	28.0813	28.2891	28.0349	27.9539	28.203	27.976
Q9H5N1	Rab GTPase-binding effector protein 2	RABEP2	12	12	31.5	63.542	26.551			NaN	27.2891	27.2714	27.1604	27.1507	27.1214	27.7645	27.4394	27.7645	27.611	27.6663	27.4154
P40189	Interleukin-6 receptor subunit beta	IL6ST	6	6	12.9	103.54	17.388			NaN	NaN	26.6865	NaN	26.9316	NaN	27.0401	27.1795	26.9977	27.4154	26.8385	26.5551
Q00688	Peptidyl-prolyl cis-trans isomerase FKBP3	FKBP3	8	8	44.6	25.177	130.23			31.0673	30.6713	30.6285	31.1604	30.8385	30.9882	31.1724	31.1604	31.1544	30.8901	31.1052	31.2019
Q96S44	TP53-regulating kinase	TP53RK	5	5	27.3	28.16	30.019			27.3662	27.2714	27.4314	27.391	27.4785	27.5389	26.8858	26.9428	27.2353	26.9428	26.4073	27.3239
Q99541	Perilipin-2	PLIN2	7	7	29.1	48.075	38.27			NaN	NaN	NaN	NaN	NaN	NaN	27.5826	28.524	28.0296	NaN	28.1065	27.8974
P30419	Glycylpeptide N-tetradecanoyltransferase 1	NMT1	13	9	35.5	56.806	40.469			29.5278	29.5444	29.6646	29.5463	29.4012	29.5203	29.104	29.2399	29.2193	28.8623	29.258	29.1459
P61966	AP-1 complex subunit sigma-1A	AP1S1	3	2	19.6	18.733	151.7			27.1604	26.6865	26.6458	27.1507	NaN	26.6181	27.6181	27.7833	27.6595	NaN	27.4862	27.6998
Q02790	Peptidyl-prolyl cis-trans isomerase FKBP4;Peptidyl-prolyl cis-trans isomerase FKBP4, N-terminally processed	FKBP4	23	23	61.2	51.804	207.02			32.525	32.5366	32.245	32.5664	32.2193	32.0544	32.3169	32.375	32.362	32.3672	32.2647	32.1513
A0AVT1	Ubiquitin-like modifier-activating enzyme 6	UBA6	25	25	36.2	117.97	80.885			28.9344	28.8682	28.7486	29.1263	28.7129	28.726	29.7064	29.7146	29.8081	29.7096	29.6389	29.6163
Q9UHD8	Septin-9	2020-09-09	25	25	58.2	65.401	226.07			32.225	32.4159	32.4967	32.2106	32.4581	32.5062	32.1872	32.1021	32.2731	32.3088	31.8534	32.1052
Q16539	Mitogen-activated protein kinase 14	MAPK14	9	9	41.4	41.293	24.159			27.8741	27.6389	27.8264	27.6251	27.7895	27.5754	28.003	28.0084	28.1115	27.9977	27.9031	27.965
Q9BUF5	Tubulin beta-6 chain	TUBB6	24	11	76.7	49.857	152			31.4234	31.6586	31.6066	31.2422	31.5844	31.5889	30.4919	30.0609	30.611	30.0609	30.2869	30.5664
Q8TC07	TBC1 domain family member 15	TBC1D15	5	5	9.8	79.49	27.368			27.0505	27.0505	27.0296	27.3153	27.1984	27.4473	27.4707	27.4234	27.3992	NaN	NaN	27.341
Q92979	Ribosomal RNA small subunit methyltransferase NEP1	EMG1	6	6	34.8	26.72	14.13			28.4707	28.1556	28.4274	28.5463	28.0965	28.4823	27.6998	28.0137	28.1556	27.7453	27.9088	27.9869
O15439	Multidrug resistance-associated protein 4	ABCC4	42	41	39.3	149.52	323.31			27.7958	27.7389	27.217	27.5682	27.5682	26.8385	31.3828	31.393	31.1361	31.0479	31.341	31.2647
Q15738	Sterol-4-alpha-carboxylate 3-dehydrogenase, decarboxylating	NSDHL	11	11	48.5	41.9	110.3			29.0453	28.509	28.6898	29.4413	28.8264	28.7517	28.9428	29.1507	28.9203	28.9841	29.0003	28.7676
Q13425	Beta-2-syntrophin	SNTB2	8	8	20.4	57.949	11.476			26.6595	26.673	26.7389	26.7517	26.6998	26.6181	26.8623	26.726	26.4984	26.6458	26.8974	26.2262
Q9UKK9	ADP-sugar pyrophosphatase	NUDT5	13	13	56.2	24.327	79.661			29.6915	29.6831	29.5555	29.9117	29.579	29.4688	30.0479	30.0737	29.788	30.0737	29.8549	29.7162
P11216	Glycogen phosphorylase, brain form	PYGB	27	26	42.8	96.695	243.95			30.6798	30.6544	30.5573	30.5109	30.6798	30.6713	31.1724	31.1783	31.0414	31.1052	31.015	31.0217
O75694	Nuclear pore complex protein Nup155	NUP155	26	26	30	155.2	297.37			30.5203	30.4433	30.2535	30.393	30.2979	30.2535	30.3196	30.3724	30.5933	30.2647	30.2422	30.5203
Q96M27	Protein PRRC1	PRRC1	5	5	15.1	46.701	8.9987			27.1214	27.0609	27.0711	27.0296	27.5463	27.17	27.2535	27.2262	NaN	27.2714	27.0296	NaN
Q5JTH9	RRP12-like protein	RRP12	12	12	14	143.7	45.94			28.5203	28.1604	28.3452	28.3704	28.019	28.3239	28.8112	28.9146	28.8324	28.8445	28.5426	28.8974
Q5T1M5	FK506-binding protein 15	FKBP15	17	17	23.5	133.63	175.66			27.9031	28.17	28.2123	27.9539	28.17	28.2803	29.0531	29.1288	29.0505	29.2123	28.9622	28.7739
Q9BXP2	Solute carrier family 12 member 9	SLC12A9	5	5	10.8	96.109	7.5356			NaN	NaN	NaN	25.8576	NaN	NaN	26.604	26.8385	NaN	NaN	26.5389	26.7389
Q9BRA2	Thioredoxin domain-containing protein 17	TXNDC17	4	4	38.2	13.941	10.816			30.5203	30.4629	30.6198	30.6629	30.6964	30.5844	30.7613	30.94	30.5573	30.393	30.8829	30.7129
O43681	ATPase ASNA1	ASNA1	11	11	53.4	38.792	116.55			29.9677	30.0217	29.8534	30.2077	30.2077	30.0609	30.196	30.1115	29.995	29.995	29.9677	30.099
O75348	V-type proton ATPase subunit G 1	ATP6V1G1	6	6	64.4	13.757	45.328			28.1604	28.2123	28.3023	28.1937	28.1507	28.0453	28.3066	28.3662	28.141	NaN	28.1361	28.249
Q5JS54	Proteasome assembly chaperone 4	PSMG4	2	2	33.3	13.775	16.196			NaN	NaN	NaN	NaN	NaN	NaN	26.6458	NaN	26.4202	NaN	26.5507	26.3578
Q9UL25	Ras-related protein Rab-21	RAB21	7	7	34.7	24.347	131.11			29.1507	29.2376	29.0401	28.8623	29.0296	28.7517	29.0375	29.3641	29.2262	29.2376	29.0686	29.0864
Q9Y678	Coatomer subunit gamma-1	COPG1	33	29	59.7	97.717	323.31			31.2814	31.3463	31.3828	31.1664	31.3776	31.3088	31.5435	31.5296	31.5799	31.611	31.4823	31.2924
P62847	40S ribosomal protein S24	RPS24	6	6	36.1	15.423	23.137			31.2193	31.1783	31.1239	31.1724	31.3463	31.1724	30.7292	30.6458	31.1544	30.393	30.7613	31.0927
Q9Y3E5	Peptidyl-tRNA hydrolase 2, mitochondrial	PTRH2	8	8	54.7	19.193	323.31			29.7818	29.3494	29.7211	29.7629	29.7146	29.708	29.2077	29.3951	29.2007	28.8741	29.3346	29.3131
P46060	Ran GTPase-activating protein 1	RANGAP1	20	20	44.6	63.541	72.445			30.2077	30.341	30.4727	29.8858	30.1239	29.995	29.7739	29.6285	29.8974	29.6424	29.6407	29.7786
P61006	Ras-related protein Rab-8A	RAB8A	8	5	39.1	23.668	33.073			28.8324	28.976	28.8142	28.8385	28.6181	28.7129	28.805	28.9231	29.099	28.8887	28.7421	28.9567
Q7KZF4	Staphylococcal nuclease domain-containing protein 1	SND1	48	48	65.3	102	323.31			33.6522	33.7849	33.8328	33.7353	33.7849	33.7946	33.9063	33.9677	33.9677	33.9063	33.7849	33.9063
Q9GZZ1	N-alpha-acetyltransferase 50	NAA50	11	11	58	19.398	27.587			29.5444	29.2512	29.5969	29.4314	29.2331	29.2759	28.9977	28.965	28.6005	28.906	28.7453	28.6931
Q9H307	Pinin	PNN	7	7	13.9	81.627	34.158			29.4433	29.4012	29.5203	29.4314	29.2445	29.3388	29.0686	28.7833	29.249	29.267	28.8799	28.6898
O43747	AP-1 complex subunit gamma-1	AP1G1	20	20	34.5	91.35	151.87			29.5898	29.2781	29.1866	29.6005	29.3473	29.2467	29.8004	29.9539	29.8004	29.9677	29.7146	29.6251
P13473	Lysosome-associated membrane glycoprotein 2	LAMP2	4	4	13.2	44.96	6.9965			28.6285	28.3536	27.5609	28.1263	27.976	27.7389	27.3494	27.8019	27.673	27.0505	27.5898	27.8623
Q16850	Lanosterol 14-alpha demethylase	CYP51A1	12	12	30.8	56.805	54.714			28.1459	27.524	27.341	29.1483	28.8173	28.5165	27.0296	27.6998	NaN	NaN	27.3239	NaN
P20338	Ras-related protein Rab-4A	RAB4A	8	8	42.2	24.389	16.726			28.203	28.1214	28.1115	28.0505	28.1507	28.0349	27.5536	27.6663	27.7517	27.7195	27.5315	27.4707
Q96DB5	Regulator of microtubule dynamics protein 1	RMDN1	9	9	34.7	35.808	31.175			26.9539	27.1604	27.6181	27.391	27.5463	27.8445	28.2216	28.1115	28.0965	27.17	28.2123	28.5052
Q9BRT3	Migration and invasion enhancer 1	MIEN1	2	2	40	12.403	19.946			NaN	NaN	NaN	25.0772	NaN	NaN	25.0975	25.6125	25.391	25.3844	NaN	25.2207
Q9NZL9	Methionine adenosyltransferase 2 subunit beta	MAT2B	11	11	46.4	37.551	27.483			28.8355	28.5426	28.3536	28.8974	28.6181	28.4032	28.8019	28.9484	28.7486	28.4938	28.8142	28.9316
O43684	Mitotic checkpoint protein BUB3	BUB3	11	11	44.5	37.154	37.663			30.6285	30.3724	30.3196	30.8081	30.5014	30.3303	30.4032	30.2422	30.4134	30.196	30.2535	30.3724
P98175	RNA-binding protein 10	RBM10	13	12	25.6	103.53	129.74			28.249	28.189	28.2123	28.4785	28.189	28.1164	28.1604	28.2979	28.1604	NaN	27.9869	28.258
Q7Z3J2	UPF0505 protein C16orf62	C16orf62	11	11	19.1	109.56	18.713			26.7645	26.6998	NaN	26.9203	26.604	26.8385	26.7389	NaN	26.8385	NaN	26.632	26.7895
P33176	Kinesin-1 heavy chain	KIF5B	40	32	52.9	109.68	323.31			31.901	31.995	32.08	31.9295	32.1115	31.9983	32.0316	32.1146	31.978	32.1177	31.9295	31.8347
Q86U42	Polyadenylate-binding protein 2	PABPN1	7	7	46.1	32.749	51.331			28.8945	28.8112	29.0583	28.9287	28.8593	29.0427	28.8945	29.1312	29.203	29.0322	28.9372	29.0479
P11717	Cation-independent mannose-6-phosphate receptor	IGF2R	78	78	45.2	274.37	323.31			33.8328	33.9417	33.7252	33.8234	34.0349	33.7751	33.4458	33.5062	33.5754	33.4334	33.3698	33.4943
P50454	Serpin H1	SERPINH1	31	31	68.4	46.44	323.31			36.7175	36.6388	36.5978	36.6522	36.6918	36.6388	36.0389	35.6415	36.2084	35.821	35.7677	36.1049
Q8N1F7	Nuclear pore complex protein Nup93	NUP93	28	28	46.6	93.487	122.23			30.947	30.7771	30.6881	30.7771	30.6022	30.6881	30.7292	30.7373	30.8755	30.7927	30.6629	30.6629
Q92616	Translational activator GCN1	GCN1L1	85	85	43.5	292.75	323.31			30.933	30.9609	30.7533	30.94	30.7047	30.7927	31.6415	31.6923	31.6415	31.5978	31.6285	31.5203
O15126	Secretory carrier-associated membrane protein 1	SCAMP1	6	6	34.3	37.92	69.776			29.0453	29.1556	29.2285	29.0914	29.2935	29.393	29.2262	29.2216	29.2979	29.393	29.1263	28.9705
Q68EM7	Rho GTPase-activating protein 17	ARHGAP17	9	9	21.7	95.436	28.515			27.3992	27.6663	27.6595	27.141	27.7453	NaN	NaN	27.2979	27.4473	27.391	NaN	27.1984
O00233	26S proteasome non-ATPase regulatory subunit 9	PSMD9	5	5	26.5	24.682	11.217			28.3109	28.3578	28.3452	28.1263	NaN	28.2262	27.9539	28.3494	28.0557	28.0813	28.0296	NaN
Q9H3K6	BolA-like protein 2	BOLA2	4	4	61.6	10.116	70.757			30.393	30.1483	29.8755	30.2535	30.1239	30.0217	29.9117	29.8741	29.9814	30.0349	29.9539	29.4957
P23526	Adenosylhomocysteinase	AHCY	25	25	53.7	47.716	174.93			33.6307	33.4702	33.4943	33.5754	33.4209	33.4458	33.5412	33.3698	33.4209	33.3303	33.4458	33.3169
Q12768	WASH complex subunit strumpellin	KIAA0196	21	21	22.2	134.28	39.954			28.5463	28.3153	28.2935	28.3282	28.3324	28.632	28.8415	28.9287	28.9146	28.7802	28.9031	28.7802
Q9BU89	Deoxyhypusine hydroxylase	DOHH	6	6	41.7	32.904	31.049			27.7064	27.7129	27.7771	27.3828	27.391	27.5609	27.7195	27.6663	27.5609	27.7389	27.7129	27.2262
Q99613;B5ME19	Eukaryotic translation initiation factor 3 subunit C;Eukaryotic translation initiation factor 3 subunit C-like protein	EIF3C;EIF3CL	28	28	39	105.34	308.32			31.9677	31.978	31.9505	31.9435	31.8271	31.7888	31.7771	31.8042	31.7333	31.8792	31.6458	31.5573
Q14160	Protein scribble homolog	SCRIB	16	14	18	174.88	53.894			27.3066	27.3828	26.7771	26.9203	27.1604	27.2625	27.4785	27.2891	27.632	27.217	27.726	27.2077
Q15185	Prostaglandin E synthase 3	PTGES3	8	8	50	18.697	286.75			32.2478	32.3276	32.3436	32.2365	32.3594	32.3646	32.196	32.3061	32.0512	32.2393	32.1052	31.9916
Q13057	Bifunctional coenzyme A synthase;Phosphopantetheine adenylyltransferase;Dephospho-CoA kinase	COASY	4	4	9	62.328	5.3788			NaN	NaN	NaN	24.9316	24.632	NaN	NaN	25.3975	NaN	25.3273	NaN	NaN
P42166	Lamina-associated polypeptide 2, isoform alpha;Thymopoietin;Thymopentin	TMPO	29	20	62.4	75.491	323.31			32.3463	32.2591	32.5435	32.3515	32.4334	32.6798	32.4259	32.362	32.4799	32.4184	32.1544	32.4654
P0DMV9;P0DMV8	Heat shock 70 kDa protein 1B;Heat shock 70 kDa protein 1A	HSPA1B;HSPA1A	33	20	62.9	70.051	323.31			34.2336	34.2265	33.7751	34.3101	34.0673	33.5412	34.2619	34.2689	34.2549	34.3169	34.2408	33.9933
P11908	Ribose-phosphate pyrophosphokinase 2	PRPS2	12	4	47.8	34.769	150.3			30.4032	29.8901	30.0737	30.3088	29.9539	30.0737	30.4823	30.3196	30.362	30.393	30.2077	30.3515
P40855	Peroxisomal biogenesis factor 19	PEX19	8	8	37.8	32.806	272.15			27.8081	27.8916	27.6458	27.4314	27.7517	27.341	27.3745	27.5969	27.5969	NaN	27.5165	27.391
Q9HAU5	Regulator of nonsense transcripts 2	UPF2	8	8	9.1	147.81	17.975			NaN	25.7568	25.6068	25.4676	25.5345	25.9361	26.1055	25.8528	25.4923	NaN	25.945	25.5667
Q9H2G2	STE20-like serine/threonine-protein kinase	SLK	25	24	35.4	142.69	171.08			29.0965	29.3828	29.1984	29.217	29.2869	29.4394	29.1239	29.2535	29.1483	29.4134	28.8355	29.0057
Q86X76	Nitrilase homolog 1	NIT1	8	8	40.1	35.896	21.884			27.2714	26.6458	27.1984	27.2979	27.0084	27.3745	26.6458	NaN	NaN	NaN	26.6181	26.518
Q99805	Transmembrane 9 superfamily member 2	TM9SF2	12	12	24.7	75.775	57.008			30.1361	30.2193	30.2647	30.1483	30.2535	30.3303	30.611	30.6285	30.8004	30.6198	30.3828	30.8081
Q8NI27	THO complex subunit 2	THOC2	21	21	18.8	182.77	109.14			28.7292	28.579	28.611	28.8324	28.6831	28.7802	28.267	28.3494	28.3536	NaN	28.2445	28.267
O94903	Proline synthase co-transcribed bacterial homolog protein	PROSC	5	5	22.2	30.344	4.7047			27.3745	NaN	NaN	27.6527	NaN	NaN	27.5315	27.4473	27.4234	NaN	27.391	27.4073
O60925	Prefoldin subunit 1	PFDN1	4	4	31.1	14.21	46.609			28.7325	28.6216	28.7096	28.8564	28.49	28.5862	28.0965	28.2308	27.9146	28.1842	27.9923	27.8623
Q92922	SWI/SNF complex subunit SMARCC1	SMARCC1	17	10	21.6	122.87	83.405			29.0375	29.0164	28.7129	28.8682	28.5609	28.8234	26.6998	NaN	NaN	NaN	26.6458	26.6181
Q13206	Probable ATP-dependent RNA helicase DDX10	DDX10	5	5	7.9	100.89	6.8513			25.6486	25.5285	NaN	25.5812	25.341	25.4362	25.4892	NaN	NaN	NaN	NaN	25.4234
Q8NC56	LEM domain-containing protein 2	LEMD2	7	7	24.3	56.974	42.799			27.3324	NaN	NaN	27.141	NaN	27.2803	27.3153	27.391	27.8741	27.611	27.2803	27.5463
P28074	Proteasome subunit beta type-5	PSMB5	13	13	56.7	28.48	124.35			31.08	31.1422	31.3033	31.1783	31.1239	31.225	30.8157	30.8682	30.7292	30.4234	30.7292	31.015
Q92623	Tetratricopeptide repeat protein 9A	TTC9	3	3	24.8	24.379	13.04			27.1984	27.3324	27.3239	27.2714	27.0914	27.141	27.4785	26.8858	27.4707	NaN	NaN	27.2353
Q9HAB8	Phosphopantothenate--cysteine ligase	PPCS	4	4	10.9	34.005	3.3639			26.9203	26.976	27.3153	26.9088	27.189	27.2353	27.524	27.5315	27.3066	27.2077	27.4785	27.4862
P23381	Tryptophan--tRNA ligase, cytoplasmic;T1-TrpRS;T2-TrpRS	WARS	20	20	54.1	53.165	196.98			31.6964	31.933	32.2869	31.5709	31.8719	32.0864	31.393	31.3033	31.3568	31.5062	31.0017	31.3088
O75844	CAAX prenyl protease 1 homolog	ZMPSTE24	9	9	23.8	54.812	21.666			28.6831	28.5128	28.8264	NaN	29.1015	28.7958	29.7421	29.6964	29.6764	29.1819	29.94	29.7047
P11586	C-1-tetrahydrofolate synthase, cytoplasmic;Methylenetetrahydrofolate dehydrogenase;Methenyltetrahydrofolate cyclohydrolase;Formyltetrahydrofolate synthetase;C-1-tetrahydrofolate synthase, cytoplasmic, N-terminally processed	MTHFD1	30	30	42.7	101.56	92.4			31.4581	31.2422	30.9746	31.5203	31.2869	31.0283	31.0673	31.0927	30.9677	31.1115	30.846	30.9746
Q96GC9	Vacuole membrane protein 1	VMP1	2	2	9.1	46.237	27.777			29.0003	NaN	28.995	28.7453	28.8534	NaN	NaN	28.7453	28.6355	28.6697	NaN	28.5862
Q9BV57	1,2-dihydroxy-3-keto-5-methylthiopentene dioxygenase	ADI1	5	5	41.3	21.498	39.397			28.3787	27.8916	28.1747	28.1795	27.611	28.0296	27.8324	27.8264	27.5315	NaN	27.5898	27.7581
P19784	Casein kinase II subunit alpha	CSNK2A2	9	9	31.4	41.213	41.994			28.5352	28.2979	28.17	28.3951	28.3494	28.1984	28.3578	28.5898	28.6663	NaN	28.4668	28.4938
P50583	Bis(5-nucleosyl)-tetraphosphatase [asymmetrical]	NUDT2	3	3	36.1	16.829	16.464			NaN	26.4999	27.0505	27.4154	26.9869	27.0914	27.4629	27.3066	26.965	NaN	NaN	27.1984
Q9NZ01	Very-long-chain enoyl-CoA reductase	TECR	6	6	15.6	36.034	8.2369			27.1507	NaN	NaN	27.2625	NaN	26.7129	27.1984	27.5826	27.4551	27.7389	27.189	27.0505
Q9H6T3	RNA polymerase II-associated protein 3	RPAP3	13	13	23	75.718	29.879			28.4433	28.341	28.4629	28.4707	28.4433	28.2625	28.2847	28.391	28.3153	28.4394	28.1652	28.189
Q9NZD2	Glycolipid transfer protein	GLTP	4	4	23.9	23.85	9.6815			27.632	NaN	NaN	NaN	NaN	NaN	28.2399	NaN	NaN	NaN	28.4668	27.8264
Q9H0C8	Integrin-linked kinase-associated serine/threonine phosphatase 2C	ILKAP	5	5	14.8	42.906	8.724			27.8264	27.6527	27.7833	27.8799	27.7195	27.8799	27.611	NaN	27.726	NaN	NaN	27.604
Q7L5N1	COP9 signalosome complex subunit 6	COPS6	12	12	54.1	36.163	58.074			30.7373	30.7373	30.846	30.7771	30.6544	30.7927	30.8608	30.8974	30.9117	30.7129	30.8157	30.9539
Q9H4A3	Serine/threonine-protein kinase WNK1	WNK1	5	5	2.9	250.79	17.414			26.2481	26.0793	26.1253	26.2243	26.2021	26.1776	26.2445	26.1035	26.0296	26.1776	25.8552	26.1546
O60271	C-Jun-amino-terminal kinase-interacting protein 4	SPAG9	23	21	28.2	146.2	73.771			29.0164	29.4823	29.3683	28.9896	29.4032	29.5296	28.5609	28.6424	28.3828	28.5426	28.3367	28.5315
O76024	Wolframin	WFS1	8	8	13.4	100.29	19.018			27.2262	26.9869	27.3239	27.0914	NaN	27.4938	NaN	27.2979	27.4394	NaN	27.217	27.3992
Q12907	Vesicular integral-membrane protein VIP36	LMAN2	13	13	47.8	40.228	179.71			31.0349	31.1664	31.1115	31.0283	31.3463	31.1544	31.2535	31.393	31.1901	30.4134	31.5754	31.4284
Q92890	Ubiquitin fusion degradation protein 1 homolog	UFD1L	9	9	39.7	34.5	27.352			28.9705	28.7864	29.019	28.5014	28.8504	29.099	28.3536	28.141	28.604	28.4354	NaN	28.1937
Q8IYM9	E3 ubiquitin-protein ligase TRIM22	TRIM22	8	8	24.9	56.947	34.955			NaN	NaN	NaN	NaN	NaN	NaN	27.6458	27.726	27.3324	27.4938	27.4629	27.604
Q9UHY1	Nuclear receptor-binding protein	NRBP1	12	12	33.5	59.844	125.99			29.6285	29.9259	29.8974	29.6216	29.7517	29.7486	29.5826	29.7629	29.5862	29.8504	29.4113	29.4629
Q13526	Peptidyl-prolyl cis-trans isomerase NIMA-interacting 1	PIN1	7	7	63.8	18.243	164.66			28.4073	28.5573	28.7227	28.5203	27.8385	28.8264	30.2193	30.0737	30.1724	30.1724	30.1115	30.0084
O00429	Dynamin-1-like protein	DNM1L	31	31	59.9	81.876	323.31			31.1901	31.0609	31.1664	31.1664	31.0544	31.1361	31.4483	31.393	31.3982	31.4581	31.3088	31.2924
P31150	Rab GDP dissociation inhibitor alpha	GDI1	31	21	73.6	50.582	296.9			31.933	32.1177	32.005	31.8755	32.2478	31.9295	32.4184	32.4108	32.1842	32.2336	32.4134	32.1989
Q9P289	Serine/threonine-protein kinase 26	STK26	10	6	34.1	46.528	18.522			27.8385	27.7453	27.6181	27.6595	27.7325	27.6595	27.1604	27.4394	26.8858	NaN	NaN	27.1214
P54578	Ubiquitin carboxyl-terminal hydrolase 14	USP14	27	27	64.2	56.068	323.31			31.196	31.2979	31.2814	31.2703	31.2979	31.2703	31.0349	30.933	31.015	30.8974	30.9259	30.9882
P63010	AP-2 complex subunit beta	AP2B1	39	24	44.2	104.55	271.83			31.5799	31.4775	31.3142	31.525	31.4284	31.393	31.933	31.9814	31.9365	31.947	31.9574	31.7731
O00273	DNA fragmentation factor subunit alpha	DFFA	7	7	26.6	36.521	12.904			28.8916	28.6527	28.2935	29.2077	28.2445	28.0084	27.6389	27.341	27.8623	27.4314	27.604	27.6663
P10599	Thioredoxin	TXN	8	8	86.7	11.737	15.084			31.4775	31.611	31.5754	31.6285	31.5754	31.4581	32.0641	31.8719	31.7533	31.8571	31.7613	31.9188
Q5VIR6	Vacuolar protein sorting-associated protein 53 homolog	VPS53	9	9	19.6	79.652	14.127			27.1507	27.1214	27.3066	27.0711	27.2979	27.1984	27.6931	27.6458	27.604	NaN	27.611	27.5826
Q8N4V1	Membrane magnesium transporter 1	MMGT1	1	1	18.3	14.686	56.023			27.8858	27.3578	27.8741	NaN	NaN	27.9595	NaN	27.9539	NaN	NaN	27.7771	28.0137
Q96A65	Exocyst complex component 4	EXOC4	19	19	26.7	110.5	34.163			28.1556	28.4976	28.1065	28.1747	28.258	28.6005	27.9977	27.9088	28.1115	28.003	27.9705	27.8799
O94925	Glutaminase kidney isoform, mitochondrial	GLS	19	19	39	73.46	149.09			29.651	30.2647	30.5933	29.6233	30.393	30.6458	29.8901	30.2193	30.4334	28.965	30.3088	30.6713
Q8N1B4	Vacuolar protein sorting-associated protein 52 homolog	VPS52	10	10	19.9	82.22	30.483			26.6865	26.8142	26.726	26.9316	26.8974	26.726	27.2803	27.217	26.9316	27.0711	27.1214	27.1015
Q13144	Translation initiation factor eIF-2B subunit epsilon	EIF2B5	15	15	30.5	80.379	99.112			29.2847	29.4727	29.3724	29.4194	29.4073	29.3766	29.6595	29.6561	29.6915	29.6781	29.6163	29.5463
Q6XQN6	Nicotinate phosphoribosyltransferase	NAPRT	11	11	38.8	57.578	73.338			27.8385	NaN	27.7708	28.0243	28.0914	28.0965	27.9316	27.4394	27.524	NaN	27.1312	27.9428
Q9Y5B8	Nucleoside diphosphate kinase 7	NME7	7	7	27.4	42.491	13.169			26.6458	NaN	26.3204	26.3153	NaN	26.3342	26.6998	26.4441	26.4831	NaN	26.4923	NaN
Q02108	Guanylate cyclase soluble subunit alpha-3	GUCY1A3	20	20	44.2	77.452	71.472			29.0557	29.2007	29.3578	29.3131	29.4668	29.846	30.3088	30.3088	30.1483	30.3196	30.3196	29.9117
O94855	Protein transport protein Sec24D	SEC24D	15	14	23.2	113.01	50.818			28.2847	28.4473	28.4394	28.1065	28.4234	28.3536	29.1795	29.3494	29.1065	29.1459	29.1189	29.2193
Q13330	Metastasis-associated protein MTA1	MTA1	11	9	21.4	80.785	58.169			28.203	28.4314	28.49	28.3536	28.4234	28.6424	27.8264	27.9539	NaN	NaN	27.4394	28.1507
Q12972	Nuclear inhibitor of protein phosphatase 1;Activator of RNA decay	PPP1R8	8	8	49.9	38.478	67.999			28.1507	28.4512	28.3066	28.3023	28.217	28.3023	28.141	27.8564	28.066	NaN	27.7129	28.1984
P62241	40S ribosomal protein S8	RPS8	13	13	58.7	24.205	195.77			33.1346	33.0414	33.1783	33.0657	33.0753	33.0512	32.6713	32.9591	33.0365	32.4209	32.9848	33.0495
Q96P70	Importin-9	IPO9	25	25	36.5	115.96	246.46			31.6756	31.4384	31.3356	31.7211	31.4629	31.5109	32.4919	32.5156	32.3854	32.6022	32.4209	32.1872
P47897	Glutamine--tRNA ligase	QARS	30	30	47.7	87.798	122.33			31.1604	31.0349	31.1115	31.0864	31.0609	31.1544	31.0217	30.8755	30.8385	31.0544	30.7613	30.7533
Q9UKV8	Protein argonaute-2	AGO2	24	19	43.1	97.207	107.28			29.4746	29.6544	29.5591	29.5052	29.3023	29.4649	29.7195	29.7708	29.9117	29.632	29.7802	29.837
Q92900	Regulator of nonsense transcripts 1	UPF1	45	45	51.6	124.34	323.31			31.6671	31.6501	31.6154	31.3672	31.4083	31.325	31.3196	31.3196	31.4184	31.4871	31.2077	31.1901
O00471	Exocyst complex component 5	EXOC5	11	11	23.4	81.852	45.442			28.1065	28.3951	28.3494	28.1652	28.3951	28.4194	27.1507	27.6998	27.8385	27.7645	27.6527	27.1312
Q8NBF2	NHL repeat-containing protein 2	NHLRC2	16	16	34	79.443	169.78			29.5444	29.6407	29.6022	29.7276	29.5951	29.8081	29.8741	30.0349	29.6233	29.8474	29.8355	29.7211
O00231	26S proteasome non-ATPase regulatory subunit 11	PSMD11	28	28	66.1	47.463	75.771			31.8829	31.6839	31.5978	31.8081	31.7047	31.6415	32.0283	32.1177	32.0283	32.1483	31.9539	31.9045
P60510	Serine/threonine-protein phosphatase 4 catalytic subunit	PPP4C	11	9	46.3	35.08	32.93			28.6629	28.8916	28.8234	28.726	28.7771	28.7486	28.3536	28.7096	28.3066	28.4113	28.391	28.4473
Q8N122	Regulatory-associated protein of mTOR	RPTOR	7	7	8.7	149.04	19.78			25.965	NaN	26.1546	NaN	26.1927	26.3943	25.9869	25.9672	NaN	NaN	NaN	25.9248
Q6UW63	KDEL motif-containing protein 1	KDELC1	9	9	24.7	58.042	14.242			27.5165	27.2625	27.019	27.5536	27.524	26.6595	27.509	27.6527	27.5389	27.524	27.6181	27.3992
Q99873	Protein arginine N-methyltransferase 1	PRMT1	13	13	39.1	42.461	86.579			30.9188	30.8234	30.8901	30.7453	30.8534	30.9539	30.947	30.9882	30.8974	30.6964	30.9746	30.995
Q9BW91	ADP-ribose pyrophosphatase, mitochondrial	NUDT9	11	11	38.9	39.125	21.847			27.7645	27.8081	27.524	27.6251	27.6798	27.5165	28.3992	28.4551	28.4862	NaN	28.4976	28.2891
Q9NRV9	Heme-binding protein 1	HEBP1	5	5	43.9	21.097	13.525			27.1015	27.2803	27.5014	26.9539	27.1214	26.9977	27.391	27.4629	27.17	NaN	27.2625	27.3324
Q12904	Aminoacyl tRNA synthase complex-interacting multifunctional protein 1;Endothelial monocyte-activating polypeptide 2	AIMP1	14	14	63.5	34.352	118.03			31.0927	31.0479	30.8901	31.196	31.0084	30.8901	30.8534	30.9117	30.947	30.947	30.8829	30.7211
Q6PGP7	Tetratricopeptide repeat protein 37	TTC37	18	18	16.9	175.48	24.239			26.632	27.0609	NaN	NaN	26.8504	27.1795	26.7517	26.8142	NaN	26.7895	NaN	26.6865
Q15477	Helicase SKI2W	SKIV2L	14	14	18.5	137.75	23.489			27.3324	27.524	27.4234	27.341	27.4314	27.189	27.3745	27.1507	27.3662	NaN	27.3992	27.0914
Q9Y2G3	Probable phospholipid-transporting ATPase IF	ATP11B	17	16	23.9	134.19	305.09			28.7129	29.8519	29.7178	28.5536	29.7064	29.8294	28.6998	28.7676	28.9428	28.6865	28.7927	28.7927
P29590	Protein PML	PML	17	17	30.8	97.55	69.076			29.708	30.1724	30.0349	29.7178	30.1724	29.9117	28.4512	28.3992	28.4032	27.2353	28.8974	28.5165
P06733	Alpha-enolase	ENO1	25	22	73	47.168	301.49			35.5325	35.2157	35.0872	35.4763	35.3033	35.1753	35.0673	35.13	34.933	34.9417	35.0951	34.9548
O00487	26S proteasome non-ATPase regulatory subunit 14	PSMD14	9	9	44.2	34.577	55.227			30.4134	30.099	30.3196	30.2422	30.1604	30.2869	30.6629	30.4727	30.362	30.4433	30.4823	30.4334
Q9UQ80	Proliferation-associated protein 2G4	PA2G4	26	26	77.2	43.786	323.31			33.2193	33.0398	33.0512	33.2619	32.9729	32.8627	33.2759	33.2478	33.2478	33.3169	33.2004	33.0974
Q13435	Splicing factor 3B subunit 2	SF3B2	31	31	42.1	100.23	323.31			31.5889	31.5481	31.4678	31.6242	31.5573	31.4532	31.5527	31.4775	31.6881	31.5389	31.4919	31.5527
O00468	Agrin;Agrin N-terminal 110 kDa subunit;Agrin C-terminal 110 kDa subunit;Agrin C-terminal 90 kDa fragment;Agrin C-terminal 22 kDa fragment	AGRN	17	17	15.7	217.32	40.821			26.5433	26.1623	26.3861	26.8741	26.2996	25.9977	27.7708	27.5969	26.9088	27.4154	27.5165	27.3324
P63244	Guanine nucleotide-binding protein subunit beta-2-like 1;Guanine nucleotide-binding protein subunit beta-2-like 1, N-terminally processed	GNB2L1	21	21	87.4	35.076	323.31			34.0349	33.715	33.9242	33.9063	33.6735	33.8608	33.6839	33.3698	33.4943	33.2619	33.4581	33.6735
Q8TCJ2	Dolichyl-diphosphooligosaccharide--protein glycosyltransferase subunit STT3B	STT3B	10	10	14.3	93.673	17.785			28.8534	28.1015	28.4433	28.6629	28.4512	28.726	28.9259	29.2512	28.9031	29.0111	28.9002	29.0531
P07195	L-lactate dehydrogenase B chain	LDHB	24	23	63.8	36.638	323.31			35.1604	34.9933	34.9975	35.2897	35.1338	34.9505	35.5032	35.5325	35.3203	35.4519	35.5296	35.2265
Q96CW1	AP-2 complex subunit mu	AP2M1	11	11	30.6	49.654	34.688			30.0349	30.0864	30.0349	30.0737	30.0479	29.8755	30.2308	30.1239	30.3196	30.0737	30.1483	30.3196
O95167	NADH dehydrogenase [ubiquinone] 1 alpha subcomplex subunit 3	NDUFA3	1	1	41.7	9.2787	8.3649			NaN	NaN	28.17	28.066	28.003	28.1842	NaN	NaN	28.17	NaN	28.1065	28.1361
P20674	Cytochrome c oxidase subunit 5A, mitochondrial	COX5A	8	8	58	16.762	22.246			31.0609	31.015	30.8901	31.1604	31.0017	30.94	30.8974	30.7211	30.6629	30.5754	30.7047	30.8608
Q15813	Tubulin-specific chaperone E	TBCE	22	22	57.7	59.345	151.55			30.8309	30.611	30.6458	30.8755	30.7692	30.6964	29.6389	29.3992	29.4073	29.4862	29.4254	29.4093
P63313	Thymosin beta-10	TMSB10	3	3	63.6	5.0256	48.462			33.2019	33.1146	32.5226	33.1783	33.3169	32.5889	32.3169	32.4083	32.7047	32.7692	32.3515	32.13
P08253	72 kDa type IV collagenase;PEX	MMP2	3	3	8	73.881	9.2001			NaN	NaN	NaN	NaN	NaN	NaN	26.2926	26.2679	26.3712	NaN	25.9716	26.5105
Q16881	Thioredoxin reductase 1, cytoplasmic	TXNRD1	16	16	37.9	70.905	201.62			30.7373	30.995	30.8974	30.6964	31.0017	30.8901	31.0609	30.9882	31.225	30.8974	30.995	31.2365
Q9H074	Polyadenylate-binding protein-interacting protein 1	PAIP1	12	12	35.5	53.524	37.477			30.4823	30.5481	30.6198	30.5203	30.5844	30.5389	30.4727	30.7453	30.5754	30.7047	30.5481	30.4032
O60493	Sorting nexin-3	SNX3	11	9	71	18.762	59.725			29.8858	30.1361	30.0084	29.6964	29.9259	29.9539	27.6389	28.3452	28.2625	NaN	28.0349	28.1015
P60983	Glia maturation factor beta	GMFB	5	3	60.6	16.713	57.599			29.1263	29.2285	29.4294	29.1115	29.094	29.5352	27.6527	27.6527	28.0557	NaN	27.3324	28.0864
P61024	Cyclin-dependent kinases regulatory subunit 1	CKS1B	3	3	65.8	9.6601	19.964			26.9203	NaN	NaN	NaN	NaN	NaN	25.902	NaN	NaN	NaN	NaN	25.8599
P21127;Q9UQ88	Cyclin-dependent kinase 11B;Cyclin-dependent kinase 11A	CDK11B;CDK11A	9	9	12.5	92.619	9.8155			27.2445	26.8019	26.9869	27.4473	27.2714	27.4938	26.9203	26.7389	27.2077	NaN	26.9869	26.8504
Q92769	Histone deacetylase 2	HDAC2	13	9	37.7	55.364	146.71			30.6629	30.5573	30.5389	30.7047	30.5933	30.6285	29.7849	29.7325	29.8726	29.8534	29.6355	29.7676
Q96S06	Lipase maturation factor 1	LMF1	3	3	8.6	64.873	6.2037			NaN	NaN	NaN	NaN	NaN	NaN	26.4394	26.2151	26.2353	NaN	26.2571	NaN
Q96K17	Transcription factor BTF3 homolog 4	BTF3L4	6	6	55.7	17.27	67.372			30.6022	30.4727	30.393	30.6458	30.3515	30.341	31.0673	31.0414	31.0479	30.9539	31.0479	31.0217
Q6DD88	Atlastin-3	ATL3	16	16	48.4	60.541	252.41			31.1483	31.1604	31.2422	31.0737	31.0737	31.2308	30.947	31.1783	31.0864	31.325	30.933	30.7771
O00203	AP-3 complex subunit beta-1	AP3B1	28	28	32.9	121.32	102.39			30.1483	30.1115	30.0349	30.099	29.9814	30.0349	30.3724	30.4629	30.393	30.5844	30.2193	30.2759
Q15404	Ras suppressor protein 1	RSU1	5	5	22.7	31.54	9.0033			27.7325	28.1065	28.3992	27.4234	28.0296	28.2935	27.6251	27.7325	27.726	27.3494	27.6931	27.8682
Q96GD0	Pyridoxal phosphate phosphatase	PDXP	6	6	27.4	31.698	10.248			26.4138	NaN	26.3494	26.604	26.2909	26.48	26.5448	26.3222	NaN	NaN	26.4041	26.3877
Q8IWT0	Protein archease	ZBTB8OS	3	3	22.8	19.491	45.882			NaN	NaN	NaN	26.2353	NaN	NaN	26.8858	26.2553	26.8385	26.7517	26.632	26.5507
P63167	Dynein light chain 1, cytoplasmic	DYNLL1	4	1	50.6	10.366	323.31			29.3088	29.4823	29.3431	29.4214	29.459	29.0737	29.726	29.6337	29.805	29.6848	29.7833	29.57
P62888	60S ribosomal protein L30	RPL30	6	6	51.3	12.784	91.066			32.6586	32.5085	32.6329	32.3879	32.4483	32.4532	32.665	32.2731	32.4184	32.225	32.4159	32.5956
P04179	Superoxide dismutase [Mn], mitochondrial	SOD2	6	6	40.1	24.75	30.049			29.6561	29.6881	29.6697	29.6181	29.8519	29.7942	28.5933	28.7988	28.611	27.8916	29.114	NaN
O15381	Nuclear valosin-containing protein-like	NVL	11	11	18.8	95.05	32.508			27.7389	27.6663	27.673	27.8081	27.5536	27.4234	27.1214	26.9203	27.1984	27.1312	26.9869	27.0084
P10155	60 kDa SS-A/Ro ribonucleoprotein	TROVE2	13	13	29.2	60.67	28.062			28.6865	28.4274	28.17	28.9484	28.6964	28.4274	29.2331	29.1866	29.4512	29.1604	29.3536	29.2422
Q9H5Q4	Dimethyladenosine transferase 2, mitochondrial	TFB2M	5	5	16.2	45.348	7.8364			26.8858	26.5565	26.6181	26.7645	26.5433	26.5478	26.0914	26.3844	26.5448	NaN	25.918	26.6181
O60684	Importin subunit alpha-7	KPNA6	18	8	37.1	60.029	293.74			30.5109	30.3088	30.3088	30.3828	30.2869	30.2869	30.7533	30.6544	30.7771	30.8309	30.6798	30.5389
Q9H4A4	Aminopeptidase B	RNPEP	26	26	56.2	72.595	320.18			31.6329	31.4823	31.3356	31.846	31.6022	31.4967	32.2077	32.196	31.9505	31.846	32.2786	32.0927
O75352	Mannose-P-dolichol utilization defect 1 protein	MPDU1	4	4	21.1	26.638	7.4497			27.1214	26.53	27.6798	26.8623	26.7645	27.6458	27.1015	27.3324	27.4938	27.1507	27.1015	27.5389
Q15286	Ras-related protein Rab-35	RAB35	4	4	27.4	23.025	9.3248			27.8324	27.7389	27.4073	27.8203	27.7833	27.5969	28.3239	28.4551	28.4194	NaN	28.1747	28.524
P34932	Heat shock 70 kDa protein 4	HSPA4	47	45	68.3	94.33	323.31			34.0911	33.8328	33.7353	34.0349	33.87	33.6735	33.6198	33.6088	33.5754	33.7553	33.5179	33.3828
Q9UK41	Vacuolar protein sorting-associated protein 28 homolog	VPS28	8	8	54.8	25.425	78.978			28.0243	28.1214	27.7895	28.1312	28.0864	28.003	28.3153	28.217	28.2399	28.267	28.2891	28.0965
Q9UNM6	26S proteasome non-ATPase regulatory subunit 13	PSMD13	22	22	59	42.945	244.94			31.2647	31.1664	31.1901	31.1842	31.1664	31.1422	31.4775	31.5799	31.4433	31.5709	31.5203	31.2869
O15173	Membrane-associated progesterone receptor component 2	PGRMC2	9	8	39.9	23.818	37.06			28.7739	28.7927	28.8142	29.3724	28.9677	29.0111	29.6663	30.0349	29.6285	NaN	29.3473	30.0609
Q9BVK6	Transmembrane emp24 domain-containing protein 9	TMED9	7	6	29.8	27.277	113.31			30.1842	30.2979	30.2422	30.1604	30.3724	30.341	30.4334	30.4334	30.1239	30.1604	30.4234	30.2869
O95400	CD2 antigen cytoplasmic tail-binding protein 2	CD2BP2	8	8	37.5	37.646	32.835			28.3282	28.4234	28.2979	28.391	28.6285	28.6181	27.5165	27.1015	27.8799	NaN	27.1115	27.7958
P61086	Ubiquitin-conjugating enzyme E2 K	UBE2K	12	12	74	22.406	46.589			30.0864	30.1361	30.362	30.0609	30.2193	30.3515	30.2759	30.1483	30.1842	30.2077	30.1239	30.1604
O75592	E3 ubiquitin-protein ligase MYCBP2	MYCBP2	11	11	3.5	513.63	33.813			NaN	25.4041	NaN	25.4923	25.6264	NaN	25.9271	NaN	26.0401	NaN	25.3975	26.3427
Q92945	Far upstream element-binding protein 2	KHSRP	28	26	55.3	73.114	323.31			32.9259	32.846	32.8497	32.9365	32.8865	32.9259	32.6285	32.6985	32.6307	32.555	32.5799	32.7088
Q5SWX8	Protein odr-4 homolog	ODR4	6	6	19.4	51.103	21.858			27.2625	27.0813	27.2353	27.3066	27.1795	27.3578	27.4707	27.632	27.341	NaN	27.632	27.2353
P41252	Isoleucine--tRNA ligase, cytoplasmic	IARS	53	53	50.4	144.5	298.31			31.8829	31.7453	31.5618	31.8608	31.6629	31.6923	32.7672	32.8042	32.7211	32.7888	32.7829	32.6022
Q9UHD2	Serine/threonine-protein kinase TBK1	TBK1	7	7	17.7	83.641	45.144			26.9316	27.019	26.7645	NaN	26.533	26.5898	27.1015	27.2262	27.217	27.4473	27.141	26.7771
Q8TED1	Probable glutathione peroxidase 8	GPX8	6	6	40.7	23.881	11.026			28.2891	28.524	28.4668	28.0813	28.3023	28.5052	28.6075	28.9231	29.3217	28.6181	28.9174	29.2308
Q86YQ8	Copine-8	CPNE8	9	8	25.2	63.107	44.056			27.4394	27.17	26.8264	27.3828	27.4629	26.7645	28.1459	28.0914	27.7389	28.3704	27.9316	27.4551
P49591	Serine--tRNA ligase, cytoplasmic	SARS	22	22	48.4	58.777	211.12			31.8571	32.1084	32.0705	31.8937	32.0414	32.0017	31.7573	31.8157	31.7731	31.8119	31.7129	31.7088
P31939	Bifunctional purine biosynthesis protein PURH;Phosphoribosylaminoimidazolecarboxamide formyltransferase;IMP cyclohydrolase	ATIC	34	34	75.5	64.615	254.62			31.8719	31.6839	31.717	31.9045	31.7211	31.8157	32.5226	32.4108	32.4134	32.5343	32.3356	32.3672
Q01085	Nucleolysin TIAR	TIAL1	9	6	35.2	41.59	64.337			28.4354	28.509	28.49	28.3704	28.2445	28.3536	28.5278	28.5969	28.5754	28.4551	28.6251	28.5128
Q8IW45	ATP-dependent (S)-NAD(P)H-hydrate dehydratase	CARKD	5	5	23.6	36.576	14.967			NaN	NaN	NaN	NaN	NaN	NaN	27.0711	27.1507	NaN	26.9203	27.3745	26.8741
Q13409	Cytoplasmic dynein 1 intermediate chain 2	DYNC1I2	19	19	49.5	71.456	283.06			30.5933	30.7613	30.6881	30.8829	30.8234	30.6713	31.362	31.1842	31.0349	31.2535	31.2365	30.995
P29218	Inositol monophosphatase 1	IMPA1	11	11	44.8	30.188	120.23			29.8608	29.9259	30.0479	29.8309	30.0217	30.0349	30.196	30.2535	29.9814	30.1604	30.2077	29.94
P41223	Protein BUD31 homolog	BUD31	9	9	53.5	17	51.88			29.4649	29.3324	29.4274	29.2979	29.1115	29.2285	29.2077	29.2007	29.3174	29.2957	29.2007	29.1239
Q00169	Phosphatidylinositol transfer protein alpha isoform	PITPNA	9	8	47.4	31.806	31.349			27.2353	27.2535	27.726	27.3153	26.9316	27.2445	26.7895	26.8623	26.8019	26.8741	27.141	26.1642
P63162;P14678	Small nuclear ribonucleoprotein-associated protein N;Small nuclear ribonucleoprotein-associated proteins B and B	SNRPN;SNRPB	8	8	24.6	24.614	40.175			31.1604	31.0544	31.1422	31.2647	31.13	31.2479	30.8682	30.6881	30.8755	30.5573	30.7849	30.9609
P09651;Q32P51	Heterogeneous nuclear ribonucleoprotein A1;Heterogeneous nuclear ribonucleoprotein A1, N-terminally processed;Heterogeneous nuclear ribonucleoprotein A1-like 2	HNRNPA1;HNRNPA1L2	24	24	65.1	38.746	323.31			34.5412	34.4823	34.6143	34.6361	34.547	34.6522	34.2336	34.2048	34.2759	34.3436	34.0673	34.1901
Q9BV19	Uncharacterized protein C1orf50	C1orf50	6	6	54.8	21.876	25.229			26.506	26.8974	NaN	NaN	26.8974	26.7895	27.632	27.2714	27.2535	NaN	27.189	27.5165
Q5H9R7	Serine/threonine-protein phosphatase 6 regulatory subunit 3	PPP6R3	18	18	32.6	97.668	253.75			29.4881	29.6163	29.4919	29.4746	29.4194	29.5352	29.6492	29.805	29.5933	29.995	29.588	29.2759
O75063	Glycosaminoglycan xylosylkinase	FAM20B	3	3	13.4	46.432	9.0187			26.4923	NaN	NaN	26.6181	26.1946	25.9157	NaN	26.8264	26.6458	26.7771	26.604	26.7389
Q93100	Phosphorylase b kinase regulatory subunit beta	PHKB	6	6	8.8	124.88	9.0603			NaN	NaN	26.4266	26.9316	26.7129	26.6181	27.524	27.3828	27.217	27.7129	27.3153	26.8974
Q6P3W7	SCY1-like protein 2	SCYL2	7	7	11.7	103.71	20.123			27.1604	27.5315	27.4707	27.3239	26.9977	27.1214	27.7195	27.6389	27.8324	27.9539	27.7195	27.3578
Q9Y696	Chloride intracellular channel protein 4	CLIC4	20	19	83.4	28.772	251.06			32.8328	33.0117	32.8271	32.7494	32.8865	32.8195	33.3169	33.2048	33.2897	33.099	33.2178	33.3698
O43719	HIV Tat-specific factor 1	HTATSF1	14	14	32.2	85.852	323.31			29.2847	29.2445	29.2512	29.267	29.2007	29.3971	28.94	28.7549	28.8623	28.1015	29.0084	29.1435
Q96J01	THO complex subunit 3	THOC3	10	10	48.4	38.771	30.588			29.0914	29.0003	28.7645	28.9344	28.9231	28.8945	28.4032	28.1459	28.249	28.17	28.3282	28.203
O75391	Sperm-associated antigen 7	SPAG7	7	7	36.6	26.034	210.12			27.7325	27.5826	27.8445	27.7771	27.5536	27.6663	27.5609	27.6527	27.6251	27.5315	27.632	27.5754
P06744	Glucose-6-phosphate isomerase	GPI	22	17	53.9	63.146	191.8			33.1634	33.2619	33.1589	33.2336	33.3033	33.2897	33.1269	33.1269	32.9117	32.9063	33.1604	32.9966
P08754	Guanine nucleotide-binding protein G(k) subunit alpha	GNAI3	17	10	58.2	40.532	155.05			29.7031	30.0864	29.6848	29.5682	29.8623	29.6595	29.2376	29.3109	29.3745	29.019	29.4492	29.3239
Q9UI10	Translation initiation factor eIF-2B subunit delta	EIF2B4	13	13	40.7	57.557	196.44			29.3066	29.2535	29.2847	29.3239	29.4134	29.2262	29.5627	29.4707	29.4668	29.5184	29.4093	29.4746
P07814	Bifunctional glutamate/proline--tRNA ligase;Glutamate--tRNA ligase;Proline--tRNA ligase	EPRS	68	68	57.8	170.59	323.31			34.0184	33.9677	33.8974	34.0911	34.0017	33.8422	33.9063	33.8138	33.7653	34.0017	33.7653	33.6088
Q9BWD1	Acetyl-CoA acetyltransferase, cytosolic	ACAT2	11	11	57.4	41.35	181.3			32.0217	31.5889	31.8608	32.333	32.0349	31.8792	30.8385	30.8234	30.611	31.0084	30.6198	30.5109
P49643	DNA primase large subunit	PRIM2	7	7	17.9	58.805	10.661			26.9977	26.7771	27.019	26.9316	26.8741	27.1115	25.9781	26.275	26.527	NaN	26.2979	26.189
O00625	Pirin	PIR	8	8	39	32.113	36.95			29.3515	29.3704	29.3683	29.4938	29.6781	29.6931	28.8945	28.8945	28.8081	NaN	28.9002	28.7676
Q92599	Septin-8	2020-09-08	11	9	30.2	55.756	32.605			28.6527	28.8623	28.7771	28.611	28.9787	28.6998	28.7833	28.5352	28.4938	28.4113	28.6492	28.6595
O00116	Alkyldihydroxyacetonephosphate synthase, peroxisomal	AGPS	10	10	26.4	72.911	22.689			28.2979	28.3494	28.6492	28.2077	28.391	28.5052	27.9428	28.1065	28.0813	27.965	28.0864	27.9869
P62995	Transformer-2 protein homolog beta	TRA2B	7	7	28.1	33.665	106.95			30.2869	30.2869	30.2308	30.5296	30.5109	30.4234	30.3515	30.4134	30.3196	29.8234	30.2979	30.7292
Q9BSJ8	Extended synaptotagmin-1	ESYT1	31	31	44.1	122.85	323.31			31.7771	31.7573	31.8829	31.5573	31.6756	31.781	31.7252	31.9117	32.025	31.9259	31.8385	31.8196
Q8IZP0	Abl interactor 1	ABI1	9	6	23	55.08	15.438			26.5075	26.3943	NaN	26.4394	26.673	26.6998	26.7129	26.7895	NaN	NaN	NaN	26.726
Q96C01	Protein FAM136A	FAM136A	7	7	49.3	15.641	9.267			27.9539	27.6458	27.7895	28.1507	27.7325	27.8974	28.0965	28.3196	NaN	28.0711	28.3578	28.0965
Q15392	Delta(24)-sterol reductase	DHCR24	12	12	33.3	60.101	28.08			30.362	29.7895	29.9677	30.6881	30.4823	30.4629	29.7244	29.9677	30.099	29.995	30.0217	29.6747
Q6DKJ4	Nucleoredoxin	NXN	14	14	48.3	48.392	89.256			29.4804	29.5259	29.6372	29.3367	29.3494	29.3787	29.7453	29.788	29.6128	30.0217	29.6407	29.3153
O15269	Serine palmitoyltransferase 1	SPTLC1	9	9	26	52.743	67.69			28.0137	28.6595	28.5609	NaN	27.5014	28.1115	28.7833	28.6389	29.2007	28.8682	28.8564	28.8682
Q9ULU4	Protein kinase C-binding protein 1	ZMYND8	11	11	15.6	131.69	38.801			26.632	26.7389	26.6998	26.8142	26.9316	26.9088	26.2696	26.6181	26.417	NaN	NaN	26.4105
P56192	Methionine--tRNA ligase, cytoplasmic	MARS	32	32	44.3	101.11	323.31			31.5844	31.1544	30.8309	31.5389	31.0414	30.8682	32.0544	32.0479	31.8534	32.1422	31.9117	31.7965
Q96EY4	Translation machinery-associated protein 16	TMA16	5	5	37.4	23.864	18.161			27.4234	26.8019	27.341	27.2979	27.1312	27.3324	27.3662	27.2979	27.2891	NaN	27.17	27.391
P52735	Guanine nucleotide exchange factor VAV2	VAV2	16	16	28	101.29	167.75			25.8788	NaN	NaN	NaN	NaN	NaN	28.7613	29.3324	29.1065	29.2007	29.0737	28.877
Q9Y4C8	Probable RNA-binding protein 19	RBM19	8	8	14.2	107.33	22.81			26.8142	26.7771	26.8741	26.9428	26.632	26.5448	26.7645	26.673	26.4953	26.7129	26.3926	26.726
P38432	Coilin	COIL	12	12	26.4	62.608	39.649			28.5315	27.8858	27.9484	28.1115	27.7325	28.4073	26.604	26.976	26.9977	26.9977	26.4008	27.0401
P25398	40S ribosomal protein S12	RPS12	8	8	70.5	14.515	186.3			32.9347	32.8847	32.8645	32.8937	32.7453	32.7453	32.7907	32.6565	32.6544	32.715	32.7474	32.5527
Q96TA1	Niban-like protein 1	FAM129B	13	13	26.5	84.137	36.754			28.0505	27.8916	27.7453	27.604	27.4629	27.5315	28.4154	28.49	28.7129	28.5573	28.4862	28.5052
P55072	Transitional endoplasmic reticulum ATPase	VCP	57	57	76.6	89.321	323.31			34.4823	34.5922	34.6944	34.5002	34.6361	34.6787	34.0832	34.1146	34.1453	34.1223	34.0832	34.0592
P07311	Acylphosphatase-1	ACYP1	3	3	32.3	11.261	4.6803			NaN	NaN	NaN	NaN	NaN	NaN	NaN	26.604	NaN	NaN	26.6865	26.4551
Q13243	Serine/arginine-rich splicing factor 5	SRSF5	7	6	27.6	31.263	15.312			28.2399	27.9869	27.9484	28.4274	27.8445	28.3109	27.8203	28.1459	28.1604	NaN	27.726	28.2714
P05455	Lupus La protein	SSB	30	30	58.1	46.836	169.55			32.1115	31.8081	31.8829	32.3594	31.9045	31.9435	33.3956	33.4334	32.8992	33.4209	33.2478	33
A1L0T0	Acetolactate synthase-like protein	ILVBL	10	10	31.8	67.867	123.72			28.1747	27.9814	28.0243	28.2399	28.1556	28.1361	27.9705	28.341	28.2445	28.0453	28.0813	28.3494
O75436	Vacuolar protein sorting-associated protein 26A	VPS26A	17	15	62.1	38.169	305.65			30.362	30.2308	30.1842	30.3724	30.2647	30.2077	30.3303	30.4134	30.2869	30.5296	30.2979	30.099
Q9UNS2	COP9 signalosome complex subunit 3	COPS3	10	10	35.7	47.873	261.94			29.7517	29.4473	29.5315	29.5951	29.4919	29.3787	29.7833	29.7486	29.6181	29.9117	29.6646	29.4649
O14933	Ubiquitin/ISG15-conjugating enzyme E2 L6	UBE2L6	5	5	56.9	17.769	41.902			29.0427	28.2625	28.7549	28.8682	28.2077	28.7988	29.0583	28.6663	28.0349	29.1239	28.2262	28.3282
P61160	Actin-related protein 2	ACTR2	16	16	54.6	44.76	149.4			31.2647	31.3724	31.4083	31.2979	31.3033	31.3142	32.4234	32.3542	32.4775	32.3356	32.4507	32.3905
O60888	Protein CutA	CUTA	5	5	40.2	19.116	86.131			30.4134	30.1361	29.7453	30.611	30.0609	29.7739	31.4532	31.4775	31.3088	31.4967	31.3672	31.2924
P62837;P61077	Ubiquitin-conjugating enzyme E2 D2;Ubiquitin-conjugating enzyme E2 D3	UBE2D2;UBE2D3	3	3	36.1	16.735	9.5905			30.7292	30.4532	30.4629	30.4823	30.3828	NaN	30.4334	30.0609	30.3515	30.2077	30.2422	30.3515
Q00613	Heat shock factor protein 1	HSF1	3	3	8.9	57.26	12.272			NaN	28.0349	28.267	27.9705	28.003	28.2216	28.019	28.0401	27.9316	NaN	28.0609	27.8741
O15145	Actin-related protein 2/3 complex subunit 3	ARPC3	10	10	50	20.546	75.433			29.6831	29.7864	29.8355	29.8593	29.7047	29.7533	30.8004	30.933	30.9539	30.7047	30.9882	30.9045
P08240	Signal recognition particle receptor subunit alpha	SRPR	21	21	44.8	69.81	131.55			29.9117	29.4862	29.766	29.9117	29.7421	29.6865	29.5315	29.6337	29.5296	29.6998	29.4154	29.49
Q8WUP2	Filamin-binding LIM protein 1	FBLIM1	12	12	37.3	40.669	69.638			29.8519	29.9117	30.2869	29.2979	29.668	29.7162	29.2979	29.3196	29.893	29.2445	29.393	29.8188
P51812	Ribosomal protein S6 kinase alpha-3	RPS6KA3	21	15	36.2	83.735	52.182			29.4433	29.3346	29.4433	29.8234	29.4194	29.5609	29.8916	29.9539	29.5808	29.7771	29.9677	29.6075
O95785	Protein Wiz	WIZ	9	9	9.7	178.67	73.264			26.5463	26.3342	26.2372	26.7895	26.4105	NaN	27.0084	27.019	27.0505	NaN	26.8504	27.141
Q16543	Hsp90 co-chaperone Cdc37;Hsp90 co-chaperone Cdc37, N-terminally processed	CDC37	13	13	35.7	44.468	90.317			30.1239	30.196	30.0609	30.0349	29.995	29.8974	30.6881	30.7927	30.8234	30.9188	30.5844	30.7129
P61457	Pterin-4-alpha-carbinolamine dehydratase	PCBD1	6	6	66.3	11.999	25.998			28.9203	29.2647	28.9869	28.965	29.2557	29.0296	29.1239	29.3324	28.7549	29.1312	29.2625	28.7549
P35222	Catenin beta-1	CTNNB1	14	11	28.9	85.496	39.159			28.066	28.4433	27.9372	27.2445	27.6595	27.9814	28.7031	28.8799	28.5389	28.362	28.5898	29.0401
Q9Y5B0	RNA polymerase II subunit A C-terminal domain phosphatase	CTDP1	3	3	5.7	104.4	8.8499			25.0975	NaN	25.3135	NaN	NaN	25.0813	NaN	NaN	24.8997	NaN	NaN	24.8764
Q14232	Translation initiation factor eIF-2B subunit alpha	EIF2B1	11	11	44.3	33.712	51.708			29.5315	29.2422	29.3303	29.5222	29.4214	29.3174	30.2422	30.3515	30.1724	30.4823	30.3196	29.8112
O00410	Importin-5	IPO5	44	42	60.8	123.63	323.31			32.2336	32.0084	31.8042	32.099	31.8234	31.7613	33.0816	33.1989	33.0495	33.1753	33.1407	32.9365
O43491	Band 4.1-like protein 2	EPB41L2	37	35	53	112.59	303.77			31.8497	32.0017	31.7888	31.6198	31.947	31.5754	31.2591	31.1177	31.4919	31.3724	31.0927	31.3463
O14949	Cytochrome b-c1 complex subunit 8	UQCRQ	1	1	15.9	9.9062	23.173			27.7453	27.8974	28.1065	28.1795	28.019	28.0711	28.3951	27.8142	28.2308	NaN	27.9316	28.3282
P35813	Protein phosphatase 1A	PPM1A	14	13	51.6	42.447	58.004			29.141	28.9372	28.8564	29.2007	29.2285	28.9539	28.9428	29.1214	28.7357	28.8623	28.9869	28.9031
Q96B26	Exosome complex component RRP43	EXOSC8	3	3	18.1	30.039	12.688			26.2426	NaN	26.2607	26.4202	26.0105	26.2996	26.17	26.2463	26.0609	26.3376	26.0854	25.9694
Q5JU69	Torsin-2A	TOR2A	3	3	13.7	35.714	5.3831			NaN	NaN	NaN	NaN	NaN	NaN	NaN	NaN	26.2133	NaN	NaN	26.1927
Q9UKF6	Cleavage and polyadenylation specificity factor subunit 3	CPSF3	14	14	32.3	77.485	83.634			29.4012	29.4154	29.3828	29.3848	29.4032	29.3196	28.9316	28.8945	28.9677	29.0634	28.9002	28.7486
Q5QJ74	Tubulin-specific chaperone cofactor E-like protein	TBCEL	4	4	14.4	48.194	5.8691			NaN	NaN	NaN	NaN	NaN	NaN	26.3992	26.524	26.2058	NaN	NaN	26.3595
P45974	Ubiquitin carboxyl-terminal hydrolase 5	USP5	32	28	49.3	95.785	241.32			32.1694	32.1422	32.2507	32.2106	32.1694	32.2675	32.881	32.8919	32.8234	32.8571	32.8195	32.8553
Q5XXA6	Anoctamin-1	ANO1	27	27	31.5	114.08	168.57			31.362	31.3088	31.2193	31.5618	31.3776	31.3672	31.8755	31.9677	31.9081	31.9677	31.8829	31.8347
Q14257	Reticulocalbin-2	RCN2	13	13	53.9	36.876	307.86			32.393	32.4799	32.196	32.3879	32.6544	32.1783	31.6544	31.6458	31.8081	31.6022	31.611	31.8271
P31948	Stress-induced-phosphoprotein 1	STIP1	37	37	61.3	62.639	323.31			34.4943	34.4272	34.1753	34.5121	34.4146	34.0911	34.3303	34.3502	34.0673	34.4146	34.2828	33.9591
O95379	Tumor necrosis factor alpha-induced protein 8	TNFAIP8	5	5	46.5	23.003	10.373			NaN	NaN	NaN	NaN	NaN	NaN	28.5278	28.8858	NaN	28.9344	28.8564	28.189
Q9ULC3	Ras-related protein Rab-23	RAB23	5	5	30	26.659	4.1502			NaN	NaN	NaN	NaN	NaN	NaN	26.9539	26.9977	26.9088	NaN	NaN	26.9316
P27824	Calnexin	CANX	28	28	46.1	67.567	323.31			34.0266	33.7553	33.7047	33.9848	33.9242	33.6307	33.8516	34.0266	33.8883	33.8042	34.0753	33.8138
O60641	Clathrin coat assembly protein AP180	SNAP91	11	9	20.2	92.501	144.51			28.9923	29.4629	30.4334	29.0634	29.9677	30.5664	28.726	28.8445	28.49	NaN	29.003	28.2445
P62195	26S protease regulatory subunit 8	PSMC5	26	25	64.3	45.626	312.16			32.08	32.2135	32.2279	32.0447	32.0512	32.1842	31.7413	31.6798	31.7088	31.7453	31.6066	31.717
P09382	Galectin-1	LGALS1	9	9	86.7	14.716	176.84			34.1679	34.4763	34.6415	34.1223	34.6735	34.6253	34.1828	34.0911	34.1453	33.8138	34.3033	34.1975
P49356	Protein farnesyltransferase subunit beta	FNTB	4	4	17.2	48.773	20.201			27.0296	26.6458	26.5725	26.8623	26.9539	26.604	NaN	NaN	26.9428	26.965	NaN	26.8858
O96019	Actin-like protein 6A	ACTL6A	15	15	47.6	47.46	164.92			32.0479	31.9882	31.8829	32.1146	31.933	31.8422	31.6242	31.5844	31.7088	31.7533	31.4775	31.6154
P62314	Small nuclear ribonucleoprotein Sm D1	SNRPD1	4	4	54.6	13.281	30.719			31.3196	30.9746	30.9677	31.2759	31.2422	30.9539	30.8682	30.8309	31.0414	30.933	30.7849	30.9677
Q9C0B1	Alpha-ketoglutarate-dependent dioxygenase FTO	FTO	13	13	37.6	58.281	225.07			28.9567	28.8324	28.8623	29.3109	28.8829	28.8415	29.3044	29.2781	29.2007	29.1628	29.109	29.4354
Q12789	General transcription factor 3C polypeptide 1	GTF3C1	18	18	13.2	238.87	41.676			28.1263	28.1795	28.019	28.0864	28.0453	28.1842	28.0296	27.6251	28.3109	NaN	27.7389	28.217
Q9BT22	Chitobiosyldiphosphodolichol beta-mannosyltransferase	ALG1	4	4	12.9	52.518	6.5893			NaN	NaN	27.2445	26.518	NaN	26.7895	27.2353	27.5315	27.3494	NaN	27.341	27.3828
P51572	B-cell receptor-associated protein 31	BCAP31	6	6	20.7	27.991	36.064			29.2353	28.7864	28.7958	29.189	28.9316	28.8142	28.8711	28.7517	28.8264	29.027	28.5718	28.7613
Q13416	Origin recognition complex subunit 2	ORC2	5	5	13.5	65.971	10.481			25.6944	25.9383	25.4266	NaN	NaN	NaN	NaN	26.0084	25.7619	NaN	NaN	25.8717
P43686	26S protease regulatory subunit 6B	PSMC4	27	27	83	47.366	211.72			31.8081	31.8042	31.8829	31.6285	31.7731	31.8792	31.5062	31.6242	31.5435	31.6372	31.3724	31.5978
P55083	Microfibril-associated glycoprotein 4	MFAP4	4	4	36.1	28.648	28.794			29.524	29.8385	28.9539	29.7211	29.94	29.6337	31.611	31.3724	31.1483	31.6066	30.8901	31.5109
Q15293	Reticulocalbin-1	RCN1	18	18	58.9	38.89	278.05			31.8865	31.7771	31.4823	32.0447	31.8271	31.5844	32.781	32.7731	32.7494	32.5481	32.7771	32.9045
O76003	Glutaredoxin-3	GLRX3	19	19	67.2	37.432	137.03			31.9539	32.025	32.1146	31.9814	31.846	31.9746	31.3879	31.2422	31.5435	31.4775	31.362	31.2924
Q04206	Transcription factor p65	RELA	10	10	23.2	60.218	31.823			28.341	28.6595	28.5165	28.3662	28.362	28.4234	28.6697	28.6285	28.4668	28.8504	28.55	28.2625
P07384	Calpain-1 catalytic subunit	CAPN1	13	13	28.9	81.889	24.855			27.6998	27.4629	27.9146	27.9539	27.8799	28.3066	28.4154	28.3066	28.6075	28.0965	28.3153	28.7927
Q9Y224	UPF0568 protein C14orf166	C14orf166	18	18	70.5	28.068	192.72			31.6285	31.5296	31.2703	31.2814	31.2979	31.1783	30.6629	30.7453	30.6372	30.5844	30.6881	30.7129
P04049	RAF proto-oncogene serine/threonine-protein kinase	RAF1	7	5	19	73.051	31.451			27.3153	NaN	27.1795	NaN	NaN	NaN	27.5315	27.3494	27.9259	NaN	NaN	27.611
P62714	Serine/threonine-protein phosphatase 2A catalytic subunit beta isoform	PPP2CB	14	1	58.6	35.575	239.5			32.0769	31.9188	31.8682	32.025	31.8042	31.7927	31.9295	31.8901	31.8271	31.9153	31.94	31.7373
Q92572	AP-3 complex subunit sigma-1	AP3S1	3	3	19.2	21.732	40.03			NaN	NaN	NaN	NaN	NaN	NaN	26.9088	NaN	NaN	NaN	NaN	26.8974
P43034	Platelet-activating factor acetylhydrolase IB subunit alpha	PAFAH1B1	17	17	52.2	46.637	323.31			30.393	30.4433	30.4629	30.4532	30.4433	30.2077	30.7927	30.8157	30.7047	30.8974	30.6964	30.6713
Q13613	Myotubularin-related protein 1	MTMR1	9	8	23.3	74.677	44.762			26.4488	26.8019	26.6998	NaN	NaN	26.7645	27.2979	27.4551	27.0609	27.3578	26.9539	27.4473
Q9BYT8	Neurolysin, mitochondrial	NLN	15	15	28.3	80.651	89.429			28.6561	28.5862	29.0686	28.9512	28.6964	29.267	28.4032	28.3282	28.4823	28.0813	28.4274	28.6146
P61081	NEDD8-conjugating enzyme Ubc12	UBE2M	4	4	25.1	20.9	9.9372			28.524	28.4073	28.8711	28.5536	28.6146	28.6831	28.524	28.8234	28.4707	28.0137	28.8203	28.8234
Q15018	BRISC complex subunit Abro1	FAM175B	6	6	23.4	46.9	17.686			27.1115	27.4154	27.0914	27.4314	27.2077	27.341	26.9977	27.2077	27.0505	NaN	27.2625	26.8504
Q9NQX7	Integral membrane protein 2C;CT-BRI3	ITM2C	6	6	31.8	30.223	11.402			NaN	NaN	NaN	28.2935	28.5315	27.9869	27.4314	27.8019	NaN	27.4785	27.604	27.7453
Q14677	Clathrin interactor 1	CLINT1	11	11	24.5	68.259	43.632			29.0505	28.8504	28.9705	29.0889	29.0003	28.8385	28.7833	28.9174	28.9316	28.9869	28.6424	28.94
Q13555	Calcium/calmodulin-dependent protein kinase type II subunit gamma	CAMK2G	10	7	29.6	62.606	36.028			28.7708	28.9732	29.099	28.7927	29.2353	29.0762	28.7195	28.8887	29.0609	28.8173	28.8081	29.0137
Q9UL46	Proteasome activator complex subunit 2	PSME2	9	9	57.3	27.401	85.979			30.1361	29.8901	29.7244	29.7911	29.8188	29.6629	30.9882	31.1052	30.5844	31.0609	30.9609	30.6372
P55036	26S proteasome non-ATPase regulatory subunit 4	PSMD4	10	8	38.5	40.736	133.09			30.5481	30.5844	30.5573	30.6372	30.7849	30.6285	30.6713	30.6629	30.8608	30.7927	30.6713	30.6881
Q9H7D7	WD repeat-containing protein 26	WDR26	14	14	37.2	72.123	263.99			30.1361	30.0349	30.2077	30.1724	29.9539	29.9677	29.8974	29.8755	29.893	29.9117	29.84	29.8711
P07919	Cytochrome b-c1 complex subunit 6, mitochondrial	UQCRH	2	2	29.7	10.739	102.02			29.7723	29.6948	29.7597	30.0084	29.846	30.1239	29.5573	30.2077	30.0479	29.8279	30.1604	29.8415
Q5T4S7	E3 ubiquitin-protein ligase UBR4	UBR4	93	93	27.3	573.83	323.31			32.0609	32.08	31.9259	32.015	31.9814	32.08	32.0927	32.08	32.0117	32.1901	32.0769	31.8608
Q15070	Mitochondrial inner membrane protein OXA1L	OXA1L	5	5	12.4	48.547	5.0774			27.3745	NaN	27.2077	27.3324	27.189	27.4707	27.1312	NaN	27.2535	NaN	27.019	27.3239
P43246	DNA mismatch repair protein Msh2	MSH2	28	28	39.4	104.74	76.618			31.0609	30.8755	30.9188	31.2019	31.015	31.0609	30.7613	30.7927	30.7927	30.6022	30.7211	30.9539
P60981	Destrin	DSTN	9	8	58.8	18.506	21.076			29.843	30.0479	30.1842	29.5646	30.1115	30.0479	30.196	30.2422	30.1361	30.2979	30.1239	30.1115
Q15436	Protein transport protein Sec23A	SEC23A	28	25	56.7	86.16	323.31			31.0479	30.8534	30.8385	31.08	31.0609	30.995	31.8865	31.8497	31.7613	31.6964	31.7373	32.0117
Q9NPD3	Exosome complex component RRP41	EXOSC4	6	6	30.2	26.383	17.858			27.6931	27.7129	27.509	27.9259	27.7389	27.5754	27.604	27.7581	27.8445	27.2625	27.8019	28.0137
Q01968	Inositol polyphosphate 5-phosphatase OCRL-1	OCRL	9	9	13.9	104.2	15.649			26.4676	27.5754	27.0401	26.7517	26.7895	26.4583	26.8385	26.673	26.506	NaN	26.7129	26.6181
O15498	Synaptobrevin homolog YKT6	YKT6	6	6	44.4	22.417	29.024			29.2445	29.5933	29.4154	29.203	29.4093	29.3848	29.4374	29.5518	29.5222	29.5481	29.6058	29.3044
Q9BZH6	WD repeat-containing protein 11	WDR11	14	14	18.7	136.68	32.762			27.0813	27.2803	27.4154	27.3153	27.4862	27.6181	27.4073	27.17	27.2077	27.4707	27.2714	26.9869
O95816	BAG family molecular chaperone regulator 2	BAG2	8	8	61.1	23.772	265.21			29.8415	30.0737	29.9117	29.6831	29.94	29.7833	30.1724	30.2422	30.4532	30.4433	30.1604	30.2308
P49588	Alanine--tRNA ligase, cytoplasmic	AARS	42	42	61.9	106.81	323.31			33.7946	33.5641	33.3169	33.9153	33.5978	33.3568	34.13	34.1223	33.8422	34.3101	34.0017	33.715
Q15019	Septin-2	2020-09-02	17	17	65.4	41.487	310.98			32.3489	32.5481	32.4433	32.2979	32.5732	32.4919	32.0958	32.0769	32.196	32.2077	31.8937	32.2164
P29144	Tripeptidyl-peptidase 2	TPP2	40	40	43.8	138.35	259.48			30.9045	30.7849	30.6629	31.0349	30.8682	30.5664	31.3982	31.3982	31.3088	31.5203	31.3776	31.1544
O00425	Insulin-like growth factor 2 mRNA-binding protein 3	IGF2BP3	10	9	23.7	63.704	20.797			30.4134	30.1483	29.7864	30.6198	30.362	30.0349	30.0479	30.2869	30.196	29.9259	30.0737	30.4532
P61586	Transforming protein RhoA	RHOA	12	4	73.1	21.768	105.09			31.8937	32.0512	32.0117	32.005	32.196	31.9609	32.2279	32.2897	31.9435	32.2393	32.1453	32.0641
Q86TI2	Dipeptidyl peptidase 9	DPP9	18	18	25.6	98.262	30.556			28.3787	28.2714	28.5426	28.3869	28.4394	28.4234	28.6146	28.5426	28.4354	28.8711	28.1984	28.4234
P22059	Oxysterol-binding protein 1	OSBP	20	18	43.6	89.42	129			29.8974	29.9117	29.6663	29.846	29.7911	29.7227	30.0217	29.8872	29.8504	30.0737	30.0479	29.55
O43913	Origin recognition complex subunit 5	ORC5	7	7	26.4	50.282	11.667			NaN	25.6209	25.5638	25.6622	NaN	25.5404	25.5433	25.5135	25.4892	NaN	25.5725	25.4362
P59998	Actin-related protein 2/3 complex subunit 4	ARPC4	7	7	54.2	19.667	19.028			30.4823	30.5664	30.6964	30.3515	30.5389	30.5573	31.8309	31.7047	31.7573	31.8645	31.717	31.6839
Q9ULJ7	Ankyrin repeat domain-containing protein 50	ANKRD50	8	8	12.4	155.86	28.583			NaN	NaN	NaN	NaN	NaN	NaN	26.965	26.9428	27.1214	NaN	26.726	27.2353
Q9P0I2	ER membrane protein complex subunit 3	EMC3	6	6	40.2	29.952	64.658			28.217	27.7195	28.1015	28.3023	28.0084	28.1842	28.0557	28.5718	28.2625	28.0296	28.4433	28.3992
P37235	Hippocalcin-like protein 1	HPCAL1	10	8	57.5	22.313	150.31			28.7802	28.9512	28.8741	28.8858	28.9002	28.9372	29.7864	30.0217	30.0737	30.196	29.837	29.8096
P48444	Coatomer subunit delta	ARCN1	25	25	55	57.21	62.226			30.8608	30.9188	30.94	30.8385	30.9539	30.94	31.0609	31.0217	31.0414	31.0864	30.9539	31.0544
Q9H223	EH domain-containing protein 4	EHD4	11	9	28.8	61.174	18.298			27.8504	28.0813	27.8504	27.5682	27.8799	27.6663	NaN	NaN	27.6527	NaN	NaN	27.6458
P62191	26S protease regulatory subunit 4	PSMC1	25	25	63	49.184	304.97			32.0184	32.2563	32.3115	31.7692	32.0479	32.0283	31.4234	31.5889	31.5203	31.7252	31.362	31.393
Q99567	Nuclear pore complex protein Nup88	NUP88	10	10	22.7	83.541	293.83			28.7771	28.8474	28.6629	28.7708	28.7708	28.7064	28.7421	28.5426	28.5862	28.55	28.6931	28.6075
Q13619	Cullin-4A	CUL4A	18	11	32.9	87.679	33.417			28.49	27.8504	28.49	28.3153	28.3745	28.4032	28.8916	28.9705	28.7421	28.632	29.1239	28.7895
Q8N335	Glycerol-3-phosphate dehydrogenase 1-like protein	GPD1L	4	4	14.8	38.418	5.1282			NaN	NaN	NaN	26.5898	NaN	NaN	26.8142	NaN	NaN	NaN	NaN	26.8019
Q6P2E9	Enhancer of mRNA-decapping protein 4	EDC4	40	40	49.5	151.66	323.31			30.8234	30.7927	30.7047	30.6964	30.7613	30.6198	30.7292	30.6964	30.7849	30.7613	30.7849	30.6458
Q9P2I0	Cleavage and polyadenylation specificity factor subunit 2	CPSF2	14	14	29.8	88.486	31.256			28.2399	28.2714	28.4512	28.1361	28.3109	28.3745	28.0557	28.1214	28.0243	28.203	28.0453	27.9259
P53004	Biliverdin reductase A	BLVRA	13	13	48	33.428	38.022			29.9259	29.5014	29.9117	30.1724	29.6931	30.0084	29.0453	29.2736	29.003	29.2147	28.6831	29.3388
O43414	ERI1 exoribonuclease 3	ERI3	3	3	14.2	37.238	7.1126			27.3494	NaN	26.9316	27.4938	NaN	27.0914	27.6798	NaN	NaN	27.604	27.9259	27.4473
Q6L8Q7	2,5-phosphodiesterase 12	PDE12	8	8	23.8	67.351	44.154			28.3452	28.4707	28.4629	28.4314	28.217	28.3578	28.0505	28.1115	28.1115	NaN	27.9977	28.17
O43169	Cytochrome b5 type B	CYB5B	5	5	53.4	16.332	65.387			29.9539	29.4174	29.393	29.7146	29.8157	29.4012	29.4433	29.8339	29.9539	29.4765	29.7389	30.0084
P52788	Spermine synthase	SMS	20	20	68	41.268	156.1			30.947	30.7211	30.9117	30.8974	30.8682	30.8309	31.1604	31.1422	30.8234	31.2924	31.1361	30.6285
P01116	GTPase KRas;GTPase KRas, N-terminally processed	KRAS	6	1	40.7	21.656	12.941			27.6798	27.7195	27.7195	27.7453	27.604	NaN	27.6931	28.066	27.9595	27.7064	27.6663	28.2714
Q9NP97;Q8TF09	Dynein light chain roadblock-type 1;Dynein light chain roadblock-type 2	DYNLRB1;DYNLRB2	6	6	82.3	10.921	25.955			30.1483	30.2308	30.0349	30.0217	30.2535	30.0479	30.1483	29.9677	29.9117	30.0217	30.0609	29.94
Q8WTW3	Conserved oligomeric Golgi complex subunit 1	COG1	10	10	18.2	108.98	35.869			NaN	26.2096	26.1927	26.4908	26.632	26.217	27.3153	27.5389	27.2262	27.0505	27.6865	27.2714
P63151	Serine/threonine-protein phosphatase 2A 55 kDa regulatory subunit B alpha isoform	PPP2R2A	14	7	43	51.691	114.8			29.6492	29.2308	29.3992	29.5591	29.389	29.3153	29.4053	29.4995	29.2825	29.668	29.2399	29.2262
Q9UNI6	Dual specificity protein phosphatase 12	DUSP12	5	5	26.2	37.687	17.904			26.8974	26.3662	26.5609	26.8264	26.5696	26.527	26.7895	26.976	26.7517	26.604	27.1214	26.7517
P30153	Serine/threonine-protein phosphatase 2A 65 kDa regulatory subunit A alpha isoform	PPP2R1A	31	23	65.5	65.308	323.31			33.4334	33.3698	33.3828	33.5641	33.2619	33.2759	33.5527	33.5641	33.4702	33.715	33.4823	33.3568
P26640	Valine--tRNA ligase	VARS	43	43	51.7	140.47	210.21			31.4284	31.0927	31.1239	31.4967	31.1544	31.1604	32.1842	32.196	32.1453	32.3088	32.1453	32.0479
Q9P2D3	HEAT repeat-containing protein 5B	HEATR5B	6	6	6.1	224.3	17.517			26.0547	26.1719	NaN	NaN	26.019	NaN	26.5898	26.0422	26.2058	NaN	NaN	26.2944
O15031	Plexin-B2	PLXNB2	23	23	18.2	205.12	167.52			28.3578	28.341	28.1361	28.391	28.4512	28.3951	28.805	28.8653	28.6285	28.6389	28.8829	28.7676
P67809	Nuclease-sensitive element-binding protein 1	YBX1	19	14	69.4	35.924	323.31			33.2164	33.3956	33.0479	33.1115	32.9695	32.9063	32.7613	32.5062	32.7494	33.0233	32.6044	32.3061
P43487	Ran-specific GTPase-activating protein	RANBP1	8	8	59.7	23.31	91.198			31.9574	31.7849	31.7333	31.8157	31.7533	31.7613	31.9712	31.9224	31.8571	32.0283	31.947	31.7573
Q9Y221	60S ribosome subunit biogenesis protein NIP7 homolog	NIP7	5	5	40.6	20.462	18.941			28.509	28.0813	28.249	28.1065	28.2535	28.3109	28.267	27.6527	27.726	NaN	NaN	27.9088
O00139	Kinesin-like protein KIF2A	KIF2A	11	10	19.3	79.954	36.943			27.7833	27.7195	27.7771	27.6865	27.7389	28.0084	27.5536	27.5315	27.3745	27.341	27.5165	27.5826
O95425	Supervillin	SVIL	18	18	13.8	247.74	32.619			NaN	NaN	NaN	NaN	NaN	NaN	27.5754	27.2625	27.3494	NaN	27.3992	NaN
Q9H4A6	Golgi phosphoprotein 3	GOLPH3	8	6	31.2	33.81	91.575			28.8264	29.0788	29.0609	28.7129	28.9287	28.9539	29.1628	29.1652	29.0965	29.2422	29.0479	29.1239
P17655	Calpain-2 catalytic subunit	CAPN2	13	13	27.4	79.994	57.271			29.2376	29.7453	29.3346	29.3704	29.7549	29.5071	27.8203	27.9814	27.5536	NaN	27.8682	27.7195
O95155	Ubiquitin conjugation factor E4 B	UBE4B	15	15	19.6	146.18	30.083			27.7517	28.249	28.0137	27.4938	27.8682	27.8445	NaN	26.4473	27.0813	26.9428	NaN	26.632
O43707	Alpha-actinin-4	ACTN4	58	39	70.8	104.85	323.31			34.3101	34.5238	34.4083	34.2048	34.402	34.3033	34.2478	34.3303	34.5296	34.4209	34.1975	34.4823
Q9UM54	Unconventional myosin-VI	MYO6	47	47	46.4	149.69	323.31			30.7849	30.1724	30.362	31.1422	30.4032	30.5664	32.245	32.4702	31.6544	32.463	32.2869	31.611
Q96BM9	ADP-ribosylation factor-like protein 8A	ARL8A	6	4	36	21.416	46.867			28.4394	28.673	28.6005	28.6998	28.965	28.7389	28.8504	29.0686	29.0164	28.6629	29.326	28.8829
Q8TB61	Adenosine 3-phospho 5-phosphosulfate transporter 1	SLC35B2	7	7	17.4	47.514	13.724			NaN	NaN	27.8019	27.4394	27.5826	NaN	28.4194	28.0505	28.2077	28.4073	27.8264	28.3992
Q8IUR7	Armadillo repeat-containing protein 8	ARMC8	16	16	32.7	75.509	112.61			28.5969	28.4938	28.5969	28.4073	28.341	28.2803	28.5898	28.7802	28.7549	28.9841	28.632	28.4746
O60884	DnaJ homolog subfamily A member 2	DNAJA2	15	15	53.6	45.745	109.6			30.6713	30.4334	30.4823	30.5296	30.341	30.1724	30.1842	30.341	30.2535	30.3724	30.1724	30.2422
O60287	Nucleolar pre-ribosomal-associated protein 1	URB1	11	11	8.1	254.39	15.931			27.189	26.8974	26.976	26.6865	NaN	26.4723	26.8974	26.3477	26.7389	NaN	NaN	26.6865
Q16563	Synaptophysin-like protein 1	SYPL1	3	3	19.7	28.565	19.546			28.632	28.7325	NaN	28.604	28.5969	28.5862	28.6663	NaN	NaN	NaN	NaN	28.6697
P09234	U1 small nuclear ribonucleoprotein C	SNRPC	2	2	18.9	17.394	77.057			30.1361	30.2535	30.1115	30.4629	30.4134	30.1115	30.1724	30.0609	30.2077	30.0479	30.2535	30.1483
Q15233	Non-POU domain-containing octamer-binding protein	NONO	24	23	59.2	54.231	323.31			33.3956	33.4334	33.4334	33.4823	33.4823	33.4209	32.8176	32.781	32.9347	32.7868	32.8422	32.9188
Q13561	Dynactin subunit 2	DCTN2	14	14	49.1	44.23	90.192			30.995	30.9259	30.9188	30.8385	31.099	30.9677	31.0017	30.9539	30.9677	31.3196	30.8004	30.7533
P27487	Dipeptidyl peptidase 4;Dipeptidyl peptidase 4 membrane form;Dipeptidyl peptidase 4 soluble form	DPP4	11	11	18	88.278	11.949			26.3894	NaN	NaN	NaN	NaN	NaN	28.4234	28.1164	28.4823	27.5536	28.3828	28.8504
P11441	Ubiquitin-like protein 4A	UBL4A	6	6	45.9	17.776	12.656			28.5389	28.3109	28.2353	28.5969	28.141	28.189	28.4785	28.189	28.5278	28.6216	28.1937	28.3869
O43617	Trafficking protein particle complex subunit 3	TRAPPC3	7	7	48.9	20.274	31.283			28.0711	27.9428	28.019	28.1459	27.8564	27.7453	28.3704	28.509	28.2625	28.8019	28.4433	27.7325
Q9HCU5	Prolactin regulatory element-binding protein	PREB	10	10	39.3	45.468	48.346			28.267	28.2123	28.391	28.2353	28.0505	28.5014	28.1795	28.5646	28.4629	28.4551	28.5573	28.2216
Q9NWT1	p21-activated protein kinase-interacting protein 1	PAK1IP1	4	4	14.8	43.963	3.5077			NaN	NaN	NaN	NaN	NaN	NaN	26.228	NaN	NaN	NaN	26.2353	NaN
P49773	Histidine triad nucleotide-binding protein 1	HINT1	9	9	78.6	13.802	56.264			31.7252	31.3196	31.2814	31.7211	31.2814	31.4032	30.8004	30.4629	30.9188	NaN	30.196	31.1422
Q01518	Adenylyl cyclase-associated protein 1	CAP1	27	26	65.7	51.901	323.31			34.0349	33.87	33.7751	34.1828	33.9063	33.8234	33.8422	33.7353	33.8422	33.9417	33.7453	33.7553
Q5BKZ1	DBIRD complex subunit ZNF326	ZNF326	10	10	24.7	65.653	63.434			29.1361	29.1065	29.0813	29.17	28.9705	29.0057	27.9595	27.9977	28.4274	28.3951	27.9484	28.0711
Q16401	26S proteasome non-ATPase regulatory subunit 5	PSMD5	22	22	56	56.195	91.764			31.2479	31.2924	31.4134	31.3463	31.2814	31.3982	32.2759	32.2842	32.1483	32.2759	32.3223	32.1331
P17980	26S protease regulatory subunit 6A	PSMC3	22	22	65.8	49.203	290.34			32.3436	32.4702	32.3982	32.2535	32.375	32.4209	31.8004	31.9081	31.8755	32.0316	31.8081	31.7533
Q9NYL9	Tropomodulin-3	TMOD3	14	14	47.7	39.594	139.33			29.7771	29.6163	29.7341	29.7581	29.5933	29.8081	30.1724	30.0479	29.9259	30.0349	30.0737	30.0609
P39687	Acidic leucine-rich nuclear phosphoprotein 32 family member A	ANP32A	9	5	46.6	28.585	116.16			30.7849	31.13	31.0864	31.015	31.2591	31.0479	30.7292	30.7373	30.9814	30.2535	30.6629	31.3515
O14617	AP-3 complex subunit delta-1	AP3D1	28	28	33	130.16	150.54			30.0609	29.9814	30.0737	29.9539	30.0084	29.9117	30.5844	30.5389	30.3724	30.5933	30.4433	30.4919
Q15418	Ribosomal protein S6 kinase alpha-1	RPS6KA1	14	8	33.2	82.722	49.33			28.1937	27.6251	27.7195	28.3324	27.4551	27.604	27.6389	27.3066	27.019	27.4394	NaN	27.2535
Q8NHQ9	ATP-dependent RNA helicase DDX55	DDX55	6	6	14.8	68.546	9.7693			NaN	26.0629	NaN	NaN	26.143	25.9134	NaN	26.0359	NaN	NaN	26.0464	NaN
Q96SU4	Oxysterol-binding protein-related protein 9	OSBPL9	8	8	16.2	83.184	9.2432			NaN	26.1546	NaN	26.2996	26.1135	25.9781	27.0401	26.8623	27.1604	27.4473	26.8142	26.7389
O43592	Exportin-T	XPOT	20	20	28.1	109.96	59.437			29.9117	29.6595	29.5222	29.94	29.7373	29.6646	30.196	30.2869	30.1115	30.4823	30.1483	29.94
P54750	Calcium/calmodulin-dependent 3,5-cyclic nucleotide phosphodiesterase 1A	PDE1A	4	4	9.9	61.251	7.231			NaN	NaN	NaN	NaN	NaN	NaN	26.9088	26.965	26.518	27.0401	26.9203	26.417
P50990	T-complex protein 1 subunit theta	CCT8	39	39	75.7	59.62	218.39			34.3169	34.4519	34.3698	34.3892	34.3956	34.2897	33.4458	33.4083	33.3828	33.6415	33.4083	33.1989
P12814	Alpha-actinin-1	ACTN1	56	38	74.1	103.06	323.31			33.3033	33.8792	33.7252	33.0592	33.6944	33.5641	32.7474	32.8774	33.3169	33.1407	32.8157	33.0512
P06748	Nucleophosmin	NPM1	10	10	54.4	32.575	323.31			34.547	34.5296	34.3763	34.5527	34.4763	34.2828	34.0673	34.0512	34.1223	34.1753	33.933	34.1453
P15531	Nucleoside diphosphate kinase A	NME1	12	6	86.2	17.149	55.012			31.5296	31.2759	31.3828	31.7047	31.1724	31.2924	31.2979	31.0349	31.015	31.4433	31.0017	30.8974
Q6UWE0	E3 ubiquitin-protein ligase LRSAM1	LRSAM1	3	3	8.7	83.593	12.888			NaN	NaN	NaN	NaN	NaN	NaN	25.3135	NaN	NaN	NaN	25.3239	NaN
Q9Y285	Phenylalanine--tRNA ligase alpha subunit	FARSA	14	14	43.3	57.563	122.03			30.393	30.2077	30.2869	30.5573	30.362	30.3828	30.4919	30.4433	30.4134	30.4727	30.3515	30.5389
Q9NRX1	RNA-binding protein PNO1	PNO1	7	7	37.7	27.924	15.301			27.604	27.5609	27.4629	27.4314	27.5389	27.5754	28.0711	28.0296	28.0349	NaN	NaN	28.0557
Q9P035	Very-long-chain (3R)-3-hydroxyacyl-CoA dehydratase 3	HACD3	9	9	31.5	43.159	59.629			29.4727	29.0427	29.3787	29.3828	29.027	29.4214	28.7833	28.9539	29.0401	28.726	29.0864	28.9896
Q96QR8	Transcriptional activator protein Pur-beta	PURB	8	8	45.8	33.24	74.143			28.9484	29.1386	29.0401	29.0296	29.1288	28.8799	28.7864	28.6831	28.7676	28.6629	28.8945	28.7064
Q8IYS2	Uncharacterized protein KIAA2013	KIAA2013	7	7	18.3	69.156	74.415			27.9372	27.8385	27.9146	27.9203	27.7389	27.8504	27.7389	27.7895	27.965	27.9259	27.8445	27.7708
P05166	Propionyl-CoA carboxylase beta chain, mitochondrial	PCCB	10	10	31.2	58.215	131.8			27.141	27.141	27.0296	27.8019	27.4862	27.2891	27.9923	28.1556	27.2625	27.7895	28.0762	27.6931
Q66K74	Microtubule-associated protein 1S;MAP1S heavy chain;MAP1S light chain	MAP1S	23	23	38.5	112.21	91.513			29.4254	29.4433	29.5315	29.4113	29.4668	29.4473	29.8385	29.7849	29.8035	29.5862	29.7597	30.0737
P28838	Cytosol aminopeptidase	LAP3	23	23	54.9	56.166	241.56			31.8234	32.0447	32.0479	31.8042	32.0017	32.0479	32.1239	32.0544	31.7731	32.0832	32.0737	31.8422
Q9NQW7	Xaa-Pro aminopeptidase 1	XPNPEP1	26	26	59.9	69.917	275.53			32.5641	32.7088	32.5596	32.5844	32.7751	32.6285	32.5596	32.5618	32.5014	32.665	32.5319	32.4581
Q04724	Transducin-like enhancer protein 1	TLE1	5	2	9.7	83.2	9.3455			26.2463	NaN	26.0317	NaN	26.1984	NaN	26.6458	26.7517	26.7895	NaN	26.726	26.7645
Q9UNP9	Peptidyl-prolyl cis-trans isomerase E	PPIE	7	7	43.9	33.43	19.254			27.6527	27.4938	27.1507	27.3745	27.4073	27.4707	27.7129	27.7645	27.5754	NaN	27.8504	27.5315
O43776	Asparagine--tRNA ligase, cytoplasmic	NARS	18	18	38.5	62.942	314.12			30.8309	30.7129	30.8004	30.9045	30.7373	30.8234	30.5844	30.5203	30.4823	30.6285	30.5296	30.4727
P49427	Ubiquitin-conjugating enzyme E2 R1	CDC34	3	3	14	26.736	3.6933			26.6458	26.673	26.7771	26.3975	25.9803	26.5404	26.8385	NaN	26.1908	26.6998	26.604	26.3877
Q96RU3	Formin-binding protein 1	FNBP1	6	6	14.7	71.306	70.249			NaN	26.0711	26.1661	26.2714	26.067	26.1833	26.2481	26.9203	26.7129	26.6865	26.4583	26.8385
Q99653	Calcineurin B homologous protein 1	CHP1	8	8	39	22.456	17.443			28.55	28.3828	28.4746	28.4274	28.7325	28.6998	27.9428	28.0813	28.1747	28.3536	28.0243	27.8203
Q15435	Protein phosphatase 1 regulatory subunit 7	PPP1R7	10	10	34.4	41.564	36.747			NaN	NaN	NaN	27.2445	NaN	27.2535	28.6831	NaN	28.3324	NaN	28.203	28.8019
O95782	AP-2 complex subunit alpha-1	AP2A1	25	18	36.1	107.54	79.14			30.9609	30.8234	30.7771	30.7613	30.8004	30.8081	31.1604	31.2979	31.1901	31.3303	31.1842	31.1724
Q9P2J5	Leucine--tRNA ligase, cytoplasmic	LARS	47	47	49	134.46	295.63			32.0609	31.94	31.7731	32.1931	31.9081	31.7211	32.4823	32.3594	32.3542	32.5822	32.4007	32.2393
Q15785	Mitochondrial import receptor subunit TOM34	TOMM34	15	15	62.1	34.559	131.09			29.588	29.5128	29.459	29.8019	29.4214	29.5071	29.5333	29.3066	29.258	29.8065	28.94	29.2781
P31943	Heterogeneous nuclear ribonucleoprotein H;Heterogeneous nuclear ribonucleoprotein H, N-terminally processed	HNRNPH1	18	12	55.9	49.229	323.31			33.8883	33.8608	33.8234	34.0017	33.9591	33.8883	33.6944	33.5867	33.6088	33.2897	33.7453	33.8422
O60763	General vesicular transport factor p115	USO1	33	33	47.9	107.89	218.59			31.2422	31.4284	31.2135	31.362	31.3356	31.3724	32.0832	32.0641	31.7888	32.2675	32.025	31.6415
Q9C0D3	Protein zyg-11 homolog B	ZYG11B	5	5	9.3	83.92	84.426			25.5869	25.6757	NaN	NaN	NaN	NaN	26.141	26.4583	26.1234	26.4394	26.3795	25.9248
Q9H4A5	Golgi phosphoprotein 3-like	GOLPH3L	7	5	34.7	32.767	120.98			27.5315	27.4234	27.189	27.7833	27.509	27.5898	28.5826	28.4629	28.6146	28.6595	28.5682	28.4785
Q9NVA2	Septin-11	2020-09-11	15	9	49	49.398	318.16			31.4871	31.7771	31.6022	31.4134	31.6923	31.5481	30.9882	31.0927	31.1724	31.1664	30.8755	31.2422
Q9NYF8	Bcl-2-associated transcription factor 1	BCLAF1	18	17	24.2	106.12	215.29			30.6022	30.5203	30.5573	30.611	30.5844	30.4919	30.2193	29.8173	30.2077	30.0349	30.1483	30.1483
P05026	Sodium/potassium-transporting ATPase subunit beta-1	ATP1B1	11	11	42.9	35.061	27.133			30.5014	30.9609	31.0084	30.3303	30.7927	30.8385	30.1115	30.1604	30.0217	30.3088	30.1115	29.8974
Q14315	Filamin-C	FLNC	135	123	68	291.02	323.31			35.7252	36.0101	36.0308	35.6388	35.9483	35.9352	35.6918	35.7302	35.6171	35.8375	35.6496	35.6006
P62333	26S protease regulatory subunit 10B	PSMC6	20	20	62.5	44.172	72.945			32.0084	32.1544	32.1724	31.9916	32.1331	32.1664	31.4134	31.4134	31.4581	31.5978	31.2759	31.4483
Q13641	Trophoblast glycoprotein	TPBG	7	7	21.4	46.031	28.217			28.5315	29.1604	28.9456	28.2979	29.3971	28.6251	NaN	27.5969	28.0349	NaN	27.9088	27.7958
Q9Y4L1	Hypoxia up-regulated protein 1	HYOU1	45	44	54.9	111.33	323.31			32.9729	32.9347	32.8608	32.8719	32.9831	32.7672	32.94	32.9224	32.9882	33.1223	32.8441	32.9295
P20339	Ras-related protein Rab-5A	RAB5A	8	5	54	23.658	28.112			27.4862	27.217	27.2077	26.8741	27.2714	27.4394	27.9484	27.8858	27.5165	NaN	27.8142	27.8203
P17900	Ganglioside GM2 activator;Ganglioside GM2 activator isoform short	GM2A	4	4	29	20.838	4.1171			NaN	NaN	NaN	25.9316	NaN	NaN	26.4234	NaN	NaN	NaN	NaN	26.4425
Q86Y82	Syntaxin-12	STX12	5	5	28.3	31.642	181.14			28.3951	28.2353	28.3239	28.4668	28.4785	28.5826	28.1312	28.4234	28.217	28.5315	28.1361	28.141
O95674	Phosphatidate cytidylyltransferase 2	CDS2	4	4	16	51.417	19.049			NaN	NaN	26.0401	25.8834	NaN	26.0752	25.8997	NaN	25.6012	NaN	NaN	25.7796
P18077	60S ribosomal protein L35a	RPL35A	5	5	29.1	12.538	4.2763			29.5222	29.1937	29.7517	29.4862	NaN	NaN	NaN	NaN	29.4995	NaN	29.5203	NaN
Q9UKL0;Q9P2K3	REST corepressor 1;REST corepressor 3	RCOR1;RCOR3	7	7	21	53.327	30.068			28.0401	27.9146	28.17	28.2123	27.8799	28.0557	28.3494	27.9539	27.8445	28.4394	27.673	28.0505
Q53GQ0	Very-long-chain 3-oxoacyl-CoA reductase	HSD17B12	9	9	42	34.324	64.485			31.2979	30.7927	30.9045	31.3463	31.099	31.015	31.7573	31.9983	31.7453	32.0544	31.8571	31.6329
Q8WWY3	U4/U6 small nuclear ribonucleoprotein Prp31	PRPF31	8	8	30.1	55.455	60.021			28.2123	28.362	28.2979	28.3452	28.3951	28.4551	28.1842	28.203	28.2399	28.2891	28.0401	28.3494
Q9NUQ7	Ufm1-specific protease 2	UFSP2	9	9	35.4	53.261	19.713			27.7195	27.2077	27.7708	27.7325	27.4234	NaN	27.6663	27.9031	27.9088	NaN	27.9259	27.7708
P62166	Neuronal calcium sensor 1	NCS1	3	3	19.5	21.878	4.6365			NaN	NaN	NaN	NaN	NaN	NaN	26.452	26.4154	NaN	NaN	26.4551	NaN
Q9UNN5	FAS-associated factor 1	FAF1	5	5	11.2	73.953	34.997			26.8741	NaN	NaN	NaN	NaN	NaN	27.391	27.3578	27.0711	27.2262	27.4394	27.2353
O60885	Bromodomain-containing protein 4	BRD4	10	7	9.5	152.22	28.732			27.726	NaN	27.2625	27.3828	27.2262	27.2714	27.3324	27.6251	27.4394	NaN	27.5609	27.4154
P30519	Heme oxygenase 2	HMOX2	10	10	48.4	36.032	55.082			29.1386	29.1164	29.3536	29.0479	29.1312	29.1724	29.341	29.4433	29.55	29.509	29.4785	29.4174
Q08378	Golgin subfamily A member 3	GOLGA3	23	23	22.2	167.35	246.78			27.4234	28.0401	27.9814	27.3153	27.7064	27.632	27.7958	28.1842	27.5536	28.0965	28.0609	27.4154
P04406	Glyceraldehyde-3-phosphate dehydrogenase	GAPDH	18	18	75.2	36.053	323.31			36.7302	36.7428	36.8399	36.7428	36.8042	36.886	36.9086	36.9417	36.78	36.8399	36.9954	36.8631
Q15046	Lysine--tRNA ligase	KARS	24	24	47.9	68.047	230.54			32.4532	32.1574	31.933	32.3303	32.005	31.8042	32.0184	32.1177	32.0479	32.3436	31.9259	31.94
Q6KC79	Nipped-B-like protein	NIPBL	18	18	9.5	316.05	111.86			27.8916	27.8504	28.0296	28.1263	28.066	28.2759	28.003	28.0296	27.9977	27.6527	28.1507	28.2262
O00505	Importin subunit alpha-4	KPNA3	10	8	34	57.81	62.04			30.3088	30.196	29.94	30.2535	29.8667	29.9539	30.4032	30.6022	30.5573	30.7771	30.4823	30.341
O00232	26S proteasome non-ATPase regulatory subunit 12	PSMD12	23	23	48.2	52.904	170.43			31.2591	31.2535	31.2135	31.2019	31.2135	31.2591	31.4384	31.4184	31.3088	31.3463	31.4678	31.4184
Q15717	ELAV-like protein 1	ELAVL1	13	13	45.1	36.091	38.45			31.1664	31.1052	31.1052	31.196	31.099	31.08	30.995	30.9814	30.933	30.7927	31.1483	31.0217
P53680	AP-2 complex subunit sigma	AP2S1	3	3	20.4	17.018	4.609			NaN	NaN	26.1833	25.8433	NaN	NaN	26.8019	NaN	26.5754	NaN	NaN	26.7129
Q8NAV1	Pre-mRNA-splicing factor 38A	PRPF38A	6	6	22.8	37.476	13.302			27.4862	NaN	27.0401	27.4073	27.4785	NaN	27.0609	27.1984	27.217	27.3066	27.1604	27.0609
P49915	GMP synthase [glutamine-hydrolyzing]	GMPS	21	21	41.7	76.715	91.547			30.7211	30.362	30.4134	30.7849	30.362	30.3303	30.1239	30.1724	30.0217	30.2193	30.0217	30.1361
P78417	Glutathione S-transferase omega-1	GSTO1	18	18	61	27.566	74.448			31.4134	31.196	31.225	31.717	31.4234	31.4532	31.4629	31.2365	31.1422	31.1664	31.4234	31.325
Q9UPT5	Exocyst complex component 7	EXOC7	18	18	32.5	83.381	85.042			28.8829	28.9344	29.258	28.94	29.0557	29.1842	28.579	28.391	28.3828	NaN	28.49	28.4668
P68400;Q8NEV1	Casein kinase II subunit alpha;Casein kinase II subunit alpha 3	CSNK2A1;CSNK2A3	12	12	48.6	45.143	116.51			30.4532	30.3515	30.393	30.4032	30.4334	30.362	30.3088	30.1115	30.196	30.3515	30.2647	30.0609
Q93034	Cullin-5	CUL5	13	13	23.7	90.954	22.156			NaN	27.2535	NaN	27.1015	27.2077	27.189	28.0243	28.203	27.8019	28.141	27.7958	28.1604
P17987	T-complex protein 1 subunit alpha	TCP1	32	32	73	60.343	248.9			34.0184	34.099	33.9933	34.0592	33.9677	33.8792	33.02	32.8919	32.901	33.1857	32.881	32.7946
P55735	Protein SEC13 homolog	SEC13	13	13	59.9	35.54	225.58			31.7047	31.6798	31.5754	31.6198	31.8004	31.6458	32.4259	32.3463	32.2731	32.3956	32.4058	32.3223
Q9GZR7	ATP-dependent RNA helicase DDX24	DDX24	14	14	27.9	96.331	67.212			27.4785	27.0711	26.9428	26.9428	27.2714	26.9977	27.7064	27.0296	27.509	27.6389	27.4154	27.3324
Q9BT78	COP9 signalosome complex subunit 4	COPS4	21	21	68.2	46.268	104.94			30.5664	30.6881	30.6713	30.6022	30.6544	30.6798	30.8608	30.7613	30.7613	30.9539	30.7533	30.7453
Q96KP1	Exocyst complex component 2	EXOC2	12	12	19.9	104.07	19.461			27.8081	27.7771	27.8564	27.6798	27.8142	28.0243	27.611	27.5969	27.7064	NaN	27.611	27.7195
Q9Y5X3	Sorting nexin-5	SNX5	11	11	30.7	46.816	36.71			28.7739	28.9567	29.0813	28.6527	28.8564	28.9869	27.6931	26.7771	27.7195	NaN	NaN	27.4862
Q8WWC4	Uncharacterized protein C2orf47, mitochondrial	C2orf47	3	3	12	32.544	5.8135			NaN	NaN	NaN	26.4877	NaN	26.3444	26.7389	27.17	27.019	NaN	NaN	27.0084
P26885	Peptidyl-prolyl cis-trans isomerase FKBP2	FKBP2	7	7	53.5	15.649	22.984			29.326	29.3088	28.9732	28.9539	29.2625	29.2714	29.8726	29.8726	29.6981	30.099	29.7146	29.6881
Q8IYB5	Stromal membrane-associated protein 1	SMAP1	4	4	12.4	50.386	145.99			27.4154	27.2979	27.4785	27.2535	26.8504	27.0505	26.9203	27.3494	26.8741	NaN	27.0914	NaN
Q96RS6	NudC domain-containing protein 1	NUDCD1	16	16	35	66.755	94.08			29.6612	29.7613	29.57	29.8564	29.7786	29.6492	29.4649	29.4113	29.6781	NaN	29.3704	29.7113
Q9NSD9	Phenylalanine--tRNA ligase beta subunit	FARSB	25	25	47.7	66.115	122.36			30.8682	30.6798	30.8974	31.0927	30.8157	31.08	31.015	30.7373	30.7849	30.7613	30.94	30.933
P62081	40S ribosomal protein S7	RPS7	12	12	58.8	22.127	118.23			32.7373	32.6985	32.8119	32.5296	32.7191	32.4334	32.3006	32.3223	32.5085	32.2393	32.3115	32.6394
Q9NXF1	Testis-expressed sequence 10 protein	TEX10	10	10	17.5	105.67	30.831			27.1604	27.189	26.726	27.7325	27.2979	27.4234	28.3787	28.391	28.5203	28.391	28.524	28.4629
P36873	Serine/threonine-protein phosphatase PP1-gamma catalytic subunit	PPP1CC	18	4	63.8	36.983	75.398			29.2979	29.3217	29.3683	29.099	29.0762	29.1483	29.4073	29.3869	29.3536	29.6764	29.2913	29.2262
Q14320	Protein FAM50A	FAM50A	9	9	31	40.241	20.056			29.249	29.4785	29.4413	29.4492	29.3766	29.2422	28.6146	28.6663	28.3324	NaN	28.5352	28.611
P11172	Uridine 5-monophosphate synthase;Orotate phosphoribosyltransferase;Orotidine 5-phosphate decarboxylase	UMPS	11	11	34.8	52.221	67.726			29.2147	28.906	29.2193	29.0762	28.9787	29.2216	29.8593	29.7958	29.7389	29.7453	29.8755	29.8608
Q13574	Diacylglycerol kinase zeta	DGKZ	5	5	7.1	124.13	5.4423			25.9316	NaN	NaN	25.705	NaN	NaN	26.0995	NaN	25.7466	NaN	NaN	25.9628
P49917	DNA ligase 4	LIG4	8	8	14.1	103.97	18.411			25.6944	25.5983	26.4692	NaN	NaN	25.8191	26.3695	NaN	26.5624	NaN	NaN	26.4999
P80303	Nucleobindin-2;Nesfatin-1	NUCB2	13	13	36.9	50.222	71.501			29.393	29.5718	29.5718	29.6407	29.6848	29.3557	30.4334	30.393	30.2535	30.4629	30.4919	30.196
O15091	Mitochondrial ribonuclease P protein 3	KIAA0391	8	8	20.6	67.315	27.757			NaN	NaN	NaN	26.8623	NaN	NaN	27.1795	27.5463	NaN	27.3992	NaN	NaN
Q96DI7	U5 small nuclear ribonucleoprotein 40 kDa protein	SNRNP40	16	16	54.3	39.31	130.96			30.1483	29.8959	30.1483	30.2422	29.9677	30.2193	29.3153	29.4073	29.5296	29.1628	29.579	29.5754
P35637	RNA-binding protein FUS	FUS	15	13	24	53.425	185.28			33.1842	33.2897	33.2897	33.2193	33.1544	33.3436	33.0233	32.9814	33.015	32.6198	33.1604	33.2619
O94766	Galactosylgalactosylxylosylprotein 3-beta-glucuronosyltransferase 3	B3GAT3	7	7	34.3	37.121	34.668			28.267	28.4394	28.258	28.341	28.4473	28.4314	29.0889	28.9512	28.8019	28.8294	29.0737	29.0349
Q8IY67	Ribonucleoprotein PTB-binding 1	RAVER1	12	12	34.3	63.876	92.285			28.6964	28.6629	28.7739	28.9841	28.5646	28.6831	29.7146	29.7533	29.8309	29.8004	29.6646	29.9259
P62633	Cellular nucleic acid-binding protein	CNBP	6	6	42.9	19.463	146.42			29.537	29.5754	29.6285	29.7958	29.509	29.4113	28.7895	28.9977	29.2007	NaN	28.8945	29.1676
Q9Y5P6	Mannose-1-phosphate guanyltransferase beta	GMPPB	8	8	35.6	39.834	37.039			27.3578	27.2353	27.5014	27.1604	27.7833	27.6251	27.4073	27.17	NaN	27.4862	27.3662	27.0914
Q13620	Cullin-4B	CUL4B	19	12	26.3	103.98	59.828			28.3494	28.0084	28.003	28.3109	28.1556	28.3109	28.4512	28.8355	28.4512	28.7421	28.6075	28.5128
Q8TC12	Retinol dehydrogenase 11	RDH11	5	5	23.6	35.386	15.421			28.5862	28.2216	28.0243	28.5315	28.5352	28.0296	28.1937	28.3324	28.0711	28.4394	28.2935	27.9316
Q9NYB0	Telomeric repeat-binding factor 2-interacting protein 1	TERF2IP	7	7	31.1	44.259	25.047			28.3109	28.1015	28.066	28.49	28.0243	28.0401	27.9372	27.9031	27.8682	NaN	27.9814	27.8916
Q9UJU6	Drebrin-like protein	DBNL	15	15	45.1	48.207	224			30.5844	31.0927	30.8682	30.5933	30.8974	31.0283	31.2535	31.2308	31.1664	31.4775	31.2365	30.995
O75874	Isocitrate dehydrogenase [NADP] cytoplasmic	IDH1	18	17	47.6	46.659	54.632			30.3828	29.9677	30.0084	30.6198	30.2647	30.1361	31.4581	31.4581	31.2193	31.5799	31.3828	31.2703
Q9NPF4	Probable tRNA N6-adenosine threonylcarbamoyltransferase	OSGEP	8	8	38.8	36.426	83.999			27.4629	27.17	27.4629	27.4073	27.3153	27.5754	26.965	NaN	NaN	NaN	26.965	27.0296
Q14331	Protein FRG1	FRG1	3	3	15.9	29.172	7.0279			27.4785	27.4707	27.6931	27.6865	NaN	27.6798	27.6251	NaN	27.7453	27.4551	27.8916	27.7833
Q92544	Transmembrane 9 superfamily member 4	TM9SF4	8	8	17.1	74.518	100.46			29.326	29.0737	29.0164	29.362	29.2399	29.2759	29.8474	29.8445	29.4374	29.8294	29.9814	29.3992
Q86VP6	Cullin-associated NEDD8-dissociated protein 1	CAND1	52	49	50.2	136.37	323.31			32.8829	32.7109	32.7272	33.02	32.7272	32.8347	33.6944	33.8138	33.5978	33.8516	33.7353	33.6198
P62820	Ras-related protein Rab-1A	RAB1A	12	5	68.3	22.677	65.716			29.7309	29.673	29.5389	29.4032	29.5898	29.747	29.8974	30.1604	30.0084	30.0609	30.2193	29.8945
Q9P0L0	Vesicle-associated membrane protein-associated protein A	VAPA	10	10	62.2	27.893	41.333			29.2736	28.7421	29.0583	29.109	29.3023	29.1459	29.267	29.5444	29.4174	29.5014	29.4154	29.4254
Q96KA5	Cleft lip and palate transmembrane protein 1-like protein	CLPTM1L	7	7	23	62.228	50.298			29.099	29.0003	29.3023	28.8623	29.2781	29.2869	28.9622	29.3217	29.3787	29.2077	29.2957	29.2957
Q9BW61	DET1- and DDB1-associated protein 1	DDA1	2	2	29.4	11.835	4.8156			26.3578	NaN	26.4314	26.417	NaN	NaN	NaN	26.2732	25.8361	NaN	NaN	26.1055
Q07954	Prolow-density lipoprotein receptor-related protein 1;Low-density lipoprotein receptor-related protein 1 85 kDa subunit;Low-density lipoprotein receptor-related protein 1 515 kDa subunit;Low-density lipoprotein receptor-related protein 1 intracellular domain	LRP1	75	75	25.4	504.6	323.31			31.4871	31.7413	31.5389	31.7006	31.7047	31.7006	31.5156	31.2308	31.4727	31.3982	31.2647	31.6544
P48506	Glutamate--cysteine ligase catalytic subunit	GCLC	8	8	20.1	72.765	56.839			26.7389	26.9203	26.4938	27.0505	27.2077	26.965	28.6663	28.6697	28.0453	28.8445	28.4707	28.1795
Q86UL3	Glycerol-3-phosphate acyltransferase 4	AGPAT6	4	4	8.8	52.07	12.201			27.3324	27.341	27.4707	27.2445	27.3662	27.3239	26.433	26.965	27.0296	NaN	26.8264	26.9088
P63241;Q6IS14	Eukaryotic translation initiation factor 5A-1;Eukaryotic translation initiation factor 5A-1-like	EIF5A;EIF5AL1	17	17	88.3	16.832	323.31			33.7849	33.6944	33.6735	33.715	33.5754	33.4943	33.8883	33.9242	33.8234	34.0592	33.9063	33.7653
Q8ND30	Liprin-beta-2	PPFIBP2	6	4	12.3	98.543	24.177			NaN	NaN	NaN	NaN	NaN	NaN	26.2517	26.4614	26.527	NaN	NaN	26.4536
Q9Y4A5	Transformation/transcription domain-associated protein	TRRAP	16	16	6.7	437.6	70.251			27.0296	26.6458	26.5075	26.8504	26.6458	26.8623	27.2077	27.0711	27.3828	27.3239	27.3745	27.0711
P46108	Adapter molecule crk	CRK	11	11	51.3	33.83	95.126			29.6355	29.8829	29.9259	29.5862	29.843	29.8638	29.7988	29.8264	29.8264	30.0737	29.7502	29.6998
Q9NVM1	Protein eva-1 homolog B	EVA1B	4	4	55.8	18.373	174.12			NaN	27.0084	26.4583	26.7645	27.1795	26.5045	27.019	26.8019	27.3745	27.2077	27.3153	26.7771
P26196	Probable ATP-dependent RNA helicase DDX6	DDX6	21	21	58.2	54.416	227.53			30.8309	30.7613	30.8234	30.6713	30.6544	30.5664	30.9882	30.947	30.995	31.0927	30.9814	30.9609
Q9Y584	Mitochondrial import inner membrane translocase subunit Tim22	TIMM22	2	2	16	20.031	3.7735			NaN	NaN	NaN	NaN	NaN	NaN	NaN	NaN	26.3959	NaN	26.4314	NaN
Q8IWB7	WD repeat and FYVE domain-containing protein 1	WDFY1	7	7	22.7	46.323	14.49			27.5609	27.4473	27.611	27.4073	27.509	27.5165	28.2714	28.0557	28.1361	28.2123	28.4234	27.8974
P05023	Sodium/potassium-transporting ATPase subunit alpha-1	ATP1A1	34	21	39.1	112.89	323.31			32.3854	32.7068	32.5273	32.1269	32.3223	32.2619	31.7888	31.9153	31.8347	32.0705	31.8004	31.7573
Q9NRY5	Protein FAM114A2	FAM114A2	7	7	22.2	55.468	28.69			26.6865	26.8385	26.5624	26.9539	26.7771	26.632	27.0609	26.8264	26.8385	27.4073	26.673	26.6181
Q9HA38	Zinc finger matrin-type protein 3	ZMAT3	5	5	30.1	32.059	138.3			NaN	NaN	NaN	NaN	NaN	NaN	28.5573	28.5969	28.2445	NaN	28.6146	28.4032
Q13637	Ras-related protein Rab-32	RAB32	7	6	45.8	24.997	37.143			28.6146	28.2399	28.4274	28.2625	28.2714	28.189	27.6181	27.7517	27.8741	28.0084	27.7833	27.5389
P62304	Small nuclear ribonucleoprotein E	SNRPE	4	4	65.2	10.803	15.709			30.2869	30.1604	30.3303	NaN	30.0084	30.2979	29.9677	29.668	29.805	29.6146	29.94	29.9814
P19474	E3 ubiquitin-protein ligase TRIM21	TRIM21	3	3	10.7	54.169	3.4031			NaN	NaN	NaN	NaN	NaN	NaN	27.1214	26.8504	NaN	NaN	27.0711	26.9869
P40616	ADP-ribosylation factor-like protein 1	ARL1	10	10	73.5	20.417	126.8			28.906	29.0003	29.094	29.1337	29.17	29.0349	29.8355	29.788	29.7211	29.9259	29.8324	29.6981
P21399	Cytoplasmic aconitate hydratase	ACO1	18	18	34.8	98.398	43.473			28.9174	28.8264	28.9002	29.1795	29.1015	29.2193	28.7389	28.6355	28.2308	28.3324	28.8945	28.4823
Q9NS86	LanC-like protein 2	LANCL2	8	8	25.1	50.854	26.309			27.7958	27.9088	28.003	27.6798	NaN	28.0084	27.5536	NaN	27.8858	27.7895	27.6663	27.8385
P62899	60S ribosomal protein L31	RPL31	3	3	24.8	14.463	5.3592			31.3724	31.1115	31.4483	31.1783	31.2019	31.2703	30.6713	31.1664	31.0927	NaN	30.7771	31.2479
P48723	Heat shock 70 kDa protein 13	HSPA13	8	8	21	51.927	20.066			29.3515	29.461	29.5109	29.3745	29.6948	29.9814	28.7227	28.8682	29.4727	28.9539	28.9539	29.3473
Q9BW27	Nuclear pore complex protein Nup85	NUP85	11	11	25.5	75.019	23.574			27.9259	27.604	27.6527	27.6181	27.5682	27.5389	27.5463	27.611	27.509	NaN	27.632	27.5609
Q99829	Copine-1	CPNE1	16	16	30.7	59.058	68.792			31.1783	31.08	31.1115	31.4433	31.3828	31.2924	30.4919	30.4919	30.2535	30.4727	30.3303	30.5664
Q15459	Splicing factor 3A subunit 1	SF3A1	23	23	35.4	88.885	282.45			31.2535	31.1052	31.2703	31.2591	31.1052	31.1544	30.8829	30.8309	30.9746	30.9188	30.8974	30.995
P42025	Beta-centractin	ACTR1B	13	6	55.9	42.293	84.254			28.003	NaN	27.726	27.8916	27.9031	27.9372	28.4154	28.2123	28.3324	28.217	28.6181	28.2123
Q5TBB1	Ribonuclease H2 subunit B	RNASEH2B	3	3	14.4	35.138	5.8305			NaN	NaN	NaN	NaN	NaN	NaN	NaN	NaN	26.5682	NaN	26.604	NaN
Q06210	Glutamine--fructose-6-phosphate aminotransferase [isomerizing] 1	GFPT1	34	34	59.4	78.806	311.52			32.4134	32.5366	32.5226	32.4507	32.5527	32.4654	32.8347	32.8516	32.7888	33.1544	32.7633	32.6329
Q9H173	Nucleotide exchange factor SIL1	SIL1	8	8	26	52.084	18.295			26.6595	26.3153	26.1814	26.8264	26.1234	26.2944	28.1065	28.1507	27.7389	28.3662	28.1015	27.5826
Q9HAV4	Exportin-5	XPO5	21	21	23.8	136.31	54.634			28.5052	28.2077	28.391	28.4234	27.9372	28.3023	29.019	28.9316	28.7833	29.1937	28.9203	28.7227
O43823	A-kinase anchor protein 8	AKAP8	9	9	29	76.107	81.778			27.8858	27.7453	27.9259	27.9977	27.7833	28.1164	27.5682	27.6998	27.4473	27.965	NaN	27.1604
Q9Y262	Eukaryotic translation initiation factor 3 subunit L	EIF3L	26	26	49.8	66.726	323.31			31.2422	31.1783	31.0737	31.1483	31.0479	31.0414	31.1483	31.2077	31.0217	31.3463	31.196	30.94
Q86W92	Liprin-beta-1	PPFIBP1	14	12	20.1	114.02	63.503			27.0609	27.7958	27.611	27.0609	27.3992	27.189	27.7581	27.4314	27.7581	27.9595	27.6527	27.4394
O75223	Gamma-glutamylcyclotransferase	GGCT	6	6	46.3	21.007	6.4014			27.6998	27.5682	27.4862	27.673	NaN	27.4154	27.141	27.4473	27.2077	27.4551	27.2891	27.1984
P84098	60S ribosomal protein L19	RPL19	6	6	27	23.466	29.473			31.196	30.9677	31.2703	30.94	31.2019	31.0017	30.9117	31.2759	31.2924	31.2422	31.3356	31.0544
P28370	Probable global transcription activator SNF2L1	SMARCA1	28	15	25.4	122.6	25.897			27.3239	27.17	27.3066	27.189	27.2077	27.3992	26.5478	26.965	26.8264	26.6458	26.9088	26.9316
Q96GQ7	Probable ATP-dependent RNA helicase DDX27	DDX27	13	13	18.6	89.834	21.039			27.7708	27.7517	27.7895	27.965	28.203	28.0453	27.2714	NaN	27.4234	27.7895	27.1214	27.1795
O75935	Dynactin subunit 3	DCTN3	6	6	34.4	21.119	5.7711			27.2535	NaN	NaN	NaN	27.1214	NaN	NaN	NaN	27.0505	NaN	NaN	27.0914
Q9Y320	Thioredoxin-related transmembrane protein 2	TMX2	2	2	12.2	34.037	30.833			NaN	NaN	27.6527	27.7771	27.5754	27.7581	NaN	NaN	26.8623	NaN	26.6458	27.1312
Q9NX24	H/ACA ribonucleoprotein complex subunit 2	NHP2	6	6	68.6	17.201	43.038			28.9977	28.906	28.8112	28.9977	28.7486	28.8653	28.8945	28.8564	28.9002	28.7517	28.9031	29.109
Q8NE71	ATP-binding cassette sub-family F member 1	ABCF1	17	17	27.2	95.925	150.66			29.5259	29.1361	29.1507	29.21	29.189	28.9344	29.6595	29.7549	29.8504	30.0864	29.604	29.6663
P31483	Nucleolysin TIA-1 isoform p40	TIA1	10	7	41.7	42.963	54.734			29.5933	29.7786	29.94	29.8096	29.8726	30.0349	29.0813	29.1532	29.1866	29.0711	29.1239	29.3494
P61201	COP9 signalosome complex subunit 2	COPS2	14	14	47.9	51.596	72.941			29.7292	29.8653	29.8945	29.8309	29.8249	29.9259	29.5109	29.7373	29.6058	29.7031	29.7708	29.5128
Q9P2K5	Myelin expression factor 2	MYEF2	9	9	26.5	64.121	38.768			27.4234	27.1015	NaN	27.0609	27.341	26.9977	27.189	27.1604	27.2445	NaN	27.17	27.3066
Q8IUD2	ELKS/Rab6-interacting/CAST family member 1	ERC1	11	10	14.4	128.08	102.28			27.5165	27.3828	27.4314	27.3662	27.5315	27.4785	28.1263	28.1556	28.0505	28.4394	28.0864	27.8974
Q9H488	GDP-fucose protein O-fucosyltransferase 1	POFUT1	9	9	42	43.955	106.03			29.8974	29.8814	29.9117	29.8534	29.8653	29.9814	29.4492	29.341	29.1386	29.3088	29.2239	29.5352
P18858	DNA ligase 1	LIG1	16	16	25.9	101.73	43.101			28.066	27.8324	27.7771	28.3066	27.9428	28.1604	28.2935	27.9316	28.1263	28.3992	27.8799	28.1842
Q7L5D6	Golgi to ER traffic protein 4 homolog	GET4	9	9	35.2	36.504	15.529			27.141	27.5389	27.1604	27.4629	27.524	26.976	26.9539	26.9428	27.019	NaN	NaN	27.019
Q8N5L8	Ribonuclease P protein subunit p25-like protein	RPP25L	2	2	19.6	17.631	12.867			NaN	NaN	24.5345	NaN	NaN	NaN	25.3511	NaN	NaN	NaN	25.3578	25.4394
P54727	UV excision repair protein RAD23 homolog B	RAD23B	14	11	47.2	43.171	112.81			30.6964	30.8534	30.8829	30.7292	30.8755	30.8234	31.6022	31.6198	31.5343	31.6544	31.6372	31.6066
Q9UBQ5	Eukaryotic translation initiation factor 3 subunit K	EIF3K	9	9	49.1	25.059	14.631			29.4194	29.5844	29.4113	29.5844	29.461	29.5754	29.5627	29.4995	29.2647	29.4649	29.7195	29.2692
P30085	UMP-CMP kinase	CMPK1	12	12	55.6	22.222	41.009			30.196	30.1115	30.1483	30.5109	30.2647	30.1361	30.8157	30.8385	30.8004	30.8974	30.933	30.7692
Q96HS1	Serine/threonine-protein phosphatase PGAM5, mitochondrial	PGAM5	13	13	50.2	32.004	25.668			29.2602	29.099	29.2077	29.2602	28.9287	29.4234	29.7755	30.2869	29.7818	30.3303	30.0084	29.6372
O43396	Thioredoxin-like protein 1	TXNL1	14	14	54.7	32.251	241.13			31.2814	31.4775	31.5844	31.325	31.393	31.6066	30.362	30.362	30.6544	30.846	30.3515	30.2759
P55786	Puromycin-sensitive aminopeptidase	NPEPPS	38	38	52.8	103.28	225.11			31.933	32.0769	32.0217	31.9505	32.0927	32.1115	32.4108	32.4991	32.2924	32.6176	32.4408	32.2759
Q05639	Elongation factor 1-alpha 2	EEF1A2	20	7	62.6	50.47	17.261			28.3704	28.7031	28.5609	28.49	28.1842	28.3452	28.0349	NaN	28.189	NaN	28.1795	28.1459
O75909	Cyclin-K	CCNK	5	5	16.9	64.239	18.931			NaN	26.6865	NaN	26.8974	26.7517	26.6998	26.7129	26.6865	NaN	NaN	26.8142	26.6865
O75131	Copine-3	CPNE3	18	17	41	60.13	177.99			31.362	31.4134	31.7453	31.5754	31.341	31.6923	32.3196	32.375	32.3115	32.6066	32.3196	32.1931
P46778	60S ribosomal protein L21	RPL21	4	4	31.9	18.565	34.128			31.4083	31.2535	31.4967	31.1177	31.0544	31.4083	30.9814	31.2703	31.4433	31.1361	30.947	31.6881
Q14692	Ribosome biogenesis protein BMS1 homolog	BMS1	12	12	15.1	145.81	30.192			27.8916	27.8264	27.5463	28.0349	27.6798	27.6865	27.3239	27.6865	27.7771	27.3578	27.8324	27.7389
P82980	Retinol-binding protein 5	RBP5	4	4	37.8	15.931	7.8218			27.189	NaN	NaN	NaN	NaN	NaN	27.7389	NaN	26.604	NaN	27.4785	27.1604
Q9Y657	Spindlin-1	SPIN1	4	4	21.8	29.6	8.7002			NaN	NaN	NaN	NaN	NaN	NaN	NaN	NaN	27.7453	NaN	27.524	28.0137
O94906	Pre-mRNA-processing factor 6	PRPF6	24	24	29.4	106.92	102.4			30.0084	30.0217	30.0349	30.1361	29.9677	30.1483	28.9787	29.0839	29.0137	28.7031	29.158	29.3023
P55957	BH3-interacting domain death agonist;BH3-interacting domain death agonist p15;BH3-interacting domain death agonist p13;BH3-interacting domain death agonist p11	BID	3	3	28.7	21.994	22.81			27.8974	27.5463	27.673	28.019	27.7581	27.604	27.9203	28.0864	27.9869	28.2979	27.7389	28.0557
O75368	SH3 domain-binding glutamic acid-rich-like protein	SH3BGRL	10	10	85.1	12.774	33.914			29.094	29.0557	28.8445	29.3641	29.2825	29.1866	30.1483	30.2869	29.7597	29.6058	30.3515	30.3196
P48426	Phosphatidylinositol 5-phosphate 4-kinase type-2 alpha	PIP4K2A	6	4	12.8	46.224	20.782			26.6595	26.604	25.945	26.7771	26.3066	NaN	26.4661	26.5165	26.518	NaN	26.6595	26.4394
Q15124	Phosphoglucomutase-like protein 5	PGM5	26	26	56.1	62.224	250.28			31.0927	31.1842	31.2924	31.2019	31.3033	31.4919	33.4581	33.4823	33.0864	33.5412	33.4334	33.2193
Q15172	Serine/threonine-protein phosphatase 2A 56 kDa regulatory subunit alpha isoform	PPP2R5A	15	15	40.9	56.193	138.96			29.6544	29.2803	29.1556	29.9259	29.459	29.3346	29.6251	29.7565	29.3367	30.0349	29.5969	29.1312
Q12849	G-rich sequence factor 1	GRSF1	7	7	23.1	53.126	25.376			27.509	27.5682	27.5826	27.976	NaN	27.7708	27.4862	27.7453	27.8142	27.5969	27.8623	27.7453
Q9NTJ5	Phosphatidylinositide phosphatase SAC1	SACM1L	15	15	30.5	66.966	24.536			28.1065	27.4862	27.8916	28.0296	28.1312	28.2535	27.6998	27.9539	27.8858	27.8504	27.9923	27.8564
Q8TF05	Serine/threonine-protein phosphatase 4 regulatory subunit 1	PPP4R1	4	4	5.4	107	5.8769			NaN	NaN	25.2243	NaN	NaN	NaN	25.6568	NaN	24.9361	NaN	NaN	25.391
P46459	Vesicle-fusing ATPase	NSF	23	23	36.6	82.593	106.74			29.7437	29.8697	29.995	29.7895	29.8829	29.9814	30.0349	29.8474	29.8785	30.3088	29.8564	29.6831
P63172	Dynein light chain Tctex-type 1	DYNLT1	5	5	79.6	12.452	155.65			29.3828	29.5184	29.4881	29.5772	29.3557	29.4294	29.6372	29.6268	28.9896	29.5071	29.5315	29.459
Q06124	Tyrosine-protein phosphatase non-receptor type 11	PTPN11	20	20	47.2	68.436	43.487			29.708	29.5315	29.4314	29.6915	29.6303	29.4453	29.4274	29.4649	29.4765	29.5052	29.611	29.4012
P12277	Creatine kinase B-type	CKB	13	13	55.1	42.644	175.85			30.341	30.2759	30.5844	30.5389	30.5844	30.7373	30.8608	30.9117	30.2193	30.995	30.9259	30.2077
P60900	Proteasome subunit alpha type-6	PSMA6	13	13	68.7	27.399	88.484			31.5527	31.7211	31.7888	31.6756	31.8271	31.7211	31.8422	31.7731	31.7088	31.901	31.8645	31.7088
P20340;Q9NRW1	Ras-related protein Rab-6A;Ras-related protein Rab-6B	RAB6A;RAB6B	8	7	38.5	23.593	35.821			31.8347	32.0283	31.9916	31.8571	32.0576	32.0084	32.0769	32.2164	31.978	32.3776	32.0927	31.933
Q9H3P7	Golgi resident protein GCP60	ACBD3	17	17	56.6	60.593	277.17			30.4727	30.6629	30.6713	30.5754	30.611	30.5109	30.5389	30.4532	30.5296	30.6881	30.5933	30.3724
P49736	DNA replication licensing factor MCM2	MCM2	31	31	42.4	101.89	323.31			31.947	32.0184	32.1052	32.1084	32.08	32.1989	32.0832	32.1052	32.2647	32.2786	32.0895	32.245
P68032;P68133	Actin, alpha cardiac muscle 1;Actin, alpha skeletal muscle	ACTC1;ACTA1	23	0	70.6	42.019	164.05			34.4209	34.8746	35.0308	34.1679	34.9286	35.0308	35.1828	35.1566	35.9483	35.2157	35.2619	35.9827
P35658	Nuclear pore complex protein Nup214	NUP214	19	19	19.9	213.62	85.263			28.7581	28.7486	28.4032	28.2847	28.4394	28.3282	27.9203	28.4274	28.4668	NaN	28.3023	28.3869
Q3LXA3	Bifunctional ATP-dependent dihydroxyacetone kinase/FAD-AMP lyase (cyclizing);ATP-dependent dihydroxyacetone kinase;FAD-AMP lyase (cyclizing)	DAK	14	14	37.6	58.946	92.035			28.6663	28.7581	28.7129	29.1866	28.9814	28.7064	29.3745	29.4314	29.0084	29.5203	29.3109	29.1604
Q7L576	Cytoplasmic FMR1-interacting protein 1	CYFIP1	17	11	17.8	145.18	38.812			28.1984	28.3787	28.003	28.1842	27.8916	27.9259	28.8264	28.9146	28.877	28.8974	29.0813	28.7895
O75351	Vacuolar protein sorting-associated protein 4B	VPS4B	8	5	26.4	49.301	18.084			27.6931	27.509	27.7129	27.7645	27.4707	27.6998	27.5826	27.8019	27.8682	27.965	27.6931	27.7645
P50579	Methionine aminopeptidase 2	METAP2	17	17	56.3	52.891	323.31			30.2193	30.4919	30.5296	30.1604	30.4032	30.4134	29.8974	30.099	30.0609	30.2535	29.9814	29.9677
Q9NZB2	Constitutive coactivator of PPAR-gamma-like protein 1	FAM120A	24	24	36.5	121.89	109.19			28.8945	28.341	28.4551	28.9316	28.7739	28.6075	30.1361	30.0084	30.2759	30.3828	30.0349	30.1604
O14979	Heterogeneous nuclear ribonucleoprotein D-like	HNRNPDL	13	12	22.9	46.437	102.24			31.7006	31.6372	31.8422	31.7211	31.5062	31.9188	31.4919	31.6586	31.6242	31.6242	31.5435	31.7692
P20839	Inosine-5-monophosphate dehydrogenase 1	IMPDH1	14	14	37.5	55.405	55.864			29.6181	29.3578	29.141	29.5573	29.1819	28.9344	29.9539	29.8489	29.747	30.2308	29.7927	29.6268
Q8NBM4	Ubiquitin-associated domain-containing protein 2	UBAC2	4	4	20.3	38.963	10.448			25.5255	25.3645	NaN	25.8974	25.7645	25.317	26.5898	26.8741	26.965	27.1214	26.5898	26.8504
Q9H553	Alpha-1,3/1,6-mannosyltransferase ALG2	ALG2	6	6	26	47.091	11.676			NaN	NaN	NaN	NaN	NaN	NaN	27.5315	27.5898	27.4785	NaN	27.5826	27.5969
Q9P1U1	Actin-related protein 3B	ACTR3B	5	2	19.6	47.607	5.927			NaN	NaN	NaN	NaN	NaN	NaN	26.1214	26.1507	NaN	NaN	26.1908	NaN
P13797	Plastin-3	PLS3	28	25	48.7	70.81	193.71			31.7292	32.3276	32.2703	31.325	32.1146	32.1146	30.5109	30.4727	31.1361	30.7927	30.5296	31.0217
Q8IWX8	Calcium homeostasis endoplasmic reticulum protein	CHERP	15	15	28.6	103.7	115.45			30.196	30.3088	30.3724	30.2979	30.2308	30.3088	29.8173	29.8279	29.8355	29.9814	29.8385	29.8294
P30876	DNA-directed RNA polymerase II subunit RPB2	POLR2B	24	24	28.2	133.9	90.644			30.0084	29.7113	29.8945	30.0609	29.9117	29.995	29.4053	29.459	29.7549	29.6233	29.6595	29.5259
Q9BPX5	Actin-related protein 2/3 complex subunit 5-like protein	ARPC5L	5	5	53.6	16.941	63.169			28.4032	NaN	28.7708	NaN	NaN	NaN	30.196	30.0864	29.9814	30.3196	30.0864	30.0217
Q8IU81	Interferon regulatory factor 2-binding protein 1	IRF2BP1	16	16	50.9	61.687	56.855			29.141	29.267	29.1115	29.0864	29.2331	29.3828	28.066	28.189	28.3109	NaN	NaN	28.249
P61106	Ras-related protein Rab-14	RAB14	12	12	70.7	23.897	51.916			29.4093	29.6527	29.6337	29.5315	29.7723	29.7708	30.4234	30.5844	30.3828	30.8234	30.362	30.3303
Q9Y6Y8	SEC23-interacting protein	SEC23IP	17	17	25	111.08	82.593			29.7244	29.6022	29.8843	29.5682	29.6881	29.8682	29.5296	29.1189	29.4804	29.6216	29.3303	29.3662
O15144	Actin-related protein 2/3 complex subunit 2	ARPC2	22	22	76.3	34.333	64.527			30.3196	30.3828	30.4919	30.3515	30.341	30.3828	31.5109	31.5014	31.4433	31.6372	31.4284	31.5573
P63000	Ras-related C3 botulinum toxin substrate 1	RAC1	9	3	50	21.45	22.43			31.5343	31.8385	31.6964	31.5754	31.7888	31.5573	31.7533	31.8937	31.8385	32.025	31.8157	31.8157
P54619	5-AMP-activated protein kinase subunit gamma-1	PRKAG1	5	5	17.8	37.579	8.7039			27.1604	27.4551	NaN	NaN	NaN	27.6251	28.0762	28.0084	27.8264	28.1604	28.1115	27.7958
Q13616	Cullin-1	CUL1	20	20	35.6	89.677	94.797			29.995	29.9677	30.099	30.196	30.0737	30.1724	30.196	30.2193	30.2647	30.3303	30.1361	30.3724
Q08211	ATP-dependent RNA helicase A	DHX9	52	52	52.9	140.96	323.31			34.1679	34.0673	34.0673	34.2048	34.043	34.1679	34.0017	33.9933	34.0673	34.0673	34.0753	34.0911
Q9NVP1	ATP-dependent RNA helicase DDX18	DDX18	15	15	36.9	75.406	72.789			29.7309	29.4374	29.49	29.611	29.4012	29.5736	29.6424	29.8004	30.0084	29.9259	29.8579	29.8579
Q8IXT5	RNA-binding protein 12B	RBM12B	8	8	8.3	118.1	8.4762			27.4629	27.4234	27.8203	27.6527	27.3324	27.6931	27.1984	27.2535	27.3828	27.3992	27.3745	27.2353
P06756	Integrin alpha-V;Integrin alpha-V heavy chain;Integrin alpha-V light chain	ITGAV	20	20	26.2	116.04	126.83			28.8234	29.1239	28.9677	28.8741	29.104	29.0557	29.995	30.0217	29.8188	30.0609	29.9814	29.9814
Q9UPN3	Microtubule-actin cross-linking factor 1, isoforms 1/2/3/5	MACF1	128	126	25.5	838.3	323.31			32.0316	32.1392	32.1664	31.9643	32.0832	32.1021	32.0705	32.099	32.025	32.325	32.1021	31.9188
Q6P1K8;Q13888	General transcription factor IIH subunit 2-like protein;General transcription factor IIH subunit 2	GTF2H2C;GTF2H2	3	3	9.9	44.452	3.3615			25.9361	26.1214	NaN	25.895	NaN	26.0254	25.8927	25.8433	25.6676	NaN	NaN	25.8647
P48637	Glutathione synthetase	GSS	15	15	38.8	52.384	71.723			29.4727	29.6441	29.604	29.5463	29.6629	29.651	29.6981	29.6764	29.3578	29.8355	29.673	29.391
Q9NVH1	DnaJ homolog subfamily C member 11	DNAJC11	11	11	33.6	63.277	56.419			27.8916	27.5682	27.7895	28.0243	27.8916	27.6998	27.5754	28.0762	28.0557	NaN	27.7708	28.1652
O75347	Tubulin-specific chaperone A	TBCA	11	11	63.9	12.855	149.34			32.2619	31.8645	32.0117	32.005	31.9539	31.9365	31.901	32.0512	31.8755	31.94	31.9153	32.1453
P05534;P30447	HLA class I histocompatibility antigen, A-24 alpha chain;HLA class I histocompatibility antigen, A-23 alpha chain	HLA-A	15	4	48.5	40.688	323.31			29.1459	28.9316	28.7927	29.094	29.1556	28.673	30.9188	31.3776	30.0084	31.2308	31.1239	30.2535
P53041	Serine/threonine-protein phosphatase 5	PPP5C	18	18	45.1	56.878	257.16			31.1239	31.099	31.0349	31.0864	31.0737	31.0609	30.7849	30.9117	30.8608	31.0414	30.8385	30.846
Q9HC35	Echinoderm microtubule-associated protein-like 4	EML4	31	31	41.8	108.91	187.84			31.3724	31.3033	31.2814	31.2365	31.2135	31.3142	31.4775	31.4284	31.4727	31.6154	31.5014	31.4433
Q16531	DNA damage-binding protein 1	DDB1	35	35	39.6	126.97	293.28			32.8234	32.5664	32.6372	32.8664	32.648	32.6839	32.8403	32.9312	32.5956	32.8023	32.9117	32.8516
Q9BT73	Proteasome assembly chaperone 3	PSMG3	4	4	50	13.104	9.4672			NaN	NaN	NaN	NaN	NaN	NaN	28.0914	27.7771	27.673	NaN	27.9539	27.8858
P22392	Nucleoside diphosphate kinase B	NME2	12	2	75	17.298	107.26			34.6198	34.3763	34.5238	34.7099	34.3169	34.4763	34.3303	34.2478	34.1377	34.5179	34.2048	34.1529
Q9H0U4	Ras-related protein Rab-1B	RAB1B	13	6	70.6	22.171	172.46			32.3303	32.4581	32.555	32.4058	32.5754	32.5085	32.6777	32.8571	32.7868	32.9539	32.7946	32.7553
O60664	Perilipin-3	PLIN3	17	17	58.5	47.074	317.33			31.5889	31.7088	31.7652	31.5203	31.9224	31.8347	32.2563	32.1783	32.2308	32.4727	32.1604	32.1989
O95747	Serine/threonine-protein kinase OSR1	OXSR1	16	11	37	58.022	106.38			28.9088	28.7771	28.9002	29.1164	28.9174	28.9231	29.4492	29.4957	29.4134	29.651	29.4957	29.3848
Q9NSK0	Kinesin light chain 4	KLC4	9	5	22.5	68.639	67.222			NaN	NaN	NaN	26.0711	NaN	NaN	27.17	27.1507	26.9977	NaN	27.217	27.1214
Q92896	Golgi apparatus protein 1	GLG1	42	42	46.6	134.55	323.31			31.5664	31.8196	31.8792	32.1115	32.1753	32.1872	32.0479	32.0673	32.0184	31.9224	32.1483	32.2336
Q9BQ52	Zinc phosphodiesterase ELAC protein 2	ELAC2	24	24	46.5	92.218	87.912			29.9117	30.0349	30.1239	29.9814	29.9814	30.1115	29.9259	29.9117	30.0349	30.099	29.9677	29.995
P32321	Deoxycytidylate deaminase	DCTD	7	7	55.1	20.016	58.947			28.9259	28.9428	28.9896	28.976	29.1065	29.0349	29.4234	29.3324	29.3641	29.5987	29.3346	29.362
P21333	Filamin-A	FLNA	124	114	64.3	280.74	323.31			35.5613	36.0911	36.0491	35.3303	36.0552	35.9869	35.7824	35.9019	36.3118	36.097	35.8234	36.2828
P49792	E3 SUMO-protein ligase RanBP2	RANBP2	53	34	27.4	358.2	323.31			30.2077	30.2422	30.1239	30.3303	30.1115	30.0084	30.5389	30.4532	30.6713	30.7129	30.5296	30.611
Q8WYA6	Beta-catenin-like protein 1	CTNNBL1	9	9	17.9	65.173	29.586			27.7895	28.1065	27.9146	28.2077	27.976	28.2803	27.2535	27.5682	27.3745	NaN	27.3494	27.5826
P14618	Pyruvate kinase PKM	PKM	38	37	76.8	57.936	323.31			35.9086	36.0017	36.212	35.9153	36.0471	36.2845	35.1938	35.1029	35.0266	35.3203	35.2193	34.9591
Q9NP92	28S ribosomal protein S30, mitochondrial	MRPS30	6	6	24.8	50.364	17.154			NaN	NaN	NaN	27.2979	26.3662	NaN	26.7771	26.9869	27.3992	NaN	NaN	27.141
Q5RKV6	Exosome complex component MTR3	EXOSC6	4	4	21.7	28.235	27.904			28.4194	28.5536	28.49	28.4113	28.6561	28.3828	28.3452	28.3662	28.5536	28.3787	28.4551	28.6216
Q7KYR7	Butyrophilin subfamily 2 member A1	BTN2A1	4	4	8.7	59.632	4.0897			NaN	NaN	NaN	NaN	NaN	NaN	NaN	25.2317	25.6865	NaN	NaN	25.5404
P08237	ATP-dependent 6-phosphofructokinase, muscle type	PFKM	27	25	46.3	85.182	323.31			31.4334	31.2193	31.3724	31.4678	31.3303	31.5754	32.5956	32.5641	32.2897	32.7333	32.525	32.3828
P05386	60S acidic ribosomal protein P1	RPLP1	6	5	95.6	11.514	151.08			33.6522	33.7353	33.6198	33.5527	33.6522	33.5978	33.8608	33.8234	33.5527	33.9505	33.933	33.5179
Q8WUM0	Nuclear pore complex protein Nup133	NUP133	20	20	24.2	128.98	68.346			29.3536	29.1866	29.3001	29.4174	29.326	29.21	29.0375	29.1984	29.362	NaN	29.1483	29.3828
Q92973	Transportin-1	TNPO1	28	24	41.3	102.35	323.31			31.7373	31.8271	31.7129	31.6066	31.5844	31.5527	31.6798	31.7047	31.717	31.846	31.7849	31.6629
Q9BV38	WD repeat-containing protein 18	WDR18	6	6	23.1	47.405	18.548			27.2803	27.6458	NaN	27.7325	NaN	27.4862	27.7895	27.8142	28.0864	NaN	27.6595	28.2216
Q00535	Cyclin-dependent-like kinase 5	CDK5	11	10	48.6	33.304	40.935			28.9977	29.0505	29.1676	29.0864	28.9977	28.9896	28.7676	28.3153	28.9316	28.5826	28.7613	28.9146
Q14839	Chromodomain-helicase-DNA-binding protein 4	CHD4	60	45	41.7	218	323.31			31.8755	31.5203	31.8385	31.8974	31.6756	31.9259	31.6198	31.6415	31.7292	31.846	31.5978	31.7373
O14920	Inhibitor of nuclear factor kappa-B kinase subunit beta	IKBKB	21	20	37.8	86.563	53.144			28.5754	28.7389	28.3109	28.8415	28.632	28.6285	29.4727	29.537	29.3557	29.6764	29.5481	29.326
P42285	Superkiller viralicidic activity 2-like 2	SKIV2L2	19	19	26.2	117.8	43.991			29.8415	29.7833	29.8019	29.6527	29.6931	29.6764	29.5014	29.6646	29.5184	29.8188	29.5627	29.49
P57081	tRNA (guanine-N(7)-)-methyltransferase non-catalytic subunit WDR4	WDR4	3	3	14.8	45.489	15.694			26.673	26.6181	26.3477	26.512	NaN	26.5029	26.1984	NaN	26.1642	NaN	NaN	26.2481
O75396	Vesicle-trafficking protein SEC22b	SEC22B	8	8	39.1	24.593	158.6			30.2979	30.1604	30.2193	30.1724	30.3088	30.2647	30.0609	30.1115	30.099	30.3303	30.2077	29.9117
Q13596	Sorting nexin-1	SNX1	14	13	31.4	59.069	21.666			NaN	27.1795	28.8324	27.391	28.1214	29.3109	27.3828	27.6458	27.3239	NaN	NaN	27.524
Q5T447	E3 ubiquitin-protein ligase HECTD3	HECTD3	9	9	16.7	97.112	17.02			NaN	NaN	26.9869	NaN	NaN	26.9539	26.8264	26.7517	26.9428	26.7771	27.0914	26.8504
O00159	Unconventional myosin-Ic	MYO1C	28	28	37.4	121.68	184.21			30.3088	31.0084	31.015	30.099	30.7613	30.8682	30.7211	30.8081	30.8829	30.995	30.7047	30.9117
P55212	Caspase-6;Caspase-6 subunit p18;Caspase-6 subunit p11	CASP6	9	9	39.2	33.31	36.218			28.0453	27.6527	28.0965	28.0349	28.0084	28.0762	27.8799	27.6595	27.7195	27.8504	27.6458	27.965
Q92905	COP9 signalosome complex subunit 5	COPS5	13	13	45.8	37.578	38.874			29.203	29.3324	29.1842	29.4134	29.2979	29.3282	29.2957	29.2331	29.1556	29.4765	29.2193	29.1795
Q9HCS7	Pre-mRNA-splicing factor SYF1	XAB2	11	11	18.1	100.01	52.684			27.0296	26.9428	26.8974	26.8741	26.3256	26.9203	26.3975	26.3975	26.5225	NaN	NaN	26.509
O95104	Splicing factor, arginine/serine-rich 15	SCAF4	8	6	12.1	125.87	42.689			28.1459	28.17	28.4032	28.1015	28.217	28.1937	27.673	NaN	NaN	27.9088	NaN	27.5463
Q96KP4	Cytosolic non-specific dipeptidase	CNDP2	15	15	41.9	52.878	54.036			29.5259	29.389	29.4314	29.5916	29.3869	29.5259	30.3196	30.2422	30.1483	30.5573	30.2308	30.099
Q9UHG3	Prenylcysteine oxidase 1	PCYOX1	23	23	63.4	56.639	323.31			32.393	32.2478	32.3568	32.3724	32.5911	32.4943	32.6629	32.8719	32.5956	32.6923	32.8571	32.8004
O95292	Vesicle-associated membrane protein-associated protein B/C	VAPB	6	6	38.7	27.228	14.808			29.0965	28.9677	29.3515	28.9622	29.1795	29.5071	28.8829	29.0296	28.8142	29.0243	29.0531	28.8564
P51149	Ras-related protein Rab-7a	RAB7A	12	12	67.6	23.489	202.69			30.8081	30.8534	30.7927	30.8901	30.8829	30.7927	31.0864	31.225	31.0479	31.4032	31.2135	30.9188
O95490	Latrophilin-2	LPHN2	24	24	26.4	163.35	177.1			29.109	29.3431	29.3001	28.9705	29.4413	29.3494	29.5128	29.2736	29.4995	29.3787	29.5591	29.5627
Q9H4M9	EH domain-containing protein 1	EHD1	25	17	62.5	60.626	93.751			30.4919	30.8081	30.6544	30.4032	30.4334	30.6629	30.0864	30.1361	30.0217	30.2077	30.2077	30.0349
Q7Z6Z7	E3 ubiquitin-protein ligase HUWE1	HUWE1	50	50	19.4	481.89	323.31			30.3515	30.2979	30.2979	30.4629	30.4234	30.4629	30.2308	30.2193	30.196	30.1724	30.3515	30.341
P61978	Heterogeneous nuclear ribonucleoprotein K	HNRNPK	29	29	63.7	50.976	323.31			34.5922	34.5002	34.6787	34.7553	34.6088	34.7252	34.6892	34.5867	34.6361	34.715	34.6361	34.7702
Q99627	COP9 signalosome complex subunit 8	COPS8	5	5	42.6	23.225	85.868			29.1842	28.7096	29.3662	29.0003	28.7895	29.1652	28.9117	28.4746	28.4629	29.0762	28.5352	28.4073
Q9P1F3	Costars family protein ABRACL	ABRACL	4	4	66.7	9.0564	23.335			30.5664	30.362	30.8157	30.7533	30.6881	30.7927	29.5969	NaN	29.55	29.4707	29.4551	29.9539
Q15369	Transcription elongation factor B polypeptide 1	TCEB1	7	7	84.8	12.473	77.102			30.7849	30.8081	30.7771	30.6713	30.8901	30.6629	31.015	31.0673	31.0017	31.3088	30.9746	30.9882
P62826	GTP-binding nuclear protein Ran	RAN	13	13	49.1	24.423	209.82			33.9417	33.7553	33.715	34.0673	33.6944	33.9677	33.9242	33.5062	33.8138	33.9763	33.7653	33.7353
P50897	Palmitoyl-protein thioesterase 1	PPT1	6	6	33	34.193	51.564			30.5481	31.0017	31.2703	30.5203	30.9746	30.6372	30.8608	30.7927	31.1544	30.6198	30.7692	31.5014
Q13523	Serine/threonine-protein kinase PRP4 homolog	PRPF4B	10	10	10.4	116.99	22.029			27.5754	27.4938	27.4938	27.4394	27.5536	27.7517	28.1015	28.1604	27.9923	28.3992	27.9977	28.0453
P24534	Elongation factor 1-beta	EEF1B2	10	9	63.6	24.763	147.83			32.6	32.7353	32.6	32.4823	32.7252	32.5933	33.1392	33.2619	33.2478	33.4823	33.3169	33.0479
P12081	Histidine--tRNA ligase, cytoplasmic	HARS	22	16	51.7	57.41	311.33			31.5389	31.5062	31.393	31.5527	31.3879	31.3142	31.3356	31.4629	31.3515	31.5709	31.4032	31.3879
P14868	Aspartate--tRNA ligase, cytoplasmic	DARS	30	30	68.1	57.136	323.31			31.6415	31.5527	31.5978	31.7333	31.6501	31.7533	32.0895	31.8901	31.8901	32.1331	32.025	31.9259
P63096	Guanine nucleotide-binding protein G(i) subunit alpha-1	GNAI1	11	3	42.7	40.361	34.138			27.5969	27.9539	27.0609	27.1984	27.632	27.341	27.5536	27.6798	27.5826	27.509	27.6458	27.8623
O43175	D-3-phosphoglycerate dehydrogenase	PHGDH	21	21	45.4	56.65	164.07			32.3542	32.1989	32.1574	32.5504	32.2563	32.2222	30.8608	30.7129	31.325	31.0084	30.8234	31.3142
Q96S52	GPI transamidase component PIG-S	PIGS	6	6	15.7	61.655	25.438			27.8741	27.5389	27.6527	27.9814	27.8504	27.7771	27.632	28.0609	27.6181	27.7771	27.9203	27.8799
Q96AT9	Ribulose-phosphate 3-epimerase	RPE	5	5	38.6	24.927	25.657			27.9869	27.524	27.9146	27.6798	27.8385	27.9316	28.7581	28.632	28.6798	29.1628	28.49	28.5463
Q9Y230	RuvB-like 2	RUVBL2	22	22	49.9	51.156	124.07			31.5618	31.3879	31.2979	31.6964	31.4384	31.3828	31.3828	31.3568	31.3672	31.4483	31.3879	31.4919
O15355	Protein phosphatase 1G	PPM1G	16	16	46.5	59.271	316.36			30.9045	30.8534	30.8385	30.8974	30.6458	30.8004	30.5933	30.6544	30.6544	30.9609	30.5296	30.5933
Q15370	Transcription elongation factor B polypeptide 2	TCEB2	12	12	91.5	13.133	120.96			31.3515	31.2591	31.2193	31.3828	31.2759	31.2019	31.5844	31.5062	31.6022	31.9081	31.5664	31.393
P68036	Ubiquitin-conjugating enzyme E2 L3	UBE2L3	9	9	64.9	17.861	91.785			30.9746	30.7927	31.0737	31.1544	30.8608	31.0479	30.7927	30.9814	30.5754	31.099	30.7849	30.6964
Q9HCG8	Pre-mRNA-splicing factor CWC22 homolog	CWC22	5	5	7.8	105.47	11.742			25.6971	NaN	25.8764	25.8433	NaN	25.9847	26.1253	25.9517	26.1174	NaN	26.275	25.9977
O60502	Protein O-GlcNAcase	MGEA5	21	21	36.5	102.91	106.33			30.3196	30.3196	30.2869	30.3724	30.393	30.1842	30.5296	30.3724	30.5754	30.846	30.2647	30.5481
Q9UIA9	Exportin-7	XPO7	12	12	16.5	123.91	28.349			27.976	27.8974	27.673	27.8142	27.673	28.1312	28.141	28.3109	28.1164	28.4194	28.3153	28.0453
Q14318	Peptidyl-prolyl cis-trans isomerase FKBP8	FKBP8	7	7	24.5	44.561	14.554			28.6146	28.4473	28.3153	28.5165	28.6389	28.6764	28.5682	28.4354	28.6181	29.1628	27.8504	28.5536
Q96G03	Phosphoglucomutase-2	PGM2	19	19	34.8	68.283	78.29			29.7645	30.0349	30.1239	29.7629	30.0737	30.1361	30.5109	30.4134	30.341	30.4727	30.5664	30.4629
P05556	Integrin beta-1	ITGB1	16	16	30.1	88.414	79.1			30.5389	30.8901	30.6629	30.4532	30.846	30.7771	30.7771	30.9259	30.9539	30.9188	30.8081	31.1544
Q9H2H8	Peptidyl-prolyl cis-trans isomerase-like 3	PPIL3	4	4	31.1	18.154	60.457			NaN	NaN	NaN	NaN	NaN	NaN	27.4394	27.3066	27.3828	27.4707	27.5536	27.3324
Q9UHQ9	NADH-cytochrome b5 reductase 1	CYB5R1	15	15	64.3	34.094	71.406			31.1052	31.08	31.2308	31.0217	31.3463	31.3303	31.8157	31.6923	31.7533	31.5754	31.8385	32.0479
Q9BVC4	Target of rapamycin complex subunit LST8	MLST8	7	7	42.9	35.876	17.516			26.7129	NaN	NaN	26.4953	26.4769	26.3578	26.143	NaN	NaN	NaN	26.2151	26.2299
Q8NFH3	Nucleoporin Nup43	NUP43	9	9	38.4	42.15	84.22			28.1361	28.4274	28.4154	28.0762	28.0762	28.4707	27.5609	27.6663	27.604	NaN	NaN	27.6865
Q9HD33	39S ribosomal protein L47, mitochondrial	MRPL47	6	6	22	29.45	9.7093			27.17	NaN	26.9203	27.0505	NaN	26.5754	26.8019	27.0609	27.1984	26.8623	27.0401	27.3828
P15374	Ubiquitin carboxyl-terminal hydrolase isozyme L3	UCHL3	12	12	69.1	26.182	156.53			29.7613	29.7739	29.726	29.84	29.7244	29.7195	29.6798	29.7292	29.579	29.94	29.7597	29.4919
Q63HR2	Tensin-2	TNS2	12	11	19.9	152.58	43.224			27.4707	27.2077	27.5463	27.2077	26.976	26.9428	27.3745	27.2803	27.391	NaN	NaN	27.4314
Q9P0J0	NADH dehydrogenase [ubiquinone] 1 alpha subcomplex subunit 13	NDUFA13	6	6	53.5	16.698	12.022			28.9896	28.6492	28.9512	29.1239	28.8474	29.0137	28.7833	28.906	28.9344	NaN	28.6492	29.2123
Q92499	ATP-dependent RNA helicase DDX1	DDX1	33	33	52.7	82.431	323.31			32.325	32.2647	32.2786	32.362	32.3033	32.3698	31.9916	31.9746	31.9224	32.1052	32.0927	31.9259
P63027	Vesicle-associated membrane protein 2	VAMP2	4	2	60.3	12.663	80.638			28.9088	28.524	28.9088	28.7357	29.1312	28.9428	29.4053	29.5278	29.1984	29.4413	29.6458	29.2847
O95983	Methyl-CpG-binding domain protein 3	MBD3	6	6	24.4	32.844	18.993			28.0453	27.8504	28.3153	28.341	28.1604	28.1842	27.6998	27.8741	28.1164	28.1312	28.0401	27.7708
Q9NWV4	UPF0587 protein C1orf123	C1orf123	6	6	54.4	18.048	175.74			28.7771	28.6865	28.524	28.7325	28.7486	28.6798	29.2262	29.4957	29.158	29.2692	29.4842	29.389
P18206	Vinculin	VCL	59	59	59.5	123.8	323.31			34.1828	34.5867	34.6361	33.9677	34.5354	34.5238	33.8328	33.9417	34.1223	34.2265	33.8792	34.0349
Q96KQ7	Histone-lysine N-methyltransferase EHMT2	EHMT2	11	11	15.7	132.37	55.261			26.4536	NaN	NaN	26.2463	NaN	26.2445	26.6458	26.4154	26.6181	26.673	26.4041	26.8264
P61923	Coatomer subunit zeta-1	COPZ1	5	5	35	20.198	64.78			29.8249	30.0084	29.7565	29.9259	29.9539	30.099	30.1724	30.1239	30.1724	30.5014	30.4334	29.6372
P21964	Catechol O-methyltransferase	COMT	8	8	44.6	30.037	24.584			28.0349	27.7771	27.9203	27.7581	28.1164	27.7517	27.2353	27.7771	27.6458	NaN	27.4473	27.8324
Q6WCQ1	Myosin phosphatase Rho-interacting protein	MPRIP	25	25	36.3	116.53	147.39			28.9677	29.2957	29.4314	29.0243	29.3662	29.4571	29.4374	29.4314	29.7802	29.5664	29.5278	29.8142
Q8WW12	PEST proteolytic signal-containing nuclear protein	PCNP	5	5	31.5	18.925	70.133			28.3023	28.3828	28.1842	28.5933	28.267	28.3023	28.3745	27.9031	28.1937	NaN	28.0864	28.3992
P28288	ATP-binding cassette sub-family D member 3	ABCD3	13	13	25	75.475	41.191			28.6285	29.141	29.1771	28.5203	28.6831	29.1015	28.6998	28.8264	28.9539	28.9732	28.94	28.8234
P22626	Heterogeneous nuclear ribonucleoproteins A2/B1	HNRNPA2B1	24	24	68.8	37.429	323.31			34.8138	34.7603	34.7603	35.0753	34.8281	34.9153	34.5811	34.4083	34.5002	34.5584	34.5584	34.6253
Q8NI36	WD repeat-containing protein 36	WDR36	8	8	10.9	105.32	18.181			27.4154	27.2979	27.3494	27.524	27.189	27.5014	27.0401	27.2445	NaN	NaN	NaN	27.2262
Q9Y6M1	Insulin-like growth factor 2 mRNA-binding protein 2	IGF2BP2	21	20	40.4	66.121	323.31			32.4823	32.2591	31.9435	32.6	32.341	31.94	32.333	32.3515	32.325	32.3672	32.3802	32.5085
Q969T9	WW domain-binding protein 2	WBP2	7	7	32.6	28.087	13.574			27.1604	27.17	NaN	27.3992	27.1984	26.9539	NaN	27.0609	NaN	NaN	27.141	NaN
Q16181	Septin-7	2020-09-07	17	17	56.1	50.679	169.98			31.947	32.0832	32.1989	31.9848	32.1331	32.2135	31.7888	31.7333	31.8004	31.9117	31.7292	31.9259
Q13505	Metaxin-1	MTX1	6	6	19.3	51.462	12.475			27.8916	28.1312	27.7325	27.9539	27.5826	27.8916	27.4707	27.4862	27.673	NaN	27.4154	27.8142
Q9Y265	RuvB-like 1	RUVBL1	17	17	50.9	50.227	323.31			31.7965	31.5933	31.5014	31.9224	31.6923	31.5389	31.7613	31.6713	31.6798	31.9677	31.7088	31.6756
Q9BXY0	Protein MAK16 homolog	MAK16	5	5	20	35.368	13.105			27.0711	26.4892	NaN	26.8385	26.4877	26.7389	NaN	NaN	26.3511	NaN	26.4346	NaN
Q06546	GA-binding protein alpha chain	GABPA	10	10	34.1	51.295	67.047			28.8294	28.7864	28.6964	28.8355	28.8945	28.8294	28.6595	28.7129	28.7486	28.7486	28.5826	29.0084
P84103	Serine/arginine-rich splicing factor 3	SRSF3	6	5	29.3	19.329	21.249			31.1361	30.9814	30.7533	31.0609	30.94	31.015	30.8309	31.1361	30.995	31.325	31.0217	30.846
Q8WXF1	Paraspeckle component 1	PSPC1	13	13	31.4	58.743	122.42			29.5808	29.3971	29.6128	29.7146	29.4571	29.7739	30.1604	30.2308	30.2869	30.2647	30.2647	30.4032
P47756	F-actin-capping protein subunit beta	CAPZB	15	15	60.3	31.35	64.309			32.025	32.0544	32.0641	32.0316	32.0895	32.015	32.3115	32.3223	32.1901	32.5085	32.4159	32.13
Q16270	Insulin-like growth factor-binding protein 7	IGFBP7	6	6	35.1	29.13	13.42			26.9316	27.2625	26.8264	26.558	26.8142	26.9088	26.7389	26.7389	28.1842	NaN	NaN	27.4785
Q05682	Caldesmon	CALD1	36	36	32.9	93.23	323.31			34.0017	34.5062	34.5811	34.0349	34.5698	34.4943	34.0266	33.9933	34.4209	34.3236	33.9677	34.4083
Q9Y6W5	Wiskott-Aldrich syndrome protein family member 2	WASF2	4	4	13.9	54.283	26.574			26.2589	26.3101	NaN	NaN	NaN	NaN	27.0711	27.1795	NaN	NaN	27.2535	27.1604
O15260	Surfeit locus protein 4	SURF4	6	6	27.5	30.394	110.18			29.8489	29.5259	29.6964	29.4354	29.6216	29.8234	30.1239	30.5389	30.4823	30.5664	30.196	30.6372
P25774	Cathepsin S	CTSS	5	5	21.1	37.495	9.4568			NaN	NaN	NaN	NaN	NaN	NaN	27.8203	27.5536	27.2891	27.2625	27.7129	27.9146
Q96BR5	Cytochrome c oxidase assembly factor 7	COA7	4	4	29.9	25.709	22.161			29.1065	28.3869	28.5203	29.0557	28.2714	28.5052	28.8858	28.9539	28.7549	NaN	28.9787	28.9259
O75582	Ribosomal protein S6 kinase alpha-5	RPS6KA5	3	3	5.4	89.864	7.2943			NaN	NaN	NaN	NaN	NaN	25.772	26.0169	25.9539	NaN	NaN	26.1908	25.9428
Q01082	Spectrin beta chain, non-erythrocytic 1	SPTBN1	156	143	69.1	274.61	323.31			35.1068	35.3469	35.327	35.1262	35.3033	35.3236	35.8608	35.9041	35.886	36.097	35.9242	35.8815
Q9H0V9	VIP36-like protein	LMAN2L	5	5	21	39.71	10.025			27.217	27.4551	27.1115	27.019	27.189	27.3745	26.1174	26.726	NaN	NaN	NaN	26.5359
Q9NXU5	ADP-ribosylation factor-like protein 15	ARL15	3	3	19.1	22.876	5.518			NaN	NaN	NaN	NaN	NaN	NaN	28.066	28.203	NaN	28.3324	NaN	28.1065
Q9NYU2	UDP-glucose:glycoprotein glucosyltransferase 1	UGGT1	55	53	50.4	177.19	224.72			31.4581	31.5296	31.3982	31.4871	31.5754	31.4581	32.6372	32.6176	32.5435	32.8195	32.6415	32.5889
Q9BYD3	39S ribosomal protein L4, mitochondrial	MRPL4	8	8	51.8	34.919	61.324			28.4862	28.0609	27.9539	28.4668	28.2262	28.3282	28.2625	28.2847	28.7988	28.3992	28.5609	28.6998
Q8WZ82	Ovarian cancer-associated gene 2 protein	OVCA2	9	9	69.2	24.418	29.167			28.6355	28.7129	29.0583	28.1747	28.7645	28.8445	28.6389	28.066	28.2308	NaN	28.3196	28.5165
Q6GMV2	SET and MYND domain-containing protein 5	SMYD5	6	6	25.1	47.34	13.908			26.7517	NaN	26.7895	27.019	26.9316	NaN	26.6181	26.8264	26.8142	NaN	26.8741	26.8142
Q92604	Acyl-CoA:lysophosphatidylglycerol acyltransferase 1	LPGAT1	4	4	14.9	43.089	9.0131			27.17	NaN	NaN	27.189	27.1984	NaN	NaN	NaN	26.5898	NaN	NaN	26.6865
Q9H0D6	5-3 exoribonuclease 2	XRN2	18	18	30.5	108.58	78.565			28.9787	28.8324	28.9705	29.217	29.0914	29.1507	29.1676	29.0609	29.1239	29.0839	29.2692	29.258
Q16658	Fascin	FSCN1	13	13	34.3	54.529	127.14			31.4334	31.2019	31.1422	31.4334	31.1724	31.0084	31.0479	30.9188	30.8004	30.9814	31.0737	30.9882
Q13557	Calcium/calmodulin-dependent protein kinase type II subunit delta	CAMK2D	9	6	27.3	56.369	24.578			27.7833	27.5536	27.7453	27.604	27.7129	27.8142	27.4234	27.6931	NaN	27.8916	27.6527	27.3745
P31146	Coronin-1A	CORO1A	9	9	27.8	51.026	22.093			29.114	28.8415	28.8385	29.2602	28.7771	28.9117	26.4738	27.3662	27.391	27.4154	27.2891	26.9316
P12694	2-oxoisovalerate dehydrogenase subunit alpha, mitochondrial	BCKDHA	3	3	10.6	50.47	4.933			NaN	NaN	NaN	NaN	NaN	26.2996	26.2996	26.3545	26.2856	NaN	26.4024	NaN
Q9UBW7	Zinc finger MYM-type protein 2	ZMYM2	10	10	9.5	154.91	14.827			26.632	NaN	26.4154	26.7129	NaN	26.4815	27.0609	26.8623	26.9539	NaN	27.1604	26.9316
P41214	Eukaryotic translation initiation factor 2D	EIF2D	8	8	26.9	64.706	58.041			27.6527	27.4629	27.4314	27.5682	27.4938	27.5389	27.1312	26.7517	26.7771	27.0813	26.7517	27.1015
P25789	Proteasome subunit alpha type-4	PSMA4	9	9	51	29.483	130			31.4871	31.6629	31.6022	31.5889	31.5481	31.5844	31.6458	31.5664	31.3776	31.7129	31.7613	31.3672
Q6PJT7	Zinc finger CCCH domain-containing protein 14	ZC3H14	6	6	15.8	82.875	47.457			26.976	27.3066	27.1795	27.2535	27.217	27.3578	26.5754	26.6595	26.965	NaN	NaN	26.8385
Q96GG9	DCN1-like protein 1	DCUN1D1	8	8	35.5	30.124	147.38			29.8623	29.9677	29.8474	30.0349	29.8173	29.8504	30.1842	30.1842	29.9814	30.196	30.1604	30.2647
Q99996	A-kinase anchor protein 9	AKAP9	17	17	6	452.98	84.742			26.7645	27.019	26.965	26.965	26.9088	26.8623	26.9203	26.8741	26.7895	26.6595	27.1984	NaN
P25685	DnaJ homolog subfamily B member 1	DNAJB1	10	9	30.6	38.044	23.332			29.7014	29.6075	29.5033	29.6561	29.2891	29.389	29.1676	29.0609	29.0453	29.49	28.9923	29.0057
P19388	DNA-directed RNA polymerases I, II, and III subunit RPABC1	POLR2E	5	5	36.2	24.551	45.423			28.141	27.8916	28.1842	27.9595	27.965	28.203	27.9814	28.0813	27.7453	28.249	27.9031	27.9203
P62277	40S ribosomal protein S13	RPS13	10	10	48.3	17.222	56.288			32.1392	32.1544	32.2897	32.0283	32.2135	32.1753	32.0316	31.9188	32.2048	32.4991	31.5062	32.2619
Q06323	Proteasome activator complex subunit 1	PSME1	14	14	64.3	28.723	296.71			29.8019	29.8096	29.7958	30.1361	29.8081	29.8755	31.0737	31.1483	30.6629	31.3879	31.1544	30.5296
Q9Y5Q9	General transcription factor 3C polypeptide 3	GTF3C3	12	12	22.3	101.27	128.81			27.3239	27.2714	27.6251	27.2535	27.2077	27.4154	27.632	27.341	27.4234	27.509	27.3745	27.7708
Q03701	CCAAT/enhancer-binding protein zeta	CEBPZ	16	16	21.4	120.97	66.354			28.8741	28.5609	28.3494	28.5573	28.4629	28.5128	28.1065	28.019	28.362	28.0813	28.509	28.1604
Q9NPJ6	Mediator of RNA polymerase II transcription subunit 4	MED4	3	3	18.1	29.745	8.3537			25.8552	25.8552	25.9825	25.5255	25.8044	25.8647	NaN	25.7771	26.0401	25.3712	26.3612	26.1174
Q9NQ88	Fructose-2,6-bisphosphatase TIGAR	TIGAR	10	10	53.3	30.062	88.15			29.2557	29.3951	29.509	29.3131	29.4234	29.1652	30.6458	30.5014	30.5754	30.7692	30.7849	30.4134
O60573	Eukaryotic translation initiation factor 4E type 2	EIF4E2	5	5	33.9	28.362	17.428			27.2077	26.9088	27.2979	27.0401	26.9203	26.7129	27.2625	27.1115	26.9977	NaN	26.9869	27.4234
Q9ULK4	Mediator of RNA polymerase II transcription subunit 23	MED23	12	12	11.5	156.47	24.3			26.7517	26.4488	26.604	26.7389	26.2463	26.976	26.4441	26.8623	25.8385	26.7771	26.4969	26.2803
Q96GA7	Serine dehydratase-like	SDSL	4	4	18.2	34.674	6.1226			NaN	NaN	NaN	NaN	NaN	NaN	NaN	25.6676	NaN	NaN	NaN	25.7568
P35241	Radixin	RDX	31	17	53.7	68.563	77.393			29.8188	30.099	30.0737	29.7549	30.0479	29.995	30.1115	30.1604	30.2535	30.3724	30.2979	30.1239
Q14103	Heterogeneous nuclear ribonucleoprotein D0	HNRNPD	18	17	43.1	38.434	323.31			33.4943	33.4702	33.5412	33.5179	33.6307	33.6307	33.5062	33.6088	33.4209	33.3033	33.7751	33.6944
Q9H0S4	Probable ATP-dependent RNA helicase DDX47	DDX47	7	7	23.5	50.646	182.01			27.632	27.611	27.4862	27.4473	27.3578	27.4551	27.217	27.6458	27.3745	27.8504	27.4314	27.1795
P14649	Myosin light chain 6B	MYL6B	5	3	32.7	22.764	5.4655			NaN	NaN	25.2058	25.1795	NaN	NaN	NaN	26.1035	26.0338	NaN	26.2803	26.0296
Q13867	Bleomycin hydrolase	BLMH	11	11	34.7	52.562	35.299			28.8653	28.6146	28.3745	28.9787	28.7453	28.2847	29.1866	29.2869	29.1015	29.4274	29.2285	29.1913
Q05519	Serine/arginine-rich splicing factor 11	SRSF11	5	5	15.3	53.542	7.1331			27.3745	27.7129	27.9814	27.5609	NaN	27.632	NaN	27.5463	NaN	NaN	27.7389	27.524
P27635	60S ribosomal protein L10	RPL10	10	10	46.7	24.604	118.28			32.1146	32.0316	32.1813	32.0641	31.9848	31.9609	32.0447	32.1084	32.2814	32.1453	32.4532	32.1021
P46109	Crk-like protein	CRKL	9	9	46.9	33.777	35.748			27.9146	27.9146	27.7958	28.0557	27.8741	27.7325	28.1556	28.003	28.1747	28.4823	28.066	28.019
P11766	Alcohol dehydrogenase class-3	ADH5	12	12	50	39.724	165.04			32.1724	32.0673	32.0447	32.1842	32.2222	32.1634	32.6819	32.555	32.4919	32.6608	32.6242	32.7292
Q14919	Dr1-associated corepressor	DRAP1	5	5	28.3	22.35	9.4486			27.0914	27.3992	27.2077	27.0505	27.3239	27.2803	26.9203	27.3239	26.9316	27.2535	27.2445	26.976
O75695	Protein XRP2	RP2	4	4	11.7	39.641	5.1809			NaN	NaN	NaN	25.2426	NaN	NaN	25.6375	NaN	NaN	NaN	NaN	25.7338
P36543	V-type proton ATPase subunit E 1	ATP6V1E1	7	7	30.5	26.145	36.235			27.8858	28.9539	27.976	27.7064	28.0609	28.2803	28.0137	27.8564	28.4746	28.49	28.2759	27.8623
P84085	ADP-ribosylation factor 5	ARF5	11	7	80	20.529	52.966			31.9677	32.1392	32.1084	32.0117	31.9712	31.9814	32.4847	32.5014	32.3879	32.8042	32.4678	32.3515
P34896	Serine hydroxymethyltransferase, cytosolic	SHMT1	9	8	31.3	53.082	50.248			28.0349	27.9203	28.0609	27.9705	28.0401	28.2123	27.5315	27.7958	27.6527	27.9088	27.8019	27.5463
Q5VW32	BRO1 domain-containing protein BROX	BROX	8	8	33.3	46.476	35.548			29.632	29.8549	29.9117	29.9117	29.9539	30.0609	29.5591	29.5627	29.55	29.4413	29.8294	29.6595
Q8TDN6	Ribosome biogenesis protein BRX1 homolog	BRIX1	11	11	51.3	41.401	50.672			30.0349	29.6251	29.7178	29.8945	29.7517	29.3724	29.249	29.6964	29.995	29.5772	29.8593	29.8726
O43290	U4/U6.U5 tri-snRNP-associated protein 1	SART1	14	14	24.4	90.254	90.939			28.9705	28.8385	28.8385	28.9622	28.8504	28.9002	28.1795	28.2759	28.4274	NaN	28.2216	28.5426
P19623	Spermidine synthase	SRM	14	14	65.6	33.824	82.918			29.8127	29.604	29.55	29.7692	29.4823	29.2781	28.9539	28.5573	28.8858	28.7676	28.9539	28.9814
Q15125	3-beta-hydroxysteroid-Delta(8),Delta(7)-isomerase	EBP	2	2	11.3	26.352	9.5846			29.9539	28.8474	29.0111	29.7517	29.1842	29.5389	29.5951	29.8858	NaN	NaN	NaN	29.843
P36915	Guanine nucleotide-binding protein-like 1	GNL1	9	9	19.3	68.66	23.974			28.1015	28.066	27.8445	28.0557	27.726	27.5609	28.8682	28.6697	29.1628	29.203	28.9344	28.8711
P28906	Hematopoietic progenitor cell antigen CD34	CD34	5	5	17.4	40.716	114.37			32.1842	32.0316	31.5014	32.3672	31.8385	31.6798	32.9028	32.6923	32.7252	32.9171	32.8328	32.8664
P40938	Replication factor C subunit 3	RFC3	14	14	54.8	40.556	55.526			29.341	29.1866	29.2147	29.3971	29.1507	29.3828	29.4374	29.3828	29.5203	29.673	29.5772	29.3641
Q9BRT9	DNA replication complex GINS protein SLD5;DNA replication complex GINS protein SLD5, N-terminally processed	GINS4	6	6	35.9	26.047	16.864			28.1507	27.9977	28.1312	28.362	28.0349	28.203	27.8385	27.5682	28.019	27.9814	27.7645	27.9923
P25445	Tumor necrosis factor receptor superfamily member 6	FAS	7	7	29.9	37.732	139.98			27.6865	27.9428	27.7581	27.5463	27.976	27.7833	28.2891	28.4194	28.5646	28.5898	28.4274	28.55
P22314	Ubiquitin-like modifier-activating enzyme 1	UBA1	42	42	57.7	117.85	323.31			33.9153	33.9417	33.8608	33.9933	34.0753	33.9763	34.1975	34.1901	34.13	34.3436	34.2759	34.1828
O95139	NADH dehydrogenase [ubiquinone] 1 beta subcomplex subunit 6	NDUFB6	3	3	29.7	15.489	5.4539			NaN	26.9539	27.1015	NaN	26.7129	27.141	27.1015	27.5165	27.2077	27.4154	27.2445	27.4785
O96000	NADH dehydrogenase [ubiquinone] 1 beta subcomplex subunit 10	NDUFB10	6	6	48.3	20.776	10.361			28.3153	28.2891	28.5352	28.6492	28.4862	28.7129	28.4668	28.6216	28.5315	28.5389	28.7292	NaN
Q9H0P0	Cytosolic 5-nucleotidase 3A	NT5C3A	8	8	29.2	37.948	27.847			28.8142	29.2535	29.4649	28.805	29.17	29.3766	27.6931	27.7958	27.7771	27.8916	27.7129	27.9428
P23443	Ribosomal protein S6 kinase beta-1	RPS6KB1	3	3	7.6	59.139	6.115			NaN	NaN	26.317	26.8264	26.2553	26.4614	26.9088	NaN	26.7517	NaN	NaN	26.9316
O75718	Cartilage-associated protein	CRTAP	17	17	50.6	46.561	47.081			31.3356	31.2703	31.1115	31.1842	31.3672	31.015	31.5481	31.5527	31.3672	31.6501	31.6586	31.4483
P14866	Heterogeneous nuclear ribonucleoprotein L	HNRNPL	23	22	66.4	64.132	323.31			33.6415	33.4823	33.4943	33.7252	33.5527	33.6629	33.5179	33.2759	33.4943	33.6307	33.3303	33.6198
P62318	Small nuclear ribonucleoprotein Sm D3	SNRPD3	5	5	53.2	13.916	211.66			31.1604	31.1664	31.2647	31.3088	31.4032	31.2077	31.1177	31.015	31.1115	30.8608	31.325	31.3033
O75477	Erlin-1	ERLIN1	9	7	32.9	38.925	25.651			28.509	28.2803	28.3951	28.4154	28.6285	28.5536	28.4154	28.509	28.8385	28.7771	28.5862	28.7195
P49720	Proteasome subunit beta type-3	PSMB3	9	9	48.8	22.949	26.054			30.2193	30.1724	30.2869	30.2869	30.3515	30.5754	30.6458	30.2869	30.362	30.5754	30.5664	30.4727
P13861	cAMP-dependent protein kinase type II-alpha regulatory subunit	PRKAR2A	9	7	30	45.518	35.159			27.9316	27.8916	27.9259	28.0505	28.0914	28.0965	28.459	28.6663	28.4194	28.611	28.7676	28.4551
Q96HC4	PDZ and LIM domain protein 5	PDLIM5	16	16	37.4	63.944	176.93			29.0479	29.5664	29.4214	28.5014	29.2602	29.0296	28.4234	28.6629	29.3787	NaN	NaN	28.9787
Q96GM8	Target of EGR1 protein 1	TOE1	10	10	32	56.547	76.354			28.7064	28.5389	28.4354	28.5426	28.3828	28.3745	28.5609	28.632	28.7833	28.7833	28.7771	28.7162
O75340	Programmed cell death protein 6	PDCD6	9	9	62.8	21.868	89.539			29.4453	29.1483	29.0427	29.5184	29.3704	29.1724	29.9539	29.9117	29.7629	29.94	30.0349	29.9539
O94804	Serine/threonine-protein kinase 10	STK10	8	7	12.7	112.13	49.665			26.8741	26.9869	26.8858	26.7389	26.6595	26.7771	NaN	NaN	26.5419	NaN	NaN	26.6458
O60749	Sorting nexin-2	SNX2	13	12	28.1	58.47	70.229			29.7064	29.6475	29.6337	29.7517	29.7565	29.7437	29.3196	29.1312	29.4804	29.4976	29.4571	29.2825
O75400	Pre-mRNA-processing factor 40 homolog A	PRPF40A	13	13	15.4	108.8	27.177			28.7613	28.632	28.6998	28.8504	28.9841	28.7645	28.8682	29.0111	28.9923	29.1937	28.9146	29.0531
O96011	Peroxisomal membrane protein 11B	PEX11B	6	6	26.6	28.431	8.2256			NaN	NaN	26.0148	NaN	NaN	NaN	26.9428	27.2445	NaN	27.1312	27.0609	27.391
Q6UN15	Pre-mRNA 3-end-processing factor FIP1	FIP1L1	11	11	32.3	66.526	105.1			28.6181	28.579	28.8355	28.7096	28.7421	28.9146	28.4629	28.5052	28.7581	28.6146	28.6998	28.726
Q9Y4G6	Talin-2	TLN2	39	31	26.4	271.61	127.32			29.3766	29.17	29.3662	29.0375	29.5646	29.6128	25.275	NaN	26.3712	NaN	26.0422	26.0041
P39023	60S ribosomal protein L3	RPL3	18	18	44.2	46.108	92.18			32.9983	32.859	33.0134	32.8829	32.8937	32.7068	32.8042	32.9063	33.0332	33.13	32.8195	33.0832
O75643	U5 small nuclear ribonucleoprotein 200 kDa helicase	SNRNP200	81	81	50.7	244.5	323.31			32.6242	32.5458	32.5933	32.5618	32.5343	32.6458	32.1901	32.2308	32.2869	32.4581	32.2279	32.3115
P16435	NADPH--cytochrome P450 reductase	POR	14	14	25.4	76.689	95.731			30.2759	29.7113	30.0217	30.1483	29.9117	29.9677	30.2422	30.2647	30.1842	30.5481	30.2759	30.1483
Q14690	Protein RRP5 homolog	PDCD11	34	34	25.1	208.7	149.36			29.7096	29.4765	29.7178	29.5555	29.6458	29.6372	29.391	29.5278	29.6163	29.3452	29.6128	29.843
Q92575	UBX domain-containing protein 4	UBXN4	4	4	14.6	56.777	125.43			28.2077	28.1115	28.3828	28.1747	28.0243	28.1604	29.3196	29.249	29.1652	29.5389	29.3431	29.1288
Q9NUD5	Zinc finger CCHC domain-containing protein 3	ZCCHC3	6	6	17.1	43.547	6.0991			26.1371	25.7441	25.8834	25.767	25.8927	25.8167	25.341	25.9517	25.8576	NaN	25.7103	25.9628
P78330	Phosphoserine phosphatase	PSPH	8	8	52.9	25.007	38.601			28.906	28.6697	29.094	28.8504	28.805	29.066	29.2602	29.0914	29.2239	29.5203	28.995	29.3196
P78347	General transcription factor II-I	GTF2I	42	42	49.2	112.42	319.13			31.933	31.7771	31.9609	31.8792	31.7494	32.0084	31.6154	31.4134	31.4678	31.7613	31.5799	31.4483
Q9NZT2	Opioid growth factor receptor	OGFR	12	12	27.2	73.324	173.41			29.0889	29.2602	29.1288	29.2602	29.1628	29.1483	28.258	28.1747	28.3109	28.5315	28.3662	28.1263
Q9Y3B2	Exosome complex component CSL4	EXOSC1	5	5	35.9	21.452	11.057			27.6181	27.4473	27.3992	27.4862	27.4551	27.3494	NaN	27.189	27.217	NaN	NaN	27.3066
Q8IXI2	Mitochondrial Rho GTPase 1	RHOT1	8	7	15.2	70.783	10.653			NaN	NaN	NaN	NaN	NaN	NaN	26.7895	26.9869	27.019	26.8623	27.0711	27.1604
P54802	Alpha-N-acetylglucosaminidase;Alpha-N-acetylglucosaminidase 82 kDa form;Alpha-N-acetylglucosaminidase 77 kDa form	NAGLU	9	9	17.9	82.265	11.682			25.7796	NaN	NaN	NaN	NaN	NaN	27.2077	26.9088	26.4738	26.9539	27.189	26.8385
P00568	Adenylate kinase isoenzyme 1	AK1	9	9	57.2	21.635	197.22			29.249	29.5826	29.7864	29.604	29.7211	29.7325	30.5203	30.3828	30.3196	30.4433	30.4823	30.6022
O43852	Calumenin	CALU	25	25	74	37.106	323.31			33.5867	33.7553	33.5062	33.6944	33.8883	33.5754	34.2897	34.3169	34.3892	34.4642	34.3763	34.4642
Q4G148	Glucoside xylosyltransferase 1	GXYLT1	2	2	4.5	50.566	3.8876			26.9088	27.1015	26.48	26.2696	26.6181	26.5315	26.275	26.5285	26.6458	26.9428	26.346	26.425
O14787	Transportin-2	TNPO2	7	3	10.7	101.39	4.3597			26.6595	26.4551	NaN	26.9203	NaN	NaN	27.2445	NaN	26.9316	NaN	27.3992	26.965
P62910	60S ribosomal protein L32	RPL32	5	5	34.1	15.86	17.435			31.6501	31.5389	31.6501	31.5978	31.6964	31.4334	31.4532	31.611	31.5573	31.6329	31.6022	31.7006
Q9Y4W2	Ribosomal biogenesis protein LAS1L	LAS1L	15	15	35.1	83.064	67.541			28.0243	28.0557	28.1164	28.0965	27.965	27.9259	28.2262	28.1015	28.1214	27.8623	28.3239	28.5052
P62258	14-3-3 protein epsilon	YWHAE	25	23	85.5	29.174	323.31			35.043	35.1107	35.0673	35.2229	35.1679	35.1415	35.2549	35.2584	35.1223	35.5091	35.3763	35.0225
P38919	Eukaryotic initiation factor 4A-III;Eukaryotic initiation factor 4A-III, N-terminally processed	EIF4A3	26	23	72.7	46.871	67.726			31.3196	31.0927	31.4083	31.3033	31.1544	31.2869	31.015	30.8755	30.9609	30.8829	31.0349	31.2308
Q9GZL7	Ribosome biogenesis protein WDR12	WDR12	11	11	38.8	47.707	46.064			29.0375	28.9677	28.7739	29.0505	29.0003	28.8534	28.8264	28.7357	28.7708	29.0711	28.9231	28.6181
Q9NVM9	Protein asunder homolog	ASUN	6	6	13.2	80.224	9.4728			26.8623	26.8019	26.7771	27.1015	26.8504	26.8858	26.8385	NaN	26.5754	NaN	NaN	26.8142
P62140	Serine/threonine-protein phosphatase PP1-beta catalytic subunit	PPP1CB	19	7	68.8	37.186	31.567			29.632	29.6146	29.8489	29.588	29.7517	29.5315	29.6964	29.7389	29.5184	29.9117	29.6268	29.7195
P15559	NAD(P)H dehydrogenase [quinone] 1	NQO1	13	13	44.9	30.867	69.08			31.2924	30.9539	30.9882	31.5618	30.995	31.099	31.6154	31.6154	31.5156	31.933	31.5481	31.5481
P20042	Eukaryotic translation initiation factor 2 subunit 2	EIF2S2	22	22	67.3	38.388	323.31			31.2647	30.995	30.9746	31.1361	30.9117	30.8755	30.5573	30.995	30.947	31.08	30.846	30.9188
O14980	Exportin-1	XPO1	39	39	45.4	123.38	270.95			31.8682	31.6501	31.4919	31.846	31.611	31.6544	31.9643	32.0447	31.9224	32.1453	32.1021	31.9983
Q14498	RNA-binding protein 39	RBM39	16	16	40.6	59.379	254.38			30.3303	30.362	30.393	30.4919	30.4032	30.3515	30.0609	29.8755	29.9539	30.196	30.0864	29.9117
P25786	Proteasome subunit alpha type-1	PSMA1	15	15	71.5	29.555	169.64			31.4433	31.4967	31.4629	31.4433	31.5978	31.4727	31.7888	31.7652	31.4823	31.9643	31.781	31.6022
Q6P2Q9	Pre-mRNA-processing-splicing factor 8	PRPF8	79	79	45.4	273.6	323.31			32.4991	32.3223	32.3698	32.4184	32.2222	32.5179	32.0609	32.1544	32.2478	32.2422	32.2675	32.2786
O15400	Syntaxin-7	STX7	7	7	40.2	29.815	62.461			29.0737	28.7895	28.5014	28.9512	28.9595	28.7031	28.7613	28.9869	29.0164	29.099	28.9287	29.0634
P56182	Ribosomal RNA processing protein 1 homolog A	RRP1	4	4	11.3	52.839	71.561			27.4314	27.1214	27.391	27.4862	27.3578	27.2979	NaN	NaN	26.8019	NaN	26.8504	26.9539
Q16576	Histone-binding protein RBBP7	RBBP7	17	12	68.2	47.82	146.65			31.7494	31.6501	31.7888	31.8347	31.9081	31.8309	31.4678	31.4775	31.5203	31.7888	31.4284	31.5389
Q96T23	Remodeling and spacing factor 1	RSF1	23	23	23.1	163.82	323.31			29.2308	29.2007	29.1842	29.2535	29.0737	29.2602	29.0965	29.1795	29.1263	29.0609	29.3452	29.3023
Q9Y6D9	Mitotic spindle assembly checkpoint protein MAD1	MAD1L1	4	4	8.8	83.066	6.2999			NaN	NaN	NaN	NaN	NaN	NaN	NaN	NaN	26.6595	NaN	NaN	26.7645
P54136	Arginine--tRNA ligase, cytoplasmic	RARS	33	33	57	75.378	323.31			32.4309	32.3356	32.2814	32.4334	32.3905	32.2507	32.3515	32.3515	32.196	32.6329	32.393	32.1664
Q96JM3	Chromosome alignment-maintaining phosphoprotein 1	CHAMP1	6	6	9.7	89.098	12.171			26.7129	26.5667	26.8019	27.0401	26.8974	27.1507	26.8974	27.3153	27.4785	27.2445	27.2445	27.5609
P61421	V-type proton ATPase subunit d 1	ATP6V0D1	10	10	39.9	40.329	46.933			29.4274	29.4214	29.3971	29.2331	29.4234	29.4394	30.2759	30.362	30.1115	30.5014	30.4234	30.1483
Q6ZVM7	TOM1-like protein 2	TOM1L2	6	6	25	55.556	16.365			NaN	NaN	NaN	NaN	NaN	NaN	27.1507	NaN	NaN	NaN	27.3662	27.141
Q9H7Z7	Prostaglandin E synthase 2;Prostaglandin E synthase 2 truncated form	PTGES2	10	10	42.4	41.943	52.762			27.7645	27.5682	27.6458	27.7581	27.3324	27.5682	28.7581	28.4394	28.5609	28.6075	28.604	28.877
Q96P16	Regulation of nuclear pre-mRNA domain-containing protein 1A	RPRD1A	9	7	42	35.719	52.167			27.1015	27.3662	27.2353	27.4938	27.726	27.4551	26.8142	26.7389	26.7645	NaN	26.8019	26.9539
Q14676	Mediator of DNA damage checkpoint protein 1	MDC1	17	17	17.6	226.66	279.56			28.203	27.4394	27.5682	27.8974	27.8264	27.4551	28.1263	28.217	28.341	28.2891	28.1795	28.5352
P32322	Pyrroline-5-carboxylate reductase 1, mitochondrial	PYCR1	11	10	42.6	33.36	176.95			29.5071	29.0479	29.0889	29.7178	29.1288	28.8504	30.7047	30.947	30.7211	30.7849	30.995	30.933
Q86VW0	SEC14 domain and spectrin repeat-containing protein 1	SESTD1	5	5	12.5	79.347	28.721			NaN	26.1661	26.533	25.9111	26.3844	26.1965	26.6458	26.4877	26.8264	27.1015	26.673	26.4614
P30050	60S ribosomal protein L12	RPL12	8	8	58.8	17.818	185.35			32.8974	32.8176	32.8309	32.8403	32.8081	32.7771	33.1346	33.1709	32.9591	33.2336	33.2193	33.1453
Q9UKM7	Endoplasmic reticulum mannosyl-oligosaccharide 1,2-alpha-mannosidase	MAN1B1	5	5	11.3	79.579	11.976			26.0105	26.527	26.2996	26.1194	26.5433	26.632	26.3101	26.4234	26.4008	NaN	26.2996	26.6595
P17252	Protein kinase C alpha type	PRKCA	15	15	35.9	76.749	54.778			27.4629	29.5718	29.4354	25.6348	29.2147	29.2869	25.9738	26.0854	24.7846	NaN	25.3811	26.1757
P61764	Syntaxin-binding protein 1	STXBP1	4	4	9.4	67.568	5.8165			NaN	NaN	NaN	NaN	NaN	NaN	26.726	26.8019	NaN	27.141	26.574	26.8504
P51148	Ras-related protein Rab-5C	RAB5C	9	6	60.6	23.482	34.005			30.7771	30.7533	30.7047	30.5573	30.5481	30.8755	30.7613	30.94	30.6198	31.015	30.9677	30.6713
O75607	Nucleoplasmin-3	NPM3	6	6	60.1	19.343	286.77			29.9117	29.8234	29.668	29.7692	29.7325	29.8901	29.6578	29.6146	29.747	NaN	29.8445	29.7244
Q9BXB5	Oxysterol-binding protein-related protein 10	OSBPL10	7	6	11.4	83.969	26.244			27.2353	27.8142	27.604	26.9316	27.5463	27.3662	27.3745	27.391	27.6251	27.5898	27.3828	27.7453
P13010	X-ray repair cross-complementing protein 5	XRCC5	41	41	70.2	82.704	323.31			33.1709	33.0689	33.1068	33.2336	33.099	33.1438	33.2336	33.1724	33.1798	33.3698	33.2164	33.3303
Q9Y240	C-type lectin domain family 11 member A	CLEC11A	4	4	15.2	35.694	5.8948			NaN	NaN	NaN	NaN	NaN	NaN	27.509	NaN	NaN	NaN	NaN	27.6181
P52701	DNA mismatch repair protein Msh6	MSH6	41	41	41.9	152.78	217.09			31.6242	31.4581	31.525	31.7888	31.5435	31.6415	31.2869	31.0927	31.341	31.4384	31.1842	31.4334
P62306	Small nuclear ribonucleoprotein F	SNRPF	4	4	48.8	9.7251	38.725			29.7613	29.5591	29.7162	29.6948	29.6915	29.537	29.5109	29.2913	29.4804	29.5969	29.5052	29.5222
Q93009	Ubiquitin carboxyl-terminal hydrolase 7	USP7	31	31	38	128.3	207.3			30.6798	30.611	30.7533	30.7211	30.5933	30.7292	30.8234	30.8004	30.6881	30.8081	30.8755	30.9539
Q9BTT0	Acidic leucine-rich nuclear phosphoprotein 32 family member E	ANP32E	7	7	34.7	30.692	79.548			29.5184	29.196	29.3848	29.6915	29.5052	29.6268	30.2193	30.3515	30.1724	30.0737	30.5389	30.4334
O76071	Probable cytosolic iron-sulfur protein assembly protein CIAO1	CIAO1	4	4	13	37.84	20.564			NaN	27.3494	27.1015	27.4473	NaN	27.1507	27.141	NaN	27.2625	27.4551	27.2077	27.2535
P12236	ADP/ATP translocase 3;ADP/ATP translocase 3, N-terminally processed	SLC25A6	17	4	55.4	32.866	161			33.2478	33.2336	33.2759	33.2897	33.1407	33.2336	33.2619	33.3033	33.2897	33.1223	33.5179	33.5179
O60506	Heterogeneous nuclear ribonucleoprotein Q	SYNCRIP	29	24	55.7	69.602	323.31			33.9677	33.8974	33.9591	33.9505	33.933	33.9591	33.3436	33.4458	33.3568	33.5412	33.4334	33.5062
P52294	Importin subunit alpha-5;Importin subunit alpha-5, N-terminally processed	KPNA1	12	5	26.4	60.221	12.922			27.3066	27.3992	NaN	27.0813	27.2625	NaN	27.1984	27.0609	27.2535	27.4073	27.1507	NaN
P16070	CD44 antigen	CD44	5	5	9.7	81.537	63.193			28.6075	29.8339	29.1386	28.1459	29.461	28.9841	27.3662	NaN	NaN	27.3745	26.976	27.9316
Q16851	UTP--glucose-1-phosphate uridylyltransferase	UGP2	21	21	52.6	56.94	260.68			31.1604	31.3828	31.3303	31.2422	31.325	31.3142	31.3463	31.3356	31.3088	31.6329	31.2703	31.4083
Q9BWM7	Sideroflexin-3	SFXN3	8	7	37.4	35.503	30.372			27.673	NaN	26.6595	NaN	NaN	NaN	28.1115	28.8415	28.6492	28.3023	28.6998	28.9567
Q14192	Four and a half LIM domains protein 2	FHL2	19	19	77.8	32.193	178.98			32.6756	32.8992	32.7868	32.7533	33.0848	32.8271	33.3828	33.3956	33.6944	33.3568	33.6088	33.8234
P42677	40S ribosomal protein S27	RPS27	5	3	41.7	9.461	12.452			30.846	30.8974	30.8974	30.8234	30.8004	30.6964	30.5109	30.5389	30.4433	30.7373	30.5389	30.5389
Q13547	Histone deacetylase 1	HDAC1	15	11	49.6	55.102	135.56			30.9117	30.7211	30.8901	31.015	30.8974	30.94	31.08	30.8234	30.846	31.1483	31.0349	30.9259
P63220	40S ribosomal protein S21	RPS21	7	7	65.1	9.1113	166.14			31.2535	31.0737	31.1901	31.1842	31.0544	31.0927	31.196	31.0927	31.1604	31.5156	31.0673	31.1783
Q53GS9	U4/U6.U5 tri-snRNP-associated protein 2	USP39	14	14	35.9	65.38	81.919			29.995	29.9259	29.9814	29.94	29.9259	30.1239	29.509	29.7517	29.5916	29.5808	29.8264	29.7864
Q9Y2T2	AP-3 complex subunit mu-1	AP3M1	14	12	47.6	46.939	76.506			29.0084	28.8564	28.7292	28.7389	28.9174	28.965	29.1866	29.0505	29.109	29.5481	29.109	28.9705
Q96G23	Ceramide synthase 2	CERS2	3	3	7.1	44.876	8.0689			NaN	NaN	27.1795	NaN	27.17	NaN	27.4862	28.3536	28.2847	NaN	28.2979	28.1115
Q09161	Nuclear cap-binding protein subunit 1	NCBP1	14	14	25.4	91.838	90.002			29.17	29.2376	29.2123	29.3431	29.1015	29.2077	29.7129	29.7565	29.632	29.94	29.9117	29.5627
Q9BVA1	Tubulin beta-2B chain	TUBB2B	27	1	78.7	49.953	44.323			32.7712	33.0958	33.2897	32.859	33.3303	33.4458	33.3436	33.2478	33.5062	NaN	33.0414	33.8234
Q96CS3	FAS-associated factor 2	FAF2	18	18	67.6	52.623	114.65			30.2647	30.099	30.0479	30.0609	30.1842	29.94	30.5389	30.7292	30.7373	31.0479	30.6458	30.611
Q15057	Arf-GAP with coiled-coil, ANK repeat and PH domain-containing protein 2	ACAP2	7	7	13.8	88.028	12.411			NaN	NaN	25.8811	25.7466	25.654	NaN	26.0359	25.9225	25.9998	26.2696	25.9933	26.0359
Q8NFF5	FAD synthase;Molybdenum cofactor biosynthesis protein-like region;FAD synthase region	FLAD1	6	6	17.5	65.265	44.82			27.0084	26.9316	26.8019	27.217	27.0401	26.9088	26.5029	27.1214	26.515	NaN	26.6595	27.0296
P46926	Glucosamine-6-phosphate isomerase 1	GNPDA1	13	8	68.2	32.668	180.96			31.2869	31.0737	30.8081	31.362	31.13	30.846	31.0609	30.7771	30.7373	31.1422	31.0084	30.7613
Q05086	Ubiquitin-protein ligase E3A	UBE3A	14	14	25.1	100.69	38.829			28.4354	28.3153	28.1937	28.3828	28.1164	28.0864	27.4234	27.141	27.604	NaN	27.9595	26.8741
Q86UE4	Protein LYRIC	MTDH	20	20	46.7	63.836	229.43			30.5664	30.2193	30.7533	30.7047	30.6713	30.7292	30.7533	30.5573	30.9882	31.0864	30.6964	30.8755
Q9BXV9	Uncharacterized protein C14orf142	C14orf142	3	3	67	10.859	61.946			27.5389	27.8324	27.632	27.6181	27.7453	27.5315	27.3066	27.1984	27.1115	27.6527	27.2891	26.9539
P26572	Alpha-1,3-mannosyl-glycoprotein 2-beta-N-acetylglucosaminyltransferase	MGAT1	4	4	11.5	50.878	5.7912			NaN	NaN	26.3811	NaN	26.1661	26.2838	25.8881	NaN	26.2353	NaN	NaN	26.1908
Q9BSH4	Translational activator of cytochrome c oxidase 1	TACO1	8	8	51.2	32.477	165.88			29.6544	29.6181	29.7292	29.6915	29.8974	29.94	29.3869	29.6646	29.7692	29.6058	29.7244	29.8638
Q13158	FAS-associated death domain protein	FADD	4	4	31.7	23.279	105.16			28.9814	28.8799	28.7421	28.217	28.5203	28.5315	28.2399	28.3494	28.1556	NaN	28.8974	27.5315
Q969M3	Protein YIPF5	YIPF5	2	2	8.2	27.989	7.3422			26.1253	NaN	NaN	NaN	26.3894	NaN	NaN	26.1965	26.4425	NaN	NaN	26.4441
P36405	ADP-ribosylation factor-like protein 3	ARL3	8	8	64.3	20.455	80.204			29.341	29.1459	29.258	29.189	28.7895	29.0686	29.3282	29.2891	28.8945	29.4134	29.2803	29.2054
O75165	DnaJ homolog subfamily C member 13	DNAJC13	17	17	11	254.41	66.442			27.7129	27.5754	27.4938	27.4473	27.5609	27.6798	27.9705	28.0084	27.7389	28.4194	27.9484	27.611
Q9Y6X3	MAU2 chromatid cohesion factor homolog	MAU2	7	7	21.9	69.081	72.622			27.3066	27.217	27.0609	27.5014	27.1795	27.5969	27.2535	27.3066	27.3324	27.0813	27.604	27.524
P26368	Splicing factor U2AF 65 kDa subunit	U2AF2	11	11	35.6	53.5	63.181			31.6671	31.5618	31.6329	31.7211	31.6022	31.7373	31.2193	31.3828	31.4678	31.3828	31.5573	31.4967
Q99543	DnaJ homolog subfamily C member 2;DnaJ homolog subfamily C member 2, N-terminally processed	DNAJC2	9	9	20.8	71.996	72.495			28.4473	28.0914	28.1507	27.8264	28.0762	28.1214	27.6998	NaN	27.9088	28.141	27.632	27.9595
Q99685	Monoglyceride lipase	MGLL	8	8	35.3	33.261	23.428			28.5536	28.3662	28.6075	28.6831	28.5278	28.4938	27.5315	27.391	27.6798	NaN	NaN	27.6595
Q14202	Zinc finger MYM-type protein 3	ZMYM3	6	6	7.4	152.38	35.114			NaN	26.1115	26.3545	26.2481	26.1115	26.4362	NaN	NaN	26.3187	NaN	26.4409	NaN
Q04760	Lactoylglutathione lyase	GLO1	12	12	81.5	20.777	36.684			31.7333	31.4433	31.1604	31.8755	31.4581	31.3515	31.901	31.9259	31.7888	31.9677	32.1084	31.901
P14324	Farnesyl pyrophosphate synthase	FDPS	9	9	24.3	48.275	35.82			30.4823	29.8264	29.5987	31.0609	30.3196	29.8858	30.393	30.5109	30.1361	30.8385	30.4234	30.0737
Q7Z2T5	TRMT1-like protein	TRMT1L	8	8	23.2	81.746	29.712			27.3494	27.5754	27.4862	27.7645	27.6527	27.9814	27.1115	26.9316	27.019	NaN	27.524	26.632
Q9BWS9	Chitinase domain-containing protein 1	CHID1	10	10	35.1	44.94	22.617			27.0711	NaN	NaN	27.8081	27.3066	NaN	29.2422	29.158	29.3346	29.3766	28.8415	29.7502
P53618	Coatomer subunit beta	COPB1	38	38	49.4	107.14	310.84			32.2365	32.2365	32.1664	32.0641	32.225	32.2336	32.5618	32.5596	32.6285	32.8883	32.686	32.5203
O75663	TIP41-like protein	TIPRL	9	9	44.1	31.444	18.955			29.4354	29.4093	29.3452	29.3494	29.3324	29.3282	29.3001	29.1771	29.2825	29.611	29.3971	29.0737
Q9H8H0	Nucleolar protein 11	NOL11	8	8	20.2	81.123	23.642			28.49	28.6181	28.3578	28.6898	28.2625	28.3023	28.2353	28.2077	28.1015	28.2262	28.2714	28.4113
P30086	Phosphatidylethanolamine-binding protein 1;Hippocampal cholinergic neurostimulating peptide	PEBP1	13	13	81.3	21.057	159.91			33.5062	33.5412	33.4334	33.5978	33.6307	33.5179	34.043	33.8792	33.6307	33.8422	34.1223	33.9677
Q9UEY8	Gamma-adducin	ADD3	20	20	40.7	79.154	102.92			29.2007	29.3807	28.8504	29.1288	29.3662	29.0813	30.6629	30.6458	30.6881	30.9609	30.7533	30.6372
Q9UBC2	Epidermal growth factor receptor substrate 15-like 1	EPS15L1	26	26	49.2	94.254	133.64			29.8234	29.8623	29.8858	29.6355	29.9117	29.8019	29.6781	29.7486	29.611	30.0479	29.7405	29.5933
P06396	Gelsolin	GSN	30	17	55.5	85.696	323.31			31.3033	31.7006	32.1392	31.2647	31.8119	32.2924	33.4581	33.4581	33.3033	33.6839	33.5754	33.3303
P30043	Flavin reductase (NADPH)	BLVRB	8	8	65.5	22.119	66.192			30.6198	30.7927	30.8004	30.5389	30.8081	30.8608	30.2647	30.2759	30.1239	30.5203	30.1239	30.362
P62330	ADP-ribosylation factor 6	ARF6	3	3	36	20.082	10.126			NaN	26.9869	27.0084	NaN	26.8623	26.604	NaN	NaN	26.7517	NaN	NaN	26.8741
P62244	40S ribosomal protein S15a	RPS15A	10	10	73.8	14.839	36.672			31.8385	31.6415	31.8608	31.8234	31.6713	31.7413	31.6329	31.6329	31.7573	31.9574	31.7453	31.6839
P51532	Transcription activator BRG1	SMARCA4	19	19	16.4	184.64	147.77			29.708	29.2193	29.6407	29.673	29.2736	29.5071	29.0427	29.3557	29.2007	29.099	29.4134	29.4571
P49407	Beta-arrestin-1	ARRB1	15	14	55.5	47.065	154.58			30.0217	29.5109	29.4134	30.196	29.7502	29.6005	30.7292	30.8157	30.7613	30.5664	31.13	30.933
Q5JVF3	PCI domain-containing protein 2	PCID2	10	10	35.1	46.029	94.813			27.6251	27.5014	27.6527	27.7129	27.3578	27.673	27.5536	27.509	27.3828	27.673	27.6798	27.4707
Q16795	NADH dehydrogenase [ubiquinone] 1 alpha subcomplex subunit 9, mitochondrial	NDUFA9	11	11	35.5	42.509	15.863			28.249	28.0813	28.3951	28.2803	28.1361	28.4512	27.8799	28.0084	28.0401	27.6389	28.141	28.4234
Q14697	Neutral alpha-glucosidase AB	GANAB	51	51	67.7	106.87	323.31			34.3763	34.2549	34.1223	34.4943	34.402	34.3303	34.7603	34.5867	34.5641	34.7994	34.8042	34.6944
O95573	Long-chain-fatty-acid--CoA ligase 3	ACSL3	27	26	50.3	80.419	258.72			31.9882	31.6798	31.7006	31.8719	31.7494	31.5435	32.0117	32.2106	31.9814	32.4284	32.1453	31.9882
Q9H3N1	Thioredoxin-related transmembrane protein 1	TMX1	9	9	28.9	31.791	45.345			29.5426	29.4668	29.524	29.7113	29.6831	29.5555	29.2193	29.5389	29.2714	29.5481	29.5609	29.3109
Q8WVM8	Sec1 family domain-containing protein 1	SCFD1	9	9	24.3	72.379	129.46			28.2979	28.5898	28.4707	28.4785	28.6595	28.6561	28.5826	28.604	28.3196	28.877	28.4551	28.5426
P08133	Annexin A6	ANXA6	46	46	70.6	75.872	323.31			34.2619	34.2689	34.0673	34.3633	34.3633	34.0832	34.4146	34.3892	34.1377	34.5922	34.5179	34.1975
P46087	Probable 28S rRNA (cytosine(4447)-C(5))-methyltransferase	NOP2	10	10	15.8	89.301	21.445			28.7927	28.249	28.877	28.8142	28.5426	28.8264	28.8264	28.9705	28.9622	29.2891	28.8653	28.9567
P15311	Ezrin	EZR	34	23	53.6	69.412	323.31			31.0927	31.4384	31.6501	30.9609	31.3672	31.6372	30.6022	30.4727	30.6964	30.5844	30.8004	30.7771
Q9UBQ0	Vacuolar protein sorting-associated protein 29	VPS29	5	5	39	20.505	12.938			30.4532	30.099	30.0609	30.4032	30.0479	30.0609	30.2979	29.9117	30.1361	30.4134	29.94	30.3724
O75886	Signal transducing adapter molecule 2	STAM2	7	5	16.4	58.164	11.637			27.1214	27.3745	27.3828	27.0084	27.3828	27.4551	NaN	NaN	27.2714	NaN	NaN	27.3992
Q13586	Stromal interaction molecule 1	STIM1	10	9	20.3	77.422	95.765			27.4862	27.0914	27.0296	27.1507	27.2625	27.0813	28.2979	28.55	28.3324	28.6931	28.5682	28.2935
P19404	NADH dehydrogenase [ubiquinone] flavoprotein 2, mitochondrial	NDUFV2	9	9	47.8	27.391	51.8			28.6898	28.391	28.55	28.6998	28.5862	28.6146	28.3951	28.5933	28.5165	28.4073	28.6931	28.7771
Q9P258	Protein RCC2	RCC2	23	23	57.9	56.084	323.31			32.3463	31.9609	31.9916	32.4483	32.0184	31.9983	31.8004	31.5664	31.8347	31.995	31.7613	31.8385
O75569	Interferon-inducible double-stranded RNA-dependent protein kinase activator A	PRKRA	9	9	41.5	34.404	77.224			29.1386	29.0788	29.0634	29.1507	29.0505	29.196	29.6612	29.6355	29.5147	29.5951	29.6578	29.9259
O75832	26S proteasome non-ATPase regulatory subunit 10	PSMD10	7	7	42.5	24.428	63.443			30.2979	30.2979	30.0864	30.3828	30.362	29.995	30.2535	30.4134	30.0349	30.5109	30.3515	30.2422
Q9BZK7	F-box-like/WD repeat-containing protein TBL1XR1	TBL1XR1	6	4	22.2	55.594	144.31			27.7453	27.5898	27.5898	27.726	27.7389	27.8858	27.2535	27.217	27.1507	27.611	27.1795	27.1795
P60953	Cell division control protein 42 homolog	CDC42	8	7	57.1	21.258	50.066			30.5296	30.8004	30.6285	30.5844	30.6798	30.5573	30.7927	30.7849	30.8004	31.1115	30.9045	30.7373
Q6UB35	Monofunctional C1-tetrahydrofolate synthase, mitochondrial	MTHFD1L	17	17	29	105.79	35.36			28.8504	28.267	28.673	28.9456	28.203	28.6424	27.2891	27.9372	27.7708	27.9977	27.4394	27.965
Q8NCA5	Protein FAM98A	FAM98A	11	10	32	55.4	164.31			30.0084	29.995	30.1361	29.84	29.995	29.9814	29.6998	29.7581	29.6285	30.0737	29.7146	29.6629
O15121	Sphingolipid delta(4)-desaturase DES1	DEGS1	3	3	15.8	37.866	10.458			27.2714	27.2891	27.341	26.9088	27.2535	27.2625	27.0084	27.3066	27.17	27.3494	27.3662	27.17
P53582	Methionine aminopeptidase 1	METAP1	7	7	34.2	43.215	37.912			28.9622	28.6458	28.9622	28.976	28.976	29.0084	29.0531	28.9231	29.1386	29.0243	29.203	29.2781
Q9H061	Transmembrane protein 126A	TMEM126A	5	5	22.6	21.527	6.0837			26.4024	26.5135	26.6865	NaN	26.6865	26.4536	26.3811	26.4984	NaN	NaN	26.632	26.5165
Q14353	Guanidinoacetate N-methyltransferase	GAMT	3	3	32.2	26.318	31.016			28.4746	28.1361	28.459	28.5573	28.2308	28.6898	28.4668	28.5536	28.4154	28.7802	28.6075	28.4314
O60784	Target of Myb protein 1	TOM1	7	7	29.7	53.818	45.077			26.7129	27.0401	27.0914	26.8974	27.3239	27.1795	27.189	27.1604	27.5014	27.3992	27.2353	27.6181
P48729;Q8N752	Casein kinase I isoform alpha;Casein kinase I isoform alpha-like	CSNK1A1;CSNK1A1L	8	8	26.7	38.914	12.186			27.4314	27.3828	27.1312	27.391	27.1312	27.1115	27.1604	27.4473	27.5389	27.604	27.4862	27.4785
Q14203	Dynactin subunit 1	DCTN1	38	38	41.3	141.69	323.31			31.1842	31.1724	31.13	31.1901	31.1604	31.1239	31.13	31.1239	31.0673	31.4134	31.2479	31.0349
Q14108	Lysosome membrane protein 2	SCARB2	9	9	24.5	54.29	60.975			30.3303	30.1115	30.1239	30.3828	30.4919	30.3088	30.8755	31.0479	30.9117	30.94	31.0283	31.2591
Q9BS26	Endoplasmic reticulum resident protein 44	ERP44	17	17	58.9	46.971	143.01			30.7771	30.947	30.8234	30.7927	30.933	30.8974	32.1544	32.1753	31.9677	32.1483	32.4532	32.08
P49441	Inositol polyphosphate 1-phosphatase	INPP1	12	12	39.3	43.998	68.335			28.8653	29.0164	28.805	29.0084	29.1483	28.6251	30.0737	30.099	30.2422	30.2535	30.1239	30.4433
Q5SY16	Polynucleotide 5-hydroxyl-kinase NOL9	NOL9	10	10	25.9	79.322	27.619			28.1842	28.003	28.1842	28.4862	27.9428	28.1842	28.003	28.0401	28.2445	NaN	28.1747	28.2891
O95487	Protein transport protein Sec24B	SEC24B	11	11	12.5	137.42	39.611			27.1507	27.3578	27.391	27.17	27.3828	27.2535	27.6998	27.7195	27.6389	NaN	27.965	27.6595
Q15050	Ribosome biogenesis regulatory protein homolog	RRS1	7	7	30.7	41.193	128.48			27.8623	27.7195	27.7895	27.7895	27.6527	27.4073	27.4785	27.6798	27.8974	27.9146	NaN	27.7453
P55795	Heterogeneous nuclear ribonucleoprotein H2	HNRNPH2	10	5	28.7	49.263	85.717			29.3971	29.267	29.604	29.4746	29.4746	29.57	29.5165	29.6216	29.5518	29.588	29.8004	29.6998
Q13363	C-terminal-binding protein 1	CTBP1	11	7	26.1	47.535	226.59			28.8945	29.1913	29.0505	28.877	29.0375	29.0788	30.0084	29.94	29.8901	29.9259	30.1842	30.1239
Q8WUM4	Programmed cell death 6-interacting protein	PDCD6IP	40	40	53	96.022	294.32			32.1513	32.1813	32.2193	32.2897	32.2365	32.2308	32.2507	32.2952	32.1513	32.5754	32.3303	32.1724
P35249	Replication factor C subunit 4	RFC4	14	14	45.5	39.681	62.244			30.0609	29.9539	30.0609	30.1604	30.2077	30.2979	29.5296	29.4551	29.6268	29.7771	29.3536	29.8415
Q969Q0;P83881	60S ribosomal protein L36a-like;60S ribosomal protein L36a	RPL36AL;RPL36A	3	3	28.3	12.469	5.3191			29.114	28.8653	28.8682	28.9456	28.8294	28.5933	28.4194	28.7988	28.5682	28.509	28.8355	28.8445
P48651	Phosphatidylserine synthase 1	PTDSS1	6	6	16.3	55.527	17.705			28.4938	27.8564	28.5718	28.55	28.1652	28.6005	28.3367	28.805	28.877	28.6389	28.7292	29.0737
P49366	Deoxyhypusine synthase	DHPS	7	7	24.1	40.97	8.5221			NaN	NaN	NaN	NaN	26.6998	NaN	NaN	NaN	26.5898	NaN	26.726	NaN
O75792	Ribonuclease H2 subunit A	RNASEH2A	8	8	43.1	33.395	39.694			27.4785	27.2077	27.1604	27.7708	27.3494	27.1984	27.4785	27.3662	27.5014	27.8081	27.0711	27.7708
Q8WWI1	LIM domain only protein 7	LMO7	9	9	8.7	192.69	34.66			26.1488	26.341	26.2979	26.0854	26.3828	26.5667	NaN	25.9606	26.0254	NaN	NaN	26.1293
Q12788	Transducin beta-like protein 3	TBL3	15	15	29.5	89.034	159.84			29.0217	28.8019	28.673	29.0111	28.7581	28.8173	28.5203	28.7064	28.4433	28.632	28.7676	28.6898
P19338	Nucleolin	NCL	27	27	39.4	76.613	323.31			34.1828	34.0673	34.1901	34.2759	34.1529	34.2265	34.1146	34.1901	34.0832	34.402	34.2478	34.1377
P58546	Myotrophin	MTPN	7	7	65.3	12.895	144.01			30.2422	30.1604	30.3196	30.3515	30.2759	30.4334	30.5754	30.5389	30.611	30.7692	30.7129	30.6458
P02462	Collagen alpha-1(IV) chain;Arresten	COL4A1	9	9	11.4	160.61	142.33			28.4707	28.7325	28.7645	28.1015	28.8858	28.8234	28.7613	28.8564	29.2054	29.258	28.8173	29.1628
Q99638	Cell cycle checkpoint control protein RAD9A	RAD9A	2	2	6.1	42.547	2.9879			NaN	NaN	26.3762	NaN	26.5898	26.346	25.9606	26.0084	NaN	NaN	26.1214	NaN
Q7Z7H5	Transmembrane emp24 domain-containing protein 4	TMED4	7	6	32.2	25.943	24.882			27.8504	28.1015	28.1312	28.1459	28.5352	28.2759	27.8081	27.8974	27.604	NaN	27.8324	27.9869
Q92643	GPI-anchor transamidase	PIGK	5	5	24.8	45.251	13.376			26.8741	NaN	NaN	26.7895	NaN	26.9203	26.9203	26.5255	26.8264	27.0609	NaN	26.726
Q9UQB8	Brain-specific angiogenesis inhibitor 1-associated protein 2	BAIAP2	4	4	9.2	60.867	10.929			26.5075	26.5725	26.6865	26.3729	26.1908	26.6865	NaN	26.3877	25.6237	26.1946	NaN	NaN
Q6UXN9	WD repeat-containing protein 82	WDR82	8	8	32.6	35.079	25.2			27.0084	NaN	27.0084	26.8974	26.8974	26.7895	26.9088	NaN	26.5285	27.0711	26.8504	26.6595
Q8IY95	Transmembrane protein 192	TMEM192	3	3	11.8	30.922	3.7414			NaN	NaN	NaN	NaN	NaN	NaN	26.726	26.9203	NaN	NaN	NaN	26.965
Q6P5R6	60S ribosomal protein L22-like 1	RPL22L1	4	3	45.9	14.606	34.408			27.9977	27.9031	28.5203	27.8203	NaN	28.3452	29.5862	29.5664	29.5627	29.6595	29.5916	29.8667
P06132	Uroporphyrinogen decarboxylase	UROD	13	13	48.5	40.786	151.25			30.6458	30.3828	30.4919	30.7373	30.5844	30.7292	31.6329	31.4134	31.2422	31.6713	31.6544	31.393
O00442	RNA 3-terminal phosphate cyclase	RTCA	9	9	37.7	39.336	23.033			28.6492	28.8081	28.8858	28.6798	28.9595	29.0889	27.7195	27.5609	27.7129	27.3066	28.0296	27.976
Q9Y371	Endophilin-B1	SH3GLB1	8	8	29.3	40.796	38.734			27.1507	27.9539	28.0453	27.2445	27.6595	27.8081	27.2979	27.141	27.2445	NaN	NaN	27.3662
P15104	Glutamine synthetase	GLUL	3	3	11.8	42.064	4.9642			NaN	NaN	NaN	NaN	NaN	NaN	26.3645	NaN	26.3745	NaN	NaN	26.5105
Q03252	Lamin-B2	LMNB2	32	29	51.5	69.948	116.62			31.1422	30.995	30.8974	31.1483	31.0609	30.9045	31.2479	31.2814	31.2869	31.3196	31.3724	31.5389
P49006	MARCKS-related protein	MARCKSL1	6	6	69.2	19.529	246.58			30.3088	30.4919	29.995	30.341	30.2647	30.0864	31.015	31.0017	31.0479	31.4433	31.1544	30.8157
P35998	26S protease regulatory subunit 7	PSMC2	30	30	68.1	48.633	323.31			32.3006	32.5956	32.686	32.1901	32.4284	32.4184	31.7373	31.6964	31.7731	32.0544	31.7771	31.7771
Q04917	14-3-3 protein eta	YWHAH	18	16	58.5	28.218	201.67			31.0737	31.225	31.2647	31.0479	31.13	31.1664	30.8974	30.9259	30.8608	31.2135	30.933	30.9539
P53992	Protein transport protein Sec24C	SEC24C	22	21	29.3	118.32	76.097			31.1483	31.2308	31.3033	31.1724	31.2135	31.2308	31.6285	31.7573	31.6022	31.94	31.8157	31.6501
Q8IXL7	Methionine-R-sulfoxide reductase B3	MSRB3	3	3	42.7	20.702	18.12			NaN	NaN	NaN	NaN	NaN	NaN	28.0557	28.0137	28.1795	NaN	27.9705	28.4473
P50502;Q8NFI4;Q8IZP2	Hsc70-interacting protein;Putative protein FAM10A5;Putative protein FAM10A4	ST13;ST13P5;ST13P4	10	10	27.6	41.331	58.974			31.8081	31.8534	31.6242	31.5481	31.8157	31.6923	31.099	31.1604	30.9882	31.4483	31.1664	31.0349
Q15345	Leucine-rich repeat-containing protein 41	LRRC41	6	6	14.9	88.649	20.628			26.8741	26.8264	27.0296	27.17	26.9316	27.0813	27.6458	27.5898	27.189	NaN	27.7389	27.5165
P62745	Rho-related GTP-binding protein RhoB	RHOB	6	4	32.7	22.123	6.9274			27.0914	27.6865	27.6458	NaN	27.4073	27.1795	27.1604	27.3662	27.604	27.4938	NaN	27.5682
Q9NTK5	Obg-like ATPase 1	OLA1	21	21	58.6	44.743	107.46			30.8234	30.6629	30.7771	30.6964	30.6372	30.7613	30.995	30.7927	30.9259	31.3463	30.8309	30.9188
Q9BTX1	Nucleoporin NDC1	NDC1	3	3	7.7	76.304	14.057			26.425	NaN	25.8433	25.9977	25.7945	NaN	26.0317	26.4089	26.346	NaN	26.1927	26.604
P28066	Proteasome subunit alpha type-5	PSMA5	11	11	52.7	26.411	323.31			32.1574	32.2869	32.3802	32.1331	32.2759	32.4556	32.3568	32.3568	32.1483	32.6437	32.4007	32.2308
P35270	Sepiapterin reductase	SPR	4	4	24.1	28.048	8.4444			NaN	NaN	25.902	NaN	25.9066	26.0254	25.5926	25.8457	25.8019	NaN	26.1833	25.5345
Q12931	Heat shock protein 75 kDa, mitochondrial	TRAP1	23	23	44.6	80.109	323.31			31.8042	31.4284	31.4134	32.0447	31.5481	31.5844	31.9295	32.0184	32.1783	32.1604	32.025	32.3646
Q9Y3T9	Nucleolar complex protein 2 homolog	NOC2L	7	7	9.9	84.918	10.512			27.189	26.8974	26.9539	27.2445	26.8385	27.019	26.3943	26.6865	26.53	NaN	26.632	26.7389
P18859	ATP synthase-coupling factor 6, mitochondrial	ATP5J	5	5	44.4	12.587	256.18			30.1842	29.7786	29.94	30.196	30.0217	30.196	30.2647	30.5389	30.3724	30.5933	30.3088	30.6964
Q9UJW0	Dynactin subunit 4	DCTN4	14	14	51.5	52.337	98.607			29.6629	29.6998	29.7096	29.3388	29.5933	29.6181	29.109	29.2736	29.3536	29.6998	29.2054	29.2193
Q8WVY7	Ubiquitin-like domain-containing CTD phosphatase 1	UBLCP1	9	9	27	36.804	13.944			27.7064	27.4394	27.6931	27.5463	27.4314	27.9088	27.7195	27.8019	27.7453	27.8974	27.9316	27.8682
Q8IWJ2	GRIP and coiled-coil domain-containing protein 2	GCC2	11	9	10	195.91	31.709			NaN	NaN	NaN	NaN	NaN	NaN	NaN	26.7771	26.512	NaN	26.9539	26.6181
P05388;Q8NHW5	60S acidic ribosomal protein P0;60S acidic ribosomal protein P0-like	RPLP0;RPLP0P6	17	17	66.2	34.273	163.64			33.4209	33.5867	33.5641	33.4334	33.4702	33.3956	33.5062	33.4823	33.3828	33.7751	33.5412	33.4823
O15484	Calpain-5	CAPN5	3	3	8.1	73.168	7.4576			26.1661	26.7771	26.3844	NaN	26.1565	26.4923	26.4073	NaN	26.632	NaN	NaN	26.673
Q96KR1	Zinc finger RNA-binding protein	ZFR	20	20	31.4	117.01	266.36			29.4532	29.5772	29.7309	29.5682	29.6146	29.4881	29.4649	29.57	29.5933	29.6612	29.8355	29.5591
P35268	60S ribosomal protein L22	RPL22	4	3	45.3	14.787	26.768			31.978	31.5978	32.0084	31.7849	32.0084	31.8309	31.3672	31.7373	31.6839	31.6586	31.6501	31.9224
Q92688	Acidic leucine-rich nuclear phosphoprotein 32 family member B	ANP32B	9	7	33.9	28.787	148.59			31.2647	31.2422	31.196	31.3463	31.1239	31.3982	31.7771	31.6586	31.6756	31.6372	31.8608	32.025
Q99496	E3 ubiquitin-protein ligase RING2	RNF2	5	3	22.9	37.655	22.361			27.0813	27.2262	27.1795	27.2714	26.7895	27.2803	26.7389	26.7129	27.0505	26.9088	27.141	26.9088
Q15008	26S proteasome non-ATPase regulatory subunit 6	PSMD6	22	22	62.5	45.531	163.94			31.2535	31.2703	31.2077	31.1901	31.225	31.1842	31.3672	31.3879	31.2703	31.7652	31.393	31.2591
P55196	Afadin	MLLT4	29	29	26.6	206.8	91.196			29.3992	29.6303	29.5147	29.2913	29.3494	29.3153	28.6389	28.6697	28.4551	28.7389	28.805	28.6629
Q8IXH7	Negative elongation factor C/D	NELFCD	8	8	19	66.246	15.195			NaN	NaN	NaN	26.9869	NaN	NaN	27.341	27.6251	27.17	27.3066	27.8324	27.4154
Q6P9B9	Integrator complex subunit 5	INTS5	6	6	12.4	107.99	15.925			26.5105	26.2299	26.3101	26.3992	26.3359	26.2856	NaN	NaN	26.1214	26.3101	NaN	26.2243
P98194	Calcium-transporting ATPase type 2C member 1	ATP2C1	5	5	7.6	100.58	9.6962			NaN	NaN	NaN	NaN	NaN	NaN	26.038	25.9628	25.7234	26.3595	25.8552	25.9111
P39059	Collagen alpha-1(XV) chain;Restin;Restin-2;Restin-3;Restin-4	COL15A1	7	7	7.6	141.72	14.581			NaN	NaN	NaN	NaN	NaN	NaN	NaN	NaN	27.6389	NaN	NaN	27.7833
O00178	GTP-binding protein 1	GTPBP1	6	6	13.9	72.453	17.679			27.0609	26.976	26.6998	27.1507	26.976	27.1312	27.5165	27.5536	27.2262	NaN	27.6663	27.5014
O94826	Mitochondrial import receptor subunit TOM70	TOMM70A	20	20	56.7	67.454	194.58			29.6981	29.673	29.6128	29.7533	29.6781	29.7755	29.5862	29.7833	29.7849	29.7389	29.8653	29.9814
Q12996	Cleavage stimulation factor subunit 3	CSTF3	12	12	23.8	82.921	35.15			27.8385	27.8324	28.2262	27.9977	27.8385	28.1263	27.6798	27.3494	27.5463	27.4394	27.8858	NaN
P63279	SUMO-conjugating enzyme UBC9	UBE2I	13	13	79.1	18.007	70.63			31.4483	30.6629	31.3033	31.4384	30.6458	31.3828	31.1361	30.8157	30.9677	31.2703	30.947	31.1422
O95159	Zinc finger protein-like 1	ZFPL1	8	8	36.5	34.114	60.158			28.3153	28.632	28.5052	28.3153	28.7325	28.6146	28.2353	28.1164	28.1015	NaN	28.0084	28.5426
Q9NX63	MICOS complex subunit MIC19	CHCHD3	5	5	28.6	26.152	9.8778			28.3578	28.3869	28.362	28.2123	28.6181	NaN	28.5128	29.0243	28.8081	28.8385	28.877	29.104
Q9H0L4	Cleavage stimulation factor subunit 2 tau variant	CSTF2T	9	4	33	64.436	239.78			26.5754	26.8142	26.7895	26.976	26.604	26.7645	26.9203	26.9869	26.8142	27.0609	NaN	27.0505
Q15067	Peroxisomal acyl-coenzyme A oxidase 1	ACOX1	14	14	36.7	74.423	78.545			29.4234	29.5682	29.84	29.3023	29.3346	29.461	29.8579	29.8711	29.8081	30.099	30.0084	29.8741
P14625	Endoplasmin	HSP90B1	59	57	66	92.468	323.31			36.1185	36.3084	35.9742	36.2229	36.4004	36.0059	36.2549	36.2102	36.151	36.5076	36.3253	36.2139
O94776	Metastasis-associated protein MTA2	MTA2	20	17	38.3	75.022	49.289			30.6713	30.6285	30.6285	30.5109	30.5754	30.8004	30.0864	30.0084	30.362	30.2647	30.341	30.3196
O15143	Actin-related protein 2/3 complex subunit 1B	ARPC1B	13	12	49.2	40.949	299.06			30.9609	31.08	31.0414	30.9677	30.8309	31.0414	32.1724	32.1901	32.1239	32.4032	32.2731	32.2507
Q8N5W9	Filamin-interacting protein FAM101B	FAM101B	3	3	29.4	22.882	18.035			NaN	26.8264	27.1507	27.0711	26.9203	26.965	26.4738	NaN	26.8974	NaN	NaN	26.8504
Q9NX46	Poly(ADP-ribose) glycohydrolase ARH3	ADPRHL2	9	9	41.3	38.946	62.443			27.8324	27.8385	28.1556	28.066	27.9869	27.965	28.6075	28.611	28.2625	28.7833	28.5278	28.6285
Q9Y5N5	HemK methyltransferase family member 2	N6AMT1	5	5	36.9	22.957	14.727			28.0296	28.0557	28.1361	28.189	28.1361	28.0243	27.4234	27.1507	27.5014	27.7453	27.189	27.5609
P52907	F-actin-capping protein subunit alpha-1	CAPZA1	14	12	71.3	32.922	323.31			32.1753	32.2365	31.9882	32.1724	32.1574	32.1208	31.9609	31.9916	31.9259	32.1544	32.1513	32.015
Q8N2K0	Monoacylglycerol lipase ABHD12	ABHD12	11	11	44.2	45.096	54.493			28.3662	28.0813	28.0557	28.5278	28.341	28.3578	29.027	29.21	28.8799	29.2825	29.1771	29.1189
O00170	AH receptor-interacting protein	AIP	14	14	54.5	37.636	109.41			29.8858	29.6915	29.5352	29.8035	29.7771	29.5463	29.4374	29.5147	29.2957	29.7437	29.459	29.4842
Q01813	ATP-dependent 6-phosphofructokinase, platelet type	PFKP	25	22	40.3	85.595	323.31			31.1544	31.225	31.1177	31.099	31.08	31.1361	31.1842	31.0927	30.8901	31.5481	31.1483	30.846
P55060	Exportin-2	CSE1L	33	33	42.1	110.42	323.31			33.2619	32.9347	32.9729	33.1619	32.8081	33	32.3879	32.3383	32.1783	32.5889	32.4943	32.2619
P61019	Ras-related protein Rab-2A	RAB2A	12	7	63.2	23.545	187.29			30.1361	30.0217	30.1239	30.1361	30.2535	30.2193	31.0017	31.1724	31.1544	31.3828	31.1842	31.2135
Q9H3U1	Protein unc-45 homolog A	UNC45A	11	11	16.6	103.08	17.755			27.0505	26.7771	26.7645	27.141	26.7517	26.7389	26.6998	26.8858	26.8741	NaN	26.976	NaN
P52888	Thimet oligopeptidase	THOP1	15	15	24.4	78.839	64.963			29.6058	29.5844	29.5444	29.4823	29.5033	29.5389	29.766	29.8081	29.7692	30.1239	29.9117	29.7325
O60547	GDP-mannose 4,6 dehydratase	GMDS	8	8	32	41.949	10.684			26.7645	27.189	27.0609	26.8623	26.673	NaN	26.632	26.558	26.6998	NaN	26.7895	NaN
Q5JPE7;P69849;Q15155	Nodal modulator 2;Nodal modulator 3;Nodal modulator 1	NOMO2;NOMO3;NOMO1	32	32	38.3	139.44	163.14			30.9045	30.5389	30.8755	30.9117	30.8157	30.8682	30.7613	30.995	31.0217	31.0864	31.0737	31.0864
Q9Y6A4	Cilia- and flagella-associated protein 20	CFAP20	7	7	46.1	22.774	14.459			27.6527	NaN	NaN	27.6931	27.1795	NaN	27.8445	27.8019	27.9539	NaN	27.9088	28.1214
Q9Y2S7	Polymerase delta-interacting protein 2	POLDIP2	9	9	36.4	42.033	21.104			28.9484	28.8173	28.995	29.0322	28.7227	28.9203	28.8741	28.877	28.7292	28.9344	28.8858	29.109
Q7L2E3	Putative ATP-dependent RNA helicase DHX30	DHX30	12	12	15	133.94	23.029			27.8741	27.4707	27.4785	27.8324	27.7195	27.6595	27.2625	27.7895	27.5682	28.019	27.4473	27.5969
O95372	Acyl-protein thioesterase 2	LYPLA2	5	5	41.1	24.737	36.199			29.0889	28.0864	28.6458	28.9512	28.0296	27.965	28.5426	27.9203	27.8623	28.0084	NaN	28.5315
Q3ZCQ8	Mitochondrial import inner membrane translocase subunit TIM50	TIMM50	5	5	20.1	39.646	75.498			27.976	27.8564	27.9814	28.2891	27.7771	28.0349	27.6798	27.8504	27.8682	27.6663	28.1556	27.9923
[truncated: 3,418 more rows]
