# Supplementary material for: Combined Inhibition of AKT and KIT Restores Expression of Programmed Cell Death 4 (PDCD4) in Gastrointestinal Stromal Tumor
Source: Cancers (Basel). 2021 Jul 23;13(15):3699. doi: 10.3390/cancers13153699 (PMC8345102; doi:10.3390/cancers13153699)
Supplement: Supplementary file 1 [file cancers-13-03699-s001.zip › Data file S2.xlsx]

## Sheet: GIST-T1829 >1UP S0=2
Combined Inhibition of AKT and KIT Restores Expression of Programmed Cell Death 4 (PDCD4) in Gastrointestinal Stromal Tumor
Marya Kozinova, Shalina Joshi, Shuai Ye, Martin G. Belinsky, Dinara Sharipova, Jeffrey M. Farma, Sanjay Reddy, Samuel Litwin, Karthik Devarajan, Alex Rosa Campos, Yi Yu, Brian Schwartz, Margaret von Mehren, and Lori Rink
Data file S2. Defining proteins abundance upregulated or downregulated amongst IM&MK-4440 treated and paired untreated in GIST cell line lysates identified using LC-MS/MS analysis
Table relates to the section Protein Extraction and LC-MS/MS Analysis.
GIST cell lines were treated for 20 hours with IM/MK-4440 combination at the following concentrations, 40nM/120nM (GIST-T), 1uM/3uM (GIST-T1/829) or corresponding amount of DMSO (control) in three biological replicates (R1, R2, R3).
Raw MS data was analyzed in MaxQuant and searched against the curated (Swiss-Prot) Homo sapiens Uniprot protein sequence database and GPM cRAP sequences (commonly known protein contaminants).
The MaxQuant output file was imported and susequently analyzed in Perseus
Label-free quantitation intensity (LFQ) values were log2 transformed, filtered in the following manner: proteins identified by site only were removed, potential contaminants were removed and filtered for proteins identified by >1 unique peptides, (NaN represents missing values).
LFQ data were annotated, filtered for valid values in 100% repeats at least at one of the experimental conditions, and subjected to a Student's T-test (S0=0.1, Permutation-based FDR <0.05, 250 randomizations)
Supplementary Data File S2A: The differentially expressed proteins between IM&MK-4440 treated and paired untreated lysates in GIST-T1/829 cell line
Significant	"-LOG(P-value)"	Difference	Majority protein IDs	Protein names	Gene names	Peptides	Unique peptides	Sequence coverage [%]	Mol. weight [kDa]	Score	Log2(LFQ intensity, NaN imputed)						Log2(LFQ intensity, NaN are not imputed)
											GIST-T1/829-R1	GIST-T1/829-R2	GIST-T1/829-R3	GIST-T1/829-20h-IM/MK-4440-R1	GIST-T1/829-20h-IM/MK-4440-R2	GIST-T1/829-20h-IM/MK-4440-R2	GIST-T1-R1	GIST-T1-R2	GIST-T1R3	GIST-T1-20h-IM/MK-4440-R1	GIST-T1-20h-IM/MK-4440-R2	GIST-T1-20h-IM/MK-4440-R2
+	3.47854	-2.98488	P11926	Ornithine decarboxylase	ODC1	7	7	21.3	51.148	48.766	27.6663	28.3023	28.3951	25.2812	24.8883	25.2394	28.4394	28.3992	28.6764	NaN	NaN	26.4999
+	4.34554	-2.66745	Q9Y4C2	TRPM8 channel-associated factor 1	TCAF1	12	12	17.3	102.12	26.42	27.8324	28.189	28.003	25.5147	25.3212	25.1861	28.4976	28.1842	28.965	NaN	27.2262	NaN
+	0.892881	-2.54003	P18077	60S ribosomal protein L35a	RPL35A	5	5	29.1	12.538	4.2763	29.5222	29.1937	29.7517	29.4862	26.2895	25.0718	NaN	NaN	29.4995	NaN	29.5203	NaN
+	3.26956	-2.53746	P15153	Ras-related C3 botulinum toxin substrate 2	RAC2	7	2	44.8	21.429	2.5946	27.5165	27.4473	27.5969	25.3105	25.1392	24.4986	NaN	NaN	NaN	NaN	NaN	NaN
+	3.10663	-2.28414	Q13510	Acid ceramidase;Acid ceramidase subunit alpha;Acid ceramidase subunit beta	ASAH1	4	4	14.2	44.659	10.616	27.17	27.6798	27.3494	24.7307	25.2197	25.3963	27.6527	27.7195	27.4073	28.1937	27.9814	27.8858
+	1.23838	-2.14692	P35354	Prostaglandin G/H synthase 2	PTGS2	9	9	21.4	68.995	62.878	29.0217	28.3869	29.0057	28.1604	26.3118	25.5013	NaN	NaN	NaN	NaN	NaN	NaN
+	2.89105	-2.05716	Q96R06	Sperm-associated antigen 5	SPAG5	8	8	14.1	134.42	18.18	27.0084	26.7895	26.8264	24.6738	25.297	24.482	NaN	NaN	26.512	NaN	NaN	NaN
+	4.17273	1.94141	P04035	3-hydroxy-3-methylglutaryl-coenzyme A reductase	HMGCR	5	5	8.3	97.475	9.8002	25.2799	25.1032	25.3333	27.1015	27.3578	27.0813	NaN	NaN	NaN	NaN	NaN	NaN
+	3.37359	2.55372	P30049	ATP synthase subunit delta, mitochondrial	ATP5D	2	2	13.7	17.49	2.5184	25.653	26.1445	25.5504	28.611	28.0914	28.3066	NaN	NaN	28.5609	29.4804	29.158	29.1189
+	3.00552	2.61728	Q9NQX7	Integral membrane protein 2C;CT-BRI3	ITM2C	6	6	31.8	30.223	11.402	26.1708	25.3904	25.3988	28.2935	28.5315	27.9869	27.4314	27.8019	NaN	27.4785	27.604	27.7453
+	3.39198	2.69611	O14561	Acyl carrier protein, mitochondrial	NDUFAB1	3	3	15.4	17.417	6.3864	25.2925	26.0321	25.37	28.4194	28.1984	28.1652	28.7645	28.8623	NaN	29.6697	29.4113	28.673
+	1.57812	3.35708	Q53EL6	Programmed cell death protein 4	PDCD4	13	13	42.2	51.735	85.124	28.4629	26.3975	25.1596	30.3303	29.766	29.995	28.632	28.4473	NaN	29.7064	29.8279	30.0609
	0.978415	-2.20701	Q9UMS0	NFU1 iron-sulfur cluster scaffold homolog, mitochondrial	NFU1	4	4	21.3	28.462	6.9799	27.7389	27.6595	27.8445	24.2431	24.7468	27.632	27.4707	NaN	NaN	NaN	NaN	NaN
	0.455779	-1.91807	P62304	Small nuclear ribonucleoprotein E	SNRPE	4	4	65.2	10.803	15.709	30.2869	30.1604	30.3303	24.7171	30.0084	30.2979	29.9677	29.668	29.805	29.6146	29.94	29.9814
	1.60514	-1.90543	Q9UL63	Muskelin	MKLN1	8	8	16.6	84.767	32.152	27.2891	28.066	27.8504	24.9816	26.6865	25.8212	NaN	NaN	NaN	NaN	NaN	NaN
	0.84069	-1.86121	P36969	Phospholipid hydroperoxide glutathione peroxidase, mitochondrial	GPX4	6	6	42.1	22.174	12.003	27.8623	28.1459	28.0762	24.3686	27.9146	26.2177	27.4473	NaN	27.6663	NaN	NaN	NaN
	0.439571	-1.83556	Q9H299	SH3 domain-binding glutamic acid-rich-like protein 3	SH3BGRL3	3	3	32.3	10.438	7.8034	29.4433	29.8065	29.5315	24.1822	29.5591	29.5333	29.3641	29.4354	29.3044	NaN	29.2736	29.0557
	1.14914	-1.80265	Q96D46	60S ribosomal export protein NMD3	NMD3	6	6	18.5	57.603	18.565	26.3562	26.7389	27.0609	23.9414	24.5113	26.2954	NaN	NaN	NaN	NaN	NaN	NaN
	1.20743	-1.7067	P55287	Cadherin-11	CDH11	2	2	7.3	87.964	10.676	26.8019	27.2714	26.976	26.512	25.1368	24.2804	26.9428	NaN	NaN	NaN	NaN	NaN
	0.806594	-1.69582	Q15291	Retinoblastoma-binding protein 5	RBBP5	6	6	21.9	59.152	42.642	27.2077	27.6527	27.4394	27.6595	24.6493	24.9035	NaN	NaN	NaN	NaN	NaN	NaN
	0.74673	-1.6708	Q15555	Microtubule-associated protein RP/EB family member 2	MAPRE2	5	5	31.8	37.031	14.725	28.6216	28.8355	28.4032	28.362	24.9693	27.5165	NaN	NaN	27.3066	NaN	NaN	NaN
	0.527969	-1.56218	P60468	Protein transport protein Sec61 subunit beta	SEC61B	3	3	37.5	9.9743	6.6051	28.7739	28.6458	28.9622	28.2216	24.6566	28.8173	28.8112	NaN	28.7833	NaN	NaN	28.6931
	0.600628	-1.53868	P05204	Non-histone chromosomal protein HMG-17	HMGN2	3	3	35.6	9.3926	3.2758	28.8653	29.17	29.7178	25.8376	29.7096	27.5898	NaN	NaN	NaN	NaN	NaN	NaN
	1.1609	-1.51187	P11137	Microtubule-associated protein 2	MAP2	4	4	3.8	199.52	18.589	27.7645	27.4394	27.2979	27.1604	25.5984	25.2073	NaN	NaN	NaN	NaN	NaN	NaN
	1.62483	-1.50743	P63272	Transcription elongation factor SPT4	SUPT4H1	4	4	28.2	13.193	3.2235	27.9203	26.6865	27.4154	25.9984	25.3838	26.1176	NaN	NaN	27.3745	NaN	NaN	NaN
	0.952561	-1.50137	P11166	Solute carrier family 2, facilitated glucose transporter member 1	SLC2A1	3	3	10	54.083	18.076	27.0813	27.0914	26.6998	24.7699	24.6905	26.9081	27.0084	27.0505	27.3324	NaN	NaN	26.4346
	0.785877	-1.44792	Q9GZY8	Mitochondrial fission factor	MFF	3	3	20.5	38.464	7.5989	28.1984	27.9428	27.8504	25.0703	27.9923	26.5853	NaN	NaN	27.8324	NaN	NaN	NaN
	0.395184	-1.42134	Q9BVC6	Transmembrane protein 109	TMEM109	2	2	5.3	26.21	6.1039	29.094	28.341	28.5609	24.2379	28.7389	28.7549	NaN	NaN	NaN	28.8173	29.003	29.0349
	1.0923	-1.39237	Q9GZQ8;A6NCE7	Microtubule-associated proteins 1A/1B light chain 3B;Microtubule-associated proteins 1A/1B light chain 3 beta 2	MAP1LC3B;MAP1LC3B2	4	2	27.2	14.688	3.2615	27.5609	27.4629	27.509	27.3153	25.5545	25.486	27.1312	27.3239	27.4551	NaN	NaN	26.7129
	0.696025	-1.38234	Q9ULH0	Kinase D-interacting substrate of 220 kDa	KIDINS220	16	16	14.8	196.54	96.687	27.391	27.189	26.8741	26.9539	24.0206	26.3324	27.4394	27.611	27.7195	27.1115	26.726	26.8741
	0.472631	-1.35337	P62837;P61077	Ubiquitin-conjugating enzyme E2 D2;Ubiquitin-conjugating enzyme E2 D3	UBE2D2;UBE2D3	3	3	36.1	16.735	9.5905	30.7292	30.4532	30.4629	30.4823	30.3828	26.7201	30.4334	30.0609	30.3515	30.2077	30.2422	30.3515
	0.793657	-1.34795	Q9NXV2	BTB/POZ domain-containing protein KCTD5	KCTD5	4	4	27.4	26.092	12.786	26.8974	26.8264	26.726	26.204	23.904	26.2979	26.6865	26.1776	26.8142	NaN	NaN	NaN
	0.78802	-1.34755	O15269	Serine palmitoyltransferase 1	SPTLC1	9	9	26	52.743	67.69	28.0137	28.6595	28.5609	25.5786	27.5014	28.1115	28.7833	28.6389	29.2007	28.8682	28.8564	28.8682
	0.495899	-1.33855	Q9HB40	Retinoid-inducible serine carboxypeptidase	SCPEP1	6	6	17.9	50.83	52.933	28.249	28.267	28.1263	24.5259	28.1747	27.9259	27.217	27.6527	27.0711	NaN	28.0349	27.1984
	0.834475	-1.32075	Q9UHN6	Transmembrane protein 2	TMEM2	23	22	20.5	154.37	38.064	28.2216	28.6663	27.8324	27.3745	27.8264	25.5571	29.4053	29.2557	29.0322	29.0296	28.6764	27.0401
	0.924882	-1.31118	P30279	G1/S-specific cyclin-D2	CCND2	6	5	31.1	33.067	18.65	26.9977	27.9203	27.8799	25.1245	26.6998	27.0401	27.17	27.2445	27.3578	NaN	NaN	26.515
	1.49612	-1.28573	Q6PD74	Alpha- and gamma-adaptin-binding protein p34	AAGAB	4	4	25.1	34.593	4.8089	27.1015	27.5826	27.3828	25.9889	25.469	26.7517	NaN	NaN	26.604	NaN	NaN	NaN
	0.500808	-1.26475	O00233	26S proteasome non-ATPase regulatory subunit 9	PSMD9	5	5	26.5	24.682	11.217	28.3109	28.3578	28.3452	28.1263	24.8672	28.2262	27.9539	28.3494	28.0557	28.0813	28.0296	NaN
	0.440688	-1.25515	Q6P5R6	60S ribosomal protein L22-like 1	RPL22L1	4	3	45.9	14.606	34.408	27.9977	27.9031	28.5203	27.8203	24.4901	28.3452	29.5862	29.5664	29.5627	29.6595	29.5916	29.8667
	0.8587	-1.2498	O95905	Protein SGT1	ECD	7	7	18.3	72.757	15.832	27.6389	27.9484	27.4394	27.1507	27.019	25.1075	NaN	26.3712	26.965	NaN	NaN	NaN
	0.825912	-1.23995	Q9P013	Spliceosome-associated protein CWC15 homolog	CWC15	3	3	16.6	26.624	24.769	27.8445	27.611	27.8916	25.255	26.7542	27.6181	NaN	NaN	NaN	NaN	NaN	NaN
	2.77642	-1.23299	Q5T0N5	Formin-binding protein 1-like	FNBP1L	5	5	12.2	70.065	8.8824	26.8385	26.9203	26.7129	25.4561	25.4214	25.8951	NaN	NaN	NaN	NaN	NaN	NaN
	3.24048	-1.22747	P46199	Translation initiation factor IF-2, mitochondrial	MTIF2	6	6	14.2	81.316	10.217	26.2243	26.4154	26.0567	25.1388	24.9438	24.9314	NaN	NaN	NaN	NaN	NaN	NaN
	0.557283	-1.21776	P62273	40S ribosomal protein S29	RPS29	2	2	32.1	6.6767	7.9003	29.9814	29.7833	30.362	29.3196	26.9815	30.1724	NaN	NaN	28.4938	NaN	NaN	NaN
	0.962946	-1.15731	Q08379	Golgin subfamily A member 2	GOLGA2	19	19	30	113.08	73.281	27.217	27.0609	27.6181	26.2768	26.9977	25.1496	29.0243	29.0889	29.1164	28.6629	28.6798	29.2007
	0.405497	-1.1385	Q9NX63	MICOS complex subunit MIC19	CHCHD3	5	5	28.6	26.152	9.8778	28.3578	28.3869	28.362	28.2123	28.6181	24.8608	28.5128	29.0243	28.8081	28.8385	28.877	29.104
	0.425546	-1.11872	Q96EY1	DnaJ homolog subfamily A member 3, mitochondrial	DNAJA3	11	11	25	52.488	22.244	28.066	27.7581	28.0243	28.1015	27.7895	24.6012	28.0762	27.8203	28.5315	28.9316	29.326	28.9372
	0.447601	-1.10632	P27707	Deoxycytidine kinase	DCK	9	9	48.1	30.518	284.89	28.9512	28.8234	28.9117	28.8019	28.9002	25.6651	28.7031	28.9567	28.8142	28.8445	28.6285	28.6931
	0.431812	-1.0929	Q15434	RNA-binding motif, single-stranded-interacting protein 2	RBMS2	4	4	15.5	43.958	18.833	27.524	27.9203	27.8019	24.5027	27.7453	27.7195	NaN	NaN	27.5826	NaN	NaN	NaN
	0.436538	-1.06763	Q15714	TSC22 domain family protein 1	TSC22D1	3	2	6.3	109.68	62.341	28.0711	27.7895	27.6998	27.9146	27.7389	24.704	29.1189	28.9344	28.7708	29.4881	29.2422	28.8173
	0.325348	-1.06689	O75844	CAAX prenyl protease 1 homolog	ZMPSTE24	9	9	23.8	54.812	21.666	28.6831	28.5128	28.8264	24.9244	29.1015	28.7958	29.7421	29.6964	29.6764	29.1819	29.94	29.7047
	0.453453	-1.04759	Q9NS86	LanC-like protein 2	LANCL2	8	8	25.1	50.854	26.309	27.7958	27.9088	28.003	27.6798	24.8767	28.0084	27.5536	NaN	27.8858	27.7895	27.6663	27.8385
	0.993963	-1.01521	P06400	Retinoblastoma-associated protein	RB1	8	8	11.9	106.16	16.603	26.7771	26.5898	26.604	25.2253	26.5898	25.1101	27.0813	27.0084	27.1984	27.1507	26.8741	26.6998
	0.2791	-0.995818	P21980	Protein-glutamine gamma-glutamyltransferase 2	TGM2	11	11	22.3	77.328	19.006	27.6527	28.7064	28.5203	24.5209	28.9677	28.4032	NaN	NaN	NaN	NaN	NaN	NaN
	0.501583	-0.995102	Q96FJ0	AMSH-like protease	STAMBPL1	10	10	33.9	49.783	13.302	28.0609	28.3494	28.2216	25.49	28.1164	28.0401	NaN	NaN	27.8504	NaN	NaN	NaN
	0.522275	-0.983611	P62745	Rho-related GTP-binding protein RhoB	RHOB	6	4	32.7	22.123	6.9274	27.0914	27.6865	27.6458	24.8861	27.4073	27.1795	27.1604	27.3662	27.604	27.4938	NaN	27.5682
	0.571164	-0.980886	P43007	Neutral amino acid transporter A	SLC1A4	4	4	16.9	55.722	12.877	27.0296	27.4785	27.4073	24.8255	27.1604	26.9869	NaN	26.7517	26.9977	NaN	NaN	NaN
	0.612613	-0.960599	P78310	Coxsackievirus and adenovirus receptor	CXADR	3	3	11.5	40.029	9.9611	26.53	26.7517	26.604	25.4498	26.976	24.5782	NaN	NaN	NaN	NaN	NaN	NaN
	0.376519	-0.959077	Q6P161	39S ribosomal protein L54, mitochondrial	MRPL54	3	3	48.6	15.819	28.34	28.4473	27.8974	28.258	28.3951	28.1984	25.1319	27.8324	28.1115	28.1842	28.9732	28.5128	29.0003
	0.469975	-0.959063	Q05519	Serine/arginine-rich splicing factor 11	SRSF11	5	5	15.3	53.542	7.1331	27.3745	27.7129	27.9814	27.5609	24.9987	27.632	NaN	27.5463	NaN	NaN	27.7389	27.524
	0.502567	-0.954299	O94919	Endonuclease domain-containing 1 protein	ENDOD1	6	6	20.4	55.016	54.979	27.2535	27.4314	27.4629	24.7792	27.3745	27.1312	NaN	NaN	NaN	NaN	NaN	NaN
	0.847312	-0.95228	O60287	Nucleolar pre-ribosomal-associated protein 1	URB1	11	11	8.1	254.39	15.931	27.189	26.8974	26.976	26.6865	25.0467	26.4723	26.8974	26.3477	26.7389	NaN	NaN	26.6865
	1.03427	-0.944312	Q96BH1	E3 ubiquitin-protein ligase RNF25	RNF25	5	5	18.7	51.218	19.567	27.4473	27.217	27.1984	26.7645	26.7645	25.5007	27.0609	27.1984	27.189	NaN	NaN	26.341
	1.21332	-0.932643	Q9P270	SLAIN motif-containing protein 2	SLAIN2	10	10	20.7	62.543	49.022	27.0813	27.3662	27.2714	26.6435	25.6045	26.673	26.9088	NaN	27.2803	NaN	NaN	NaN
	1.12214	-0.914933	Q5M775	Cytospin-B	SPECC1	6	6	9.6	118.58	13.863	26.3778	26.3943	26.2944	25.8118	25.8336	24.6763	NaN	NaN	NaN	NaN	NaN	NaN
	2.79445	-0.901285	Q9ULT8	E3 ubiquitin-protein ligase HECTD1	HECTD1	28	28	19.5	289.38	144.09	29.2647	29.158	29.217	28.1164	28.5128	28.3066	29.1984	29.0609	29.4649	27.6595	27.976	27.8916
	0.73044	-0.897327	Q9BV44	THUMP domain-containing protein 3	THUMPD3	6	6	18.7	57.002	25.664	27.6798	27.7129	27.6458	25.6652	27.2262	27.4551	NaN	NaN	26.8623	NaN	NaN	NaN
	1.03981	-0.894219	P49247	Ribose-5-phosphate isomerase	RPIA	5	5	27	33.269	92.944	26.673	26.6458	26.239	26.3723	25.1436	25.3593	NaN	26.1293	NaN	NaN	NaN	NaN
	1.10701	-0.889872	Q9UGR2	Zinc finger CCCH domain-containing protein 7B	ZC3H7B	5	4	7.4	109.86	7.0129	26.217	26.4999	26.604	26.2225	24.9913	25.4375	NaN	NaN	26.3877	NaN	NaN	26.0772
	1.62328	-0.884296	Q9UPN4	Centrosomal protein of 131 kDa	CEP131	5	5	7.1	122.15	47.251	25.9869	26.4089	25.8069	25.4226	25.2821	24.8451	NaN	NaN	26.1681	NaN	NaN	NaN
	0.404967	-0.881625	Q12805	EGF-containing fibulin-like extracellular matrix protein 1	EFEMP1	5	5	17.2	54.64	32.788	26.9539	28.6561	27.341	26.3695	28.249	25.6876	NaN	NaN	NaN	NaN	NaN	NaN
	0.44986	-0.872471	Q9NP61	ADP-ribosylation factor GTPase-activating protein 3	ARFGAP3	8	7	22.7	56.928	20.888	27.3494	27.3494	27.3153	24.8018	27.4154	27.1795	NaN	NaN	NaN	NaN	NaN	NaN
	1.01771	-0.868303	O75179	Ankyrin repeat domain-containing protein 17	ANKRD17	20	14	13.5	274.25	89.739	28.8355	28.2625	28.4707	27.8799	28.141	26.9428	28.2123	28.2399	28.2714	26.9977	27.8564	26.5609
	0.649107	-0.856115	O00311	Cell division cycle 7-related protein kinase	CDC7	5	5	13.2	63.887	39.473	27.1507	27.5463	26.9539	26.8264	27.0296	25.2266	NaN	NaN	NaN	NaN	NaN	NaN
	0.624043	-0.848947	Q15398	Disks large-associated protein 5	DLGAP5	6	6	12.8	95.114	48.287	26.4346	26.3629	26.3101	24.2992	26.0935	26.1681	NaN	NaN	NaN	NaN	NaN	NaN
	0.448927	-0.846325	Q96G61;Q8NFP7	Diphosphoinositol polyphosphate phosphohydrolase 3-beta;Diphosphoinositol polyphosphate phosphohydrolase 3-alpha	NUDT11;NUDT10	3	3	28	18.559	8.3272	27.3745	27.5014	27.3324	24.9378	27.3324	27.3992	NaN	NaN	NaN	NaN	NaN	NaN
	0.456094	-0.826668	Q9BVP2	Guanine nucleotide-binding protein-like 3	GNL3	8	8	18	61.992	11.904	27.8142	27.3239	27.4154	27.7064	27.1795	25.1876	NaN	NaN	NaN	NaN	NaN	NaN
	0.411221	-0.826517	O95071	E3 ubiquitin-protein ligase UBR5	UBR5	15	15	8.3	309.35	50.072	27.5898	27.3578	27.6527	27.4707	25.0111	27.6389	27.391	27.7517	27.3578	27.5165	NaN	27.1015
	0.44914	-0.8228	O75223	Gamma-glutamylcyclotransferase	GGCT	6	6	46.3	21.007	6.4014	27.6998	27.5682	27.4862	27.673	25.1973	27.4154	27.141	27.4473	27.2077	27.4551	27.2891	27.1984
	0.78788	-0.814686	Q9UHD2	Serine/threonine-protein kinase TBK1	TBK1	7	7	17.7	83.641	45.144	26.9316	27.019	26.7645	25.1483	26.533	26.5898	27.1015	27.2262	27.217	27.4473	27.141	26.7771
	0.428513	-0.809088	P16403	Histone H1.2	HIST1H1C	10	3	27.7	21.364	10.635	30.6372	27.9814	29.7958	28.3704	28.5898	29.027	NaN	28.7833	NaN	32.7068	32.08	29.9677
	1.17282	-0.805045	Q53EP0	Fibronectin type III domain-containing protein 3B	FNDC3B	17	17	23.8	132.89	91.564	29.5426	29.7958	30.1483	28.4823	29.2979	29.2913	27.8741	28.6146	29.0737	NaN	27.3828	28.3828
	0.288024	-0.799912	Q12849	G-rich sequence factor 1	GRSF1	7	7	23.1	53.126	25.376	27.509	27.5682	27.5826	27.976	24.5133	27.7708	27.4862	27.7453	27.8142	27.5969	27.8623	27.7453
	0.845221	-0.789269	Q8ND04	Protein SMG8	SMG8	6	6	10.2	109.68	10.556	26.3049	26.6865	26.7517	26.1391	24.9737	26.2625	26.0148	26.2077	26.4488	NaN	26.0955	NaN
	0.405036	-0.786574	Q9NUQ7	Ufm1-specific protease 2	UFSP2	9	9	35.4	53.261	19.713	27.7195	27.2077	27.7708	27.7325	27.4234	25.1823	27.6663	27.9031	27.9088	NaN	27.9259	27.7708
	0.218786	-0.777933	P17252	Protein kinase C alpha type	PRKCA	15	15	35.9	76.749	54.778	27.4629	29.5718	29.4354	25.6348	29.2147	29.2869	25.9738	26.0854	24.7846	NaN	25.3811	26.1757
	0.874824	-0.777634	Q9NPQ8	Synembryn-A	RIC8A	15	14	36.3	59.709	37.901	27.6865	27.7645	27.4862	26.0813	27.4314	27.0914	29.1459	29.3599	29.2714	28.1115	28.4394	29.2262
	0.520478	-0.769412	P53350	Serine/threonine-protein kinase PLK1	PLK1	4	4	11.6	68.254	7.7094	26.6998	26.7895	26.7895	26.6595	26.6181	24.6931	26.2856	26.5285	26.7389	NaN	NaN	NaN
	0.336064	-0.769407	Q4VC31	Coiled-coil domain-containing protein 58	CCDC58	2	2	19.4	16.62	3.8784	27.2891	27.2262	26.9316	27.5969	27.0084	24.5334	NaN	NaN	NaN	NaN	NaN	27.189
	1.14978	-0.760838	O14965	Aurora kinase A	AURKA	9	8	36.7	45.809	18.616	27.611	28.0453	28.6285	27.3578	27.1507	27.4938	NaN	NaN	NaN	NaN	NaN	NaN
	0.257208	-0.753054	Q03135;P56539	Caveolin-1;Caveolin-3	CAV1;CAV3	2	2	17.4	20.471	8.9153	26.5638	28.4113	28.6146	25.1887	27.9203	28.2216	NaN	NaN	NaN	NaN	NaN	NaN
	0.760556	-0.741702	Q15043	Zinc transporter ZIP14	SLC39A14	3	3	9.1	54.212	112.89	26.5898	27.2262	26.726	25.976	26.8623	25.4786	26.2909	26.4969	26.5682	NaN	NaN	NaN
	0.376096	-0.737439	P61966	AP-1 complex subunit sigma-1A	AP1S1	3	2	19.6	18.733	151.7	27.1604	26.6865	26.6458	27.1507	24.5115	26.6181	27.6181	27.7833	27.6595	NaN	27.4862	27.6998
	0.889386	-0.736253	Q9H2U1	ATP-dependent RNA helicase DHX36	DHX36	6	6	9.6	114.76	6.9546	26.1035	25.9606	27.1492	25.7846	25.4862	25.7338	NaN	NaN	NaN	NaN	NaN	NaN
	1.51947	-0.733966	Q9UBB6	Neurochondrin	NCDN	14	14	29.5	78.863	27.861	26.8974	26.8974	27.1604	26.6595	26.0815	26.0122	27.7517	27.7645	27.5165	27.6998	27.1312	26.976
	3.38329	-0.731222	Q9UG63	ATP-binding cassette sub-family F member 2	ABCF2	17	17	29.5	71.289	53.591	30.2193	30.196	30.1604	29.5536	29.4938	29.3346	29.8127	29.5296	30.1361	NaN	28.2077	29.2979
	0.306707	-0.729647	P25325	3-mercaptopyruvate sulfurtransferase	MPST	6	6	33	33.178	20.128	27.8682	27.4785	27.9428	27.965	25.1165	28.019	27.8564	27.6389	27.611	28.0711	27.9484	27.9259
	0.17131	-0.726664	P15428	15-hydroxyprostaglandin dehydrogenase [NAD(+)]	HPGD	8	8	41.7	28.977	34.168	29.94	28.189	26.7517	29.6646	27.8858	25.1504	27.8081	27.6595	29.6285	27.17	27.9088	29.3239
	0.410859	-0.721614	A6NDG6	Phosphoglycolate phosphatase	PGP	5	5	21.2	34.006	10.25	28.2216	28.4113	28.4746	28.2216	26.1748	28.5463	28.2847	28.4354	28.4234	28.7927	28.7129	28.2847
	0.339505	-0.719241	Q9HC52	Chromobox protein homolog 8	CBX8	5	5	22.4	43.395	59.232	27.3578	27.2262	27.5165	24.9066	27.4394	27.5969	27.1795	26.7389	26.7771	NaN	27.5389	27.5754
	0.563294	-0.715887	Q93063	Exostosin-2	EXT2	3	3	8.9	82.254	9.2806	26.1174	26.2463	26.2768	25.2015	26.5849	24.7063	25.9271	NaN	26.5404	NaN	NaN	26.976
	0.509298	-0.712777	Q68EM7	Rho GTPase-activating protein 17	ARHGAP17	9	9	21.7	95.436	28.515	27.3992	27.6663	27.6595	27.141	27.7453	25.7002	NaN	27.2979	27.4473	27.391	NaN	27.1984
	0.355324	-0.705392	Q9Y2R5	28S ribosomal protein S17, mitochondrial	MRPS17	2	2	29.2	14.502	12.724	28.4032	28.141	28.3494	28.55	28.2714	25.9561	28.0762	27.9539	28.203	28.4473	28.3662	28.7864
	0.429054	-0.703629	P43304	Glycerol-3-phosphate dehydrogenase, mitochondrial	GPD2	10	10	21.9	80.852	24.607	26.6595	26.7517	26.3427	26.5522	26.5898	24.5011	27.0505	27.141	27.611	27.7833	27.3662	27.8799
	0.392758	-0.700384	Q9NR56	Muscleblind-like protein 1	MBNL1	5	3	19.6	41.817	27.524	27.6663	27.632	27.391	25.3695	27.6798	27.5389	27.5014	NaN	27.6181	NaN	NaN	NaN
	0.559099	-0.70037	P18065	Insulin-like growth factor-binding protein 2	IGFBP2	9	9	45.5	34.814	30.941	28.2216	29.0788	29.5426	27.4707	28.4785	28.7927	NaN	NaN	NaN	NaN	NaN	NaN
	0.450836	-0.690293	P57081	tRNA (guanine-N(7)-)-methyltransferase non-catalytic subunit WDR4	WDR4	3	3	14.8	45.489	15.694	26.673	26.6181	26.3477	26.512	24.553	26.5029	26.1984	NaN	26.1642	NaN	NaN	26.2481
	1.95737	-0.689393	Q13501	Sequestosome-1	SQSTM1	15	15	63.4	47.687	323.31	32.3879	32.5458	32.3672	31.7088	32.0084	31.5156	30.7533	30.7292	31.2479	27.5463	28.6216	29.4433
	2.58745	-0.688183	O75153	Clustered mitochondria protein homolog	CLUH	18	18	23.1	146.67	61.403	28.3578	28.5862	28.6285	27.9539	27.7833	27.7708	28.0296	27.9372	27.9428	27.5536	NaN	NaN
	0.330348	-0.684409	Q15007	Pre-mRNA-splicing regulator WTAP	WTAP	5	5	19.4	44.243	116.89	27.0401	26.9088	27.4394	27.4785	24.7855	27.0711	NaN	NaN	NaN	NaN	NaN	NaN
	0.966613	-0.671046	O43310	CBP80/20-dependent translation initiation factor	CTIF	4	4	9.7	67.586	16.197	26.5404	26.9428	27.1507	25.848	26.0338	26.7389	NaN	NaN	25.8385	NaN	NaN	NaN
	1.99118	-0.663801	O43318	Mitogen-activated protein kinase kinase kinase 7	MAP3K7	7	7	18.2	67.195	63.117	26.5522	26.6998	26.6458	25.705	26.1738	26.0275	NaN	NaN	25.9383	NaN	NaN	NaN
	0.611511	-0.650593	Q9UHI8	A disintegrin and metalloproteinase with thrombospondin motifs 1	ADAMTS1	7	7	13.1	105.36	76.01	26.1293	26.9316	27.2262	25.4272	26.5536	26.3545	NaN	NaN	NaN	NaN	NaN	NaN
	1.11796	-0.649467	P31350	Ribonucleoside-diphosphate reductase subunit M2	RRM2	21	18	59.6	44.877	113.94	31.4919	31.2077	31.0217	31.0609	30.4032	30.3088	31.0217	30.947	31.5618	26.8623	28.6764	29.461
	0.47067	-0.63717	Q9BUK6	Protein misato homolog 1	MSTO1	4	4	15.1	61.835	9.206	26.7517	26.6595	26.8264	24.9399	26.6865	26.6998	NaN	NaN	NaN	NaN	NaN	NaN
	0.362361	-0.636478	Q99439	Calponin-2	CNN2	14	13	63.4	33.697	65.615	30.1842	30.8682	30.9882	28.6697	30.6458	30.8157	27.7958	27.5682	30.1842	28.0137	28.3324	30.196
	0.578673	-0.634095	Q6ZRS2	Helicase SRCAP	SRCAP	7	7	4.1	343.55	20.849	27.1115	27.0711	26.9539	27.0401	25.4552	26.7389	26.6595	NaN	26.5522	NaN	NaN	NaN
	0.333446	-0.632367	Q96GX9	Methylthioribulose-1-phosphate dehydratase	APIP	5	5	28.1	27.125	9.8028	27.9088	27.9146	27.7958	28.0243	28.019	25.6787	28.0084	27.8858	27.7453	28.0914	28.2077	27.9203
	0.29562	-0.628934	O00411	DNA-directed RNA polymerase, mitochondrial	POLRMT	9	9	13.5	138.62	14.76	26.7645	26.228	26.5075	26.9203	24.1915	26.5014	NaN	26.5225	26.7129	NaN	NaN	26.7895
	0.42425	-0.624974	Q13769	THO complex subunit 5 homolog	THOC5	6	6	16.7	78.507	18.526	27.5014	27.2262	27.5969	27.4473	25.5789	27.4234	NaN	26.5448	NaN	NaN	26.9316	26.9088
	0.992881	-0.623753	P29373	Cellular retinoic acid-binding protein 2	CRABP2	7	7	46.4	15.693	70.728	30.7047	31.1177	31.2869	29.94	30.5933	30.7047	NaN	NaN	NaN	NaN	NaN	NaN
	1.71104	-0.622388	Q9NSY1	BMP-2-inducible protein kinase	BMP2K	15	14	23.6	129.17	110.32	27.9923	28.4629	28.459	27.5826	27.7581	27.7064	28.0711	27.9031	28.4433	NaN	26.1391	NaN
	1.89782	-0.621208	O75534	Cold shock domain-containing protein E1	CSDE1	23	23	34.6	88.884	221.17	29.9539	30.2979	30.1361	29.3807	29.7162	29.4274	29.1866	29.1115	29.0711	26.726	28.2625	28.1312
	3.66645	-0.620622	Q9H2J4	Phosducin-like protein 3	PDCL3	6	6	41.4	27.614	11.955	27.6251	27.673	27.6798	27.1214	26.965	27.0296	26.9428	27.2625	27.726	NaN	26.329	26.6458
	0.308112	-0.620529	Q8WVJ2	NudC domain-containing protein 2	NUDCD2	4	4	42	17.676	21.387	28.0084	27.5463	27.4551	28.1065	25.4735	27.5682	27.7064	27.2714	27.5609	27.2714	26.4154	27.2077
	0.923498	-0.618971	P05783	Keratin, type I cytoskeletal 18	KRT18	5	4	17.4	48.057	9.6366	26.1155	26.8264	26.9088	25.6403	26.0874	26.2661	NaN	NaN	NaN	NaN	NaN	NaN
	0.544687	-0.609045	Q9NYJ1	Cytochrome c oxidase assembly factor 4 homolog, mitochondrial	COA4	6	6	78.2	10.134	39.186	27.5463	27.4394	27.341	27.4785	27.1507	25.8703	27.6181	NaN	27.9316	NaN	27.2535	27.3239
	0.657207	-0.606085	Q96EL3	39S ribosomal protein L53, mitochondrial	MRPL53	4	4	50	12.107	9.3935	26.7645	26.3545	26.604	25.8118	25.3669	26.726	26.7645	26.8385	NaN	27.5389	27.2979	27.1312
	2.50776	-0.603904	Q86XZ4	Spermatogenesis-associated serine-rich protein 2	SPATS2	9	9	29	59.544	115	29.9677	29.8974	29.8814	29.2007	29.4919	29.2422	30.1483	29.8081	29.8309	NaN	29.158	29.2353
	0.66685	-0.60254	P18074	TFIIH basal transcription factor complex helicase XPD subunit	ERCC2	5	5	10	86.908	13.414	26.3844	26.4862	26.2535	26.5045	25.7023	25.1097	NaN	NaN	NaN	NaN	26.604	26.4567
	0.808674	-0.599728	P25098	Beta-adrenergic receptor kinase 1	ADRBK1	8	8	15.4	79.573	17.451	27.1984	27.4154	27.2979	26.0384	27.1312	26.9428	27.0084	27.0505	26.8264	NaN	NaN	NaN
	0.662578	-0.591036	Q15942	Zyxin	ZYX	23	23	64.9	61.277	323.31	32.7573	33.3828	33.6629	32.0832	32.8682	33.0785	31.7692	31.7373	32.8215	31.2193	31.362	32.08
	0.551597	-0.590584	P49840	Glycogen synthase kinase-3 alpha	GSK3A	5	5	20.5	50.98	78.428	26.9977	26.965	27.1795	27.0505	26.7895	25.5303	27.0401	27.2262	27.2445	NaN	NaN	26.673
	0.749103	-0.587935	Q12841	Follistatin-related protein 1	FSTL1	10	10	39.3	34.985	257.62	28.5718	29.4354	28.9344	27.9203	28.8142	28.4433	27.141	27.1604	27.141	NaN	26.7517	NaN
	0.476359	-0.586744	O43294	Transforming growth factor beta-1-induced transcript 1 protein	TGFB1I1	11	11	37.7	49.814	59.161	29.9677	30.4629	30.846	29.0762	29.7437	30.6964	28.4823	27.4314	29.4551	26.8264	26.7129	NaN
	0.366789	-0.584967	Q9Y399	28S ribosomal protein S2, mitochondrial	MRPS2	6	6	32.1	33.249	21.247	27.5682	27.4707	27.5682	27.7389	25.6271	27.4862	27.6527	27.5389	27.8682	NaN	27.9031	28.17
	2.19807	-0.580856	Q8WWM7	Ataxin-2-like protein	ATXN2L	22	22	38.3	113.37	113.36	29.9677	29.9117	29.6337	29.326	29.258	29.1866	29.0914	28.7549	29.2077	27.7064	28.4668	27.509
	1.55374	-0.575719	Q9Y5T5	Ubiquitin carboxyl-terminal hydrolase 16	USP16	6	6	11.2	93.569	12.424	26.4969	26.6595	26.9428	26.0914	25.9515	26.329	NaN	NaN	NaN	NaN	NaN	NaN
	0.16667	-0.572865	Q09666	Neuroblast differentiation-associated protein AHNAK	AHNAK	119	119	43.9	629.09	323.31	30.7533	32.9539	33.1544	29.6285	32.7433	32.7712	26.673	26.0275	29.94	28.5463	27.1604	30.341
	1.68411	-0.570377	P04818	Thymidylate synthase	TYMS	7	7	39.3	35.716	19.487	28.9869	28.6561	28.7988	28.4394	28.0243	28.267	27.6931	27.604	28.0137	NaN	NaN	NaN
	0.284017	-0.562639	Q9H8Y8	Golgi reassembly-stacking protein 2	GORASP2	9	9	35	47.145	70.188	28.217	28.6458	28.8081	28.6389	26.4438	28.9002	29.6981	29.5109	29.4862	29.1556	29.4919	29.7211
	0.465827	-0.555416	P47895	Aldehyde dehydrogenase family 1 member A3	ALDH1A3	5	4	12.9	56.108	6.0917	25.9361	26.0296	26.5898	24.6831	26.0729	26.1332	NaN	NaN	NaN	NaN	NaN	NaN
	4.31066	-0.553858	P40222	Alpha-taxilin	TXLNA	21	21	52.2	61.89	269.3	31.0217	31.015	30.9539	30.4823	30.4334	30.4134	30.7849	30.7129	30.9117	30.1604	29.8887	29.9677
	1.20114	-0.553768	Q13438	Protein OS-9	OS9	4	4	9.6	75.561	6.6163	25.7771	26.0732	25.9628	25.1252	25.7745	25.2519	NaN	NaN	25.989	NaN	NaN	NaN
	0.620186	-0.548454	Q9UET6	Putative tRNA (cytidine(32)/guanosine(34)-2-O)-methyltransferase	FTSJ1	2	2	10.9	36.079	4.7642	25.7492	26.0212	25.8312	25.6431	24.5436	25.7695	NaN	NaN	NaN	NaN	NaN	NaN
	0.818167	-0.54671	Q9UPT9;A6NNY8	Ubiquitin carboxyl-terminal hydrolase 22;Ubiquitin carboxyl-terminal hydrolase 27	USP22;USP27X	4	4	14.3	59.96	11.704	26.7645	26.3118	26.726	25.9361	25.6506	26.5754	NaN	NaN	NaN	NaN	NaN	NaN
	0.743088	-0.541892	Q8WX93	Palladin	PALLD	15	15	22	150.56	108.56	28.2759	29.0084	28.9231	27.7195	28.3494	28.5128	28.0864	27.9146	29.3324	NaN	26.9869	28.4032
	0.563201	-0.539708	P25942	Tumor necrosis factor receptor superfamily member 5	CD40	3	3	20.6	30.619	12.747	26.7771	26.9428	26.8142	25.6	26.2541	27.0609	NaN	NaN	NaN	NaN	NaN	NaN
	0.700251	-0.536531	Q6P996	Pyridoxal-dependent decarboxylase domain-containing protein 1	PDXDC1	23	23	48.5	86.706	76.032	27.3745	27.9814	28.4314	27.2979	27.1604	27.7195	29.5052	30.0084	29.8974	27.7325	29.0839	29.1532
	1.31639	-0.524151	Q13685	Angio-associated migratory cell protein	AAMP	4	4	12.7	46.75	6.1322	27.0505	27.4234	27.6389	26.8385	26.726	26.976	NaN	NaN	NaN	NaN	NaN	NaN
	1.46645	-0.524071	Q9P0P0	E3 ubiquitin-protein ligase RNF181	RNF181	2	2	26.8	17.909	54.726	26.604	26.8142	26.4923	26.1795	26.3083	25.8504	26.1015	26.0443	26.4645	25.8858	NaN	25.8623
	0.265488	-0.521348	P21580	Tumor necrosis factor alpha-induced protein 3;A20p50;A20p37	TNFAIP3	10	10	24.1	89.613	18.058	27.8564	28.1065	27.5536	27.9146	28.2445	25.7934	NaN	NaN	NaN	NaN	NaN	NaN
	0.928836	-0.520384	P35222	Catenin beta-1	CTNNB1	14	11	28.9	85.496	39.159	28.066	28.4433	27.9372	27.2445	27.6595	27.9814	28.7031	28.8799	28.5389	28.362	28.5898	29.0401
	1.35109	-0.518434	Q71RC2	La-related protein 4	LARP4	5	5	13.4	80.595	9.9312	26.527	27.1015	26.9088	26.4386	26.2299	26.3135	25.9338	NaN	NaN	NaN	NaN	NaN
	0.291961	-0.515994	Q14764	Major vault protein	MVP	21	21	33.3	99.326	62.956	26.8142	27.4629	28.0296	25.7686	27.9088	27.0813	30.4919	30.4727	29.8203	30.2193	30.1724	29.6881
	0.958589	-0.513794	P98082	Disabled homolog 2	DAB2	12	12	30.3	82.447	93.415	29.3971	30.0084	29.7958	28.8799	29.4668	29.3131	NaN	NaN	27.8741	NaN	NaN	NaN
	1.68171	-0.508244	Q86VY4	Testis-specific Y-encoded-like protein 5	TSPYL5	7	7	30.9	45.143	73.958	29.1263	29.3557	29.0505	28.4746	28.8203	28.7129	27.6931	27.2445	27.8081	NaN	NaN	26.9869
	0.345576	-0.502768	Q9UNN8	Endothelial protein C receptor	PROCR	3	3	15.1	26.671	6.2344	26.7517	27.0401	26.7895	26.9977	25.1666	26.9088	27.341	27.17	27.0296	NaN	NaN	26.4738
	0.434603	-0.502101	Q9BSV6	tRNA-splicing endonuclease subunit Sen34	TSEN34	2	2	8.1	33.652	1.8782	26.204	25.8264	26.3679	24.7093	25.9473	26.2353	NaN	NaN	NaN	NaN	NaN	NaN
	0.610878	-0.500041	Q7Z417	Nuclear fragile X mental retardation-interacting protein 2	NUFIP2	7	7	17.6	76.12	18.149	27.2445	26.6181	26.726	26.8385	26.4754	25.7745	27.0609	26.9088	27.0401	NaN	NaN	NaN
	0.384551	-0.499905	Q15397	Pumilio domain-containing protein KIAA0020	KIAA0020	9	9	16	73.584	9.8331	26.6595	26.2732	26.2499	26.4598	26.3894	24.8337	NaN	25.9338	26.4551	NaN	26.8019	26.4551
	0.61514	-0.496813	Q9UPN9	E3 ubiquitin-protein ligase TRIM33	TRIM33	5	5	5.9	122.53	11.835	26.5045	26.632	26.4346	25.3269	26.2463	26.5075	NaN	NaN	NaN	NaN	26.0233	NaN
	0.952051	-0.496563	Q14684	Ribosomal RNA processing protein 1 homolog B	RRP1B	14	14	26	84.427	54.653	28.6561	28.1263	28.019	28.0557	27.5898	27.6663	NaN	NaN	25.9271	NaN	NaN	NaN
	1.73427	-0.49308	Q9BX40	Protein LSM14 homolog B	LSM14B	6	6	35.1	42.07	234.05	28.6389	28.995	28.7581	28.1652	28.4194	28.3282	28.2625	28.0813	28.6389	NaN	NaN	27.7325
	0.376302	-0.491562	Q92625	Ankyrin repeat and SAM domain-containing protein 1A	ANKS1A	7	7	11.5	123.11	17.578	25.792	25.848	25.9606	25.8336	26.0041	24.2882	26.7771	26.1488	26.3745	NaN	NaN	NaN
	1.49435	-0.49018	Q96F86	Enhancer of mRNA-decapping protein 3	EDC3	5	5	18.7	56.077	46.314	27.341	27.3324	27.7895	26.9869	26.976	27.0296	26.632	26.2821	26.2481	NaN	25.5463	NaN
	0.311817	-0.489246	O43402	ER membrane protein complex subunit 8	EMC8	4	4	25.7	23.773	8.878	27.9484	27.5826	27.7645	28.0084	26.0174	27.8019	27.8019	27.8203	27.8385	NaN	NaN	NaN
	0.220932	-0.488908	Q9H425	Uncharacterized protein C1orf198	C1orf198	9	9	39.1	36.346	55.119	28.5203	29.6764	29.0349	26.9977	29.4093	29.3578	NaN	NaN	NaN	NaN	NaN	NaN
	0.31751	-0.48322	Q14331	Protein FRG1	FRG1	3	3	15.9	29.172	7.0279	27.4785	27.4707	27.6931	27.6865	25.8264	27.6798	27.6251	NaN	27.7453	27.4551	27.8916	27.7833
	0.237814	-0.482544	Q9BZE4	Nucleolar GTP-binding protein 1	GTPBP4	15	15	31.9	73.964	37.675	28.7549	27.2353	27.9203	28.4707	27.7771	26.2151	27.4938	28.066	28.1312	28.4032	28.8019	28.5718
	0.333738	-0.481929	Q9H8W4	Pleckstrin homology domain-containing family F member 2	PLEKHF2	2	2	11.6	27.797	4.4861	26.3066	26.3975	26.632	26.4661	24.7923	26.632	NaN	NaN	NaN	NaN	NaN	NaN
	1.68814	-0.480491	Q7Z3T8	Zinc finger FYVE domain-containing protein 16	ZFYVE16	19	19	21.4	168.9	96.897	28.5426	28.877	28.8711	28.391	28.2979	28.1604	28.6931	28.7739	29.1913	NaN	26.7895	28.217
	2.09018	-0.480052	P55010	Eukaryotic translation initiation factor 5	EIF5	12	12	28.3	49.222	59.636	30.5014	30.611	30.6198	30.0349	30.2759	29.9814	29.9259	30.0217	30.1724	29.1386	29.49	29.5808
	1.63472	-0.473109	O96007	Molybdopterin synthase catalytic subunit	MOCS2	7	7	44.1	20.944	15.501	27.7708	27.8916	27.8385	27.141	27.5826	27.3578	27.3066	27.2445	27.8081	NaN	NaN	27.1507
	1.41124	-0.469135	Q6EEV4	DNA-directed RNA polymerase II subunit GRINL1A, isoforms 4/5	POLR2M	3	3	42.6	15.131	99.843	27.0609	27.141	27.1115	26.3959	26.9203	26.5898	25.9406	NaN	25.9955	NaN	NaN	NaN
	0.812021	-0.462303	P62256	Ubiquitin-conjugating enzyme E2 H	UBE2H	3	3	21.9	20.655	8.1581	26.1565	26.6595	26.5433	25.6458	25.9406	26.3861	26.3712	26.0732	26.5315	NaN	NaN	NaN
	0.372542	-0.460887	Q9P032	NADH dehydrogenase [ubiquinone] 1 alpha subcomplex assembly factor 4	NDUFAF4	3	3	22.9	20.266	6.2071	26.7129	26.9316	26.9428	26.8142	25.382	27.0084	25.433	NaN	NaN	NaN	NaN	NaN
	1.65821	-0.458367	P62993	Growth factor receptor-bound protein 2	GRB2	7	7	34.1	25.206	34.742	29.0813	29.2602	29.0686	28.7927	28.7833	28.459	28.6355	28.4194	28.3324	NaN	27.9316	28.0084
	1.13078	-0.456161	Q8WUP2	Filamin-binding LIM protein 1	FBLIM1	12	12	37.3	40.669	69.638	29.8519	29.9117	30.2869	29.2979	29.668	29.7162	29.2979	29.3196	29.893	29.2445	29.393	29.8188
	2.429	-0.455056	P55789	FAD-linked sulfhydryl oxidase ALR	GFER	4	4	25.4	23.449	150.12	26.6458	26.425	26.4266	26.0752	26.0254	26.0317	27.1507	27.3578	27.0914	27.6865	27.3745	27.2891
	0.518972	-0.451941	Q14651	Plastin-1	PLS1	20	17	44.8	70.253	151.15	30.1239	30.8901	31.015	29.7178	30.362	30.5933	27.4234	27.9484	28.9705	27.7581	26.5135	28.1312
	1.48101	-0.449451	Q92974	Rho guanine nucleotide exchange factor 2	ARHGEF2	20	20	28.6	111.54	128.97	30.2869	30.1483	29.995	29.7802	29.8309	29.4707	29.3848	29.6022	29.632	NaN	28.8858	29.0634
	0.499396	-0.449296	Q9Y5Q8	General transcription factor 3C polypeptide 5	GTF3C5	7	7	20	59.57	10.007	27.2625	27.2625	27.3992	27.2803	26.079	27.217	26.976	NaN	27.2535	NaN	NaN	NaN
	1.63621	-0.44492	Q13158	FAS-associated death domain protein	FADD	4	4	31.7	23.279	105.16	28.9814	28.8799	28.7421	28.217	28.5203	28.5315	28.2399	28.3494	28.1556	NaN	28.8974	27.5315
	0.241302	-0.439042	O60831	PRA1 family protein 2	PRAF2	3	3	23	19.258	9.2194	27.019	26.9316	27.0296	27.3066	25.1211	27.2353	27.6389	27.8741	27.8264	NaN	27.7389	27.611
	0.578284	-0.430817	P48681	Nestin	NES	68	68	52.9	177.44	323.31	33.6839	34.2408	34.4083	33.1857	33.87	33.9848	NaN	NaN	26.8741	NaN	NaN	NaN
	0.693547	-0.429634	Q99615	DnaJ homolog subfamily C member 7	DNAJC7	14	14	34.2	56.44	32.443	28.8741	28.6764	28.1015	28.4314	28.0401	27.8916	27.5536	26.1174	27.9977	NaN	26.3629	26.9977
	2.26267	-0.428194	P31689	DnaJ homolog subfamily A member 1	DNAJA1	12	12	40.6	44.868	78.03	31.2814	31.4678	31.2869	30.94	30.9882	30.8234	30.6285	30.7692	30.94	30.2193	30.0737	30.1115
	1.12791	-0.427117	Q14978	Nucleolar and coiled-body phosphoprotein 1	NOLC1	7	7	11.2	73.602	7.9404	28.5165	28.0296	28.5898	28.0084	27.9203	27.9259	NaN	NaN	NaN	NaN	NaN	NaN
	0.798021	-0.425484	Q8N0X7	Spartin	SPG20	10	10	24.3	72.832	39.62	28.8264	28.4823	28.0965	28.0914	28.2353	27.8019	28.4512	27.8858	28.7031	27.4073	27.7581	NaN
	0.208891	-0.424395	Q9H446	RWD domain-containing protein 1	RWDD1	3	3	23.9	27.939	7.7638	26.452	26.5898	26.4862	27.0296	26.6998	24.5254	NaN	NaN	NaN	NaN	NaN	NaN
	1.24113	-0.423602	O95801	Tetratricopeptide repeat protein 4	TTC4	7	7	32.8	44.678	43.516	28.0401	28.0349	28.341	27.9595	27.632	27.5536	27.3239	NaN	27.632	NaN	27.2445	27.4394
	1.32013	-0.420756	Q16763	Ubiquitin-conjugating enzyme E2 S	UBE2S	6	5	45.5	23.845	40.757	27.5826	27.2625	27.2262	27.0813	26.976	26.7517	27.0296	26.673	26.7389	NaN	NaN	NaN
	0.298432	-0.418283	O14893	Gem-associated protein 2	GEMIN2	5	5	26.8	31.585	10.022	27.217	26.8858	27.0084	27.217	27.141	25.4983	NaN	NaN	NaN	NaN	NaN	NaN
	1.43868	-0.418271	Q9Y5A9	YTH domain-containing family protein 2	YTHDF2	9	7	20	62.333	23.881	29.0003	28.805	28.8173	28.5718	28.579	28.217	27.9428	28.3828	28.2759	NaN	27.3745	NaN
	1.91188	-0.41775	Q13309	S-phase kinase-associated protein 2	SKP2	4	4	13.9	47.76	8.7437	27.3066	27.5463	27.524	26.9316	27.0609	27.1312	NaN	NaN	NaN	NaN	NaN	NaN
	0.614849	-0.416578	Q5VTL8	Pre-mRNA-splicing factor 38B	PRPF38B	5	5	15	64.467	39.967	26.3204	26.6458	26.1273	25.55	26.4473	25.8466	NaN	NaN	NaN	NaN	NaN	NaN
	0.693151	-0.414813	Q96HC4	PDZ and LIM domain protein 5	PDLIM5	16	16	37.4	63.944	176.93	29.0479	29.5664	29.4214	28.5014	29.2602	29.0296	28.4234	28.6629	29.3787	NaN	NaN	28.9787
	1.16821	-0.414759	O75940	Survival of motor neuron-related-splicing factor 30	SMNDC1	4	4	33.2	26.711	28.025	28.6998	28.7581	28.249	28.0762	28.1556	28.2308	NaN	NaN	27.7958	NaN	NaN	NaN
	0.498879	-0.413457	Q9BTY2	Plasma alpha-L-fucosidase	FUCA2	3	3	7.3	54.066	4.4785	25.792	26.0127	26.341	25.9738	24.9855	25.946	NaN	NaN	NaN	NaN	NaN	NaN
	0.71506	-0.413083	Q9NPD8	Ubiquitin-conjugating enzyme E2 T	UBE2T	5	5	30.5	22.521	88.571	28.9146	28.3662	28.7988	28.3828	27.8858	28.5718	27.7895	27.8445	27.673	NaN	27.2625	26.9869
	0.706454	-0.412992	Q9UJX3	Anaphase-promoting complex subunit 7	ANAPC7	16	16	38.7	66.855	31.853	28.1312	28.2891	27.6458	27.9031	27.2714	27.6527	27.4938	NaN	27.509	27.0505	27.2979	27.1115
	2.85498	-0.411247	P20290	Transcription factor BTF3	BTF3	7	7	51	22.168	323.31	31.13	31.0609	30.995	30.6458	30.7129	30.5933	30.6881	30.4919	30.6881	30.2535	29.7195	30.0609
	1.52978	-0.410745	O14530	Thioredoxin domain-containing protein 9	TXNDC9	5	5	28.8	26.534	44.932	27.0711	27.1984	27.1604	26.4969	26.8623	26.8385	26.673	26.8142	27.0609	NaN	NaN	26.3031
	0.366932	-0.406699	Q8NDX5	Polyhomeotic-like protein 3	PHC3	5	4	10.7	106.16	19.844	26.6998	26.7129	27.0401	26.3101	25.6872	27.2353	26.217	NaN	NaN	NaN	NaN	NaN
	1.17072	-0.403528	P10644	cAMP-dependent protein kinase type I-alpha regulatory subunit;cAMP-dependent protein kinase type I-alpha regulatory subunit, N-terminally processed	PRKAR1A	16	16	48	42.981	78.368	30.1361	30.5664	30.6198	29.9539	30.0217	30.1361	29.4842	29.2285	29.196	29.3473	28.6527	28.7162
	1.40605	-0.403483	Q92574	Hamartin	TSC1	12	12	19.8	129.77	45.382	26.9088	27.217	26.976	26.4394	26.726	26.726	26.9428	26.976	27.2979	NaN	NaN	26.8741
	1.0833	-0.401115	Q6NYC1	Bifunctional arginine demethylase and lysyl-hydroxylase JMJD6	JMJD6	5	5	21.3	46.461	39.804	27.611	27.4551	27.7195	27.4473	26.9088	27.2262	26.5135	26.3943	27.0084	NaN	NaN	26.4057
	0.322236	-0.399497	Q96C19	EF-hand domain-containing protein D2	EFHD2	13	13	48.8	26.697	46.805	30.6285	29.9539	29.4862	30.362	29.4473	29.0609	28.8564	29.0003	29.3869	28.9428	28.6998	28.8799
	2.20211	-0.399381	Q9BYJ9	YTH domain-containing family protein 1	YTHDF1	8	5	23.1	60.873	34.37	29.3066	29.2399	29.1189	28.7549	28.7864	28.9259	28.4234	28.2535	28.4354	NaN	27.5165	27.976
	1.13446	-0.399134	P41240	Tyrosine-protein kinase CSK	CSK	17	17	49.8	50.704	36.615	30.0349	29.6697	29.7244	29.6492	29.267	29.3153	27.5826	27.5315	28.4862	NaN	26.5711	26.9977
	0.56233	-0.398833	Q5VV42	Threonylcarbamoyladenosine tRNA methylthiotransferase	CDKAL1	5	5	15.5	65.111	9.6307	26.1095	25.8044	25.9781	26.1155	25.0737	25.5064	NaN	NaN	25.7543	NaN	NaN	NaN
	0.899882	-0.397753	Q09328	Alpha-1,6-mannosylglycoprotein 6-beta-N-acetylglucosaminyltransferase A	MGAT5	5	5	10.5	84.542	8.6469	25.965	26.1565	26.1927	25.3521	25.75	26.0189	NaN	NaN	26.3376	NaN	NaN	NaN
	0.957228	-0.395898	Q9BY44	Eukaryotic translation initiation factor 2A;Eukaryotic translation initiation factor 2A, N-terminally processed	EIF2A	16	16	45	64.989	41.235	28.5609	28.5682	28.7927	27.965	28.1937	28.5754	27.391	26.1757	27.7389	NaN	26.4041	26.9869
	0.325788	-0.395032	Q9ULH1	Arf-GAP with SH3 domain, ANK repeat and PH domain-containing protein 1	ASAP1	11	11	18.3	125.5	101.21	26.5711	27.341	27.341	25.8352	27.1312	27.1015	NaN	NaN	NaN	NaN	NaN	NaN
	3.02762	-0.394801	Q9Y3S2	Zinc finger protein 330	ZNF330	3	3	20	36.201	8.2954	26.7771	26.7389	26.8623	26.3522	26.4441	26.3975	26.4754	26.8019	NaN	NaN	NaN	26.0752
	1.06827	-0.392553	P49427	Ubiquitin-conjugating enzyme E2 R1	CDC34	3	3	14	26.736	3.6933	26.6458	26.673	26.7771	26.3975	25.9803	26.5404	26.8385	NaN	26.1908	26.6998	26.604	26.3877
	1.18513	-0.392296	Q15056	Eukaryotic translation initiation factor 4H	EIF4H	8	8	33.1	27.385	81.543	30.9045	31.2814	30.7927	30.5664	30.5389	30.6964	30.4032	30.3515	30.2193	30.1842	29.4957	30.0084
	3.17076	-0.391143	Q13200	26S proteasome non-ATPase regulatory subunit 2	PSMD2	46	46	62.1	100.2	323.31	33.933	33.9933	33.9933	33.5179	33.6415	33.5867	33.3568	33.4209	33.5412	33.0283	32.901	33.1115
	0.606993	-0.390868	P42696	RNA-binding protein 34	RBM34	3	3	12.8	48.564	12.189	27.673	26.6998	27.2714	26.7771	26.7517	26.9428	NaN	NaN	NaN	NaN	NaN	NaN
	0.374033	-0.388287	Q5W0V3	Protein FAM160B1	FAM160B1	6	6	13.9	86.557	10.155	26.4645	26.5448	26.7771	25.3587	26.5898	26.673	26.7129	26.3811	26.4999	NaN	26.8741	NaN
	0.639206	-0.384187	Q5UIP0	Telomere-associated protein RIF1	RIF1	10	10	5.7	274.46	15.303	26.7645	26.7771	26.726	26.8974	26.2211	25.9965	27.1115	27.1795	27.965	NaN	26.8623	NaN
	1.12999	-0.382975	O75312	Zinc finger protein ZPR1	ZPR1	8	8	27.5	50.925	28.844	27.7129	28.1164	27.6527	27.3239	27.4629	27.5463	27.0914	27.1795	27.4314	NaN	NaN	NaN
	0.789765	-0.382404	Q16186	Proteasomal ubiquitin receptor ADRM1	ADRM1	7	7	17.4	42.153	40.909	29.5826	29.9259	29.9677	29.0686	29.6372	29.6233	28.7802	28.7676	28.5165	28.6389	28.6764	28.459
	1.20715	-0.3778	Q9UKV5	E3 ubiquitin-protein ligase AMFR	AMFR	5	5	17.1	72.995	20.713	26.1527	25.9825	26.417	25.9157	25.6622	25.8409	NaN	26.2408	NaN	NaN	26.141	26.1293
	1.39094	-0.377418	Q9Y520	Protein PRRC2C	PRRC2C	24	24	15.6	316.91	141.09	30.0084	29.9814	29.7629	29.6527	29.6268	29.341	29.2647	28.7988	29.55	NaN	27.5898	28.459
	0.374475	-0.37575	Q5T9L3	Protein wntless homolog	WLS	7	7	13.5	62.253	9.9722	28.6146	29.1459	29.3088	27.9259	29.1015	28.9146	27.9088	28.6355	29.362	27.3745	28.1652	29.3662
	1.2486	-0.375465	O00401	Neural Wiskott-Aldrich syndrome protein	WASL	6	6	24.2	54.826	24.407	27.9595	28.0349	28.1652	27.4234	27.7833	27.8264	NaN	27.7389	28.3494	NaN	NaN	27.3324
	1.82732	-0.374321	Q8WV99	AN1-type zinc finger protein 2B	ZFAND2B	4	4	30.7	28.022	18.778	26.7895	26.8741	26.8858	26.3031	26.5624	26.5609	26.6181	26.6458	26.673	NaN	NaN	26.0874
	3.88528	-0.373674	Q15691	Microtubule-associated protein RP/EB family member 1	MAPRE1	17	15	79.1	29.999	319.65	32.2731	32.2786	32.2422	31.8497	31.9295	31.8937	32.0512	32.0447	32.0117	31.9848	31.5527	31.6839
	0.57844	-0.370573	Q96P48	Arf-GAP with Rho-GAP domain, ANK repeat and PH domain-containing protein 1	ARAP1	10	10	11.3	162.19	21.192	26.4346	26.2996	26.5898	25.5256	26.3239	26.3629	NaN	26.0547	26.4738	NaN	26.9539	26.3894
	1.19063	-0.369499	Q92968	Peroxisomal membrane protein PEX13	PEX13	3	3	11.7	44.129	5.1047	25.6971	25.9933	25.5754	25.2714	25.3545	25.5315	NaN	NaN	NaN	NaN	NaN	NaN
	0.579967	-0.368989	Q8NEY1	Neuron navigator 1	NAV1	23	23	21	202.47	155.25	29.0762	29.114	29.0137	29.2625	28.3951	28.4394	29.6285	28.8324	29.6612	NaN	26.0874	28.267
	0.885562	-0.368024	Q9UHR4	Brain-specific angiogenesis inhibitor 1-associated protein 2-like protein 1	BAIAP2L1	14	14	35.8	56.882	68.231	26.8858	27.019	27.5165	26.726	26.8142	26.7771	28.6595	28.391	28.1459	27.8799	28.0243	27.2353
	0.658301	-0.367708	Q9Y376	Calcium-binding protein 39	CAB39	7	7	18.8	39.869	25.832	26.8385	26.4583	26.5463	26.6595	25.8839	26.1965	27.2714	27.4785	27.2445	27.0609	27.4551	26.4457
	1.34794	-0.367449	Q9UBU8	Mortality factor 4-like protein 1	MORF4L1	7	6	22.9	41.473	13.368	27.4629	27.4629	27.5898	27.2625	26.8974	27.2535	25.8623	26.4041	26.4707	NaN	26.4138	26.5075
	1.29794	-0.366082	Q63HR2	Tensin-2	TNS2	12	11	19.9	152.58	43.224	27.4707	27.2077	27.5463	27.2077	26.976	26.9428	27.3745	27.2803	27.391	NaN	NaN	27.4314
	1.47717	-0.365936	Q9UKY7	Protein CDV3 homolog	CDV3	13	13	72.1	27.335	211.23	30.611	30.6881	30.846	30.2308	30.5296	30.2869	29.5951	29.1937	29.7064	NaN	29.0788	29.4113
	0.921221	-0.363635	Q6NYC8	Phostensin	PPP1R18	10	10	28.7	67.942	92.273	28.7486	28.5718	28.4234	28.5165	27.976	28.1604	28.7421	28.5426	29.3109	NaN	27.9595	28.5718
	0.195587	-0.363548	Q15650	Activating signal cointegrator 1	TRIP4	4	4	13.4	66.145	28.495	25.9088	26.3562	26.7895	24.6699	26.4676	26.8264	25.9955	NaN	NaN	NaN	NaN	NaN
	1.69617	-0.363002	Q96TA1	Niban-like protein 1	FAM129B	13	13	26.5	84.137	36.754	28.0505	27.8916	27.7453	27.604	27.4629	27.5315	28.4154	28.49	28.7129	28.5573	28.4862	28.5052
	0.566591	-0.362847	Q9UPY8	Microtubule-associated protein RP/EB family member 3	MAPRE3	7	5	33.1	31.982	29.35	26.8504	27.2803	27.0609	26.2021	27.0505	26.8504	26.726	NaN	26.8858	NaN	NaN	26.4202
	0.552471	-0.361802	Q96AC1	Fermitin family homolog 2	FERMT2	22	22	45	77.86	121.07	30.611	31.196	31.1724	30.2077	30.7533	30.933	29.6022	29.3109	29.9117	29.94	29.6931	29.995
	0.463934	-0.361193	Q01968	Inositol polyphosphate 5-phosphatase OCRL-1	OCRL	9	9	13.9	104.2	15.649	26.4676	27.5754	27.0401	26.7517	26.7895	26.4583	26.8385	26.673	26.506	NaN	26.7129	26.6181
	1.38531	-0.359894	Q14669	E3 ubiquitin-protein ligase TRIP12	TRIP12	24	24	19.1	220.43	89.945	28.5463	28.7096	28.9203	28.3109	28.3109	28.4746	29.2054	29.3473	29.3388	29.0965	29.0375	29.0965
	0.450548	-0.359133	Q9Y3D8	Adenylate kinase isoenzyme 6	AK6	5	5	56.4	20.061	36.579	27.6181	27.2803	26.7389	26.9539	27.189	26.417	27.0084	NaN	26.7389	NaN	NaN	NaN
	1.21889	-0.357186	Q9UNF0	Protein kinase C and casein kinase substrate in neurons protein 2	PACSIN2	9	9	23.5	55.738	95.232	28.8623	28.7988	28.4746	28.4032	28.4394	28.2216	28.3662	28.4274	28.4354	27.6251	28.1065	28.003
	0.778448	-0.357054	Q4G148	Glucoside xylosyltransferase 1	GXYLT1	2	2	4.5	50.566	3.8876	26.9088	27.1015	26.48	26.2696	26.6181	26.5315	26.275	26.5285	26.6458	26.9428	26.346	26.425
	0.456635	-0.356476	O95817	BAG family molecular chaperone regulator 3	BAG3	12	12	34.3	61.594	106.1	29.3557	30.0479	29.8112	28.8829	29.8035	29.459	26.506	26.9869	25.9672	NaN	NaN	NaN
	0.398063	-0.356312	P30566	Adenylosuccinate lyase	ADSL	11	11	35.5	54.889	36.267	29.7988	29.4995	28.9031	29.588	28.7581	28.7864	28.3023	28.0137	27.9977	26.4598	26.533	27.4938
	1.66211	-0.356119	P41743	Protein kinase C iota type	PRKCI	7	7	19.3	68.262	177.68	29.003	29.0505	28.8142	28.5682	28.726	28.5052	28.4234	28.4073	28.5203	NaN	27.9316	NaN
	1.31535	-0.35532	Q92917	G patch domain and KOW motifs-containing protein	GPKOW	8	8	33.8	52.228	40.095	28.3704	28.2535	28.2077	28.1556	27.8081	27.8019	27.611	27.3662	27.5754	28.1652	NaN	27.4314
	1.17539	-0.353463	Q9UFC0	Leucine-rich repeat and WD repeat-containing protein 1	LRWD1	11	11	25.2	70.86	39.305	27.8504	27.5014	27.7195	27.5315	27.217	27.2625	27.4629	27.4314	27.4394	27.0084	27.4073	27.391
	0.38994	-0.352713	P98179	RNA-binding protein 3	RBM3	6	6	56.7	17.17	30.179	31.4727	31.8157	32.2135	30.9746	31.4083	32.0609	29.6527	29.94	30.1239	NaN	29.1214	30.2869
	1.3075	-0.352495	P42574	Caspase-3;Caspase-3 subunit p17;Caspase-3 subunit p12	CASP3	7	7	26.7	31.608	32.674	28.0137	27.604	27.8799	27.4314	27.4551	27.5536	28.1164	27.7958	27.9428	27.7581	28.0762	27.6389
	0.711883	-0.351096	Q96SB3	Neurabin-2	PPP1R9B	4	4	8.2	89.191	10.905	26.7645	26.9428	27.0813	26.8264	26.17	26.7389	NaN	NaN	NaN	NaN	NaN	NaN
	2.17573	-0.349874	P42771	Cyclin-dependent kinase inhibitor 2A	CDKN2A	8	8	69.9	16.532	43.689	30.9117	30.7533	30.7692	30.4919	30.5203	30.3724	30.3515	30.196	30.7047	27.5609	29.3683	29.8519
	0.782368	-0.349044	Q96IZ0	PRKC apoptosis WT1 regulator protein	PAWR	7	7	41.5	36.567	76.029	28.5536	28.9896	28.906	28.3196	28.7802	28.3023	28.1214	28.5754	28.1263	28.6629	28.8173	28.6458
	2.05097	-0.349009	Q6Y7W6	PERQ amino acid-rich with GYF domain-containing protein 2	GIGYF2	13	13	16.9	150.07	169.12	29.1937	28.9787	29.1435	28.8019	28.7771	28.6898	29.0686	28.3578	29.141	28.0914	NaN	28.4354
	2.4872	-0.348429	Q4J6C6	Prolyl endopeptidase-like	PREPL	10	10	23.8	83.926	30.842	26.8264	26.9977	26.8623	26.5536	26.512	26.5754	27.391	27.6527	27.6931	NaN	27.0296	27.1507
	1.42455	-0.34758	Q658Y4	Protein FAM91A1	FAM91A1	9	9	18.4	93.908	48.192	26.5696	26.6595	26.7895	26.141	26.3861	26.4488	NaN	NaN	26.8858	NaN	NaN	NaN
	0.363051	-0.346423	P19174	1-phosphatidylinositol 4,5-bisphosphate phosphodiesterase gamma-1	PLCG1	18	18	23.6	148.53	54.07	29.0711	28.4073	28.4073	28.9146	28.1361	27.7958	27.6181	27.2891	26.7771	NaN	NaN	NaN
	1.35091	-0.34601	Q5JSZ5	Protein PRRC2B	PRRC2B	9	9	7.8	242.96	35.77	27.0401	26.9316	26.7517	26.6181	26.673	26.3943	NaN	NaN	26.7389	NaN	NaN	NaN
	1.26914	-0.345767	Q8IYB5	Stromal membrane-associated protein 1	SMAP1	4	4	12.4	50.386	145.99	27.4154	27.2979	27.4785	27.2535	26.8504	27.0505	26.9203	27.3494	26.8741	NaN	27.0914	NaN
	0.972554	-0.343702	Q9HD15	Steroid receptor RNA activator 1	SRA1	7	7	33.5	25.673	67.939	26.9316	27.1604	26.8858	26.8741	26.6865	26.3861	26.5754	26.5754	27.0609	26.8264	25.9847	26.4488
	1.34164	-0.342677	P52292	Importin subunit alpha-1	KPNA2	18	18	54.4	57.861	323.31	32.8385	32.6881	32.5296	32.4895	32.3223	32.2164	30.9609	30.8682	31.4919	29.2913	29.104	29.8974
	0.534634	-0.34074	Q49AR2	UPF0489 protein C5orf22	C5orf22	9	9	38.9	49.967	45.559	27.3828	27.7517	27.9705	27.0609	27.2262	27.7958	26.433	NaN	26.3795	NaN	NaN	NaN
	1.37707	-0.340569	O00762	Ubiquitin-conjugating enzyme E2 C	UBE2C	6	6	52	19.652	16.346	29.391	29.1652	29.3001	29.1214	28.9174	28.7958	NaN	NaN	NaN	NaN	NaN	NaN
	0.104006	-0.340023	Q8IZV5	Retinol dehydrogenase 10	RDH10	11	11	53.4	38.087	73.188	29.3494	30.8234	31.0927	28.0243	30.7927	31.4284	NaN	NaN	NaN	NaN	NaN	25.6012
	0.306831	-0.339284	P51884	Lumican	LUM	9	9	32.2	38.429	65.782	29.2422	29.8157	29.766	28.4629	29.8173	29.5259	29.1652	29.3001	29.1628	29.2803	28.9031	29.019
	1.52139	-0.338909	P46060	Ran GTPase-activating protein 1	RANGAP1	20	20	44.6	63.541	72.445	30.2077	30.341	30.4727	29.8858	30.1239	29.995	29.7739	29.6285	29.8974	29.6424	29.6407	29.7786
	0.180575	-0.338053	P00533	Epidermal growth factor receptor	EGFR	17	16	21.5	134.28	38.609	28.0711	29.5555	28.4394	27.3494	29.267	28.4354	27.8019	27.1312	28.4551	NaN	26.9869	28.2714
	1.22024	-0.337828	P78344	Eukaryotic translation initiation factor 4 gamma 2	EIF4G2	28	28	44.2	102.36	323.31	30.8755	30.9814	30.6881	30.6798	30.5109	30.341	30.7292	30.9117	31.015	30.8974	30.6798	30.4532
	0.739931	-0.335058	Q9Y5V3	Melanoma-associated antigen D1	MAGED1	7	5	17	86.16	65.456	26.976	27.2625	27.2535	26.4598	26.9869	27.0401	26.632	26.726	26.726	NaN	26.0212	NaN
	0.829268	-0.333757	Q9BTE3	Mini-chromosome maintenance complex-binding protein	MCMBP	21	21	44.1	72.979	162.09	29.9539	29.9117	29.6128	29.7942	29.3023	29.3807	29.1819	28.8653	29.1984	27.2891	29.1189	29.0965
	1.77705	-0.333511	Q04637	Eukaryotic translation initiation factor 4 gamma 1	EIF4G1	49	44	44	175.49	323.31	33.6307	33.5527	33.4581	33.3436	33.1828	33.1146	33.4581	33.4334	33.6198	33.1529	32.9259	33.0689
	0.792969	-0.333275	P50749	Ras association domain-containing protein 2	RASSF2	7	6	35.9	37.79	19.17	27.4785	27.9203	27.7708	27.3239	27.1795	27.6663	NaN	NaN	26.1565	NaN	NaN	26.5609
	0.334291	-0.331306	Q14C86	GTPase-activating protein and VPS9 domain-containing protein 1	GAPVD1	19	19	21.4	164.98	207.98	27.3239	27.8564	28.0505	27.524	26.7645	27.9484	29.4862	29.3971	29.3346	28.49	29.2285	28.8081
	0.712289	-0.330704	O00151	PDZ and LIM domain protein 1	PDLIM1	19	19	80.9	36.071	168.47	31.5014	31.5799	31.4532	30.7692	31.4483	31.325	31.2869	31.3088	31.2979	30.8829	31.1544	30.9259
	1.44798	-0.330288	Q86TU7	Histone-lysine N-methyltransferase setd3	SETD3	6	6	13.1	67.256	21.08	27.509	27.5754	27.6181	27.4394	27.141	27.1312	27.3239	27.1015	26.9428	NaN	NaN	26.6998
	0.40973	-0.329697	O60610	Protein diaphanous homolog 1	DIAPH1	21	21	23.3	141.35	60.294	29.341	29.5933	28.7708	29.3088	28.9287	28.4785	28.6798	28.7031	28.5826	27.9484	27.5536	28.0762
	0.249572	-0.329676	P16070	CD44 antigen	CD44	5	5	9.7	81.537	63.193	28.6075	29.8339	29.1386	28.1459	29.461	28.9841	27.3662	NaN	NaN	27.3745	26.976	27.9316
	1.31417	-0.327843	Q9Y295	Developmentally-regulated GTP-binding protein 1	DRG1	8	8	28.9	40.542	185.43	29.0084	28.9146	28.7292	28.6561	28.6216	28.391	28.9484	28.9484	29.0813	29.1263	28.7031	28.4976
	1.34862	-0.327791	Q9H8S9;Q7L9L4	MOB kinase activator 1A;MOB kinase activator 1B	MOB1A;MOB1B	5	5	25.5	25.079	16.273	28.6216	28.8234	28.4473	28.3662	28.2535	28.2891	28.5862	28.6216	28.8711	28.6005	28.4746	27.6998
	1.60886	-0.327019	P41567	Eukaryotic translation initiation factor 1	EIF1	8	3	76.1	12.732	44.064	30.3515	30.4433	30.4032	30.0349	30.2422	29.94	29.6163	29.0243	29.726	NaN	NaN	28.7325
	0.421964	-0.325007	O43395	U4/U6 small nuclear ribonucleoprotein Prp3	PRPF3	8	8	23.4	77.528	61.739	26.3645	26.1075	26.6181	26.1194	25.4942	26.5014	26.4138	26.4923	26.3679	NaN	NaN	NaN
	1.16772	-0.323865	Q9UN86	Ras GTPase-activating protein-binding protein 2	G3BP2	8	7	24.7	54.12	36.348	30.3724	30.2422	30.0479	30.0609	29.8799	29.7502	30.3196	30.2535	30.4532	29.2535	29.267	29.9814
	0.649159	-0.322846	Q6PKG0	La-related protein 1	LARP1	23	23	36.4	123.51	144.9	30.0864	29.8887	29.5352	29.7849	29.5147	29.2422	29.6181	29.4995	29.6337	NaN	28.9923	28.9484
	1.02833	-0.321018	Q9Y666	Solute carrier family 12 member 7	SLC12A7	19	18	23.3	119.1	131.5	29.4785	29.389	29.1866	29.0111	29.2445	28.8355	29.461	29.5333	29.4919	29.4093	29.2869	29.1532
	1.58014	-0.320867	Q8N5A5	Zinc finger CCCH-type with G patch domain-containing protein	ZGPAT	7	7	16.2	57.358	9.6239	27.141	27.0084	27.0914	26.726	26.632	26.9203	26.1814	NaN	26.506	NaN	NaN	NaN
	0.36406	-0.31877	P51784	Ubiquitin carboxyl-terminal hydrolase 11	USP11	7	6	11.2	109.82	13.23	26.6458	26.6998	26.2625	25.5643	26.6998	26.3877	NaN	NaN	26.3762	NaN	NaN	NaN
	0.269181	-0.318475	Q15036	Sorting nexin-17	SNX17	7	7	20.2	52.901	11.754	26.9977	27.0711	27.3992	25.9552	27.0711	27.4862	NaN	26.6865	NaN	NaN	NaN	NaN
	1.25936	-0.316773	Q9UKX7	Nuclear pore complex protein Nup50	NUP50	8	8	26.9	50.144	30.662	28.6285	28.5389	28.362	28.2535	28.3066	28.019	NaN	NaN	27.5754	NaN	NaN	NaN
	0.753182	-0.315107	Q86V59	PNMA-like protein 1	PNMAL1	7	7	26.2	48.16	11.411	27.2803	27.611	27.9031	27.3745	27.1507	27.3239	NaN	NaN	NaN	NaN	NaN	NaN
	1.50579	-0.314774	Q86XL3	Ankyrin repeat and LEM domain-containing protein 2	ANKLE2	6	6	12.9	104.11	14.284	26.4923	26.7895	26.6181	26.2661	26.2838	26.4057	26.4024	26.4298	26.521	NaN	NaN	NaN
	0.51484	-0.314672	Q92598	Heat shock protein 105 kDa	HSPH1	46	43	65.6	96.864	323.31	33.4943	33.3828	32.8919	33.2478	32.995	32.5822	33.1052	33.0705	33.2478	32.8901	32.5686	32.4309
	0.818495	-0.313922	Q99700	Ataxin-2	ATXN2	7	7	8.1	140.28	12.825	26.8741	26.6998	26.5182	26.5754	26.4754	26.0995	26.3273	26.632	26.4831	NaN	NaN	NaN
	2.45004	-0.313458	P11802	Cyclin-dependent kinase 4	CDK4	14	13	54.8	33.729	28.344	30.1842	30.196	30.099	29.7911	29.9259	29.8218	30.196	30.099	30.1842	29.7373	29.4551	29.6964
	1.13774	-0.309071	O75506	Heat shock factor-binding protein 1	HSBP1	5	5	81.6	8.5435	37.949	29.4413	29.3196	29.141	29.1628	28.9705	28.8415	28.9705	29.0839	29.2602	NaN	NaN	NaN
	0.638118	-0.30884	Q15417	Calponin-3	CNN3	15	14	62.6	36.413	296.55	32.3383	32.715	32.5573	31.8937	32.5481	32.2422	30.2535	30.2759	30.8829	29.7723	29.9677	30.4919
	2.55806	-0.308702	Q86YP4	Transcriptional repressor p66-alpha	GATAD2A	16	15	37.4	68.062	41.872	29.2308	29.2759	29.3536	29.0349	28.9677	28.9316	28.3066	NaN	28.6216	NaN	NaN	26.6595
	0.321145	-0.308125	Q92747	Actin-related protein 2/3 complex subunit 1A	ARPC1A	12	11	49.5	41.569	77.686	27.509	27.4234	28.2262	27.2714	26.976	27.9869	29.9814	29.1842	29.4957	28.9787	29.747	29.3196
	1.8797	-0.308107	Q9UK76	Hematological and neurological expressed 1 protein;Hematological and neurological expressed 1 protein, N-terminally processed	HN1	6	6	69.5	16.014	39.854	30.7373	30.8682	30.8534	30.6285	30.4727	30.4334	29.3869	29.0296	29.3324	NaN	NaN	29.0349
	0.282112	-0.307474	Q9H4L7	SWI/SNF-related matrix-associated actin-dependent regulator of chromatin subfamily A containing DEAD/H box 1	SMARCAD1	8	8	13.4	117.4	31.641	26.2768	26.518	26.5898	26.8264	25.3572	26.2785	NaN	NaN	26.5448	NaN	26.2768	NaN
	0.343872	-0.306969	Q96SB4	SRSF protein kinase 1	SRPK1	10	8	20.9	74.324	17.501	28.3066	27.4154	27.2803	27.6389	27.019	27.4234	27.2714	27.2714	26.7389	NaN	26.4707	26.1927
	1.0334	-0.306389	Q16637	Survival motor neuron protein	SMN1	8	8	35.7	31.848	48.981	29.2891	29.3367	28.995	29.0296	28.9428	28.7292	28.6251	28.8142	28.8324	28.5426	28.9146	28.4234
	2.44718	-0.306269	Q8NEM2	SHC SH2 domain-binding protein 1	SHCBP1	9	9	17.9	75.69	49.64	27.2353	27.3324	27.3745	26.9977	27.0609	26.965	NaN	NaN	26.9203	NaN	NaN	NaN
	0.809739	-0.305143	Q9Y3C1	Nucleolar protein 16	NOP16	6	6	31.5	21.188	44.124	26.9539	26.5255	26.673	26.604	26.4441	26.189	26.7129	26.673	26.604	NaN	26.7129	26.4186
	1.32032	-0.304186	Q6ZSR9	Uncharacterized protein FLJ45252		6	6	30.7	37.976	91.843	27.673	27.8564	27.8799	27.3324	27.6181	27.5463	27.1015	NaN	27.8682	NaN	NaN	27.3828
	0.934756	-0.303453	Q96IV0	Peptide-N(4)-(N-acetyl-beta-glucosaminyl)asparagine amidase	NGLY1	8	8	21.3	74.389	37.735	27.6931	28.0557	27.965	27.391	27.6865	27.726	NaN	NaN	NaN	NaN	NaN	NaN
	0.652069	-0.303003	P17301	Integrin alpha-2	ITGA2	9	9	16.7	129.29	41.174	26.726	26.6595	26.3828	26.5609	26.3562	25.9422	26.4723	26.521	26.3861	NaN	27.0505	26.8142
	1.29631	-0.302759	P05023	Sodium/potassium-transporting ATPase subunit alpha-1	ATP1A1	34	21	39.1	112.89	323.31	32.3854	32.7068	32.5273	32.1269	32.3223	32.2619	31.7888	31.9153	31.8347	32.0705	31.8004	31.7573
	0.180791	-0.301513	A3KMH1	von Willebrand factor A domain-containing protein 8	VWA8	34	34	24.3	214.82	116.04	26.6595	25.3766	25.1871	26.2353	24.7389	25.3444	29.3346	29.4453	29.8741	30.4032	30.4032	30.4532
	0.631461	-0.29922	Q9NR12	PDZ and LIM domain protein 7	PDLIM7	14	14	52.7	49.844	94.68	29.6058	29.995	30.1483	29.3452	29.6981	29.8081	29.747	29.7692	30.3088	29.2353	29.94	29.8901
	2.1115	-0.298419	P60842	Eukaryotic initiation factor 4A-I	EIF4A1	31	19	78.3	46.153	323.31	35.099	35.1068	35.0471	34.8608	34.8234	34.6735	34.8328	34.7751	34.8974	34.5922	34.4581	34.5527
	2.48415	-0.297681	Q7Z2W4	Zinc finger CCCH-type antiviral protein 1	ZC3HAV1	29	29	47.8	101.43	323.31	30.947	30.9117	30.8385	30.5664	30.6713	30.5664	30.7211	30.8004	30.8755	30.5203	30.6198	30.6285
	0.49339	-0.296966	O14737	Programmed cell death protein 5	PDCD5	7	7	56	14.285	60.881	30.4629	30.1239	29.6881	30.0349	29.7864	29.5627	29.4727	28.9814	29.2216	NaN	28.8682	28.5052
	0.822923	-0.296077	Q15154	Pericentriolar material 1 protein	PCM1	11	11	9.8	228.54	52.826	27.4785	27.1214	27.4394	27.2803	27.0084	26.8623	26.7389	NaN	27.019	NaN	NaN	NaN
	1.61509	-0.295204	Q99622	Protein C10	C12orf57	5	5	63.5	13.178	14.472	27.5389	27.7581	27.7581	27.341	27.3578	27.4707	28.0137	28.1263	27.8741	27.5754	27.5826	27.5969
	1.77135	-0.295073	Q9HCD5	Nuclear receptor coactivator 5	NCOA5	7	7	32.1	65.536	53.047	28.391	28.2891	28.249	27.9031	28.0243	28.1164	NaN	NaN	26.632	NaN	28.2535	26.9428
	0.906865	-0.293292	O15042	U2 snRNP-associated SURP motif-containing protein	U2SURP	22	22	29.3	118.29	98.341	30.3828	30.2077	30.1239	30.1115	29.6881	30.0349	29.4765	29.509	29.49	28.6424	29.0634	28.8294
	0.488709	-0.293179	P27105	Erythrocyte band 7 integral membrane protein	STOM	7	7	38.9	31.73	51.24	28.3153	28.9316	28.362	27.9088	28.4668	28.3536	28.7613	29.196	28.7195	29.4254	29.1015	29.4314
	1.37826	-0.292908	Q9UJC3	Protein Hook homolog 1	HOOK1	18	18	30.6	84.647	173.25	28.7517	28.7129	28.8682	28.5052	28.6251	28.3239	29.0453	28.976	28.8142	28.4862	28.4433	28.2353
	0.27137	-0.291788	O95372	Acyl-protein thioesterase 2	LYPLA2	5	5	41.1	24.737	36.199	29.0889	28.0864	28.6458	28.9512	28.0296	27.965	28.5426	27.9203	27.8623	28.0084	NaN	28.5315
	1.95932	-0.291665	Q9NYB9	Abl interactor 2	ABI2	9	6	22.4	55.663	14.301	26.673	26.533	26.7129	26.3066	26.3187	26.4186	27.3066	27.5463	27.1312	28.1164	27.5609	27.3662
	0.611736	-0.28998	P54709	Sodium/potassium-transporting ATPase subunit beta-3	ATP1B3	8	8	38.7	31.512	25.644	29.8711	29.6527	29.3131	29.5481	29.3452	29.0737	29.1676	29.4113	29.21	28.9031	28.7486	28.8324
	0.289918	-0.289031	Q99880;Q99879;Q99877;Q93079;Q5QNW6;P62807;P58876;P57053;O60814;Q96A08	Histone H2B type 1-L;Histone H2B type 1-M;Histone H2B type 1-N;Histone H2B type 1-H;Histone H2B type 2-F;Histone H2B type 1-C/E/F/G/I;Histone H2B type 1-D;Histone H2B type F-S;Histone H2B type 1-K;Histone H2B type 1-A	HIST1H2BL;HIST1H2BM;HIST1H2BN;HIST1H2BH;HIST2H2BF;HIST1H2BC;HIST1H2BD;H2BFS;HIST1H2BK;HIST1H2BA	6	2	41.3	13.952	7.0573	33.2759	33.4083	33.6629	32.611	32.9626	33.9063	NaN	NaN	NaN	NaN	NaN	NaN
	0.541324	-0.288883	P50402	Emerin	EMD	8	8	47.6	28.994	29.059	29.109	29.0583	29.203	28.6964	28.5203	29.2869	28.9031	28.6764	29.0583	28.7227	28.3869	29.0137
	0.638991	-0.288881	Q9BPX3	Condensin complex subunit 3	NCAPG	14	14	17.8	114.33	38.61	28.3951	28.0609	27.8858	28.0762	27.5969	27.8019	27.0914	26.8741	26.9977	27.3828	27.2714	27.391
	1.65819	-0.288051	Q14444	Caprin-1	CAPRIN1	15	15	29.8	78.365	156.93	31.099	31.2077	31.0349	30.947	30.7533	30.7771	30.8234	30.9259	30.8081	30.1361	30.2759	30.4532
	2.30999	-0.287882	Q9UQ35	Serine/arginine repetitive matrix protein 2	SRRM2	39	39	20.8	299.61	308.52	31.2479	31.2759	31.1239	30.8974	30.9188	30.9677	31.2479	30.6198	31.6501	29.1435	29.0889	30.6629
	1.88447	-0.287835	P13693	Translationally-controlled tumor protein	TPT1	9	9	52.9	19.595	33.733	32.3594	32.3088	32.1989	32.0769	32.015	31.9117	32.3223	32.3698	32.3568	32.015	32.1483	31.9848
	1.08851	-0.287562	Q9H2M9	Rab3 GTPase-activating protein non-catalytic subunit	RAB3GAP2	26	26	27.4	155.98	66.659	28.8653	28.8534	29.0322	28.8203	28.6285	28.4394	29.3807	29.5352	29.4254	28.1604	28.6931	29.0531
	0.621813	-0.287266	Q9Y6Y0	Influenza virus NS1A-binding protein	IVNS1ABP	6	6	15.6	71.729	67.734	27.8445	27.7645	27.189	27.2891	27.2891	27.3578	27.341	27.4314	27.3992	NaN	NaN	NaN
	2.00232	-0.287213	Q9BU89	Deoxyhypusine hydroxylase	DOHH	6	6	41.7	32.904	31.049	27.7064	27.7129	27.7771	27.3828	27.391	27.5609	27.7195	27.6663	27.5609	27.7389	27.7129	27.2262
	0.179853	-0.286427	Q02952	A-kinase anchor protein 12	AKAP12	59	59	55.5	191.48	323.31	31.1604	32.3956	31.9609	30.611	32.2308	31.8157	NaN	NaN	NaN	NaN	NaN	NaN
	1.07085	-0.285887	P35658	Nuclear pore complex protein Nup214	NUP214	19	19	19.9	213.62	85.263	28.7581	28.7486	28.4032	28.2847	28.4394	28.3282	27.9203	28.4274	28.4668	NaN	28.3023	28.3869
	0.739853	-0.283589	Q96SZ5	2-aminoethanethiol dioxygenase	ADO	5	5	33.7	29.751	10.02	26.2679	26.2589	25.9672	26.1449	25.8552	25.6431	NaN	26.604	26.3014	NaN	26.2535	25.8764
	0.551857	-0.283126	P20336	Ras-related protein Rab-3A	RAB3A	7	4	42.7	24.984	15.309	28.2216	27.509	27.7771	27.3745	27.604	27.6798	28.6005	28.7357	28.3787	28.5573	28.3196	27.7708
	0.615632	-0.283047	Q99704	Docking protein 1	DOK1	12	12	46.6	52.391	59.492	28.3153	28.2979	28.6389	27.8564	28.0914	28.4551	NaN	NaN	NaN	NaN	NaN	27.2262
	0.439746	-0.282141	P55011	Solute carrier family 12 member 2	SLC12A2	12	12	17.7	131.45	44.687	27.8858	28.3196	28.0609	27.341	28.17	27.9088	27.6527	27.3324	27.965	26.8741	27.5014	26.9428
	1.38636	-0.282002	O60828	Polyglutamine-binding protein 1	PQBP1	6	6	33.2	30.472	55.222	28.7676	28.8623	28.9203	28.4862	28.4823	28.7357	28.019	NaN	28.3109	NaN	NaN	NaN
	1.30135	-0.27913	O43252	Bifunctional 3-phosphoadenosine 5-phosphosulfate synthase 1;Sulfate adenylyltransferase;Adenylyl-sulfate kinase	PAPSS1	19	18	46.3	70.832	115.67	30.9539	30.9117	30.8974	30.8157	30.4727	30.6372	31.5389	31.4727	31.4184	31.4234	30.9882	31.4134
	0.329306	-0.278301	Q13613	Myotubularin-related protein 1	MTMR1	9	8	23.3	74.677	44.762	26.4488	26.8019	26.6998	26.6386	25.7126	26.7645	27.2979	27.4551	27.0609	27.3578	26.9539	27.4473
	1.46203	-0.278286	Q9Y6H1;Q5T1J5	Coiled-coil-helix-coiled-coil-helix domain-containing protein 2;Putative coiled-coil-helix-coiled-coil-helix domain-containing protein CHCHD2P9, mitochondrial	CHCHD2;CHCHD2P9	4	4	33.8	15.512	79.301	29.3515	29.258	29.2422	29.1263	29.0401	28.8504	28.9923	29.0583	28.7988	28.4314	28.4746	28.258
	3.20676	-0.277384	Q92900	Regulator of nonsense transcripts 1	UPF1	45	45	51.6	124.34	323.31	31.6671	31.6501	31.6154	31.3672	31.4083	31.325	31.3196	31.3196	31.4184	31.4871	31.2077	31.1901
	0.57039	-0.276902	O15446	DNA-directed RNA polymerase I subunit RPA34	CD3EAP	7	7	30.4	54.985	80.215	28.3869	27.7517	28.2535	27.7453	27.7708	28.0453	26.5105	26.8974	26.965	27.6931	27.4938	27.189
	0.643032	-0.276727	Q9BWU0	Kanadaptin	SLC4A1AP	14	14	37.1	88.813	138.88	29.0401	29.3848	29.4154	28.7064	29.0914	29.2123	28.019	27.2445	28.0401	NaN	26.3494	26.4425
	0.532035	-0.276671	O43164	E3 ubiquitin-protein ligase Praja-2	PJA2	6	6	23.6	78.213	103.14	26.8385	27.1507	27.2979	26.452	27.0401	26.965	26.512	NaN	NaN	NaN	NaN	NaN
	0.899051	-0.276122	Q15758	Neutral amino acid transporter B(0)	SLC1A5	11	11	22.2	56.598	152.94	31.7652	32.2019	32.1115	31.6501	31.8309	31.7692	31.8157	31.8608	31.9609	31.6242	31.2591	31.2924
	0.220458	-0.275878	Q9Y487	V-type proton ATPase 116 kDa subunit a isoform 2	ATP6V0A2	9	9	14.7	98.081	13.016	26.7771	26.346	26.5638	26.7517	26.7645	25.3431	27.524	27.6251	27.524	27.7129	27.2979	27.2353
	0.693583	-0.274977	P30622	CAP-Gly domain-containing linker protein 1	CLIP1	15	12	14.5	162.24	30.974	27.5682	27.6931	27.8623	27.1214	27.6458	27.5315	27.9484	28.141	28.0762	NaN	27.6663	27.5463
	2.30225	-0.27386	Q9Y508	E3 ubiquitin-protein ligase RNF114	RNF114	7	7	51.8	25.694	32.364	29.4492	29.4976	29.4234	29.2625	29.1115	29.1747	27.976	27.965	27.976	NaN	27.4551	27.4314
	0.88591	-0.273784	P40855	Peroxisomal biogenesis factor 19	PEX19	8	8	37.8	32.806	272.15	27.8081	27.8916	27.6458	27.4314	27.7517	27.341	27.3745	27.5969	27.5969	NaN	27.5165	27.391
	1.35249	-0.273686	Q7Z7E8	Ubiquitin-conjugating enzyme E2 Q1	UBE2Q1	5	5	27.5	46.126	47.637	27.6389	27.7645	27.4785	27.391	27.4073	27.2625	27.3153	27.5536	27.3153	NaN	NaN	26.7129
	1.07116	-0.273261	Q96T88	E3 ubiquitin-protein ligase UHRF1	UHRF1	19	19	32.4	89.813	235.86	29.9814	29.6181	29.9117	29.6285	29.4785	29.5844	27.6527	28.6285	28.8081	NaN	26.1507	27.9484
	0.49202	-0.272891	Q86W92	Liprin-beta-1	PPFIBP1	14	12	20.1	114.02	63.503	27.0609	27.7958	27.611	27.0609	27.3992	27.189	27.7581	27.4314	27.7581	27.9595	27.6527	27.4394
	0.791187	-0.272511	P52594	Arf-GAP domain and FG repeat-containing protein 1	AGFG1	6	6	18.9	58.259	200.41	28.7771	28.7549	28.4862	28.1459	28.4938	28.5609	28.2803	27.8974	28.3494	NaN	NaN	27.4073
	0.51231	-0.271465	Q6XZF7	Dynamin-binding protein	DNMBP	8	8	8.6	177.35	10.533	26.0275	26.1661	25.9406	25.3297	25.9584	26.0317	NaN	25.7594	NaN	NaN	NaN	25.9803
	1.314	-0.271402	P23588	Eukaryotic translation initiation factor 4B	EIF4B	12	12	23.2	69.15	149.81	30.2308	30.1239	29.995	29.9814	29.7629	29.7911	30.1842	30.099	30.2869	29.114	29.7676	29.94
	0.739783	-0.270974	Q9Y385	Ubiquitin-conjugating enzyme E2 J1	UBE2J1	5	5	24.5	35.198	14.213	26.4346	26.4138	26.6998	25.965	26.3645	26.4057	26.3528	NaN	26.1642	NaN	NaN	NaN
	1.96438	-0.270932	Q15382	GTP-binding protein Rheb	RHEB	7	7	28.8	20.497	20.369	28.5128	28.5646	28.5426	28.1795	28.249	28.3787	28.6181	29.1214	29.1312	28.7958	28.7708	28.4113
	2.99122	-0.270437	P57678	Gem-associated protein 4	GEMIN4	9	9	14	120.04	95.756	28.55	28.5278	28.5014	28.3109	28.2399	28.217	28.003	28.1795	28.0137	27.4473	27.7517	27.673
	1.0051	-0.270076	Q9NRV9	Heme-binding protein 1	HEBP1	5	5	43.9	21.097	13.525	27.1015	27.2803	27.5014	26.9539	27.1214	26.9977	27.391	27.4629	27.17	NaN	27.2625	27.3324
	0.469617	-0.269837	Q9BXB5	Oxysterol-binding protein-related protein 10	OSBPL10	7	6	11.4	83.969	26.244	27.2353	27.8142	27.604	26.9316	27.5463	27.3662	27.3745	27.391	27.6251	27.5898	27.3828	27.7453
	0.755053	-0.269398	O60716	Catenin delta-1	CTNND1	25	25	40.2	108.17	323.31	31.1783	31.2422	30.94	31.0544	30.9045	30.5933	30.947	30.9814	31.2193	30.9259	30.8004	30.6285
	0.458794	-0.269346	O15484	Calpain-5	CAPN5	3	3	8.1	73.168	7.4576	26.1661	26.7771	26.3844	25.8708	26.1565	26.4923	26.4073	NaN	26.632	NaN	NaN	26.673
	1.30132	-0.269344	Q9Y4P1	Cysteine protease ATG4B	ATG4B	12	12	42	44.294	55.128	28.1556	28.1747	28.3023	27.965	27.7833	28.0762	28.2759	28.1984	28.0243	27.9484	27.9031	27.7645
	0.648066	-0.269324	O95155	Ubiquitin conjugation factor E4 B	UBE4B	15	15	19.6	146.18	30.083	27.7517	28.249	28.0137	27.4938	27.8682	27.8445	NaN	26.4473	27.0813	26.9428	NaN	26.632
	0.683985	-0.269053	P13995	Bifunctional methylenetetrahydrofolate dehydrogenase/cyclohydrolase, mitochondrial;NAD-dependent methylenetetrahydrofolate dehydrogenase;Methenyltetrahydrofolate cyclohydrolase	MTHFD2	10	10	55.4	37.895	37.976	29.673	29.203	29.3704	29.3578	29.1164	28.965	29.1164	29.0057	29.5147	28.604	28.9512	29.0839
	1.91341	-0.268646	Q3KQU3	MAP7 domain-containing protein 1	MAP7D1	10	10	16.2	92.819	44.153	28.1312	27.9814	28.0084	27.7895	27.8324	27.6931	28.1459	28.3324	28.1604	28.1459	28.1015	27.8564
	0.942391	-0.268331	Q5SRE5	Nucleoporin NUP188 homolog	NUP188	12	12	8.7	196.04	22.079	27.3324	27.2891	26.9977	27.1015	26.8623	26.8504	27.7581	27.8799	28.0505	NaN	27.4938	27.5315
	0.751701	-0.266675	Q96S59	Ran-binding protein 9	RANBP9	8	8	14	77.846	22.376	27.8081	27.4234	27.3992	27.4629	27.217	27.1507	27.6998	27.7325	27.509	27.611	27.2445	NaN
	0.871848	-0.266155	Q86Y56	Dynein assembly factor 5, axonemal	DNAAF5	14	14	23	93.52	80.388	27.7325	27.5389	27.5754	27.4707	27.4862	27.0914	27.726	27.7895	27.8264	27.6595	27.4629	27.391
	2.15662	-0.265241	Q14008	Cytoskeleton-associated protein 5	CKAP5	47	47	32.2	225.49	251.36	31.099	31.2308	31.1842	30.8608	30.8829	30.9746	31.393	31.4823	31.5481	31.2869	31.1239	31.1177
	0.851655	-0.26516	Q9C0C2	182 kDa tankyrase-1-binding protein	TNKS1BP1	46	46	47.5	181.79	323.31	30.9117	31.1361	31.0609	30.5203	30.947	30.846	31.0927	30.8081	31.2135	28.9287	30.5014	30.6798
	0.661913	-0.264665	P42336	Phosphatidylinositol 4,5-bisphosphate 3-kinase catalytic subunit alpha isoform	PIK3CA	11	11	12.3	124.28	12.427	25.3712	25.5285	25.5638	25.3811	25.4073	24.8811	25.5105	25.3342	NaN	25.4645	25.0359	25.341
	0.594644	-0.264551	Q10589	Bone marrow stromal antigen 2	BST2	4	4	18.3	19.769	12.737	27.8682	27.7389	27.2714	27.4314	27.1984	27.4551	NaN	NaN	NaN	NaN	NaN	NaN
	0.734967	-0.264138	Q9BYG3	MKI67 FHA domain-interacting nucleolar phosphoprotein	NIFK	9	9	43.3	34.222	76.883	27.6663	27.2625	27.4394	27.4234	27.0914	27.0609	NaN	27.0813	NaN	NaN	27.2803	NaN
	0.500629	-0.263765	Q08378	Golgin subfamily A member 3	GOLGA3	23	23	22.2	167.35	246.78	27.4234	28.0401	27.9814	27.3153	27.7064	27.632	27.7958	28.1842	27.5536	28.0965	28.0609	27.4154
	2.13395	-0.263695	Q8N6T3	ADP-ribosylation factor GTPase-activating protein 1	ARFGAP1	10	10	38.7	44.667	77.693	28.2891	28.3452	28.3239	27.9595	28.0813	28.1263	27.6663	27.5898	27.9031	NaN	NaN	27.2077
	1.49463	-0.263301	Q9NRL3	Striatin-4	STRN4	11	10	31.3	80.595	51.964	29.0164	29.2692	29.1065	28.8142	28.8564	28.9316	29.0111	29.0003	29.0557	28.3951	28.3992	28.6964
	1.13859	-0.261819	P52815	39S ribosomal protein L12, mitochondrial	MRPL12	6	6	47.5	21.348	50.536	30.3303	30.1361	30.2308	30.099	29.7911	30.0217	30.0737	30.1604	30.341	30.4234	30.3515	30.4234
	1.24149	-0.261602	Q9UL25	Ras-related protein Rab-21	RAB21	7	7	34.7	24.347	131.11	29.1507	29.2376	29.0401	28.8623	29.0296	28.7517	29.0375	29.3641	29.2262	29.2376	29.0686	29.0864
	1.47383	-0.261376	Q8NDI1	EH domain-binding protein 1	EHBP1	10	9	13.2	140.02	77.005	27.3494	27.4473	27.4473	27.2625	27.0084	27.189	NaN	NaN	27.2353	NaN	NaN	NaN
	1.59741	-0.260859	Q7L1Q6	Basic leucine zipper and W2 domain-containing protein 1	BZW1	10	9	18.9	48.043	12.582	29.6198	29.4765	29.5808	29.3951	29.3153	29.1842	30.099	29.995	30.1361	29.8504	29.6612	29.7195
	0.673199	-0.260644	Q13416	Origin recognition complex subunit 2	ORC2	5	5	13.5	65.971	10.481	25.6944	25.9383	25.4266	25.6161	25.3341	25.3273	NaN	26.0084	25.7619	NaN	NaN	25.8717
	1.58045	-0.259693	Q6ZRP7	Sulfhydryl oxidase 2	QSOX2	7	7	14.8	77.528	15.052	26.9203	27.0505	26.8623	26.6998	26.7645	26.5898	27.4394	27.509	27.4785	26.9088	26.8264	26.7645
	1.71911	-0.259398	Q13765;E9PAV3	Nascent polypeptide-associated complex subunit alpha;Nascent polypeptide-associated complex subunit alpha, muscle-specific form	NACA	5	5	32.6	23.384	118.53	31.7573	31.8645	31.7252	31.4871	31.6285	31.4532	31.5203	31.5573	31.5978	31.5481	31.4823	31.2308
	0.352738	-0.258935	O15439	Multidrug resistance-associated protein 4	ABCC4	42	41	39.3	149.52	323.31	27.7958	27.7389	27.217	27.5682	27.5682	26.8385	31.3828	31.393	31.1361	31.0479	31.341	31.2647
	1.98353	-0.258898	O60678	Protein arginine N-methyltransferase 3	PRMT3	9	9	20.3	59.902	15.823	27.6181	27.4234	27.5315	27.2803	27.2535	27.2625	27.3494	27.3153	27.3745	27.2979	26.8504	NaN
	1.11695	-0.258569	Q96A49	Synapse-associated protein 1	SYAP1	13	13	49.1	39.933	110.79	29.9259	29.8294	29.8623	29.4214	29.7833	29.6372	29.2979	29.2803	29.4354	28.4976	28.2445	28.2262
	0.839725	-0.258547	O95433	Activator of 90 kDa heat shock protein ATPase homolog 1	AHSA1	14	14	47.3	38.274	181.56	31.1361	31.4234	31.08	31.0864	31.0084	30.7692	30.1239	30.1724	30.0864	29.6764	29.7195	30.0609
	1.59748	-0.258526	P68104;Q5VTE0	Elongation factor 1-alpha 1;Putative elongation factor 1-alpha-like 3	EEF1A1;EEF1A1P5	31	18	75.3	50.14	323.31	37.3568	37.3972	37.2461	37.0266	37.192	37.0059	36.9634	36.8399	37.0266	36.5839	36.4733	36.5698
	3.68415	-0.258467	Q8TCT9	Minor histocompatibility antigen H13	HM13	7	7	23.1	41.488	197.85	28.258	28.3023	28.3196	28.0243	28.0296	28.0505	28.9146	29.2979	28.8112	29.6181	29.141	28.7833
	1.57267	-0.257827	O14757	Serine/threonine-protein kinase Chk1	CHEK1	5	5	13.4	54.433	6.0495	26.1449	26.2151	26.1814	26.0484	25.797	25.9225	NaN	NaN	NaN	NaN	NaN	NaN
	0.325859	-0.257683	P13797	Plastin-3	PLS3	28	25	48.7	70.81	193.71	31.7292	32.3276	32.2703	31.325	32.1146	32.1146	30.5109	30.4727	31.1361	30.7927	30.5296	31.0217
	0.864699	-0.257682	O60547	GDP-mannose 4,6 dehydratase	GMDS	8	8	32	41.949	10.684	26.7645	27.189	27.0609	26.8623	26.673	26.7059	26.632	26.558	26.6998	NaN	26.7895	NaN
	0.625944	-0.257018	Q86UK7	Zinc finger protein 598	ZNF598	10	10	20.9	98.636	46.056	26.9539	26.5898	26.632	26.7517	26.2768	26.3762	26.8385	26.9316	26.8019	NaN	26.4504	26.5898
	0.254308	-0.256641	O76024	Wolframin	WFS1	8	8	13.4	100.29	19.018	27.2262	26.9869	27.3239	27.0914	26.1818	27.4938	NaN	27.2979	27.4394	NaN	27.217	27.3992
	0.269164	-0.256053	P36543	V-type proton ATPase subunit E 1	ATP6V1E1	7	7	30.5	26.145	36.235	27.8858	28.9539	27.976	27.7064	28.0609	28.2803	28.0137	27.8564	28.4746	28.49	28.2759	27.8623
	0.400867	-0.255749	Q9BQ39	ATP-dependent RNA helicase DDX50	DDX50	15	13	33.1	82.564	39.403	29.109	28.341	28.9814	28.6831	28.6831	28.2979	27.189	27.7895	27.9146	27.5826	27.9923	28.0965
	0.478739	-0.255475	Q8IWZ3	Ankyrin repeat and KH domain-containing protein 1	ANKHD1	13	7	9	269.45	140.72	27.0505	26.726	26.3745	26.2408	26.673	26.4707	NaN	NaN	26.1055	NaN	NaN	NaN
	1.58396	-0.25514	O95793	Double-stranded RNA-binding protein Staufen homolog 1	STAU1	12	12	31.5	63.182	82.574	29.4862	29.5184	29.3239	29.1913	29.2602	29.1115	28.5862	28.5315	28.6595	28.7162	28.3109	28.3992
	0.156082	-0.255097	O75962	Triple functional domain protein	TRIO	20	20	10.6	346.9	33.52	27.189	28.141	28.203	26.632	28.4032	27.7325	26.2021	NaN	NaN	NaN	NaN	NaN
	1.06382	-0.255016	P35221	Catenin alpha-1	CTNNA1	28	23	45.5	100.07	323.31	30.0864	30.2308	30.2308	29.7597	30.1115	29.9117	30.099	30.0479	30.2535	28.805	29.9677	30.2535
	0.723248	-0.254583	Q13643	Four and a half LIM domains protein 3	FHL3	12	12	57.1	31.192	144.5	30.0217	30.2422	30.4433	29.7708	30.0737	30.099	30.0609	30.196	30.5573	29.4093	29.7645	30.4234
	0.520294	-0.254227	Q96PK6	RNA-binding protein 14	RBM14	15	15	31.2	69.491	73.665	30.5664	30.6198	30.4234	30.5933	29.8916	30.362	29.5109	29.6981	29.8623	NaN	30.0479	28.8711
	0.448807	-0.252097	Q15654	Thyroid receptor-interacting protein 6	TRIP6	21	21	74.6	50.287	181.7	30.9677	31.5203	31.6022	30.8385	31.2308	31.2647	30.8974	30.7533	31.4184	29.9539	30.5933	30.8608
	1.27044	-0.251796	P62495	Eukaryotic peptide chain release factor subunit 1	ETF1	14	14	38.4	49.03	82.432	31.2814	31.2077	31.1544	31.1115	30.8157	30.9609	30.9746	31.0544	31.0349	30.5664	30.8829	30.7771
	1.61906	-0.250168	Q9NUL3	Double-stranded RNA-binding protein Staufen homolog 2	STAU2	10	10	24.7	62.608	23.813	27.3153	27.2353	27.4629	27.0813	27.1312	27.0505	27.4785	27.5754	27.6595	NaN	NaN	27.3578
	0.570319	-0.249937	Q9HCS7	Pre-mRNA-splicing factor SYF1	XAB2	11	11	18.1	100.01	52.684	27.0296	26.9428	26.8974	26.8741	26.3256	26.9203	26.3975	26.3975	26.5225	NaN	NaN	26.509
	0.730646	-0.249072	Q99590	Protein SCAF11	SCAF11	5	5	7.1	164.65	21.571	26.9088	26.4815	26.4862	26.3031	26.5075	26.3187	26.4122	NaN	26.5014	NaN	NaN	25.9473
	3.17295	-0.248994	Q7KZ85	Transcription elongation factor SPT6	SUPT6H	30	30	28	199.07	201.93	29.7341	29.7373	29.6831	29.4995	29.4746	29.4334	29.0686	29.1771	29.3431	28.7325	29.0864	29.2512
	1.13874	-0.248587	Q9BQ61	Uncharacterized protein C19orf43	C19orf43	3	3	21.6	18.419	5.957	27.1214	27.3324	27.3153	27.1507	26.9869	26.8858	NaN	27.3494	NaN	NaN	27.611	NaN
	0.338933	-0.248458	Q8N8S7	Protein enabled homolog	ENAH	16	16	31.3	66.509	84.366	29.5898	30.362	29.6424	29.94	29.5573	29.3515	28.7549	27.524	28.7895	27.673	27.2891	27.3578
	0.410309	-0.247665	P42695	Condensin-2 complex subunit D3	NCAPD3	9	9	9.1	168.89	22.394	27.391	27.0609	26.673	27.0914	26.6865	26.604	26.3153	26.17	26.452	NaN	26.1852	26.2133
	0.365891	-0.247633	Q96FC7	Phytanoyl-CoA hydroxylase-interacting protein-like	PHYHIPL	10	10	33.5	42.486	94.56	29.4093	29.7146	29.7771	28.8682	29.6544	29.6355	NaN	NaN	NaN	NaN	NaN	NaN
	0.706803	-0.247513	Q9NZL4	Hsp70-binding protein 1	HSPBP1	6	6	31.8	39.302	15.664	27.4629	27.611	27.2353	27.189	27.391	26.9869	26.8142	26.4938	26.6181	NaN	26.2002	26.0711
	0.748842	-0.247053	O60573	Eukaryotic translation initiation factor 4E type 2	EIF4E2	5	5	33.9	28.362	17.428	27.2077	26.9088	27.2979	27.0401	26.9203	26.7129	27.2625	27.1115	26.9977	NaN	26.9869	27.4234
	0.906647	-0.246927	P62191	26S protease regulatory subunit 4	PSMC1	25	25	63	49.184	304.97	32.0184	32.2563	32.3115	31.7692	32.0479	32.0283	31.4234	31.5889	31.5203	31.7252	31.362	31.393
	0.664703	-0.246457	Q16270	Insulin-like growth factor-binding protein 7	IGFBP7	6	6	35.1	29.13	13.42	26.9316	27.2625	26.8264	26.558	26.8142	26.9088	26.7389	26.7389	28.1842	NaN	NaN	27.4785
	1.92502	-0.246404	O95486	Protein transport protein Sec24A	SEC24A	15	15	19.7	119.75	28.686	28.258	28.4154	28.4194	28.141	28.1312	28.0813	28.632	28.5862	28.2625	27.3992	28.3787	28.2535
	1.26603	-0.246185	Q92733	Proline-rich protein PRCC	PRCC	3	3	11.4	52.417	13.075	27.5165	27.3578	27.4938	27.3153	27.0609	27.2535	NaN	NaN	NaN	NaN	NaN	NaN
	0.423747	-0.245651	Q8TEQ6	Gem-associated protein 5	GEMIN5	35	35	35.7	168.59	212.33	30.5933	30.2308	30.0349	30.3515	30.0609	29.7096	30.3303	30.3088	30.341	29.2602	29.8974	29.995
	0.81524	-0.245531	Q8IYD1	Eukaryotic peptide chain release factor GTP-binding subunit ERF3B	GSPT2	17	8	41.4	68.882	33.647	28.2262	28.6251	28.2625	28.2353	28.0453	28.0965	NaN	NaN	NaN	NaN	NaN	NaN
	1.49555	-0.245371	Q2NKX8	DNA excision repair protein ERCC-6-like	ERCC6L	18	18	22.2	141.1	68.456	28.4707	28.4154	28.6492	28.3066	28.2123	28.2803	27.8799	27.6527	28.217	NaN	NaN	27.17
	1.53089	-0.245089	Q63ZY3	KN motif and ankyrin repeat domain-containing protein 2	KANK2	23	22	43.1	91.173	280.07	30.1239	30.1483	30.2422	29.9539	29.8035	30.0217	29.726	29.6798	30.0609	28.4473	28.6998	29.4473
	0.14554	-0.245056	P35573	Glycogen debranching enzyme;4-alpha-glucanotransferase;Amylo-alpha-1,6-glucosidase	AGL	8	8	7.6	174.76	14.361	26.8142	26.6865	26.7389	27.189	25.2546	27.0609	NaN	NaN	NaN	NaN	NaN	NaN
	0.503838	-0.245003	P18583	Protein SON	SON	23	23	17.9	263.83	73.951	29.7676	29.2216	29.6915	29.4668	29.4154	29.0634	28.5826	28.6663	29.0737	26.417	26.4504	28.4862
	0.86622	-0.244581	Q15067	Peroxisomal acyl-coenzyme A oxidase 1	ACOX1	14	14	36.7	74.423	78.545	29.4234	29.5682	29.84	29.3023	29.3346	29.461	29.8579	29.8711	29.8081	30.099	30.0084	29.8741
	1.21343	-0.243767	O75152	Zinc finger CCCH domain-containing protein 11A	ZC3H11A	13	13	26.4	89.13	53.438	28.2123	28.1795	28.4394	28.019	28.1214	27.9595	27.0813	27.0084	27.5165	NaN	NaN	27.0711
	0.720119	-0.243668	O15226	NF-kappa-B-repressing factor	NKRF	5	5	12.3	77.672	23.759	26.3376	26.228	26.417	26.3729	25.9248	25.9539	NaN	NaN	NaN	NaN	NaN	NaN
	0.577952	-0.243469	Q9Y6E2	Basic leucine zipper and W2 domain-containing protein 2	BZW2	11	10	23.2	48.162	45.412	29.4707	29.1604	29.1459	29.2935	28.995	28.7581	29.2979	28.94	29.3109	29.3153	28.9567	28.604
	1.84061	-0.242795	P78362	SRSF protein kinase 2;SRSF protein kinase 2 N-terminal;SRSF protein kinase 2 C-terminal	SRPK2	9	7	18.6	77.526	36.438	27.5969	27.5682	27.6389	27.2535	27.4394	27.3828	27.3578	26.8974	27.3662	27.4785	26.8974	26.8858
	0.351089	-0.241491	Q96J02	E3 ubiquitin-protein ligase Itchy homolog	ITCH	8	8	12.3	102.8	13.307	26.239	26.7517	26.8858	25.9716	26.5624	26.6181	26.7771	26.632	26.4457	NaN	NaN	26.2114
	0.411065	-0.241273	P30520	Adenylosuccinate synthetase isozyme 2	ADSS	15	15	44.3	50.097	91.505	31.7533	31.341	31.2814	31.6066	31.1052	30.94	31.3568	31.4234	31.2869	31.1422	30.933	30.8081
	0.510346	-0.24125	P02786	Transferrin receptor protein 1;Transferrin receptor protein 1, serum form	TFRC	20	20	32.1	84.87	308.13	31.2308	31.4581	30.8974	31.1724	30.9609	30.7292	29.8096	29.3807	29.4571	28.249	28.6595	29.3044
	0.533586	-0.241179	Q00169	Phosphatidylinositol transfer protein alpha isoform	PITPNA	9	8	47.4	31.806	31.349	27.2353	27.2535	27.726	27.3153	26.9316	27.2445	26.7895	26.8623	26.8019	26.8741	27.141	26.1642
	0.737425	-0.239886	Q6P3W7	SCY1-like protein 2	SCYL2	7	7	11.7	103.71	20.123	27.1604	27.5315	27.4707	27.3239	26.9977	27.1214	27.7195	27.6389	27.8324	27.9539	27.7195	27.3578
	0.626951	-0.239876	P08195	4F2 cell-surface antigen heavy chain	SLC3A2	17	17	33.3	67.993	152.93	31.1901	31.2759	30.7849	30.995	30.8234	30.7129	31.0544	31.13	31.2077	30.7453	30.6544	30.7533
	0.296272	-0.238921	P15923	Transcription factor E2-alpha	TCF3	3	3	13.6	67.6	31.728	26.5536	26.2114	26.1035	25.4577	26.391	26.3031	26.0609	NaN	NaN	NaN	NaN	NaN
	0.573681	-0.238521	Q05209	Tyrosine-protein phosphatase non-receptor type 12	PTPN12	13	13	25.8	88.105	133.95	29.1604	29.1507	28.9031	28.8682	29.099	28.5315	28.9677	28.6492	28.673	NaN	27.1604	28.4551
	0.516478	-0.238235	Q9Y570	Protein phosphatase methylesterase 1	PPME1	17	17	52.6	42.315	196.37	29.9539	30.2647	30.4234	29.6798	30.1115	30.1361	29.6337	29.4433	29.5754	29.8785	28.579	29.5573
	2.12296	-0.238074	P13639	Elongation factor 2	EEF2	60	59	73.1	95.337	323.31	36.4913	36.4256	36.4225	36.2914	36.1791	36.1547	36.099	35.9613	36.0892	35.6629	35.6307	35.6116
	1.0263	-0.238037	P17612	cAMP-dependent protein kinase catalytic subunit alpha	PRKACA	8	3	29.1	40.589	6.4133	27.604	27.7129	27.7581	27.2714	27.611	27.4785	27.217	NaN	27.1115	NaN	NaN	26.976
	2.07539	-0.23731	Q9Y3F4	Serine-threonine kinase receptor-associated protein	STRAP	17	17	62.6	38.438	214.13	31.3672	31.4871	31.4967	31.2647	31.1901	31.1842	31.2077	31.1842	31.2308	30.947	31.0017	30.8755
	0.387448	-0.236623	P42575	Caspase-2;Caspase-2 subunit p18;Caspase-2 subunit p13;Caspase-2 subunit p12	CASP2	12	12	39.6	50.685	39.299	28.5969	28.2891	28.1652	28.4746	28.1604	27.7064	29.2331	29.4919	29.5736	NaN	28.5609	29.019
	1.92894	-0.236598	Q14181	DNA polymerase alpha subunit B	POLA2	6	6	15.6	65.947	17.372	27.8799	27.8741	28.0349	27.6931	27.7129	27.673	NaN	26.8858	NaN	NaN	NaN	NaN
	0.730688	-0.236558	P29353	SHC-transforming protein 1	SHC1	5	5	12.9	62.821	13.567	26.5898	26.509	26.2133	26.3877	26.0854	26.1293	26.1565	NaN	26.2821	NaN	NaN	NaN
	0.895705	-0.236532	Q92600	Cell differentiation protein RCD1 homolog	RQCD1	5	5	28.8	33.631	22.459	27.726	27.8019	27.4938	27.5969	27.3828	27.3324	27.8385	27.8203	27.9814	NaN	27.5014	27.2445
	0.569044	-0.236355	Q99661	Kinesin-like protein KIF2C	KIF2C	17	16	35.6	81.312	151.71	29.94	29.5844	29.7227	29.7129	29.6128	29.2123	29.4492	29.3515	29.6948	26.8142	29.1459	28.9869
	0.997303	-0.236075	Q9H300	Presenilins-associated rhomboid-like protein, mitochondrial;P-beta	PARL	2	2	8.2	42.19	2.8705	26.7645	26.7129	26.8741	26.6865	26.3528	26.604	NaN	26.6595	NaN	26.604	NaN	26.3545
	1.44352	-0.235951	P22694	cAMP-dependent protein kinase catalytic subunit beta	PRKACB	8	3	28.8	40.622	21.51	27.9088	27.8385	27.7708	27.5463	27.7325	27.5315	NaN	NaN	26.6865	NaN	27.2353	NaN
	0.4015	-0.23571	Q9NUQ6	SPATS2-like protein	SPATS2L	17	17	46.6	61.728	116.89	29.2054	29.6372	29.6964	28.8887	29.4881	29.4551	30.2759	30.196	30.611	30.3515	30.0217	30.1483
	1.09767	-0.235184	P36507	Dual specificity mitogen-activated protein kinase kinase 2	MAP2K2	14	9	48.8	44.424	39.184	29.5844	29.7195	29.4134	29.2602	29.4254	29.326	29.3174	29.104	29.1842	29.0401	29.1795	29.0762
	0.405597	-0.234746	Q9Y266	Nuclear migration protein nudC	NUDC	14	14	45.3	38.242	32.069	31.0349	30.6713	30.4629	30.8157	30.4532	30.196	30.1724	30.0737	30.1115	30.3515	29.84	29.5898
	0.22543	-0.234622	P46821	Microtubule-associated protein 1B;MAP1B heavy chain;MAP1 light chain LC1	MAP1B	37	35	26.5	270.63	211.68	29.6303	30.3303	30.4532	29.2714	30.2308	30.2077	NaN	NaN	NaN	NaN	NaN	NaN
	1.24637	-0.234304	O95456	Proteasome assembly chaperone 1	PSMG1	6	6	34.4	32.854	12.527	29.0889	28.8858	29.019	28.6697	28.7325	28.8887	28.0453	27.8504	28.217	NaN	27.4473	27.6458
	0.894069	-0.234128	Q96C57	Uncharacterized protein C12orf43	C12orf43	4	4	24.8	28.17	15.003	26.8623	27.0084	26.8142	26.574	26.5345	26.8741	NaN	NaN	26.2909	NaN	NaN	NaN
	0.277006	-0.23396	P13473	Lysosome-associated membrane glycoprotein 2	LAMP2	4	4	13.2	44.96	6.9965	28.6285	28.3536	27.5609	28.1263	27.976	27.7389	27.3494	27.8019	27.673	27.0505	27.5898	27.8623
	0.462671	-0.233697	Q9NVD7	Alpha-parvin	PARVA	7	5	22.6	42.243	42.783	28.3745	28.8264	28.7895	28.1842	28.3662	28.7389	28.7325	28.5754	29.0686	29.2869	29.104	29.2285
	1.22775	-0.233122	Q9NY93	Probable ATP-dependent RNA helicase DDX56	DDX56	9	9	23	61.589	15.596	27.341	27.2353	27.3324	27.217	27.0609	26.9316	26.965	27.141	26.9977	26.7895	26.7517	27.141
	0.224888	-0.233027	P13612	Integrin alpha-4	ITGA4	12	12	18.5	114.9	48.313	27.7895	28.7227	28.362	27.5682	28.604	28.003	26.8142	27.1015	27.1604	NaN	NaN	26.7771
	0.821863	-0.232593	P36405	ADP-ribosylation factor-like protein 3	ARL3	8	8	64.3	20.455	80.204	29.341	29.1459	29.258	29.189	28.7895	29.0686	29.3282	29.2891	28.8945	29.4134	29.2803	29.2054
	1.48577	-0.232195	Q7KZI7	Serine/threonine-protein kinase MARK2	MARK2	8	5	17.3	87.91	14.651	27.5536	27.6251	27.5315	27.2353	27.4629	27.3153	27.5389	NaN	27.7895	NaN	27.3239	NaN
	0.611051	-0.232083	A0A024RBG1;Q9NZJ9	Diphosphoinositol polyphosphate phosphohydrolase 2	NUDT4	3	3	27.6	20.434	20.186	26.4041	26.3844	26.6181	26.0505	26.1194	26.5404	26.8623	26.9316	26.7645	27.2625	NaN	NaN
	0.316931	-0.231978	Q9H6F5	Coiled-coil domain-containing protein 86	CCDC86	4	4	20.3	40.235	26.875	26.3695	26.1642	26.1623	25.9998	25.495	26.5053	NaN	NaN	NaN	NaN	NaN	NaN
	0.812311	-0.231392	Q96KQ4	Apoptosis-stimulating of p53 protein 1	PPP1R13B	11	11	14.7	119.56	26.231	27.8504	27.7195	27.8324	27.7833	27.3494	27.5754	NaN	NaN	NaN	NaN	NaN	NaN
	0.559183	-0.230408	P08648	Integrin alpha-5;Integrin alpha-5 heavy chain;Integrin alpha-5 light chain	ITGA5	12	12	19.4	114.54	108.44	29.099	29.4881	29.3217	28.7864	29.189	29.2422	29.7373	29.5862	29.6831	29.1866	29.5844	29.6663
	0.55328	-0.22954	P49841	Glycogen synthase kinase-3 beta	GSK3B	5	5	22.6	46.744	24.042	26.5667	26.8741	26.9869	26.5754	26.3494	26.8142	26.4202	26.4769	26.673	26.558	26.3494	25.9825
	0.384649	-0.229344	P50897	Palmitoyl-protein thioesterase 1	PPT1	6	6	33	34.193	51.564	30.5481	31.0017	31.2703	30.5203	30.9746	30.6372	30.8608	30.7927	31.1544	30.6198	30.7692	31.5014
	2.5284	-0.226678	Q13509	Tubulin beta-3 chain	TUBB3	23	8	66.4	50.432	85.901	30.8755	30.8309	30.8309	30.6629	30.6372	30.5573	29.8974	29.7341	30.1604	NaN	29.4214	29.7739
	0.910565	-0.22576	Q9H9A6	Leucine-rich repeat-containing protein 40	LRRC40	15	15	35	68.249	41.808	29.389	29.104	29.1676	28.8711	28.976	29.1361	27.4551	26.6181	27.6458	26.5195	NaN	27.5014
	1.08776	-0.225678	Q8IZ73	RNA pseudouridylate synthase domain-containing protein 2	RPUSD2	4	4	18.2	61.311	54.357	26.2821	26.0087	26.0084	25.8576	25.824	25.9406	NaN	NaN	NaN	NaN	NaN	NaN
	0.543463	-0.225625	Q9UBF6	RING-box protein 2	RNF7	2	2	27.4	12.683	180.68	27.5389	27.6865	27.4862	27.4629	27.5682	27.0035	NaN	NaN	27.6458	NaN	NaN	NaN
	0.225653	-0.225482	Q7L775	EPM2A-interacting protein 1	EPM2AIP1	15	15	32.1	70.369	28.397	27.5969	27.9146	28.5128	27.217	28.1065	28.0243	28.2353	27.9705	28.1065	28.217	27.8799	27.8858
	0.192201	-0.225454	Q9Y6C2	EMILIN-1	EMILIN1	33	33	53.6	106.69	323.31	32.7413	32.2106	31.9081	32.8023	31.8196	31.5618	32.6198	32.5709	32.2979	32.4284	32.0864	31.5664
	0.891063	-0.22421	P67809	Nuclease-sensitive element-binding protein 1	YBX1	19	14	69.4	35.924	323.31	33.2164	33.3956	33.0479	33.1115	32.9695	32.9063	32.7613	32.5062	32.7494	33.0233	32.6044	32.3061
	1.23273	-0.223696	Q9BXJ9	N-alpha-acetyltransferase 15, NatA auxiliary subunit	NAA15	30	26	42.4	101.27	151.4	31.1842	31.1177	31.0217	31.0217	30.7849	30.846	30.8608	30.8234	30.933	30.7849	30.5573	30.6458
	0.923121	-0.22362	Q9Y224	UPF0568 protein C14orf166	C14orf166	18	18	70.5	28.068	192.72	31.6285	31.5296	31.2703	31.2814	31.2979	31.1783	30.6629	30.7453	30.6372	30.5844	30.6881	30.7129
	0.601098	-0.223115	P36915	Guanine nucleotide-binding protein-like 1	GNL1	9	9	19.3	68.66	23.974	28.1015	28.066	27.8445	28.0557	27.726	27.5609	28.8682	28.6697	29.1628	29.203	28.9344	28.8711
	1.695	-0.222986	P11940	Polyadenylate-binding protein 1	PABPC1	31	22	64.2	70.67	283.79	34.1529	34.1828	34.0911	33.9848	33.9591	33.8138	33.9591	33.9591	33.9242	33.9063	33.7252	33.6198
	0.862864	-0.22259	Q9H223	EH domain-containing protein 4	EHD4	11	9	28.8	61.174	18.298	27.8504	28.0813	27.8504	27.5682	27.8799	27.6663	NaN	NaN	27.6527	NaN	NaN	27.6458
	0.706584	-0.221813	Q99543	DnaJ homolog subfamily C member 2;DnaJ homolog subfamily C member 2, N-terminally processed	DNAJC2	9	9	20.8	71.996	72.495	28.4473	28.0914	28.1507	27.8264	28.0762	28.1214	27.6998	NaN	27.9088	28.141	27.632	27.9595
	1.39675	-0.221513	P49023	Paxillin	PXN	9	9	26.2	64.505	33.165	27.8564	28.1015	27.9484	27.7833	27.7195	27.7389	NaN	NaN	27.6798	NaN	NaN	NaN
	2.76447	-0.22146	P36873	Serine/threonine-protein phosphatase PP1-gamma catalytic subunit	PPP1CC	18	4	63.8	36.983	75.398	29.2979	29.3217	29.3683	29.099	29.0762	29.1483	29.4073	29.3869	29.3536	29.6764	29.2913	29.2262
	0.858926	-0.22037	Q9NR30	Nucleolar RNA helicase 2	DDX21	31	29	47.1	87.343	242.32	31.8901	31.4871	31.6713	31.5109	31.4234	31.4532	31.0609	31.3356	31.2308	31.0414	30.6285	30.9882
	0.270704	-0.220133	Q14197	Peptidyl-tRNA hydrolase ICT1, mitochondrial	ICT1	3	3	22.3	23.63	5.1791	26.3031	25.7695	25.9428	25.2716	25.8264	26.2571	26.1546	26.509	NaN	NaN	NaN	26.8623
	1.13775	-0.220027	O75116	Rho-associated protein kinase 2	ROCK2	28	26	28.7	160.9	118.44	29.0003	29.0427	29.0401	28.632	28.8623	28.9287	29.7453	29.8264	29.4032	30.1483	29.8667	29.3971
	1.92232	-0.219687	Q8IUR7	Armadillo repeat-containing protein 8	ARMC8	16	16	32.7	75.509	112.61	28.5969	28.4938	28.5969	28.4073	28.341	28.2803	28.5898	28.7802	28.7549	28.9841	28.632	28.4746
	0.4983	-0.21963	Q9BZL6	Serine/threonine-protein kinase D2	PRKD2	19	16	35.2	96.721	60.105	29.588	29.5407	29.3828	29.6475	29.1263	29.0788	28.6964	28.3578	29.196	26.6865	28.1115	28.4938
	0.500879	-0.219175	Q9UBB4	Ataxin-10	ATXN10	13	13	40.4	53.488	68.419	29.2692	29.0914	28.9117	29.1604	28.8504	28.604	29.2422	29.3641	29.0711	29.1747	28.8945	28.7129
	1.45999	-0.218769	Q9NW64	Pre-mRNA-splicing factor RBM22	RBM22	10	10	33.3	46.895	112.59	28.5014	28.5426	28.6865	28.2891	28.3536	28.4314	27.9814	27.7708	27.9428	27.2891	27.5014	28.2262
	0.735666	-0.218756	Q9Y3B4	Splicing factor 3B subunit 6	SF3B6	5	5	48	14.585	10.187	28.8234	28.6389	28.8741	28.5463	28.3662	28.7676	28.4862	28.5352	28.3662	28.7227	28.6251	28.9316
	3.69745	-0.217063	O15372	Eukaryotic translation initiation factor 3 subunit H	EIF3H	17	17	62.2	39.93	38.779	30.393	30.362	30.341	30.1483	30.1604	30.1361	30.1361	30.0217	30.0217	29.2123	29.7195	29.995
	0.186639	-0.216623	P08670	Vimentin	VIM	52	48	85.4	53.651	323.31	35.595	36.3568	36.365	35.1641	36.2549	36.2478	34.7453	34.7252	35.043	34.78	34.6198	34.5584
	0.613776	-0.216012	P42224	Signal transducer and activator of transcription 1-alpha/beta	STAT1	25	25	41.3	87.334	108.77	30.6964	30.8004	30.9539	30.3303	30.6798	30.7927	31.4384	31.4919	31.0673	30.7692	30.8157	30.6544
	1.05035	-0.215653	P52943	Cysteine-rich protein 2	CRIP2	5	5	49.5	22.492	73.417	31.9188	31.7211	31.7533	31.4384	31.6881	31.6198	31.6458	31.0864	32.0927	29.5352	29.8872	30.9188
	1.05223	-0.214998	Q00653	Nuclear factor NF-kappa-B p100 subunit;Nuclear factor NF-kappa-B p52 subunit	NFKB2	6	6	13.3	96.748	13.113	26.9428	27.1795	27.2353	26.9539	26.8385	26.9203	26.8264	NaN	27.0609	NaN	NaN	26.4504
	0.20391	-0.214507	Q96CX2	BTB/POZ domain-containing protein KCTD12	KCTD12	20	20	72	35.7	229.43	32.6586	33.3828	33.3568	32.2591	33.2336	33.2619	33.0479	32.8865	32.9312	32.9505	32.7026	32.7653
	2.44374	-0.214112	P51116	Fragile X mental retardation syndrome-related protein 2	FXR2	14	12	28.5	74.222	157.52	28.9869	29.0296	28.9677	28.8324	28.7292	28.7802	28.3662	28.1795	28.2803	NaN	27.9595	28.0864
	1.75983	-0.214036	P51114	Fragile X mental retardation syndrome-related protein 1	FXR1	26	25	51.4	69.72	282.88	32.3061	32.2478	32.1544	32.0864	31.995	31.9848	31.6964	31.6839	31.9188	31.5389	31.5014	31.6198
	0.431038	-0.213937	P37198	Nuclear pore glycoprotein p62	NUP62	10	10	25.1	53.254	58.548	28.249	28.1164	28.1937	28.2399	27.5609	28.1164	28.5052	28.7581	28.3992	28.5609	28.1984	28.509
	0.360059	-0.21393	P28288	ATP-binding cassette sub-family D member 3	ABCD3	13	13	25	75.475	41.191	28.6285	29.141	29.1771	28.5203	28.6831	29.1015	28.6998	28.8264	28.9539	28.9732	28.94	28.8234
	0.475359	-0.213719	Q9Y5K8	V-type proton ATPase subunit D	ATP6V1D	4	4	32	28.262	9.7583	26.7771	26.4122	26.2408	26.4661	26.2517	26.0711	26.7895	26.9088	27.17	NaN	NaN	26.6998
	0.658321	-0.213701	P78406	mRNA export factor	RAE1	12	12	49.7	40.968	74.45	29.4032	29.2147	29.3153	29.3704	28.9622	28.9595	28.8564	28.6865	28.8974	28.2077	28.7227	28.9677
	0.32644	-0.213131	Q9UI30	Multifunctional methyltransferase subunit TRM112-like protein	TRMT112	4	4	38.4	14.199	50.605	30.1842	29.5627	30.2535	29.8974	29.4823	29.9814	NaN	29.0479	29.2353	29.4294	NaN	29.2891
	1.15827	-0.212783	Q8NC51	Plasminogen activator inhibitor 1 RNA-binding protein	SERBP1	14	14	35.5	44.965	175.84	32.0479	31.8937	31.9574	31.8682	31.6154	31.7771	31.6066	31.3828	31.5109	31.0927	31.1544	31.2365
	0.706483	-0.212671	P07942	Laminin subunit beta-1	LAMB1	41	41	34.7	198.04	323.31	32.7731	32.9347	32.6839	32.5343	32.8062	32.4134	32.1634	32.2222	32.3672	32.1544	32.0673	32.0017
	1.7304	-0.21176	Q14157	Ubiquitin-associated protein 2-like	UBAP2L	18	18	31.4	114.53	323.31	31.1842	31.0544	31.015	30.8974	30.8309	30.8901	30.8385	30.8004	31.08	30.5014	30.6881	30.6458
	0.533745	-0.210735	Q8WVQ1	Soluble calcium-activated nucleotidase 1	CANT1	8	8	32.7	44.839	9.0452	26.2299	26.0169	26.3828	26.2679	25.8106	25.9189	NaN	26.4583	26.3066	NaN	NaN	NaN
	0.182231	-0.210216	P48426	Phosphatidylinositol 5-phosphate 4-kinase type-2 alpha	PIP4K2A	6	4	12.8	46.224	20.782	26.6595	26.604	25.945	26.7771	26.3066	25.4942	26.4661	26.5165	26.518	NaN	26.6595	26.4394
	0.436486	-0.210081	Q8N543	Prolyl 3-hydroxylase OGFOD1	OGFOD1	12	12	32.3	63.245	44.132	28.4234	28.0813	28.2847	28.3992	27.7895	27.9705	28.0243	27.7453	28.1459	27.7833	27.1795	27.7517
	1.52488	-0.209668	Q9C0C9	E2/E3 hybrid ubiquitin-protein ligase UBE2O	UBE2O	24	24	29.3	141.29	62.294	29.249	29.2825	29.4354	29.0583	29.1386	29.141	29.6848	29.6544	29.6441	28.8415	29.2891	29.0453
	0.844263	-0.209502	Q8NFD5	AT-rich interactive domain-containing protein 1B	ARID1B	7	5	6.8	236.12	17.948	26.2625	26.3943	26.0422	26.1234	25.9473	25.9998	NaN	NaN	NaN	NaN	NaN	NaN
	0.943739	-0.208605	P61353	60S ribosomal protein L27	RPL27	7	7	48.5	15.798	27.078	31.9643	31.6501	31.8755	31.5481	31.7006	31.6154	31.8385	31.9505	31.9539	31.015	31.781	32.0414
	0.39848	-0.208274	Q9BV57	1,2-dihydroxy-3-keto-5-methylthiopentene dioxygenase	ADI1	5	5	41.3	21.498	39.397	28.3787	27.8916	28.1747	28.1795	27.611	28.0296	27.8324	27.8264	27.5315	NaN	27.5898	27.7581
	0.769513	-0.207956	Q8IWA4	Mitofusin-1	MFN1	9	8	18.4	84.159	32.163	26.7771	26.8019	26.7645	26.5029	26.8142	26.4024	27.2714	27.0296	27.6865	26.8264	NaN	27.2714
	0.160367	-0.207754	P49454	Centromere protein F	CENPF	26	25	11.4	357.52	60.36	28.0914	27.8019	27.4394	28.4512	27.2714	26.9869	NaN	NaN	NaN	NaN	NaN	NaN
	0.347346	-0.207672	Q8WZ82	Ovarian cancer-associated gene 2 protein	OVCA2	9	9	69.2	24.418	29.167	28.6355	28.7129	29.0583	28.1747	28.7645	28.8445	28.6389	28.066	28.2308	NaN	28.3196	28.5165
	0.172797	-0.206662	Q9UHB6	LIM domain and actin-binding protein 1	LIMA1	25	25	45.1	85.225	146.66	30.9188	31.6415	31.717	30.4727	31.5389	31.6458	30.7292	30.6544	31.3776	29.0813	30.0217	30.5389
	0.537734	-0.205643	Q15843	NEDD8	NEDD8	3	3	34.6	9.0714	51.407	27.8741	27.9316	28.1984	27.9428	27.524	27.9203	27.6931	27.6798	27.7645	NaN	28.0609	27.6798
	0.716843	-0.204974	Q05639	Elongation factor 1-alpha 2	EEF1A2	20	7	62.6	50.47	17.261	28.3704	28.7031	28.5609	28.49	28.1842	28.3452	28.0349	NaN	28.189	NaN	28.1795	28.1459
	0.543441	-0.204654	P53814	Smoothelin	SMTN	18	18	30.5	99.058	190.81	29.4354	29.5463	29.5754	29.6075	29.2825	29.0531	29.141	29.1312	29.4492	28.7453	28.3662	28.5463
	1.02642	-0.204615	C9JLW8	Protein FAM195B	FAM195B	4	4	57.7	10.92	14.159	28.0762	28.2445	28.2308	27.8385	27.9977	28.1015	27.4073	NaN	NaN	27.5389	27.17	27.1312
	0.777498	-0.204196	Q96FX7	tRNA (adenine(58)-N(1))-methyltransferase catalytic subunit TRMT61A	TRMT61A	6	6	34.9	31.381	15.67	27.3324	27.2891	27.5609	27.17	27.0505	27.3494	26.6458	NaN	NaN	NaN	26.1391	NaN
	1.44912	-0.2029	P24941	Cyclin-dependent kinase 2	CDK2	12	10	55.7	33.929	21.879	29.3599	29.3088	29.4093	29.1676	29.2512	29.0505	29.537	29.5128	29.5969	NaN	29.362	29.524
	1.13569	-0.202422	Q8WUA2	Peptidyl-prolyl cis-trans isomerase-like 4	PPIL4	8	8	18.9	57.224	6.4682	27.4073	27.2262	27.3992	27.0505	27.2535	27.1214	NaN	NaN	NaN	26.7771	26.8974	NaN
	0.506417	-0.202264	Q7Z3U7	Protein MON2 homolog	MON2	11	11	7.3	190.36	36.719	27.019	26.9977	27.1015	26.4953	26.976	27.0401	27.5969	27.6251	27.1604	26.8142	26.9088	26.9088
	0.235597	-0.201242	O00159	Unconventional myosin-Ic	MYO1C	28	28	37.4	121.68	184.21	30.3088	31.0084	31.015	30.099	30.7613	30.8682	30.7211	30.8081	30.8829	30.995	30.7047	30.9117
	2.33463	-0.201213	Q99961	Endophilin-A2	SH3GL1	11	11	38.9	41.489	98.538	30.362	30.4032	30.4727	30.1842	30.2308	30.2193	30.4919	30.5481	30.3724	29.9539	29.8697	29.893
	0.79992	-0.201132	Q99848	Probable rRNA-processing protein EBP2	EBNA1BP2	6	6	27.1	34.852	19.93	29.3388	29.0839	29.1337	29.1556	28.9146	28.8829	28.6998	28.9344	29.2054	28.8623	28.8355	28.8081
	0.169893	-0.200679	P78559	Microtubule-associated protein 1A;MAP1A heavy chain;MAP1 light chain LC2	MAP1A	47	45	25.3	305.48	180.69	30.341	30.6629	31.0414	29.7195	30.6629	31.0609	30.3828	30.4134	30.2647	29.7927	30.0609	30.3088
	2.53304	-0.200342	O00629	Importin subunit alpha-3	KPNA4	10	8	38.8	57.886	178.3	29.267	29.2803	29.1819	29.0401	29.0479	29.0401	28.3494	28.6251	28.7389	27.976	28.217	28.0557
	0.495826	-0.199793	Q13439	Golgin subfamily A member 4	GOLGA4	29	29	18.2	261.14	323.31	28.5754	28.1164	28.2935	28.1065	27.9428	28.3367	26.9869	NaN	26.632	NaN	NaN	24.8385
	0.24362	-0.199354	P80723	Brain acid soluble protein 1	BASP1	20	20	89.9	22.693	323.31	34.0017	34.6253	34.043	33.6839	34.5179	33.87	33.4458	33.5179	33.9242	34.3101	33.8422	34.2336
	0.392014	-0.198441	Q9UHD1	Cysteine and histidine-rich domain-containing protein 1	CHORDC1	13	13	53.9	37.489	146.35	31.8119	31.9539	31.5664	31.7965	31.7211	31.2193	30.6544	30.7047	30.8157	29.8785	30.4334	30.3303
	0.62967	-0.19757	Q92995	Ubiquitin carboxyl-terminal hydrolase 13	USP13	16	12	23.5	97.326	24.137	28.3452	28.362	28.6629	28.0711	28.3153	28.391	NaN	NaN	NaN	NaN	NaN	NaN
	0.309697	-0.196667	P12814	Alpha-actinin-1	ACTN1	56	38	74.1	103.06	323.31	33.3033	33.8792	33.7252	33.0592	33.6944	33.5641	32.7474	32.8774	33.3169	33.1407	32.8157	33.0512
	0.477157	-0.196525	Q9BY77	Polymerase delta-interacting protein 3	POLDIP3	7	7	27.1	46.089	18.941	27.8623	27.4473	27.3324	27.4938	27.3324	27.2262	NaN	NaN	26.604	NaN	NaN	NaN
	0.66817	-0.196499	Q9UBS4	DnaJ homolog subfamily B member 11	DNAJB11	11	11	36	40.513	164.92	31.2924	31.3196	31.0479	31.1544	31.0927	30.8234	31.3196	31.4678	31.2924	31.8608	31.5062	31.2647
	1.33302	-0.196029	P55196	Afadin	MLLT4	29	29	26.6	206.8	91.196	29.3992	29.6303	29.5147	29.2913	29.3494	29.3153	28.6389	28.6697	28.4551	28.7389	28.805	28.6629
	0.38684	-0.196024	Q8TD16	Protein bicaudal D homolog 2	BICD2	9	9	17.7	93.532	44.106	25.6676	26.0793	25.4831	25.7619	25.3454	25.5346	26.1642	26.1546	26.0169	NaN	25.6181	NaN
	0.465777	-0.195896	Q14137	Ribosome biogenesis protein BOP1	BOP1	14	14	33.2	83.629	43.766	28.6831	28.1015	28.3367	28.3109	28.0914	28.1312	27.7581	27.341	27.9539	27.8858	27.217	27.509
	0.246559	-0.195707	Q68CZ2	Tensin-3	TNS3	31	30	43.3	155.26	208.38	31.225	31.7888	31.9677	31.0283	31.6329	31.7333	30.5933	30.3515	30.9188	29.8203	30.4629	30.7047
	1.36075	-0.195639	P41223	Protein BUD31 homolog	BUD31	9	9	53.5	17	51.88	29.4649	29.3324	29.4274	29.2979	29.1115	29.2285	29.2077	29.2007	29.3174	29.2957	29.2007	29.1239
	1.77537	-0.195374	Q96B54	Zinc finger protein 428	ZNF428	3	3	23.9	20.48	22.083	27.9595	28.0864	28.0965	27.8504	27.8916	27.8142	NaN	NaN	NaN	NaN	NaN	27.217
	0.201057	-0.195018	P43490	Nicotinamide phosphoribosyltransferase	NAMPT	17	17	51.1	55.52	30.293	29.5165	28.9259	28.6697	29.3303	28.8264	28.3704	28.7227	28.8623	28.5573	28.2535	28.7096	28.6798
	1.02138	-0.194462	O00571;O15523	ATP-dependent RNA helicase DDX3X;ATP-dependent RNA helicase DDX3Y	DDX3X;DDX3Y	33	30	60.7	73.243	161.57	32.5504	32.4727	32.5709	32.4991	32.2164	32.2952	32.1901	31.9435	32.1544	31.8974	31.781	31.8497
	0.448145	-0.19422	P26358	DNA (cytosine-5)-methyltransferase 1	DNMT1	17	17	14.1	183.16	33.027	27.6595	27.0609	27.5682	27.217	27.2445	27.2445	27.8564	28.1115	28.2353	27.5315	27.632	27.6527
	0.874993	-0.194038	P18031	Tyrosine-protein phosphatase non-receptor type 1	PTPN1	11	11	40.9	49.966	59.477	27.1795	27.4073	27.0813	27.1015	26.9977	26.9869	27.3992	27.4073	27.5536	28.0084	NaN	27.3578
	0.64715	-0.193622	P18621	60S ribosomal protein L17	RPL17	9	9	44	21.397	51.715	31.4234	31.0609	31.2703	31.0017	30.947	31.225	30.8534	31.2647	31.3724	31.2924	31.3463	31.5754
	0.258081	-0.193339	Q9Y6A5	Transforming acidic coiled-coil-containing protein 3	TACC3	10	10	22.9	90.359	33.769	28.0084	27.5389	27.3992	27.8799	27.4154	27.0711	27.9146	27.524	28.1984	NaN	NaN	26.8385
	1.793	-0.1929	Q6DKJ4	Nucleoredoxin	NXN	14	14	48.3	48.392	89.256	29.4804	29.5259	29.6372	29.3367	29.3494	29.3787	29.7453	29.788	29.6128	30.0217	29.6407	29.3153
	2.58229	-0.192813	P15170	Eukaryotic peptide chain release factor GTP-binding subunit ERF3A	GSPT1	19	12	41.7	55.755	76.153	30.7849	30.7849	30.7692	30.5844	30.5389	30.6372	31.1483	31.0283	31.0864	31.0349	30.9677	30.7692
	0.606551	-0.19277	Q7L576	Cytoplasmic FMR1-interacting protein 1	CYFIP1	17	11	17.8	145.18	38.812	28.1984	28.3787	28.003	28.1842	27.8916	27.9259	28.8264	28.9146	28.877	28.8974	29.0813	28.7895
	1.35745	-0.192768	Q01970	1-phosphatidylinositol 4,5-bisphosphate phosphodiesterase beta-3	PLCB3	17	17	19.6	138.8	68.931	28.6798	28.604	28.4551	28.3992	28.3869	28.3745	28.6458	28.4512	28.3662	27.8858	28.0813	28.2625
	0.672288	-0.192695	P46778	60S ribosomal protein L21	RPL21	4	4	31.9	18.565	34.128	31.4083	31.2535	31.4967	31.1177	31.0544	31.4083	30.9814	31.2703	31.4433	31.1361	30.947	31.6881
	1.06595	-0.1922	Q9BTY7	Protein HGH1 homolog	HGH1	13	13	52.1	42.129	73.353	29.4032	29.5573	29.5165	29.2445	29.2147	29.4413	28.9512	28.6527	28.8887	28.0762	28.217	28.3109
	0.530242	-0.191783	Q9NX62	Inositol monophosphatase 3	IMPAD1	7	7	25.3	38.681	30.886	28.3494	28.6931	28.6492	28.141	28.5203	28.4551	28.459	28.9146	28.5128	NaN	28.341	28.4194
	0.502066	-0.191636	O95340	Bifunctional 3-phosphoadenosine 5-phosphosulfate synthase 2;Sulfate adenylyltransferase;Adenylyl-sulfate kinase	PAPSS2	10	9	23.3	69.5	111.59	29.0349	29.203	29.3282	28.726	29.0505	29.2147	30.2979	30.2308	30.1361	29.995	29.7849	30.0609
	0.427433	-0.191387	P62424	60S ribosomal protein L7a	RPL7A	16	16	51.9	29.995	75.969	32.8215	32.3033	32.7533	32.2535	32.6022	32.4483	32.6437	32.7533	32.6586	33.4209	33.196	33.2336
	0.331117	-0.19107	Q5T0D9	Tumor protein p63-regulated gene 1-like protein	TPRG1L	3	3	23.5	30.211	33.132	26.604	26.673	26.4738	26.6998	26.5364	25.9415	26.5754	26.632	26.673	NaN	26.3511	26.4769
	1.72735	-0.190409	O94804	Serine/threonine-protein kinase 10	STK10	8	7	12.7	112.13	49.665	26.8741	26.9869	26.8858	26.7389	26.6595	26.7771	NaN	NaN	26.5419	NaN	NaN	26.6458
	0.149731	-0.190225	Q9BZG8	Diphthamide biosynthesis protein 1	DPH1	2	2	9	48.805	12.919	26.4077	25.0359	25.2658	25.7645	25.0401	25.3342	25.3342	25.1055	NaN	NaN	NaN	24.9672
	0.613965	-0.18902	Q9BV86	N-terminal Xaa-Pro-Lys N-methyltransferase 1;N-terminal Xaa-Pro-Lys N-methyltransferase 1, N-terminally processed	NTMT1	5	5	25.1	25.387	119.48	27.7389	27.3324	27.6527	27.4394	27.2625	27.4551	28.0813	28.141	28.2891	28.3494	27.9259	27.8445
	1.98588	-0.188749	P49770	Translation initiation factor eIF-2B subunit beta	EIF2B2	9	9	32.2	38.989	24.655	28.6216	28.5203	28.6458	28.4354	28.4032	28.3828	28.7486	28.6075	28.7064	28.6355	28.6898	28.4433
	0.978892	-0.18855	P62081	40S ribosomal protein S7	RPS7	12	12	58.8	22.127	118.23	32.7373	32.6985	32.8119	32.5296	32.7191	32.4334	32.3006	32.3223	32.5085	32.2393	32.3115	32.6394
	0.589768	-0.188323	Q9BU76	Multiple myeloma tumor-associated protein 2	MMTAG2	4	4	20.9	29.411	4.8405	26.8974	26.8504	26.6458	26.8019	26.6373	26.3894	NaN	NaN	NaN	NaN	NaN	NaN
	0.429057	-0.188207	P50552	Vasodilator-stimulated phosphoprotein	VASP	17	17	45.5	39.829	144.23	30.5844	30.8829	30.9746	30.341	30.7129	30.8234	30.6198	30.6372	31.1052	30.2647	30.393	30.5573
	0.900373	-0.188183	P61289	Proteasome activator complex subunit 3	PSME3	7	7	29.9	29.506	51.63	30.1239	29.9677	30.0609	29.9814	29.6948	29.9117	29.8755	29.6005	29.5933	29.5518	29.3196	29.5481
	0.590268	-0.187977	Q6ZT62;Q9Y3L3	SH3 domain-binding protein 1	SH3BP1	11	11	25.6	73.599	28.224	27.3828	27.5969	27.8504	27.4314	27.341	27.4938	26.7771	NaN	NaN	NaN	NaN	27.0084
	0.774809	-0.187455	Q13043	Serine/threonine-protein kinase 4;Serine/threonine-protein kinase 4 37kDa subunit;Serine/threonine-protein kinase 4 18kDa subunit	STK4	8	4	24.8	55.63	10.363	25.8142	25.726	25.6458	25.3811	25.726	25.5165	NaN	NaN	NaN	NaN	25.5638	NaN
	0.194774	-0.187032	Q5ZPR3	CD276 antigen	CD276	2	2	8.2	57.235	261.03	26.5463	27.604	26.7645	26.5359	27.1312	26.6865	NaN	NaN	NaN	NaN	NaN	NaN
	1.03649	-0.186673	Q96KB5	Lymphokine-activated killer T-cell-originated protein kinase	PBK	5	5	32.3	36.085	10.041	28.6798	28.7096	28.579	28.3282	28.4976	28.5826	27.3578	NaN	27.4862	NaN	NaN	NaN
	0.788119	-0.186651	Q9NP58	ATP-binding cassette sub-family B member 6, mitochondrial	ABCB6	9	9	19.8	93.884	41.042	27.1984	27.141	27.189	26.9316	27.1984	26.8385	27.7453	27.8504	27.611	28.1065	28.1214	27.9203
	0.771376	-0.186344	Q13637	Ras-related protein Rab-32	RAB32	7	6	45.8	24.997	37.143	28.6146	28.2399	28.4274	28.2625	28.2714	28.189	27.6181	27.7517	27.8741	28.0084	27.7833	27.5389
	0.485171	-0.185898	Q13017	Rho GTPase-activating protein 5	ARHGAP5	9	9	9.5	172.46	14.133	26.5898	26.7895	26.8142	26.3376	26.4598	26.8385	26.452	NaN	26.7771	NaN	NaN	NaN
	0.480898	-0.185571	Q6NZY4	Zinc finger CCHC domain-containing protein 8	ZCCHC8	14	14	36.8	78.576	293.73	28.55	28.8203	29.0375	28.4668	28.604	28.7802	28.6492	28.3662	28.55	27.2714	27.9869	28.0864
	0.537047	-0.185328	Q9BTD8	RNA-binding protein 42	RBM42	4	4	15.8	50.413	58.841	26.9869	26.7129	26.9869	26.7517	26.4815	26.8974	NaN	NaN	NaN	NaN	NaN	NaN
	0.924765	-0.185017	P46937	Transcriptional coactivator YAP1	YAP1	7	7	30.6	54.461	53.582	27.4314	27.7195	27.5898	27.391	27.3239	27.4707	NaN	NaN	27.7895	NaN	NaN	27.2077
	1.70785	-0.184764	P84077;P61204	ADP-ribosylation factor 1;ADP-ribosylation factor 3	ARF1;ARF3	9	5	69.6	20.697	26.547	31.8829	31.8755	31.7453	31.6198	31.6881	31.6415	32.4556	31.9746	31.9677	30.7692	30.2308	31.5664
	1.54293	-0.184655	Q9ULV4	Coronin-1C	CORO1C	11	11	31.9	53.248	55.055	31.1783	31.1483	31.2759	30.9609	31.0927	30.995	30.8901	30.8234	31.2135	30.5109	30.8901	31.0017
	1.15938	-0.184193	Q9NP72	Ras-related protein Rab-18	RAB18	8	8	51.9	22.977	28.279	29.6303	29.6233	29.7453	29.362	29.5071	29.5772	29.3153	29.3303	29.4919	29.2557	29.1361	28.9567
	0.671838	-0.184103	P18085	ADP-ribosylation factor 4	ARF4	9	6	64.4	20.511	12.329	29.611	29.94	29.8127	29.4512	29.7178	29.6424	30.0737	30.2193	30.1483	29.6612	30.0479	29.8355
	1.26106	-0.183578	P41227	N-alpha-acetyltransferase 10	NAA10	9	9	63	26.458	116.58	29.8814	29.7864	29.8534	29.6948	29.5352	29.7405	29.5014	29.3153	29.5109	28.9732	28.8173	29.2376
	0.304192	-0.183229	Q96T51	RUN and FYVE domain-containing protein 1	RUFY1	11	11	25.1	79.817	54.421	28.0349	28.1795	27.7645	27.604	28.2353	27.5898	29.066	29.1507	29.3848	28.9869	28.9344	29.099
	1.05403	-0.183219	Q9NR50	Translation initiation factor eIF-2B subunit gamma	EIF2B3	8	8	26.8	50.24	61.679	28.8887	28.9146	29.0401	28.8142	28.632	28.8474	29.1937	28.965	29.1337	27.4862	28.5315	29.0634
	1.04587	-0.182749	P06280	Alpha-galactosidase A	GLA	8	8	24.7	48.766	95.085	28.8711	28.8916	29.0217	28.6561	28.877	28.7031	27.965	28.1263	27.9814	27.8799	28.2625	28.3951
	0.390215	-0.182185	Q8TEX9	Importin-4	IPO4	17	17	23.8	118.71	51.434	28.8294	28.3787	28.5573	28.5933	28.1164	28.509	28.4976	28.6181	28.5203	28.141	28.0557	27.9146
	0.233504	-0.182096	Q9Y3E0	Vesicle transport protein GOT1B	GOLT1B	4	4	26.8	15.425	12.248	26.7129	26.7517	26.9316	26.976	26.0236	26.8504	27.4234	27.3662	27.4473	28.1507	28.0711	28.0864
	0.845911	-0.181908	O15027	Protein transport protein Sec16A	SEC16A	28	28	23	251.89	314.15	29.2308	29.5296	29.3869	29.1015	29.2647	29.2353	29.6146	29.2535	29.8294	29.1937	28.9372	29.2123
	0.57849	-0.181756	P35998	26S protease regulatory subunit 7	PSMC2	30	30	68.1	48.633	323.31	32.3006	32.5956	32.686	32.1901	32.4284	32.4184	31.7373	31.6964	31.7731	32.0544	31.7771	31.7771
	0.41559	-0.18141	Q9Y646	Carboxypeptidase Q	CPQ	7	7	22.5	51.887	60.689	27.391	26.7645	27.0084	26.9428	26.8264	26.8504	28.5203	28.4976	27.9595	28.8203	28.7927	28.3869
	0.400979	-0.181396	Q15642	Cdc42-interacting protein 4	TRIP10	9	9	26.5	68.351	323.31	27.7195	28.258	27.7453	27.7325	27.8564	27.5898	28.1312	28.2979	28.2891	27.8203	28.0965	28.0243
	0.650062	-0.181376	O60884	DnaJ homolog subfamily A member 2	DNAJA2	15	15	53.6	45.745	109.6	30.6713	30.4334	30.4823	30.5296	30.341	30.1724	30.1842	30.341	30.2535	30.3724	30.1724	30.2422
	0.940957	-0.18088	Q96BN8	Ubiquitin thioesterase otulin	OTULIN	9	9	43.5	40.262	22.318	28.6458	28.5536	28.3828	28.267	28.4274	28.3452	28.6561	28.4823	28.5898	27.8445	28.3452	28.3787
	0.572736	-0.179852	O60232	Sjoegren syndrome/scleroderma autoantigen 1	SSSCA1	7	7	69.8	21.474	32.671	29.1189	29.1189	28.9117	28.9677	29.0137	28.6285	28.7129	28.5463	28.5536	NaN	27.6865	28.0505
	0.782442	-0.179521	Q6IN85	Serine/threonine-protein phosphatase 4 regulatory subunit 3A	SMEK1	17	13	29.5	95.367	78.167	31.1724	31.1901	31.341	30.947	30.9814	31.2365	30.7373	30.6458	31.0673	31.0084	30.4823	30.2077
	1.23972	-0.179341	O94822	E3 ubiquitin-protein ligase listerin	LTN1	36	36	25.3	200.55	181.17	30.933	31.0864	30.9609	30.7613	30.7692	30.9117	30.8755	30.8608	30.8309	30.3088	30.7373	30.4823
	0.505845	-0.178828	Q96B36	Proline-rich AKT1 substrate 1	AKT1S1	3	3	22.7	27.383	12.224	26.604	26.3307	26.6595	26.4754	26.4629	26.1194	26.5492	26.8142	26.4409	26.3307	NaN	25.9383
	0.638941	-0.178455	Q2M2I8	AP2-associated protein kinase 1	AAK1	17	16	26.4	103.88	208.3	28.5754	28.8324	28.8829	28.4274	28.6216	28.7064	28.7771	28.6998	28.8829	28.2759	28.3745	28.5315
	2.02129	-0.177875	Q92973	Transportin-1	TNPO1	28	24	41.3	102.35	323.31	31.7373	31.8271	31.7129	31.6066	31.5844	31.5527	31.6798	31.7047	31.717	31.846	31.7849	31.6629
	1.00504	-0.176606	Q07157	Tight junction protein ZO-1	TJP1	11	11	11.4	195.46	75.68	27.5754	27.7195	27.8019	27.4938	27.4551	27.6181	27.9031	28.2077	28.0243	NaN	NaN	27.8858
	0.655276	-0.175638	O60739	Eukaryotic translation initiation factor 1b	EIF1B	8	3	80.5	12.823	55.068	29.8264	29.6781	29.6285	29.7357	29.3766	29.4938	28.9002	29.1747	29.1312	28.9622	28.7802	28.9841
	0.28841	-0.175482	Q9H0W5	Coiled-coil domain-containing protein 8	CCDC8	11	11	41.3	59.374	120.55	28.9787	29.5646	29.49	28.8445	29.3557	29.3066	28.579	28.3324	28.632	27.604	28.1361	28.258
	0.724748	-0.175191	Q8NHH9	Atlastin-2	ATL2	9	9	20.6	66.228	17.711	27.2891	27.2803	27.3153	26.9088	27.2803	27.17	27.189	27.1507	27.019	NaN	NaN	25.9271
	0.574348	-0.174941	Q92734	Protein TFG	TFG	10	10	38.8	43.447	268.77	29.5969	29.7676	29.6198	29.2422	29.651	29.5664	29.459	29.5627	29.5772	29.6285	29.3683	29.2736
	1.9454	-0.174488	P26196	Probable ATP-dependent RNA helicase DDX6	DDX6	21	21	58.2	54.416	227.53	30.8309	30.7613	30.8234	30.6713	30.6544	30.5664	30.9882	30.947	30.995	31.0927	30.9814	30.9609
	0.898041	-0.174011	Q9UJW0	Dynactin subunit 4	DCTN4	14	14	51.5	52.337	98.607	29.6629	29.6998	29.7096	29.3388	29.5933	29.6181	29.109	29.2736	29.3536	29.6998	29.2054	29.2193
	0.661131	-0.173936	Q15050	Ribosome biogenesis regulatory protein homolog	RRS1	7	7	30.7	41.193	128.48	27.8623	27.7195	27.7895	27.7895	27.6527	27.4073	27.4785	27.6798	27.8974	27.9146	NaN	27.7453
	0.914484	-0.173747	O00299	Chloride intracellular channel protein 1	CLIC1	18	18	84.2	26.922	245.58	32.463	32.5366	32.3115	32.2869	32.3515	32.1513	33.3303	33.3568	33.4702	33.7353	33.4702	33.5296
	0.282443	-0.173698	P47712	Cytosolic phospholipase A2;Phospholipase A2;Lysophospholipase	PLA2G4A	18	18	32.7	85.238	58.153	30.0609	29.6337	30.0864	30.0084	29.3599	29.8916	30.0479	30.1842	30.2869	30.0864	29.9259	29.8959
	0.971056	-0.173164	Q13951	Core-binding factor subunit beta	CBFB	5	5	28	21.508	44.491	28.1747	28.1747	28.1065	28.0813	27.8203	28.0349	27.5898	27.7958	28.1015	26.9977	NaN	27.5969
	1.13906	-0.172815	Q9Y314	Nitric oxide synthase-interacting protein	NOSIP	5	5	35.2	33.172	14.233	27.3662	27.2445	27.2353	27.2077	27.1115	27.0084	NaN	NaN	NaN	NaN	NaN	26.9316
	0.486698	-0.17211	Q9UQB8	Brain-specific angiogenesis inhibitor 1-associated protein 2	BAIAP2	4	4	9.2	60.867	10.929	26.5075	26.5725	26.6865	26.3729	26.1908	26.6865	NaN	26.3877	25.6237	26.1946	NaN	NaN
	0.703473	-0.171632	Q13155	Aminoacyl tRNA synthase complex-interacting multifunctional protein 2	AIMP2	7	7	39.4	35.348	98.45	30.0609	30.2193	30.2077	30.1361	30.0349	29.8019	30.099	30.0349	30.2308	29.3044	30.1115	29.6578
	0.531725	-0.171433	Q92922	SWI/SNF complex subunit SMARCC1	SMARCC1	17	10	21.6	122.87	83.405	29.0375	29.0164	28.7129	28.8682	28.5609	28.8234	26.6998	NaN	NaN	NaN	26.6458	26.6181
	1.54262	-0.17023	P62888	60S ribosomal protein L30	RPL30	6	6	51.3	12.784	91.066	32.6586	32.5085	32.6329	32.3879	32.4483	32.4532	32.665	32.2731	32.4184	32.225	32.4159	32.5956
	0.38503	-0.170104	O60869	Endothelial differentiation-related factor 1	EDF1	3	3	25.7	16.368	19.153	28.6005	28.1065	28.1747	28.3109	27.9539	28.1065	28.4823	28.7325	28.5718	NaN	29.1795	NaN
	1.6044	-0.169835	Q9Y4E8	Ubiquitin carboxyl-terminal hydrolase 15	USP15	28	26	35.7	112.42	63.728	28.8711	28.9484	28.8741	28.6697	28.7064	28.8081	28.9841	29.1937	28.9428	28.8887	28.726	29.027
	0.301202	-0.169746	P05026	Sodium/potassium-transporting ATPase subunit beta-1	ATP1B1	11	11	42.9	35.061	27.133	30.5014	30.9609	31.0084	30.3303	30.7927	30.8385	30.1115	30.1604	30.0217	30.3088	30.1115	29.8974
	0.718494	-0.16971	Q13283	Ras GTPase-activating protein-binding protein 1	G3BP1	17	16	56.2	52.164	218.26	32.1634	31.9848	31.9224	32.0117	31.8004	31.7494	31.2814	31.2422	31.362	30.846	30.7453	31.2077
	0.505203	-0.169615	P31153	S-adenosylmethionine synthase isoform type-2	MAT2A	13	13	40.8	43.66	22.328	30.7927	30.6458	30.6022	30.7613	30.2979	30.4727	30.393	30.4433	30.4433	29.9814	30.2647	30.0737
	0.52321	-0.169415	Q9NT62	Ubiquitin-like-conjugating enzyme ATG3	ATG3	7	7	29.6	35.864	11.984	27.4862	27.7453	27.5969	27.5682	27.5536	27.1984	27.2262	27.1507	27.3828	26.5595	26.7517	26.8858
	0.794256	-0.169167	P49137	MAP kinase-activated protein kinase 2	MAPKAPK2	7	7	25.5	45.567	19.571	27.9484	28.0505	27.9814	28.003	27.6865	27.7833	28.2759	28.2979	28.003	NaN	27.8741	28.1263
	0.416281	-0.168757	O94992	Protein HEXIM1	HEXIM1	4	4	25.6	40.623	17.251	27.5165	27.2803	27.8324	27.2891	27.5014	27.3324	26.965	NaN	27.1984	NaN	NaN	NaN
	0.778447	-0.16772	Q86U90	YrdC domain-containing protein, mitochondrial	YRDC	5	5	32.6	29.328	23.989	27.7517	27.4785	27.5682	27.4862	27.4938	27.3153	27.604	27.5315	27.5165	NaN	27.0711	27.3745
	0.412199	-0.167484	Q9Y3P9	Rab GTPase-activating protein 1	RABGAP1	10	9	13.3	121.74	36.279	27.1312	27.6251	27.4234	27.1604	27.4154	27.1015	28.2714	28.1312	28.2759	27.673	28.0401	27.6181
	0.212338	-0.167395	Q13526	Peptidyl-prolyl cis-trans isomerase NIMA-interacting 1	PIN1	7	7	63.8	18.243	164.66	28.4073	28.5573	28.7227	28.5203	27.8385	28.8264	30.2193	30.0737	30.1724	30.1724	30.1115	30.0084
	0.668146	-0.166102	Q9NPJ6	Mediator of RNA polymerase II transcription subunit 4	MED4	3	3	18.1	29.745	8.3537	25.8552	25.8552	25.9825	25.5255	25.8044	25.8647	NaN	25.7771	26.0401	25.3712	26.3612	26.1174
	0.314175	-0.166094	Q9NY27	Serine/threonine-protein phosphatase 4 regulatory subunit 2	PPP4R2	8	8	30	46.898	32.292	27.1984	27.5165	27.5826	26.965	27.2445	27.5898	NaN	NaN	27.019	NaN	NaN	NaN
	0.55184	-0.165974	O43491	Band 4.1-like protein 2	EPB41L2	37	35	53	112.59	303.77	31.8497	32.0017	31.7888	31.6198	31.947	31.5754	31.2591	31.1177	31.4919	31.3724	31.0927	31.3463
	0.682472	-0.164653	Q9NX55	Huntingtin-interacting protein K	HYPK	4	4	43.4	14.665	72.234	29.0084	29.1842	29.2736	29.1435	28.8945	28.9344	28.9677	29.109	29.1483	NaN	28.8711	28.7895
	0.227943	-0.164588	Q14847	LIM and SH3 domain protein 1	LASP1	11	11	41.4	29.717	87.307	30.1483	30.7771	30.6285	29.9539	30.6629	30.4433	30.1724	29.4134	30.5296	29.1724	29.2422	29.5826
	0.374538	-0.164245	P35613	Basigin	BSG	6	6	28.6	42.2	70.396	30.0737	29.9539	29.7047	29.94	29.8445	29.4551	30.0084	30.2077	29.8065	30.8157	30.4032	29.995
	0.970225	-0.163897	P60228	Eukaryotic translation initiation factor 3 subunit E	EIF3E	21	21	55.1	52.22	190.25	31.4433	31.3879	31.2591	31.3142	31.1422	31.1422	31.325	31.2814	31.08	31.3672	31.08	30.8829
	0.195573	-0.163867	Q15404	Ras suppressor protein 1	RSU1	5	5	22.7	31.54	9.0033	27.7325	28.1065	28.3992	27.4234	28.0296	28.2935	27.6251	27.7325	27.726	27.3494	27.6931	27.8682
	1.60656	-0.163715	Q99471	Prefoldin subunit 5	PFDN5	8	8	61.7	17.328	28.206	29.7486	29.7973	29.7096	29.6578	29.5844	29.5222	29.2077	29.2216	29.019	28.7292	28.9316	29.0839
	0.910296	-0.163596	Q6P158	Putative ATP-dependent RNA helicase DHX57	DHX57	7	7	7	155.6	72.143	25.6375	25.4425	25.5926	25.3778	25.5045	25.2996	NaN	NaN	NaN	NaN	NaN	NaN
	1.13606	-0.163279	O75934	Pre-mRNA-splicing factor SPF27	BCAS2	9	9	59.1	26.131	85.868	29.1065	29.0839	29.1842	29.0111	28.8415	29.0322	28.6005	28.6285	28.5933	28.726	28.9787	28.6492
	0.277996	-0.162319	Q9BRR6	ADP-dependent glucokinase	ADPGK	10	10	34	54.088	99.822	28.8294	28.976	29.4234	28.6285	28.965	29.1483	26.5345	27.0711	26.3612	25.9955	26.7771	27.4234
	0.656115	-0.161967	Q9NPI6	mRNA-decapping enzyme 1A	DCP1A	5	5	13.7	63.278	11.149	25.6209	25.9203	25.8974	25.5926	25.5955	25.7645	25.3975	25.7234	25.5609	NaN	NaN	25.7695
	0.596857	-0.16185	Q9UMR2	ATP-dependent RNA helicase DDX19B	DDX19B	18	3	44.7	53.926	47.055	27.7708	27.5014	27.5165	27.391	27.5969	27.3153	27.4314	NaN	NaN	NaN	NaN	NaN
	0.139268	-0.161181	Q9P246	Stromal interaction molecule 2	STIM2	15	14	34	83.97	243.46	28.4234	27.4551	27.7129	28.3239	27.2979	27.4862	30.0349	30.1361	30.362	29.099	29.2216	29.8974
	0.217604	-0.160921	Q9H6E4	Coiled-coil domain-containing protein 134	CCDC134	4	4	22.3	26.56	9.5501	26.0317	26.2225	25.6971	25.3413	26.1253	26.002	NaN	NaN	NaN	NaN	NaN	NaN
	0.0760765	-0.160807	P23497	Nuclear autoantigen Sp-100	SP100	6	5	12.5	100.42	13.91	25.965	25.6237	25.6458	26.4738	26.1527	24.1255	26.6458	26.7645	27.0296	27.1115	27.2979	27.019
	0.441757	-0.159803	Q8NE71	ATP-binding cassette sub-family F member 1	ABCF1	17	17	27.2	95.925	150.66	29.5259	29.1361	29.1507	29.21	29.189	28.9344	29.6595	29.7549	29.8504	30.0864	29.604	29.6663
	0.531299	-0.159692	Q969Q0;P83881	60S ribosomal protein L36a-like;60S ribosomal protein L36a	RPL36AL;RPL36A	3	3	28.3	12.469	5.3191	29.114	28.8653	28.8682	28.9456	28.8294	28.5933	28.4194	28.7988	28.5682	28.509	28.8355	28.8445
	0.209819	-0.159632	Q9BZQ8	Protein Niban	FAM129A	23	23	30.1	103.13	153.69	30.6544	31.0349	31.3088	30.393	31.0084	31.1177	29.104	29.1386	28.9174	28.3745	28.6005	28.0505
	0.295054	-0.159428	O00161	Synaptosomal-associated protein 23	SNAP23	5	5	37.9	23.354	20.193	28.066	28.6146	28.4113	27.9539	28.4707	28.189	28.2123	27.8799	28.1115	28.1361	27.4394	27.673
	0.573962	-0.159367	P25685	DnaJ homolog subfamily B member 1	DNAJB1	10	9	30.6	38.044	23.332	29.7014	29.6075	29.5033	29.6561	29.2891	29.389	29.1676	29.0609	29.0453	29.49	28.9923	29.0057
	0.546398	-0.15928	Q9UL46	Proteasome activator complex subunit 2	PSME2	9	9	57.3	27.401	85.979	30.1361	29.8901	29.7244	29.7911	29.8188	29.6629	30.9882	31.1052	30.5844	31.0609	30.9609	30.6372
	0.159457	-0.158975	P40123	Adenylyl cyclase-associated protein 2	CAP2	9	8	31.2	52.823	19.423	28.0296	28.4433	28.2935	27.4938	28.7195	28.0762	NaN	27.1214	NaN	NaN	26.8858	27.6663
	0.601602	-0.15889	O15121	Sphingolipid delta(4)-desaturase DES1	DEGS1	3	3	15.8	37.866	10.458	27.2714	27.2891	27.341	26.9088	27.2535	27.2625	27.0084	27.3066	27.17	27.3494	27.3662	27.17
	0.228838	-0.158719	Q16527	Cysteine and glycine-rich protein 2	CSRP2	8	8	51.3	20.954	140.68	29.6747	30.1842	30.0864	29.393	30.1361	29.94	NaN	NaN	NaN	NaN	NaN	NaN
	0.200977	-0.158433	P14635	G2/mitotic-specific cyclin-B1	CCNB1	7	7	29.8	48.337	35.767	28.6865	28.4433	28.0084	28.5754	28.2979	27.7895	27.3578	27.2979	27.8916	NaN	NaN	NaN
	0.485095	-0.15833	Q9UPN7	Serine/threonine-protein phosphatase 6 regulatory subunit 1	PPP6R1	7	7	18.7	96.723	63.614	26.9428	27.0914	27.1214	27.019	27.0296	26.632	27.0609	NaN	27.2077	NaN	NaN	NaN
	0.939462	-0.157946	P23458	Tyrosine-protein kinase JAK1	JAK1	9	9	9.4	133.28	11.103	27.0609	27.17	27.0505	27.0296	26.976	26.8019	26.5754	26.7645	NaN	27.632	NaN	26.4394
	0.486801	-0.157701	Q8TCG1	Protein CIP2A	KIAA1524	4	4	5.7	102.18	5.8244	25.9977	25.9339	26.3256	25.9316	26.0505	25.8019	NaN	NaN	NaN	NaN	NaN	NaN
	0.477046	-0.157152	Q06787	Fragile X mental retardation protein 1	FMR1	9	7	19	71.174	23.23	27.6663	27.2077	27.4234	27.217	27.3828	27.2262	NaN	NaN	NaN	NaN	NaN	26.9088
	0.795996	-0.156982	P56537	Eukaryotic translation initiation factor 6	EIF6	7	7	56.7	26.599	275.77	31.9746	31.9916	31.781	31.8081	31.8309	31.6372	31.3828	31.362	31.3033	31.7252	31.4284	31.3356
	1.32575	-0.156328	Q9H0S4	Probable ATP-dependent RNA helicase DDX47	DDX47	7	7	23.5	50.646	182.01	27.632	27.611	27.4862	27.4473	27.3578	27.4551	27.217	27.6458	27.3745	27.8504	27.4314	27.1795
	0.273712	-0.156102	Q8IVL5	Prolyl 3-hydroxylase 2	LEPREL1	16	15	32.3	80.984	61.545	29.2781	29.5736	29.267	28.8294	29.5296	29.2913	NaN	NaN	NaN	NaN	NaN	26.4738
	1.05613	-0.156083	Q13188	Serine/threonine-protein kinase 3;Serine/threonine-protein kinase 3 36kDa subunit;Serine/threonine-protein kinase 3 20kDa subunit	STK3	15	11	45.4	56.3	33.676	28.5898	28.8142	28.6798	28.5165	28.5862	28.5128	28.5754	28.4976	28.3109	27.673	28.4473	27.8623
	1.01942	-0.15591	P17844	Probable ATP-dependent RNA helicase DDX5	DDX5	37	29	59	69.147	289.09	34.0017	33.9153	34.0512	33.9417	33.7353	33.8234	33.6307	33.6198	33.5978	33.4083	33.1649	33.2759
	1.10822	-0.155872	Q96EE3	Nucleoporin SEH1	SEH1L	8	8	37.2	39.648	123.76	29.141	29.0634	29.1115	29.0375	28.8294	28.9814	28.5898	28.5536	28.7162	29.1459	28.7325	28.7645
	0.363763	-0.155502	Q02790	Peptidyl-prolyl cis-trans isomerase FKBP4;Peptidyl-prolyl cis-trans isomerase FKBP4, N-terminally processed	FKBP4	23	23	61.2	51.804	207.02	32.525	32.5366	32.245	32.5664	32.2193	32.0544	32.3169	32.375	32.362	32.3672	32.2647	32.1513
	1.57788	-0.155312	Q01085	Nucleolysin TIAR	TIAL1	9	6	35.2	41.59	64.337	28.4354	28.509	28.49	28.3704	28.2445	28.3536	28.5278	28.5969	28.5754	28.4551	28.6251	28.5128
	0.385185	-0.153934	Q86UP3	Zinc finger homeobox protein 4	ZFHX4	13	13	6.1	393.73	18.241	26.673	26.6458	26.8974	26.3562	26.5359	26.8623	NaN	NaN	26.4441	NaN	NaN	NaN
	0.760297	-0.153728	P62263	40S ribosomal protein S14	RPS14	8	8	67.5	16.273	128.31	32.4384	32.1634	32.2814	32.0447	32.1872	32.1901	31.7494	32.2507	32.245	32.635	32.6372	32.4967
	0.161133	-0.153596	P50914	60S ribosomal protein L14	RPL14	4	4	20.9	23.432	24.839	31.781	30.6198	31.5481	31.099	31.13	31.2591	30.995	31.4032	31.4083	31.7088	31.7888	31.9539
	0.13518	-0.153591	Q9P0K7	Ankycorbin	RAI14	15	15	22.2	110.04	64.141	27.6595	28.5933	28.2077	27.524	28.6075	27.8682	NaN	NaN	NaN	NaN	26.6865	NaN
	0.308745	-0.153157	O95684	FGFR1 oncogene partner	FGFR1OP	8	8	34.1	43.064	138.22	29.1361	29.104	28.7031	28.8974	29.0401	28.5463	NaN	NaN	28.0864	NaN	NaN	NaN
	0.673189	-0.152475	Q9BW27	Nuclear pore complex protein Nup85	NUP85	11	11	25.5	75.019	23.574	27.9259	27.604	27.6527	27.6181	27.5682	27.5389	27.5463	27.611	27.509	NaN	27.632	27.5609
	0.546372	-0.151609	Q9H4M9	EH domain-containing protein 1	EHD1	25	17	62.5	60.626	93.751	30.4919	30.8081	30.6544	30.4032	30.4334	30.6629	30.0864	30.1361	30.0217	30.2077	30.2077	30.0349
	0.624722	-0.15133	O60493	Sorting nexin-3	SNX3	11	9	71	18.762	59.725	29.8858	30.1361	30.0084	29.6964	29.9259	29.9539	27.6389	28.3452	28.2625	NaN	28.0349	28.1015
	0.950388	-0.151236	Q14152	Eukaryotic translation initiation factor 3 subunit A	EIF3A	44	44	34.1	166.57	323.31	32.5527	32.5132	32.4359	32.4654	32.3463	32.2365	32.393	32.3828	32.4083	32.2814	32.1331	32.0316
	1.25584	-0.151183	Q16543	Hsp90 co-chaperone Cdc37;Hsp90 co-chaperone Cdc37, N-terminally processed	CDC37	13	13	35.7	44.468	90.317	30.1239	30.196	30.0609	30.0349	29.995	29.8974	30.6881	30.7927	30.8234	30.9188	30.5844	30.7129
	0.858507	-0.151051	P61006	Ras-related protein Rab-8A	RAB8A	8	5	39.1	23.668	33.073	28.8324	28.976	28.8142	28.8385	28.6181	28.7129	28.805	28.9231	29.099	28.8887	28.7421	28.9567
	0.115459	-0.150764	Q9Y6M7	Sodium bicarbonate cotransporter 3	SLC4A7	3	3	3.8	136.04	8.9652	26.4769	25.3578	25.5869	26.1075	25.8471	25.0148	26.4661	26.673	26.2021	NaN	NaN	25.9869
	0.53981	-0.150747	Q9GZZ1	N-alpha-acetyltransferase 50	NAA50	11	11	58	19.398	27.587	29.5444	29.2512	29.5969	29.4314	29.2331	29.2759	28.9977	28.965	28.6005	28.906	28.7453	28.6931
	0.432936	-0.150611	Q8N6R0	Methyltransferase-like protein 13	METTL13	10	10	22.7	78.767	16.883	26.1055	26.3066	26.3494	25.8997	26.0691	26.341	25.9628	NaN	NaN	NaN	NaN	NaN
	0.642067	-0.149859	P40763	Signal transducer and activator of transcription 3	STAT3	15	15	33.1	88.067	91.986	28.9456	28.8173	28.6075	28.5682	28.6931	28.6595	29.0057	28.9732	29.0003	28.9539	28.7357	28.7389
	0.416932	-0.149459	Q96GM5	SWI/SNF-related matrix-associated actin-dependent regulator of chromatin subfamily D member 1	SMARCD1	6	5	15.7	58.232	24.506	26.6998	26.6458	26.3118	26.239	26.4105	26.5595	NaN	NaN	NaN	NaN	NaN	NaN
	0.137715	-0.149145	Q9NVX2	Notchless protein homolog 1	NLE1	4	4	15.3	53.32	20.146	25.6784	25.2821	25.0233	25.7619	24.546	25.2284	25.4614	NaN	NaN	NaN	NaN	NaN
	0.199426	-0.149019	Q08357	Sodium-dependent phosphate transporter 2	SLC20A2	3	3	8	70.392	22.37	27.0401	27.524	27.3153	26.6595	27.5014	27.2714	NaN	NaN	26.9088	NaN	NaN	NaN
	0.376421	-0.14893	P46783;Q9NQ39	40S ribosomal protein S10;Putative 40S ribosomal protein S10-like	RPS10;RPS10P5	8	8	43	18.898	34.401	31.4823	31.2869	31.1842	31.3463	30.8901	31.2703	30.6458	30.5203	31.2135	30.2979	30.4629	30.9045
	1.14259	-0.148885	Q14807	Kinesin-like protein KIF22	KIF22	11	11	25.4	73.261	15.655	28.3367	28.2891	28.2803	28.267	28.0711	28.1214	27.3066	27.1984	27.7645	NaN	NaN	NaN
	0.722484	-0.148609	Q9C004	Protein sprouty homolog 4	SPRY4	8	8	36.5	32.541	79.91	30.2759	30.5933	30.4919	30.3088	30.3196	30.2869	30.1115	29.995	30.0217	28.1361	NaN	29.158
	0.25448	-0.148602	P49207	60S ribosomal protein L34	RPL34	5	5	29.1	13.293	5.006	29.8726	29.6697	29.3971	29.4668	29.8355	29.1913	29.7895	29.8974	29.9539	30.4032	NaN	28.6492
	0.800707	-0.148452	O95373	Importin-7	IPO7	30	29	35.3	119.52	168.06	31.947	31.8234	31.7088	31.7771	31.6066	31.6501	32.362	32.3802	32.3356	32.4751	32.1634	32.005
	0.548182	-0.148315	Q9Y3D0	Mitotic spindle-associated MMXD complex subunit MIP18	FAM96B	6	6	76.1	17.663	55.072	28.4433	28.4433	28.362	28.4746	28.258	28.0711	28.5389	28.673	28.7864	29.2054	28.9539	28.4938
	0.258448	-0.147799	P20839	Inosine-5-monophosphate dehydrogenase 1	IMPDH1	14	14	37.5	55.405	55.864	29.6181	29.3578	29.141	29.5573	29.1819	28.9344	29.9539	29.8489	29.747	30.2308	29.7927	29.6268
	0.371131	-0.147249	Q9NUU7	ATP-dependent RNA helicase DDX19A	DDX19A	20	5	52.3	53.974	212.54	30.8682	30.7211	30.5481	30.8081	30.5573	30.3303	30.7453	30.6458	30.7927	30.5203	30.3088	30.4532
	0.360844	-0.147013	Q9HAV4	Exportin-5	XPO5	21	21	23.8	136.31	54.634	28.5052	28.2077	28.391	28.4234	27.9372	28.3023	29.019	28.9316	28.7833	29.1937	28.9203	28.7227
	0.194862	-0.14679	P63096	Guanine nucleotide-binding protein G(i) subunit alpha-1	GNAI1	11	3	42.7	40.361	34.138	27.5969	27.9539	27.0609	27.1984	27.632	27.341	27.5536	27.6798	27.5826	27.509	27.6458	27.8623
	0.166536	-0.145986	Q9Y371	Endophilin-B1	SH3GLB1	8	8	29.3	40.796	38.734	27.1507	27.9539	28.0453	27.2445	27.6595	27.8081	27.2979	27.141	27.2445	NaN	NaN	27.3662
	0.373592	-0.145679	P19623	Spermidine synthase	SRM	14	14	65.6	33.824	82.918	29.8127	29.604	29.55	29.7692	29.4823	29.2781	28.9539	28.5573	28.8858	28.7676	28.9539	28.9814
	0.283749	-0.144899	Q9H0B6	Kinesin light chain 2	KLC2	11	4	24.8	68.934	10.217	26.3926	26.2909	25.8858	26.1194	26.2335	25.7816	26.067	26.0588	NaN	26.5135	NaN	25.8764
	1.2611	-0.144254	P05387	60S acidic ribosomal protein P2	RPLP2	9	8	88.7	11.665	230.87	33.87	33.9763	33.8883	33.6839	33.8234	33.7946	33.8883	33.9763	33.8883	34.4943	33.9591	33.8516
	1.27648	-0.144138	P26641	Elongation factor 1-gamma	EEF1G	25	25	68.6	50.118	275.77	34.5238	34.4763	34.4581	34.4396	34.2828	34.3033	34.4823	34.4083	34.4519	34.1604	34.2048	34.3633
	0.249312	-0.144116	Q14694	Ubiquitin carboxyl-terminal hydrolase 10	USP10	18	18	36.6	87.133	205.08	30.1483	29.8489	29.5754	29.995	29.6981	29.4473	29.7129	29.726	29.7927	29.579	29.3388	29.3001
	0.666052	-0.143869	P61758	Prefoldin subunit 3	VBP1	7	7	37.6	22.658	54.83	29.2262	29.1361	29.1604	29.2123	28.8974	28.9814	28.7421	28.805	28.6424	28.0762	28.4314	28.3494
	0.273438	-0.143454	Q9UN37	Vacuolar protein sorting-associated protein 4A	VPS4A	12	9	30.2	48.897	19.822	29.588	29.1984	29.0453	29.4012	29.0296	28.9705	29.1507	29.0164	29.326	28.362	NaN	28.6424
	0.859409	-0.142427	Q9Y3A3	MOB-like protein phocein	MOB4	5	5	34.7	26.032	21.591	27.8385	27.7833	27.9923	27.6389	27.7771	27.7708	27.9316	28.0813	28.17	NaN	27.4154	28.0711
	0.918146	-0.141959	P12268	Inosine-5-monophosphate dehydrogenase 2	IMPDH2	21	21	47.7	55.804	135.67	31.9365	31.8829	31.7453	31.7613	31.7533	31.6242	31.3879	31.2924	31.1177	31.2422	30.9814	30.8608
	0.150337	-0.141939	P28161	Glutathione S-transferase Mu 2	GSTM2	6	4	34.4	25.744	8.3689	27.9814	28.3494	28.673	27.6595	28.2625	28.6561	NaN	NaN	NaN	27.7517	27.7895	27.5165
	0.406558	-0.141666	Q96K37	Solute carrier family 35 member E1	SLC35E1	5	5	21	44.772	22.942	26.673	26.8264	26.4815	26.3562	26.4738	26.726	26.5345	NaN	27.0813	NaN	26.5285	26.9203
	0.398636	-0.141308	P48634	Protein PRRC2A	PRRC2A	12	12	10.9	228.86	32.41	28.2891	28.0864	28.17	28.3066	27.8445	27.9705	27.5682	28.2535	28.0401	NaN	NaN	NaN
	0.341896	-0.140924	Q9Y4W6	AFG3-like protein 2	AFG3L2	11	10	19.2	88.583	59.583	27.4707	27.0296	27.5165	27.3153	27.0711	27.2077	27.3992	27.7064	27.217	27.9372	27.9814	27.632
	0.735819	-0.140844	Q00341	Vigilin	HDLBP	43	43	45.4	141.45	223.63	31.6022	31.7652	31.7252	31.4134	31.6501	31.6066	32.0895	31.995	32.1544	32.0673	31.5062	31.8608
	0.28475	-0.14023	Q8N4X5	Actin filament-associated protein 1-like 2	AFAP1L2	11	11	28.7	91.299	43.49	27.8974	28.217	28.1652	27.7389	28.2935	27.8264	NaN	NaN	NaN	NaN	NaN	NaN
	0.620243	-0.140139	O95816	BAG family molecular chaperone regulator 2	BAG2	8	8	61.1	23.772	265.21	29.8415	30.0737	29.9117	29.6831	29.94	29.7833	30.1724	30.2422	30.4532	30.4433	30.1604	30.2308
	0.396011	-0.139992	Q9NRY4	Rho GTPase-activating protein 35	ARHGAP35	30	30	28.8	170.51	129.15	30.099	30.4134	30.4134	29.9677	30.2077	30.3303	30.3515	30.3724	30.2869	30.2759	30.1115	30.1115
	0.107114	-0.139313	O14497	AT-rich interactive domain-containing protein 1A	ARID1A	16	14	14.6	242.04	97.345	28.5536	27.726	27.341	28.2123	27.17	27.8203	27.217	26.574	27.2979	26.965	26.9203	26.433
	0.545653	-0.139205	Q14247	Src substrate cortactin	CTTN	22	22	42.5	61.585	323.31	31.7252	31.8571	31.6329	31.4823	31.781	31.5343	31.4384	31.3515	31.611	30.4234	30.94	31.3303
	0.364248	-0.139092	Q92879	CUGBP Elav-like family member 1	CELF1	7	7	19.5	52.063	14.102	27.604	27.6595	27.5898	27.7833	27.3992	27.2535	27.5389	27.4234	27.509	27.9484	27.632	27.3153
	0.5847	-0.138623	Q86W50	Methyltransferase-like protein 16	METTL16	10	10	29.5	63.62	48.6	27.0084	27.1214	27.3153	27.1214	26.965	26.9428	26.9088	26.7517	27.2353	NaN	26.965	27.5536
	0.790744	-0.13857	Q9UKV8	Protein argonaute-2	AGO2	24	19	43.1	97.207	107.28	29.4746	29.6544	29.5591	29.5052	29.3023	29.4649	29.7195	29.7708	29.9117	29.632	29.7802	29.837
	0.140966	-0.138533	O95081	Arf-GAP domain and FG repeat-containing protein 2	AGFG2	5	5	22.7	48.962	37.853	28.1556	27.5609	27.9705	28.3023	27.7708	27.1984	28.5933	28.604	28.6798	28.0813	28.2979	28.391
	0.333256	-0.138477	Q86WB0	Nuclear-interacting partner of ALK	ZC3HC1	10	10	34.1	55.261	18.633	27.9372	28.1795	28.5014	28.17	28.0243	28.0084	28.2308	27.7064	28.1015	NaN	27.4707	28.1556
	1.11306	-0.138229	P55209	Nucleosome assembly protein 1-like 1	NAP1L1	16	14	56	45.374	304.48	33.3169	33.1872	33.2193	33.0927	33.1828	33.0332	33.1813	33.2759	33.2033	32.8309	32.8719	32.9063
	0.485872	-0.137754	Q12800	Alpha-globin transcription factor CP2	TFCP2	7	5	24.7	57.255	94.252	27.9088	27.7517	28.1556	27.8385	27.8385	27.726	28.0243	27.8203	28.0505	27.6663	NaN	27.9259
	0.227386	-0.137461	Q96HP0	Dedicator of cytokinesis protein 6	DOCK6	38	36	29.4	229.56	80.21	29.1263	28.5426	28.673	28.9428	28.4113	28.5754	29.995	29.726	29.8697	29.6646	29.4012	29.1866
	0.384523	-0.137346	Q15269	Periodic tryptophan protein 2 homolog	PWP2	10	10	18.2	102.45	31.439	27.8799	27.673	28.1747	27.8445	27.7195	27.7517	27.3153	27.4551	27.6527	27.611	27.6998	27.6931
	0.471252	-0.137123	O00566	U3 small nucleolar ribonucleoprotein protein MPP10	MPHOSPH10	5	5	15.3	78.863	105.54	28.0813	28.1652	28.003	28.1795	27.8142	27.8445	27.7958	27.604	28.1842	NaN	27.2262	27.6389
	0.534743	-0.137078	Q9Y6K9	NF-kappa-B essential modulator	IKBKG	6	6	17.9	48.197	59.4	28.3704	28.4512	28.249	28.0453	28.3787	28.2353	28.8264	28.9088	28.8474	29.0914	28.4862	28.5754
	0.539748	-0.136258	Q13310	Polyadenylate-binding protein 4	PABPC4	23	14	44.3	70.782	229.89	31.4678	31.5296	31.3303	31.4134	31.3879	31.1177	30.9746	30.9677	30.995	30.5573	30.7047	30.7849
	0.352792	-0.13582	Q8IYB8	ATP-dependent RNA helicase SUPV3L1, mitochondrial	SUPV3L1	10	10	18.3	87.99	17.548	27.9031	27.7195	27.7064	27.8203	27.3494	27.7517	27.2979	27.7517	27.3494	28.0505	27.8142	28.0349
	1.41429	-0.135178	O14745	Na(+)/H(+) exchange regulatory cofactor NHE-RF1	SLC9A3R1	10	10	37.7	38.868	85.902	29.6697	29.7958	29.7047	29.5407	29.6163	29.6075	NaN	NaN	27.7517	NaN	NaN	NaN
	1.16942	-0.134965	Q14CX7	N-alpha-acetyltransferase 25, NatB auxiliary subunit	NAA25	15	15	20.7	112.29	25.301	27.9031	27.976	28.0762	27.8504	27.8142	27.8858	28.0453	27.8385	27.726	27.3239	27.6931	27.5165
	2.53676	-0.134841	P42285	Superkiller viralicidic activity 2-like 2	SKIV2L2	19	19	26.2	117.8	43.991	29.8415	29.7833	29.8019	29.6527	29.6931	29.6764	29.5014	29.6646	29.5184	29.8188	29.5627	29.49
	0.247992	-0.134645	Q15046	Lysine--tRNA ligase	KARS	24	24	47.9	68.047	230.54	32.4532	32.1574	31.933	32.3303	32.005	31.8042	32.0184	32.1177	32.0479	32.3436	31.9259	31.94
	0.825924	-0.134474	Q9BSJ8	Extended synaptotagmin-1	ESYT1	31	31	44.1	122.85	323.31	31.7771	31.7573	31.8829	31.5573	31.6756	31.781	31.7252	31.9117	32.025	31.9259	31.8385	31.8196
	0.135508	-0.134224	Q93052	Lipoma-preferred partner	LPP	9	9	24.3	65.746	33.9	26.9869	27.3578	27.632	26.5638	27.524	27.4862	27.6931	27.3992	28.0349	NaN	NaN	28.0349
	0.144579	-0.134012	Q6PL18	ATPase family AAA domain-containing protein 2	ATAD2	20	17	21.9	158.55	37.881	29.2147	29.4785	29.8519	28.9117	29.3196	29.9117	28.2625	28.0084	28.9814	NaN	26.2133	27.17
	0.317134	-0.133953	Q13033	Striatin-3	STRN3	9	8	14.8	87.208	15.002	27.4862	27.604	27.7833	27.2891	27.3992	27.7833	27.7771	27.7453	27.4938	NaN	26.965	27.5389
	0.799947	-0.133554	O60518	Ran-binding protein 6	RANBP6	11	9	16.7	124.71	16.584	26.9316	27.189	27.0401	26.8858	26.9203	26.9539	NaN	NaN	NaN	NaN	25.9473	NaN
	0.200033	-0.133515	O43818	U3 small nucleolar RNA-interacting protein 2	RRP9	4	4	13.7	51.84	245.9	27.1214	26.3109	26.8858	26.8142	26.5898	26.5135	NaN	NaN	NaN	NaN	27.4938	26.8741
	0.109854	-0.133334	O75051	Plexin-A2	PLXNA2	26	22	20.5	211.1	93.845	28.2262	29.3869	29.2123	28.3239	29.1532	28.9484	NaN	26.8019	27.6865	NaN	NaN	27.5754
	0.693618	-0.133298	Q9UHV9	Prefoldin subunit 2	PFDN2	6	6	56.5	16.648	50.493	30.2308	30.2308	30.0479	30.0864	30.1115	29.9117	29.7227	29.7309	29.8489	29.8959	29.326	29.6005
	0.130533	-0.133212	Q9NWQ8	Phosphoprotein associated with glycosphingolipid-enriched microdomains 1	PAG1	10	10	47.9	46.98	100.79	27.6865	28.509	28.4629	27.5609	28.3109	28.3869	27.5969	NaN	28.258	NaN	27.3662	28.066
	0.346697	-0.133044	Q15599	Na(+)/H(+) exchange regulatory cofactor NHE-RF2	SLC9A3R2	9	9	44.5	37.413	23.779	27.5682	27.7708	28.0711	27.5463	27.7129	27.7517	27.7195	27.9484	27.5826	28.203	28.1604	28.019
	0.646841	-0.133018	Q5VT52	Regulation of nuclear pre-mRNA domain-containing protein 2	RPRD2	15	15	19.2	156.02	87.089	27.7833	27.6181	27.5682	27.5826	27.391	27.5969	27.6527	NaN	28.1164	NaN	27.6998	27.3828
	0.220438	-0.132983	Q96C36	Pyrroline-5-carboxylate reductase 2	PYCR2	10	9	37.8	33.637	84.044	29.8081	29.4354	29.3971	29.8035	29.2422	29.196	29.5536	29.6697	29.7818	29.94	29.94	29.9539
	0.12528	-0.132874	Q13428	Treacle protein	TCOF1	21	21	25.6	152.1	301.32	30.0737	29.1115	29.114	29.7014	29.2535	28.9456	29.158	28.5609	29.2399	29.0164	28.1507	28.8887
	0.446888	-0.132343	A5YKK6	CCR4-NOT transcription complex subunit 1	CNOT1	40	40	23.6	266.94	114.71	29.8173	29.632	29.6198	29.7517	29.3704	29.55	30.0217	30.0084	29.8218	29.8264	29.837	29.6424
	0.547218	-0.131588	Q9P0V9	Septin-10	2020-09-10	10	9	34.4	52.592	46.687	27.5826	27.9372	27.8324	27.6251	27.6798	27.6527	28.267	28.0557	28.1065	27.632	27.9203	28.217
	0.998061	-0.131073	P63173	60S ribosomal protein L38	RPL38	4	4	48.6	8.2178	7.9185	30.8309	30.6798	30.8081	30.6372	30.5754	30.7129	30.0349	30.1239	30.4032	28.6424	29.2957	30.3196
	0.847412	-0.130861	Q13492	Phosphatidylinositol-binding clathrin assembly protein	PICALM	10	8	22.4	70.754	79.61	29.2467	29.2445	29.094	29.0243	29.1652	29.003	29.003	28.9031	28.9977	NaN	28.1937	28.4113
	1.05572	-0.130441	O14976	Cyclin-G-associated kinase	GAK	14	14	17.7	143.19	40.558	27.6663	27.8203	27.6931	27.6595	27.5463	27.5826	29.0557	28.6355	28.8415	NaN	28.3951	28.7549
	0.388789	-0.1304	Q8TED1	Probable glutathione peroxidase 8	GPX8	6	6	40.7	23.881	11.026	28.2891	28.524	28.4668	28.0813	28.3023	28.5052	28.6075	28.9231	29.3217	28.6181	28.9174	29.2308
	0.433001	-0.129405	Q14671	Pumilio homolog 1	PUM1	9	8	12.5	126.47	110.58	28.0401	27.8916	27.9539	28.0349	27.8445	27.6181	27.8564	27.7958	28.2216	NaN	NaN	28.3452
	0.262924	-0.129368	Q86V81	THO complex subunit 4	ALYREF	8	8	45.5	26.888	97.388	31.1783	30.7771	31.4083	30.8682	31.099	31.0084	30.8234	30.9259	30.995	29.995	30.7849	31.196
	0.761169	-0.129108	P39023	60S ribosomal protein L3	RPL3	18	18	44.2	46.108	92.18	32.9983	32.859	33.0134	32.8829	32.8937	32.7068	32.8042	32.9063	33.0332	33.13	32.8195	33.0832
	0.221149	-0.129052	P23381	Tryptophan--tRNA ligase, cytoplasmic;T1-TrpRS;T2-TrpRS	WARS	20	20	54.1	53.165	196.98	31.6964	31.933	32.2869	31.5709	31.8719	32.0864	31.393	31.3033	31.3568	31.5062	31.0017	31.3088
	0.723131	-0.128717	O75822	Eukaryotic translation initiation factor 3 subunit J	EIF3J	12	12	28.7	29.062	36.439	29.4862	29.5555	29.5352	29.5407	29.3807	29.2692	29.1337	29.1628	29.1866	28.9372	29.1263	28.906
	0.588847	-0.128462	P62750	60S ribosomal protein L23a	RPL23A	9	9	42.3	17.695	39.513	32.1021	31.8347	32.0895	31.8901	31.8004	31.9505	31.611	31.7927	31.9435	32.3489	32.0217	31.8645
	0.220514	-0.128113	O43815	Striatin	STRN	17	16	36.3	86.131	39.486	28.8294	29.2147	28.9031	28.8682	29.1819	28.5128	28.4354	27.9705	28.189	26.8019	NaN	28.6146
	0.336484	-0.12808	P08754	Guanine nucleotide-binding protein G(k) subunit alpha	GNAI3	17	10	58.2	40.532	155.05	29.7031	30.0864	29.6848	29.5682	29.8623	29.6595	29.2376	29.3109	29.3745	29.019	29.4492	29.3239
	0.269033	-0.127556	Q8IWA0	WD repeat-containing protein 75	WDR75	14	14	28.6	94.498	64.558	29.3088	29.196	29.1507	29.4374	28.8112	29.0243	29.1214	29.0401	29.1189	28.8974	29.099	28.8081
	0.590323	-0.126921	Q96GM8	Target of EGR1 protein 1	TOE1	10	10	32	56.547	76.354	28.7064	28.5389	28.4354	28.5426	28.3828	28.3745	28.5609	28.632	28.7833	28.7833	28.7771	28.7162
	0.348531	-0.126598	Q96P47	Arf-GAP with GTPase, ANK repeat and PH domain-containing protein 3	AGAP3	7	6	15.5	95.043	107.99	28.066	27.8504	27.8741	28.0557	27.7581	27.5969	28.5352	28.6458	28.5933	28.2891	28.2979	28.391
	0.206747	-0.126188	P18206	Vinculin	VCL	59	59	59.5	123.8	323.31	34.1828	34.5867	34.6361	33.9677	34.5354	34.5238	33.8328	33.9417	34.1223	34.2265	33.8792	34.0349
	0.353625	-0.126005	P62753	40S ribosomal protein S6	RPS6	10	10	35.3	28.68	111.03	32.2619	31.846	32.2077	31.846	32.0832	32.0084	31.4083	31.7927	31.978	32.7231	32.005	32.1634
	0.450063	-0.125763	O95218	Zinc finger Ran-binding domain-containing protein 2	ZRANB2	6	6	23.3	37.404	17.953	27.9372	27.7645	27.9259	27.6798	27.611	27.9595	26.9428	27.4234	27.604	28.203	27.9316	27.6998
	0.112272	-0.125741	O00273	DNA fragmentation factor subunit alpha	DFFA	7	7	26.6	36.521	12.904	28.8916	28.6527	28.2935	29.2077	28.2445	28.0084	27.6389	27.341	27.8623	27.4314	27.604	27.6663
	0.565955	-0.125721	P23258;Q9NRH3	Tubulin gamma-1 chain;Tubulin gamma-2 chain	TUBG1;TUBG2	14	14	57.4	51.169	68.608	28.9316	28.8916	28.8324	28.8711	28.8355	28.5718	29.3239	29.3088	29.2803	29.1459	29.1937	29.2557
	0.14634	-0.125678	P27144	Adenylate kinase 4, mitochondrial	AK4	7	7	49.8	25.268	19.423	28.2353	27.7771	27.3578	28.0243	27.611	27.3578	28.0453	28.4073	28.0084	29.0711	28.4746	28.49
	0.148911	-0.125267	Q9NYY8	FAST kinase domain-containing protein 2	FASTKD2	9	9	17	81.462	19.585	26.7771	26.9203	26.2874	27.0296	26.2468	26.3324	27.7958	27.4551	27.8623	27.8385	27.9595	28.0505
	0.491963	-0.124702	P46976	Glycogenin-1	GYG1	9	9	26.3	39.383	98.796	28.4785	28.7581	28.7227	28.4032	28.55	28.632	28.141	28.2216	28.0296	NaN	27.611	27.7833
	0.315786	-0.12354	O00505	Importin subunit alpha-4	KPNA3	10	8	34	57.81	62.04	30.3088	30.196	29.94	30.2535	29.8667	29.9539	30.4032	30.6022	30.5573	30.7771	30.4823	30.341
	0.480508	-0.123466	Q9H4A6	Golgi phosphoprotein 3	GOLPH3	8	6	31.2	33.81	91.575	28.8264	29.0788	29.0609	28.7129	28.9287	28.9539	29.1628	29.1652	29.0965	29.2422	29.0479	29.1239
	0.367484	-0.123208	Q04726	Transducin-like enhancer protein 3	TLE3	6	4	12.7	83.416	12.432	26.8623	27.1015	27.2535	26.8858	26.8504	27.1115	NaN	NaN	NaN	NaN	NaN	NaN
	0.156111	-0.123155	Q14240	Eukaryotic initiation factor 4A-II;Eukaryotic initiation factor 4A-II, N-terminally processed	EIF4A2	26	14	70.5	46.402	120.15	31.5203	31.3303	30.8755	31.4234	31.2535	30.6798	30.8385	30.8682	30.9117	30.8608	30.6964	30.5014
	0.774768	-0.12267	P63241;Q6IS14	Eukaryotic translation initiation factor 5A-1;Eukaryotic translation initiation factor 5A-1-like	EIF5A;EIF5AL1	17	17	88.3	16.832	323.31	33.7849	33.6944	33.6735	33.715	33.5754	33.4943	33.8883	33.9242	33.8234	34.0592	33.9063	33.7653
	0.194243	-0.122347	Q5JPH6	Probable glutamate--tRNA ligase, mitochondrial	EARS2	8	8	21.2	58.688	17.654	26.4504	26.3477	26.8142	26.6181	26.0233	26.604	26.9428	26.5898	26.3307	27.1795	26.8019	26.6595
	0.575477	-0.12178	Q04206	Transcription factor p65	RELA	10	10	23.2	60.218	31.823	28.341	28.6595	28.5165	28.3662	28.362	28.4234	28.6697	28.6285	28.4668	28.8504	28.55	28.2625
	0.272001	-0.121691	Q5SW79	Centrosomal protein of 170 kDa	CEP170	18	18	19.6	175.29	147.51	28.7676	28.5536	28.3536	28.5536	28.5862	28.17	28.1747	28.1556	28.3153	27.8504	27.8564	27.4938
	1.0015	-0.121416	O15357	Phosphatidylinositol 3,4,5-trisphosphate 5-phosphatase 2	INPPL1	25	25	32	138.6	85.126	28.8887	29.027	28.9456	28.7517	28.8711	28.8741	29.1065	29.0609	29.1263	27.604	28.7581	28.6898
	0.985121	-0.121367	Q9BVG4	Protein PBDC1	PBDC1	8	8	36.1	26.056	111.08	29.4649	29.3578	29.4214	29.341	29.3431	29.196	29.0839	29.1115	29.109	29.0427	28.8564	28.8945
	0.304261	-0.120877	O00410	Importin-5	IPO5	44	42	60.8	123.63	323.31	32.2336	32.0084	31.8042	32.099	31.8234	31.7613	33.0816	33.1989	33.0495	33.1753	33.1407	32.9365
	0.538006	-0.120495	Q9H6Y2	WD repeat-containing protein 55	WDR55	6	6	33.7	42.07	34.148	27.3578	27.1115	27.0711	27.1312	27.0609	26.9869	NaN	NaN	26.8385	NaN	NaN	NaN
	0.178072	-0.120407	O15254	Peroxisomal acyl-coenzyme A oxidase 3	ACOX3	11	11	21.9	77.628	20.696	27.1015	26.976	27.391	26.6595	27.0084	27.4394	27.8324	27.8324	27.9372	27.4073	27.9428	27.7581
	0.236437	-0.1197	Q8TDN6	Ribosome biogenesis protein BRX1 homolog	BRIX1	11	11	51.3	41.401	50.672	30.0349	29.6251	29.7178	29.8945	29.7517	29.3724	29.249	29.6964	29.995	29.5772	29.8593	29.8726
	0.747642	-0.119613	Q9UHX1	Poly(U)-binding-splicing factor PUF60	PUF60	20	20	49.9	59.875	260.69	31.6458	31.5978	31.8119	31.6022	31.4967	31.5978	31.4284	31.341	31.4083	31.3088	31.2759	31.2193
	0.437259	-0.119574	Q05086	Ubiquitin-protein ligase E3A	UBE3A	14	14	25.1	100.69	38.829	28.4354	28.3153	28.1937	28.3828	28.1164	28.0864	27.4234	27.141	27.604	NaN	27.9595	26.8741
	0.861862	-0.119214	P35606	Coatomer subunit beta	COPB2	39	39	67.5	102.49	323.31	32.7573	32.8119	32.7333	32.5754	32.7672	32.6022	33.3303	33.2478	33.3436	32.9591	32.8865	33.0034
	0.569518	-0.119144	O95163	Elongator complex protein 1	IKBKAP	16	16	18	150.25	103.01	27.4394	27.5754	27.7453	27.4314	27.524	27.4473	27.8504	27.8203	27.8019	27.7708	27.632	27.3324
	0.296269	-0.118588	Q8NFH3	Nucleoporin Nup43	NUP43	9	9	38.4	42.15	84.22	28.1361	28.4274	28.4154	28.0762	28.0762	28.4707	27.5609	27.6663	27.604	NaN	NaN	27.6865
	0.742165	-0.118501	P62136	Serine/threonine-protein phosphatase PP1-alpha catalytic subunit	PPP1CA	21	7	71.2	37.512	185.09	32.8062	32.665	32.7712	32.7393	32.5343	32.6132	32.686	32.4799	32.6329	32.2019	32.393	32.6307
	0.576625	-0.117182	P40429;Q6NVV1	60S ribosomal protein L13a;Putative 60S ribosomal protein L13a protein RPL13AP3	RPL13A;RPL13AP3	7	7	27.1	23.577	11.709	30.1483	30.1239	30.0609	30.0084	30.1361	29.837	30.0349	30.1842	30.4629	30.9539	30.5573	30.4334
	0.230429	-0.117051	P60981	Destrin	DSTN	9	8	58.8	18.506	21.076	29.843	30.0479	30.1842	29.5646	30.1115	30.0479	30.196	30.2422	30.1361	30.2979	30.1239	30.1115
	0.202838	-0.117015	O94973	AP-2 complex subunit alpha-2	AP2A2	19	13	28.4	103.96	25.743	28.141	28.0349	28.17	28.2262	27.5609	28.2077	29.0217	29.0243	28.9372	27.9203	29.1115	29.0243
	0.296055	-0.117002	Q6UXH1	Cysteine-rich with EGF-like domain protein 2	CRELD2	6	6	16.1	38.191	136.08	28.267	28.4473	28.17	28.2891	28.341	27.9031	28.1312	28.0137	28.0813	28.0084	28.6527	28.1795
	0.781687	-0.116936	Q92623	Tetratricopeptide repeat protein 9A	TTC9	3	3	24.8	24.379	13.04	27.1984	27.3324	27.3239	27.2714	27.0914	27.141	27.4785	26.8858	27.4707	NaN	NaN	27.2353
	0.260481	-0.116749	P49585	Choline-phosphate cytidylyltransferase A	PCYT1A	7	7	28.3	41.731	26.614	27.8203	27.8858	28.0505	27.9088	27.4785	28.019	27.7833	27.9088	27.6931	NaN	27.5609	27.726
	0.843205	-0.116704	Q9H307	Pinin	PNN	7	7	13.9	81.627	34.158	29.4433	29.4012	29.5203	29.4314	29.2445	29.3388	29.0686	28.7833	29.249	29.267	28.8799	28.6898
	0.125521	-0.116599	O43670	BUB3-interacting and GLEBS motif-containing protein ZNF207	ZNF207	5	5	13.2	50.75	97.885	28.8974	28.4073	28.3536	29.0217	28.1312	28.1556	28.4629	28.2891	28.9117	28.9088	28.9567	28.9595
	0.530807	-0.116456	Q16539	Mitogen-activated protein kinase 14	MAPK14	9	9	41.4	41.293	24.159	27.8741	27.6389	27.8264	27.6251	27.7895	27.5754	28.003	28.0084	28.1115	27.9977	27.9031	27.965
	1.24487	-0.115262	P61026	Ras-related protein Rab-10	RAB10	7	5	37.5	22.541	12.896	29.747	29.6389	29.6646	29.5128	29.6093	29.5826	29.1483	29.1937	29.0453	29.5352	29.2216	29.3431
	0.392075	-0.115248	Q9Y4C8	Probable RNA-binding protein 19	RBM19	8	8	14.2	107.33	22.81	26.8142	26.7771	26.8741	26.9428	26.632	26.5448	26.7645	26.673	26.4953	26.7129	26.3926	26.726
	0.574668	-0.115164	P40692	DNA mismatch repair protein Mlh1	MLH1	5	5	11.5	84.6	13.607	26.9977	27.0505	27.17	26.8623	27.1015	26.9088	26.1273	NaN	26.604	NaN	NaN	NaN
	0.559013	-0.11492	Q8N1F7	Nuclear pore complex protein Nup93	NUP93	28	28	46.6	93.487	122.23	30.947	30.7771	30.6881	30.7771	30.6022	30.6881	30.7292	30.7373	30.8755	30.7927	30.6629	30.6629
	1.0472	-0.114836	P19525	Interferon-induced, double-stranded RNA-activated protein kinase	EIF2AK2	17	17	33.4	62.094	53.45	29.7895	29.6303	29.6612	29.6075	29.579	29.55	29.4842	29.55	29.5259	29.3683	29.249	29.4113
	0.379203	-0.114596	Q9Y5Q9	General transcription factor 3C polypeptide 3	GTF3C3	12	12	22.3	101.27	128.81	27.3239	27.2714	27.6251	27.2535	27.2077	27.4154	27.632	27.341	27.4234	27.509	27.3745	27.7708
	0.568484	-0.114344	P08708	40S ribosomal protein S17	RPS17	9	9	53.3	15.55	122.59	32.1513	31.8829	31.9365	31.8422	31.947	31.8385	31.6372	31.94	31.8119	31.9224	32.0447	32.08
	0.543917	-0.114165	Q92575	UBX domain-containing protein 4	UBXN4	4	4	14.6	56.777	125.43	28.2077	28.1115	28.3828	28.1747	28.0243	28.1604	29.3196	29.249	29.1652	29.5389	29.3431	29.1288
	0.178428	-0.113818	Q6NUQ4	Transmembrane protein 214	TMEM214	13	13	27.7	77.15	30.048	27.726	27.3745	27.9259	27.3153	27.4551	27.9146	28.3066	28.632	28.4314	27.6458	28.1984	28.6216
	1.14612	-0.11349	Q9Y679	Ancient ubiquitous protein 1	AUP1	6	6	26.8	45.786	26.935	27.6931	27.5463	27.673	27.5389	27.5165	27.5165	NaN	27.2803	27.4707	NaN	NaN	27.8264
	0.297467	-0.113256	Q27J81	Inverted formin-2	INF2	25	25	34.8	135.62	239.79	29.6128	29.877	30.0737	29.5862	29.8096	29.8279	29.6747	29.5407	29.8843	29.3346	29.2803	29.747
	0.529945	-0.113013	Q9NQC3	Reticulon-4	RTN4	10	10	20	129.93	114.43	32.5799	32.4159	32.3646	32.4083	32.4083	32.2048	32.225	31.9916	32.4108	31.9882	31.6671	31.9153
	0.615021	-0.112576	Q13131	5-AMP-activated protein kinase catalytic subunit alpha-1	PRKAA1	11	11	31.3	64.009	69.944	28.0137	27.9316	27.7645	27.7195	27.8081	27.8445	28.5754	28.2935	28.5609	27.8264	28.2445	28.4823
	0.437928	-0.112431	Q8NFH4	Nucleoporin Nup37	NUP37	6	6	25.2	36.707	27.899	27.8385	27.5609	27.6458	27.4394	27.5754	27.6931	26.9539	26.6181	NaN	NaN	NaN	27.4073
	1.11843	-0.112268	Q99613;B5ME19	Eukaryotic translation initiation factor 3 subunit C;Eukaryotic translation initiation factor 3 subunit C-like protein	EIF3C;EIF3CL	28	28	39	105.34	308.32	31.9677	31.978	31.9505	31.9435	31.8271	31.7888	31.7771	31.8042	31.7333	31.8792	31.6458	31.5573
	0.233133	-0.111966	Q86VW0	SEC14 domain and spectrin repeat-containing protein 1	SESTD1	5	5	12.5	79.347	28.721	26.1288	26.1661	26.533	25.9111	26.3844	26.1965	26.6458	26.4877	26.8264	27.1015	26.673	26.4614
	0.39341	-0.111933	Q92538	Golgi-specific brefeldin A-resistance guanine nucleotide exchange factor 1	GBF1	35	35	32.3	206.44	141.53	30.4532	30.5573	30.5481	30.196	30.4334	30.5933	30.5573	30.6544	30.4919	30.362	30.4727	30.2308
	0.258669	-0.111808	Q06265	Exosome complex component RRP45	EXOSC9	5	5	14.1	48.948	8.8427	27.9031	27.6251	27.4629	27.7453	27.3494	27.5609	27.189	27.6389	27.3992	27.5315	27.673	27.673
	0.983999	-0.111806	P55884	Eukaryotic translation initiation factor 3 subunit B	EIF3B	36	36	56.4	92.48	323.31	32.6902	32.6	32.6458	32.6198	32.5203	32.4605	32.5933	32.5911	32.5844	32.5732	32.3956	32.3905
	0.549463	-0.11176	Q9H0R6	Glutamyl-tRNA(Gln) amidotransferase subunit A, mitochondrial	QRSL1	6	6	15	57.46	10.098	26.506	26.4707	26.391	26.4218	26.1776	26.433	NaN	NaN	NaN	NaN	NaN	NaN
	0.277127	-0.111567	Q15121	Astrocytic phosphoprotein PEA-15	PEA15	5	5	53.1	15.04	37.8	29.6713	30.0479	29.8608	29.8623	29.8741	29.509	29.5898	29.5736	29.7973	29.3536	29.2331	29.3641
	1.40894	-0.111233	Q16643	Drebrin	DBN1	24	24	49.6	71.428	304.64	32.9797	32.9539	32.9171	32.8366	32.8955	32.7849	32.9081	33.0101	33.1783	32.7047	32.4259	32.7888
	0.381614	-0.111137	Q9ULX6	A-kinase anchor protein 8-like	AKAP8L	5	5	12.1	71.639	24.385	28.1795	28.2935	28.5352	28.1984	28.1312	28.3452	27.6389	27.9869	27.509	NaN	28.1263	27.6931
	1.02127	-0.111045	O95757	Heat shock 70 kDa protein 4L	HSPA4L	45	41	66.4	94.511	323.31	32.9729	33.025	33.0134	32.8865	32.9797	32.8119	33.2897	33.2336	33.1084	32.9882	32.9312	32.8829
	0.588685	-0.110714	O43707	Alpha-actinin-4	ACTN4	58	39	70.8	104.85	323.31	34.3101	34.5238	34.4083	34.2048	34.402	34.3033	34.2478	34.3303	34.5296	34.4209	34.1975	34.4823
	0.31214	-0.110401	Q96RT1	Protein LAP2	ERBB2IP	19	19	21.7	158.3	102.89	28.9344	29.2913	28.9287	28.805	29.0839	28.9344	29.1115	29.2331	29.3001	28.8474	28.8534	28.9567
	0.522669	-0.110249	P62701	40S ribosomal protein S4, X isoform	RPS4X	19	19	58.9	29.597	106.12	32.8974	32.7573	33.0512	32.8271	32.717	32.8309	32.333	32.2193	32.3646	32.8774	32.6713	32.8792
	0.456161	-0.109982	Q9UHY1	Nuclear receptor-binding protein	NRBP1	12	12	33.5	59.844	125.99	29.6285	29.9259	29.8974	29.6216	29.7517	29.7486	29.5826	29.7629	29.5862	29.8504	29.4113	29.4629
	0.128037	-0.109723	P13807	Glycogen [starch] synthase, muscle	GYS1	7	7	17	83.785	42.704	27.8445	28.2353	28.4394	27.5536	28.217	28.4194	28.0557	27.9428	27.6595	NaN	27.5014	27.4314
	0.141655	-0.10969	P21333	Filamin-A	FLNA	124	114	64.3	280.74	323.31	35.5613	36.0911	36.0491	35.3303	36.0552	35.9869	35.7824	35.9019	36.3118	36.097	35.8234	36.2828
	0.285449	-0.109479	Q8TBA6	Golgin subfamily A member 5	GOLGA5	10	10	21.9	83.023	158.79	27.7958	27.8741	28.066	27.5389	27.9539	27.9146	27.7645	27.7645	27.7833	NaN	28.4668	27.976
	0.156799	-0.109114	Q6VY07	Phosphofurin acidic cluster sorting protein 1	PACS1	4	4	6.6	104.9	4.0487	26.1245	25.2726	25.4676	25.4831	25.5898	25.4645	NaN	NaN	NaN	NaN	NaN	NaN
	0.267274	-0.109051	Q13505	Metaxin-1	MTX1	6	6	19.3	51.462	12.475	27.8916	28.1312	27.7325	27.9539	27.5826	27.8916	27.4707	27.4862	27.673	NaN	27.4154	27.8142
	0.222125	-0.108652	P20339	Ras-related protein Rab-5A	RAB5A	8	5	54	23.658	28.112	27.4862	27.217	27.2077	26.8741	27.2714	27.4394	27.9484	27.8858	27.5165	NaN	27.8142	27.8203
	0.412488	-0.108498	P35612	Beta-adducin	ADD2	10	10	23.1	80.853	39.316	28.003	28.0762	28.1459	27.8142	27.9203	28.1652	27.9595	27.8916	27.9316	NaN	27.6663	27.7453
	0.226397	-0.10837	Q92890	Ubiquitin fusion degradation protein 1 homolog	UFD1L	9	9	39.7	34.5	27.352	28.9705	28.7864	29.019	28.5014	28.8504	29.099	28.3536	28.141	28.604	28.4354	NaN	28.1937
	0.622039	-0.108114	Q9NR09	Baculoviral IAP repeat-containing protein 6	BIRC6	34	33	12.6	530.25	102.51	28.6595	28.5898	28.5536	28.3494	28.5646	28.5646	29.0583	29.003	28.7864	28.1795	28.4433	28.5536
	0.763132	-0.10803	Q9Y450	HBS1-like protein	HBS1L	18	18	35.2	75.472	69.235	30.0737	29.94	29.8623	29.8843	29.8127	29.8549	29.5754	29.7692	29.8385	29.4842	29.4334	29.1115
	0.737887	-0.107715	Q8NCA5	Protein FAM98A	FAM98A	11	10	32	55.4	164.31	30.0084	29.995	30.1361	29.84	29.995	29.9814	29.6998	29.7581	29.6285	30.0737	29.7146	29.6629
	0.471259	-0.107466	P46940	Ras GTPase-activating-like protein IQGAP1	IQGAP1	50	49	43	189.25	323.31	31.6798	31.8385	31.6839	31.4727	31.7613	31.6458	31.2422	31.4284	31.4334	31.8608	31.4134	31.4384
	0.700308	-0.107318	O14974	Protein phosphatase 1 regulatory subunit 12A	PPP1R12A	17	17	24.5	115.28	67.386	29.1507	29.2399	29.1819	29.1507	28.9539	29.1459	29.7565	30.0479	29.8474	29.6663	29.6595	29.6747
	0.438556	-0.107247	Q96RE7	Nucleus accumbens-associated protein 1	NACC1	7	7	20.5	57.258	10.51	26.8264	26.4785	26.6998	26.5638	26.515	26.604	NaN	NaN	26.3975	NaN	NaN	NaN
	1.17795	-0.106825	P42677	40S ribosomal protein S27	RPS27	5	3	41.7	9.461	12.452	30.846	30.8974	30.8974	30.8234	30.8004	30.6964	30.5109	30.5389	30.4433	30.7373	30.5389	30.5389
	0.322239	-0.106569	Q9H7Z7	Prostaglandin E synthase 2;Prostaglandin E synthase 2 truncated form	PTGES2	10	10	42.4	41.943	52.762	27.7645	27.5682	27.6458	27.7581	27.3324	27.5682	28.7581	28.4394	28.5609	28.6075	28.604	28.877
	0.215482	-0.10627	Q9H4H8	Protein FAM83D	FAM83D	2	2	5.8	64.424	34.871	24.8433	25.3811	24.8811	25.0412	24.976	24.7695	NaN	NaN	NaN	NaN	NaN	NaN
	0.519239	-0.106188	Q15477	Helicase SKI2W	SKIV2L	14	14	18.5	137.75	23.489	27.3324	27.524	27.4234	27.341	27.4314	27.189	27.3745	27.1507	27.3662	NaN	27.3992	27.0914
	0.260093	-0.106187	Q9NVI1	Fanconi anemia group I protein	FANCI	9	9	9.9	149.32	14.841	26.6595	26.3662	26.5195	26.5754	26.1332	26.518	26.425	26.2058	26.417	NaN	NaN	NaN
	0.927407	-0.105897	P27635	60S ribosomal protein L10	RPL10	10	10	46.7	24.604	118.28	32.1146	32.0316	32.1813	32.0641	31.9848	31.9609	32.0447	32.1084	32.2814	32.1453	32.4532	32.1021
	0.1015	-0.105792	Q13641	Trophoblast glycoprotein	TPBG	7	7	21.4	46.031	28.217	28.5315	29.1604	28.9456	28.2979	29.3971	28.6251	NaN	27.5969	28.0349	NaN	27.9088	27.7958
	0.782088	-0.105746	Q9H910	Hematological and neurological expressed 1-like protein	HN1L	6	6	51.6	20.063	15.107	29.604	29.6814	29.57	29.5573	29.5736	29.4073	29.7942	29.2445	29.8004	NaN	28.4354	29.4823
	0.143439	-0.105529	P0DMV9;P0DMV8	Heat shock 70 kDa protein 1B;Heat shock 70 kDa protein 1A	HSPA1B;HSPA1A	33	20	62.9	70.051	323.31	34.2336	34.2265	33.7751	34.3101	34.0673	33.5412	34.2619	34.2689	34.2549	34.3169	34.2408	33.9933
	0.506894	-0.105529	P37802	Transgelin-2	TAGLN2	14	14	74.9	22.391	277.28	33.0266	32.947	33.056	33.0398	32.7474	32.9259	31.6544	31.6964	32.1989	31.8196	31.846	32.3776
	0.328349	-0.105348	Q9Y5X3	Sorting nexin-5	SNX5	11	11	30.7	46.816	36.71	28.7739	28.9567	29.0813	28.6527	28.8564	28.9869	27.6931	26.7771	27.7195	NaN	NaN	27.4862
	0.477622	-0.104861	Q14974	Importin subunit beta-1	KPNB1	33	33	49.2	97.169	245.7	33.1285	32.9557	32.8366	32.9557	32.8309	32.8195	32.7985	32.8919	32.8176	32.6692	32.7109	32.7553
	0.427892	-0.104539	Q7L2H7	Eukaryotic translation initiation factor 3 subunit M	EIF3M	17	17	54.8	42.502	276.36	31.325	31.2924	31.1544	31.3142	31.1422	31.0017	31.4629	31.4678	31.325	31.325	31.1664	30.9814
	0.276314	-0.104195	Q5JTH9	RRP12-like protein	RRP12	12	12	14	143.7	45.94	28.5203	28.1604	28.3452	28.3704	28.019	28.3239	28.8112	28.9146	28.8324	28.8445	28.5426	28.8974
	0.330476	-0.103905	P48729;Q8N752	Casein kinase I isoform alpha;Casein kinase I isoform alpha-like	CSNK1A1;CSNK1A1L	8	8	26.7	38.914	12.186	27.4314	27.3828	27.1312	27.391	27.1312	27.1115	27.1604	27.4473	27.5389	27.604	27.4862	27.4785
	0.346345	-0.103629	P20042	Eukaryotic translation initiation factor 2 subunit 2	EIF2S2	22	22	67.3	38.388	323.31	31.2647	30.995	30.9746	31.1361	30.9117	30.8755	30.5573	30.995	30.947	31.08	30.846	30.9188
	0.672236	-0.103281	Q9NP79	Vacuolar protein sorting-associated protein VTA1 homolog	VTA1	9	9	33.2	33.879	59.613	29.604	29.5555	29.7755	29.5646	29.5591	29.5014	28.8858	28.9841	28.7292	28.8234	28.5536	28.8234
	0.459111	-0.102853	O43660	Pleiotropic regulator 1	PLRG1	12	12	43.6	57.193	48.357	29.2759	29.0401	29.109	29.094	28.906	29.1164	28.6697	28.5536	28.5352	29.1239	28.965	29.027
	0.171799	-0.101665	Q99627	COP9 signalosome complex subunit 8	COPS8	5	5	42.6	23.225	85.868	29.1842	28.7096	29.3662	29.0003	28.7895	29.1652	28.9117	28.4746	28.4629	29.0762	28.5352	28.4073
	0.414679	-0.101144	Q9BQG0	Myb-binding protein 1A	MYBBP1A	26	26	28.1	148.85	169.21	29.611	29.4274	29.4532	29.5352	29.2376	29.4154	29.7802	29.8534	29.8534	29.8112	29.5844	29.5987
	0.0310432	-0.10088	P09493	Tropomyosin alpha-1 chain	TPM1	19	8	48.2	32.708	76.105	29.6005	30.933	31.4433	28.6663	31.4234	31.5844	NaN	27.141	28.9456	NaN	NaN	28.8593
	0.864909	-0.0998294	P25398	40S ribosomal protein S12	RPS12	8	8	70.5	14.515	186.3	32.9347	32.8847	32.8645	32.8937	32.7453	32.7453	32.7907	32.6565	32.6544	32.715	32.7474	32.5527
	1.1565	-0.099706	Q9UPY3	Endoribonuclease Dicer	DICER1	42	42	33.5	218.68	209.55	29.9117	29.9539	29.8279	29.8309	29.7849	29.7786	30.1239	29.8218	30.1239	29.1604	29.6163	29.7895
	0.132881	-0.0996399	P67936	Tropomyosin alpha-4 chain	TPM4	27	16	66.1	28.521	323.31	34.5527	35.0184	35.212	34.4396	34.9975	35.0471	34.6361	34.6944	34.8928	35.2336	34.8928	34.9933
	0.0557424	-0.0992444	Q16595	Frataxin, mitochondrial;Frataxin intermediate form;Frataxin(56-210);Frataxin(78-210);Frataxin mature form	FXN	4	4	24.8	23.135	8.4345	26.604	26.533	25.6676	26.8623	26.53	25.1146	27.2353	27.8682	27.5014	28.8623	28.2714	27.5969
	0.47483	-0.0991433	P59998	Actin-related protein 2/3 complex subunit 4	ARPC4	7	7	54.2	19.667	19.028	30.4823	30.5664	30.6964	30.3515	30.5389	30.5573	31.8309	31.7047	31.7573	31.8645	31.717	31.6839
	0.225681	-0.0985743	Q07020	60S ribosomal protein L18	RPL18	8	8	42.6	21.634	53.869	31.8792	31.6242	31.8937	31.9814	31.4871	31.6329	31.611	31.7888	32.1331	32.8366	32.2279	32.1331
	0.0935636	-0.09843	P35754	Glutaredoxin-1	GLRX	5	5	70.8	11.776	49.267	28.0401	28.7357	28.8504	27.9595	28.4512	28.9203	NaN	NaN	NaN	NaN	NaN	NaN
	0.297327	-0.0983315	P27816	Microtubule-associated protein 4	MAP4	29	29	39.6	121	189.08	29.8445	29.9259	30.2193	29.7597	29.995	29.94	29.9259	29.8785	29.8127	29.2445	29.6561	29.7437
	0.352083	-0.0977027	O15381	Nuclear valosin-containing protein-like	NVL	11	11	18.8	95.05	32.508	27.7389	27.6663	27.673	27.8081	27.5536	27.4234	27.1214	26.9203	27.1984	27.1312	26.9869	27.0084
	0.410099	-0.0972385	Q92785	Zinc finger protein ubi-d4	DPF2	11	11	47.6	44.155	56.894	27.8916	27.9923	27.7129	27.7453	27.6798	27.8799	27.5463	27.4314	27.524	28.0401	27.9705	27.524
	0.690859	-0.0971794	O76003	Glutaredoxin-3	GLRX3	19	19	67.2	37.432	137.03	31.9539	32.025	32.1146	31.9814	31.846	31.9746	31.3879	31.2422	31.5435	31.4775	31.362	31.2924
	0.563781	-0.0971413	P48643	T-complex protein 1 subunit epsilon	CCT5	36	36	74.1	59.67	323.31	34.3892	34.3892	34.2689	34.3633	34.2549	34.1377	33.5179	33.6088	33.6522	33.5412	33.3303	33.2759
	0.216604	-0.0969067	Q9NYK5	39S ribosomal protein L39, mitochondrial	MRPL39	11	11	37.3	38.711	18.827	28.8564	28.459	28.6663	28.7802	28.3282	28.5826	28.3869	28.5052	28.5609	28.6075	28.579	28.8294
	0.271617	-0.0968552	Q96EP5	DAZ-associated protein 1	DAZAP1	6	6	23.3	43.383	17.459	29.7195	29.3367	29.5014	29.3217	29.3431	29.6022	29.2077	29.362	29.2935	29.668	29.8294	29.6492
	0.330813	-0.0968361	P84098	60S ribosomal protein L19	RPL19	6	6	27	23.466	29.473	31.196	30.9677	31.2703	30.94	31.2019	31.0017	30.9117	31.2759	31.2924	31.2422	31.3356	31.0544
	0.2947	-0.0961634	O00154	Cytosolic acyl coenzyme A thioester hydrolase	ACOT7	10	10	32.9	41.796	31.407	31.1544	30.8829	30.7453	30.8829	30.8901	30.7211	30.0479	30.1842	30.2193	30.0349	29.9814	29.8741
	0.205766	-0.0961157	Q9NX40	OCIA domain-containing protein 1	OCIAD1	6	6	33.5	27.626	14.834	28.7031	29.1312	29.1361	28.6798	29.0401	28.9622	28.9705	29.2216	29.3641	28.726	29.094	29.2535
	0.327299	-0.0960833	Q9NUD5	Zinc finger CCHC domain-containing protein 3	ZCCHC3	6	6	17.1	43.547	6.0991	26.1371	25.7441	25.8834	25.767	25.8927	25.8167	25.341	25.9517	25.8576	NaN	25.7103	25.9628
	0.27241	-0.0959428	Q8IXK0	Polyhomeotic-like protein 2	PHC2	4	3	5.5	90.712	5.6266	27.3494	27.3153	27.4629	27.3578	27.019	27.4629	26.9977	27.2077	27.4629	27.4629	27.2714	27.5315
	0.365132	-0.095932	O94855	Protein transport protein Sec24D	SEC24D	15	14	23.2	113.01	50.818	28.2847	28.4473	28.4394	28.1065	28.4234	28.3536	29.1795	29.3494	29.1065	29.1459	29.1189	29.2193
	0.867308	-0.0959187	O60841	Eukaryotic translation initiation factor 5B	EIF5B	27	27	30.7	138.83	131.22	30.6544	30.4919	30.5203	30.4823	30.4532	30.4433	30.947	31.1361	30.9609	30.9539	30.8901	30.8309
	0.395781	-0.0957146	P84095	Rho-related GTP-binding protein RhoG	RHOG	11	10	69.1	21.308	67.154	28.8945	29.0084	29.2054	28.8474	28.9977	28.976	29.9677	30.2308	30.0084	30.3724	30.2193	30.2077
	0.422313	-0.0955715	Q13442	28 kDa heat- and acid-stable phosphoprotein	PDAP1	10	10	45.9	20.63	95.201	29.8127	29.9814	29.9677	29.8638	29.94	29.6713	30.0737	29.8096	30.1483	29.9259	29.5463	29.9259
	0.140752	-0.095487	P10253	Lysosomal alpha-glucosidase;76 kDa lysosomal alpha-glucosidase;70 kDa lysosomal alpha-glucosidase	GAA	10	10	15.8	105.32	19.473	27.3494	27.3494	27.6931	27.4629	26.9428	27.6998	27.5969	27.5536	26.9977	28.0243	28.141	28.141
	0.282726	-0.0954558	Q04323	UBX domain-containing protein 1	UBXN1	11	11	49.5	33.325	224.01	30.9539	30.5481	30.7292	30.7129	30.5109	30.7211	30.5014	29.8901	30.5296	29.995	29.5555	30.0217
	0.193761	-0.0954113	Q9H2V7	Protein spinster homolog 1	SPNS1	4	4	12.9	56.629	10.698	26.5754	27.141	26.9203	26.726	26.965	26.6595	26.8019	26.7895	26.7645	27.524	27.2077	27.141
	0.912235	-0.09515	Q15428	Splicing factor 3A subunit 2	SF3A2	7	7	24.8	49.255	44.869	29.877	29.7645	29.7708	29.7517	29.6458	29.7292	29.49	29.3367	29.459	NaN	29.2054	29.4214
	0.310389	-0.0951099	O43617	Trafficking protein particle complex subunit 3	TRAPPC3	7	7	48.9	20.274	31.283	28.0711	27.9428	28.019	28.1459	27.8564	27.7453	28.3704	28.509	28.2625	28.8019	28.4433	27.7325
	0.718767	-0.0950902	O75348	V-type proton ATPase subunit G 1	ATP6V1G1	6	6	64.4	13.757	45.328	28.1604	28.2123	28.3023	28.1937	28.1507	28.0453	28.3066	28.3662	28.141	NaN	28.1361	28.249
	0.156674	-0.095026	P55210	Caspase-7;Caspase-7 subunit p20;Caspase-7 subunit p11	CASP7	10	10	50.2	34.276	263.7	28.3239	28.2216	27.9259	28.4073	28.0401	27.7389	27.4073	27.0711	26.8385	NaN	NaN	NaN
	0.217436	-0.0949345	Q9BSD7	Cancer-related nucleoside-triphosphatase	NTPCR	6	6	40.5	20.713	11.909	28.1984	27.8682	27.726	28.0243	27.7064	27.7771	28.3992	28.2399	27.9259	29.0686	28.3992	28.5203
	0.475199	-0.0948836	Q9H7D7	WD repeat-containing protein 26	WDR26	14	14	37.2	72.123	263.99	30.1361	30.0349	30.2077	30.1724	29.9539	29.9677	29.8974	29.8755	29.893	29.9117	29.84	29.8711
	0.372213	-0.0938969	P62899	60S ribosomal protein L31	RPL31	3	3	24.8	14.463	5.3592	31.3724	31.1115	31.4483	31.1783	31.2019	31.2703	30.6713	31.1664	31.0927	NaN	30.7771	31.2479
	0.49912	-0.0938657	Q86XP3	ATP-dependent RNA helicase DDX42	DDX42	20	20	39.4	102.97	226.47	29.6881	29.6964	29.8173	29.7517	29.509	29.6595	29.805	29.8234	29.8579	30.2193	29.8829	29.8726
	0.164236	-0.0938466	Q9NV96	Cell cycle control protein 50A	TMEM30A	6	6	20.5	40.683	72.411	27.7517	28.2399	28.0711	27.632	27.965	28.1842	NaN	NaN	NaN	NaN	NaN	NaN
	0.598268	-0.0936178	P15880	40S ribosomal protein S2	RPS2	13	13	49.8	31.324	36.727	32.6923	32.5014	32.635	32.4847	32.5978	32.4654	32.1177	32.2786	32.5412	32.6839	32.4775	32.686
	0.187246	-0.0935014	Q9GZR7	ATP-dependent RNA helicase DDX24	DDX24	14	14	27.9	96.331	67.212	27.4785	27.0711	26.9428	26.9428	27.2714	26.9977	27.7064	27.0296	27.509	27.6389	27.4154	27.3324
	0.235071	-0.0929209	Q99442	Translocation protein SEC62	SEC62	4	4	7	45.861	3.9349	27.8799	27.524	27.9316	27.524	27.7064	27.8264	27.8019	28.0711	27.8504	NaN	NaN	NaN
	0.57776	-0.0921199	P36578	60S ribosomal protein L4	RPL4	27	27	48.7	47.697	323.31	33.933	33.715	33.8422	33.7751	33.7653	33.6735	33.5412	33.4334	33.7653	33.4209	33.3828	33.6307
	0.384067	-0.0917403	Q9BW91	ADP-ribose pyrophosphatase, mitochondrial	NUDT9	11	11	38.9	39.125	21.847	27.7645	27.8081	27.524	27.6251	27.6798	27.5165	28.3992	28.4551	28.4862	NaN	28.4976	28.2891
	0.139086	-0.0916831	O43795	Unconventional myosin-Ib	MYO1B	17	17	22.4	131.98	58.861	28.9316	29.0003	28.249	28.6146	28.7195	28.5718	29.027	28.9896	29.5536	28.3951	29.0686	29.4274
	0.584931	-0.0916729	Q7Z4Q2	HEAT repeat-containing protein 3	HEATR3	8	8	14.4	74.582	39.231	28.0813	28.141	27.9088	27.9428	27.9484	27.965	27.509	27.2891	27.4154	27.2891	27.4785	27.1115
	0.269681	-0.091074	Q9BUF5	Tubulin beta-6 chain	TUBB6	24	11	76.7	49.857	152	31.4234	31.6586	31.6066	31.2422	31.5844	31.5889	30.4919	30.0609	30.611	30.0609	30.2869	30.5664
	0.435963	-0.0908883	O75694	Nuclear pore complex protein Nup155	NUP155	26	26	30	155.2	297.37	30.5203	30.4433	30.2535	30.393	30.2979	30.2535	30.3196	30.3724	30.5933	30.2647	30.2422	30.5203
	0.535197	-0.0908852	Q6L8Q7	2,5-phosphodiesterase 12	PDE12	8	8	23.8	67.351	44.154	28.3452	28.4707	28.4629	28.4314	28.217	28.3578	28.0505	28.1115	28.1115	NaN	27.9977	28.17
	0.273674	-0.0908286	Q86U44	N6-adenosine-methyltransferase 70 kDa subunit	METTL3	10	10	24	64.473	24.734	27.5536	27.6251	27.3066	27.4551	27.5315	27.2262	26.506	NaN	26.7771	NaN	26.965	NaN
	0.741355	-0.0908076	P05388;Q8NHW5	60S acidic ribosomal protein P0;60S acidic ribosomal protein P0-like	RPLP0;RPLP0P6	17	17	66.2	34.273	163.64	33.4209	33.5867	33.5641	33.4334	33.4702	33.3956	33.5062	33.4823	33.3828	33.7751	33.5412	33.4823
	0.529933	-0.090716	Q8NFQ8	Torsin-1A-interacting protein 2	TOR1AIP2	10	10	38.5	51.263	79.107	28.0084	28.1604	28.019	27.9977	28.0557	27.8623	28.3109	28.4314	28.4314	28.2308	28.2445	28.4154
	0.303341	-0.0903772	O60942	mRNA-capping enzyme;Polynucleotide 5-triphosphatase;mRNA guanylyltransferase	RNGTT	7	7	23.3	68.556	63.751	28.1361	27.8741	28.1652	27.9814	27.8264	28.0965	26.8623	NaN	27.3494	NaN	NaN	NaN
	0.359106	-0.0901769	O00443	Phosphatidylinositol 4-phosphate 3-kinase C2 domain-containing subunit alpha	PIK3C2A	4	4	3	190.68	5.1744	25.2303	25.2463	25.2679	25.1371	24.989	25.3477	25.4008	25.019	25.3975	NaN	24.976	NaN
	0.353546	-0.0901744	P62917	60S ribosomal protein L8	RPL8	9	9	45.9	28.024	109.26	32.3356	32.0705	32.2591	32.0512	32.2731	32.0705	31.8645	32.325	32.2422	32.9295	32.6923	32.6329
	0.240331	-0.0901515	P07954	Fumarate hydratase, mitochondrial	FH	19	19	58.8	54.636	253.55	33.1208	33.4083	33.1084	33.02	33.3436	33.0034	31.4727	31.5618	31.6629	31.9643	31.6629	31.9081
	0.416138	-0.0899709	P61247	40S ribosomal protein S3a	RPS3A	20	20	62.1	29.945	197.94	33.1192	32.9295	33.0017	32.846	33.0737	32.8608	32.4058	32.7109	32.8119	33.2759	33.005	32.9626
	0.653602	-0.0896689	P30419	Glycylpeptide N-tetradecanoyltransferase 1	NMT1	13	9	35.5	56.806	40.469	29.5278	29.5444	29.6646	29.5463	29.4012	29.5203	29.104	29.2399	29.2193	28.8623	29.258	29.1459
	0.161156	-0.089454	Q9Y2Z0	Suppressor of G2 allele of SKP1 homolog	SUGT1	13	13	43.6	41.024	36.255	30.0864	29.7292	29.5352	29.94	29.6544	29.4881	29.9259	29.6407	29.9259	NaN	29.2957	29.6005
	0.191136	-0.0891819	P49815	Tuberin	TSC2	14	14	13.5	200.61	60.816	27.4073	27.8324	27.7517	27.3662	27.7895	27.5682	27.509	27.611	27.8081	27.4314	27.3745	27.5389
	0.243019	-0.0891705	O60341	Lysine-specific histone demethylase 1A	KDM1A	18	18	38.4	92.902	126.71	29.7047	29.2891	29.5736	29.5481	29.2869	29.4649	29.2077	29.2147	29.1189	28.9231	29.104	29.1556
	0.168276	-0.0889765	P53634	Dipeptidyl peptidase 1;Dipeptidyl peptidase 1 exclusion domain chain;Dipeptidyl peptidase 1 heavy chain;Dipeptidyl peptidase 1 light chain	CTSC	10	10	27.2	51.853	114.01	30.7211	30.5664	30.9045	30.362	30.6022	30.9609	30.9045	30.7047	30.6544	31.0479	31.1052	31.0414
	0.170001	-0.0886135	Q10567	AP-1 complex subunit beta-1	AP1B1	26	11	30.3	104.64	30.24	28.0762	28.1312	28.066	27.611	28.1842	28.2123	28.3239	28.3282	27.9705	28.6458	28.4551	28.249
	0.174105	-0.0884647	Q3V6T2	Girdin	CCDC88A	10	10	7.3	216.04	41.426	26.673	27.0914	26.9428	26.5565	27.0711	26.8142	NaN	26.5898	26.0975	NaN	NaN	26.5898
	0.125222	-0.0884183	Q8TED0	U3 small nucleolar RNA-associated protein 15 homolog	UTP15	11	11	23.9	58.414	20.366	27.5463	27.5389	27.217	27.8142	27.0914	27.1312	27.141	27.019	27.391	26.9088	27.2077	27.0914
	0.329692	-0.0882715	Q9UNS2	COP9 signalosome complex subunit 3	COPS3	10	10	35.7	47.873	261.94	29.7517	29.4473	29.5315	29.5951	29.4919	29.3787	29.7833	29.7486	29.6181	29.9117	29.6646	29.4649
	0.720315	-0.0882098	P11142	Heat shock cognate 71 kDa protein	HSPA8	46	34	75.9	70.897	323.31	36.6787	36.7428	36.6388	36.6522	36.6388	36.5047	36.3796	36.4596	36.4973	36.4272	36.2514	36.2102
	0.275727	-0.0879345	P50579	Methionine aminopeptidase 2	METAP2	17	17	56.3	52.891	323.31	30.2193	30.4919	30.5296	30.1604	30.4032	30.4134	29.8974	30.099	30.0609	30.2535	29.9814	29.9677
	0.302734	-0.0877082	Q4V328	GRIP1-associated protein 1	GRIPAP1	14	14	28.4	96.004	100.55	27.3578	27.673	27.5389	27.2979	27.5536	27.4551	27.2714	27.3239	27.1507	NaN	26.8019	NaN
	0.244283	-0.0872275	Q15629	Translocating chain-associated membrane protein 1	TRAM1	5	5	12.3	43.071	8.2938	27.7129	27.3828	27.8385	27.509	27.5315	27.632	27.7708	28.2308	28.2077	28.7389	28.4512	28.5463
	0.358415	-0.0871353	Q9ULC4	Malignant T-cell-amplified sequence 1	MCTS1	7	7	49.7	20.555	161.11	30.5203	30.196	30.4032	30.2193	30.341	30.2979	29.8608	30.3515	30.0084	30.8901	30.3724	30.2193
	0.307457	-0.0870673	O00267	Transcription elongation factor SPT5	SUPT5H	18	18	26.9	121	177.42	29.2803	29.2602	29.3066	29.0349	29.4174	29.1337	27.7389	27.6458	28.203	27.17	27.3578	27.2353
	0.901175	-0.0870209	Q96H79	Zinc finger CCCH-type antiviral protein 1-like	ZC3HAV1L	9	9	45.7	32.962	152	30.1604	30.2077	30.1361	30.0349	30.1604	30.0479	30.5296	30.3515	30.9677	29.0057	29.8579	30.2535
	0.120422	-0.0870101	Q9BQC3	Diphthamide biosynthesis protein 2	DPH2	2	2	9	52.082	6.2063	26.3083	25.7019	26.4073	25.9473	25.8717	26.3376	25.9111	NaN	25.9134	NaN	NaN	NaN
	0.684272	-0.0869013	P61158	Actin-related protein 3	ACTR3	22	19	70.8	47.371	269.13	31.846	31.8497	31.9259	31.6839	31.8422	31.8347	33.0495	33.02	33.0463	33.4458	33.2336	33.015
	0.186184	-0.0865657	P41091;Q2VIR3	Eukaryotic translation initiation factor 2 subunit 3;Putative eukaryotic translation initiation factor 2 subunit 3-like protein	EIF2S3;EIF2S3L	18	18	46.6	51.109	184.91	32.2703	31.8422	31.9295	32.1634	31.8497	31.7692	31.4083	31.6923	31.7333	32.3061	31.9677	31.8534
	0.150407	-0.0865307	Q9H583	HEAT repeat-containing protein 1;HEAT repeat-containing protein 1, N-terminally processed	HEATR1	35	35	21.4	242.37	105.91	29.5463	29.3044	29.0003	29.4314	28.9316	29.2285	29.3704	29.4649	29.3196	29.1795	29.3174	29.3088
	0.648253	-0.086394	P39019	40S ribosomal protein S19	RPS19	9	9	44.8	16.06	23.397	31.8865	31.8271	31.9295	31.6964	31.8119	31.8755	31.5109	31.6022	31.525	32.1392	31.9081	31.9224
	0.33979	-0.0860386	Q9NQ88	Fructose-2,6-bisphosphatase TIGAR	TIGAR	10	10	53.3	30.062	88.15	29.2557	29.3951	29.509	29.3131	29.4234	29.1652	30.6458	30.5014	30.5754	30.7692	30.7849	30.4134
	0.462548	-0.0860221	Q15819	Ubiquitin-conjugating enzyme E2 variant 2	UBE2V2	11	6	75.9	16.363	43.622	30.7211	30.5754	30.4727	30.5664	30.5014	30.4433	30.6713	30.6458	30.4334	31.1115	30.7211	30.7129
	0.124209	-0.0858498	Q9P0J1	[Pyruvate dehydrogenase [acetyl-transferring]]-phosphatase 1, mitochondrial	PDP1	8	8	20.7	61.053	31.552	26.0813	26.0955	26.4441	25.9225	25.8741	26.5667	26.8264	27.1115	27.17	27.0401	27.7129	27.6181
	0.169488	-0.0857398	Q5TH69	Brefeldin A-inhibited guanine nucleotide-exchange protein 3	ARFGEF3	14	14	11.3	240.65	174.65	28.1015	28.3324	28.4976	28.1065	28.0401	28.5278	NaN	NaN	NaN	NaN	NaN	NaN
	0.437223	-0.0857156	P30519	Heme oxygenase 2	HMOX2	10	10	48.4	36.032	55.082	29.1386	29.1164	29.3536	29.0479	29.1312	29.1724	29.341	29.4433	29.55	29.509	29.4785	29.4174
	0.62821	-0.0856056	Q08209	Serine/threonine-protein phosphatase 2B catalytic subunit alpha isoform	PPP3CA	9	5	24.2	58.687	20.371	28.9484	29.0711	28.8623	28.8799	28.8887	28.8564	29.1984	29.21	29.391	29.1459	28.976	29.027
	0.642558	-0.0855134	Q9Y262	Eukaryotic translation initiation factor 3 subunit L	EIF3L	26	26	49.8	66.726	323.31	31.2422	31.1783	31.0737	31.1483	31.0479	31.0414	31.1483	31.2077	31.0217	31.3463	31.196	30.94
	0.241721	-0.0855096	Q9Y3X0	Coiled-coil domain-containing protein 9	CCDC9	5	5	14.9	59.702	36.073	26.8142	26.9869	27.0609	26.632	26.965	27.0084	26.976	27.189	26.9977	NaN	27.019	26.8142
	0.41614	-0.0853373	P04899	Guanine nucleotide-binding protein G(i) subunit alpha-2	GNAI2	18	11	63.1	40.45	234.16	30.4629	30.6285	30.3515	30.3303	30.4433	30.4134	31.2422	31.4083	31.1052	31.4823	31.5062	31.4384
	0.28733	-0.0853284	O15498	Synaptobrevin homolog YKT6	YKT6	6	6	44.4	22.417	29.024	29.2445	29.5933	29.4154	29.203	29.4093	29.3848	29.4374	29.5518	29.5222	29.5481	29.6058	29.3044
	0.273039	-0.0851701	P14735	Insulin-degrading enzyme	IDE	34	34	42.4	117.97	114.44	31.2019	31.341	31.4032	31.015	31.2979	31.3776	30.6798	30.8309	30.7129	30.0479	30.362	30.3828
	0.315905	-0.0847219	P51148	Ras-related protein Rab-5C	RAB5C	9	6	60.6	23.482	34.005	30.7771	30.7533	30.7047	30.5573	30.5481	30.8755	30.7613	30.94	30.6198	31.015	30.9677	30.6713
	0.314017	-0.0845159	Q9Y5S2	Serine/threonine-protein kinase MRCK beta	CDC42BPB	24	24	23	194.31	79.844	28.9869	29.217	29.258	28.9287	29.1507	29.1288	29.6492	29.5352	29.2803	29.2935	29.6146	29.1913
	0.482537	-0.0842864	O15355	Protein phosphatase 1G	PPM1G	16	16	46.5	59.271	316.36	30.9045	30.8534	30.8385	30.8974	30.6458	30.8004	30.5933	30.6544	30.6544	30.9609	30.5296	30.5933
	0.307356	-0.0839615	Q9BQ67	Glutamate-rich WD repeat-containing protein 1	GRWD1	10	10	36.3	49.419	81.76	28.8623	28.9088	28.9203	28.9259	28.5933	28.9203	28.3578	28.3787	28.6355	28.8234	28.7389	28.6146
	0.209708	-0.0838102	Q03701	CCAAT/enhancer-binding protein zeta	CEBPZ	16	16	21.4	120.97	66.354	28.8741	28.5609	28.3494	28.5573	28.4629	28.5128	28.1065	28.019	28.362	28.0813	28.509	28.1604
	0.263556	-0.0837205	Q9UNZ2	NSFL1 cofactor p47	NSFL1C	10	10	41.1	40.572	152.51	30.2869	30.4629	30.5109	30.1604	30.3196	30.5296	29.6948	29.1312	29.7723	28.5426	29.6128	29.2714
	0.704986	-0.0836646	P84085	ADP-ribosylation factor 5	ARF5	11	7	80	20.529	52.966	31.9677	32.1392	32.1084	32.0117	31.9712	31.9814	32.4847	32.5014	32.3879	32.8042	32.4678	32.3515
	0.116177	-0.0834548	P48507	Glutamate--cysteine ligase regulatory subunit	GCLM	7	7	44.2	30.727	44.618	28.8564	29.3023	29.2803	28.6355	29.21	29.3431	NaN	NaN	NaN	NaN	NaN	NaN
	0.183713	-0.0832367	Q14344	Guanine nucleotide-binding protein subunit alpha-13	GNA13	12	12	41.9	44.049	38.225	28.1747	28.3494	28.1214	28.1604	28.391	27.8445	29.1115	28.9456	28.6964	29.3787	29.2376	28.7613
	0.254269	-0.0830771	Q9Y2W2	WW domain-binding protein 11	WBP11	12	12	22	69.997	59.63	28.5573	28.7162	28.7802	28.3787	28.7227	28.7031	27.7771	NaN	28.4473	NaN	NaN	28.4746
	0.414927	-0.0827319	P29692	Elongation factor 1-delta	EEF1D	17	16	64.4	31.121	323.31	33.6629	33.8042	33.8234	33.5527	33.7849	33.7047	33.6629	33.6629	33.715	33.6198	33.5179	33.4458
	0.168949	-0.0822811	Q9Y613	FH1/FH2 domain-containing protein 1	FHOD1	25	25	34.1	126.55	116.22	29.2054	29.0531	28.7708	29.1913	28.8203	28.7708	29.0583	28.9146	28.9705	27.7708	28.3951	27.9595
	0.201883	-0.0815659	Q6P582;Q6NZ67	Mitotic-spindle organizing protein 2A;Mitotic-spindle organizing protein 2B	MZT2A;MZT2B	4	4	39.9	16.22	12.906	25.7286	25.2454	25.3204	25.433	25.3101	25.3066	26.217	25.7312	25.9495	NaN	NaN	25.6181
	0.224869	-0.0812302	Q14315	Filamin-C	FLNC	135	123	68	291.02	323.31	35.7252	36.0101	36.0308	35.6388	35.9483	35.9352	35.6918	35.7302	35.6171	35.8375	35.6496	35.6006
	0.679861	-0.0810553	Q6P2E9	Enhancer of mRNA-decapping protein 4	EDC4	40	40	49.5	151.66	323.31	30.8234	30.7927	30.7047	30.6964	30.7613	30.6198	30.7292	30.6964	30.7849	30.7613	30.7849	30.6458
	0.923553	-0.0810407	P60866	40S ribosomal protein S20	RPS20	6	6	46.2	13.373	21.888	32.0895	31.9746	32.0084	31.9882	31.9259	31.9153	31.6713	32.0283	31.9224	32.7109	32.2979	32.0512
	0.104348	-0.0810388	Q7Z7H8	39S ribosomal protein L10, mitochondrial	MRPL10	3	3	17.6	29.282	7.7078	27.1115	26.4692	26.8974	27.1115	26.726	26.3974	26.9869	27.0711	26.7517	NaN	27.0813	27.5898
	0.27572	-0.0808996	O75347	Tubulin-specific chaperone A	TBCA	11	11	63.9	12.855	149.34	32.2619	31.8645	32.0117	32.005	31.9539	31.9365	31.901	32.0512	31.8755	31.94	31.9153	32.1453
	0.496635	-0.0807444	O15143	Actin-related protein 2/3 complex subunit 1B	ARPC1B	13	12	49.2	40.949	299.06	30.9609	31.08	31.0414	30.9677	30.8309	31.0414	32.1724	32.1901	32.1239	32.4032	32.2731	32.2507
	0.938192	-0.0806382	O14617	AP-3 complex subunit delta-1	AP3D1	28	28	33	130.16	150.54	30.0609	29.9814	30.0737	29.9539	30.0084	29.9117	30.5844	30.5389	30.3724	30.5933	30.4433	30.4919
	0.543175	-0.0804672	P62195	26S protease regulatory subunit 8	PSMC5	26	25	64.3	45.626	312.16	32.08	32.2135	32.2279	32.0447	32.0512	32.1842	31.7413	31.6798	31.7088	31.7453	31.6066	31.717
	0.176006	-0.0802727	P12109	Collagen alpha-1(VI) chain	COL6A1	22	22	37.5	108.53	239.48	31.0414	30.9746	30.5573	30.8081	30.9045	30.6198	31.1901	31.1664	30.4727	31.6756	31.3142	30.5389
	0.400092	-0.0799491	P62879	Guanine nucleotide-binding protein G(I)/G(S)/G(T) subunit beta-2	GNB2	15	8	67.4	37.331	216.12	31.2535	31.1604	31.1115	31.015	31.2422	31.0283	31.6458	31.5527	31.3088	32.0283	31.8534	31.6881
	0.244887	-0.0796916	Q99575	Ribonucleases P/MRP protein subunit POP1	POP1	18	18	28.1	114.71	296.97	28.5573	28.2759	28.55	28.3578	28.2399	28.5463	27.965	28.066	28.3704	28.4823	28.5426	28.611
	0.137625	-0.0793463	P83731	60S ribosomal protein L24	RPL24	4	4	25.5	17.779	9.5908	31.4967	30.9882	31.5664	31.0927	31.2479	31.4727	29.7389	28.7292	30.8309	NaN	30.2869	30.7047
	0.576027	-0.0791849	Q08J23	tRNA (cytosine(34)-C(5))-methyltransferase	NSUN2	35	35	66.6	86.47	199.24	31.08	31.1361	31.099	31.0217	30.9259	31.13	30.9609	30.7613	31.0673	30.7211	30.7613	30.8901
	0.0740741	-0.0790653	O14558	Heat shock protein beta-6	HSPB6	5	5	55	17.135	22.294	27.7895	28.632	28.3704	27.6251	28.4785	28.4512	29.1337	28.5014	29.4629	NaN	28.0084	28.6629
	0.38658	-0.0790399	P62269	40S ribosomal protein S18	RPS18	8	8	43.4	17.718	38.05	31.7494	31.5203	31.7533	31.6629	31.5933	31.5296	30.9539	30.7613	31.0737	31.8974	31.2924	31.3724
	0.4347	-0.078942	Q12857	Nuclear factor 1 A-type	NFIA	11	8	44.8	55.944	129.37	30.5573	30.4629	30.3303	30.4532	30.3196	30.341	29.1628	29.7973	29.9814	30.7373	30.2869	30.4032
	0.195017	-0.0789344	Q15021	Condensin complex subunit 1	NCAPD2	23	23	24.2	157.18	165.83	29.6407	29.4134	29.189	29.4374	29.1676	29.4012	28.8534	28.8829	29.1652	NaN	26.9203	28.7064
	0.445362	-0.0787093	P51665	26S proteasome non-ATPase regulatory subunit 7	PSMD7	11	11	46.9	37.025	97.24	30.4919	30.341	30.2308	30.2647	30.2869	30.2759	30.5933	30.4532	30.2759	28.5898	30.1604	30.3088
	0.41002	-0.0784785	P08238	Heat shock protein HSP 90-beta	HSP90AB1	49	28	60.5	83.263	323.31	35.547	35.6143	35.4458	35.5441	35.4973	35.3303	36.0101	36.0812	36.0753	35.7124	35.7302	35.7175
	0.263518	-0.0777855	P63244	Guanine nucleotide-binding protein subunit beta-2-like 1;Guanine nucleotide-binding protein subunit beta-2-like 1, N-terminally processed	GNB2L1	21	21	87.4	35.076	323.31	34.0349	33.715	33.9242	33.9063	33.6735	33.8608	33.6839	33.3698	33.4943	33.2619	33.4581	33.6735
	0.226148	-0.0772196	Q9BQE3	Tubulin alpha-1C chain	TUBA1C	31	3	81.7	49.895	92.729	29.4938	29.3807	29.141	29.1386	29.4214	29.2239	29.4134	29.1263	29.5844	27.0296	27.8264	29.3828
	0.446552	-0.0770308	Q13362	Serine/threonine-protein phosphatase 2A 56 kDa regulatory subunit gamma isoform	PPP2R5C	12	6	27.3	61.06	9.7184	26.9977	27.1604	27.0914	26.8974	27.0296	27.0914	26.8504	26.9539	26.8264	NaN	NaN	26.6865
	0.115982	-0.0768795	Q7Z3C6	Autophagy-related protein 9A	ATG9A	10	10	16.8	94.446	17.911	27.4314	27.0505	26.9539	27.4473	26.8264	26.9316	26.9869	27.0401	27.17	NaN	NaN	26.1927
	0.198864	-0.0766188	O14828	Secretory carrier-associated membrane protein 3	SCAMP3	10	10	40.1	38.287	35.15	29.6781	29.7502	29.3869	29.7146	29.49	29.3807	29.0788	29.3153	29.1507	28.5609	28.5573	28.6146
	0.297444	-0.0765114	P50502;Q8NFI4;Q8IZP2	Hsc70-interacting protein;Putative protein FAM10A5;Putative protein FAM10A4	ST13;ST13P5;ST13P4	10	10	27.6	41.331	58.974	31.8081	31.8534	31.6242	31.5481	31.8157	31.6923	31.099	31.1604	30.9882	31.4483	31.1664	31.0349
	0.36018	-0.0764961	Q9UI12	V-type proton ATPase subunit H	ATP6V1H	9	9	28.4	55.882	50.101	28.1164	28.3196	28.0453	28.019	28.1263	28.1065	28.249	28.509	28.003	28.0711	28.066	27.7708
	0.737645	-0.0755704	Q13098	COP9 signalosome complex subunit 1	GPS1	14	14	36.3	55.536	95.395	29.6798	29.7629	29.84	29.7014	29.6747	29.6798	29.579	29.5916	29.6544	30.3196	29.6544	29.6022
	0.322083	-0.0755138	Q96CS3	FAS-associated factor 2	FAF2	18	18	67.6	52.623	114.65	30.2647	30.099	30.0479	30.0609	30.1842	29.94	30.5389	30.7292	30.7373	31.0479	30.6458	30.611
	0.375039	-0.0752926	P62851	40S ribosomal protein S25	RPS25	4	4	24	13.742	9.5152	31.8497	31.6198	31.8081	31.7006	31.7533	31.5978	31.2924	31.5618	31.5978	31.94	31.8119	31.9505
	0.125347	-0.0747821	Q14699	Raftlin	RFTN1	4	4	14.4	63.145	17.969	25.8568	26.604	26.2811	26.1795	26.2207	26.1174	NaN	NaN	NaN	NaN	NaN	NaN
	0.303503	-0.074763	P62140	Serine/threonine-protein phosphatase PP1-beta catalytic subunit	PPP1CB	19	7	68.8	37.186	31.567	29.632	29.6146	29.8489	29.588	29.7517	29.5315	29.6964	29.7389	29.5184	29.9117	29.6268	29.7195
	0.22667	-0.0746962	Q8N6M0	OTU domain-containing protein 6B	OTUD6B	5	5	35.8	33.812	33.469	27.2535	27.5315	27.4073	27.4314	27.4154	27.1214	27.965	27.7708	28.2445	27.6798	NaN	27.7645
	0.614973	-0.0746193	Q15366	Poly(rC)-binding protein 2	PCBP2	16	12	71.5	38.58	72.105	32.8737	32.8157	32.8719	32.8737	32.7653	32.6985	32.6285	32.5933	32.7211	32.1989	32.5038	32.4895
	0.898193	-0.0745894	O15294	UDP-N-acetylglucosamine--peptide N-acetylglucosaminyltransferase 110 kDa subunit	OGT	29	29	40.8	116.92	149.76	30.196	30.1483	30.099	30.1115	30.0864	30.0217	29.8741	29.7325	30.0349	27.524	29.3066	29.6022
	0.37778	-0.0741037	Q9UBC2	Epidermal growth factor receptor substrate 15-like 1	EPS15L1	26	26	49.2	94.254	133.64	29.8234	29.8623	29.8858	29.6355	29.9117	29.8019	29.6781	29.7486	29.611	30.0479	29.7405	29.5933
	0.425357	-0.0734615	Q9BVJ6	U3 small nucleolar RNA-associated protein 14 homolog A	UTP14A	9	9	21.8	87.977	22.088	26.8142	26.6595	26.8974	26.6998	26.6865	26.7645	26.3943	26.2838	26.5898	26.3444	26.2589	26.17
	0.18168	-0.073349	Q6FI81	Anamorsin	CIAPIN1	10	10	40.7	33.582	64.298	29.9677	29.8638	29.5071	29.8234	29.6948	29.6005	29.6163	29.7676	29.7786	29.9259	29.5184	29.3346
	0.175959	-0.0733261	Q9Y276	Mitochondrial chaperone BCS1	BCS1L	8	8	27.7	47.534	15.621	27.5609	27.1507	27.1214	27.0711	27.2353	27.3066	27.1312	27.141	27.1604	27.4154	27.5014	27.611
	0.0768799	-0.0732047	Q9Y3L5	Ras-related protein Rap-2c	RAP2C	6	4	48.6	20.745	32.486	27.4551	28.3452	27.7453	27.3578	27.9923	27.976	27.7129	27.8445	27.4073	28.3367	27.8324	27.9484
	0.464888	-0.0730426	Q04917	14-3-3 protein eta	YWHAH	18	16	58.5	28.218	201.67	31.0737	31.225	31.2647	31.0479	31.13	31.1664	30.8974	30.9259	30.8608	31.2135	30.933	30.9539
	0.615542	-0.0724462	Q15365	Poly(rC)-binding protein 1	PCBP1	17	14	84.8	37.497	323.31	34.0184	34.0017	33.87	33.9153	33.9153	33.8422	33.4458	33.3303	33.6629	33.015	32.362	33.2897
	0.605004	-0.0722294	Q13347	Eukaryotic translation initiation factor 3 subunit I	EIF3I	18	18	74.8	36.501	120.6	31.2924	31.13	31.2135	31.1901	31.1052	31.1239	31.0349	31.099	31.2647	30.7613	30.7453	31.1239
	0.425209	-0.072094	Q9Y696	Chloride intracellular channel protein 4	CLIC4	20	19	83.4	28.772	251.06	32.8328	33.0117	32.8271	32.7494	32.8865	32.8195	33.3169	33.2048	33.2897	33.099	33.2178	33.3698
	0.101386	-0.0719592	P15311	Ezrin	EZR	34	23	53.6	69.412	323.31	31.0927	31.4384	31.6501	30.9609	31.3672	31.6372	30.6022	30.4727	30.6964	30.5844	30.8004	30.7771
	0.391293	-0.0714359	P43686	26S protease regulatory subunit 6B	PSMC4	27	27	83	47.366	211.72	31.8081	31.8042	31.8829	31.6285	31.7731	31.8792	31.5062	31.6242	31.5435	31.6372	31.3724	31.5978
	0.207084	-0.0709076	Q9UQ80	Proliferation-associated protein 2G4	PA2G4	26	26	77.2	43.786	323.31	33.2193	33.0398	33.0512	33.2619	32.9729	32.8627	33.2759	33.2478	33.2478	33.3169	33.2004	33.0974
	0.23955	-0.0708752	Q9NVA2	Septin-11	2020-09-11	15	9	49	49.398	318.16	31.4871	31.7771	31.6022	31.4134	31.6923	31.5481	30.9882	31.0927	31.1724	31.1664	30.8755	31.2422
	0.171194	-0.070453	Q9H8H0	Nucleolar protein 11	NOL11	8	8	20.2	81.123	23.642	28.49	28.6181	28.3578	28.6898	28.2625	28.3023	28.2353	28.2077	28.1015	28.2262	28.2714	28.4113
	1.13175	-0.0701955	O14818	Proteasome subunit alpha type-7	PSMA7	14	9	64.1	27.887	235.6	32.1208	32.1724	32.2077	32.1239	32.0927	32.0737	32.2507	32.1931	32.2365	32.5822	32.1783	32.3672
	1.34187	-0.0700258	P52888	Thimet oligopeptidase	THOP1	15	15	24.4	78.839	64.963	29.6058	29.5844	29.5444	29.4823	29.5033	29.5389	29.766	29.8081	29.7692	30.1239	29.9117	29.7325
	0.300558	-0.069938	Q92616	Translational activator GCN1	GCN1L1	85	85	43.5	292.75	323.31	30.933	30.9609	30.7533	30.94	30.7047	30.7927	31.6415	31.6923	31.6415	31.5978	31.6285	31.5203
	0.410299	-0.069924	Q13190	Syntaxin-5	STX5	4	4	18.6	39.672	13.631	26.0914	26.2262	26.0629	25.9606	26.1391	26.0711	26.3273	NaN	26.3239	NaN	25.945	26.3943
	0.359679	-0.0698967	Q53HC9	Protein TSSC1	TSSC1	7	7	29.2	43.603	14.552	27.2535	27.217	27.1507	27.2077	26.9869	27.217	27.217	27.341	27.4234	NaN	27.141	27.189
	0.538791	-0.0698662	Q86UL3	Glycerol-3-phosphate acyltransferase 4	AGPAT6	4	4	8.8	52.07	12.201	27.3324	27.341	27.4707	27.2445	27.3662	27.3239	26.433	26.965	27.0296	NaN	26.8264	26.9088
	0.492548	-0.0697842	Q9NY33	Dipeptidyl peptidase 3	DPP3	16	16	40.8	82.588	263.08	30.4234	30.5481	30.4727	30.3515	30.5109	30.3724	30.6964	30.6458	30.5933	31.1783	30.7849	30.7292
	0.10494	-0.0697638	Q8NBJ4	Golgi membrane protein 1	GOLM1	5	5	16	45.333	9.9984	26.29	26.673	26.9203	26.3629	26.4488	26.8623	NaN	NaN	NaN	NaN	NaN	NaN
	0.526418	-0.0696901	Q9Y4W2	Ribosomal biogenesis protein LAS1L	LAS1L	15	15	35.1	83.064	67.541	28.0243	28.0557	28.1164	28.0965	27.965	27.9259	28.2262	28.1015	28.1214	27.8623	28.3239	28.5052
	0.19221	-0.0695407	P45985	Dual specificity mitogen-activated protein kinase kinase 4	MAP2K4	7	7	33.3	44.287	21.684	27.1312	27.2979	27.217	27.2803	26.8858	27.2714	27.6389	28.003	27.6458	NaN	27.4629	27.7771
	0.115643	-0.0693804	Q9GZP4	PITH domain-containing protein 1	PITHD1	8	8	44.1	24.178	46.44	28.4394	28.0401	27.9203	28.3196	28.0762	27.7958	NaN	NaN	NaN	NaN	NaN	NaN
	0.0690987	-0.0692565	Q9Y3C8	Ubiquitin-fold modifier-conjugating enzyme 1	UFC1	7	7	29.9	19.458	9.9871	29.6814	28.6146	29.0084	29.2803	28.7325	29.0839	29.5259	28.8623	28.8415	29.019	29.2376	28.7645
	0.195643	-0.0691624	Q8WUW1	Protein BRICK1	BRK1	2	2	32	8.7448	12.275	26.632	26.8858	26.4409	26.6458	26.604	26.5014	27.0914	27.2803	27.0609	27.0609	26.9977	26.5667
	0.316086	-0.0689926	O95104	Splicing factor, arginine/serine-rich 15	SCAF4	8	6	12.1	125.87	42.689	28.1459	28.17	28.4032	28.1015	28.217	28.1937	27.673	NaN	NaN	27.9088	NaN	27.5463
	0.0654097	-0.0688648	Q7Z3E5	LisH domain-containing protein ARMC9	ARMC9	19	19	32.8	91.818	34.35	28.2891	27.4785	28.1937	28.249	28.1065	27.3992	29.5682	28.9456	30.0864	27.1312	27.1604	28.8974
	0.407988	-0.0683804	Q9Y617	Phosphoserine aminotransferase	PSAT1	21	21	70.5	40.422	209.82	31.4678	31.3463	31.4433	31.3724	31.2365	31.4433	32.9045	32.8328	32.6394	32.333	32.648	32.2365
	0.150423	-0.0683409	P62857	40S ribosomal protein S28	RPS28	4	4	40.6	7.8409	96.568	31.5799	31.2703	31.611	31.5709	31.525	31.1604	31.3982	31.6756	31.6629	31.3828	30.933	31.6415
	0.360538	-0.0683187	P61221	ATP-binding cassette sub-family E member 1	ABCE1	18	18	37.4	67.314	152.32	31.6329	31.5062	31.4433	31.5664	31.4334	31.3776	31.3356	31.2814	31.3776	31.0927	31.0927	31.1422
	0.212542	-0.0682805	Q9H5Q4	Dimethyladenosine transferase 2, mitochondrial	TFB2M	5	5	16.2	45.348	7.8364	26.8858	26.5565	26.6181	26.7645	26.5433	26.5478	26.0914	26.3844	26.5448	NaN	25.918	26.6181
	0.692783	-0.0682055	P05386	60S acidic ribosomal protein P1	RPLP1	6	5	95.6	11.514	151.08	33.6522	33.7353	33.6198	33.5527	33.6522	33.5978	33.8608	33.8234	33.5527	33.9505	33.933	33.5179
	0.526115	-0.0681794	P35611	Alpha-adducin	ADD1	21	21	48.2	80.954	101.8	30.6964	30.5296	30.5296	30.4919	30.5296	30.5296	31.4919	31.2422	31.5799	31.0349	31.3088	31.4234
	0.486343	-0.0681483	P17987	T-complex protein 1 subunit alpha	TCP1	32	32	73	60.343	248.9	34.0184	34.099	33.9933	34.0592	33.9677	33.8792	33.02	32.8919	32.901	33.1857	32.881	32.7946
	0.0811143	-0.0679518	O15247	Chloride intracellular channel protein 2	CLIC2	16	15	75.7	28.356	158.01	29.5536	29.2147	28.9732	29.4433	29.4012	28.6931	30.7047	30.611	29.995	30.8534	30.8004	30.341
	0.187987	-0.0679334	O95573	Long-chain-fatty-acid--CoA ligase 3	ACSL3	27	26	50.3	80.419	258.72	31.9882	31.6798	31.7006	31.8719	31.7494	31.5435	32.0117	32.2106	31.9814	32.4284	32.1453	31.9882
	0.231711	-0.0676022	P62820	Ras-related protein Rab-1A	RAB1A	12	5	68.3	22.677	65.716	29.7309	29.673	29.5389	29.4032	29.5898	29.747	29.8974	30.1604	30.0084	30.0609	30.2193	29.8945
	0.198453	-0.0670827	Q96EK6	Glucosamine 6-phosphate N-acetyltransferase	GNPNAT1	6	6	56.5	20.749	34.252	29.1507	29.0296	29.3088	29.0889	28.9231	29.2759	27.3578	27.5014	26.7129	NaN	NaN	27.5682
	0.176014	-0.0670255	Q9H0V9	VIP36-like protein	LMAN2L	5	5	21	39.71	10.025	27.217	27.4551	27.1115	27.019	27.189	27.3745	26.1174	26.726	NaN	NaN	NaN	26.5359
	0.64768	-0.0665989	P20338	Ras-related protein Rab-4A	RAB4A	8	8	42.2	24.389	16.726	28.203	28.1214	28.1115	28.0505	28.1507	28.0349	27.5536	27.6663	27.7517	27.7195	27.5315	27.4707
	0.173306	-0.0665194	P55060	Exportin-2	CSE1L	33	33	42.1	110.42	323.31	33.2619	32.9347	32.9729	33.1619	32.8081	33	32.3879	32.3383	32.1783	32.5889	32.4943	32.2619
	0.206307	-0.0661977	Q9H3S7	Tyrosine-protein phosphatase non-receptor type 23	PTPN23	17	17	16.9	178.97	30.117	27.5536	27.4629	27.2714	27.1984	27.5165	27.3745	27.8385	27.4234	27.5389	27.5898	27.3066	27.4234
	0.102927	-0.0658417	P11234	Ras-related protein Ral-B	RALB	4	2	22.3	23.408	6.6531	27.1507	27.604	27.8564	27.3239	27.6663	27.4234	27.8799	28.0084	28.0084	28.3494	28.1263	27.976
	0.174223	-0.0656033	O95239	Chromosome-associated kinesin KIF4A	KIF4A	23	14	30	139.88	87.658	29.1795	29.2467	29.6163	29.2602	29.2193	29.3662	27.9316	26.9977	28.7927	NaN	28.1115	28.7129
	0.535246	-0.0654443	O75821	Eukaryotic translation initiation factor 3 subunit G	EIF3G	16	16	56.2	35.611	115.38	30.7533	30.6285	30.5933	30.6372	30.5573	30.5844	30.8081	30.5844	30.6713	30.7047	30.1361	30.3088
	0.244053	-0.0652657	O43237	Cytoplasmic dynein 1 light intermediate chain 2	DYNC1LI2	12	11	37.2	54.099	107.4	29.2445	29.4274	29.3452	29.267	29.4354	29.1189	29.9117	29.8799	29.7833	29.4314	29.5426	29.3346
	0.321945	-0.065045	P43034	Platelet-activating factor acetylhydrolase IB subunit alpha	PAFAH1B1	17	17	52.2	46.637	323.31	30.393	30.4433	30.4629	30.4532	30.4433	30.2077	30.7927	30.8157	30.7047	30.8974	30.6964	30.6713
	0.211095	-0.0649141	O60504	Vinexin	SORBS3	4	4	8.8	75.34	16.645	26.6595	26.506	26.8142	26.4394	26.6998	26.6458	NaN	NaN	NaN	NaN	NaN	NaN
	0.739779	-0.0646756	P50991	T-complex protein 1 subunit delta	CCT4	29	29	55.5	57.924	323.31	33.7553	33.7946	33.6944	33.7353	33.6735	33.6415	32.9382	32.947	32.9505	32.9259	32.7292	32.5179
	0.409566	-0.0646458	Q7Z478	ATP-dependent RNA helicase DHX29	DHX29	7	7	6.4	155.23	26.337	26.4298	26.4723	26.5389	26.4676	26.4815	26.2979	25.767	NaN	25.9847	NaN	NaN	NaN
	0.195137	-0.0645459	P35241	Radixin	RDX	31	17	53.7	68.563	77.393	29.8188	30.099	30.0737	29.7549	30.0479	29.995	30.1115	30.1604	30.2535	30.3724	30.2979	30.1239
	0.241023	-0.064504	O94979	Protein transport protein Sec31A	SEC31A	30	30	32.7	133.01	297.36	31.0544	31.2422	31.1901	30.9188	31.1901	31.1842	31.7373	31.7927	31.781	32.2279	31.8081	31.8234
	0.040397	-0.0644321	Q9Y2G3	Probable phospholipid-transporting ATPase IF	ATP11B	17	16	23.9	134.19	305.09	28.7129	29.8519	29.7178	28.5536	29.7064	29.8294	28.6998	28.7676	28.9428	28.6865	28.7927	28.7927
	0.717519	-0.0643349	Q9HC35	Echinoderm microtubule-associated protein-like 4	EML4	31	31	41.8	108.91	187.84	31.3724	31.3033	31.2814	31.2365	31.2135	31.3142	31.4775	31.4284	31.4727	31.6154	31.5014	31.4433
	0.1742	-0.0642153	O00116	Alkyldihydroxyacetonephosphate synthase, peroxisomal	AGPS	10	10	26.4	72.911	22.689	28.2979	28.3494	28.6492	28.2077	28.391	28.5052	27.9428	28.1065	28.0813	27.965	28.0864	27.9869
	0.417325	-0.0640812	Q96CN7	Isochorismatase domain-containing protein 1	ISOC1	9	9	37.9	32.236	24.757	29.6544	29.7849	29.6663	29.537	29.6915	29.6848	29.8339	29.6458	29.5481	30.0084	29.9117	29.6697
	0.486886	-0.0638332	O95782	AP-2 complex subunit alpha-1	AP2A1	25	18	36.1	107.54	79.14	30.9609	30.8234	30.7771	30.7613	30.8004	30.8081	31.1604	31.2979	31.1901	31.3303	31.1842	31.1724
	0.101839	-0.0637862	Q969X6	Cirhin	CIRH1A	13	13	30.6	76.889	27.948	28.3745	28.1214	28.1747	28.5826	27.9372	27.9595	27.7389	27.9484	28.1263	27.6458	27.8324	27.9539
	0.164351	-0.0636527	O15260	Surfeit locus protein 4	SURF4	6	6	27.5	30.394	110.18	29.8489	29.5259	29.6964	29.4354	29.6216	29.8234	30.1239	30.5389	30.4823	30.5664	30.196	30.6372
	0.238423	-0.0631975	Q9NQ29	Putative RNA-binding protein Luc7-like 1	LUC7L	8	4	26.4	43.727	9.0282	27.9146	28.0609	28.1984	27.9539	27.9088	28.1214	NaN	NaN	27.341	NaN	NaN	NaN
	0.276084	-0.0631345	Q13045	Protein flightless-1 homolog	FLII	19	19	25.8	144.75	141.32	29.2007	29.3848	29.21	29.066	29.2445	29.2957	28.8355	28.8081	28.8682	26.4707	28.3023	28.6424
	0.137324	-0.0630112	P42766	60S ribosomal protein L35	RPL35	3	3	21.1	14.551	42.852	30.3088	29.843	30.341	29.995	30.1483	30.1604	29.4785	30.0084	30.2308	30.5754	29.9117	30.5203
	0.700243	-0.0629183	P23528	Cofilin-1	CFL1	17	13	69.3	18.502	306.96	35.2619	35.2265	35.2011	35.1262	35.2408	35.1338	35.3436	35.3763	35.3988	35.13	35.043	35.4581
	0.372815	-0.0628153	Q00610	Clathrin heavy chain 1	CLTC	88	88	61.1	191.61	323.31	35.5179	35.547	35.402	35.4702	35.4913	35.3169	35.3203	35.3796	35.2862	35.2478	35.2514	35.1753
	0.168445	-0.0626157	Q5JRA6	Melanoma inhibitory activity protein 3	MIA3	33	33	30.2	213.7	277.87	29.4314	29.141	29.1239	29.3599	29.1189	29.0296	29.3599	29.459	29.5555	29.0137	29.4649	28.8142
	0.451433	-0.0625045	Q9UPN3	Microtubule-actin cross-linking factor 1, isoforms 1/2/3/5	MACF1	128	126	25.5	838.3	323.31	32.0316	32.1392	32.1664	31.9643	32.0832	32.1021	32.0705	32.099	32.025	32.325	32.1021	31.9188
	0.498725	-0.0623792	Q9UBE0	SUMO-activating enzyme subunit 1;SUMO-activating enzyme subunit 1, N-terminally processed	SAE1	12	12	51.4	38.449	162.56	29.7597	29.8081	29.8872	29.6764	29.788	29.8035	29.3766	29.3239	29.4374	27.2535	28.7195	29.099
	0.445914	-0.0621363	Q8IWB7	WD repeat and FYVE domain-containing protein 1	WDFY1	7	7	22.7	46.323	14.49	27.5609	27.4473	27.611	27.4073	27.509	27.5165	28.2714	28.0557	28.1361	28.2123	28.4234	27.8974
	0.402492	-0.0619907	P63220	40S ribosomal protein S21	RPS21	7	7	65.1	9.1113	166.14	31.2535	31.0737	31.1901	31.1842	31.0544	31.0927	31.196	31.0927	31.1604	31.5156	31.0673	31.1783
	0.165755	-0.0618757	P62280	40S ribosomal protein S11	RPS11	11	11	51.3	18.431	43.029	32.2279	31.8042	32.2106	32.0641	31.978	32.015	31.5062	31.846	31.8385	32.7593	32.2365	32.2591
	0.35929	-0.0618057	Q99460	26S proteasome non-ATPase regulatory subunit 1	PSMD1	42	42	57.6	105.84	323.31	32.5867	32.7712	32.7109	32.5343	32.6713	32.6777	32.5156	32.5933	32.4727	32.881	32.6458	32.4871
	0.343282	-0.0618019	Q9UH62	Armadillo repeat-containing X-linked protein 3	ARMCX3	12	12	42.5	42.5	35.95	28.1015	28.3367	28.2847	28.2216	28.1507	28.1652	28.3828	28.3951	28.2353	28.8623	28.7517	28.5203
	0.0698122	-0.061793	O14933	Ubiquitin/ISG15-conjugating enzyme E2 L6	UBE2L6	5	5	56.9	17.769	41.902	29.0427	28.2625	28.7549	28.8682	28.2077	28.7988	29.0583	28.6663	28.0349	29.1239	28.2262	28.3282
	0.298006	-0.0610968	P12081	Histidine--tRNA ligase, cytoplasmic	HARS	22	16	51.7	57.41	311.33	31.5389	31.5062	31.393	31.5527	31.3879	31.3142	31.3356	31.4629	31.3515	31.5709	31.4032	31.3879
	0.148935	-0.0606747	Q15276	Rab GTPase-binding effector protein 1	RABEP1	17	17	27	99.289	70.828	27.9814	28.3745	28.249	28.1842	28.2847	27.9539	28.3745	28.5463	28.3828	28.3704	28.3494	28.0453
	0.787068	-0.0606384	Q01813	ATP-dependent 6-phosphofructokinase, platelet type	PFKP	25	22	40.3	85.595	323.31	31.1544	31.225	31.1177	31.099	31.08	31.1361	31.1842	31.0927	30.8901	31.5481	31.1483	30.846
	0.170109	-0.0606232	P61313	60S ribosomal protein L15	RPL15	9	9	42.2	24.146	17.258	32.0217	31.933	31.8719	32.0544	31.9574	31.6329	31.8755	31.7088	31.7731	30.6964	31.3568	31.7573
	0.0812226	-0.0606194	Q2TAA2	Isoamyl acetate-hydrolyzing esterase 1 homolog	IAH1	5	5	33.9	27.598	12.16	26.0219	25.9803	26.3578	25.6096	26.1661	26.4024	NaN	NaN	NaN	26.2243	26.0995	25.8694
	0.0656547	-0.060449	Q96BR5	Cytochrome c oxidase assembly factor 7	COA7	4	4	29.9	25.709	22.161	29.1065	28.3869	28.5203	29.0557	28.2714	28.5052	28.8858	28.9539	28.7549	NaN	28.9787	28.9259
	0.0840456	-0.060346	Q9H0P0	Cytosolic 5-nucleotidase 3A	NT5C3A	8	8	29.2	37.948	27.847	28.8142	29.2535	29.4649	28.805	29.17	29.3766	27.6931	27.7958	27.7771	27.8916	27.7129	27.9428
	0.359037	-0.0602887	O15371	Eukaryotic translation initiation factor 3 subunit D	EIF3D	24	24	57.3	63.972	292.39	31.3033	31.1901	31.099	31.08	31.2077	31.1239	31.0217	31.1483	30.8608	31.4532	31.1724	30.9746
	0.423446	-0.0602016	Q8IYS2	Uncharacterized protein KIAA2013	KIAA2013	7	7	18.3	69.156	74.415	27.9372	27.8385	27.9146	27.9203	27.7389	27.8504	27.7389	27.7895	27.965	27.9259	27.8445	27.7708
	0.600431	-0.0600586	P49368	T-complex protein 1 subunit gamma	CCT3	35	35	68.4	60.533	323.31	34.2828	34.2965	34.2336	34.2549	34.2478	34.13	33.3828	33.3568	33.3828	33.4458	33.2178	33.1037
	1.02076	-0.0599588	O75663	TIP41-like protein	TIPRL	9	9	44.1	31.444	18.955	29.4354	29.4093	29.3452	29.3494	29.3324	29.3282	29.3001	29.1771	29.2825	29.611	29.3971	29.0737
	0.116338	-0.0599168	P23634	Plasma membrane calcium-transporting ATPase 4	ATP2B4	26	17	27.6	137.92	323.31	29.9117	30.1604	30.0609	29.6475	30.2193	30.0864	30.7849	30.8901	30.5481	31.5978	31.1724	30.7927
	0.556037	-0.0597954	O00203	AP-3 complex subunit beta-1	AP3B1	28	28	32.9	121.32	102.39	30.1483	30.1115	30.0349	30.099	29.9814	30.0349	30.3724	30.4629	30.393	30.5844	30.2193	30.2759
	0.0720338	-0.0596886	O14683	Tumor protein p53-inducible protein 11	TP53I11	2	2	13.2	21.054	5.759	28.0084	27.3494	27.4234	27.9316	27.3992	27.2714	28.1652	28.2308	28.6697	27.6389	NaN	27.673
	0.0894546	-0.0594692	Q13895	Bystin	BYSL	15	15	44.2	49.601	30.678	28.3992	28.0505	28.0557	28.509	27.8203	27.9977	29.2714	29.158	29.1507	28.1115	28.7833	28.6595
	0.244839	-0.0593936	P78371	T-complex protein 1 subunit beta	CCT2	36	36	78.1	57.488	323.31	34.4458	34.4519	34.3101	34.4272	34.4272	34.1753	33.6944	33.7353	33.8042	33.6735	33.4581	33.3828
	0.161151	-0.059384	Q96PZ0	Pseudouridylate synthase 7 homolog	PUS7	10	10	24.4	75.035	59.516	28.1115	27.9031	27.7771	27.7958	28.066	27.7517	28.0965	27.5754	27.7453	NaN	27.7195	27.673
	0.394259	-0.0592594	Q5BKZ1	DBIRD complex subunit ZNF326	ZNF326	10	10	24.7	65.653	63.434	29.1361	29.1065	29.0813	29.17	28.9705	29.0057	27.9595	27.9977	28.4274	28.3951	27.9484	28.0711
	0.233627	-0.0590324	P07900	Heat shock protein HSP 90-alpha	HSP90AA1	57	39	65.8	84.659	323.31	37.192	37.2811	37.097	37.2102	37.2193	36.9634	36.7047	36.6116	36.7047	36.7553	36.5091	36.435
	0.108749	-0.0589752	Q9ULW0	Targeting protein for Xklp2	TPX2	17	17	28.5	85.652	272.83	29.5052	29.3724	29.2054	29.6372	29.0427	29.2262	26.8385	27.1214	28.604	NaN	NaN	NaN
	0.127678	-0.0586923	O43768	Alpha-endosulfine	ENSA	8	8	63.6	13.389	111.63	28.1115	28.0609	27.8974	28.2445	27.7064	27.9428	28.1065	27.8974	28.217	28.7064	28.2077	27.7325
	0.300842	-0.0579338	Q9Y3B2	Exosome complex component CSL4	EXOSC1	5	5	35.9	21.452	11.057	27.6181	27.4473	27.3992	27.4862	27.4551	27.3494	NaN	27.189	27.217	NaN	NaN	27.3066
	0.168	-0.0579281	Q86VS8	Protein Hook homolog 3	HOOK3	7	7	13.5	83.125	23.109	26.9977	27.2535	26.8741	26.8504	27.0505	27.0505	26.632	26.4567	26.7895	NaN	NaN	26.524
	0.406474	-0.0575854	Q6DD88	Atlastin-3	ATL3	16	16	48.4	60.541	252.41	31.1483	31.1604	31.2422	31.0737	31.0737	31.2308	30.947	31.1783	31.0864	31.325	30.933	30.7771
	0.183794	-0.0573107	Q9NU22	Midasin	MDN1	13	13	4.4	632.81	45.794	26.9203	26.6181	26.5419	26.6865	26.632	26.5898	NaN	25.9628	NaN	NaN	25.6865	NaN
	0.314039	-0.0572739	O60684	Importin subunit alpha-7	KPNA6	18	8	37.1	60.029	293.74	30.5109	30.3088	30.3088	30.3828	30.2869	30.2869	30.7533	30.6544	30.7771	30.8309	30.6798	30.5389
	0.464413	-0.0572198	Q969U7	Proteasome assembly chaperone 2	PSMG2	4	4	15.5	29.396	4.0905	27.0609	27.1015	27.189	27.0813	26.9869	27.1115	NaN	NaN	26.2838	NaN	26.1115	26.1871
	0.408021	-0.0570895	Q05397	Focal adhesion kinase 1	PTK2	19	19	27.3	119.23	105.25	29.2285	29.3153	29.2979	29.1361	29.2147	29.3196	29.8785	30.0479	29.7958	30.4234	29.94	29.9117
	0.423346	-0.0567602	P23396	40S ribosomal protein S3	RPS3	20	20	77.4	26.688	74.886	33.6198	33.4458	33.5867	33.4943	33.4581	33.5296	33.3568	33.4581	33.5412	33.8042	33.6088	33.6198
	0.138121	-0.0563939	Q16204	Coiled-coil domain-containing protein 6	CCDC6	9	9	28.1	53.29	249.96	29.0965	29.5014	29.3704	29.0839	29.3324	29.3828	28.9259	28.3367	28.7421	29.0375	28.906	28.6798
	0.0679178	-0.0563151	Q14141	Septin-6	2020-09-06	11	6	42.6	49.716	323.31	29.3088	29.7629	29.94	29.2913	29.5165	30.0349	29.2376	29.3196	29.4842	28.7802	29.158	29.027
	0.0927209	-0.05616	P08243	Asparagine synthetase [glutamine-hydrolyzing]	ASNS	24	24	50.6	64.369	123.7	31.5481	31.0084	31.3196	31.525	31.0283	31.1544	31.6285	31.3088	31.8571	30.9746	30.6881	31.4483
	0.39791	-0.0561225	Q9NTK5	Obg-like ATPase 1	OLA1	21	21	58.6	44.743	107.46	30.8234	30.6629	30.7771	30.6964	30.6372	30.7613	30.995	30.7927	30.9259	31.3463	30.8309	30.9188
	0.151135	-0.0561186	Q9Y221	60S ribosome subunit biogenesis protein NIP7 homolog	NIP7	5	5	40.6	20.462	18.941	28.509	28.0813	28.249	28.1065	28.2535	28.3109	28.267	27.6527	27.726	NaN	NaN	27.9088
	0.469177	-0.0560067	Q96RF0	Sorting nexin-18	SNX18	9	9	20.2	68.894	32.997	28.1361	28.2847	28.217	28.2123	28.141	28.1164	29.3131	29.2193	29.0427	29.1866	28.8916	29.1115
	0.44505	-0.0556971	Q5H9R7	Serine/threonine-protein phosphatase 6 regulatory subunit 3	PPP6R3	18	18	32.6	97.668	253.75	29.4881	29.6163	29.4919	29.4746	29.4194	29.5352	29.6492	29.805	29.5933	29.995	29.588	29.2759
	0.0648126	-0.0553945	Q9NWU2	Glucose-induced degradation protein 8 homolog	GID8	8	8	62.7	26.748	48.652	28.7645	28.391	28.1842	28.8682	28.0609	28.2445	28.55	28.5862	28.6931	28.3023	28.5352	NaN
	0.304594	-0.0553691	P62277	40S ribosomal protein S13	RPS13	10	10	48.3	17.222	56.288	32.1392	32.1544	32.2897	32.0283	32.2135	32.1753	32.0316	31.9188	32.2048	32.4991	31.5062	32.2619
	0.394403	-0.0546042	P16333	Cytoplasmic protein NCK1	NCK1	13	12	51.5	42.864	97.886	28.4234	28.4823	28.2891	28.3662	28.341	28.3239	28.7129	28.8385	28.8203	28.55	28.5052	28.459
	0.131482	-0.0544535	Q16658	Fascin	FSCN1	13	13	34.3	54.529	127.14	31.4334	31.2019	31.1422	31.4334	31.1724	31.0084	31.0479	30.9188	30.8004	30.9814	31.0737	30.9882
	0.192948	-0.0542094	Q96FN4	Copine-2	CPNE2	7	6	19.3	61.189	23.185	27.4862	27.1984	27.189	27.2535	27.1507	27.3066	27.6798	27.8799	27.5898	NaN	27.2979	27.4154
	0.211021	-0.0541954	O75391	Sperm-associated antigen 7	SPAG7	7	7	36.6	26.034	210.12	27.7325	27.5826	27.8445	27.7771	27.5536	27.6663	27.5609	27.6527	27.6251	27.5315	27.632	27.5754
	0.365315	-0.0541878	P17980	26S protease regulatory subunit 6A	PSMC3	22	22	65.8	49.203	290.34	32.3436	32.4702	32.3982	32.2535	32.375	32.4209	31.8004	31.9081	31.8755	32.0316	31.8081	31.7533
	0.589307	-0.0540721	P62241	40S ribosomal protein S8	RPS8	13	13	58.7	24.205	195.77	33.1346	33.0414	33.1783	33.0657	33.0753	33.0512	32.6713	32.9591	33.0365	32.4209	32.9848	33.0495
	0.18147	-0.0538896	Q13206	Probable ATP-dependent RNA helicase DDX10	DDX10	5	5	7.9	100.89	6.8513	25.6486	25.5285	25.3429	25.5812	25.341	25.4362	25.4892	NaN	NaN	NaN	NaN	25.4234
	0.144313	-0.0537326	Q676U5	Autophagy-related protein 16-1	ATG16L1	6	6	22.1	68.264	29.19	26.7771	27.1214	27.0401	27.0914	26.9088	26.7771	NaN	NaN	NaN	NaN	NaN	NaN
	0.0764645	-0.0530764	Q14254	Flotillin-2	FLOT2	15	15	41.1	47.064	87.757	29.5844	29.461	29.2007	29.5407	29.6146	28.9316	29.55	29.6612	29.6612	30.3828	30.099	30.0609
	0.339471	-0.0529874	Q96CW1	AP-2 complex subunit mu	AP2M1	11	11	30.6	49.654	34.688	30.0349	30.0864	30.0349	30.0737	30.0479	29.8755	30.2308	30.1239	30.3196	30.0737	30.1483	30.3196
	0.511717	-0.0529041	Q63HN8	E3 ubiquitin-protein ligase RNF213	RNF213	49	49	15.3	591.4	77.542	28.9088	28.8829	28.7927	28.8324	28.7517	28.8415	30.0349	30.0737	29.4862	29.2007	29.8504	29.4649
	0.084253	-0.0528679	Q9UBI6	Guanine nucleotide-binding protein G(I)/G(S)/G(O) subunit gamma-12	GNG12	6	6	70.8	8.0061	24.779	29.8799	30.1239	29.6355	29.8019	30.1361	29.5426	29.8814	29.84	29.7227	30.2422	30.0349	30.0864
	0.1118	-0.0527706	P11441	Ubiquitin-like protein 4A	UBL4A	6	6	45.9	17.776	12.656	28.5389	28.3109	28.2353	28.5969	28.141	28.189	28.4785	28.189	28.5278	28.6216	28.1937	28.3869
	0.197541	-0.0527064	Q9HAV7	GrpE protein homolog 1, mitochondrial	GRPEL1	9	9	47.5	24.279	197.03	29.2891	29.2054	29.2331	29.3828	29.0505	29.1361	29.3239	29.4629	29.4881	29.673	29.7309	29.7325
	0.31146	-0.0525513	Q9Y678	Coatomer subunit gamma-1	COPG1	33	29	59.7	97.717	323.31	31.2814	31.3463	31.3828	31.1664	31.3776	31.3088	31.5435	31.5296	31.5799	31.611	31.4823	31.2924
	0.137978	-0.0523809	L0R6Q1		SLC35A4	6	6	53.4	11.133	31.465	28.3536	28.003	28.391	28.3196	28.0914	28.1795	27.9977	28.1459	28.3704	28.5573	28.3239	28.5646
	0.0681221	-0.0523472	P02462	Collagen alpha-1(IV) chain;Arresten	COL4A1	9	9	11.4	160.61	142.33	28.4707	28.7325	28.7645	28.1015	28.8858	28.8234	28.7613	28.8564	29.2054	29.258	28.8173	29.1628
	0.188086	-0.0520166	Q6GMV3	Putative peptidyl-tRNA hydrolase PTRHD1	PTRHD1	6	6	70	15.805	29.974	29.7309	29.8785	29.843	29.747	29.6093	29.94	29.3641	28.9456	29.1937	28.391	29.0057	29.109
	0.256344	-0.0518405	P39880	Homeobox protein cut-like 1	CUX1	15	7	17	164.19	44.765	27.9259	27.8623	28.0711	27.9923	27.8142	27.8974	28.0401	27.8264	28.2759	27.5682	27.9428	27.976
	0.110045	-0.0517489	Q9UHF7	Zinc finger transcription factor Trps1	TRPS1	13	13	16.9	141.52	123.98	27.9923	27.7895	28.1604	27.9595	27.6865	28.141	27.8081	NaN	27.8142	NaN	NaN	27.4938
	0.701079	-0.0515989	P08865	40S ribosomal protein SA	RPSA	17	17	64.1	32.854	323.31	34.0184	34.0101	33.9417	33.9848	33.9153	33.9153	34.0184	33.7453	33.8138	33.4209	33.4083	33.8234
	0.119788	-0.05152	Q9HCE1	Putative helicase MOV-10	MOV10	23	23	32.7	113.67	49.129	28.4512	28.4938	28.3828	28.1214	28.6527	28.3992	28.805	28.8019	28.7129	28.3153	28.7227	28.9117
	0.187532	-0.0513751	P20020	Plasma membrane calcium-transporting ATPase 1	ATP2B1	21	12	21.9	134.68	38.42	27.9428	28.267	28.0401	27.9539	28.0965	28.0453	28.8858	28.9732	29.1189	29.5463	29.0965	29.1164
	0.0805327	-0.0511932	Q8TAT6	Nuclear protein localization protein 4 homolog	NPLOC4	20	20	45.7	68.119	108.51	30.2647	30.4727	30.8004	30.1604	30.5109	30.7129	30.2077	30.2869	30.3196	29.8415	30.1239	30.2647
	0.299454	-0.0510368	P23526	Adenosylhomocysteinase	AHCY	25	25	53.7	47.716	174.93	33.6307	33.4702	33.4943	33.5754	33.4209	33.4458	33.5412	33.3698	33.4209	33.3303	33.4458	33.3169
	1.15037	-0.0509688	O76094	Signal recognition particle subunit SRP72	SRP72	23	23	47.5	74.605	323.31	31.2979	31.2703	31.2479	31.2193	31.196	31.2479	31.1483	31.08	31.2193	30.9677	30.9814	30.995
	0.0786506	-0.0509135	O96005	Cleft lip and palate transmembrane protein 1	CLPTM1	12	12	26.8	76.096	142.53	29.9677	29.8872	30.3724	29.7692	29.9539	30.3515	29.8294	30.2193	30.099	30.1483	29.7942	29.8858
	0.124429	-0.0506198	P57088	Transmembrane protein 33	TMEM33	7	7	27.9	27.978	28.813	28.9923	28.6492	29.0243	28.7581	28.7421	29.0137	28.8234	29.0686	29.3578	28.6764	29.0003	29.1164
	0.257805	-0.0505536	Q9BRX2	Protein pelota homolog	PELO	9	9	28.8	43.359	26.716	28.4032	28.4473	28.6458	28.4862	28.4073	28.4512	28.1604	28.1795	28.1604	NaN	27.2535	27.632
	0.147644	-0.0504328	P46108	Adapter molecule crk	CRK	11	11	51.3	33.83	95.126	29.6355	29.8829	29.9259	29.5862	29.843	29.8638	29.7988	29.8264	29.8264	30.0737	29.7502	29.6998
	0.140064	-0.0503222	P11047	Laminin subunit gamma-1	LAMC1	51	50	48.4	177.6	323.31	32.4532	32.5732	32.333	32.4058	32.5978	32.2048	31.9574	31.933	31.9574	32.0737	31.8081	31.5343
	0.15478	-0.0503025	O75718	Cartilage-associated protein	CRTAP	17	17	50.6	46.561	47.081	31.3356	31.2703	31.1115	31.1842	31.3672	31.015	31.5481	31.5527	31.3672	31.6501	31.6586	31.4483
	0.247468	-0.0502733	P18084	Integrin beta-5	ITGB5	15	15	33	88.053	269.89	29.2467	29.2602	29.2512	29.0609	29.3388	29.2077	29.4274	29.673	29.7064	29.3848	29.4492	29.4804
	0.0919896	-0.0501753	Q99614	Tetratricopeptide repeat protein 1	TTC1	15	15	65.8	33.526	204.99	30.7771	30.7927	30.6022	30.9045	30.8081	30.3088	31.1115	31.0349	31.0737	31.0349	30.7047	30.5754
	0.297693	-0.0501442	Q9P289	Serine/threonine-protein kinase 26	STK26	10	6	34.1	46.528	18.522	27.8385	27.7453	27.6181	27.6595	27.7325	27.6595	27.1604	27.4394	26.8858	NaN	NaN	27.1214
	0.0698503	-0.0501245	Q96C90	Protein phosphatase 1 regulatory subunit 14B	PPP1R14B	5	5	57.8	15.911	184.3	29.8504	29.7613	29.2331	29.8799	29.4629	29.3515	29.1676	28.673	29.9677	29.6764	27.7958	28.673
	0.304419	-0.0500418	P61421	V-type proton ATPase subunit d 1	ATP6V0D1	10	10	39.9	40.329	46.933	29.4274	29.4214	29.3971	29.2331	29.4234	29.4394	30.2759	30.362	30.1115	30.5014	30.4234	30.1483
	0.0705048	-0.0499859	Q16222	UDP-N-acetylhexosamine pyrophosphorylase;UDP-N-acetylgalactosamine pyrophosphorylase;UDP-N-acetylglucosamine pyrophosphorylase	UAP1	16	15	38.9	58.768	208.08	30.1604	29.7973	29.8755	30.3088	29.8264	29.5481	30.8608	30.8755	30.362	29.7676	30.0217	30.0217
	0.0396664	-0.0499109	O43847	Nardilysin	NRD1	19	19	16.7	131.7	27.312	28.632	28.7064	27.4234	28.3367	28.0084	28.267	29.1532	28.6898	28.9567	28.5646	27.8682	27.3578
	0.252542	-0.0497761	Q9H444	Charged multivesicular body protein 4b	CHMP4B	7	7	47.3	24.95	38.695	29.5844	29.4413	29.4532	29.4727	29.5352	29.3217	29.6022	29.5481	29.509	NaN	29.3745	29.4113
	0.698837	-0.0496635	O43765	Small glutamine-rich tetratricopeptide repeat-containing protein alpha	SGTA	11	11	35.5	34.063	246.8	30.2308	30.2979	30.2077	30.1842	30.2308	30.1724	30.5109	30.6022	30.3303	30.3196	30.3303	30.3196
	0.160609	-0.0492306	P63000	Ras-related C3 botulinum toxin substrate 1	RAC1	9	3	50	21.45	22.43	31.5343	31.8385	31.6964	31.5754	31.7888	31.5573	31.7533	31.8937	31.8385	32.025	31.8157	31.8157
	0.153028	-0.0492121	P35579	Myosin-9	MYH9	113	95	55.3	226.53	323.31	34.5527	34.6995	34.8186	34.4642	34.6839	34.7751	34.5296	34.6253	34.7047	34.9806	34.7302	34.8422
	0.0598618	-0.0489661	O15116	U6 snRNA-associated Sm-like protein LSm1	LSM1	4	4	30.1	15.179	3.1149	26.4984	26.0041	26.4984	25.989	26.1258	26.7392	26.7771	NaN	NaN	26.4815	26.5898	NaN
	0.193366	-0.0489305	O95639	Cleavage and polyadenylation specificity factor subunit 4	CPSF4	6	6	34.9	30.255	25.588	27.0084	27.0505	27.0505	27.1795	26.8858	26.8974	26.9869	27.217	27.1115	27.4314	27.3494	27.1312
	0.0625734	-0.0489038	Q5TZA2	Rootletin	CROCC	7	7	5.3	228.52	50.492	29.4881	28.8173	29.003	29.4113	28.9484	28.8019	NaN	28.3704	NaN	NaN	NaN	NaN
	0.197456	-0.0488764	Q99832	T-complex protein 1 subunit eta	CCT7	34	34	68	59.366	323.31	33.6415	33.6198	33.4083	33.5978	33.5296	33.3956	32.8023	32.8347	32.779	32.5933	32.6586	32.4751
	0.0520245	-0.0488726	Q15418	Ribosomal protein S6 kinase alpha-1	RPS6KA1	14	8	33.2	82.722	49.33	28.1937	27.6251	27.7195	28.3324	27.4551	27.604	27.6389	27.3066	27.019	27.4394	NaN	27.2535
	0.277987	-0.0487417	Q9Y4L1	Hypoxia up-regulated protein 1	HYOU1	45	44	54.9	111.33	323.31	32.9729	32.9347	32.8608	32.8719	32.9831	32.7672	32.94	32.9224	32.9882	33.1223	32.8441	32.9295
	0.104358	-0.0485789	Q99496	E3 ubiquitin-protein ligase RING2	RNF2	5	3	22.9	37.655	22.361	27.0813	27.2262	27.1795	27.2714	26.7895	27.2803	26.7389	26.7129	27.0505	26.9088	27.141	26.9088
	0.257724	-0.0485554	Q15369	Transcription elongation factor B polypeptide 1	TCEB1	7	7	84.8	12.473	77.102	30.7849	30.8081	30.7771	30.6713	30.8901	30.6629	31.015	31.0673	31.0017	31.3088	30.9746	30.9882
	0.13691	-0.0484498	O14964	Hepatocyte growth factor-regulated tyrosine kinase substrate	HGS	12	12	23.6	86.191	31.098	27.8385	27.976	27.7708	27.5826	27.9484	27.9088	27.3324	27.189	27.509	27.7708	27.7129	27.6181
	0.27539	-0.0483939	P43487	Ran-specific GTPase-activating protein	RANBP1	8	8	59.7	23.31	91.198	31.9574	31.7849	31.7333	31.8157	31.7533	31.7613	31.9712	31.9224	31.8571	32.0283	31.947	31.7573
	0.170791	-0.0476742	Q13363	C-terminal-binding protein 1	CTBP1	11	7	26.1	47.535	226.59	28.8945	29.1913	29.0505	28.877	29.0375	29.0788	30.0084	29.94	29.8901	29.9259	30.1842	30.1239
	0.308068	-0.0475648	Q9Y6G9	Cytoplasmic dynein 1 light intermediate chain 1	DYNC1LI1	18	17	49.3	56.578	105.09	30.4727	30.4629	30.5296	30.5573	30.362	30.4032	30.6285	30.6713	30.7373	30.1604	30.0737	30.2759
	0.180114	-0.0474841	O00487	26S proteasome non-ATPase regulatory subunit 14	PSMD14	9	9	44.2	34.577	55.227	30.4134	30.099	30.3196	30.2422	30.1604	30.2869	30.6629	30.4727	30.362	30.4433	30.4823	30.4334
	0.330658	-0.0473824	Q00535	Cyclin-dependent-like kinase 5	CDK5	11	10	48.6	33.304	40.935	28.9977	29.0505	29.1676	29.0864	28.9977	28.9896	28.7676	28.3153	28.9316	28.5826	28.7613	28.9146
	0.0536781	-0.0473372	P34059	N-acetylgalactosamine-6-sulfatase	GALNS	6	6	20.3	58.025	18.819	27.509	27.0084	26.6595	27.2979	27.0505	26.6865	27.5969	27.4234	27.3828	27.7517	27.6663	27.7581
	0.098224	-0.0473188	Q15910	Histone-lysine N-methyltransferase EZH2	EZH2	4	4	10.3	85.362	15.151	26.3049	25.7389	25.8671	25.9383	25.9495	25.8811	NaN	NaN	NaN	NaN	25.7441	NaN
	0.480005	-0.0472069	P26639	Threonine--tRNA ligase, cytoplasmic	TARS	42	42	58	83.434	314.07	33.5867	33.5641	33.5412	33.5978	33.4702	33.4823	33.6415	33.6415	33.4943	33.3436	33.4702	33.2759
	0.110512	-0.0470893	Q9Y6D6	Brefeldin A-inhibited guanine nucleotide-exchange protein 1	ARFGEF1	19	11	15.2	208.76	104.42	27.1604	27.1507	27.0084	27.341	26.8504	26.9869	28.7802	28.8385	28.2625	26.4202	28.8324	28.3869
	0.185243	-0.0470441	P06748	Nucleophosmin	NPM1	10	10	54.4	32.575	323.31	34.547	34.5296	34.3763	34.5527	34.4763	34.2828	34.0673	34.0512	34.1223	34.1753	33.933	34.1453
	0.270291	-0.0469844	Q9UHJ6	Sedoheptulokinase	SHPK	11	11	36.4	51.49	95.386	29.57	29.4433	29.5426	29.5259	29.3557	29.5333	30.1842	30.2193	30.2077	30.5203	30.362	30.1842
	0.184749	-0.046978	Q9P2I0	Cleavage and polyadenylation specificity factor subunit 2	CPSF2	14	14	29.8	88.486	31.256	28.2399	28.2714	28.4512	28.1361	28.3109	28.3745	28.0557	28.1214	28.0243	28.203	28.0453	27.9259
	0.050104	-0.0469462	Q9C0E2	Exportin-4	XPO4	14	14	20	130.14	101.57	26.4923	26.3679	26.5255	26.533	25.8145	26.8974	27.726	27.4234	27.673	28.0296	28.1459	27.7195
	0.221471	-0.0466359	Q9UMS4	Pre-mRNA-processing factor 19	PRPF19	17	17	56.3	55.18	212.41	32.6819	32.5435	32.7453	32.5596	32.5481	32.7231	32.0641	32.0084	31.8309	32.1604	32.2279	32.0414
	0.138048	-0.0465749	O75044	SLIT-ROBO Rho GTPase-activating protein 2	SRGAP2	10	9	16.9	120.87	22.941	27.611	27.4234	27.4073	27.6458	27.341	27.3153	NaN	NaN	NaN	NaN	NaN	NaN
	0.201588	-0.0456982	P60953	Cell division control protein 42 homolog	CDC42	8	7	57.1	21.258	50.066	30.5296	30.8004	30.6285	30.5844	30.6798	30.5573	30.7927	30.7849	30.8004	31.1115	30.9045	30.7373
	0.0467107	-0.0452557	P36404	ADP-ribosylation factor-like protein 2	ARL2	8	8	44.6	20.878	13.944	27.9484	27.4154	28.2353	27.8799	27.3992	28.1842	27.0084	NaN	27.5389	NaN	26.965	NaN
	0.16657	-0.0449829	Q13217	DnaJ homolog subfamily C member 3	DNAJC3	13	13	39.9	57.579	104.58	28.7064	28.362	28.4785	28.4629	28.4938	28.4551	29.249	29.0864	29.2331	29.341	29.4512	29.4032
	0.417923	-0.0448793	P41250	Glycine--tRNA ligase	GARS	22	22	42.8	83.165	186.3	31.3356	31.3879	31.4532	31.2924	31.3515	31.3982	31.196	31.1664	30.947	31.2365	31.015	30.7373
	0.207926	-0.0448278	P24534	Elongation factor 1-beta	EEF1B2	10	9	63.6	24.763	147.83	32.6	32.7353	32.6	32.4823	32.7252	32.5933	33.1392	33.2619	33.2478	33.4823	33.3169	33.0479
	0.111644	-0.0447108	P17812	CTP synthase 1	CTPS1	29	27	67	66.69	311.31	32.8516	32.5319	32.5179	32.7771	32.5273	32.463	33.1483	32.9347	33.0592	32.7907	32.5933	32.8004
	0.907988	-0.0440286	Q15008	26S proteasome non-ATPase regulatory subunit 6	PSMD6	22	22	62.5	45.531	163.94	31.2535	31.2703	31.2077	31.1901	31.225	31.1842	31.3672	31.3879	31.2703	31.7652	31.393	31.2591
	0.0863811	-0.0438258	Q9NVJ2	ADP-ribosylation factor-like protein 8B	ARL8B	6	4	28.5	21.539	5.7217	27.9031	27.8799	27.5165	27.5898	27.9814	27.5969	28.0505	28.2759	27.9539	NaN	28.3023	28.3992
	0.107469	-0.0437546	P49589	Cysteine--tRNA ligase, cytoplasmic	CARS	20	20	32.6	85.472	94.931	28.5052	28.1747	28.1115	28.3452	28.066	28.249	29.249	29.1361	29.1913	28.611	29.027	29.0965
	0.141034	-0.0437018	O60925	Prefoldin subunit 1	PFDN1	4	4	31.1	14.21	46.609	28.7325	28.6216	28.7096	28.8564	28.49	28.5862	28.0965	28.2308	27.9146	28.1842	27.9923	27.8623
	0.426548	-0.0433502	P61160	Actin-related protein 2	ACTR2	16	16	54.6	44.76	149.4	31.2647	31.3724	31.4083	31.2979	31.3033	31.3142	32.4234	32.3542	32.4775	32.3356	32.4507	32.3905
	0.045594	-0.0432434	Q5U5X0	Complex III assembly factor LYRM7	LYRM7	4	4	40.4	11.955	16.403	27.5682	27.1115	26.976	27.6931	27.0505	26.7823	26.726	27.17	27.2803	NaN	27.2979	27.4234
	0.136279	-0.0432116	Q96K17	Transcription factor BTF3 homolog 4	BTF3L4	6	6	55.7	17.27	67.372	30.6022	30.4727	30.393	30.6458	30.3515	30.341	31.0673	31.0414	31.0479	30.9539	31.0479	31.0217
	0.597851	-0.0427945	Q9UNM6	26S proteasome non-ATPase regulatory subunit 13	PSMD13	22	22	59	42.945	244.94	31.2647	31.1664	31.1901	31.1842	31.1664	31.1422	31.4775	31.5799	31.4433	31.5709	31.5203	31.2869
	0.114856	-0.0421581	Q04446	1,4-alpha-glucan-branching enzyme	GBE1	9	9	21.9	80.473	18.882	27.8445	27.3828	27.611	27.5754	27.5682	27.5682	28.2759	28.249	27.8974	NaN	27.9977	27.8564
	0.238861	-0.0420717	P60510	Serine/threonine-protein phosphatase 4 catalytic subunit	PPP4C	11	9	46.3	35.08	32.93	28.6629	28.8916	28.8234	28.726	28.7771	28.7486	28.3536	28.7096	28.3066	28.4113	28.391	28.4473
	0.0932649	-0.0419801	Q9HB90;Q9NQL2	Ras-related GTP-binding protein C;Ras-related GTP-binding protein D	RRAGC;RRAGD	9	9	27.8	44.223	22.883	27.8974	27.9705	27.5463	27.7895	27.9088	27.5898	28.141	28.5682	28.2308	28.6561	28.524	28.3282
	0.0731964	-0.0419598	Q6P1N9	Putative deoxyribonuclease TATDN1	TATDN1	7	7	30	33.601	12.093	27.5898	27.9595	27.9539	27.524	28.0762	27.7771	27.2077	NaN	NaN	NaN	NaN	NaN
	0.041931	-0.0413812	P29966	Myristoylated alanine-rich C-kinase substrate	MARCKS	14	14	48.5	31.554	323.31	32.0283	32.6902	32.4967	31.8196	32.6692	32.6022	31.1115	31.2019	31.5156	32.0737	31.2647	31.1724
	0.124083	-0.0413094	Q9BT25	HAUS augmin-like complex subunit 8	HAUS8	4	4	16.3	44.857	37.697	26.2317	26.4073	26.632	26.3135	26.391	26.4425	NaN	NaN	25.9716	NaN	NaN	NaN
	0.190609	-0.0412045	O00743	Serine/threonine-protein phosphatase 6 catalytic subunit;Serine/threonine-protein phosphatase 6 catalytic subunit, N-terminally processed	PPP6C	8	8	37.4	35.144	37.928	29.4113	29.3153	29.1652	29.1747	29.3109	29.2825	29.6441	29.4374	29.341	27.8916	28.9316	29.1312
	0.151889	-0.0411873	P49792	E3 SUMO-protein ligase RanBP2	RANBP2	53	34	27.4	358.2	323.31	30.2077	30.2422	30.1239	30.3303	30.1115	30.0084	30.5389	30.4532	30.6713	30.7129	30.5296	30.611
	0.066406	-0.0411072	Q14160	Protein scribble homolog	SCRIB	16	14	18	174.88	53.894	27.3066	27.3828	26.7771	26.9203	27.1604	27.2625	27.4785	27.2891	27.632	27.217	27.726	27.2077
	0.785951	-0.0410487	P62979;P62987;P0CG47;P0CG48	Ubiquitin-40S ribosomal protein S27a;Ubiquitin;40S ribosomal protein S27a;Ubiquitin-60S ribosomal protein L40;Ubiquitin;60S ribosomal protein L40;Polyubiquitin-B;Ubiquitin;Polyubiquitin-C;Ubiquitin	RPS27A;UBA52;UBB;UBC	11	11	56.4	17.965	279.81	33.8042	33.87	33.8516	33.8234	33.7751	33.8042	33.7453	33.9153	33.6944	34.8138	33.9505	33.8234
	0.0804765	-0.0409851	O75915	PRA1 family protein 3	ARL6IP5	4	4	21.3	21.614	11.777	26.965	26.8858	27.0505	26.604	26.976	27.1984	26.4754	26.8974	26.6865	27.2535	26.8623	26.6865
	0.0825944	-0.0405521	P11233	Ras-related protein Ral-A	RALA	5	3	23.8	23.567	44.346	29.4957	29.8489	29.5222	29.4053	29.8385	29.5014	28.391	28.611	29.0217	29.0583	29.0084	29.0401
	0.179063	-0.040432	Q9UHP3	Ubiquitin carboxyl-terminal hydrolase 25	USP25	12	12	16.9	122.22	79.201	26.8385	26.8974	26.8623	26.6595	26.8858	26.9316	26.2463	26.604	26.6595	NaN	NaN	NaN
	0.0465918	-0.0403996	P56192	Methionine--tRNA ligase, cytoplasmic	MARS	32	32	44.3	101.11	323.31	31.5844	31.1544	30.8309	31.5389	31.0414	30.8682	32.0544	32.0479	31.8534	32.1422	31.9117	31.7965
	0.567525	-0.0402991	P21283	V-type proton ATPase subunit C 1	ATP6V1C1	9	8	28.5	43.941	106.3	28.2979	28.3109	28.3787	28.2935	28.2535	28.3196	28.8653	28.9732	28.7162	28.6181	28.7802	28.524
	0.583581	-0.0401484	P30050	60S ribosomal protein L12	RPL12	8	8	58.8	17.818	185.35	32.8974	32.8176	32.8309	32.8403	32.8081	32.7771	33.1346	33.1709	32.9591	33.2336	33.2193	33.1453
	0.0920525	-0.0400658	P26885	Peptidyl-prolyl cis-trans isomerase FKBP2	FKBP2	7	7	53.5	15.649	22.984	29.326	29.3088	28.9732	28.9539	29.2625	29.2714	29.8726	29.8726	29.6981	30.099	29.7146	29.6881
	0.0645365	-0.040053	Q9H3R5	Centromere protein H	CENPH	4	4	26.3	28.481	29.32	26.5029	26.3695	26.1757	26.673	26.2445	26.0105	NaN	NaN	26.5075	NaN	NaN	26.1055
	0.312412	-0.0396665	O15144	Actin-related protein 2/3 complex subunit 2	ARPC2	22	22	76.3	34.333	64.527	30.3196	30.3828	30.4919	30.3515	30.341	30.3828	31.5109	31.5014	31.4433	31.6372	31.4284	31.5573
	0.0964343	-0.0396601	Q9P0J7	E3 ubiquitin-protein ligase KCMF1	KCMF1	7	7	33.9	41.945	27.037	26.5595	26.632	26.8142	26.6458	26.8385	26.4024	26.4536	NaN	26.8858	NaN	NaN	NaN
	0.0739665	-0.0394274	Q9BYV8	Centrosomal protein of 41 kDa	CEP41	6	6	28.2	41.368	74.342	27.0401	26.521	26.574	26.632	26.5433	26.8415	NaN	NaN	NaN	NaN	NaN	NaN
	0.103582	-0.0393378	Q9NVI7	ATPase family AAA domain-containing protein 3A	ATAD3A	17	9	31.4	71.368	133.89	29.6075	29.5444	29.3828	29.708	29.3848	29.3239	28.9787	29.1771	29.3724	29.6424	29.5664	29.5826
	0.075208	-0.0390466	Q99797	Mitochondrial intermediate peptidase	MIPEP	10	10	22.9	80.64	34.697	27.2979	27.3066	27.7833	27.2625	27.4473	27.5609	27.9203	28.0557	28.1361	28.5754	28.3196	28.1312
	0.0957432	-0.0390148	Q9BR76	Coronin-1B	CORO1B	19	19	46.6	54.234	105.82	32.1813	32.0316	31.8571	32.1052	32.0864	31.7613	31.7927	31.7692	31.5343	31.2135	31.4919	31.3982
	0.128188	-0.0390091	Q9Y490	Talin-1	TLN1	94	86	54.7	269.76	323.31	33.0463	33.2619	33.1813	32.9574	33.2759	33.1392	32.7292	32.7573	32.881	33.0576	32.8366	32.966
	0.258304	-0.038873	P53618	Coatomer subunit beta	COPB1	38	38	49.4	107.14	310.84	32.2365	32.2365	32.1664	32.0641	32.225	32.2336	32.5618	32.5596	32.6285	32.8883	32.686	32.5203
	0.109042	-0.0388368	P49750	YLP motif-containing protein 1	YLPM1	11	11	9.6	241.64	17.235	27.611	27.4938	27.8385	27.5014	27.7645	27.5609	27.0609	NaN	26.8974	NaN	NaN	26.7895
	0.109713	-0.0387408	Q9Y5M8	Signal recognition particle receptor subunit beta	SRPRB	12	12	51.7	29.702	50.379	29.8474	29.4413	29.6747	29.5444	29.7113	29.5916	29.2285	29.5407	29.4032	29.6948	29.6337	29.5481
	0.166632	-0.0385176	P22059	Oxysterol-binding protein 1	OSBP	20	18	43.6	89.42	129	29.8974	29.9117	29.6663	29.846	29.7911	29.7227	30.0217	29.8872	29.8504	30.0737	30.0479	29.55
	0.249081	-0.0384725	P19387	DNA-directed RNA polymerase II subunit RPB3	POLR2C	8	8	42.5	31.441	31.579	28.1652	28.3153	28.1984	28.189	28.1164	28.258	27.8385	NaN	27.4473	27.8019	27.8564	28.0813
	0.0883394	-0.0384356	P05198	Eukaryotic translation initiation factor 2 subunit 1	EIF2S1	22	22	68.3	36.112	161.79	31.6501	31.4871	31.2647	31.5978	31.4581	31.2308	31.2019	31.4134	31.3356	31.6372	31.5203	31.3303
	0.144442	-0.0383027	P49721	Proteasome subunit beta type-2	PSMB2	12	12	66.2	22.836	29.505	29.9539	30.1604	30.2422	30.0084	30.0609	30.1724	30.3196	30.196	30.1239	30.7129	30.3303	30.1239
	0.0459781	-0.0381254	P38432	Coilin	COIL	12	12	26.4	62.608	39.649	28.5315	27.8858	27.9484	28.1115	27.7325	28.4073	26.604	26.976	26.9977	26.9977	26.4008	27.0401
	0.0478141	-0.0381095	Q9BX66	Sorbin and SH3 domain-containing protein 1	SORBS1	12	12	13.9	142.51	64.096	29.3515	29.3109	29.0296	29.6948	29.003	28.8799	28.6181	28.6663	28.6458	29.3662	28.8945	28.7676
	0.0693269	-0.0380491	P51532	Transcription activator BRG1	SMARCA4	19	19	16.4	184.64	147.77	29.708	29.2193	29.6407	29.673	29.2736	29.5071	29.0427	29.3557	29.2007	29.099	29.4134	29.4571
	0.0930301	-0.0378838	P60709	Actin, cytoplasmic 1;Actin, cytoplasmic 1, N-terminally processed	ACTB	29	2	86.4	41.736	323.31	38.2897	38.6354	38.5303	38.2461	38.5874	38.5084	38.365	38.3812	38.5556	38.7015	38.5627	38.4973
	0.178531	-0.0377712	P62306	Small nuclear ribonucleoprotein F	SNRPF	4	4	48.8	9.7251	38.725	29.7613	29.5591	29.7162	29.6948	29.6915	29.537	29.5109	29.2913	29.4804	29.5969	29.5052	29.5222
	0.0692898	-0.0377706	P29590	Protein PML	PML	17	17	30.8	97.55	69.076	29.708	30.1724	30.0349	29.7178	30.1724	29.9117	28.4512	28.3992	28.4032	27.2353	28.8974	28.5165
	0.0875008	-0.0375532	Q13586	Stromal interaction molecule 1	STIM1	10	9	20.3	77.422	95.765	27.4862	27.0914	27.0296	27.1507	27.2625	27.0813	28.2979	28.55	28.3324	28.6931	28.5682	28.2935
	0.0976401	-0.0373618	P15848	Arylsulfatase B	ARSB	6	6	15.9	59.687	12.787	28.2077	28.4234	28.4113	28.0864	28.4862	28.3578	28.5426	28.6998	28.4785	28.9456	29.0479	28.7895
	0.0915727	-0.0372136	Q10570	Cleavage and polyadenylation specificity factor subunit 1	CPSF1	20	20	20.3	160.88	58.565	29.027	28.6798	28.9787	29.0217	28.6898	28.8623	28.4274	28.5609	28.7096	26.5075	28.3324	28.6458
	0.164125	-0.0371545	P62910	60S ribosomal protein L32	RPL32	5	5	34.1	15.86	17.435	31.6501	31.5389	31.6501	31.5978	31.6964	31.4334	31.4532	31.611	31.5573	31.6329	31.6022	31.7006
	0.204806	-0.0367724	Q15459	Splicing factor 3A subunit 1	SF3A1	23	23	35.4	88.885	282.45	31.2535	31.1052	31.2703	31.2591	31.1052	31.1544	30.8829	30.8309	30.9746	30.9188	30.8974	30.995
	0.197236	-0.0365149	Q9H3P7	Golgi resident protein GCP60	ACBD3	17	17	56.6	60.593	277.17	30.4727	30.6629	30.6713	30.5754	30.611	30.5109	30.5389	30.4532	30.5296	30.6881	30.5933	30.3724
	0.0577898	-0.0362523	Q5VW36	Focadhesin	FOCAD	12	12	11	200.07	41.595	27.3745	27.3066	26.6998	27.1015	27.141	27.0296	27.8799	27.7195	27.8203	27.17	27.604	27.4473
	0.124051	-0.0361474	Q9BXV9	Uncharacterized protein C14orf142	C14orf142	3	3	67	10.859	61.946	27.5389	27.8324	27.632	27.6181	27.7453	27.5315	27.3066	27.1984	27.1115	27.6527	27.2891	26.9539
	0.0442485	-0.0360998	Q9NX58	Cell growth-regulating nucleolar protein	LYAR	9	9	30.9	43.614	16.292	27.2714	26.8858	27.6998	27.0711	27.1312	27.5463	NaN	NaN	NaN	NaN	27.1507	27.4785
	0.20963	-0.0359262	Q2NL82	Pre-rRNA-processing protein TSR1 homolog	TSR1	15	15	29.6	91.809	79.46	29.6898	29.5184	29.6128	29.6005	29.4842	29.6285	29.6458	29.4746	29.6612	29.1263	29.4842	29.5071
	0.103783	-0.0353864	Q96JJ3	Engulfment and cell motility protein 2	ELMO2	6	6	13.6	82.614	64.485	26.965	27.1312	26.7129	26.9316	26.8974	26.8741	27.019	27.2979	26.9869	27.524	27.2803	26.9088
	0.088505	-0.0352872	P21964	Catechol O-methyltransferase	COMT	8	8	44.6	30.037	24.584	28.0349	27.7771	27.9203	27.7581	28.1164	27.7517	27.2353	27.7771	27.6458	NaN	27.4473	27.8324
	0.135865	-0.0352046	P40227	T-complex protein 1 subunit zeta	CCT6A	27	22	71	58.024	229.32	33.6307	33.7252	33.5412	33.6307	33.715	33.4458	32.7907	32.686	32.846	32.8309	32.5911	32.6
	0.159017	-0.0349204	P62244	40S ribosomal protein S15a	RPS15A	10	10	73.8	14.839	36.672	31.8385	31.6415	31.8608	31.8234	31.6713	31.7413	31.6329	31.6329	31.7573	31.9574	31.7453	31.6839
	0.181301	-0.034893	Q99536	Synaptic vesicle membrane protein VAT-1 homolog	VAT1	14	14	51.4	41.92	86.581	30.4919	30.4433	30.2647	30.4032	30.3724	30.3196	29.4707	29.4473	29.8755	29.7958	29.6441	29.9117
	0.099285	-0.0347729	Q96N67	Dedicator of cytokinesis protein 7	DOCK7	29	27	20.2	242.56	72.492	28.9732	28.9977	28.6458	28.9117	28.8682	28.7325	29.3494	29.391	29.4032	29.2262	29.258	29.267
	0.130158	-0.0347691	Q96J01	THO complex subunit 3	THOC3	10	10	48.4	38.771	30.588	29.0914	29.0003	28.7645	28.9344	28.9231	28.8945	28.4032	28.1459	28.249	28.17	28.3282	28.203
	0.0741129	-0.0345249	P49006	MARCKS-related protein	MARCKSL1	6	6	69.2	19.529	246.58	30.3088	30.4919	29.995	30.341	30.2647	30.0864	31.015	31.0017	31.0479	31.4433	31.1544	30.8157
	0.217047	-0.0344416	Q14204	Cytoplasmic dynein 1 heavy chain 1	DYNC1H1	209	209	54.9	532.4	323.31	34.6088	34.6629	34.5412	34.4883	34.5584	34.6629	35.1029	35.1604	34.9197	35.0592	34.9677	34.8608
	0.142034	-0.034441	Q9NX24	H/ACA ribonucleoprotein complex subunit 2	NHP2	6	6	68.6	17.201	43.038	28.9977	28.906	28.8112	28.9977	28.7486	28.8653	28.8945	28.8564	28.9002	28.7517	28.9031	29.109
	0.270999	-0.0338313	P53621	Coatomer subunit alpha;Xenin;Proxenin	COPA	55	55	57.7	138.34	323.31	33.0167	32.995	32.9574	32.9045	33.0495	32.9135	33.2897	33.2759	33.2619	33.0832	33.1006	33.2062
	0.0689168	-0.0336666	Q9UBQ0	Vacuolar protein sorting-associated protein 29	VPS29	5	5	39	20.505	12.938	30.4532	30.099	30.0609	30.4032	30.0479	30.0609	30.2979	29.9117	30.1361	30.4134	29.94	30.3724
	0.132266	-0.0335948	Q14320	Protein FAM50A	FAM50A	9	9	31	40.241	20.056	29.249	29.4785	29.4413	29.4492	29.3766	29.2422	28.6146	28.6663	28.3324	NaN	28.5352	28.611
	0.114633	-0.0332998	P63208	S-phase kinase-associated protein 1	SKP1	10	10	69.9	18.658	57.631	31.1361	31.2365	31.0217	31.2422	31.1052	30.947	31.015	31.0283	31.0283	31.5435	31.1115	30.8901
	0.161519	-0.0331643	Q96HY6	DDRGK domain-containing protein 1	DDRGK1	5	5	31.2	35.61	69.326	27.5969	27.4551	27.5969	27.3992	27.604	27.5463	NaN	NaN	27.019	NaN	NaN	27.3494
	0.0605415	-0.0330715	Q9BQA1	Methylosome protein 50	WDR77	6	6	32.7	36.724	39.152	27.7064	27.3992	27.5463	27.7645	27.5898	27.1984	27.2077	27.2891	27.2625	NaN	27.3153	26.9539
	0.135788	-0.0330448	P49591	Serine--tRNA ligase, cytoplasmic	SARS	22	22	48.4	58.777	211.12	31.8571	32.1084	32.0705	31.8937	32.0414	32.0017	31.7573	31.8157	31.7731	31.8119	31.7129	31.7088
	0.220879	-0.0321617	Q7L5N1	COP9 signalosome complex subunit 6	COPS6	12	12	54.1	36.163	58.074	30.7373	30.7373	30.846	30.7771	30.6544	30.7927	30.8608	30.8974	30.9117	30.7129	30.8157	30.9539
	0.0492223	-0.0321121	Q9UHD9	Ubiquilin-2	UBQLN2	12	9	32.5	65.695	125.56	28.5315	28.4073	27.8504	28.3869	28.1747	28.1312	28.7613	28.3324	28.7645	28.5646	28.5014	28.2803
	0.150316	-0.0320841	Q9UNF1	Melanoma-associated antigen D2	MAGED2	27	26	48.7	64.953	323.31	32.0381	32.2106	32.2647	32.0576	32.1753	32.1842	31.8081	31.9224	31.8422	31.6544	31.4134	31.362
	0.060807	-0.0319138	P09132	Signal recognition particle 19 kDa protein	SRP19	6	6	59.7	16.156	19.709	27.5826	27.9977	27.8974	27.5609	27.8019	28.019	NaN	27.6458	27.7325	NaN	28.0609	27.632
	0.0306851	-0.0318152	P49902	Cytosolic purine 5-nucleotidase	NT5C2	14	14	45.6	64.969	36.764	29.5296	30.2308	30.2193	29.4532	30.1115	30.3196	28.7517	28.5609	28.8142	27.5165	28.3066	28.4862
	0.123885	-0.0314032	O75165	DnaJ homolog subfamily C member 13	DNAJC13	17	17	11	254.41	66.442	27.7129	27.5754	27.4938	27.4473	27.5609	27.6798	27.9705	28.0084	27.7389	28.4194	27.9484	27.611
	0.0780537	-0.0311845	Q6IBS0	Twinfilin-2	TWF2	9	8	40.1	39.548	45.49	28.2216	28.2979	28.3787	28.019	28.4746	28.3109	28.003	28.0864	28.1065	27.9428	27.8682	28.0864
	0.276628	-0.0311089	P12236	ADP/ATP translocase 3;ADP/ATP translocase 3, N-terminally processed	SLC25A6	17	4	55.4	32.866	161	33.2478	33.2336	33.2759	33.2897	33.1407	33.2336	33.2619	33.3033	33.2897	33.1223	33.5179	33.5179
	0.116125	-0.0311076	O95487	Protein transport protein Sec24B	SEC24B	11	11	12.5	137.42	39.611	27.1507	27.3578	27.391	27.17	27.3828	27.2535	27.6998	27.7195	27.6389	NaN	27.965	27.6595
	0.0343711	-0.0310586	Q8NBM4	Ubiquitin-associated domain-containing protein 2	UBAC2	4	4	20.3	38.963	10.448	25.5255	25.3645	26.1819	25.8974	25.7645	25.317	26.5898	26.8741	26.965	27.1214	26.5898	26.8504
	0.0541112	-0.0309938	Q6YP21	Kynurenine--oxoglutarate transaminase 3	CCBL2	7	7	20.7	51.4	10.492	27.0505	26.8385	27.4154	27.0084	26.9316	27.2714	NaN	NaN	NaN	NaN	26.8623	NaN
	0.0966227	-0.030899	P26373	60S ribosomal protein L13	RPL13	11	11	46	24.261	63.751	32.4919	32.1392	32.4654	32.362	32.333	32.3088	31.8497	32.2869	32.341	32.7453	32.3542	32.3646
	0.0601685	-0.030873	P09110	3-ketoacyl-CoA thiolase, peroxisomal	ACAA1	17	17	58.3	44.292	130.76	29.84	30.0609	30.2759	29.7911	30.0737	30.2193	30.0217	29.94	29.7958	30.2422	30.1483	30.0737
	0.079568	-0.0307986	P54105	Methylosome subunit pICln	CLNS1A	4	4	43.5	26.215	108.87	28.1795	28.6146	28.3951	28.3452	28.2847	28.4668	28.2216	28.2535	28.0864	NaN	28.5646	28.189
	0.49204	-0.0305684	Q9UKF6	Cleavage and polyadenylation specificity factor subunit 3	CPSF3	14	14	32.3	77.485	83.634	29.4012	29.4154	29.3828	29.3848	29.4032	29.3196	28.9316	28.8945	28.9677	29.0634	28.9002	28.7486
	0.0502021	-0.0304699	P52434	DNA-directed RNA polymerases I, II, and III subunit RPABC3	POLR2H	7	7	42	17.143	49.366	29.9259	29.8142	29.537	30.0737	29.5862	29.5259	29.5333	29.6146	29.5165	29.7533	30.4032	29.4957
	0.119002	-0.0302855	Q9NP97;Q8TF09	Dynein light chain roadblock-type 1;Dynein light chain roadblock-type 2	DYNLRB1;DYNLRB2	6	6	82.3	10.921	25.955	30.1483	30.2308	30.0349	30.0217	30.2535	30.0479	30.1483	29.9677	29.9117	30.0217	30.0609	29.94
	0.126911	-0.0301825	Q9UHI6	Probable ATP-dependent RNA helicase DDX20	DDX20	9	9	16.5	92.239	38.845	28.2714	28.2847	28.1459	28.2353	28.0609	28.3153	27.3494	NaN	26.7895	NaN	27.4785	27.4073
	0.124756	-0.030138	Q96KR1	Zinc finger RNA-binding protein	ZFR	20	20	31.4	117.01	266.36	29.4532	29.5772	29.7309	29.5682	29.6146	29.4881	29.4649	29.57	29.5933	29.6612	29.8355	29.5591
	0.0155486	-0.030077	P22681	E3 ubiquitin-protein ligase CBL	CBL	5	5	8.1	99.632	3.1723	25.6513	25.9716	25.705	24.4794	26.4055	26.3528	NaN	NaN	NaN	NaN	NaN	NaN
	0.0869958	-0.0297763	P19388	DNA-directed RNA polymerases I, II, and III subunit RPABC1	POLR2E	5	5	36.2	24.551	45.423	28.141	27.8916	28.1842	27.9595	27.965	28.203	27.9814	28.0813	27.7453	28.249	27.9031	27.9203
	0.189454	-0.0297222	P33240	Cleavage stimulation factor subunit 2	CSTF2	10	5	29.6	60.959	101.73	28.7453	28.7581	28.9088	28.7162	28.805	28.8019	28.0084	27.8623	28.17	28.9595	28.5862	27.632
	0.0867721	-0.0296783	Q02543	60S ribosomal protein L18a	RPL18A	11	11	47.2	20.762	30.111	31.2814	30.94	31.0283	30.9882	31.1842	30.9882	30.846	30.9677	31.1604	31.611	31.0084	31.341
	0.128459	-0.0296021	Q07866	Kinesin light chain 1	KLC1	20	13	42.6	65.309	134.33	30.4433	30.5844	30.5933	30.3724	30.5754	30.5844	30.2535	30.2077	30.2647	29.6865	29.9814	30.1483
	0.11862	-0.0295766	Q96QR8	Transcriptional activator protein Pur-beta	PURB	8	8	45.8	33.24	74.143	28.9484	29.1386	29.0401	29.0296	29.1288	28.8799	28.7864	28.6831	28.7676	28.6629	28.8945	28.7064
	0.115506	-0.0290229	Q12972	Nuclear inhibitor of protein phosphatase 1;Activator of RNA decay	PPP1R8	8	8	49.9	38.478	67.999	28.1507	28.4512	28.3066	28.3023	28.217	28.3023	28.141	27.8564	28.066	NaN	27.7129	28.1984
	0.0854382	-0.0287895	Q9Y6Y8	SEC23-interacting protein	SEC23IP	17	17	25	111.08	82.593	29.7244	29.6022	29.8843	29.5682	29.6881	29.8682	29.5296	29.1189	29.4804	29.6216	29.3303	29.3662
	0.097096	-0.028464	Q9Y2S7	Polymerase delta-interacting protein 2	POLDIP2	9	9	36.4	42.033	21.104	28.9484	28.8173	28.995	29.0322	28.7227	28.9203	28.8741	28.877	28.7292	28.9344	28.8858	29.109
	0.0802313	-0.0282669	Q9H061	Transmembrane protein 126A	TMEM126A	5	5	22.6	21.527	6.0837	26.4024	26.5135	26.6865	26.3776	26.6865	26.4536	26.3811	26.4984	NaN	NaN	26.632	26.5165
	0.111027	-0.0282536	Q12802	A-kinase anchor protein 13	AKAP13	38	38	26.4	307.55	261.62	29.8294	30.0217	29.9259	29.8741	30.0349	29.7833	27.611	25.4234	26.1965	NaN	NaN	24.8904
	0.100284	-0.0280431	P30153	Serine/threonine-protein phosphatase 2A 65 kDa regulatory subunit A alpha isoform	PPP2R1A	31	23	65.5	65.308	323.31	33.4334	33.3698	33.3828	33.5641	33.2619	33.2759	33.5527	33.5641	33.4702	33.715	33.4823	33.3568
	0.135024	-0.0277494	P62266	40S ribosomal protein S23	RPS23	4	4	42	15.807	8.2819	29.995	29.8608	30.0609	30.0349	29.9259	29.8726	28.8741	28.8564	29.4492	NaN	NaN	29.3001
	0.0684782	-0.0276712	Q9HCU5	Prolactin regulatory element-binding protein	PREB	10	10	39.3	45.468	48.346	28.267	28.2123	28.391	28.2353	28.0505	28.5014	28.1795	28.5646	28.4629	28.4551	28.5573	28.2216
	0.116546	-0.0275796	Q8TBX8	Phosphatidylinositol 5-phosphate 4-kinase type-2 gamma	PIP4K2C	10	10	27.3	47.299	29.975	28.2847	28.4354	28.3023	28.17	28.391	28.3787	28.805	28.7988	29.0349	28.8019	28.6251	28.7096
	0.172462	-0.0273774	Q9NRX1	RNA-binding protein PNO1	PNO1	7	7	37.7	27.924	15.301	27.604	27.5609	27.4629	27.4314	27.5389	27.5754	28.0711	28.0296	28.0349	NaN	NaN	28.0557
	0.0651099	-0.0272706	P25445	Tumor necrosis factor receptor superfamily member 6	FAS	7	7	29.9	37.732	139.98	27.6865	27.9428	27.7581	27.5463	27.976	27.7833	28.2891	28.4194	28.5646	28.5898	28.4274	28.55
	0.0292358	-0.0271454	P00491	Purine nucleoside phosphorylase	PNP	17	17	80.6	32.118	195.54	32.4184	31.901	31.8682	32.5481	31.7849	31.7731	31.1604	31.099	30.4334	31.6198	31.196	30.4334
	0.159922	-0.0271212	P24666	Low molecular weight phosphotyrosine protein phosphatase	ACP1	8	8	66.5	18.042	178.34	31.2759	31.2535	31.2703	31.2703	31.1177	31.3303	31.2365	31.3356	31.2135	31.7333	31.3724	31.3196
	0.0629025	-0.0269585	P34932	Heat shock 70 kDa protein 4	HSPA4	47	45	68.3	94.33	323.31	34.0911	33.8328	33.7353	34.0349	33.87	33.6735	33.6198	33.6088	33.5754	33.7553	33.5179	33.3828
	0.0524026	-0.0268682	P29992	Guanine nucleotide-binding protein subunit alpha-11	GNA11	10	5	36.8	42.123	22.482	29.0375	29.5165	29.1866	29.0453	29.4093	29.2054	29.4785	29.6578	29.3745	29.995	29.94	29.651
	0.106735	-0.0268548	P06753	Tropomyosin alpha-3 chain	TPM3	19	9	42.1	32.95	323.31	31.7494	31.8937	31.6881	31.6285	31.8608	31.7613	31.525	31.6415	31.7129	31.9882	31.6501	31.6923
	0.0846205	-0.0268148	P09497	Clathrin light chain B	CLTB	5	5	15.7	25.19	7.293	29.1676	29.362	29.0583	29.2467	29.2285	29.0322	29.114	29.066	28.9595	29.5109	NaN	29.0057
	0.117231	-0.0267944	P26599	Polypyrimidine tract-binding protein 1	PTBP1	23	20	71.2	57.221	317.03	33.6088	33.3828	33.5062	33.5179	33.3698	33.5296	33.715	33.3956	33.6088	33.1498	33.5062	33.6944
	0.0128009	-0.0267162	Q53FA7	Quinone oxidoreductase PIG3	TP53I3	8	8	37	35.536	14.271	27.5463	28.4113	28.8264	27.3494	28.0349	29.3196	NaN	NaN	NaN	NaN	NaN	NaN
	0.148505	-0.0265376	Q99873	Protein arginine N-methyltransferase 1	PRMT1	13	13	39.1	42.461	86.579	30.9188	30.8234	30.8901	30.7453	30.8534	30.9539	30.947	30.9882	30.8974	30.6964	30.9746	30.995
	0.0737508	-0.0263863	Q8TDQ7	Glucosamine-6-phosphate isomerase 2	GNPDA2	8	3	46.7	31.084	39.493	27.0505	27.2803	27.2262	26.965	27.189	27.3239	27.726	NaN	27.0505	NaN	NaN	NaN
	0.0568524	-0.026329	P31948	Stress-induced-phosphoprotein 1	STIP1	37	37	61.3	62.639	323.31	34.4943	34.4272	34.1753	34.5121	34.4146	34.0911	34.3303	34.3502	34.0673	34.4146	34.2828	33.9591
	0.0472975	-0.0262782	Q9NR46	Endophilin-B2	SH3GLB2	9	9	30.1	43.973	27.682	26.6998	26.3083	26.7517	26.7389	26.632	26.3101	27.4551	27.2625	27.2803	26.4676	26.976	27.3578
	0.0752479	-0.0262426	Q12769	Nuclear pore complex protein Nup160	NUP160	22	22	24.5	162.12	49.921	28.3951	28.2535	28.019	28.2759	28.2216	28.0914	28.17	28.1604	28.4274	28.4862	28.6629	28.1937
	0.0344604	-0.0260035	Q13426	DNA repair protein XRCC4	XRCC4	8	8	28.9	38.286	18.587	27.4394	27.3066	27.524	26.9116	27.7195	27.5609	27.5682	27.5682	27.6527	NaN	NaN	NaN
	0.0475727	-0.0259209	P62328	Thymosin beta-4;Hematopoietic system regulatory peptide	TMSB4X	8	8	88.6	5.0526	310.59	35.6442	35.6033	35.2265	35.6944	35.4611	35.2408	35.5978	35.5556	35.4051	36.2175	35.8469	35.5209
	0.0812938	-0.0254402	Q15181	Inorganic pyrophosphatase	PPA1	19	19	76.8	32.66	315.21	33.4083	33.1161	33.1331	33.3033	33.1664	33.1115	32.8883	32.881	32.8737	32.8829	32.7771	32.6944
	0.120982	-0.0254339	P16615	Sarcoplasmic/endoplasmic reticulum calcium ATPase 2	ATP2A2	28	22	38.3	114.76	280.27	32.2308	32.0017	32.1664	32.0381	32.1513	32.1331	32.3303	32.635	32.463	32.901	32.622	32.4967
	0.042868	-0.0254205	P62829	60S ribosomal protein L23	RPL23	8	8	52.1	14.865	40.554	32.1052	31.6544	32.2336	32.0316	31.7771	32.1084	31.2591	31.611	31.7613	31.6066	31.8719	32.1901
	0.0853868	-0.0253245	P38919	Eukaryotic initiation factor 4A-III;Eukaryotic initiation factor 4A-III, N-terminally processed	EIF4A3	26	23	72.7	46.871	67.726	31.3196	31.0927	31.4083	31.3033	31.1544	31.2869	31.015	30.8755	30.9609	30.8829	31.0349	31.2308
	0.0522648	-0.0250676	P52732	Kinesin-like protein KIF11	KIF11	23	23	30.3	119.16	135.28	30.1842	29.9117	29.8726	30.1604	29.7113	30.0217	28.4234	28.5203	29.0137	NaN	26.1642	26.7895
	0.273155	-0.0249221	Q66K74	Microtubule-associated protein 1S;MAP1S heavy chain;MAP1S light chain	MAP1S	23	23	38.5	112.21	91.513	29.4254	29.4433	29.5315	29.4113	29.4668	29.4473	29.8385	29.7849	29.8035	29.5862	29.7597	30.0737
	0.0545833	-0.0247358	P18669	Phosphoglycerate mutase 1	PGAM1	19	19	79.9	28.804	323.31	34.0512	33.6735	33.7946	34.0101	33.6307	33.8042	33.9848	33.933	33.8234	34.6088	34.0512	33.87
	0.0297495	-0.0245361	P02545	Prelamin-A/C;Lamin-A/C	LMNA	47	46	64.3	74.139	323.31	32.9916	33.3828	33.5641	32.8774	33.3568	33.6307	33.9933	34.0184	33.9153	34.4519	34.3033	34.1377
	0.200797	-0.0243632	P46777	60S ribosomal protein L5	RPL5	16	16	56.9	34.362	58.061	32.779	32.7373	32.7888	32.7373	32.8234	32.6713	32.635	32.7731	32.7573	32.9539	32.9677	32.7868
	0.0668294	-0.0241508	Q14185	Dedicator of cytokinesis protein 1	DOCK1	13	13	9.5	215.34	16.023	26.2944	26.2607	26.1681	25.9955	26.4089	26.2463	26.433	26.346	26.5359	NaN	26.2926	26.1055
	0.0763665	-0.024114	Q9NVP1	ATP-dependent RNA helicase DDX18	DDX18	15	15	36.9	75.406	72.789	29.7309	29.4374	29.49	29.611	29.4012	29.5736	29.6424	29.8004	30.0084	29.9259	29.8579	29.8579
	0.0484807	-0.0239105	Q96KG9	N-terminal kinase-like protein	SCYL1	19	19	35.8	89.63	58.784	29.1866	29.3494	29.4433	29.019	29.3515	29.537	29.3088	29.2935	29.4512	29.3303	29.0479	29.099
	0.0229822	-0.0238756	Q14019	Coactosin-like protein	COTL1	6	6	50.7	15.945	24.95	30.3303	30.0084	29.8065	30.4919	30.1483	29.4334	30.4134	30.5203	30.1361	28.4746	30.4727	30.2308
	0.11323	-0.0235653	Q9H6T3	RNA polymerase II-associated protein 3	RPAP3	13	13	23	75.718	29.879	28.4433	28.341	28.4629	28.4707	28.4433	28.2625	28.2847	28.391	28.3153	28.4394	28.1652	28.189
	0.117661	-0.0234146	P09496	Clathrin light chain A	CLTA	5	5	14.9	27.076	9.0963	29.1115	29.0479	29.1771	29.203	29.0737	28.9896	28.5315	28.5352	NaN	29.1724	28.5609	28.3324
	0.0733685	-0.0227559	Q9BY42	Protein RTF2 homolog	RTFDC1	4	4	17.6	33.886	39.352	26.5898	26.9316	26.8504	26.8142	26.6998	26.7895	NaN	NaN	NaN	NaN	NaN	NaN
	0.172925	-0.0219332	P53992	Protein transport protein Sec24C	SEC24C	22	21	29.3	118.32	76.097	31.1483	31.2308	31.3033	31.1724	31.2135	31.2308	31.6285	31.7573	31.6022	31.94	31.8157	31.6501
	0.0925819	-0.0218506	Q14690	Protein RRP5 homolog	PDCD11	34	34	25.1	208.7	149.36	29.7096	29.4765	29.7178	29.5555	29.6458	29.6372	29.391	29.5278	29.6163	29.3452	29.6128	29.843
	0.062911	-0.0217978	Q14155	Rho guanine nucleotide exchange factor 7	ARHGEF7	8	8	17.8	90.011	29.936	27.6458	27.4938	27.5609	27.3324	27.5898	27.7129	28.3109	28.3109	28.258	27.9539	28.0965	28.1984
	0.08475	-0.021766	Q9NUQ8	ATP-binding cassette sub-family F member 3	ABCF3	17	17	34.8	79.744	48.889	29.8726	29.84	30.1115	29.8872	29.8901	29.9814	29.8112	29.4532	29.747	28.7613	29.2353	29.5407
	0.1533	-0.0213992	P50990	T-complex protein 1 subunit theta	CCT8	39	39	75.7	59.62	218.39	34.3169	34.4519	34.3698	34.3892	34.3956	34.2897	33.4458	33.4083	33.3828	33.6415	33.4083	33.1989
	0.0583229	-0.0211372	P11172	Uridine 5-monophosphate synthase;Orotate phosphoribosyltransferase;Orotidine 5-phosphate decarboxylase	UMPS	11	11	34.8	52.221	67.726	29.2147	28.906	29.2193	29.0762	28.9787	29.2216	29.8593	29.7958	29.7389	29.7453	29.8755	29.8608
	0.03931	-0.0209529	Q9P035	Very-long-chain (3R)-3-hydroxyacyl-CoA dehydratase 3	HACD3	9	9	31.5	43.159	59.629	29.4727	29.0427	29.3787	29.3828	29.027	29.4214	28.7833	28.9539	29.0401	28.726	29.0864	28.9896
	0.101718	-0.0209529	P46776	60S ribosomal protein L27a	RPL27A	6	6	35.1	16.561	16.657	31.196	31.0737	31.225	31.0927	31.2591	31.08	30.8385	31.0017	31.1422	31.6544	31.3463	31.2135
	0.0238569	-0.0208804	O75521	Enoyl-CoA delta isomerase 2, mitochondrial	ECI2	11	11	44.9	43.585	146.78	28.8858	29.1866	29.3346	28.6075	29.2602	29.4765	30.0609	30.0609	30.0217	30.5573	30.3088	30.2759
	0.0685899	-0.0206928	P28838	Cytosol aminopeptidase	LAP3	23	23	54.9	56.166	241.56	31.8234	32.0447	32.0479	31.8042	32.0017	32.0479	32.1239	32.0544	31.7731	32.0832	32.0737	31.8422
	0.0480234	-0.0206731	P61011	Signal recognition particle 54 kDa protein	SRP54	15	15	36.7	55.704	251.57	29.1842	29.4492	29.5826	29.2445	29.3578	29.5518	29.3683	29.267	29.2123	29.8445	29.3066	29.1676
	0.020725	-0.0203044	Q6UW63	KDEL motif-containing protein 1	KDELC1	9	9	24.7	58.042	14.242	27.5165	27.2625	27.019	27.5536	27.524	26.6595	27.509	27.6527	27.5389	27.524	27.6181	27.3992
	0.0632872	-0.0202624	P67870	Casein kinase II subunit beta	CSNK2B	6	6	37.2	24.942	39.882	29.632	29.5296	29.6268	29.7802	29.524	29.4234	29.4453	29.3023	29.4394	29.258	28.9512	29.2825
	0.143997	-0.0201499	O00429	Dynamin-1-like protein	DNM1L	31	31	59.9	81.876	323.31	31.1901	31.0609	31.1664	31.1664	31.0544	31.1361	31.4483	31.393	31.3982	31.4581	31.3088	31.2924
	0.0566328	-0.020064	P19784	Casein kinase II subunit alpha	CSNK2A2	9	9	31.4	41.213	41.994	28.5352	28.2979	28.17	28.3951	28.3494	28.1984	28.3578	28.5898	28.6663	NaN	28.4668	28.4938
	0.0481069	-0.0198485	Q9UBI1	COMM domain-containing protein 3	COMMD3	6	6	39	22.151	8.9676	26.2856	26.2299	25.9157	26.0547	26.0296	26.2874	NaN	NaN	NaN	NaN	NaN	NaN
	0.0698103	-0.0196311	Q7L014	Probable ATP-dependent RNA helicase DDX46	DDX46	27	27	33.7	117.36	108.82	30.3724	30.1483	30.2193	30.3724	30.1483	30.1604	29.9259	29.8945	29.9117	30.3828	30.0609	30.0737
	0.066442	-0.0195332	Q9Y6I3	Epsin-1	EPN1	11	10	29.7	60.293	86.803	29.0164	29.104	29.1913	28.906	29.1747	29.1724	28.6181	28.3745	28.8887	NaN	27.5969	27.5463
	0.0149136	-0.019523	O75352	Mannose-P-dolichol utilization defect 1 protein	MPDU1	4	4	21.1	26.638	7.4497	27.1214	26.53	27.6798	26.8623	26.7645	27.6458	27.1015	27.3324	27.4938	27.1507	27.1015	27.5389
	0.038834	-0.0193431	P00918	Carbonic anhydrase 2	CA2	19	19	72.3	29.246	323.31	33.4083	33.8328	33.715	33.4581	33.8422	33.5978	35.8281	35.7378	35.5383	36.099	35.972	35.697
	0.106656	-0.0193354	Q9BWF3	RNA-binding protein 4	RBM4	15	4	54.4	40.313	238.47	30.6285	30.5296	30.5014	30.6372	30.4629	30.5014	29.9677	29.8474	30.099	28.8294	29.6355	30.1604
	0.0829345	-0.0189184	Q7Z5K2	Wings apart-like protein homolog	WAPAL	17	17	23.9	132.94	49.92	27.5315	27.5754	27.509	27.4154	27.4707	27.673	27.1507	27.2077	27.217	27.4394	27.4938	27.2891
	0.121708	-0.0187658	Q02878	60S ribosomal protein L6	RPL6	16	16	46.2	32.728	138.72	33.3698	33.2336	33.3033	33.3303	33.3169	33.2033	33.0848	33.2033	33.4209	32.333	33.0848	33.1068
	0.0306088	-0.0185483	Q9HB71	Calcyclin-binding protein	CACYBP	14	14	68.4	26.21	323.31	33.2897	33.1331	32.8755	33.3956	33.0067	32.8403	32.5389	32.5366	32.5822	31.9435	32.1901	32.1842
	0.0349602	-0.0184282	O75427	Leucine-rich repeat and calponin homology domain-containing protein 4	LRCH4	13	13	36.3	73.449	140.85	28.6216	28.2535	28.3367	28.6527	28.3196	28.1842	28.9869	28.5609	28.8887	28.6075	28.4707	28.5646
	0.0275038	-0.0183856	Q9BV20	Methylthioribose-1-phosphate isomerase	MRI1	4	4	17.9	39.149	10.959	25.772	26.0233	26.2353	25.6317	26.17	26.1738	25.8093	NaN	25.7945	NaN	NaN	NaN
	0.0372625	-0.0182336	P23921	Ribonucleoside-diphosphate reductase large subunit	RRM1	31	31	55.8	90.069	202.28	31.325	30.8901	30.933	31.2135	30.9259	30.9539	32.0017	31.8755	31.9643	31.8571	31.6198	31.7652
	0.0182671	-0.0181796	P20908	Collagen alpha-1(V) chain	COL5A1	17	17	18.6	183.56	166.32	29.6303	29.995	30.0084	29.2781	30.3196	29.9814	29.7014	29.7129	29.5646	30.2422	29.8142	29.668
	0.067495	-0.0181065	P22307	Non-specific lipid-transfer protein	SCP2	18	18	37.3	58.993	148.77	30.0349	30.2193	30.0609	29.94	30.1724	30.1483	30.5109	30.362	30.2308	30.9259	30.8004	30.3724
	0.0320278	-0.0173257	Q9Y3U8	60S ribosomal protein L36	RPL36	4	4	32.4	12.254	7.013	31.4334	31.0479	31.0737	31.4284	31.0864	30.9882	30.8385	31.0609	31.1544	30.4727	30.4532	31.2193
	0.310623	-0.0172106	O00232	26S proteasome non-ATPase regulatory subunit 12	PSMD12	23	23	48.2	52.904	170.43	31.2591	31.2535	31.2135	31.2019	31.2135	31.2591	31.4384	31.4184	31.3088	31.3463	31.4678	31.4184
	0.18308	-0.0171636	Q13177	Serine/threonine-protein kinase PAK 2;PAK-2p27;PAK-2p34	PAK2	15	10	51.7	58.042	178.36	30.099	30.1115	30.1483	30.0479	30.1604	30.099	29.7195	29.4234	29.5389	28.805	29.4629	29.1189
	0.0405927	-0.0168521	Q9H900	Protein zwilch homolog	ZWILCH	4	4	8.6	67.213	5.3633	25.3811	25.5492	25.6403	25.3031	25.7155	25.5014	NaN	NaN	NaN	NaN	NaN	24.5983
	0.00370667	-0.0166868	Q13085	Acetyl-CoA carboxylase 1;Biotin carboxylase	ACACA	21	21	15.9	265.55	48.92	28.7064	26.5638	25.4473	29.066	25.3444	26.2571	28.7162	28.3196	28.17	27.1015	26.1155	25.7517
	0.052405	-0.0166715	O14672	Disintegrin and metalloproteinase domain-containing protein 10	ADAM10	7	7	15.4	84.141	36.953	27.1312	26.976	26.9088	26.9316	27.1604	26.8741	26.6458	26.9428	NaN	NaN	27.2262	27.0084
	0.068517	-0.0166651	P12270	Nucleoprotein TPR	TPR	56	56	30.7	267.29	323.31	30.8755	30.7613	30.6881	30.8829	30.7292	30.6629	30.94	30.947	30.9746	31.5664	31.1239	31.0927
	0.0499905	-0.0166601	Q58FF8	Putative heat shock protein HSP 90-beta 2	HSP90AB2P	10	2	20.5	44.348	66.581	31.7965	31.846	31.7333	31.9643	31.7771	31.5844	32.3905	32.525	32.2193	30.94	32.0609	31.8119
	0.181158	-0.0165997	Q12874	Splicing factor 3A subunit 3	SF3A3	15	15	37.1	58.848	311.24	30.7849	30.7692	30.7692	30.8157	30.6964	30.7613	30.4727	30.6285	30.5296	30.9117	30.8309	30.7613
	0.0363646	-0.0164382	Q7Z460	CLIP-associating protein 1	CLASP1	19	17	20.9	169.45	166.43	28.1604	27.8682	27.6663	27.9539	27.9146	27.7771	29.1337	29.4214	29.5591	27.8974	28.8799	28.8142
	0.0730578	-0.0161819	Q9HCN8	Stromal cell-derived factor 2-like protein 1	SDF2L1	4	4	38	23.598	134.41	27.5389	27.632	27.4154	27.5389	27.5754	27.4234	26.9203	27.2803	26.9316	NaN	NaN	NaN
	0.0596752	-0.015899	Q9UGI8	Testin	TES	19	19	56.3	47.996	323.31	31.196	31.341	31.325	31.1361	31.4134	31.2647	31.1422	30.9814	31.611	29.9677	30.7129	31.3303
	0.0831456	-0.0154406	P35637	RNA-binding protein FUS	FUS	15	13	24	53.425	185.28	33.1842	33.2897	33.2897	33.2193	33.1544	33.3436	33.0233	32.9814	33.015	32.6198	33.1604	33.2619
	0.207416	-0.0150197	Q8IZH2	5-3 exoribonuclease 1	XRN1	14	14	12.7	194.1	95.731	28.1263	28.1604	28.1556	28.1065	28.1842	28.1065	27.8324	27.8623	28.1747	26.9977	27.0914	27.7771
	0.033352	-0.0148913	Q9UNP9	Peptidyl-prolyl cis-trans isomerase E	PPIE	7	7	43.9	33.43	19.254	27.6527	27.4938	27.1507	27.3745	27.4073	27.4707	27.7129	27.7645	27.5754	NaN	27.8504	27.5315
	0.0349438	-0.0148284	Q92667	A-kinase anchor protein 1, mitochondrial	AKAP1	5	5	11	97.34	9.8121	26.673	26.6998	26.726	26.7895	26.8623	26.4024	NaN	NaN	NaN	NaN	NaN	NaN
	0.0687587	-0.014684	P62333	26S protease regulatory subunit 10B	PSMC6	20	20	62.5	44.172	72.945	32.0084	32.1544	32.1724	31.9916	32.1331	32.1664	31.4134	31.4134	31.4581	31.5978	31.2759	31.4483
	0.0427547	-0.0145537	P51809	Vesicle-associated membrane protein 7	VAMP7	10	10	54.5	24.935	29.724	27.9031	27.8682	27.5898	27.8445	27.8203	27.6527	27.9146	28.4154	28.0296	27.7895	28.0453	28.2445
	0.0400376	-0.0145378	Q14919	Dr1-associated corepressor	DRAP1	5	5	28.3	22.35	9.4486	27.0914	27.3992	27.2077	27.0505	27.3239	27.2803	26.9203	27.3239	26.9316	27.2535	27.2445	26.976
	0.0288191	-0.0145334	P60983	Glia maturation factor beta	GMFB	5	3	60.6	16.713	57.599	29.1263	29.2285	29.4294	29.1115	29.094	29.5352	27.6527	27.6527	28.0557	NaN	27.3324	28.0864
	0.0849401	-0.0144418	A0FGR8	Extended synaptotagmin-2	ESYT2	23	23	37.6	102.36	151.58	29.7597	29.611	29.7629	29.6389	29.6964	29.7549	30.2869	30.4334	30.5933	30.0864	30.2869	30.3196
	0.0512165	-0.0141239	P62873	Guanine nucleotide-binding protein G(I)/G(S)/G(T) subunit beta-1	GNB1	15	9	67.4	37.377	323.31	31.3828	31.2869	31.2193	31.2479	31.4384	31.1604	31.1783	31.0217	30.8755	31.5933	31.2422	31.0737
	0.0539084	-0.0139071	O94776	Metastasis-associated protein MTA2	MTA2	20	17	38.3	75.022	49.289	30.6713	30.6285	30.6285	30.5109	30.5754	30.8004	30.0864	30.0084	30.362	30.2647	30.341	30.3196
	0.0402292	-0.0137927	Q16881	Thioredoxin reductase 1, cytoplasmic	TXNRD1	16	16	37.9	70.905	201.62	30.7373	30.995	30.8974	30.6964	31.0017	30.8901	31.0609	30.9882	31.225	30.8974	30.995	31.2365
	0.0168561	-0.0136725	P50748	Kinetochore-associated protein 1	KNTC1	9	9	5.7	250.75	11.682	26.5045	27.4154	26.9428	26.8264	27.0084	26.9869	26.0711	26.2353	25.9293	NaN	25.5841	25.8904
	0.0785694	-0.0134029	P13073	Cytochrome c oxidase subunit 4 isoform 1, mitochondrial	COX4I1	7	7	43.2	19.576	43.526	30.8534	30.7292	30.7373	30.8157	30.7927	30.6713	30.3724	30.4919	30.4433	31.0084	30.7373	30.6285
	0.0343259	-0.0132987	O95602	DNA-directed RNA polymerase I subunit RPA1	POLR1A	12	12	11.9	194.81	21.91	26.5419	26.5045	26.5404	26.6595	26.632	26.2553	26.2607	26.506	26.632	NaN	NaN	NaN
	0.0821616	-0.0132605	Q8IWX8	Calcium homeostasis endoplasmic reticulum protein	CHERP	15	15	28.6	103.7	115.45	30.196	30.3088	30.3724	30.2979	30.2308	30.3088	29.8173	29.8279	29.8355	29.9814	29.8385	29.8294
	0.0802431	-0.0131645	Q99567	Nuclear pore complex protein Nup88	NUP88	10	10	22.7	83.541	293.83	28.7771	28.8474	28.6629	28.7708	28.7708	28.7064	28.7421	28.5426	28.5862	28.55	28.6931	28.6075
	0.0201089	-0.0131454	O60701	UDP-glucose 6-dehydrogenase	UGDH	28	28	76.3	55.023	323.31	31.7453	32.0283	32.1694	31.6285	32.2336	32.0414	32.3223	32.0705	31.9365	31.9365	32.0576	31.9712
	0.0498273	-0.0129751	Q9UMX5	Neudesin	NENF	6	6	51.7	18.856	25.581	29.3724	29.4134	29.3828	29.2869	29.5536	29.2891	28.49	28.6898	28.6251	29.21	28.8203	28.6964
	0.0598221	-0.0127741	P04075	Fructose-bisphosphate aldolase A	ALDOA	33	28	86.8	39.42	323.31	35.3403	35.4943	35.4853	35.327	35.515	35.4396	35.1791	35.0832	35.0911	34.3436	34.9242	34.8792
	0.0411619	-0.0126534	P21281	V-type proton ATPase subunit B, brain isoform	ATP6V1B2	14	14	36.2	56.5	35.126	29.8127	29.5407	29.8127	29.8081	29.6303	29.6898	30.0084	30.0084	29.8065	30.4727	30.0609	29.94
	0.168196	-0.0122643	P53041	Serine/threonine-protein phosphatase 5	PPP5C	18	18	45.1	56.878	257.16	31.1239	31.099	31.0349	31.0864	31.0737	31.0609	30.7849	30.9117	30.8608	31.0414	30.8385	30.846
	0.0633869	-0.012125	P22061	Protein-L-isoaspartate(D-aspartate) O-methyltransferase	PCMT1	8	8	56.4	24.636	61.857	31.3088	31.4184	31.3515	31.4032	31.2308	31.4083	30.2979	30.196	30.099	30.6458	30.5933	30.2308
	0.0216483	-0.0119305	O15460	Prolyl 4-hydroxylase subunit alpha-2	P4HA2	20	20	46.7	60.901	121.59	31.5754	31.4134	31.13	31.4234	31.5481	31.1115	30.9677	30.947	30.7692	31.4134	31.225	30.7292
	0.032716	-0.0117836	Q5JVF3	PCI domain-containing protein 2	PCID2	10	10	35.1	46.029	94.813	27.6251	27.5014	27.6527	27.7129	27.3578	27.673	27.5536	27.509	27.3828	27.673	27.6798	27.4707
	0.225454	-0.0115712	P50395	Rab GDP dissociation inhibitor beta	GDI2	34	24	77.3	50.663	323.31	33.9591	33.9933	33.9763	33.933	33.9677	33.9933	33.87	33.8328	33.7653	33.7946	33.6522	33.6735
	0.0267714	-0.0115662	Q9NV70	Exocyst complex component 1	EXOC1	12	12	24.6	101.98	16.894	27.2077	27.1214	27.5682	27.2353	27.3828	27.2445	27.2445	26.9316	27.4154	NaN	NaN	27.0505
	0.020291	-0.0113703	Q86X55	Histone-arginine methyltransferase CARM1	CARM1	10	10	28.8	65.853	33.053	28.7096	28.726	28.3745	28.8858	28.4668	28.4234	28.4113	28.5165	28.066	28.2535	28.2847	28.1164
	0.0409069	-0.0113169	P78347	General transcription factor II-I	GTF2I	42	42	49.2	112.42	319.13	31.933	31.7771	31.9609	31.8792	31.7494	32.0084	31.6154	31.4134	31.4678	31.7613	31.5799	31.4483
	0.0283958	-0.0112985	O14979	Heterogeneous nuclear ribonucleoprotein D-like	HNRNPDL	13	12	22.9	46.437	102.24	31.7006	31.6372	31.8422	31.7211	31.5062	31.9188	31.4919	31.6586	31.6242	31.6242	31.5435	31.7692
	0.0206722	-0.0112413	Q99426	Tubulin-folding cofactor B	TBCB	8	8	49.2	27.325	33.211	29.461	29.1435	29.158	29.4785	29.2825	28.9677	28.9705	29.0505	29.0864	28.9259	28.9896	28.8203
	0.0434958	-0.0112394	Q7Z4R8	UPF0669 protein C6orf120	C6orf120	2	2	34	20.772	23.672	28.1652	28.3536	28.3109	28.362	28.2979	28.1361	NaN	27.9814	NaN	NaN	NaN	28.2891
	0.0362602	-0.0108859	Q6P2Q9	Pre-mRNA-processing-splicing factor 8	PRPF8	79	79	45.4	273.6	323.31	32.4991	32.3223	32.3698	32.4184	32.2222	32.5179	32.0609	32.1544	32.2478	32.2422	32.2675	32.2786
	0.0135914	-0.0108312	Q9H9S5	Fukutin-related protein	FKRP	4	4	12.3	54.567	18.448	25.9998	26.4536	26.4536	25.8647	26.4488	26.5609	NaN	NaN	NaN	NaN	NaN	NaN
	0.0221277	-0.0107969	O75886	Signal transducing adapter molecule 2	STAM2	7	5	16.4	58.164	11.637	27.1214	27.3745	27.3828	27.0084	27.3828	27.4551	NaN	NaN	27.2714	NaN	NaN	27.3992
	0.0127999	-0.0105737	Q14676	Mediator of DNA damage checkpoint protein 1	MDC1	17	17	17.6	226.66	279.56	28.203	27.4394	27.5682	27.8974	27.8264	27.4551	28.1263	28.217	28.341	28.2891	28.1795	28.5352
	0.0159734	-0.0103823	O75365	Protein tyrosine phosphatase type IVA 3	PTP4A3	5	5	48.6	19.535	6.9488	26.4488	26.3959	26.6181	26.7895	26.5507	26.0914	NaN	NaN	NaN	NaN	NaN	NaN
	0.0674462	-0.0102704	P25789	Proteasome subunit alpha type-4	PSMA4	9	9	51	29.483	130	31.4871	31.6629	31.6022	31.5889	31.5481	31.5844	31.6458	31.5664	31.3776	31.7129	31.7613	31.3672
	0.018591	-0.010217	P11908	Ribose-phosphate pyrophosphokinase 2	PRPS2	12	4	47.8	34.769	150.3	30.4032	29.8901	30.0737	30.3088	29.9539	30.0737	30.4823	30.3196	30.362	30.393	30.2077	30.3515
	0.0375828	-0.00993919	Q6P9B9	Integrator complex subunit 5	INTS5	6	6	12.4	107.99	15.925	26.5105	26.2299	26.3101	26.3992	26.3359	26.2856	NaN	NaN	26.1214	26.3101	NaN	26.2243
	0.0507245	-0.00980695	P11216	Glycogen phosphorylase, brain form	PYGB	27	26	42.8	96.695	243.95	30.6798	30.6544	30.5573	30.5109	30.6798	30.6713	31.1724	31.1783	31.0414	31.1052	31.015	31.0217
	0.0352288	-0.00973384	O96019	Actin-like protein 6A	ACTL6A	15	15	47.6	47.46	164.92	32.0479	31.9882	31.8829	32.1146	31.933	31.8422	31.6242	31.5844	31.7088	31.7533	31.4775	31.6154
	0.0185334	-0.00948334	Q8IXT5	RNA-binding protein 12B	RBM12B	8	8	8.3	118.1	8.4762	27.4629	27.4234	27.8203	27.6527	27.3324	27.6931	27.1984	27.2535	27.3828	27.3992	27.3745	27.2353
	0.0518085	-0.00942993	Q96T23	Remodeling and spacing factor 1	RSF1	23	23	23.1	163.82	323.31	29.2308	29.2007	29.1842	29.2535	29.0737	29.2602	29.0965	29.1795	29.1263	29.0609	29.3452	29.3023
	0.0311863	-0.00918579	Q01082	Spectrin beta chain, non-erythrocytic 1	SPTBN1	156	143	69.1	274.61	323.31	35.1068	35.3469	35.327	35.1262	35.3033	35.3236	35.8608	35.9041	35.886	36.097	35.9242	35.8815
	0.0395399	-0.00896009	P63172	Dynein light chain Tctex-type 1	DYNLT1	5	5	79.6	12.452	155.65	29.3828	29.5184	29.4881	29.5772	29.3557	29.4294	29.6372	29.6268	28.9896	29.5071	29.5315	29.459
	0.0634694	-0.00889524	Q9HD45	Transmembrane 9 superfamily member 3	TM9SF3	11	11	19.7	67.887	115.74	29.6303	29.766	29.6764	29.6814	29.6337	29.7309	29.7988	29.7421	29.6093	30.1115	29.788	29.7227
	0.0280847	-0.00883484	Q9P2E9	Ribosome-binding protein 1	RRBP1	44	43	38.7	152.45	323.31	32.4943	32.622	32.5686	32.375	32.717	32.5664	33.015	33.0479	32.8627	33.5412	33.2759	33.1161
	0.0148714	-0.00877889	Q9UJU6	Drebrin-like protein	DBNL	15	15	45.1	48.207	224	30.5844	31.0927	30.8682	30.5933	30.8974	31.0283	31.2535	31.2308	31.1664	31.4775	31.2365	30.995
	0.0261943	-0.00874138	P18754	Regulator of chromosome condensation	RCC1	11	11	48.9	44.969	46.613	29.0375	28.877	28.8887	29.1065	28.7645	28.906	28.1556	28.217	28.5315	28.8741	28.5754	28.459
	0.0338292	-0.00873947	Q9NRG9	Aladin	AAAS	15	15	40.7	59.573	48.997	29.537	29.3303	29.2891	29.4551	29.362	29.3131	29.189	29.0839	29.4765	NaN	28.7195	29.2825
	0.0202539	-0.00840251	Q9HC07	Transmembrane protein 165	TMEM165	7	7	28.7	34.905	49.882	29.3787	29.2512	29.0531	29.0296	29.3724	29.2557	29.3324	29.21	29.2422	29.6629	29.1483	29.3971
	0.0326235	-0.00839551	P63010	AP-2 complex subunit beta	AP2B1	39	24	44.2	104.55	271.83	31.5799	31.4775	31.3142	31.525	31.4284	31.393	31.933	31.9814	31.9365	31.947	31.9574	31.7731
	0.0234452	-0.00830269	P62633	Cellular nucleic acid-binding protein	CNBP	6	6	42.9	19.463	146.42	29.537	29.5754	29.6285	29.7958	29.509	29.4113	28.7895	28.9977	29.2007	NaN	28.8945	29.1676
	0.0171774	-0.00790787	Q96TC7	Regulator of microtubule dynamics protein 3	RMDN3	7	7	22.6	52.118	16.756	27.2714	27.6595	27.1795	27.2803	27.4154	27.391	NaN	NaN	27.2714	NaN	26.5898	26.8504
	0.0284543	-0.00729879	Q2TAL8	Glutamine-rich protein 1	QRICH1	4	4	11.6	86.435	189.33	27.5536	27.7958	27.6527	27.6998	27.5609	27.7195	27.6998	27.3494	27.4314	NaN	27.6458	27.6663
	0.0611111	-0.00714366	O75643	U5 small nuclear ribonucleoprotein 200 kDa helicase	SNRNP200	81	81	50.7	244.5	323.31	32.6242	32.5458	32.5933	32.5618	32.5343	32.6458	32.1901	32.2308	32.2869	32.4581	32.2279	32.3115
	0.0206977	-0.00706228	Q9Y3B3	Transmembrane emp24 domain-containing protein 7	TMED7	7	7	38.4	25.171	40.268	29.1652	29.2781	29.5071	29.21	29.3282	29.391	29.4862	29.5352	29.3536	29.4688	29.9117	29.6713
	0.0187685	-0.00691096	O15511	Actin-related protein 2/3 complex subunit 5	ARPC5	5	5	52.3	16.32	49.881	29.4053	29.6022	29.6612	29.3641	29.6058	29.6781	30.4919	30.393	30.4334	30.8234	30.7292	30.4629
	0.0146553	-0.00666173	O43663	Protein regulator of cytokinesis 1	PRC1	6	6	15.5	71.606	14.894	27.2077	27.019	27.019	27.2979	27.1015	26.8264	26.1234	26.1194	26.6181	NaN	NaN	NaN
	0.0246605	-0.00653839	Q8IY81	pre-rRNA processing protein FTSJ3	FTSJ3	12	12	26	96.557	71.373	28.9705	29.1604	29.2399	29.1937	29.0864	29.0711	28.6181	28.509	28.7864	28.9512	28.7292	28.6931
	0.0771432	-0.00643857	P48556	26S proteasome non-ATPase regulatory subunit 8	PSMD8	12	12	37.7	39.611	291.93	30.5664	30.5754	30.6022	30.5389	30.6285	30.5573	30.4919	30.6629	30.6372	30.1483	30.341	30.4727
	0.0114934	-0.00642649	P49915	GMP synthase [glutamine-hydrolyzing]	GMPS	21	21	41.7	76.715	91.547	30.7211	30.362	30.4134	30.7849	30.362	30.3303	30.1239	30.1724	30.0217	30.2193	30.0217	30.1361
	0.0217131	-0.00641505	Q01433	AMP deaminase 2	AMPD2	8	8	12.3	100.69	32.374	27.9203	27.8916	27.7389	28.003	27.7895	27.7389	27.7708	27.5969	27.8623	NaN	27.2625	27.5898
	0.0116602	-0.00626055	P15531	Nucleoside diphosphate kinase A	NME1	12	6	86.2	17.149	55.012	31.5296	31.2759	31.3828	31.7047	31.1724	31.2924	31.2979	31.0349	31.015	31.4433	31.0017	30.8974
	0.0168196	-0.00622177	O43396	Thioredoxin-like protein 1	TXNL1	14	14	54.7	32.251	241.13	31.2814	31.4775	31.5844	31.325	31.393	31.6066	30.362	30.362	30.6544	30.846	30.3515	30.2759
	0.0199994	-0.00607999	Q14432	cGMP-inhibited 3,5-cyclic phosphodiesterase A	PDE3A	24	23	36.4	124.98	178.53	30.5933	30.5754	30.8309	30.6629	30.5573	30.7613	30.5109	30.6458	30.6713	29.6848	30.0217	30.6022
	0.0120057	-0.00595729	Q9H3K6	BolA-like protein 2	BOLA2	4	4	61.6	10.116	70.757	30.393	30.1483	29.8755	30.2535	30.1239	30.0217	29.9117	29.8741	29.9814	30.0349	29.9539	29.4957
	0.053747	-0.00592232	P38606	V-type proton ATPase catalytic subunit A	ATP6V1A	23	23	54.5	68.303	102.51	29.9259	29.8519	29.9539	29.94	29.8623	29.9117	30.1604	30.1842	29.94	30.0084	30.0609	29.8974
	0.0138799	-0.00563431	P22392	Nucleoside diphosphate kinase B	NME2	12	2	75	17.298	107.26	34.6198	34.3763	34.5238	34.7099	34.3169	34.4763	34.3303	34.2478	34.1377	34.5179	34.2048	34.1529
	0.012355	-0.00528908	P63151	Serine/threonine-protein phosphatase 2A 55 kDa regulatory subunit B alpha isoform	PPP2R2A	14	7	43	51.691	114.8	29.6492	29.2308	29.3992	29.5591	29.389	29.3153	29.4053	29.4995	29.2825	29.668	29.2399	29.2262
	0.0108803	-0.00524203	P05556	Integrin beta-1	ITGB1	16	16	30.1	88.414	79.1	30.5389	30.8901	30.6629	30.4532	30.846	30.7771	30.7771	30.9259	30.9539	30.9188	30.8081	31.1544
	0.0306395	-0.00502268	P48739	Phosphatidylinositol transfer protein beta isoform	PITPNB	15	14	62.4	31.54	120.55	29.9259	29.94	29.8564	29.995	29.8829	29.8294	30.099	30.0217	29.8785	29.4194	30.0349	29.9259
	0.00521153	-0.00499662	Q8NF37	Lysophosphatidylcholine acyltransferase 1	LPCAT1	6	6	18.5	59.151	112.14	29.2869	29.6075	29.7988	29.0084	29.8726	29.7973	28.5352	29.0453	29.4214	28.5278	28.459	29.0453
	0.00576017	-0.0047067	Q8WYP5	Protein ELYS	AHCTF1	17	17	12.6	252.5	101.68	27.1214	26.3778	26.7771	27.019	26.4661	26.7771	27.0711	26.9428	27.141	27.1507	26.632	26.8504
	0.0194128	-0.00466983	Q15006	ER membrane protein complex subunit 2	EMC2	7	7	37	34.833	20.261	27.8142	27.7958	27.604	27.6527	27.8019	27.7453	27.1312	27.6798	27.6595	NaN	27.8324	27.7195
	0.0278744	-0.00446955	O15228	Dihydroxyacetone phosphate acyltransferase	GNPAT	8	8	18.8	77.187	40.671	26.7389	26.8385	26.726	26.6998	26.8385	26.7517	26.4908	26.5478	26.673	NaN	NaN	NaN
	0.00937416	-0.00442251	Q13418	Integrin-linked protein kinase	ILK	13	13	36.3	51.419	36.486	28.6424	29.0609	29.0453	28.8081	28.8741	29.0531	29.0217	28.9146	29.1842	29.6814	29.0003	29.3807
	0.0138013	-0.00434748	P22087	rRNA 2-O-methyltransferase fibrillarin	FBL	10	9	46.4	33.784	102.83	31.0283	30.7129	30.7692	30.8901	30.846	30.7613	30.1842	30.362	30.611	30.7692	30.4727	30.947
	0.0148862	-0.00426992	Q5RKV6	Exosome complex component MTR3	EXOSC6	4	4	21.7	28.235	27.904	28.4194	28.5536	28.49	28.4113	28.6561	28.3828	28.3452	28.3662	28.5536	28.3787	28.4551	28.6216
	0.0164475	-0.00411161	Q99996	A-kinase anchor protein 9	AKAP9	17	17	6	452.98	84.742	26.7645	27.019	26.965	26.965	26.9088	26.8623	26.9203	26.8741	26.7895	26.6595	27.1984	NaN
	0.00799981	-0.00409126	Q15031	Probable leucine--tRNA ligase, mitochondrial	LARS2	8	8	14.8	101.97	16.676	26.3101	26.1469	26.5478	26.3376	26.1174	26.5374	26.5898	NaN	NaN	NaN	26.6595	26.9203
	0.055691	-0.00407537	Q14203	Dynactin subunit 1	DCTN1	38	38	41.3	141.69	323.31	31.1842	31.1724	31.13	31.1901	31.1604	31.1239	31.13	31.1239	31.0673	31.4134	31.2479	31.0349
	0.0143855	-0.00379117	Q5VIR6	Vacuolar protein sorting-associated protein 53 homolog	VPS53	9	9	19.6	79.652	14.127	27.1507	27.1214	27.3066	27.0711	27.2979	27.1984	27.6931	27.6458	27.604	NaN	27.611	27.5826
	0.0132664	-0.00375748	O95347	Structural maintenance of chromosomes protein 2	SMC2	22	22	23.5	135.65	108.96	29.5463	29.3346	29.2308	29.3515	29.391	29.3578	28.8264	28.9117	29.1676	27.632	28.8504	28.8445
	0.0144837	-0.00374921	O75607	Nucleoplasmin-3	NPM3	6	6	60.1	19.343	286.77	29.9117	29.8234	29.668	29.7692	29.7325	29.8901	29.6578	29.6146	29.747	NaN	29.8445	29.7244
	0.0181758	-0.00345675	Q92626	Peroxidasin homolog	PXDN	37	37	47.2	165.27	253.11	30.8974	30.8385	31.0217	30.8829	30.8829	30.9814	30.0084	29.6848	29.94	29.1556	29.4571	29.8564
	0.0116183	-0.00342814	O00231	26S proteasome non-ATPase regulatory subunit 11	PSMD11	28	28	66.1	47.463	75.771	31.8829	31.6839	31.5978	31.8081	31.7047	31.6415	32.0283	32.1177	32.0283	32.1483	31.9539	31.9045
	0.00857406	-0.00331942	Q92791	Synaptonemal complex protein SC65	LEPREL4	4	4	11.9	50.381	9.0117	27.7325	27.5536	27.341	27.611	27.4234	27.5826	NaN	NaN	NaN	NaN	NaN	NaN
	0.0225483	-0.00306511	Q9NR45	Sialic acid synthase	NANS	9	9	40.1	40.307	90.327	29.8974	29.995	29.9259	29.995	29.8741	29.94	30.4134	30.4234	30.2869	31.13	30.4134	30.362
	0.00535041	-0.00303268	O75083	WD repeat-containing protein 1	WDR1	27	27	64.4	66.193	323.31	33.2178	33.4702	33.6629	33.1798	33.5754	33.5867	34.0266	34.0101	34.0911	33.4702	33.9153	33.9848
	0.0123627	-0.00299899	P08397	Porphobilinogen deaminase	HMBS	4	4	16.6	39.33	7.7759	26.3153	26.527	26.433	26.4073	26.341	26.518	NaN	NaN	NaN	NaN	NaN	NaN
	0.0157376	-0.00297419	Q12789	General transcription factor 3C polypeptide 1	GTF3C1	18	18	13.2	238.87	41.676	28.1263	28.1795	28.019	28.0864	28.0453	28.1842	28.0296	27.6251	28.3109	NaN	27.7389	28.217
	0.00978878	-0.00289663	Q9UMY4	Sorting nexin-12	SNX12	7	5	38.4	19.73	30.384	28.391	28.3153	28.0914	28.3109	28.2891	28.189	27.8203	NaN	28.0557	NaN	28.4194	27.7517
	0.0078886	-0.00277519	Q9Y6B6	GTP-binding protein SAR1b	SAR1B	8	5	66.7	22.41	28.699	29.1747	29.267	29.0813	28.9732	29.3153	29.2262	28.9977	29.0003	28.8019	NaN	28.0084	28.6898
	0.00516131	-0.00266774	Q9BZE1	39S ribosomal protein L37, mitochondrial	MRPL37	12	12	45.9	48.117	25.703	28.4113	28.1015	28.1164	28.459	27.9923	28.17	28.17	28.0609	28.217	28.1604	28.6424	28.6146
	0.0106005	-0.00252406	Q5RI15	Cytochrome c oxidase protein 20 homolog	COX20	4	4	33.1	13.291	38.744	27.9539	27.9146	28.1164	28.0557	27.8974	28.0243	27.3239	27.5463	27.6798	28.362	NaN	28.1065
	0.0321556	-0.00242742	P47756	F-actin-capping protein subunit beta	CAPZB	15	15	60.3	31.35	64.309	32.025	32.0544	32.0641	32.0316	32.0895	32.015	32.3115	32.3223	32.1901	32.5085	32.4159	32.13
	0.0167204	-0.00221888	Q9H074	Polyadenylate-binding protein-interacting protein 1	PAIP1	12	12	35.5	53.524	37.477	30.4823	30.5481	30.6198	30.5203	30.5844	30.5389	30.4727	30.7453	30.5754	30.7047	30.5481	30.4032
	0.00303875	-0.00211779	Q9BY32	Inosine triphosphate pyrophosphatase	ITPA	7	7	53.1	21.445	18.221	28.7988	28.673	29.3196	28.9231	28.7357	29.1263	28.7645	28.6285	28.189	29.1747	28.7676	28.6764
	0.00232144	-0.0020841	Q99470	Stromal cell-derived factor 2	SDF2	3	3	25.1	23.026	65.15	27.1795	26.6595	27.2714	27.3494	27.1507	26.604	27.5969	27.7389	27.5315	28.0813	NaN	28.003
	0.00683136	-0.00183296	P09417	Dihydropteridine reductase	QDPR	10	10	53.3	25.789	45.32	29.4234	29.6181	29.6233	29.4374	29.6268	29.5951	29.3704	29.4294	29.1239	29.8489	29.4804	29.3662
	0.012259	-0.00170644	P47897	Glutamine--tRNA ligase	QARS	30	30	47.7	87.798	122.33	31.1604	31.0349	31.1115	31.0864	31.0609	31.1544	31.0217	30.8755	30.8385	31.0544	30.7613	30.7533
	0.00476444	-0.00168482	P30043	Flavin reductase (NADPH)	BLVRB	8	8	65.5	22.119	66.192	30.6198	30.7927	30.8004	30.5389	30.8081	30.8608	30.2647	30.2759	30.1239	30.5203	30.1239	30.362
	0.00340591	-0.00158246	Q9UGP8	Translocation protein SEC63 homolog	SEC63	16	16	22.5	87.996	156.62	29.2239	28.7517	29.0401	28.9705	28.9117	29.1288	27.8385	28.4032	28.189	28.604	28.6492	28.459
	0.00612129	-0.00154813	P28370	Probable global transcription activator SNF2L1	SMARCA1	28	15	25.4	122.6	25.897	27.3239	27.17	27.3066	27.189	27.2077	27.3992	26.5478	26.965	26.8264	26.6458	26.9088	26.9316
	0.00694549	-0.0015227	P54727	UV excision repair protein RAD23 homolog B	RAD23B	14	11	47.2	43.171	112.81	30.6964	30.8534	30.8829	30.7292	30.8755	30.8234	31.6022	31.6198	31.5343	31.6544	31.6372	31.6066
	0.00570345	-0.00143242	Q9H1I8	Activating signal cointegrator 1 complex subunit 2	ASCC2	4	4	9.8	86.359	9.8117	26.0793	26.0955	25.9428	26.1312	26.0732	25.9088	25.8623	26.1015	25.8788	NaN	NaN	NaN
	0.00822681	-0.00125885	Q06210	Glutamine--fructose-6-phosphate aminotransferase [isomerizing] 1	GFPT1	34	34	59.4	78.806	311.52	32.4134	32.5366	32.5226	32.4507	32.5527	32.4654	32.8347	32.8516	32.7888	33.1544	32.7633	32.6329
	0.0029008	-0.00123533	Q8WVM7	Cohesin subunit SA-1	STAG1	11	9	15.6	144.43	157.56	27.0813	27.0401	26.7389	27.1214	26.9088	26.8264	NaN	NaN	NaN	NaN	NaN	NaN
	0.00160369	-0.00122515	Q9BTV5	Fibronectin type III and SPRY domain-containing protein 1	FSD1	7	7	22.2	55.819	15.055	26.8741	26.5507	26.3629	26.9203	26.2317	26.632	26.2607	26.4877	NaN	26.6998	26.4723	NaN
	0.00392891	-0.0011692	Q9NV56	MRG/MORF4L-binding protein	MRGBP	3	3	27.5	22.417	6.3151	26.5029	26.2021	26.2926	26.3861	26.3528	26.2553	NaN	NaN	NaN	NaN	NaN	NaN
	0.00363906	-0.00100072	P50995	Annexin A11	ANXA11	12	12	23.6	54.389	64.246	29.6198	29.7162	29.7786	29.5682	29.8355	29.708	29.1459	29.2935	29.267	29.4707	29.4473	29.5682
	0.00242393	-0.00094986	P31150	Rab GDP dissociation inhibitor alpha	GDI1	31	21	73.6	50.582	296.9	31.933	32.1177	32.005	31.8755	32.2478	31.9295	32.4184	32.4108	32.1842	32.2336	32.4134	32.1989
	0.00218798	-0.000846863	Q92599	Septin-8	2020-09-08	11	9	30.2	55.756	32.605	28.6527	28.8623	28.7771	28.611	28.9787	28.6998	28.7833	28.5352	28.4938	28.4113	28.6492	28.6595
	0.006962	-0.000663122	O00303	Eukaryotic translation initiation factor 3 subunit F	EIF3F	10	10	31.9	37.563	31.58	30.4532	30.4629	30.4532	30.4532	30.4032	30.5109	30.4334	30.4032	30.3724	30.1483	30.2869	30.2193
	0.00329587	-0.000647863	P10599	Thioredoxin	TXN	8	8	86.7	11.737	15.084	31.4775	31.611	31.5754	31.6285	31.5754	31.4581	32.0641	31.8719	31.7533	31.8571	31.7613	31.9188
	0.00445744	-0.000626246	Q13425	Beta-2-syntrophin	SNTB2	8	8	20.4	57.949	11.476	26.6595	26.673	26.7389	26.7517	26.6998	26.6181	26.8623	26.726	26.4984	26.6458	26.8974	26.2262
	0.00484587	-0.000610987	Q15717	ELAV-like protein 1	ELAVL1	13	13	45.1	36.091	38.45	31.1664	31.1052	31.1052	31.196	31.099	31.08	30.995	30.9814	30.933	30.7927	31.1483	31.0217
	0.00218164	-0.000598907	Q0VDF9	Heat shock 70 kDa protein 14	HSPA14	9	9	28.5	54.794	37.002	28.391	28.3951	28.189	28.2077	28.3828	28.3828	28.3662	28.1747	28.5052	NaN	27.6798	28.2123
	0.00247504	-0.000466665	Q13617	Cullin-2	CUL2	16	16	31.4	86.982	28.712	28.0296	27.8445	27.9595	27.9203	27.9088	28.003	27.8682	28.1795	27.9595	27.5315	27.9031	NaN
	0.00354595	-0.000267029	P30041	Peroxiredoxin-6	PRDX6	24	24	80.8	25.035	236.6	34.3033	34.2759	34.2689	34.3169	34.2408	34.2897	34.5867	34.6995	34.4883	35.1679	34.8516	34.6415
	0.000216781	-0.000217438	Q4KMQ2	Anoctamin-6	ANO6	8	8	15.1	106.16	23.112	27.391	28.2308	27.5826	27.3239	27.9259	27.9539	27.673	27.632	27.6251	NaN	NaN	28.2399
	0.000866972	-0.000190099	Q9NXG2	THUMP domain-containing protein 1	THUMPD1	15	15	58.1	39.315	159.93	29.9259	29.7927	29.7676	29.9259	29.7486	29.8112	30.0217	29.995	30.0084	30.5296	30.1483	30.196
	0.000850497	-0.000157038	Q93009	Ubiquitin carboxyl-terminal hydrolase 7	USP7	31	31	38	128.3	207.3	30.6798	30.611	30.7533	30.7211	30.5933	30.7292	30.8234	30.8004	30.6881	30.8081	30.8755	30.9539
	0.00022499	0.000190735	Q6UB35	Monofunctional C1-tetrahydrofolate synthase, mitochondrial	MTHFD1L	17	17	29	105.79	35.36	28.8504	28.267	28.673	28.9456	28.203	28.6424	27.2891	27.9372	27.7708	27.9977	27.4394	27.965
	0.00279612	0.000308355	P68400;Q8NEV1	Casein kinase II subunit alpha;Casein kinase II subunit alpha 3	CSNK2A1;CSNK2A3	12	12	48.6	45.143	116.51	30.4532	30.3515	30.393	30.4032	30.4334	30.362	30.3088	30.1115	30.196	30.3515	30.2647	30.0609
	0.00052982	0.000507991	Q92804	TATA-binding protein-associated factor 2N	TAF15	6	4	18.6	61.829	20.743	28.632	28.2353	27.8019	28.5128	28.3196	27.8385	28.3494	28.7549	28.3324	29.8035	28.8916	28.5426
	0.00236578	0.000526428	P28074	Proteasome subunit beta type-5	PSMB5	13	13	56.7	28.48	124.35	31.08	31.1422	31.3033	31.1783	31.1239	31.225	30.8157	30.8682	30.7292	30.4234	30.7292	31.015
	0.00113293	0.000640869	P54577	Tyrosine--tRNA ligase, cytoplasmic;Tyrosine--tRNA ligase, cytoplasmic, N-terminally processed	YARS	37	37	70.1	59.143	303.27	32.7514	32.5296	32.3698	32.8385	32.4654	32.3489	33.8328	33.7849	33.5754	33.4458	33.6629	33.4702
	0.00158066	0.000746409	P61254;Q9UNX3	60S ribosomal protein L26;60S ribosomal protein L26-like 1	RPL26;RPL26L1	7	7	37.9	17.258	6.3609	30.362	29.9539	30.4532	30.2308	30.2759	30.2647	30.1842	30.4727	30.2979	30.7211	30.7129	30.4919
	0.00358019	0.000951131	P52565	Rho GDP-dissociation inhibitor 1	ARHGDIA	9	9	70.1	23.207	204.59	33.6415	33.7751	33.6415	33.6415	33.8328	33.5867	33.7751	33.9417	33.6629	34.2336	33.9417	33.6944
	0.000978568	0.000958125	Q86UA1	Pre-mRNA-processing factor 39	PRPF39	3	3	6.4	78.429	9.0539	25.6944	24.7617	25.6716	25.3273	25.5463	25.2571	NaN	NaN	NaN	NaN	NaN	NaN
	0.00563914	0.00129445	Q9BQ52	Zinc phosphodiesterase ELAC protein 2	ELAC2	24	24	46.5	92.218	87.912	29.9117	30.0349	30.1239	29.9814	29.9814	30.1115	29.9259	29.9117	30.0349	30.099	29.9677	29.995
	0.0041181	0.00155576	Q9BZF1	Oxysterol-binding protein-related protein 8	OSBPL8	10	10	17	101.19	44.293	27.4862	27.17	27.1795	27.4073	27.1795	27.2535	28.2759	28.5646	28.4551	28.49	28.0965	28.391
	0.00827209	0.00163142	O43583	Density-regulated protein	DENR	8	8	42.4	22.092	323.31	29.6798	29.6303	29.7708	29.632	29.6595	29.7942	29.3971	29.7309	29.4274	30.362	30.0217	29.7911
	0.00451359	0.00174967	Q53ET0	CREB-regulated transcription coactivator 2	CRTC2	6	6	21.1	73.301	30.939	26.2463	26.527	26.2225	26.4122	26.1719	26.417	NaN	NaN	NaN	NaN	NaN	NaN
	0.0032564	0.00183423	P16383	GC-rich sequence DNA-binding factor 2	GCFC2	8	8	14.5	89.384	64.586	27.7708	27.6798	27.611	27.9814	27.7195	27.3662	26.3324	26.8504	27.1604	NaN	27.0401	26.2571
	0.0194689	0.00252597	Q9NYF8	Bcl-2-associated transcription factor 1	BCLAF1	18	17	24.2	106.12	215.29	30.6022	30.5203	30.5573	30.611	30.5844	30.4919	30.2193	29.8173	30.2077	30.0349	30.1483	30.1483
	0.00656865	0.00253169	O14656	Torsin-1A	TOR1A	7	7	26.5	37.808	9.6188	26.8504	26.6458	26.7129	26.9316	26.7389	26.5463	27.5463	27.5463	27.9146	NaN	27.5463	27.341
	0.0120072	0.00261752	Q16851	UTP--glucose-1-phosphate uridylyltransferase	UGP2	21	21	52.6	56.94	260.68	31.1604	31.3828	31.3303	31.2422	31.325	31.3142	31.3463	31.3356	31.3088	31.6329	31.2703	31.4083
	0.00469805	0.0028731	Q9P015	39S ribosomal protein L15, mitochondrial	MRPL15	8	8	34.1	33.419	13.168	28.3494	27.9977	28.0505	28.4707	27.9705	27.965	27.6663	27.6527	28.217	NaN	NaN	28.5389
	0.00618438	0.0030365	O95490	Latrophilin-2	LPHN2	24	24	26.4	163.35	177.1	29.109	29.3431	29.3001	28.9705	29.4413	29.3494	29.5128	29.2736	29.4995	29.3787	29.5591	29.5627
	0.0257472	0.00320943	Q9H488	GDP-fucose protein O-fucosyltransferase 1	POFUT1	9	9	42	43.955	106.03	29.8974	29.8814	29.9117	29.8534	29.8653	29.9814	29.4492	29.341	29.1386	29.3088	29.2239	29.5352
	0.0190295	0.00323041	Q5T4S7	E3 ubiquitin-protein ligase UBR4	UBR4	93	93	27.3	573.83	323.31	32.0609	32.08	31.9259	32.015	31.9814	32.08	32.0927	32.08	32.0117	32.1901	32.0769	31.8608
	0.00442629	0.0033404	Q05682	Caldesmon	CALD1	36	36	32.9	93.23	323.31	34.0017	34.5062	34.5811	34.0349	34.5698	34.4943	34.0266	33.9933	34.4209	34.3236	33.9677	34.4083
	0.0264505	0.00350316	Q9BT78	COP9 signalosome complex subunit 4	COPS4	21	21	68.2	46.268	104.94	30.5664	30.6881	30.6713	30.6022	30.6544	30.6798	30.8608	30.7613	30.7613	30.9539	30.7533	30.7453
	0.00801246	0.00381533	Q16718	NADH dehydrogenase [ubiquinone] 1 alpha subcomplex subunit 5	NDUFA5	5	5	65.5	13.459	78.005	29.7958	29.4919	29.7453	29.9259	29.5128	29.6058	29.1724	29.3951	29.3724	30.0609	29.509	29.6005
	0.00857225	0.00386302	Q07960	Rho GTPase-activating protein 1	ARHGAP1	20	20	69	50.435	234.8	31.0673	31.2759	31.3776	31.0349	31.2591	31.4384	32.5844	32.5777	32.5179	32.2422	32.2393	32.4108
	0.00197547	0.00401052	Q92536	Y+L amino acid transporter 2	SLC7A6	2	2	8.7	56.827	10.861	27.3066	27.604	25.5404	27.1312	26.632	26.6998	26.7129	26.632	26.9088	NaN	26.3795	26.1738
	0.0182149	0.0040741	O14579	Coatomer subunit epsilon	COPE	14	14	64.3	34.482	148.53	30.6458	30.7927	30.7292	30.6285	30.8385	30.7129	30.8901	30.9539	30.933	31.1842	31.1544	30.9117
	0.0215253	0.00413195	O15145	Actin-related protein 2/3 complex subunit 3	ARPC3	10	10	50	20.546	75.433	29.6831	29.7864	29.8355	29.8593	29.7047	29.7533	30.8004	30.933	30.9539	30.7047	30.9882	30.9045
	0.0717165	0.00423495	Q9UID3	Vacuolar protein sorting-associated protein 51 homolog	VPS51	14	14	25.7	86.041	46.156	28.3023	28.3367	28.2979	28.3239	28.341	28.2847	28.6831	28.6964	28.611	28.6998	28.362	28.5862
	0.033013	0.00424512	P48444	Coatomer subunit delta	ARCN1	25	25	55	57.21	62.226	30.8608	30.9188	30.94	30.8385	30.9539	30.94	31.0609	31.0217	31.0414	31.0864	30.9539	31.0544
	0.00647662	0.00454458	Q16513	Serine/threonine-protein kinase N2	PKN2	12	12	21.3	112.03	34.271	27.0711	27.4234	27.4473	27.5609	26.9316	27.4629	26.4536	27.0609	NaN	NaN	NaN	26.4234
	0.0105974	0.00469907	A0AVT1	Ubiquitin-like modifier-activating enzyme 6	UBA6	25	25	36.2	117.97	80.885	28.9344	28.8682	28.7486	29.1263	28.7129	28.726	29.7064	29.7146	29.8081	29.7096	29.6389	29.6163
	0.0178244	0.00471115	P11021	78 kDa glucose-regulated protein	HSPA5	41	40	61.8	72.332	323.31	35.4883	35.6006	35.5296	35.4883	35.7047	35.4396	36.1165	36.1358	36.099	36.5412	36.3135	36.1242
	0.0274278	0.00472196	P28072	Proteasome subunit beta type-6	PSMB6	7	7	54	25.357	76.952	30.933	31.0609	31.0673	31.0017	31.099	30.9746	31.2924	31.2077	31.3033	31.846	31.1052	31.362
	0.01217	0.00479889	O00170	AH receptor-interacting protein	AIP	14	14	54.5	37.636	109.41	29.8858	29.6915	29.5352	29.8035	29.7771	29.5463	29.4374	29.5147	29.2957	29.7437	29.459	29.4842
	0.0088383	0.00515811	P07686	Beta-hexosaminidase subunit beta;Beta-hexosaminidase subunit beta chain B;Beta-hexosaminidase subunit beta chain A	HEXB	18	18	36	63.111	114.56	31.0544	30.846	30.5014	30.9677	30.8385	30.611	30.8901	30.6458	30.6372	30.9882	30.9814	31.08
	0.0121103	0.0052503	Q96IX5	Up-regulated during skeletal muscle growth protein 5	USMG5	4	4	44.8	6.4575	79.018	29.9117	29.7195	29.6492	29.995	29.7096	29.5916	29.9539	30.4134	30.3088	30.6881	30.5664	30.3515
	0.0256204	0.0055631	P52788	Spermine synthase	SMS	20	20	68	41.268	156.1	30.947	30.7211	30.9117	30.8974	30.8682	30.8309	31.1604	31.1422	30.8234	31.2924	31.1361	30.6285
	0.0261424	0.00573985	P46379	Large proline-rich protein BAG6	BAG6	21	21	32.5	119.41	116.15	30.6372	30.8004	30.5664	30.7211	30.6372	30.6629	30.933	30.8385	30.8081	30.4629	30.7453	30.5664
	0.0239728	0.0058473	Q9Y6C9	Mitochondrial carrier homolog 2	MTCH2	8	8	43.2	33.331	150.29	30.8385	30.6285	30.7533	30.8534	30.6798	30.7047	30.8974	31.0864	31.0609	31.4775	31.2814	31.3568
	0.0929669	0.00611369	O60506	Heterogeneous nuclear ribonucleoprotein Q	SYNCRIP	29	24	55.7	69.602	323.31	33.9677	33.8974	33.9591	33.9505	33.933	33.9591	33.3436	33.4458	33.3568	33.5412	33.4334	33.5062
	0.0183969	0.00612513	Q53GG5	PDZ and LIM domain protein 3	PDLIM3	8	8	31.9	39.232	250.91	30.7613	30.8534	31.0084	30.7129	30.9746	30.9539	30.8081	30.7047	31.0609	31.2019	31.0084	30.9882
	0.0116897	0.00631078	P16435	NADPH--cytochrome P450 reductase	POR	14	14	25.4	76.689	95.731	30.2759	29.7113	30.0217	30.1483	29.9117	29.9677	30.2422	30.2647	30.1842	30.5481	30.2759	30.1483
	0.0289451	0.00640806	Q9BPU6	Dihydropyrimidinase-related protein 5	DPYSL5	12	12	36.2	61.421	43.226	28.7676	28.7864	28.8945	28.7676	28.7517	28.9484	28.8653	29.066	29.0686	29.4334	29.3174	29.21
	0.0130302	0.0065848	P13984	General transcription factor IIF subunit 2	GTF2F2	11	11	60.6	28.38	30.675	28.3992	28.1604	28.3578	28.5933	28.0813	28.2625	28.5536	28.4823	28.5389	NaN	28.3109	28.5014
	0.020031	0.00663122	O75351	Vacuolar protein sorting-associated protein 4B	VPS4B	8	5	26.4	49.301	18.084	27.6931	27.509	27.7129	27.7645	27.4707	27.6998	27.5826	27.8019	27.8682	27.965	27.6931	27.7645
	0.030755	0.00675392	Q9UKM9	RNA-binding protein Raly	RALY	11	11	43.5	32.463	78.024	31.099	31.0479	31.2365	31.1422	31.0479	31.2135	31.0609	31.08	30.8157	31.7888	31.3356	31.3088
	0.020326	0.00681432	Q09028	Histone-binding protein RBBP4	RBBP4	18	13	77.4	47.655	190.71	33.5296	33.2336	33.3033	33.4943	33.2759	33.3169	33.4702	33.4581	33.6088	33.4943	33.2164	33.5296
	0.0300211	0.00729561	Q93008	Probable ubiquitin carboxyl-terminal hydrolase FAF-X	USP9X	40	22	20.5	292.28	125.91	28.9512	29.1115	28.8623	28.9732	29.0505	28.9231	29.588	29.7227	29.4473	29.6216	29.4512	29.4093
	0.0131497	0.00739543	Q9BTV4	Transmembrane protein 43	TMEM43	11	11	42	44.875	68.726	29.5772	29.3766	29.7645	29.3662	29.509	29.8653	29.8173	30.1842	30.1239	30.5109	30.4032	30.5573
	0.0405901	0.00753212	Q92542	Nicastrin	NCSTN	10	10	19.5	78.41	17.749	28.2979	28.17	28.362	28.3367	28.2759	28.2399	28.066	28.1164	27.7958	27.9031	28.3536	28.1937
	0.0624401	0.00753276	P15374	Ubiquitin carboxyl-terminal hydrolase isozyme L3	UCHL3	12	12	69.1	26.182	156.53	29.7613	29.7739	29.726	29.84	29.7244	29.7195	29.6798	29.7292	29.579	29.94	29.7597	29.4919
	0.0252882	0.00754293	Q15019	Septin-2	2020-09-02	17	17	65.4	41.487	310.98	32.3489	32.5481	32.4433	32.2979	32.5732	32.4919	32.0958	32.0769	32.196	32.2077	31.8937	32.2164
	0.0476997	0.00777626	Q9UHB9	Signal recognition particle subunit SRP68	SRP68	23	23	49.8	70.729	279.81	30.8829	31.0017	31.0414	30.9539	30.9539	31.0414	30.9609	30.8081	30.8608	29.7517	30.6544	30.8608
	0.0214342	0.00777944	Q9UKL0;Q9P2K3	REST corepressor 1;REST corepressor 3	RCOR1;RCOR3	7	7	21	53.327	30.068	28.0401	27.9146	28.17	28.2123	27.8799	28.0557	28.3494	27.9539	27.8445	28.4394	27.673	28.0505
	0.0397639	0.00787608	O60502	Protein O-GlcNAcase	MGEA5	21	21	36.5	102.91	106.33	30.3196	30.3196	30.2869	30.3724	30.393	30.1842	30.5296	30.3724	30.5754	30.846	30.2647	30.5481
	0.0321467	0.00807444	O00541	Pescadillo homolog	PES1	10	10	26.9	68.002	18.493	28.877	28.9031	28.7292	28.9456	28.7227	28.8653	28.4032	28.6355	28.3992	28.6697	28.7357	28.579
	0.0460107	0.00809224	Q8NFW8	N-acylneuraminate cytidylyltransferase	CMAS	7	7	21.4	48.379	41.192	27.4938	27.5014	27.4473	27.4394	27.4234	27.604	27.5463	27.5682	27.189	27.6389	27.3828	28.0137
	0.0166833	0.00811704	Q96AT9	Ribulose-phosphate 3-epimerase	RPE	5	5	38.6	24.927	25.657	27.9869	27.524	27.9146	27.6798	27.8385	27.9316	28.7581	28.632	28.6798	29.1628	28.49	28.5463
	0.0597959	0.00824674	P47755	F-actin-capping protein subunit alpha-2	CAPZA2	14	12	72	32.949	295.92	31.4629	31.5109	31.5062	31.4284	31.5844	31.4919	32.2019	32.1634	31.8974	32.099	31.933	31.933
	0.0364813	0.00835164	Q96GG9	DCN1-like protein 1	DCUN1D1	8	8	35.5	30.124	147.38	29.8623	29.9677	29.8474	30.0349	29.8173	29.8504	30.1842	30.1842	29.9814	30.196	30.1604	30.2647
	0.0134716	0.00854174	Q9BRT6	Protein LLP homolog	LLPH	3	3	29.5	15.225	4.9681	26.7895	27.189	27.2077	27.0813	27.341	26.7895	26.8385	NaN	27.0813	NaN	NaN	26.4362
	0.0171562	0.0085729	Q96KA5	Cleft lip and palate transmembrane protein 1-like protein	CLPTM1L	7	7	23	62.228	50.298	29.099	29.0003	29.3023	28.8623	29.2781	29.2869	28.9622	29.3217	29.3787	29.2077	29.2957	29.2957
	0.0180636	0.00860469	P25787	Proteasome subunit alpha type-2	PSMA2	7	7	44.9	25.898	106.65	31.0544	30.7047	31.1604	31.0217	30.8309	31.0927	31.1177	30.7129	30.6285	29.8726	30.9746	30.846
	0.0259973	0.00865491	P41252	Isoleucine--tRNA ligase, cytoplasmic	IARS	53	53	50.4	144.5	298.31	31.8829	31.7453	31.5618	31.8608	31.6629	31.6923	32.7672	32.8042	32.7211	32.7888	32.7829	32.6022
	0.038212	0.00870387	Q12792	Twinfilin-1	TWF1	13	12	40.9	40.282	95.285	30.341	30.4032	30.2647	30.4433	30.3724	30.2193	30.7373	30.6629	30.6881	30.8157	30.2647	30.393
	0.032161	0.00870895	Q15393	Splicing factor 3B subunit 3	SF3B3	38	38	41.2	135.58	255.14	32.7211	32.5867	32.4871	32.7047	32.622	32.4943	32.2842	32.2507	32.3088	32.7313	32.3196	32.375
	0.013405	0.00877062	Q9BWJ5	Splicing factor 3B subunit 5	SF3B5	5	5	59.3	10.135	41.832	30.5481	29.9259	30.2979	30.4727	30.0609	30.2647	29.6981	29.57	29.3174	27.3578	29.55	29.9539
	0.0429641	0.0088679	P54136	Arginine--tRNA ligase, cytoplasmic	RARS	33	33	57	75.378	323.31	32.4309	32.3356	32.2814	32.4334	32.3905	32.2507	32.3515	32.3515	32.196	32.6329	32.393	32.1664
	0.0288778	0.00911013	Q9Y2T2	AP-3 complex subunit mu-1	AP3M1	14	12	47.6	46.939	76.506	29.0084	28.8564	28.7292	28.7389	28.9174	28.965	29.1866	29.0505	29.109	29.5481	29.109	28.9705
	0.0619938	0.00914892	Q96I24	Far upstream element-binding protein 3	FUBP3	21	20	58.9	61.64	122.44	30.4433	30.5573	30.5203	30.4823	30.4727	30.5933	30.5573	30.5109	30.7453	30.5664	30.4823	30.4823
	0.00874465	0.00916545	Q08AM6	Protein VAC14 homolog	VAC14	11	11	21.6	87.972	34.135	28.1937	27.632	27.673	28.4274	27.5898	27.509	28.5128	28.4707	28.4707	28.5609	28.3992	28.1361
	0.0425786	0.00926463	Q9BXP5	Serrate RNA effector molecule homolog	SRRT	19	19	26.7	100.67	144.86	30.5844	30.6629	30.7849	30.6285	30.6544	30.7771	30.2308	30.2869	30.3828	30.8309	30.611	30.4433
	0.0881086	0.0095609	P50454	Serpin H1	SERPINH1	31	31	68.4	46.44	323.31	36.7175	36.6388	36.5978	36.6522	36.6918	36.6388	36.0389	35.6415	36.2084	35.821	35.7677	36.1049
	0.0234436	0.00983429	Q9UKK9	ADP-sugar pyrophosphatase	NUDT5	13	13	56.2	24.327	79.661	29.6915	29.6831	29.5555	29.9117	29.579	29.4688	30.0479	30.0737	29.788	30.0737	29.8549	29.7162
	0.0561073	0.00993729	Q13435	Splicing factor 3B subunit 2	SF3B2	31	31	42.1	100.23	323.31	31.5889	31.5481	31.4678	31.6242	31.5573	31.4532	31.5527	31.4775	31.6881	31.5389	31.4919	31.5527
	0.0204965	0.0101528	Q9UPU5	Ubiquitin carboxyl-terminal hydrolase 24	USP24	27	27	15.5	294.36	62.033	28.5128	28.3992	28.1604	28.509	28.4823	28.1115	29.2285	29.1015	28.9923	28.6424	28.7613	28.8682
	0.0176365	0.0101751	Q9Y2D5	A-kinase anchor protein 2	AKAP2	7	7	16.1	94.659	187.63	27.4473	27.9203	27.9428	27.5754	27.8623	27.9031	28.1164	27.6798	28.4551	NaN	NaN	27.8974
	0.0535996	0.0101929	Q15370	Transcription elongation factor B polypeptide 2	TCEB2	12	12	91.5	13.133	120.96	31.3515	31.2591	31.2193	31.3828	31.2759	31.2019	31.5844	31.5062	31.6022	31.9081	31.5664	31.393
	0.0189974	0.0103442	Q0JRZ9	F-BAR domain only protein 2	FCHO2	4	4	8.5	88.923	14.275	25.4266	25.4457	25.5869	25.6944	25.15	25.6458	NaN	NaN	NaN	NaN	25.5404	NaN
	0.00620664	0.0104612	P21266	Glutathione S-transferase Mu 3	GSTM3	16	15	72.4	26.559	293.4	31.4871	32.4032	32.5686	31.2869	32.5641	32.6394	30.5844	30.4532	30.2193	29.5109	30.5014	30.2422
	0.04528	0.0106964	Q9NYL9	Tropomodulin-3	TMOD3	14	14	47.7	39.594	139.33	29.7771	29.6163	29.7341	29.7581	29.5933	29.8081	30.1724	30.0479	29.9259	30.0349	30.0737	30.0609
	0.0509667	0.010774	Q09161	Nuclear cap-binding protein subunit 1	NCBP1	14	14	25.4	91.838	90.002	29.17	29.2376	29.2123	29.3431	29.1015	29.2077	29.7129	29.7565	29.632	29.94	29.9117	29.5627
	0.0251525	0.0109043	P04350	Tubulin beta-4A chain	TUBB4A	27	3	74.1	49.585	81.31	29.3869	29.0164	29.4473	29.3745	29.3174	29.1913	29.389	28.9841	29.4154	28.1842	28.9231	29.3683
	0.0344674	0.0110524	P55145	Mesencephalic astrocyte-derived neurotrophic factor	MANF	10	10	46.7	20.7	65.076	31.393	31.2814	31.196	31.4083	31.3776	31.1177	30.8755	31.0609	31.099	31.2647	31.2422	31.1422
	0.0213361	0.0110792	Q01469	Fatty acid-binding protein, epidermal	FABP5	17	17	77.8	15.164	323.31	36.0471	36.1828	35.8234	36.099	36.2247	35.7628	36.1165	36.13	35.9505	36.5325	36.2759	36.0793
	0.0907271	0.0112381	O95232	Luc7-like protein 3	LUC7L3	9	9	24.5	51.466	102.78	30.5573	30.6285	30.6372	30.5664	30.6022	30.6881	30.1115	30.2193	30.4234	29.5033	29.9677	30.0349
	0.0316518	0.0112476	Q9P2R3	Rabankyrin-5	ANKFY1	21	21	29	128.4	105.51	29.3044	29.4053	29.5109	29.2123	29.5463	29.4957	29.3599	29.3494	29.3217	28.49	29.1819	29.3217
	0.0315604	0.0116107	Q9H1E3	Nuclear ubiquitous casein and cyclin-dependent kinase substrate 1	NUCKS1	16	16	67.9	27.296	323.31	31.3724	31.1901	31.4483	31.3982	31.1604	31.4871	31.6415	31.6372	31.4032	32.5664	32.2135	31.7849
	0.0491485	0.0116647	Q16799	Reticulon-1	RTN1	8	8	15.2	83.617	20.57	27.2714	27.3153	27.0813	27.2891	27.2535	27.1604	27.3153	27.0914	27.5463	27.3578	NaN	27.019
	0.0191957	0.0118472	Q96IJ6	Mannose-1-phosphate guanyltransferase alpha	GMPPA	6	6	19.8	46.291	13.689	28.0557	28.0914	28.3452	27.8081	28.3494	28.3704	27.5682	26.8974	27.0914	NaN	27.4707	27.4862
	0.0344033	0.0124092	Q9UHD8	Septin-9	2020-09-09	25	25	58.2	65.401	226.07	32.225	32.4159	32.4967	32.2106	32.4581	32.5062	32.1872	32.1021	32.2731	32.3088	31.8534	32.1052
	0.0417523	0.0124537	P46109	Crk-like protein	CRKL	9	9	46.9	33.777	35.748	27.9146	27.9146	27.7958	28.0557	27.8741	27.7325	28.1556	28.003	28.1747	28.4823	28.066	28.019
	0.0355262	0.0125472	Q9Y2B0	Protein canopy homolog 2	CNPY2	9	9	59.3	20.652	39.205	30.1483	30.4234	30.0349	30.1724	30.2759	30.196	30.3724	30.3515	29.9259	30.7292	30.6881	29.9117
	0.0231079	0.0127227	A1X283	SH3 and PX domain-containing protein 2B	SH3PXD2B	8	8	15.9	101.58	13.751	27.1984	27.1795	26.6998	27.1795	27.0505	26.8858	NaN	NaN	NaN	NaN	NaN	NaN
	0.0184003	0.0127614	O00330	Pyruvate dehydrogenase protein X component, mitochondrial	PDHX	4	4	13.2	54.122	9.4186	26.3926	26.2589	26.452	26.604	25.9338	26.604	25.9316	26.2891	26.3101	NaN	NaN	26.632
	0.0177137	0.013066	Q15126	Phosphomevalonate kinase	PMVK	12	12	67.7	21.995	52.134	28.4314	27.9428	28.611	28.4433	28.0609	28.5203	28.0296	27.9372	27.673	NaN	28.2077	28.189
	0.0274605	0.0132217	Q9H3U1	Protein unc-45 homolog A	UNC45A	11	11	16.6	103.08	17.755	27.0505	26.7771	26.7645	27.141	26.7517	26.7389	26.6998	26.8858	26.8741	NaN	26.976	NaN
	0.0241248	0.0132732	Q9Y5L0	Transportin-3	TNPO3	16	16	26.9	104.2	158.59	29.3848	29.1795	28.9677	29.4032	28.9287	29.2399	29.5463	29.7341	29.8711	29.5444	29.6998	29.632
	0.0301973	0.0133336	P35268	60S ribosomal protein L22	RPL22	4	3	45.3	14.787	26.768	31.978	31.5978	32.0084	31.7849	32.0084	31.8309	31.3672	31.7373	31.6839	31.6586	31.6501	31.9224
	0.0400053	0.0133553	P28066	Proteasome subunit alpha type-5	PSMA5	11	11	52.7	26.411	323.31	32.1574	32.2869	32.3802	32.1331	32.2759	32.4556	32.3568	32.3568	32.1483	32.6437	32.4007	32.2308
	0.0216012	0.013394	P82979	SAP domain-containing ribonucleoprotein	SARNP	8	8	39.5	23.671	50.836	29.4995	29.0243	29.0531	29.4765	29.1189	29.0217	29.1189	28.7988	29.3217	28.3494	NaN	28.4707
	0.0193265	0.0134449	Q9HAV0	Guanine nucleotide-binding protein subunit beta-4	GNB4	13	8	65.3	37.567	201.73	29.4881	29.1771	29.0453	29.5646	29.2803	28.906	28.5969	28.4314	28.3951	29.4765	29.0889	28.9117
	0.0547501	0.0135536	Q12765	Secernin-1	SCRN1	11	11	39.9	46.382	47.158	29.8218	30.0479	30.0084	29.8755	30.0084	30.0349	30.0479	30.1842	30.1604	30.4334	30.341	30.1361
	0.0742695	0.0136064	O60508	Pre-mRNA-processing factor 17	CDC40	9	9	18.5	65.521	21.05	27.0914	27.2262	27.2714	27.2353	27.141	27.2535	NaN	26.3811	NaN	NaN	25.8385	NaN
	0.0963467	0.0138105	Q15185	Prostaglandin E synthase 3	PTGES3	8	8	50	18.697	286.75	32.2478	32.3276	32.3436	32.2365	32.3594	32.3646	32.196	32.3061	32.0512	32.2393	32.1052	31.9916
	0.0299317	0.0141691	Q96T76	MMS19 nucleotide excision repair protein homolog	MMS19	21	21	37.4	113.29	139.39	29.5555	29.1842	29.0686	29.3515	29.3388	29.1604	29.7973	29.8324	29.579	28.8019	29.604	29.4374
	0.0534119	0.014267	Q9BSJ2	Gamma-tubulin complex component 2	TUBGCP2	12	12	19.1	102.53	39.882	26.3926	26.1546	26.2661	26.3844	26.1738	26.2979	27.141	27.3662	27.5165	27.141	26.965	26.9428
	0.0595111	0.014382	Q8N3C0	Activating signal cointegrator 1 complex subunit 3	ASCC3	9	9	5.7	251.46	13.35	26.239	26.3511	26.189	26.3975	26.1604	26.2643	26.2151	26.3427	26.1738	NaN	26.0567	NaN
	0.0712052	0.0144246	Q13247	Serine/arginine-rich splicing factor 6	SRSF6	7	6	23.5	39.586	17.221	29.7064	29.8974	29.8916	29.8218	29.9117	29.805	29.099	29.4649	29.4214	29.9539	29.3662	29.6198
	0.250929	0.0148595	Q15437	Protein transport protein Sec23B	SEC23B	22	19	44.9	86.478	214.22	30.2647	30.2869	30.2308	30.2647	30.2535	30.3088	30.4134	30.5109	30.4334	30.0349	30.0479	30.4032
	0.0924545	0.0148633	P49354	Protein farnesyltransferase/geranylgeranyltransferase type-1 subunit alpha	FNTA	8	8	31.9	44.408	32.868	27.1984	27.2714	27.1507	27.2262	27.2979	27.141	27.3828	27.1984	27.1015	26.632	27.1015	26.8974
	0.0406212	0.0148633	Q92541	RNA polymerase-associated protein RTF1 homolog	RTF1	6	6	9.3	80.313	7.8492	27.217	27.0401	27.3324	27.2979	27.0296	27.3066	26.2909	27.0401	26.5075	NaN	NaN	26.8504
	0.0360763	0.0149059	Q9H267	Vacuolar protein sorting-associated protein 33B	VPS33B	5	5	13.1	70.584	41.749	26.604	26.417	26.217	26.5754	26.2838	26.4234	NaN	NaN	NaN	NaN	NaN	NaN
	0.0935245	0.0149447	Q7KZF4	Staphylococcal nuclease domain-containing protein 1	SND1	48	48	65.3	102	323.31	33.6522	33.7849	33.8328	33.7353	33.7849	33.7946	33.9063	33.9677	33.9677	33.9063	33.7849	33.9063
	0.085962	0.0151386	Q8IUD2	ELKS/Rab6-interacting/CAST family member 1	ERC1	11	10	14.4	128.08	102.28	27.5165	27.3828	27.4314	27.3662	27.5315	27.4785	28.1263	28.1556	28.0505	28.4394	28.0864	27.8974
	0.0573698	0.0151431	P46459	Vesicle-fusing ATPase	NSF	23	23	36.6	82.593	106.74	29.7437	29.8697	29.995	29.7895	29.8829	29.9814	30.0349	29.8474	29.8785	30.3088	29.8564	29.6831
	0.0334533	0.0151628	Q96HS1	Serine/threonine-protein phosphatase PGAM5, mitochondrial	PGAM5	13	13	50.2	32.004	25.668	29.2602	29.099	29.2077	29.2602	28.9287	29.4234	29.7755	30.2869	29.7818	30.3303	30.0084	29.6372
	0.0657575	0.0153847	P55072	Transitional endoplasmic reticulum ATPase	VCP	57	57	76.6	89.321	323.31	34.4823	34.5922	34.6944	34.5002	34.6361	34.6787	34.0832	34.1146	34.1453	34.1223	34.0832	34.0592
	0.0993374	0.0154648	P32969	60S ribosomal protein L9	RPL9	9	9	65.1	21.863	102.98	32.0544	31.8755	32.0184	31.9983	31.978	32.0184	31.9365	31.9814	32.0864	32.6671	32.2422	32.2619
	0.0449416	0.0157051	P61086	Ubiquitin-conjugating enzyme E2 K	UBE2K	12	12	74	22.406	46.589	30.0864	30.1361	30.362	30.0609	30.2193	30.3515	30.2759	30.1483	30.1842	30.2077	30.1239	30.1604
	0.0319013	0.0159003	Q8WVY7	Ubiquitin-like domain-containing CTD phosphatase 1	UBLCP1	9	9	27	36.804	13.944	27.7064	27.4394	27.6931	27.5463	27.4314	27.9088	27.7195	27.8019	27.7453	27.8974	27.9316	27.8682
	0.0270043	0.0159791	P04062	Glucosylceramidase	GBA	12	12	34.9	59.716	78.001	29.8415	29.524	29.57	29.3217	29.7818	29.8799	29.6713	29.6898	29.7676	NaN	29.7113	30.099
	0.0840784	0.0159988	Q15075	Early endosome antigen 1	EEA1	34	34	34.9	162.46	323.31	29.4532	29.3578	29.4093	29.5426	29.3388	29.3869	29.8974	29.8974	29.673	30.2647	29.7895	29.9117
	0.0338979	0.0161101	Q9P2J5	Leucine--tRNA ligase, cytoplasmic	LARS	47	47	49	134.46	295.63	32.0609	31.94	31.7731	32.1931	31.9081	31.7211	32.4823	32.3594	32.3542	32.5822	32.4007	32.2393
	0.0382948	0.0162741	P61081	NEDD8-conjugating enzyme Ubc12	UBE2M	4	4	25.1	20.9	9.9372	28.524	28.4073	28.8711	28.5536	28.6146	28.6831	28.524	28.8234	28.4707	28.0137	28.8203	28.8234
	0.0603897	0.0162818	Q13557	Calcium/calmodulin-dependent protein kinase type II subunit delta	CAMK2D	9	6	27.3	56.369	24.578	27.7833	27.5536	27.7453	27.604	27.7129	27.8142	27.4234	27.6931	NaN	27.8916	27.6527	27.3745
	0.0252777	0.0163123	Q92620	Pre-mRNA-splicing factor ATP-dependent RNA helicase PRP16	DHX38	23	23	26	140.5	70.662	29.3452	28.94	28.8741	29.3807	28.8653	28.9622	28.362	28.0914	28.5609	NaN	27.7195	28.2891
	0.100076	0.0164496	Q9Y3A5	Ribosome maturation protein SBDS	SBDS	15	15	64.8	28.763	192.63	29.9539	29.9677	29.9117	30.0737	29.9117	29.8974	30.0084	30.2422	30.1361	30.8004	30.4727	30.2193
	0.0353208	0.0165049	Q96G03	Phosphoglucomutase-2	PGM2	19	19	34.8	68.283	78.29	29.7645	30.0349	30.1239	29.7629	30.0737	30.1361	30.5109	30.4134	30.341	30.4727	30.5664	30.4629
	0.0777296	0.0168273	P52907	F-actin-capping protein subunit alpha-1	CAPZA1	14	12	71.3	32.922	323.31	32.1753	32.2365	31.9882	32.1724	32.1574	32.1208	31.9609	31.9916	31.9259	32.1544	32.1513	32.015
	0.0268026	0.0169156	Q15149	Plectin	PLEC	108	105	33.2	531.78	323.31	31.6839	31.9295	32.1208	31.6285	31.94	32.2164	32.0737	32.0609	32.0864	32.4702	32.2478	32.3142
	0.0396814	0.0169341	Q14696	LDLR chaperone MESD	MESDC2	9	9	48.3	26.076	94.502	30.5109	30.8901	30.8081	30.5933	30.8974	30.7692	29.8127	29.7818	29.7437	29.8785	30.0217	29.94
	0.0747034	0.0171878	P07814	Bifunctional glutamate/proline--tRNA ligase;Glutamate--tRNA ligase;Proline--tRNA ligase	EPRS	68	68	57.8	170.59	323.31	34.0184	33.9677	33.8974	34.0911	34.0017	33.8422	33.9063	33.8138	33.7653	34.0017	33.7653	33.6088
	0.0400171	0.017278	P78330	Phosphoserine phosphatase	PSPH	8	8	52.9	25.007	38.601	28.906	28.6697	29.094	28.8504	28.805	29.066	29.2602	29.0914	29.2239	29.5203	28.995	29.3196
	0.0797523	0.0173009	P20618	Proteasome subunit beta type-1	PSMB1	12	12	58.5	26.489	125.49	31.4284	31.341	31.5062	31.341	31.4384	31.5481	31.6242	31.6066	31.393	32.015	31.8719	31.5754
	0.0322006	0.0174847	P05534;P30447	HLA class I histocompatibility antigen, A-24 alpha chain;HLA class I histocompatibility antigen, A-23 alpha chain	HLA-A	15	4	48.5	40.688	323.31	29.1459	28.9316	28.7927	29.094	29.1556	28.673	30.9188	31.3776	30.0084	31.2308	31.1239	30.2535
	0.0165182	0.0174936	P63279	SUMO-conjugating enzyme UBC9	UBE2I	13	13	79.1	18.007	70.63	31.4483	30.6629	31.3033	31.4384	30.6458	31.3828	31.1361	30.8157	30.9677	31.2703	30.947	31.1422
	0.0719378	0.0176004	P29218	Inositol monophosphatase 1	IMPA1	11	11	44.8	30.188	120.23	29.8608	29.9259	30.0479	29.8309	30.0217	30.0349	30.196	30.2535	29.9814	30.1604	30.2077	29.94
	0.0689958	0.0176303	P07737	Profilin-1	PFN1	11	11	92.1	15.054	117.18	34.7946	34.87	35.0308	34.809	34.9975	34.9417	34.9153	34.715	34.78	35.3135	34.9461	34.8281
	0.0405694	0.0176671	P27824	Calnexin	CANX	28	28	46.1	67.567	323.31	34.0266	33.7553	33.7047	33.9848	33.9242	33.6307	33.8516	34.0266	33.8883	33.8042	34.0753	33.8138
	0.020003	0.0177066	P32322	Pyrroline-5-carboxylate reductase 1, mitochondrial	PYCR1	11	10	42.6	33.36	176.95	29.5071	29.0479	29.0889	29.7178	29.1288	28.8504	30.7047	30.947	30.7211	30.7849	30.995	30.933
	0.057237	0.0177981	Q9BRK5	45 kDa calcium-binding protein	SDF4	13	13	53	41.806	65.124	29.459	29.3324	29.2422	29.5033	29.3807	29.203	29.094	29.2239	29.0479	29.2847	29.2007	29.3452
	0.0631504	0.0179043	Q13242	Serine/arginine-rich splicing factor 9	SRSF9	10	10	44.8	25.542	20.263	30.1604	29.995	30.1483	30.1361	29.9677	30.2535	30.3515	30.362	30.4234	30.8608	30.4727	30.4532
	0.0510908	0.0179539	Q96K76	Ubiquitin carboxyl-terminal hydrolase 47	USP47	30	30	32.7	157.31	148.35	28.4274	28.1652	28.0505	28.1747	28.1984	28.3239	29.2467	29.1795	29.1795	28.49	28.9869	28.8474
	0.0881292	0.0179571	P41214	Eukaryotic translation initiation factor 2D	EIF2D	8	8	26.9	64.706	58.041	27.6527	27.4629	27.4314	27.5682	27.4938	27.5389	27.1312	26.7517	26.7771	27.0813	26.7517	27.1015
	0.0257936	0.0180721	P54753	Ephrin type-B receptor 3	EPHB3	20	14	30.4	110.33	134.43	28.2353	28.805	28.3196	28.1842	28.7096	28.5203	28.2535	28.258	27.8858	28.9567	28.7895	28.3153
	0.0477771	0.0181122	Q15386	Ubiquitin-protein ligase E3C	UBE3C	14	14	21.3	123.92	57.427	27.3992	27.7645	27.6389	27.509	27.5898	27.7581	28.0711	27.8324	27.6595	NaN	27.2891	27.6931
	0.0871997	0.0182285	Q14738	Serine/threonine-protein phosphatase 2A 56 kDa regulatory subunit delta isoform	PPP2R5D	19	13	40	69.991	67.099	28.9622	29.0164	28.965	29.0003	29.1239	28.8741	29.4032	29.4532	29.509	29.5444	29.114	29.3367
	0.0288899	0.0184848	O60271	C-Jun-amino-terminal kinase-interacting protein 4	SPAG9	23	21	28.2	146.2	73.771	29.0164	29.4823	29.3683	28.9896	29.4032	29.5296	28.5609	28.6424	28.3828	28.5426	28.3367	28.5315
	0.0757688	0.0185057	Q15645	Pachytene checkpoint protein 2 homolog	TRIP13	19	19	54.2	48.55	70.691	30.3724	30.4629	30.2979	30.3303	30.5389	30.3196	29.843	29.5296	30.0479	27.726	29.4314	29.611
	0.0701407	0.0187639	Q14677	Clathrin interactor 1	CLINT1	11	11	24.5	68.259	43.632	29.0505	28.8504	28.9705	29.0889	29.0003	28.8385	28.7833	28.9174	28.9316	28.9869	28.6424	28.94
	0.175607	0.0188986	Q8N1G4	Leucine-rich repeat-containing protein 47	LRRC47	18	18	48.5	63.472	171.52	30.3828	30.2869	30.2535	30.3088	30.3196	30.3515	30.393	30.4334	30.4234	30.9045	30.4532	30.4433
	0.0837207	0.0190055	Q86TI2	Dipeptidyl peptidase 9	DPP9	18	18	25.6	98.262	30.556	28.3787	28.2714	28.5426	28.3869	28.4394	28.4234	28.6146	28.5426	28.4354	28.8711	28.1984	28.4234
	0.045463	0.0191987	O75832	26S proteasome non-ATPase regulatory subunit 10	PSMD10	7	7	42.5	24.428	63.443	30.2979	30.2979	30.0864	30.3828	30.362	29.995	30.2535	30.4134	30.0349	30.5109	30.3515	30.2422
	0.0763422	0.0192197	Q9Y5K5	Ubiquitin carboxyl-terminal hydrolase isozyme L5	UCHL5	12	12	47.1	37.606	44.506	29.2285	28.9896	29.0531	29.1507	29.1724	29.0057	28.6964	28.5573	28.6697	NaN	28.3787	28.5315
	0.0328235	0.0203152	Q9NR31	GTP-binding protein SAR1a	SAR1A	10	7	70.7	22.367	319.46	31.0349	31.5435	31.3724	31.0479	31.5156	31.4483	31.5933	31.4775	31.4678	29.8385	31.1604	31.5014
	0.0477577	0.0205657	Q9Y3T9	Nucleolar complex protein 2 homolog	NOC2L	7	7	9.9	84.918	10.512	27.189	26.8974	26.9539	27.2445	26.8385	27.019	26.3943	26.6865	26.53	NaN	26.632	26.7389
	0.067004	0.0209834	Q6PJG6	BRCA1-associated ATM activator 1	BRAT1	14	14	27.3	88.118	36.543	27.8564	27.7325	27.632	27.7895	27.8974	27.5969	27.5463	27.2445	27.7833	NaN	27.2445	27.4314
	0.254427	0.021066	P54578	Ubiquitin carboxyl-terminal hydrolase 14	USP14	27	27	64.2	56.068	323.31	31.196	31.2979	31.2814	31.2703	31.2979	31.2703	31.0349	30.933	31.015	30.8974	30.9259	30.9882
	0.102389	0.0210991	P33176	Kinesin-1 heavy chain	KIF5B	40	32	52.9	109.68	323.31	31.901	31.995	32.08	31.9295	32.1115	31.9983	32.0316	32.1146	31.978	32.1177	31.9295	31.8347
	0.0686473	0.0212606	Q12904	Aminoacyl tRNA synthase complex-interacting multifunctional protein 1;Endothelial monocyte-activating polypeptide 2	AIMP1	14	14	63.5	34.352	118.03	31.0927	31.0479	30.8901	31.196	31.0084	30.8901	30.8534	30.9117	30.947	30.947	30.8829	30.7211
	0.203725	0.021567	O43242	26S proteasome non-ATPase regulatory subunit 3	PSMD3	21	21	48.1	60.977	189.16	31.5664	31.5527	31.5481	31.4967	31.6242	31.611	31.5889	31.6713	31.5389	32.0705	31.8081	31.6798
	0.0483035	0.0217864	Q12996	Cleavage stimulation factor subunit 3	CSTF3	12	12	23.8	82.921	35.15	27.8385	27.8324	28.2262	27.9977	27.8385	28.1263	27.6798	27.3494	27.5463	27.4394	27.8858	NaN
	0.0990186	0.0218232	Q13561	Dynactin subunit 2	DCTN2	14	14	49.1	44.23	90.192	30.995	30.9259	30.9188	30.8385	31.099	30.9677	31.0017	30.9539	30.9677	31.3196	30.8004	30.7533
	0.148891	0.0218328	O43290	U4/U6.U5 tri-snRNP-associated protein 1	SART1	14	14	24.4	90.254	90.939	28.9705	28.8385	28.8385	28.9622	28.8504	28.9002	28.1795	28.2759	28.4274	NaN	28.2216	28.5426
	0.058387	0.0218538	Q8IZL8	Proline-, glutamic acid- and leucine-rich protein 1	PELP1	14	14	21.2	119.7	95.345	28.6458	28.4629	28.5128	28.7486	28.3452	28.5933	29.1556	28.8203	29.267	27.4629	28.877	29.2123
	0.0864085	0.0219727	P60891	Ribose-phosphate pyrophosphokinase 1	PRPS1	11	3	46.2	34.834	34.171	27.9259	27.8324	27.9977	27.9705	27.7958	28.0557	28.0557	28.1507	28.0349	28.5426	28.249	28.1115
	0.186899	0.0222225	P06493	Cyclin-dependent kinase 1	CDK1	18	16	70	34.095	106.08	31.5343	31.4581	31.4334	31.5481	31.5109	31.4334	30.8157	30.8081	31.015	30.1361	30.4234	30.7047
	0.0879002	0.0223026	Q86U42	Polyadenylate-binding protein 2	PABPN1	7	7	46.1	32.749	51.331	28.8945	28.8112	29.0583	28.9287	28.8593	29.0427	28.8945	29.1312	29.203	29.0322	28.9372	29.0479
	0.0448032	0.022316	Q9BRX5	DNA replication complex GINS protein PSF3	GINS3	7	7	41.7	24.534	122.27	28.0557	27.5389	27.7195	27.9203	27.6527	27.8081	27.4707	26.9428	27.3992	27.9814	26.8858	27.4707
	0.0518833	0.0224965	P45877	Peptidyl-prolyl cis-trans isomerase C	PPIC	3	3	14.6	22.763	4.9652	25.8101	25.7619	25.7517	25.5045	25.9043	25.9825	25.4923	NaN	NaN	25.9203	26.1681	NaN
	0.106709	0.0225824	Q13573	SNW domain-containing protein 1	SNW1	14	14	35.6	61.494	60.127	28.6005	28.7129	28.5426	28.7162	28.6798	28.5278	28.4354	28.217	28.55	28.3536	27.726	28.3109
	0.114168	0.0226084	O75436	Vacuolar protein sorting-associated protein 26A	VPS26A	17	15	62.1	38.169	305.65	30.362	30.2308	30.1842	30.3724	30.2647	30.2077	30.3303	30.4134	30.2869	30.5296	30.2979	30.099
	0.149968	0.022768	O75396	Vesicle-trafficking protein SEC22b	SEC22B	8	8	39.1	24.593	158.6	30.2979	30.1604	30.2193	30.1724	30.3088	30.2647	30.0609	30.1115	30.099	30.3303	30.2077	29.9117
	0.0966453	0.0228558	P20340;Q9NRW1	Ras-related protein Rab-6A;Ras-related protein Rab-6B	RAB6A;RAB6B	8	7	38.5	23.593	35.821	31.8347	32.0283	31.9916	31.8571	32.0576	32.0084	32.0769	32.2164	31.978	32.3776	32.0927	31.933
	0.154379	0.0229193	P54687	Branched-chain-amino-acid aminotransferase, cytosolic	BCAT1	8	8	34.7	42.966	39.852	30.2647	30.2193	30.1361	30.2647	30.2759	30.1483	30.393	30.2647	30.9117	30.2647	29.7942	30.3088
	0.0807403	0.0231094	Q9UK59	Lariat debranching enzyme	DBR1	15	15	36.8	61.554	38.244	29.7927	29.524	29.7629	29.8218	29.6881	29.6389	29.5296	29.4746	29.6407	29.9117	29.6848	29.726
	0.155501	0.0234985	Q9Y3I0	tRNA-splicing ligase RtcB homolog	RTCB	21	21	49.3	55.21	312.42	31.8974	31.9295	32.0084	31.8974	31.9539	32.0544	31.6415	31.5978	31.4083	31.9224	31.7006	31.6923
	0.139319	0.0235341	Q9NXV6	CDKN2A-interacting protein	CDKN2AIP	9	9	25.7	61.124	97.553	27.2535	27.0711	27.141	27.1214	27.2353	27.1795	27.6798	27.5969	27.5463	NaN	NaN	27.5165
	0.0703503	0.023606	P62249	40S ribosomal protein S16	RPS16	9	9	54.1	16.445	19.074	31.9746	31.8719	32.0769	31.8004	32.0576	32.1361	31.4234	31.5014	31.6964	32.5132	31.995	32.0316
	0.0499321	0.0236759	P55769	NHP2-like protein 1;NHP2-like protein 1, N-terminally processed	NHP2L1	7	7	53.1	14.173	65.078	31.1483	30.9814	30.947	31.3303	30.8157	31.0017	30.6964	30.5109	30.7692	31.3879	30.7292	30.9539
	0.0474473	0.0237821	Q92979	Ribosomal RNA small subunit methyltransferase NEP1	EMG1	6	6	34.8	26.72	14.13	28.4707	28.1556	28.4274	28.5463	28.0965	28.4823	27.6998	28.0137	28.1556	27.7453	27.9088	27.9869
	0.0506549	0.0240453	Q9UIA9	Exportin-7	XPO7	12	12	16.5	123.91	28.349	27.976	27.8974	27.673	27.8142	27.673	28.1312	28.141	28.3109	28.1164	28.4194	28.3153	28.0453
	0.149732	0.0240593	Q16401	26S proteasome non-ATPase regulatory subunit 5	PSMD5	22	22	56	56.195	91.764	31.2479	31.2924	31.4134	31.3463	31.2814	31.3982	32.2759	32.2842	32.1483	32.2759	32.3223	32.1331
	0.0554557	0.0242011	P61224;A6NIZ1	Ras-related protein Rap-1b;Ras-related protein Rap-1b-like protein	RAP1B	9	4	62	20.825	38.342	30.6022	30.8829	30.4433	30.6022	30.8234	30.5754	31.0217	31.2814	31.0609	31.3356	31.4919	31.225
	0.165424	0.0244916	Q13144	Translation initiation factor eIF-2B subunit epsilon	EIF2B5	15	15	30.5	80.379	99.112	29.2847	29.4727	29.3724	29.4194	29.4073	29.3766	29.6595	29.6561	29.6915	29.6781	29.6163	29.5463
	0.0739122	0.0246944	Q7Z3B4	Nucleoporin p54	NUP54	10	10	28.8	55.435	47.963	27.9372	28.0609	27.965	28.1795	28.0557	27.8019	28.258	28.1015	28.1115	28.9174	28.4551	28.341
	0.168374	0.02484	Q8N6H7	ADP-ribosylation factor GTPase-activating protein 2	ARFGAP2	9	8	23.8	56.72	93.516	28.0609	28.1214	28.2123	28.1065	28.2216	28.141	27.4629	NaN	28.3951	NaN	NaN	NaN
	0.03907	0.024917	Q96AG4	Leucine-rich repeat-containing protein 59	LRRC59	13	13	49.8	34.93	168.55	31.4384	31.1177	31.6501	31.2308	31.325	31.7252	30.4919	30.8974	30.947	31.3672	31.099	31.08
	0.132235	0.0249831	Q5GLZ8	Probable E3 ubiquitin-protein ligase HERC4	HERC4	9	9	15	118.56	27.02	27.0914	27.2891	27.0914	27.141	27.189	27.217	28.0813	28.0762	27.632	27.1015	27.5754	27.9539
	0.141621	0.0251967	Q9BS26	Endoplasmic reticulum resident protein 44	ERP44	17	17	58.9	46.971	143.01	30.7771	30.947	30.8234	30.7927	30.933	30.8974	32.1544	32.1753	31.9677	32.1483	32.4532	32.08
	0.107797	0.0252959	P62854;Q5JNZ5	40S ribosomal protein S26;Putative 40S ribosomal protein S26-like 1	RPS26;RPS26P11	3	3	31.3	13.015	10.619	31.1361	30.94	30.94	31.1052	31.0609	30.9259	30.4433	30.6022	30.6544	29.3848	30.4629	30.8901
	0.050974	0.0253245	Q9NYB0	Telomeric repeat-binding factor 2-interacting protein 1	TERF2IP	7	7	31.1	44.259	25.047	28.3109	28.1015	28.066	28.49	28.0243	28.0401	27.9372	27.9031	27.8682	NaN	27.9814	27.8916
	0.0884075	0.0255909	Q96KP1	Exocyst complex component 2	EXOC2	12	12	19.9	104.07	19.461	27.8081	27.7771	27.8564	27.6798	27.8142	28.0243	27.611	27.5969	27.7064	NaN	27.611	27.7195
	0.0896158	0.025636	P35080	Profilin-2	PFN2	3	3	26.4	15.046	4.7247	29.2123	29.2557	29.4032	29.2625	29.2054	29.4804	26.6181	29.5352	29.0111	NaN	NaN	NaN
	0.0622525	0.0257854	O75955	Flotillin-1	FLOT1	14	14	49.2	47.355	65.001	29.7833	29.4919	29.3869	29.7195	29.5826	29.4374	29.5862	29.8653	29.7146	30.4134	29.9677	30.0864
	0.0663671	0.0261707	P61457	Pterin-4-alpha-carbinolamine dehydratase	PCBD1	6	6	66.3	11.999	25.998	28.9203	29.2647	28.9869	28.965	29.2557	29.0296	29.1239	29.3324	28.7549	29.1312	29.2625	28.7549
	0.0934884	0.0263856	Q03252	Lamin-B2	LMNB2	32	29	51.5	69.948	116.62	31.1422	30.995	30.8974	31.1483	31.0609	30.9045	31.2479	31.2814	31.2869	31.3196	31.3724	31.5389
	0.111195	0.0264511	P60660	Myosin light polypeptide 6	MYL6	8	6	55.6	16.93	85.793	32.245	32.2647	32.4108	32.2048	32.3568	32.4384	32.4654	32.5412	32.5978	32.8347	32.8062	32.6022
	0.0469977	0.0265293	P49773	Histidine triad nucleotide-binding protein 1	HINT1	9	9	78.6	13.802	56.264	31.7252	31.3196	31.2814	31.7211	31.2814	31.4032	30.8004	30.4629	30.9188	NaN	30.196	31.1422
	0.0320049	0.0265547	O00468	Agrin;Agrin N-terminal 110 kDa subunit;Agrin C-terminal 110 kDa subunit;Agrin C-terminal 90 kDa fragment;Agrin C-terminal 22 kDa fragment	AGRN	17	17	15.7	217.32	40.821	26.5433	26.1623	26.3861	26.8741	26.2996	25.9977	27.7708	27.5969	26.9088	27.4154	27.5165	27.3324
	0.0512573	0.026652	Q15061	WD repeat-containing protein 43	WDR43	13	13	32.2	74.89	63.724	29.651	29.5147	29.6458	29.9539	29.362	29.5754	29.4804	29.3088	29.341	27.2353	29.4334	29.1628
	0.100784	0.026687	Q9H6Z4	Ran-binding protein 3	RANBP3	10	10	25.4	60.209	92.139	29.8142	29.6663	29.7276	29.8697	29.5951	29.8234	29.2759	29.0531	29.4174	28.7676	28.8741	29.1189
	0.0626289	0.0268517	Q15631	Translin	TSN	9	9	42.1	26.183	65.469	30.0084	29.6747	29.5052	29.7195	29.7723	29.7771	30.5296	30.5573	30.4032	30.4727	30.4134	30.2308
	0.0832956	0.0269477	O75369	Filamin-B	FLNB	57	45	31.9	278.16	163.29	29.9814	30.196	30.2193	30.0609	30.3303	30.0864	29.5951	29.6407	29.4746	29.9814	29.6865	29.7373
	0.0903078	0.0272236	P20645	Cation-dependent mannose-6-phosphate receptor	M6PR	5	5	25.3	30.993	7.8787	28.8829	28.9174	28.8858	28.8445	29.1337	28.7895	28.8829	29.2216	29.0349	28.9117	28.805	28.7676
	0.0377646	0.0273527	O95785	Protein Wiz	WIZ	9	9	9.7	178.67	73.264	26.5463	26.3342	26.2372	26.7895	26.4105	25.9996	27.0084	27.019	27.0505	NaN	26.8504	27.141
	0.086501	0.0275002	Q99417	C-Myc-binding protein	MYCBP	4	4	55.3	11.967	44.414	29.3828	29.1214	29.1288	29.362	29.109	29.2445	29.17	28.9203	29.4053	29.1628	28.995	28.8858
	0.218167	0.0278562	Q13148	TAR DNA-binding protein 43	TARDBP	10	10	36.5	44.739	70.408	30.5844	30.4629	30.5109	30.6022	30.4823	30.5573	30.2193	30.3828	30.3088	29.3683	30.196	30.4334
	0.0778357	0.0279026	P62906	60S ribosomal protein L10a	RPL10A	11	11	46.1	24.831	111.92	32.3672	31.9882	32.1931	32.1177	32.1842	32.3303	31.7333	32.375	32.4678	33.0592	32.8755	32.7129
	0.0491872	0.0279477	Q9Y2R9	28S ribosomal protein S7, mitochondrial	MRPS7	8	8	37.2	28.134	27.88	28.7739	28.2714	28.7357	28.7645	28.4073	28.6931	28.5609	28.6285	28.5352	29.0737	28.8294	28.9344
	0.1814	0.028127	O43719	HIV Tat-specific factor 1	HTATSF1	14	14	32.2	85.852	323.31	29.2847	29.2445	29.2512	29.267	29.2007	29.3971	28.94	28.7549	28.8623	28.1015	29.0084	29.1435
	0.261784	0.0284004	P45974	Ubiquitin carboxyl-terminal hydrolase 5	USP5	32	28	49.3	95.785	241.32	32.1694	32.1422	32.2507	32.2106	32.1694	32.2675	32.881	32.8919	32.8234	32.8571	32.8195	32.8553
	0.0769131	0.0289644	Q8IYI6	Exocyst complex component 8	EXOC8	11	11	25.5	81.798	19.334	27.7129	27.7453	27.965	28.003	27.6389	27.8682	27.6389	NaN	27.3662	NaN	NaN	NaN
	0.0873717	0.0290038	Q13451	Peptidyl-prolyl cis-trans isomerase FKBP5;Peptidyl-prolyl cis-trans isomerase FKBP5, N-terminally processed	FKBP5	13	13	39.6	51.212	72.146	29.5203	29.3599	29.21	29.5147	29.2512	29.4113	29.9117	30.0737	30.0217	30.1842	30.1115	30.2193
	0.163294	0.0291589	Q53GS9	U4/U6.U5 tri-snRNP-associated protein 2	USP39	14	14	35.9	65.38	81.919	29.995	29.9259	29.9814	29.94	29.9259	30.1239	29.509	29.7517	29.5916	29.5808	29.8264	29.7864
	0.030836	0.0292956	Q13542	Eukaryotic translation initiation factor 4E-binding protein 2	EIF4EBP2	4	4	73.3	12.939	14.749	28.5463	29.1288	28.4274	29.1842	28.3951	28.611	28.3745	NaN	NaN	NaN	NaN	NaN
	0.0643772	0.0293115	O75131	Copine-3	CPNE3	18	17	41	60.13	177.99	31.362	31.4134	31.7453	31.5754	31.341	31.6923	32.3196	32.375	32.3115	32.6066	32.3196	32.1931
	0.039048	0.0293293	Q9H173	Nucleotide exchange factor SIL1	SIL1	8	8	26	52.084	18.295	26.6595	26.3153	26.1814	26.8264	26.1234	26.2944	28.1065	28.1507	27.7389	28.3662	28.1015	27.5826
	0.0796673	0.0293414	O00193	Small acidic protein	SMAP	5	5	23	20.332	323.31	29.3023	29.4394	29.1628	29.5165	29.3131	29.1628	29.4957	29.4823	29.837	30.2535	29.7047	29.9539
	0.0689993	0.0293916	Q10471	Polypeptide N-acetylgalactosaminyltransferase 2;Polypeptide N-acetylgalactosaminyltransferase 2 soluble form	GALNT2	13	12	29.8	64.732	26.722	29.141	29.1747	28.9456	28.8564	29.2262	29.267	29.0164	29.0788	29.2216	28.8203	29.0531	29.0453
	0.083224	0.0299288	Q12788	Transducin beta-like protein 3	TBL3	15	15	29.5	89.034	159.84	29.0217	28.8019	28.673	29.0111	28.7581	28.8173	28.5203	28.7064	28.4433	28.632	28.7676	28.6898
	0.320686	0.0301959	P13489	Ribonuclease inhibitor	RNH1	22	22	77.2	49.973	284.66	31.9539	31.8937	32.005	31.9916	31.94	32.0117	32.8062	32.7888	32.8608	33.2019	32.8919	32.7888
	0.099366	0.0306091	P00441	Superoxide dismutase [Cu-Zn]	SOD1	6	6	63	15.936	132.18	31.1724	31.4083	31.5296	31.3515	31.4678	31.3828	30.393	30.2759	30.1483	28.6931	30.4433	30.5933
	0.141744	0.0309092	Q9NTJ3	Structural maintenance of chromosomes protein 4	SMC4	23	23	23.1	147.18	109.57	29.1913	29.1556	28.9923	29.2399	29.1337	29.0583	28.2399	28.3239	28.4314	28.203	27.8324	28.3196
	0.19632	0.0309207	P61201	COP9 signalosome complex subunit 2	COPS2	14	14	47.9	51.596	72.941	29.7292	29.8653	29.8945	29.8309	29.8249	29.9259	29.5109	29.7373	29.6058	29.7031	29.7708	29.5128
	0.190534	0.0311343	Q9NZT2	Opioid growth factor receptor	OGFR	12	12	27.2	73.324	173.41	29.0889	29.2602	29.1288	29.2602	29.1628	29.1483	28.258	28.1747	28.3109	28.5315	28.3662	28.1263
	0.0577111	0.031264	P22234	Multifunctional protein ADE2;Phosphoribosylaminoimidazole-succinocarboxamide synthase;Phosphoribosylaminoimidazole carboxylase	PAICS	20	20	57.6	47.079	323.31	33.0816	32.7633	32.7026	33.1649	32.7946	32.6819	33.1842	33.1916	33.1483	33.2759	32.8737	33.0134
	0.121411	0.0313403	Q13151	Heterogeneous nuclear ribonucleoprotein A0	HNRNPA0	12	12	50.5	30.84	132.38	31.2647	30.995	31.015	31.196	31.0927	31.08	30.8157	30.7211	30.8004	29.94	30.7453	30.5481
	0.241395	0.0313803	P28482	Mitogen-activated protein kinase 1	MAPK1	18	14	60.8	41.389	130.38	30.7849	30.8682	30.8682	30.8081	30.9539	30.8534	30.8081	30.8157	30.8829	30.7849	30.6881	30.6798
	0.0406753	0.0314013	O43809	Cleavage and polyadenylation specificity factor subunit 5	NUDT21	12	12	74.4	26.227	74.132	31.0864	30.5933	31.2422	31.08	30.6713	31.2647	30.4629	30.5754	30.4629	NaN	30.5933	30.7533
	0.0852635	0.0315959	P51659	Peroxisomal multifunctional enzyme type 2;(3R)-hydroxyacyl-CoA dehydrogenase;Enoyl-CoA hydratase 2	HSD17B4	26	26	49.5	79.685	209.44	30.8234	30.611	30.5014	30.8081	30.7211	30.5014	31.0609	30.8157	30.7129	31.4919	31.1604	31.015
	0.0655126	0.031702	P49441	Inositol polyphosphate 1-phosphatase	INPP1	12	12	39.3	43.998	68.335	28.8653	29.0164	28.805	29.0084	29.1483	28.6251	30.0737	30.099	30.2422	30.2535	30.1239	30.4433
	0.024064	0.0320117	Q8N987	N-terminal EF-hand calcium-binding protein 1	NECAB1	14	14	56.4	40.571	251.79	30.7292	31.1901	31.7006	30.5754	31.4032	31.7373	29.9814	29.995	29.8858	30.7771	30.2979	30.2979
	0.105378	0.0320428	Q06124	Tyrosine-protein phosphatase non-receptor type 11	PTPN11	20	20	47.2	68.436	43.487	29.708	29.5315	29.4314	29.6915	29.6303	29.4453	29.4274	29.4649	29.4765	29.5052	29.611	29.4012
	0.159995	0.0323105	P50851	Lipopolysaccharide-responsive and beige-like anchor protein	LRBA	26	26	13.2	319.1	154.27	27.726	27.7645	27.6458	27.8264	27.611	27.7958	29.0914	29.3001	28.5389	29.158	28.9088	28.5969
	0.192979	0.0327142	Q01130	Serine/arginine-rich splicing factor 2	SRSF2	6	6	25.8	25.476	158.5	31.0864	31.2135	31.2869	31.2759	31.1783	31.2308	30.947	30.8755	31.0217	31.4727	30.933	30.94
	0.0630412	0.0328554	Q9UNI6	Dual specificity protein phosphatase 12	DUSP12	5	5	26.2	37.687	17.904	26.8974	26.3662	26.5609	26.8264	26.5696	26.527	26.7895	26.976	26.7517	26.604	27.1214	26.7517
	0.0906004	0.032856	Q8IY67	Ribonucleoprotein PTB-binding 1	RAVER1	12	12	34.3	63.876	92.285	28.6964	28.6629	28.7739	28.9841	28.5646	28.6831	29.7146	29.7533	29.8309	29.8004	29.6646	29.9259
	0.107307	0.0328986	O75533	Splicing factor 3B subunit 1	SF3B1	48	48	51.3	145.83	323.31	32.2222	32.0217	32.0017	32.245	31.9539	32.1453	32.3061	32.2759	32.225	32.6132	32.463	32.3223
	0.21952	0.0333926	P23284	Peptidyl-prolyl cis-trans isomerase B	PPIB	17	17	60.2	23.742	77.647	33.6415	33.6629	33.7453	33.6307	33.8042	33.715	33.4702	33.5412	33.3568	33.8138	33.87	33.5641
	0.0864838	0.0334015	Q9UKD2	mRNA turnover protein 4 homolog	MRTO4	14	14	59	27.56	91.717	29.995	29.708	29.8608	30.099	29.8309	29.7341	29.2147	29.189	29.6058	28.5536	29.2781	29.4842
	0.0319802	0.0335045	O75746	Calcium-binding mitochondrial carrier protein Aralar1	SLC25A12	18	13	36.6	74.761	21.589	28.0296	27.9705	28.4194	27.5463	28.3452	28.6285	28.6181	28.9732	28.6146	29.3044	29.2445	29.2308
	0.0262428	0.0335833	Q5T7N3	KN motif and ankyrin repeat domain-containing protein 4	KANK4	18	18	34.5	107.34	191.02	28.9117	28.5969	27.9484	29.114	28.4354	28.0084	28.2979	27.9372	28.6964	27.6181	28.1795	28.1361
	0.114159	0.0336367	Q9H0A8	COMM domain-containing protein 4	COMMD4	6	6	48.7	21.764	121.3	27.7958	27.9814	28.0137	27.8203	28.1065	27.965	27.3828	27.019	27.2445	27.391	28.0609	NaN
	0.13765	0.033685	Q96AE4	Far upstream element-binding protein 1	FUBP1	20	17	41.1	67.56	221.16	32.0576	32.1269	32.3088	32.1115	32.196	32.2869	31.5889	31.6458	31.6756	31.9153	31.7849	31.7292
	0.0919083	0.0337232	O14980	Exportin-1	XPO1	39	39	45.4	123.38	270.95	31.8682	31.6501	31.4919	31.846	31.611	31.6544	31.9643	32.0447	31.9224	32.1453	32.1021	31.9983
	0.0574448	0.0337753	Q96RP9	Elongation factor G, mitochondrial	GFM1	15	15	23.7	83.471	27.734	27.9203	28.1361	28.4746	28.0401	28.141	28.4512	28.2891	28.3662	28.3239	29.0427	28.7292	28.4394
	0.126208	0.0340837	Q16181	Septin-7	2020-09-07	17	17	56.1	50.679	169.98	31.947	32.0832	32.1989	31.9848	32.1331	32.2135	31.7888	31.7333	31.8004	31.9117	31.7292	31.9259
	0.144667	0.0343068	O95630	STAM-binding protein	STAMBP	8	8	24.5	48.076	17.024	28.2077	28.4073	28.4113	28.2714	28.391	28.4668	28.3023	28.2077	28.2979	28.3704	28.49	28.4394
	0.123767	0.034448	Q9UL15	BAG family molecular chaperone regulator 5	BAG5	10	10	35.8	51.199	31.734	27.7895	28.0349	28.1115	27.9539	28.0557	28.0296	27.4314	27.5389	27.3745	27.3066	27.2979	27.4473
	0.130365	0.0347729	P39656	Dolichyl-diphosphooligosaccharide--protein glycosyltransferase 48 kDa subunit	DDOST	12	12	41	50.8	93.342	31.7771	31.5389	31.4919	31.6713	31.5527	31.6881	31.4871	31.6839	31.5664	31.8196	31.8004	31.7333
	0.0907349	0.0348962	Q9UPT5	Exocyst complex component 7	EXOC7	18	18	32.5	83.381	85.042	28.8829	28.9344	29.258	28.94	29.0557	29.1842	28.579	28.391	28.3828	NaN	28.49	28.4668
	0.0754585	0.035031	Q9BZD3;P0CAP2	Putative GRINL1B complex locus protein 2;DNA-directed RNA polymerase II subunit GRINL1A	GCOM2;POLR2M	5	5	24.5	41.712	85.584	25.7492	25.7821	26.1871	25.7796	26.0505	25.9933	NaN	NaN	NaN	NaN	NaN	NaN
	0.156259	0.0352472	P08621	U1 small nuclear ribonucleoprotein 70 kDa	SNRNP70	14	14	40.3	51.556	58.334	30.6713	30.7047	30.611	30.5389	30.7927	30.7613	30.3196	30.393	30.3303	31.1361	30.9188	30.6964
	0.0291441	0.0353298	Q9H1B7	Interferon regulatory factor 2-binding protein-like	IRF2BPL	11	9	20.9	82.658	24.721	26.1312	26.8142	27.1214	26.3477	26.5448	27.2803	26.1273	NaN	NaN	NaN	26.5898	NaN
	0.197504	0.0353769	P55735	Protein SEC13 homolog	SEC13	13	13	59.9	35.54	225.58	31.7047	31.6798	31.5754	31.6198	31.8004	31.6458	32.4259	32.3463	32.2731	32.3956	32.4058	32.3223
	0.0443329	0.0361176	P13987	CD59 glycoprotein	CD59	3	3	25	14.177	5.5047	28.0813	28.7453	28.258	28.1312	28.7771	28.2847	NaN	NaN	NaN	NaN	NaN	NaN
	0.233713	0.0365016	P19367	Hexokinase-1	HK1	31	27	42.6	102.48	240.76	31.4334	31.3088	31.2979	31.4629	31.3142	31.3724	31.099	31.1177	31.0283	31.6501	31.2869	31.2077
	0.0263297	0.0368894	Q15048	Leucine-rich repeat-containing protein 14	LRRC14	4	4	11.6	54.513	40.962	25.4953	25.4041	25.2821	24.5726	26.1732	25.5463	NaN	NaN	25.3877	NaN	25.239	NaN
	0.301175	0.036946	P25786	Proteasome subunit alpha type-1	PSMA1	15	15	71.5	29.555	169.64	31.4433	31.4967	31.4629	31.4433	31.5978	31.4727	31.7888	31.7652	31.4823	31.9643	31.781	31.6022
	0.439586	0.0371596	P51149	Ras-related protein Rab-7a	RAB7A	12	12	67.6	23.489	202.69	30.8081	30.8534	30.7927	30.8901	30.8829	30.7927	31.0864	31.225	31.0479	31.4032	31.2135	30.9188
	0.129915	0.0372327	P26038	Moesin	MSN	40	28	64.6	67.819	294.6	33.8234	34.13	34.0673	33.9763	34.1377	34.0184	33.7047	33.6307	33.6735	34.0349	33.7751	33.7553
	0.05445	0.0373046	O15212	Prefoldin subunit 6	PFDN6	4	4	32.6	14.582	99.613	29.189	28.8945	28.6663	29.2847	28.9174	28.6595	28.7096	28.9231	28.7708	29.2239	28.9484	28.7517
	0.225119	0.0373262	Q99805	Transmembrane 9 superfamily member 2	TM9SF2	12	12	24.7	75.775	57.008	30.1361	30.2193	30.2647	30.1483	30.2535	30.3303	30.611	30.6285	30.8004	30.6198	30.3828	30.8081
	0.0914003	0.0375125	Q6VN20	Ran-binding protein 10	RANBP10	7	7	20.5	67.256	29.41	27.341	27.217	27.0505	27.141	27.4785	27.1015	27.5014	NaN	27.5682	NaN	27.391	27.3745
	0.0479675	0.0376504	P50416	Carnitine O-palmitoyltransferase 1, liver isoform	CPT1A	12	12	18.8	88.367	28.033	28.4154	28.805	28.8593	28.2759	29.0137	28.9031	28.0243	28.2535	28.4668	28.8682	28.6424	28.9896
	0.185425	0.0377134	Q8WUM0	Nuclear pore complex protein Nup133	NUP133	20	20	24.2	128.98	68.346	29.3536	29.1866	29.3001	29.4174	29.326	29.21	29.0375	29.1984	29.362	NaN	29.1483	29.3828
	0.252478	0.0377528	Q08211	ATP-dependent RNA helicase A	DHX9	52	52	52.9	140.96	323.31	34.1679	34.0673	34.0673	34.2048	34.043	34.1679	34.0017	33.9933	34.0673	34.0673	34.0753	34.0911
	0.184743	0.0378227	P61981	14-3-3 protein gamma;14-3-3 protein gamma, N-terminally processed	YWHAG	18	14	74.9	28.302	148.37	32.686	32.8366	32.6198	32.8252	32.7593	32.6713	32.947	32.9487	32.978	33.3169	33.1315	32.8955
	0.285149	0.0378367	P06730	Eukaryotic translation initiation factor 4E	EIF4E	9	9	43.3	25.097	63.141	30.5014	30.341	30.3828	30.4919	30.4334	30.4134	30.8755	30.8755	30.7373	31.3303	31.0084	30.8901
	0.0941739	0.0379162	P33981	Dual specificity protein kinase TTK	TTK	8	8	13.9	97.071	26.829	27.0914	26.7771	26.604	26.8504	26.8385	26.8974	NaN	NaN	NaN	NaN	NaN	NaN
	0.124937	0.0383148	P19105;O14950	Myosin regulatory light chain 12A;Myosin regulatory light chain 12B	MYL12A;MYL12B	13	13	66.7	19.794	323.31	31.4775	31.5527	31.7252	31.525	31.5527	31.7927	31.7888	31.9224	31.9435	32.2135	31.9539	32.1513
	0.0958123	0.0384858	Q9H1P3	Oxysterol-binding protein-related protein 2	OSBPL2	6	6	21.7	55.201	22.09	26.4202	26.5551	26.7389	26.6998	26.7389	26.391	25.9338	25.767	NaN	NaN	NaN	NaN
	0.148844	0.0387026	Q99436	Proteasome subunit beta type-7	PSMB7	6	6	36.5	29.965	49.506	29.94	29.8112	30.099	29.9539	30.0864	29.9259	30.1115	30.0349	29.9259	NaN	30.0349	29.4234
	0.327783	0.038826	O75569	Interferon-inducible double-stranded RNA-dependent protein kinase activator A	PRKRA	9	9	41.5	34.404	77.224	29.1386	29.0788	29.0634	29.1507	29.0505	29.196	29.6612	29.6355	29.5147	29.5951	29.6578	29.9259
	0.120026	0.0390422	O15067	Phosphoribosylformylglycinamidine synthase	PFAS	36	36	46.2	144.73	323.31	32.2507	31.9916	32.0447	32.3115	32.0512	32.0414	32.3515	32.2924	32.2507	31.9677	32.1634	32.3115
	0.0903593	0.0390428	P29144	Tripeptidyl-peptidase 2	TPP2	40	40	43.8	138.35	259.48	30.9045	30.7849	30.6629	31.0349	30.8682	30.5664	31.3982	31.3982	31.3088	31.5203	31.3776	31.1544
	0.0741777	0.039065	P51572	B-cell receptor-associated protein 31	BCAP31	6	6	20.7	27.991	36.064	29.2353	28.7864	28.7958	29.189	28.9316	28.8142	28.8711	28.7517	28.8264	29.027	28.5718	28.7613
	0.309471	0.0392539	P37235	Hippocalcin-like protein 1	HPCAL1	10	8	57.5	22.313	150.31	28.7802	28.9512	28.8741	28.8858	28.9002	28.9372	29.7864	30.0217	30.0737	30.196	29.837	29.8096
	0.180008	0.0393912	Q8N7H5	RNA polymerase II-associated factor 1 homolog	PAF1	7	7	20.2	59.975	16.777	27.3662	27.141	27.2979	27.4073	27.2535	27.2625	26.7771	27.0813	27.0813	27.4551	27.1115	26.976
	0.283555	0.0395412	Q9UI10	Translation initiation factor eIF-2B subunit delta	EIF2B4	13	13	40.7	57.557	196.44	29.3066	29.2535	29.2847	29.3239	29.4134	29.2262	29.5627	29.4707	29.4668	29.5184	29.4093	29.4746
	0.104713	0.0395934	Q5T1M5	FK506-binding protein 15	FKBP15	17	17	23.5	133.63	175.66	27.9031	28.17	28.2123	27.9539	28.17	28.2803	29.0531	29.1288	29.0505	29.2123	28.9622	28.7739
	0.13057	0.0396042	P06756	Integrin alpha-V;Integrin alpha-V heavy chain;Integrin alpha-V light chain	ITGAV	20	20	26.2	116.04	126.83	28.8234	29.1239	28.9677	28.8741	29.104	29.0557	29.995	30.0217	29.8188	30.0609	29.9814	29.9814
	0.089489	0.0398661	P06733	Alpha-enolase	ENO1	25	22	73	47.168	301.49	35.5325	35.2157	35.0872	35.4763	35.3033	35.1753	35.0673	35.13	34.933	34.9417	35.0951	34.9548
	0.100703	0.0398954	Q8N201	Integrator complex subunit 1	INTS1	9	9	6.3	244.29	10.529	25.7312	25.8871	26.1015	25.7745	25.9694	26.0955	26.3444	25.9781	26.1371	NaN	26.5448	26.1253
	0.0657103	0.040048	P08758	Annexin A5	ANXA5	24	24	73.1	35.936	323.31	33.5867	33.9591	33.8608	33.4823	34.0512	33.9933	33.8138	33.7653	33.7047	33.9848	34.1223	33.8792
	0.204844	0.040053	O96008	Mitochondrial import receptor subunit TOM40 homolog	TOMM40	12	12	52.1	37.893	156.56	30.5296	30.3515	30.3724	30.5573	30.4234	30.393	30.2535	30.5203	30.4629	30.9882	30.7533	30.6285
	0.30133	0.0400569	P04406	Glyceraldehyde-3-phosphate dehydrogenase	GAPDH	18	18	75.2	36.053	323.31	36.7302	36.7428	36.8399	36.7428	36.8042	36.886	36.9086	36.9417	36.78	36.8399	36.9954	36.8631
	0.261448	0.0400976	Q15029	116 kDa U5 small nuclear ribonucleoprotein component	EFTUD2	43	42	60.5	109.43	323.31	32.2222	32.0895	32.099	32.2193	32.0895	32.2222	31.7373	31.7292	31.7006	32.1453	31.8119	31.8234
	0.269717	0.0403233	O43776	Asparagine--tRNA ligase, cytoplasmic	NARS	18	18	38.5	62.942	314.12	30.8309	30.7129	30.8004	30.9045	30.7373	30.8234	30.5844	30.5203	30.4823	30.6285	30.5296	30.4727
	0.0901557	0.0405547	Q9HAB8	Phosphopantothenate--cysteine ligase	PPCS	4	4	10.9	34.005	3.3639	26.9203	26.976	27.3153	26.9088	27.189	27.2353	27.524	27.5315	27.3066	27.2077	27.4785	27.4862
	0.218722	0.0408567	P43243	Matrin-3	MATR3	32	32	50.6	94.622	323.31	33.7353	33.5296	33.5978	33.7252	33.5867	33.6735	33.1916	33.1604	33.2897	33.5527	33.5062	33.3956
	0.0658071	0.040877	Q7L5D6	Golgi to ER traffic protein 4 homolog	GET4	9	9	35.2	36.504	15.529	27.141	27.5389	27.1604	27.4629	27.524	26.976	26.9539	26.9428	27.019	NaN	NaN	27.019
	0.34761	0.0410029	P25788	Proteasome subunit alpha type-3	PSMA3	8	8	33.3	28.433	17.065	30.3828	30.4727	30.3303	30.4334	30.4823	30.393	30.5933	30.5754	30.341	30.8608	30.5109	30.6022
	0.10144	0.0410245	Q00577	Transcriptional activator protein Pur-alpha	PURA	6	6	27.3	34.91	167.44	28.8653	28.7927	28.6764	29.0217	28.8711	28.5646	29.0864	29.2193	29.1819	29.7502	29.3153	29.0737
	0.246355	0.0410398	P55786	Puromycin-sensitive aminopeptidase	NPEPPS	38	38	52.8	103.28	225.11	31.933	32.0769	32.0217	31.9505	32.0927	32.1115	32.4108	32.4991	32.2924	32.6176	32.4408	32.2759
	0.788078	0.0410423	Q15233	Non-POU domain-containing octamer-binding protein	NONO	24	23	59.2	54.231	323.31	33.3956	33.4334	33.4334	33.4823	33.4823	33.4209	32.8176	32.781	32.9347	32.7868	32.8422	32.9188
	0.145024	0.0411263	P49643	DNA primase large subunit	PRIM2	7	7	17.9	58.805	10.661	26.9977	26.7771	27.019	26.9316	26.8741	27.1115	25.9781	26.275	26.527	NaN	26.2979	26.189
	0.120821	0.0413793	P27708	CAD protein;Glutamine-dependent carbamoyl-phosphate synthase;Aspartate carbamoyltransferase;Dihydroorotase	CAD	65	65	43.3	242.98	323.31	32.2647	32.0117	32.0544	32.3463	32.0447	32.0641	32.0381	31.8974	31.9365	31.5156	31.6964	31.6964
	0.0847028	0.041392	O14639	Actin-binding LIM protein 1	ABLIM1	9	9	19.9	87.687	36.107	27.5165	27.9203	27.5315	27.604	27.9203	27.5682	27.1795	NaN	27.6595	NaN	NaN	NaN
	0.106668	0.0415217	P14618	Pyruvate kinase PKM	PKM	38	37	76.8	57.936	323.31	35.9086	36.0017	36.212	35.9153	36.0471	36.2845	35.1938	35.1029	35.0266	35.3203	35.2193	34.9591
	0.078432	0.0415694	Q9P0T7	Transmembrane protein 9	TMEM9	3	3	32.8	20.574	17.703	27.524	27.7708	27.8623	27.4473	27.8974	27.9372	27.2979	27.4862	NaN	NaN	27.1984	26.4409
	0.158692	0.0417093	Q9GZL7	Ribosome biogenesis protein WDR12	WDR12	11	11	38.8	47.707	46.064	29.0375	28.9677	28.7739	29.0505	29.0003	28.8534	28.8264	28.7357	28.7708	29.0711	28.9231	28.6181
	0.11331	0.0420825	P13674	Prolyl 4-hydroxylase subunit alpha-1	P4HA1	29	29	59.6	61.049	280.35	32.3956	32.3515	32.1239	32.3303	32.5156	32.1513	32.9045	32.8627	32.5596	33.3169	33.1438	32.665
	0.14845	0.0422688	Q96JJ7	Protein disulfide-isomerase TMX3	TMX3	5	5	18.1	51.871	39.263	27.5826	27.3066	27.4938	27.3828	27.6181	27.509	27.0914	27.2353	27.2714	NaN	27.1312	26.9539
	0.175401	0.0424258	Q9Y3Y2	Chromatin target of PRMT1 protein	CHTOP	3	3	16.9	26.396	12.204	28.003	27.7325	27.9923	27.976	27.9031	27.976	27.5609	NaN	27.726	NaN	NaN	NaN
	0.634118	0.0424487	Q92945	Far upstream element-binding protein 2	KHSRP	28	26	55.3	73.114	323.31	32.9259	32.846	32.8497	32.9365	32.8865	32.9259	32.6285	32.6985	32.6307	32.555	32.5799	32.7088
	0.16446	0.0424709	Q9NVG8	TBC1 domain family member 13	TBC1D13	14	14	43.2	46.553	182.17	28.3578	28.49	28.6764	28.4938	28.5609	28.5969	29.651	29.6612	29.604	28.0864	29.3153	29.4473
	0.0805165	0.0426458	P07339	Cathepsin D;Cathepsin D light chain;Cathepsin D heavy chain	CTSD	17	17	47.6	44.552	131.08	31.7211	31.6923	31.947	31.4967	32.0447	31.947	31.717	31.5296	32.0479	32.5844	32.0381	32.7712
	0.297631	0.0426642	Q9Y5N5	HemK methyltransferase family member 2	N6AMT1	5	5	36.9	22.957	14.727	28.0296	28.0557	28.1361	28.189	28.1361	28.0243	27.4234	27.1507	27.5014	27.7453	27.189	27.5609
	0.130554	0.0428937	O00471	Exocyst complex component 5	EXOC5	11	11	23.4	81.852	45.442	28.1065	28.3951	28.3494	28.1652	28.3951	28.4194	27.1507	27.6998	27.8385	27.7645	27.6527	27.1312
	0.0653173	0.0431277	P56545	C-terminal-binding protein 2	CTBP2	9	5	23.8	48.944	44.698	28.4194	28.2714	28.1984	28.7739	28.0557	28.189	27.8081	27.9814	27.5682	NaN	28.1115	27.8974
	0.36495	0.0432765	P13010	X-ray repair cross-complementing protein 5	XRCC5	41	41	70.2	82.704	323.31	33.1709	33.0689	33.1068	33.2336	33.099	33.1438	33.2336	33.1724	33.1798	33.3698	33.2164	33.3303
	0.369061	0.0436064	Q08945	FACT complex subunit SSRP1	SSRP1	20	20	33.3	81.074	88.824	31.0084	30.9539	30.9609	31.0737	30.9259	31.0544	30.6022	30.6458	30.6713	31.099	30.9188	30.947
	0.206042	0.04363	O00764	Pyridoxal kinase	PDXK	11	11	58	35.102	80.088	29.7421	29.7849	29.57	29.7645	29.8142	29.6492	29.4032	29.6663	29.104	29.5862	29.84	29.3515
	0.227606	0.0438315	Q9Y263	Phospholipase A-2-activating protein	PLAA	26	26	47	87.156	149.37	30.1239	30.2869	30.3724	30.341	30.2759	30.2979	29.9677	29.94	30.0349	29.8081	29.9117	29.6948
	0.603392	0.0439949	P52306	Rap1 GTPase-GDP dissociation stimulator 1	RAP1GDS1	25	25	50.4	66.316	113.15	29.7942	29.8279	29.8294	29.8974	29.8858	29.8004	30.6372	30.6458	30.5481	30.7129	30.4629	30.2647
	0.62412	0.0442384	Q8IX01	SURP and G-patch domain-containing protein 2	SUGP2	18	18	31.1	120.21	88.559	28.6181	28.5898	28.5203	28.6216	28.6424	28.5969	29.2353	29.2467	29.2759	28.0557	29.3282	29.3431
	0.147206	0.0444851	Q10713	Mitochondrial-processing peptidase subunit alpha	PMPCA	14	14	35.4	58.252	31.031	29.1795	28.8741	29.1507	29.217	29.0965	29.0243	28.9428	28.7517	29.2979	28.976	29.1724	29.3848
	0.132376	0.0444914	Q9Y2X3	Nucleolar protein 58	NOP58	19	19	46.7	59.578	60.98	30.4032	29.9814	30.2535	30.2647	30.2422	30.2647	29.5315	30.0349	30.1604	30.4032	30.1604	30.2979
	0.135564	0.0445213	P53384	Cytosolic Fe-S cluster assembly factor NUBP1	NUBP1	7	7	43.8	34.534	28.664	27.6181	27.9372	27.8142	27.6798	27.8974	27.9259	27.9595	27.611	27.4473	27.6931	28.1214	27.8081
	0.165502	0.0445251	P11717	Cation-independent mannose-6-phosphate receptor	IGF2R	78	78	45.2	274.37	323.31	33.8328	33.9417	33.7252	33.8234	34.0349	33.7751	33.4458	33.5062	33.5754	33.4334	33.3698	33.4943
	0.148042	0.0445283	P98175	RNA-binding protein 10	RBM10	13	12	25.6	103.53	129.74	28.249	28.189	28.2123	28.4785	28.189	28.1164	28.1604	28.2979	28.1604	NaN	27.9869	28.258
	0.361278	0.0449212	Q9NYU2	UDP-glucose:glycoprotein glucosyltransferase 1	UGGT1	55	53	50.4	177.19	224.72	31.4581	31.5296	31.3982	31.4871	31.5754	31.4581	32.6372	32.6176	32.5435	32.8195	32.6415	32.5889
	0.707735	0.0450452	P52272	Heterogeneous nuclear ribonucleoprotein M	HNRNPM	33	33	60.5	77.515	192.02	33.1099	33.0911	33.0753	33.1269	33.0958	33.1887	32.7965	32.5014	32.8215	32.3463	32.648	32.6923
	0.0703767	0.0451215	P09382	Galectin-1	LGALS1	9	9	86.7	14.716	176.84	34.1679	34.4763	34.6415	34.1223	34.6735	34.6253	34.1828	34.0911	34.1453	33.8138	34.3033	34.1975
	0.0531954	0.0451927	Q68E01	Integrator complex subunit 3	INTS3	8	8	11.8	118.07	105.73	27.9316	27.189	27.1312	27.7195	27.4234	27.2445	27.3066	27.2353	27.3324	28.0505	27.4394	27.3153
	0.75675	0.0451978	Q9BTW9	Tubulin-specific chaperone D	TBCD	24	24	33.6	132.6	90.717	29.7818	29.7549	29.6931	29.7958	29.7973	29.7723	29.3869	29.5033	29.1164	29.7113	29.6798	29.0164
	0.211541	0.045351	P20674	Cytochrome c oxidase subunit 5A, mitochondrial	COX5A	8	8	58	16.762	22.246	31.0609	31.015	30.8901	31.1604	31.0017	30.94	30.8974	30.7211	30.6629	30.5754	30.7047	30.8608
	0.120774	0.0455519	P61964	WD repeat-containing protein 5	WDR5	6	6	28.4	36.588	18.004	28.7031	28.5203	28.8887	28.6458	28.6798	28.9231	28.4394	28.8294	28.5352	29.4354	29.3431	29.114
	0.24783	0.0455818	Q16630	Cleavage and polyadenylation specificity factor subunit 6	CPSF6	7	7	18.7	59.209	26.166	29.6578	29.6814	29.6424	29.7549	29.5646	29.7988	29.7565	29.8279	29.5315	30.196	31.0217	29.6475
	0.103924	0.0456136	Q14692	Ribosome biogenesis protein BMS1 homolog	BMS1	12	12	15.1	145.81	30.192	27.8916	27.8264	27.5463	28.0349	27.6798	27.6865	27.3239	27.6865	27.7771	27.3578	27.8324	27.7389
	0.227455	0.0456441	Q86WQ0	Nuclear receptor 2C2-associated protein	NR2C2AP	3	3	36.7	15.876	14.683	27.2445	27.2714	27.2979	27.4551	27.3066	27.189	NaN	NaN	NaN	NaN	27.341	27.2803
	0.13059	0.0458546	Q12768	WASH complex subunit strumpellin	KIAA0196	21	21	22.2	134.28	39.954	28.5463	28.3153	28.2935	28.3282	28.3324	28.632	28.8415	28.9287	28.9146	28.7802	28.9031	28.7802
	0.295874	0.0464554	P48637	Glutathione synthetase	GSS	15	15	38.8	52.384	71.723	29.4727	29.6441	29.604	29.5463	29.6629	29.651	29.6981	29.6764	29.3578	29.8355	29.673	29.391
	0.104311	0.0466741	O43747	AP-1 complex subunit gamma-1	AP1G1	20	20	34.5	91.35	151.87	29.5898	29.2781	29.1866	29.6005	29.3473	29.2467	29.8004	29.9539	29.8004	29.9677	29.7146	29.6251
	0.15021	0.046758	Q96PU8	Protein quaking	QKI	9	9	27.9	37.67	18.206	28.5646	28.8294	28.7895	28.8829	28.6146	28.8264	27.4473	27.6527	27.7581	28.4194	28.0243	27.8142
	0.108366	0.0468102	Q32MZ4	Leucine-rich repeat flightless-interacting protein 1	LRRFIP1	13	12	23.9	89.252	49.418	28.7031	28.9031	28.7129	28.8916	29.0217	28.5463	28.4234	NaN	28.4394	NaN	NaN	NaN
	0.0719109	0.0469513	P48163	NADP-dependent malic enzyme	ME1	24	24	60.7	64.149	323.31	32.1115	32.4134	32.6501	32.1052	32.5777	32.6329	29.8218	29.8339	30.1239	28.2759	29.6058	29.9677
	0.155927	0.0469869	Q15637	Splicing factor 1	SF1	15	15	33.6	68.329	96.623	30.4727	30.3515	30.3515	30.6285	30.4234	30.2647	30.4134	30.2535	30.3196	29.604	29.7629	30.2647
	0.264397	0.0471001	P09972	Fructose-bisphosphate aldolase C	ALDOC	16	11	54.4	39.455	216.49	32.8719	32.8792	32.686	32.87	32.9099	32.7985	32.9277	32.9746	32.6881	32.6176	32.8737	32.4507
	0.214438	0.0472921	Q96EK5	KIF1-binding protein	KIAA1279	9	9	26.4	71.813	33.178	29.2714	29.0914	29.0427	29.2825	29.1312	29.1337	28.6697	28.4354	28.5315	NaN	28.0557	27.5754
	0.136197	0.0474167	Q16795	NADH dehydrogenase [ubiquinone] 1 alpha subcomplex subunit 9, mitochondrial	NDUFA9	11	11	35.5	42.509	15.863	28.249	28.0813	28.3951	28.2803	28.1361	28.4512	27.8799	28.0084	28.0401	27.6389	28.141	28.4234
	0.12043	0.0476062	O60832	H/ACA ribonucleoprotein complex subunit 4	DKC1	14	14	34.8	57.673	75.897	30.2422	30.1842	30.0084	30.4433	30.0864	30.0479	30.0349	30.0737	30.2193	30.362	30.2759	30.4032
	0.271279	0.0476265	O14967	Calmegin	CLGN	5	5	19.3	70.038	25.944	28.0505	27.976	28.0762	28.003	28.0349	28.2077	NaN	NaN	NaN	NaN	NaN	NaN
	0.505041	0.0478096	Q9UMX0	Ubiquilin-1	UBQLN1	12	7	34.6	62.518	264.97	30.6798	30.6198	30.6022	30.7453	30.6713	30.6285	31.4581	31.4967	31.5435	31.0927	31.2814	31.3142
	0.114967	0.04787	Q15648	Mediator of RNA polymerase II transcription subunit 1	MED1	6	6	4.6	168.48	13.802	25.8191	26.17	25.9672	25.9248	25.918	26.2571	NaN	NaN	NaN	NaN	NaN	NaN
	0.113034	0.0478802	Q86VM9	Zinc finger CCCH domain-containing protein 18	ZC3H18	9	9	18.5	106.38	39.624	27.7771	27.673	27.7325	28.0762	27.611	27.6389	27.4394	27.6527	27.5389	NaN	NaN	27.8623
	0.568331	0.0479469	Q9BRP8	Partner of Y14 and mago	WIBG	7	7	54.4	22.655	65.027	27.524	27.604	27.5315	27.632	27.5463	27.6251	27.5969	27.4073	27.391	27.9428	27.5389	27.5536
	0.0480873	0.0479488	Q96GQ5	RUS1 family protein C16orf58	C16orf58	5	5	14.5	51.017	54.306	26.5671	25.586	26.3528	25.989	26.1174	26.5433	NaN	26.7645	26.189	26.9869	NaN	26.5898
	0.0963037	0.0481523	Q9UEY8	Gamma-adducin	ADD3	20	20	40.7	79.154	102.92	29.2007	29.3807	28.8504	29.1288	29.3662	29.0813	30.6629	30.6458	30.6881	30.9609	30.7533	30.6372
	0.150833	0.0481663	P80303	Nucleobindin-2;Nesfatin-1	NUCB2	13	13	36.9	50.222	71.501	29.393	29.5718	29.5718	29.6407	29.6848	29.3557	30.4334	30.393	30.2535	30.4629	30.4919	30.196
	0.155013	0.0483329	P84103	Serine/arginine-rich splicing factor 3	SRSF3	6	5	29.3	19.329	21.249	31.1361	30.9814	30.7533	31.0609	30.94	31.015	30.8309	31.1361	30.995	31.325	31.0217	30.846
	0.0801728	0.0484829	Q9P2R7	Succinyl-CoA ligase [ADP-forming] subunit beta, mitochondrial	SUCLA2	11	11	36.5	50.317	43.289	28.7988	28.4433	28.6595	29.0557	28.5014	28.49	30.0349	29.9117	30.0349	30.3088	30.2647	30.1842
	0.234805	0.0487862	Q9H0U4	Ras-related protein Rab-1B	RAB1B	13	6	70.6	22.171	172.46	32.3303	32.4581	32.555	32.4058	32.5754	32.5085	32.6777	32.8571	32.7868	32.9539	32.7946	32.7553
	0.17651	0.0490424	Q8IYB3	Serine/arginine repetitive matrix protein 1	SRRM1	6	6	10.3	102.33	244.27	29.94	29.7227	29.7849	29.995	29.7096	29.8901	30.0737	30.0349	29.9539	30.8081	30.4532	30.1724
	0.125115	0.0493202	O14744	Protein arginine N-methyltransferase 5;Protein arginine N-methyltransferase 5, N-terminally processed	PRMT5	13	13	32.5	72.683	38.798	29.7502	29.5916	29.3388	29.7453	29.6163	29.4668	29.1937	29.0686	29.2054	27.4707	28.8385	29.0164
	0.135495	0.0497958	Q9Y394	Dehydrogenase/reductase SDR family member 7	DHRS7	8	8	32.4	38.298	30.411	28.6663	28.2445	28.4823	28.5352	28.604	28.4032	28.604	28.8593	28.4785	29.4571	29.258	28.258
	0.270499	0.0498257	Q9BVK6	Transmembrane emp24 domain-containing protein 9	TMED9	7	6	29.8	27.277	113.31	30.1842	30.2979	30.2422	30.1604	30.3724	30.341	30.4334	30.4334	30.1239	30.1604	30.4234	30.2869
	0.690161	0.0499446	P27348	14-3-3 protein theta	YWHAQ	18	14	62.9	27.764	323.31	33.8608	33.933	33.9591	33.9417	33.9933	33.9677	33.7553	33.8328	33.6839	34.1753	33.8974	33.8042
	0.129918	0.0500196	Q15003	Condensin complex subunit 2	NCAPH	5	5	13.2	82.562	34.749	27.341	27.6998	27.611	27.4314	27.6251	27.7453	27.0401	NaN	27.4314	NaN	NaN	NaN
	0.0734423	0.0500209	P04216	Thy-1 membrane glycoprotein	THY1	4	4	24.8	17.935	35.866	32.0084	32.6264	32.3356	32.0673	32.6	32.4532	27.0609	27.0084	NaN	27.7325	NaN	NaN
	0.084803	0.0500736	Q9UHY7	Enolase-phosphatase E1	ENOPH1	6	6	33.3	28.932	30.38	28.9869	28.9117	28.7739	29.3367	28.7895	28.6964	29.2979	29.5463	29.3536	29.0243	29.5951	29.2557
	0.308598	0.0500787	P47985;P0C7P4	Cytochrome b-c1 complex subunit Rieske, mitochondrial;Cytochrome b-c1 complex subunit 11;Putative cytochrome b-c1 complex subunit Rieske-like protein 1	UQCRFS1;UQCRFS1P1	7	7	35	29.668	18.575	29.632	29.7849	29.8081	29.8519	29.7973	29.726	29.8279	30.0737	29.7162	30.3724	30.0737	29.9677
	0.055513	0.0503203	O60888	Protein CutA	CUTA	5	5	40.2	19.116	86.131	30.4134	30.1361	29.7453	30.611	30.0609	29.7739	31.4532	31.4775	31.3088	31.4967	31.3672	31.2924
	0.215015	0.0503661	Q9Y2V2	Calcium-regulated heat stable protein 1	CARHSP1	4	4	59.2	15.892	37.098	30.099	29.8504	29.8157	29.9539	30.0084	29.9539	30.5014	30.3196	30.8534	30.3828	30.2308	30.1361
	0.189872	0.0504004	Q9BZZ5	Apoptosis inhibitor 5	API5	15	15	35.5	59.004	204.32	31.2135	30.9609	30.9882	31.0737	31.015	31.225	30.7927	30.7129	30.9117	31.3515	30.9746	30.8901
	0.410994	0.0504487	Q9H4A3	Serine/threonine-protein kinase WNK1	WNK1	5	5	2.9	250.79	17.414	26.2481	26.0793	26.1253	26.2243	26.2021	26.1776	26.2445	26.1035	26.0296	26.1776	25.8552	26.1546
	0.113676	0.0505486	Q14257	Reticulocalbin-2	RCN2	13	13	53.9	36.876	307.86	32.393	32.4799	32.196	32.3879	32.6544	32.1783	31.6544	31.6458	31.8081	31.6022	31.611	31.8271
	0.168415	0.0505702	Q8NI36	WD repeat-containing protein 36	WDR36	8	8	10.9	105.32	18.181	27.4154	27.2979	27.3494	27.524	27.189	27.5014	27.0401	27.2445	NaN	NaN	NaN	27.2262
	0.0775413	0.0505975	P35226	Polycomb complex protein BMI-1	BMI1	3	3	15.3	36.949	6.1644	26.7517	26.8741	27.3153	26.7517	27.2803	27.0609	26.2874	NaN	26.726	NaN	NaN	27.0296
	0.0955601	0.0509173	Q6WCQ1	Myosin phosphatase Rho-interacting protein	MPRIP	25	25	36.3	116.53	147.39	28.9677	29.2957	29.4314	29.0243	29.3662	29.4571	29.4374	29.4314	29.7802	29.5664	29.5278	29.8142
	0.103501	0.0509726	P30533	Alpha-2-macroglobulin receptor-associated protein	LRPAP1	11	11	33.9	41.465	39.184	29.2445	29.1189	28.8234	29.2216	29.2557	28.8623	30.1115	30.0479	30.1239	29.4194	30.1239	29.893
	0.0420779	0.0510483	O94925	Glutaminase kidney isoform, mitochondrial	GLS	19	19	39	73.46	149.09	29.651	30.2647	30.5933	29.6233	30.393	30.6458	29.8901	30.2193	30.4334	28.965	30.3088	30.6713
	0.123838	0.0510674	O75787	Renin receptor	ATP6AP2	2	2	10.9	39.008	37.917	27.341	27.1312	26.8504	27.141	27.0813	27.2535	27.3494	27.4073	27.3662	NaN	27.2803	27.2445
	0.189717	0.0511328	Q9Y241	HIG1 domain family member 1A, mitochondrial	HIGD1A	3	3	52.7	10.143	19.109	27.7833	27.7581	27.8916	27.673	27.965	27.9484	NaN	NaN	27.7771	NaN	NaN	NaN
	0.193365	0.0513058	O00139	Kinesin-like protein KIF2A	KIF2A	11	10	19.3	79.954	36.943	27.7833	27.7195	27.7771	27.6865	27.7389	28.0084	27.5536	27.5315	27.3745	27.341	27.5165	27.5826
	0.072691	0.0514749	Q13867	Bleomycin hydrolase	BLMH	11	11	34.7	52.562	35.299	28.8653	28.6146	28.3745	28.9787	28.7453	28.2847	29.1866	29.2869	29.1015	29.4274	29.2285	29.1913
	0.0912799	0.0515582	O95394	Phosphoacetylglucosamine mutase	PGM3	17	17	47.2	59.851	57.304	30.2308	30.6881	30.6798	30.3196	30.6964	30.7373	30.1483	30.1115	30.0609	30.4919	30.2869	30.196
	0.13842	0.0516027	P13667	Protein disulfide-isomerase A4	PDIA4	46	45	63.9	72.932	323.31	34.5867	34.7302	34.4581	34.6033	34.8562	34.4702	34.8469	34.8928	34.9763	35.2724	35.1566	35.0872
	0.109698	0.0517101	P31146	Coronin-1A	CORO1A	9	9	27.8	51.026	22.093	29.114	28.8415	28.8385	29.2602	28.7771	28.9117	26.4738	27.3662	27.391	27.4154	27.2891	26.9316
	0.273389	0.0517756	Q07955	Serine/arginine-rich splicing factor 1	SRSF1	17	17	53.2	27.744	90.387	31.9677	32.0544	32.1574	32.2135	32.0381	32.0832	31.8385	31.978	31.8645	32.2842	32.0737	32.1177
	0.275094	0.0518519	Q9NQW7	Xaa-Pro aminopeptidase 1	XPNPEP1	26	26	59.9	69.917	275.53	32.5641	32.7088	32.5596	32.5844	32.7751	32.6285	32.5596	32.5618	32.5014	32.665	32.5319	32.4581
	0.261663	0.0520274	O14925;Q5SRD1	Mitochondrial import inner membrane translocase subunit Tim23;Putative mitochondrial import inner membrane translocase subunit Tim23B	TIMM23;TIMM23B	4	4	26.3	21.943	12.179	28.0137	27.9146	28.1015	27.9595	28.1604	28.066	27.9814	28.2077	28.1459	28.0243	NaN	27.8974
	0.0793256	0.0521889	Q9ULK4	Mediator of RNA polymerase II transcription subunit 23	MED23	12	12	11.5	156.47	24.3	26.7517	26.4488	26.604	26.7389	26.2463	26.976	26.4441	26.8623	25.8385	26.7771	26.4969	26.2803
	0.071813	0.0522073	O75063	Glycosaminoglycan xylosylkinase	FAM20B	3	3	13.4	46.432	9.0187	26.4923	26.0752	26.0042	26.6181	26.1946	25.9157	NaN	26.8264	26.6458	26.7771	26.604	26.7389
	0.192936	0.0523427	Q14232	Translation initiation factor eIF-2B subunit alpha	EIF2B1	11	11	44.3	33.712	51.708	29.5315	29.2422	29.3303	29.5222	29.4214	29.3174	30.2422	30.3515	30.1724	30.4823	30.3196	29.8112
	0.324231	0.0523618	Q9Y281	Cofilin-2	CFL2	13	9	73.5	18.736	87.968	30.2422	30.3088	30.3828	30.2647	30.3828	30.4433	30.4234	30.393	30.2193	30.9609	30.7613	30.4823
	0.293809	0.0526988	Q96KP4	Cytosolic non-specific dipeptidase	CNDP2	15	15	41.9	52.878	54.036	29.5259	29.389	29.4314	29.5916	29.3869	29.5259	30.3196	30.2422	30.1483	30.5573	30.2308	30.099
	0.0960861	0.0535475	P11586	C-1-tetrahydrofolate synthase, cytoplasmic;Methylenetetrahydrofolate dehydrogenase;Methenyltetrahydrofolate cyclohydrolase;Formyltetrahydrofolate synthetase;C-1-tetrahydrofolate synthase, cytoplasmic, N-terminally processed	MTHFD1	30	30	42.7	101.56	92.4	31.4581	31.2422	30.9746	31.5203	31.2869	31.0283	31.0673	31.0927	30.9677	31.1115	30.846	30.9746
	0.141848	0.0536016	Q9Y6F6	Protein MRVI1	MRVI1	8	8	12.6	97.929	33.964	25.8409	26.0691	26.2114	26.2225	25.9225	26.1371	27.1312	26.9203	27.2714	NaN	NaN	26.9316
	0.256453	0.0537434	P60900	Proteasome subunit alpha type-6	PSMA6	13	13	68.7	27.399	88.484	31.5527	31.7211	31.7888	31.6756	31.8271	31.7211	31.8422	31.7731	31.7088	31.901	31.8645	31.7088
	0.528105	0.0537643	Q14498	RNA-binding protein 39	RBM39	16	16	40.6	59.379	254.38	30.3303	30.362	30.393	30.4919	30.4032	30.3515	30.0609	29.8755	29.9539	30.196	30.0864	29.9117
	0.108148	0.0538203	Q96ST2	Protein IWS1 homolog	IWS1	8	8	9.8	91.954	13.346	27.0296	26.5898	26.7389	26.965	26.5898	26.965	27.0505	26.8858	27.2535	27.9869	27.1604	26.8142
	0.114324	0.0540702	O43676	NADH dehydrogenase [ubiquinone] 1 beta subcomplex subunit 3	NDUFB3	2	2	21.4	11.402	4.6517	27.189	26.8623	26.9088	27.2803	26.8019	27.0401	26.9539	27.0609	26.9316	NaN	27.2077	27.0609
	0.339625	0.0542316	P53367	Arfaptin-1	ARFIP1	9	9	41.6	41.738	96.713	28.604	28.5165	28.7096	28.604	28.6629	28.726	29.1263	29.1435	29.0583	28.4154	29.1507	29.019
	0.102128	0.0547358	P42785	Lysosomal Pro-X carboxypeptidase	PRCP	10	10	29	55.799	37.242	28.3494	28.5426	28.7517	28.362	28.5573	28.8887	29.8415	29.94	29.2376	30.2422	30.2308	29.8519
	0.173598	0.0549914	O75438	NADH dehydrogenase [ubiquinone] 1 beta subcomplex subunit 1	NDUFB1	4	4	36.2	6.9611	5.4943	27.5165	27.1312	27.4234	27.4154	27.3578	27.4629	27.2891	27.3828	27.2979	28.0137	27.509	27.5826
	0.156564	0.0550772	Q9H0L4	Cleavage stimulation factor subunit 2 tau variant	CSTF2T	9	4	33	64.436	239.78	26.5754	26.8142	26.7895	26.976	26.604	26.7645	26.9203	26.9869	26.8142	27.0609	NaN	27.0505
	0.252793	0.0551179	Q92688	Acidic leucine-rich nuclear phosphoprotein 32 family member B	ANP32B	9	7	33.9	28.787	148.59	31.2647	31.2422	31.196	31.3463	31.1239	31.3982	31.7771	31.6586	31.6756	31.6372	31.8608	32.025
	0.211321	0.0551758	P17174	Aspartate aminotransferase, cytoplasmic	GOT1	21	21	65.4	46.247	160.51	31.4581	31.1664	31.2535	31.4532	31.2924	31.2979	31.6154	31.2924	31.2365	31.362	31.2703	31.2479
	0.168978	0.055315	O76031	ATP-dependent Clp protease ATP-binding subunit clpX-like, mitochondrial	CLPX	13	13	31.6	69.223	47.673	28.0762	27.7453	28.0965	28.0453	27.9372	28.1015	NaN	27.5014	27.5826	27.8741	27.8799	27.7389
	0.113014	0.0553894	Q9HAU5	Regulator of nonsense transcripts 2	UPF2	8	8	9.1	147.81	17.975	25.4083	25.7568	25.6068	25.4676	25.5345	25.9361	26.1055	25.8528	25.4923	NaN	25.945	25.5667
	0.135274	0.0553913	Q9NXH9	tRNA (guanine(26)-N(2))-dimethyltransferase	TRMT1	3	3	9.4	72.233	9.9815	26.9316	26.6998	26.7517	27.1015	26.8019	26.6458	26.2499	NaN	26.0588	26.5045	NaN	NaN
	0.358688	0.0553939	Q8TBQ9	Protein kish-A	TMEM167A	2	2	25	8.0598	4.223	28.1115	28.1115	28.17	28.0711	28.2803	28.2077	27.6998	28.0084	27.9814	28.17	28.0711	28.2077
	0.103972	0.0554187	Q9P258	Protein RCC2	RCC2	23	23	57.9	56.084	323.31	32.3463	31.9609	31.9916	32.4483	32.0184	31.9983	31.8004	31.5664	31.8347	31.995	31.7613	31.8385
	0.13094	0.0554784	P26640	Valine--tRNA ligase	VARS	43	43	51.7	140.47	210.21	31.4284	31.0927	31.1239	31.4967	31.1544	31.1604	32.1842	32.196	32.1453	32.3088	32.1453	32.0479
	0.936262	0.0556297	Q92499	ATP-dependent RNA helicase DDX1	DDX1	33	33	52.7	82.431	323.31	32.325	32.2647	32.2786	32.362	32.3033	32.3698	31.9916	31.9746	31.9224	32.1052	32.0927	31.9259
	0.0894684	0.0557117	O43169	Cytochrome b5 type B	CYB5B	5	5	53.4	16.332	65.387	29.9539	29.4174	29.393	29.7146	29.8157	29.4012	29.4433	29.8339	29.9539	29.4765	29.7389	30.0084
	0.477947	0.0558427	Q92769	Histone deacetylase 2	HDAC2	13	9	37.7	55.364	146.71	30.6629	30.5573	30.5389	30.7047	30.5933	30.6285	29.7849	29.7325	29.8726	29.8534	29.6355	29.7676
	0.230456	0.0559419	Q02241	Kinesin-like protein KIF23	KIF23	9	9	14.1	110.06	44.723	27.7064	27.7453	27.9484	27.7645	27.965	27.8385	NaN	NaN	NaN	NaN	NaN	NaN
	0.209129	0.0559775	Q969H8	Myeloid-derived growth factor	MYDGF	4	4	20.8	18.795	12.731	30.9117	30.8901	30.8974	30.94	31.1422	30.7849	31.1901	31.0673	31.0927	31.9814	31.5156	31.1783
	0.0666787	0.0560748	P28906	Hematopoietic progenitor cell antigen CD34	CD34	5	5	17.4	40.716	114.37	32.1842	32.0316	31.5014	32.3672	31.8385	31.6798	32.9028	32.6923	32.7252	32.9171	32.8328	32.8664
	0.289291	0.0561797	P31939	Bifunctional purine biosynthesis protein PURH;Phosphoribosylaminoimidazolecarboxamide formyltransferase;IMP cyclohydrolase	ATIC	34	34	75.5	64.615	254.62	31.8719	31.6839	31.717	31.9045	31.7211	31.8157	32.5226	32.4108	32.4134	32.5343	32.3356	32.3672
	0.0994311	0.0564353	P46926	Glucosamine-6-phosphate isomerase 1	GNPDA1	13	8	68.2	32.668	180.96	31.2869	31.0737	30.8081	31.362	31.13	30.846	31.0609	30.7771	30.7373	31.1422	31.0084	30.7613
	0.367976	0.0565077	P62847	40S ribosomal protein S24	RPS24	6	6	36.1	15.423	23.137	31.2193	31.1783	31.1239	31.1724	31.3463	31.1724	30.7292	30.6458	31.1544	30.393	30.7613	31.0927
	0.178379	0.0568835	Q15785	Mitochondrial import receptor subunit TOM34	TOMM34	15	15	62.1	34.559	131.09	29.588	29.5128	29.459	29.8019	29.4214	29.5071	29.5333	29.3066	29.258	29.8065	28.94	29.2781
	0.217495	0.0571136	Q16531	DNA damage-binding protein 1	DDB1	35	35	39.6	126.97	293.28	32.8234	32.5664	32.6372	32.8664	32.648	32.6839	32.8403	32.9312	32.5956	32.8023	32.9117	32.8516
	0.247771	0.0571524	Q96FJ2	Dynein light chain 2, cytoplasmic	DYNLL2	6	3	64	10.35	63.841	31.0864	31.325	31.0609	31.2814	31.1604	31.2019	31.0349	30.9814	31.0737	30.9045	30.8004	30.8974
	0.118683	0.0574284	P49356	Protein farnesyltransferase subunit beta	FNTB	4	4	17.2	48.773	20.201	27.0296	26.6458	26.5725	26.8623	26.9539	26.604	NaN	NaN	26.9428	26.965	NaN	26.8858
	0.228151	0.0575523	P49756	RNA-binding protein 25	RBM25	13	13	20.8	100.18	119.34	29.9259	29.9814	30.1842	30.0217	30.0349	30.2077	29.5573	29.6198	29.668	30.2193	29.7645	29.8279
	0.0995267	0.0575848	P61968	LIM domain transcription factor LMO4	LMO4	2	2	23	17.994	35.454	25.5492	25.4614	25.4551	25.2481	25.9398	25.4506	NaN	NaN	NaN	NaN	NaN	NaN
	0.305968	0.0577469	Q9NWV4	UPF0587 protein C1orf123	C1orf123	6	6	54.4	18.048	175.74	28.7771	28.6865	28.524	28.7325	28.7486	28.6798	29.2262	29.4957	29.158	29.2692	29.4842	29.389
	0.117978	0.058047	Q14165	Malectin	MLEC	10	10	42.8	32.233	323.31	30.1604	29.5573	29.94	29.9117	29.9117	30.0084	30.2308	30.6022	30.4727	31.2077	30.9188	30.7927
	0.0620036	0.0581017	Q9Y4X5	E3 ubiquitin-protein ligase ARIH1	ARIH1	11	11	31.6	64.117	172.46	28.5463	29.4314	28.9484	28.6629	29.3536	29.0839	26.4154	26.2926	27.1015	NaN	26.067	26.8019
	0.0719664	0.0581551	Q86YQ8	Copine-8	CPNE8	9	8	25.2	63.107	44.056	27.4394	27.17	26.8264	27.3828	27.4629	26.7645	28.1459	28.0914	27.7389	28.3704	27.9316	27.4551
	0.0879386	0.0581697	Q5R372	Rab GTPase-activating protein 1-like	RABGAP1L	3	3	7.4	92.512	8.1341	25.895	25.1724	25.7619	25.5812	25.8215	25.6012	25.6757	25.6784	25.4457	NaN	NaN	NaN
	0.398867	0.0583642	O43264	Centromere/kinetochore protein zw10 homolog	ZW10	16	16	32.7	88.828	62.126	28.066	28.2759	28.1842	28.2535	28.2353	28.2123	27.8564	28.1604	28.019	27.8385	27.8741	27.9031
	0.125147	0.0585505	Q9Y4A5	Transformation/transcription domain-associated protein	TRRAP	16	16	6.7	437.6	70.251	27.0296	26.6458	26.5075	26.8504	26.6458	26.8623	27.2077	27.0711	27.3828	27.3239	27.3745	27.0711
	0.216559	0.0586694	O14981	TATA-binding protein-associated factor 172	BTAF1	19	19	17.6	206.89	82.685	27.8019	27.9869	28.0084	27.8974	27.9203	28.1556	27.8203	27.7064	27.5826	NaN	27.0711	27.4938
	0.1548	0.0587997	P08240	Signal recognition particle receptor subunit alpha	SRPR	21	21	44.8	69.81	131.55	29.9117	29.4862	29.766	29.9117	29.7421	29.6865	29.5315	29.6337	29.5296	29.6998	29.4154	29.49
	0.250559	0.0591125	Q99685	Monoglyceride lipase	MGLL	8	8	35.3	33.261	23.428	28.5536	28.3662	28.6075	28.6831	28.5278	28.4938	27.5315	27.391	27.6798	NaN	NaN	27.6595
	0.0889794	0.059262	Q8N573	Oxidation resistance protein 1	OXR1	11	11	22.9	97.969	153.02	27.3745	27.6998	27.7771	27.3066	28.003	27.7195	27.9705	27.5682	27.9316	28.4433	28.1459	28.0243
	0.112998	0.0595074	Q13868	Exosome complex component RRP4	EXOSC2	6	6	33.8	32.789	26.096	27.4314	26.9977	26.8264	27.2714	27.0711	27.0914	27.4394	NaN	NaN	NaN	27.2353	27.3239
	0.0461519	0.0595182	Q99715	Collagen alpha-1(XII) chain	COL12A1	69	69	33.3	333.14	323.31	31.2591	31.8534	31.1604	30.7771	32.099	31.5754	31.0414	31.1724	30.5754	31.7573	31.5014	31.0084
	0.26076	0.0595404	Q99729	Heterogeneous nuclear ribonucleoprotein A/B	HNRNPAB	9	9	21.1	36.224	38.934	31.3142	31.3568	31.2979	31.5014	31.4384	31.2077	31.0084	30.9117	31.2135	31.0864	31.2814	31.2479
	0.169483	0.0598189	Q9UNH7	Sorting nexin-6;Sorting nexin-6, N-terminally processed	SNX6	18	18	44.6	46.648	195.36	28.9287	28.9595	29.2007	28.8858	29.196	29.1866	28.5573	28.3066	28.5609	27.8203	27.9259	28.4629
	0.103785	0.0598761	Q9UPN6	Protein SCAF8	SCAF8	7	5	9.4	140.52	10.214	26.5285	27.0084	27.0084	27.1115	26.6595	26.9539	NaN	NaN	26.5711	NaN	NaN	NaN
	0.0835598	0.0603078	P53396	ATP-citrate synthase	ACLY	39	39	47.7	120.84	173.12	32.4284	31.9365	31.8974	32.5132	32.0544	31.8755	32.3436	32.1453	32.1177	32.005	32.0316	32.0641
	0.0449343	0.0605253	Q9BQ69	O-acetyl-ADP-ribose deacetylase MACROD1	MACROD1	4	4	22.8	35.505	9.4915	27.019	26.0148	26.8801	27.2803	26.1155	26.6998	26.9316	27.189	26.515	NaN	NaN	27.3494
	0.252321	0.0605621	Q13523	Serine/threonine-protein kinase PRP4 homolog	PRPF4B	10	10	10.4	116.99	22.029	27.5754	27.4938	27.4938	27.4394	27.5536	27.7517	28.1015	28.1604	27.9923	28.3992	27.9977	28.0453
	0.145238	0.0606531	O95470	Sphingosine-1-phosphate lyase 1	SGPL1	13	13	32.4	63.523	41.242	29.6964	29.249	29.5826	29.4512	29.5426	29.7162	29.524	29.995	29.9259	30.2308	30.1842	30.0864
	0.22464	0.0607357	P54920	Alpha-soluble NSF attachment protein	NAPA	8	6	43.4	33.232	37.953	28.7581	28.9117	28.6629	28.7389	28.9896	28.7864	28.6527	28.6458	28.7771	28.3367	28.7195	28.4785
	0.352138	0.0608107	Q8N163	Cell cycle and apoptosis regulator protein 2	CCAR2	26	26	45.2	102.9	205.51	30.6964	30.5664	30.6198	30.7453	30.5664	30.7533	30.4629	30.5296	30.4134	30.8081	30.7292	30.8682
	0.245933	0.0609245	Q8IU81	Interferon regulatory factor 2-binding protein 1	IRF2BP1	16	16	50.9	61.687	56.855	29.141	29.267	29.1115	29.0864	29.2331	29.3828	28.066	28.189	28.3109	NaN	NaN	28.249
	0.0995557	0.0613352	Q8WZA0	Protein LZIC	LZIC	7	7	48.4	21.494	19.571	28.203	28.1507	27.9316	28.1115	28.5315	27.8264	27.5315	27.8142	27.7708	28.258	28.362	27.7195
	0.14489	0.0614319	Q9NY12	H/ACA ribonucleoprotein complex subunit 1	GAR1	5	5	28.1	22.348	64.206	29.3869	28.8858	29.1842	29.2647	29.2825	29.094	29.158	29.2869	29.2602	29.4746	29.5184	29.7613
	0.198176	0.0616792	Q9NZ32	Actin-related protein 10	ACTR10	11	11	41	46.306	54.941	27.6251	27.8019	27.6458	27.8142	27.8974	27.5463	27.9869	27.7195	27.524	27.673	27.4473	27.509
	0.0713609	0.0618102	P35610	Sterol O-acyltransferase 1	SOAT1	4	4	7.8	64.734	62.238	27.4473	26.6145	27.5609	27.1604	27.3153	27.3324	NaN	27.0813	27.5969	NaN	NaN	27.1214
	0.195073	0.0618108	P12235	ADP/ATP translocase 1	SLC25A4	16	5	53.7	33.064	7.3676	27.9484	27.9539	28.1214	28.2847	27.9539	27.9705	27.6389	NaN	27.6595	NaN	28.2625	28.0914
	0.125773	0.0618178	Q9ULA0	Aspartyl aminopeptidase	DNPEP	11	11	32.6	52.428	49.658	28.8203	28.2979	28.5862	28.8081	28.4707	28.611	28.9814	28.8741	28.524	29.6233	29.2913	28.9512
	0.38188	0.0620003	O60763	General vesicular transport factor p115	USO1	33	33	47.9	107.89	218.59	31.2422	31.4284	31.2135	31.362	31.3356	31.3724	32.0832	32.0641	31.7888	32.2675	32.025	31.6415
	0.11285	0.062329	Q9NZL9	Methionine adenosyltransferase 2 subunit beta	MAT2B	11	11	46.4	37.551	27.483	28.8355	28.5426	28.3536	28.8974	28.6181	28.4032	28.8019	28.9484	28.7486	28.4938	28.8142	28.9316
	0.458421	0.0624243	O94906	Pre-mRNA-processing factor 6	PRPF6	24	24	29.4	106.92	102.4	30.0084	30.0217	30.0349	30.1361	29.9677	30.1483	28.9787	29.0839	29.0137	28.7031	29.158	29.3023
	0.0800446	0.062446	Q9H6R4	Nucleolar protein 6	NOL6	15	15	23.2	127.59	27.169	28.249	27.4938	27.5609	28.0557	27.5969	27.8385	27.6931	27.6527	27.8324	28.066	27.8081	28.066
	0.270827	0.0628128	P40938	Replication factor C subunit 3	RFC3	14	14	54.8	40.556	55.526	29.341	29.1866	29.2147	29.3971	29.1507	29.3828	29.4374	29.3828	29.5203	29.673	29.5772	29.3641
	0.0446909	0.0628694	Q9Y316	Protein MEMO1	MEMO1	10	10	61.6	33.733	56.734	29.7421	28.906	30.0609	29.509	29.1239	30.2647	28.8534	27.9088	26.1852	26.4831	27.9031	28.3662
	0.0533904	0.0629883	P02461	Collagen alpha-1(III) chain	COL3A1	74	56	67.9	138.56	323.31	34.1068	34.8746	34.7504	33.9933	35.0713	34.8562	36.5412	36.5556	36.2584	37.3486	37.0471	36.4853
	0.0957584	0.0635141	P04632	Calpain small subunit 1	CAPNS1	9	9	66.4	28.315	134.5	28.8504	29.3131	29.3174	28.8653	29.4214	29.3848	28.673	28.7031	28.6629	29.0349	28.8173	28.7864
	0.224449	0.0637906	Q9NX46	Poly(ADP-ribose) glycohydrolase ARH3	ADPRHL2	9	9	41.3	38.946	62.443	27.8324	27.8385	28.1556	28.066	27.9869	27.965	28.6075	28.611	28.2625	28.7833	28.5278	28.6285
	0.946516	0.063942	P23246	Splicing factor, proline- and glutamine-rich	SFPQ	29	28	44.8	76.149	323.31	33.7047	33.715	33.6629	33.7946	33.7047	33.7751	33.1254	33.0625	33.2478	33.4458	33.212	33.3568
	0.445711	0.0644836	P50570	Dynamin-2	DNM2	20	15	30.8	98.063	81.277	29.57	29.5555	29.6251	29.7645	29.5808	29.5987	29.4234	29.4668	29.3367	28.8355	29.3153	29.1532
	0.0775657	0.0645549	Q8IY18	Structural maintenance of chromosomes protein 5	SMC5	6	6	7.4	128.81	6.3283	26.1273	25.6237	25.9088	26.0975	25.4563	26.2997	NaN	NaN	NaN	NaN	NaN	NaN
	0.267465	0.0647176	P29401	Transketolase	TKT	31	31	68.2	67.877	323.31	33.8328	33.6629	33.6522	33.933	33.7252	33.6839	34.1223	34.0753	33.9242	34.4642	34.2193	34.0349
	0.110233	0.0647532	P49588	Alanine--tRNA ligase, cytoplasmic	AARS	42	42	61.9	106.81	323.31	33.7946	33.5641	33.3169	33.9153	33.5978	33.3568	34.13	34.1223	33.8422	34.3101	34.0017	33.715
	0.115635	0.0650883	Q96EY4	Translation machinery-associated protein 16	TMA16	5	5	37.4	23.864	18.161	27.4234	26.8019	27.341	27.2979	27.1312	27.3324	27.3662	27.2979	27.2891	NaN	27.17	27.391
	0.260521	0.065094	Q13618	Cullin-3	CUL3	22	22	32.7	88.929	272.71	29.7629	29.588	29.57	29.846	29.5754	29.6948	30.3088	30.2869	30.2077	30.7849	30.4823	30.362
	0.0942765	0.0653445	Q9Y6M1	Insulin-like growth factor 2 mRNA-binding protein 2	IGF2BP2	21	20	40.4	66.121	323.31	32.4823	32.2591	31.9435	32.6	32.341	31.94	32.333	32.3515	32.325	32.3672	32.3802	32.5085
	0.175552	0.0654589	Q9GZM5	Protein YIPF3;Protein YIPF3, 36 kDa form III	YIPF3	5	5	22.9	38.247	19.294	26.5433	26.4676	26.533	26.3014	26.7129	26.726	26.9428	26.3894	26.9869	26.632	NaN	NaN
	0.220159	0.06556	Q9HCC0	Methylcrotonoyl-CoA carboxylase beta chain, mitochondrial	MCCC2	14	14	31.4	61.332	118.85	29.1628	28.9595	28.9977	29.3001	28.9896	29.027	28.8711	28.8504	28.9316	29.0479	29.49	29.3303
	0.336914	0.065616	Q9UNW1	Multiple inositol polyphosphate phosphatase 1	MINPP1	7	7	20.5	55.051	44.402	27.4629	27.5682	27.7064	27.5682	27.6931	27.673	27.5463	27.3662	27.3494	28.1015	27.673	27.7453
	0.583676	0.0658188	P09651;Q32P51	Heterogeneous nuclear ribonucleoprotein A1;Heterogeneous nuclear ribonucleoprotein A1, N-terminally processed;Heterogeneous nuclear ribonucleoprotein A1-like 2	HNRNPA1;HNRNPA1L2	24	24	65.1	38.746	323.31	34.5412	34.4823	34.6143	34.6361	34.547	34.6522	34.2336	34.2048	34.2759	34.3436	34.0673	34.1901
	0.231124	0.0660254	P56182	Ribosomal RNA processing protein 1 homolog A	RRP1	4	4	11.3	52.839	71.561	27.4314	27.1214	27.391	27.4862	27.3578	27.2979	NaN	NaN	26.8019	NaN	26.8504	26.9539
	0.557797	0.0662676	P26368	Splicing factor U2AF 65 kDa subunit	U2AF2	11	11	35.6	53.5	63.181	31.6671	31.5618	31.6329	31.7211	31.6022	31.7373	31.2193	31.3828	31.4678	31.3828	31.5573	31.4967
	0.122559	0.066452	Q9BW19	Kinesin-like protein KIFC1	KIFC1	8	8	20.8	73.747	166.44	27.4707	27.1015	27.0813	27.5826	27.189	27.0813	27.5609	27.3745	27.7833	NaN	NaN	26.8264
	0.0964119	0.0664609	O15440	Multidrug resistance-associated protein 5	ABCC5	20	19	18.2	160.66	121.24	28.5862	28.8887	28.1937	28.6424	28.8593	28.3662	27.7129	27.4785	28.3196	28.1361	28.3578	28.2891
	0.234219	0.0665442	O43399	Tumor protein D54	TPD52L2	10	10	67	22.237	235.7	31.5343	31.7927	31.5435	31.5573	31.8081	31.7047	31.2422	31.1361	31.5527	31.2924	31.0017	31.0864
	0.157028	0.0667388	O15160	DNA-directed RNA polymerases I and III subunit RPAC1	POLR1C	6	6	29.2	39.249	18.01	27.2077	27.0084	27.2891	27.3494	27.391	26.965	27.3239	27.5609	27.3992	NaN	26.9203	27.341
	0.433559	0.0669092	Q9NUQ9	Protein FAM49B	FAM49B	10	8	47.5	36.748	117.78	29.9814	30.1239	29.9259	30.1239	30.0864	30.0217	29.8489	29.8799	29.4727	30.5296	30.0864	29.5682
	0.401345	0.0671094	Q9UPT8	Zinc finger CCCH domain-containing protein 4	ZC3H4	15	15	25.8	140.26	183.67	27.9372	28.0296	27.8019	27.9428	28.0296	27.9977	26.9203	NaN	27.8264	NaN	NaN	NaN
	0.198564	0.0672124	P09543	2,3-cyclic-nucleotide 3-phosphodiesterase	CNP	8	8	23.8	47.578	36.925	27.2714	27.604	27.1984	27.3578	27.4862	27.4314	27.7771	27.6458	27.5826	28.1015	27.8264	27.7325
	0.224879	0.0672728	P51970	NADH dehydrogenase [ubiquinone] 1 alpha subcomplex subunit 8	NDUFA8	7	7	46.5	20.105	20.093	29.3557	29.099	29.3303	29.4919	29.2147	29.2803	29.4881	29.57	29.651	30.0864	29.6355	29.6458
	0.210894	0.0673758	Q9NPF4	Probable tRNA N6-adenosine threonylcarbamoyltransferase	OSGEP	8	8	38.8	36.426	83.999	27.4629	27.17	27.4629	27.4073	27.3153	27.5754	26.965	NaN	NaN	NaN	26.965	27.0296
	0.498293	0.0675646	P19838	Nuclear factor NF-kappa-B p105 subunit;Nuclear factor NF-kappa-B p50 subunit	NFKB1	13	13	20.9	105.35	54.502	28.2308	28.2803	28.217	28.3704	28.1984	28.362	28.7988	28.7096	28.9002	28.8829	28.5426	28.5646
	0.0777557	0.0677344	P53701	Cytochrome c-type heme lyase	HCCS	9	9	44.8	30.601	51.262	28.9259	29.2262	29.7629	29.1239	29.2602	29.7341	28.7708	29.0084	28.906	29.1312	28.9977	29.0296
	0.284519	0.0677535	O60264	SWI/SNF-related matrix-associated actin-dependent regulator of chromatin subfamily A member 5	SMARCA5	43	30	45.1	121.9	323.31	31.3303	31.0927	31.1483	31.3515	31.1361	31.2869	31.13	31.2759	31.3356	31.6586	31.4532	31.4032
	0.110664	0.0678164	O75208	Ubiquinone biosynthesis protein COQ9, mitochondrial	COQ9	3	3	19.5	35.509	184.85	28.3992	27.9595	27.8858	28.3745	28.217	27.8564	28.4234	28.5609	28.5128	29.2285	29.0762	28.7581
	0.100383	0.0678787	Q9HBM1	Kinetochore protein Spc25	SPC25	3	3	17	26.152	6.0369	26.0854	25.4041	25.7103	25.8019	26.0464	25.5551	26.1234	25.8997	26.0609	NaN	NaN	NaN
	0.440577	0.0680879	Q9HB07	UPF0160 protein MYG1, mitochondrial	C12orf10	12	12	43.1	42.449	52.548	29.9677	29.8142	29.9259	30.0609	29.9539	29.8974	30.1115	30.1724	29.9259	30.6372	30.4532	30.1115
	1.18274	0.0683467	Q8WUM4	Programmed cell death 6-interacting protein	PDCD6IP	40	40	53	96.022	294.32	32.1513	32.1813	32.2193	32.2897	32.2365	32.2308	32.2507	32.2952	32.1513	32.5754	32.3303	32.1724
	0.586728	0.0684268	P45880	Voltage-dependent anion-selective channel protein 2	VDAC2	14	14	65	31.566	323.31	32.8829	32.7211	32.8608	32.8829	32.9135	32.8737	32.6923	32.947	32.781	33.2759	33.2178	33.1037
	0.325989	0.0684287	P61586	Transforming protein RhoA	RHOA	12	4	73.1	21.768	105.09	31.8937	32.0512	32.0117	32.005	32.196	31.9609	32.2279	32.2897	31.9435	32.2393	32.1453	32.0641
	0.186437	0.0685031	P31942	Heterogeneous nuclear ribonucleoprotein H3	HNRNPH3	12	11	57.2	36.926	102.18	31.2019	30.9609	30.9045	31.3033	30.9677	31.0017	30.8234	30.7613	30.8755	30.846	31.1544	31.13
	0.424174	0.0685552	Q9UBQ5	Eukaryotic translation initiation factor 3 subunit K	EIF3K	9	9	49.1	25.059	14.631	29.4194	29.5844	29.4113	29.5844	29.461	29.5754	29.5627	29.4995	29.2647	29.4649	29.7195	29.2692
	0.657638	0.0685724	Q16629	Serine/arginine-rich splicing factor 7	SRSF7	8	7	32.4	27.366	73.205	31.2077	31.0864	31.0927	31.2365	31.2077	31.1483	31.015	30.9882	31.0544	31.3515	31.2422	31.1483
	0.244285	0.068615	Q9NZM1	Myoferlin	MYOF	81	81	52.2	234.71	323.31	32.3802	32.5226	32.5435	32.3542	32.6415	32.6565	32.3196	32.3672	32.6964	32.7393	32.4408	32.7771
	0.192916	0.0686798	P42704	Leucine-rich PPR motif-containing protein, mitochondrial	LRPPRC	76	76	64.9	157.9	323.31	33.8516	33.5641	33.6307	33.9591	33.6198	33.6735	33.5527	33.7453	33.7653	34.1377	33.9591	34.0349
	0.353534	0.0687071	P28070	Proteasome subunit beta type-4	PSMB4	6	6	30.3	29.204	39.549	30.1361	30.1842	30.3515	30.2979	30.2077	30.3724	30.3724	30.196	29.7486	30.5014	30.4334	30.2422
[truncated: 1,132 more rows]

## Sheet: GIST-T1 >1UP S0=2
Combined Inhibition of AKT and KIT Restores Expression of Programmed Cell Death 4 (PDCD4) in Gastrointestinal Stromal Tumor
Marya Kozinova, Shalina Joshi, Shuai Ye, Martin G. Belinsky, Dinara Sharipova, Jeffrey M. Farma, Sanjay Reddy, Samuel Litwin, Karthik Devarajan, Alex Rosa Campos, Yi Yu, Brian Schwartz, Margaret von Mehren, and Lori Rink
Data file S2. Defining proteins abundance upregulated or downregulated amongst IM&MK-4440 treated and paired untreated in GIST cell line lysates identified using LC-MS/MS analysis
Table relates to the section Protein Extraction and LC-MS/MS Analysis.
GIST cell lines were treated for 20 hours with IM/MK-4440 combination at the following concentrations, 40nM/120nM (GIST-T), 1uM/3uM (GIST-T1/829) or corresponding amount of DMSO (control) in three biological replicates (R1, R2, R3).
Raw MS data was analyzed in MaxQuant and searched against the curated (Swiss-Prot) Homo sapiens Uniprot protein sequence database and GPM cRAP sequences (commonly known protein contaminants).
The MaxQuant output file was imported and susequently analyzed in Perseus
Label-free quantitation intensity (LFQ) values were log2 transformed, filtered in the following manner: proteins identified by site only were removed, potential contaminants were removed and filtered for proteins identified by >1 unique peptides, (NaN represents missing values).
LFQ data were annotated, filtered for valid values in 100% repeats at least at one of the experimental conditions, and subjected to a Student's T-test (S0=0.1, Permutation-based FDR <0.05, 250 randomizations)
Data File S2B: The differentially expressed proteins between IM&MK-4440 treated and paired untreated lysates in GIST-T1 cell line
Significant	"-LOG(P-value)"	Difference	Majority protein IDs	Protein names	Gene names	Peptides	Unique peptides	Sequence coverage [%]	Mol. weight [kDa]	Score	Log2(LFQ intensity)						Log2(LFQ intensity)
											GIST-T1-R1	GIST-T1-R2	GIST-T1-R3	GIST-T1-20h-IM/ARQ751-R1	GIST-T1-20h-IM/ARQ751-R2	GIST-T1-20h-IM/ARQ751-R2	GIST-T1/829-R1	GIST-T1/829-R2	GIST-T/829-R3	GIST-T1/829-20h-IM/ARQ751-R1	GIST-T1/829-20h-IM/ARQ751-R2	GIST-T1/829-20h-IM/ARQ751-R2
+	1.63642	-2.8436	P31350	Ribonucleoside-diphosphate reductase subunit M2	RRM2	21	18	59.6	44.877	113.94	31.0217	30.947	31.5618	26.8623	28.6764	29.461	31.4919	31.2077	31.0217	31.0609	30.4032	30.3088
+	0.897722	-2.84176	Q9C004	Protein sprouty homolog 4	SPRY4	8	8	36.5	32.541	79.91	30.1115	29.995	30.0217	28.1361	24.3087	29.158	30.2759	30.5933	30.4919	30.3088	30.3196	30.2869
+	1.01331	-2.78284	Q9UK76	Hematological and neurological expressed 1 protein;Hematological and neurological expressed 1 protein, N-terminally processed	HN1	6	6	69.5	16.014	39.854	29.3869	29.0296	29.3324	25.1982	25.1674	29.0349	30.7373	30.8682	30.8534	30.6285	30.4727	30.4334
+	2.19812	-2.75748	O14907	Tax1-binding protein 3	TAX1BP3	2	2	25	13.735	11.556	28.2445	28.1795	28.459	26.0153	26.096	24.4992	28.189	NaN	28.7771	NaN	28.217	28.5536
+	1.46892	-2.72603	Q7Z5L9	Interferon regulatory factor 2-binding protein 2	IRF2BP2	12	10	39.7	61.024	104.72	29.114	29.0003	29.2869	28.0505	26.0087	25.164	29.8638	29.3324	29.099	29.8974	29.5352	29.2913
+	1.47133	-2.70407	Q8NEY1	Neuron navigator 1	NAV1	23	23	21	202.47	155.25	29.6285	28.8324	29.6612	25.6556	26.0874	28.267	29.0762	29.114	29.0137	29.2625	28.3951	28.4394
+	2.30594	-2.69903	O75506	Heat shock factor-binding protein 1	HSBP1	5	5	81.6	8.5435	37.949	28.9705	29.0839	29.2602	27.0524	25.484	26.6811	29.4413	29.3196	29.141	29.1628	28.9705	28.8415
+	2.18572	-2.58955	P48634	Protein PRRC2A	PRRC2A	12	12	10.9	228.86	32.41	27.5682	28.2535	28.0401	24.5603	26.1358	25.397	28.2891	28.0864	28.17	28.3066	27.8445	27.9705
+	2.04524	-2.51094	P04818	Thymidylate synthase	TYMS	7	7	39.3	35.716	19.487	27.6931	27.604	28.0137	26.1369	24.3554	25.2857	28.9869	28.6561	28.7988	28.4394	28.0243	28.267
+	1.52785	-2.45248	Q9Y6A5	Transforming acidic coiled-coil-containing protein 3	TACC3	10	10	22.9	90.359	33.769	27.9146	27.524	28.1984	24.5275	24.9135	26.8385	28.0084	27.5389	27.3992	27.8799	27.4154	27.0711
+	2.42315	-2.37874	P11926	Ornithine decarboxylase	ODC1	7	7	21.3	51.148	48.766	28.4394	28.3992	28.6764	25.3587	26.5201	26.4999	27.6663	28.3023	28.3951	NaN	NaN	NaN
+	1.83863	-2.37309	Q13501	Sequestosome-1	SQSTM1	15	15	63.4	47.687	323.31	30.7533	30.7292	31.2479	27.5463	28.6216	29.4433	32.3879	32.5458	32.3672	31.7088	32.0084	31.5156
+	1.69461	-2.36797	O43402	ER membrane protein complex subunit 8	EMC8	4	4	25.7	23.773	8.878	27.8019	27.8203	27.8385	26.5764	24.3828	25.3975	27.9484	27.5826	27.7645	28.0084	NaN	27.8019
+	2.96491	-2.24637	P52732	Kinesin-like protein KIF11	KIF11	23	23	30.3	119.16	135.28	28.4234	28.5203	29.0137	26.2645	26.1642	26.7895	30.1842	29.9117	29.8726	30.1604	29.7113	30.0217
+	1.79826	-2.23535	Q9ULW0	Targeting protein for Xklp2	TPX2	17	17	28.5	85.652	272.83	26.8385	27.1214	28.604	25.2046	25.4851	25.1681	29.5052	29.3724	29.2054	29.6372	29.0427	29.2262
+	1.25558	-2.22854	Q9BX40	Protein LSM14 homolog B	LSM14B	6	6	35.1	42.07	234.05	28.2625	28.0813	28.6389	25.2693	25.2954	27.7325	28.6389	28.995	28.7581	28.1652	28.4194	28.3282
+	1.22524	-2.15348	P41743	Protein kinase C iota type	PRKCI	7	7	19.3	68.262	177.68	28.4234	28.4073	28.5203	25.2867	27.9316	25.6723	29.003	29.0505	28.8142	28.5682	28.726	28.5052
+	2.89521	-2.11211	Q9NSY1	BMP-2-inducible protein kinase	BMP2K	15	14	23.6	129.17	110.32	28.0711	27.9031	28.4433	26.316	26.1391	25.6261	27.9923	28.4629	28.459	27.5826	27.7581	27.7064
+	2.05689	-2.07902	Q13085	Acetyl-CoA carboxylase 1;Biotin carboxylase	ACACA	21	21	15.9	265.55	48.92	28.7162	28.3196	28.17	27.1015	26.1155	25.7517	28.7064	26.5638	NaN	29.066	25.3444	26.2571
+	0.908833	-2.07783	Q9UG63	ATP-binding cassette sub-family F member 2	ABCF2	17	17	29.5	71.289	53.591	29.8127	29.5296	30.1361	25.7394	28.2077	29.2979	30.2193	30.196	30.1604	29.5536	29.4938	29.3346
+	1.36221	-2.06443	P41567	Eukaryotic translation initiation factor 1	EIF1	8	3	76.1	12.732	44.064	29.6163	29.0243	29.726	26.6106	26.8303	28.7325	30.3515	30.4433	30.4032	30.0349	30.2422	29.94
+	1.1901	-2.03968	P46013	Antigen KI-67	MKI67	64	64	30	358.69	323.31	30.2979	29.2647	30.4823	26.7517	27.9595	29.2147	30.393	29.9259	30.8829	31.9259	31.3356	31.4284
+	1.39765	-2.02168	O43294	Transforming growth factor beta-1-induced transcript 1 protein	TGFB1I1	11	11	37.7	49.814	59.161	28.4823	27.4314	29.4551	26.8264	26.7129	25.7645	29.9677	30.4629	30.846	29.0762	29.7437	30.6964
+	2.08302	-2.01604	Q9Y4C2	TRPM8 channel-associated factor 1	TCAF1	12	12	17.3	102.12	26.42	28.4976	28.1842	28.965	26.1597	27.2262	26.2128	27.8324	28.189	28.003	NaN	NaN	NaN
+	0.974368	-1.9451	P35080	Profilin-2	PFN2	3	3	26.4	15.046	4.7247	26.6181	29.5352	29.0111	26.5156	25.957	26.8565	29.2123	29.2557	29.4032	29.2625	29.2054	29.4804
+	1.47201	-1.93314	P35555	Fibrillin-1	FBN1	44	42	24.5	312.24	276.99	29.0583	28.1556	27.6595	25.4769	26.632	26.965	29.2353	30.5573	30.5481	29.1459	30.8755	30.9746
+	1.97711	-1.93283	Q99442	Translocation protein SEC62	SEC62	4	4	7	45.861	3.9349	27.8019	28.0711	27.8504	26.77	25.8022	25.3528	27.8799	27.524	27.9316	27.524	27.7064	27.8264
+	2.06548	-1.92421	Q14534	Squalene monooxygenase	SQLE	11	11	28.9	63.922	56.837	27.341	27.7517	27.5754	26.2541	24.9364	25.705	28.6285	27.9031	28.1652	29.6848	29.4551	29.0788
+	2.2906	-1.88712	P55210	Caspase-7;Caspase-7 subunit p20;Caspase-7 subunit p11	CASP7	10	10	50.2	34.276	263.7	27.4073	27.0711	26.8385	25.2537	24.6883	25.7136	28.3239	28.2216	27.9259	28.4073	28.0401	27.7389
+	1.16574	-1.84465	P83916	Chromobox protein homolog 1	CBX1	7	6	57.3	21.418	107.19	28.2308	28.1459	28.3109	25.4454	25.8578	27.8504	28.267	28.2759	28.3282	28.5128	28.4314	28.3066
+	1.26223	-1.80373	Q7Z3E5	LisH domain-containing protein ARMC9	ARMC9	19	19	32.8	91.818	34.35	29.5682	28.9456	30.0864	27.1312	27.1604	28.8974	28.2891	27.4785	28.1937	28.249	28.1065	27.3992
+	2.65619	-1.79751	O75312	Zinc finger protein ZPR1	ZPR1	8	8	27.5	50.925	28.844	27.0914	27.1795	27.4314	25.9091	25.2003	25.2005	27.7129	28.1164	27.6527	27.3239	27.4629	27.5463
+	1.53889	-1.74948	Q9H0U3	Magnesium transporter protein 1	MAGT1	4	4	12.8	38.036	134.28	27.0914	27.1507	27.217	25.9376	25.9155	24.3577	27.0401	NaN	26.8264	26.9977	27.189	27.0813
+	1.50897	-1.72102	P52594	Arf-GAP domain and FG repeat-containing protein 1	AGFG1	6	6	18.9	58.259	200.41	28.2803	27.8974	28.3494	25.6712	26.2855	27.4073	28.7771	28.7549	28.4862	28.1459	28.4938	28.5609
+	2.25505	-1.6761	P52292	Importin subunit alpha-1	KPNA2	18	18	54.4	57.861	323.31	30.9609	30.8682	31.4919	29.2913	29.104	29.8974	32.8385	32.6881	32.5296	32.4895	32.3223	32.2164
+	1.81844	-1.65811	Q6PL18	ATPase family AAA domain-containing protein 2	ATAD2	20	17	21.9	158.55	37.881	28.2625	28.0084	28.9814	26.8947	26.2133	27.17	29.2147	29.4785	29.8519	28.9117	29.3196	29.9117
+	1.48308	-1.65355	Q7Z3T8	Zinc finger FYVE domain-containing protein 16	ZFYVE16	19	19	21.4	168.9	96.897	28.6931	28.7739	29.1913	26.6912	26.7895	28.217	28.5426	28.877	28.8711	28.391	28.2979	28.1604
+	2.85725	-1.64575	Q01581	Hydroxymethylglutaryl-CoA synthase, cytoplasmic	HMGCS1	17	16	47.1	57.293	74.724	27.7645	27.6181	27.5754	26.2256	26.1882	25.6068	29.5296	28.7031	28.4938	30.4629	29.4765	28.3578
+	2.04846	-1.57217	Q9BWU0	Kanadaptin	SLC4A1AP	14	14	37.1	88.813	138.88	28.019	27.2445	28.0401	25.7951	26.3494	26.4425	29.0401	29.3848	29.4154	28.7064	29.0914	29.2123
+	2.88393	-1.52037	O95864	Fatty acid desaturase 2	FADS2	7	7	20	52.259	15.866	27.5165	28.0401	27.4394	26.1384	26.1754	26.1211	29.995	29.0864	29.3023	29.995	29.4492	29.4804
+	2.48621	1.51923	Q96AQ6	Pre-B-cell leukemia transcription factor-interacting protein 1	PBXIP1	15	15	29.3	80.642	40.994	28.6146	28.203	28.6075	30.393	29.8112	29.7786	27.9595	NaN	27.3745	29.4394	28.611	28.4032
+	3.63877	1.55776	O43181	NADH dehydrogenase [ubiquinone] iron-sulfur protein 4, mitochondrial	NDUFS4	2	2	14.3	20.108	3.848	26.1787	25.9787	26.0131	27.8264	27.5389	27.4785	NaN	NaN	NaN	NaN	NaN	NaN
+	1.91119	1.6564	Q9NWU5	39S ribosomal protein L22, mitochondrial	MRPL22	4	4	25.7	23.64	8.046	26.1389	24.8574	25.7762	27.217	27.2445	27.2803	26.8974	NaN	26.425	26.8623	NaN	26.6998
+	1.28092	1.78307	O75531	Barrier-to-autointegration factor;Barrier-to-autointegration factor, N-terminally processed	BANF1	9	9	73	10.058	42.72	28.5278	30.4823	30.341	31.8534	31.2535	31.5933	30.6881	28.7389	31.1115	30.3724	30.3724	31.5109
+	1.17983	1.83054	Q92522	Histone H1x	H1FX	5	5	26.3	22.487	13.607	26.6635	25.5563	28.066	28.6764	28.6458	28.4551	27.9031	26.8741	27.9539	28.4394	28.1795	28.2077
+	3.60447	1.95439	Q9BUN8	Derlin-1	DERL1	2	2	7.6	28.8	4.957	25.7147	25.9208	25.7558	27.5754	27.6389	28.0401	NaN	27.5826	27.8504	NaN	27.4234	28.203
+	1.13411	2.08841	P62805	Histone H4	HIST1H4A	12	12	56.3	11.367	133.17	33.4943	36.4162	35.5209	37.3067	37.2637	37.1262	35.5032	33.8138	36.4581	35.3169	36.0059	36.5839
+	2.2525	2.09014	P28161	Glutathione S-transferase Mu 2	GSTM2	6	4	34.4	25.744	8.3689	26.2965	25.0112	25.4797	27.7517	27.7895	27.5165	27.9814	28.3494	28.673	27.6595	28.2625	28.6561
+	1.00222	2.48063	Q53EL6	Programmed cell death protein 4	PDCD4	13	13	42.2	51.735	85.124	28.632	28.4473	25.0739	29.7064	29.8279	30.0609	28.4629	NaN	NaN	30.3303	29.766	29.995
+	1.19393	3.01158	P30049	ATP synthase subunit delta, mitochondrial	ATP5D	2	2	13.7	17.49	2.5184	25.4564	24.7052	28.5609	29.4804	29.158	29.1189	NaN	NaN	NaN	28.611	28.0914	28.3066
+	5.09386	3.12901	Q9BVC6	Transmembrane protein 109	TMEM109	2	2	5.3	26.21	6.1039	25.847	25.6695	25.9517	28.8173	29.003	29.0349	29.094	28.341	28.5609	NaN	28.7389	28.7549
+	2.80479	3.56164	O00483	Cytochrome c oxidase subunit NDUFA4	NDUFA4	2	2	27.2	9.3697	5.4873	25.8853	24.6435	26.0131	28.7708	29.3174	29.1386	NaN	NaN	NaN	NaN	NaN	NaN
+	1.64197	4.87343	P16403	Histone H1.2	HIST1H1C	10	3	27.7	21.364	10.635	25.2003	28.7833	26.1506	32.7068	32.08	29.9677	30.6372	27.9814	29.7958	28.3704	28.5898	29.027
	0.671028	-1.95283	P42575	Caspase-2;Caspase-2 subunit p18;Caspase-2 subunit p13;Caspase-2 subunit p12	CASP2	12	12	39.6	50.685	39.299	29.2331	29.4919	29.5736	24.8601	28.5609	29.019	28.5969	28.2891	28.1652	28.4746	28.1604	27.7064
	0.528329	-1.9477	Q13509	Tubulin beta-3 chain	TUBB3	23	8	66.4	50.432	85.901	29.8974	29.7341	30.1604	24.7534	29.4214	29.7739	30.8755	30.8309	30.8309	30.6629	30.6372	30.5573
	0.81882	-1.91067	Q96HC4	PDZ and LIM domain protein 5	PDLIM5	16	16	37.4	63.944	176.93	28.4234	28.6629	29.3787	26.0997	25.6545	28.9787	29.0479	29.5664	29.4214	28.5014	29.2602	29.0296
	0.669754	-1.89916	Q6PKG0	La-related protein 1	LARP1	23	23	36.4	123.51	144.9	29.6181	29.4995	29.6337	25.1132	28.9923	28.9484	30.0864	29.8887	29.5352	29.7849	29.5147	29.2422
	0.721672	-1.85049	Q9UJY4	ADP-ribosylation factor-binding protein GGA2	GGA2	5	5	18.9	67.15	16.331	28.2714	27.7581	28.1842	25.3887	24.757	28.5165	27.673	27.9814	NaN	28.0864	28.0349	NaN
	0.981764	-1.84267	O95197	Reticulon-3	RTN3	2	2	4.8	112.61	78.821	30.196	29.8264	29.94	26.5376	28.3578	29.5389	30.1239	29.6831	29.6128	29.8741	30.0084	30.1115
	0.711242	-1.83335	Q9UN37	Vacuolar protein sorting-associated protein 4A	VPS4A	12	9	30.2	48.897	19.822	29.1507	29.0164	29.326	28.362	24.9887	28.6424	29.588	29.1984	29.0453	29.4012	29.0296	28.9705
	1.02524	-1.77844	Q07157	Tight junction protein ZO-1	TJP1	11	11	11.4	195.46	75.68	27.9031	28.2077	28.0243	25.4498	25.4642	27.8858	27.5754	27.7195	27.8019	27.4938	27.4551	27.6181
	0.684851	-1.7764	P61956	Small ubiquitin-related modifier 2	SUMO2	3	3	33.7	10.871	5.134	29.6337	29.651	29.5591	29.003	25.4793	29.0322	30.341	30.3196	30.3088	30.6022	31.0084	30.3303
	0.692124	-1.74943	Q9H910	Hematological and neurological expressed 1-like protein	HN1L	6	6	51.6	20.063	15.107	29.7942	29.2445	29.8004	25.673	28.4354	29.4823	29.604	29.6814	29.57	29.5573	29.5736	29.4073
	0.5663	-1.74809	Q9Y2Z0	Suppressor of G2 allele of SKP1 homolog	SUGT1	13	13	43.6	41.024	36.255	29.9259	29.6407	29.9259	25.3521	29.2957	29.6005	30.0864	29.7292	29.5352	29.94	29.6544	29.4881
	0.948086	-1.69936	Q05209	Tyrosine-protein phosphatase non-receptor type 12	PTPN12	13	13	25.8	88.105	133.95	28.9677	28.6492	28.673	25.5764	27.1604	28.4551	29.1604	29.1507	28.9031	28.8682	29.099	28.5315
	1.18614	-1.6908	O14562	Ubiquitin domain-containing protein UBFD1	UBFD1	4	4	18.8	33.382	49.294	28.0401	28.1361	27.9031	25.8577	27.6527	25.4966	27.0914	27.7325	NaN	NaN	27.8445	27.5826
	1.09088	-1.68669	Q9Y5A9	YTH domain-containing family protein 2	YTHDF2	9	7	20	62.333	23.881	27.9428	28.3828	28.2759	27.0719	27.3745	25.0949	29.0003	28.805	28.8173	28.5718	28.579	28.217
	1.06219	-1.67977	Q15021	Condensin complex subunit 1	NCAPD2	23	23	24.2	157.18	165.83	28.8534	28.8829	29.1652	26.2355	26.9203	28.7064	29.6407	29.4134	29.189	29.4374	29.1676	29.4012
	0.683191	-1.67813	Q92974	Rho guanine nucleotide exchange factor 2	ARHGEF2	20	20	28.6	111.54	128.97	29.3848	29.6022	29.632	25.6355	28.8858	29.0634	30.2869	30.1483	29.995	29.7802	29.8309	29.4707
	1.08334	-1.66963	Q96T88	E3 ubiquitin-protein ligase UHRF1	UHRF1	19	19	32.4	89.813	235.86	27.6527	28.6285	28.8081	25.9813	26.1507	27.9484	29.9814	29.6181	29.9117	29.6285	29.4785	29.5844
	1.40887	-1.66705	Q8NI22	Multiple coagulation factor deficiency protein 2	MCFD2	2	2	35.6	16.39	73.655	27.141	26.8974	27.2445	25.7041	26.1956	24.3819	26.5374	NaN	NaN	NaN	NaN	NaN
	1.11139	-1.65633	P18583	Protein SON	SON	23	23	17.9	263.83	73.951	28.5826	28.6663	29.0737	26.417	26.4504	28.4862	29.7676	29.2216	29.6915	29.4668	29.4154	29.0634
	0.482612	-1.61053	Q9H444	Charged multivesicular body protein 4b	CHMP4B	7	7	47.3	24.95	38.695	29.6022	29.5481	29.509	25.0419	29.3745	29.4113	29.5844	29.4413	29.4532	29.4727	29.5352	29.3217
	0.55193	-1.5904	P61960	Ubiquitin-fold modifier 1	UFM1	4	4	68.2	9.1175	50.435	30.3088	29.9539	30.0349	25.9844	29.5071	30.0349	29.7146	NaN	29.2891	29.6022	29.1214	28.9146
	1.19641	-1.55951	Q14807	Kinesin-like protein KIF22	KIF22	11	11	25.4	73.261	15.655	27.3066	27.1984	27.7645	26.2639	24.7066	26.6204	28.3367	28.2891	28.2803	28.267	28.0711	28.1214
	1.3327	-1.55877	Q7Z7E8	Ubiquitin-conjugating enzyme E2 Q1	UBE2Q1	5	5	27.5	46.126	47.637	27.3153	27.5536	27.3153	24.8471	25.9478	26.7129	27.6389	27.7645	27.4785	27.391	27.4073	27.2625
	0.646553	-1.55416	P04792	Heat shock protein beta-1	HSPB1	6	6	54.6	22.782	100.11	29.6251	29.0137	30.1115	26.0041	28.6424	29.4413	NaN	NaN	27.673	NaN	NaN	NaN
	0.821936	-1.54652	P62310	U6 snRNA-associated Sm-like protein LSm3	LSM3	2	2	32.4	11.845	83.565	28.7421	28.9231	28.55	28.9031	26.1169	26.5556	28.4433	28.2759	NaN	28.7517	NaN	28.362
	0.77952	-1.54612	O14558	Heat shock protein beta-6	HSPB6	5	5	55	17.135	22.294	29.1337	28.5014	29.4629	25.7884	28.0084	28.6629	27.7895	28.632	28.3704	27.6251	28.4785	28.4512
	1.00492	-1.54086	Q9Y2D5	A-kinase anchor protein 2	AKAP2	7	7	16.1	94.659	187.63	28.1164	27.6798	28.4551	26.0255	25.7059	27.8974	27.4473	27.9203	27.9428	27.5754	27.8623	27.9031
	1.21358	-1.54084	Q9UQ35	Serine/arginine repetitive matrix protein 2	SRRM2	39	39	20.8	299.61	308.52	31.2479	30.6198	31.6501	29.1435	29.0889	30.6629	31.2479	31.2759	31.1239	30.8974	30.9188	30.9677
	1.41427	-1.54025	Q9Y6I3	Epsin-1	EPN1	11	10	29.7	60.293	86.803	28.6181	28.3745	28.8887	26.1173	27.5969	27.5463	29.0164	29.104	29.1913	28.906	29.1747	29.1724
	0.873263	-1.53792	O95425	Supervillin	SVIL	18	18	13.8	247.74	32.619	27.5754	27.2625	27.3494	24.631	27.3992	25.5434	NaN	NaN	NaN	NaN	NaN	NaN
	0.887293	-1.52604	Q86XZ4	Spermatogenesis-associated serine-rich protein 2	SPATS2	9	9	29	59.544	115	30.1483	29.8081	29.8309	26.8159	29.158	29.2353	29.9677	29.8974	29.8814	29.2007	29.4919	29.2422
	0.411412	-1.50075	P62899	60S ribosomal protein L31	RPL31	3	3	24.8	14.463	5.3592	30.6713	31.1664	31.0927	26.4033	30.7771	31.2479	31.3724	31.1115	31.4483	31.1783	31.2019	31.2703
	0.483671	-1.50039	P98179	RNA-binding protein 3	RBM3	6	6	56.7	17.17	30.179	29.6527	29.94	30.1239	25.8071	29.1214	30.2869	31.4727	31.8157	32.2135	30.9746	31.4083	32.0609
	1.37599	-1.49455	P52943	Cysteine-rich protein 2	CRIP2	5	5	49.5	22.492	73.417	31.6458	31.0864	32.0927	29.5352	29.8872	30.9188	31.9188	31.7211	31.7533	31.4384	31.6881	31.6198
	0.979306	-1.49037	P42771	Cyclin-dependent kinase inhibitor 2A	CDKN2A	8	8	69.9	16.532	43.689	30.3515	30.196	30.7047	27.5609	29.3683	29.8519	30.9117	30.7533	30.7692	30.4919	30.5203	30.3724
	0.684263	-1.48588	Q06481	Amyloid-like protein 2	APLP2	13	12	22.3	86.955	44.792	28.0557	27.7708	28.2123	26.6019	24.795	28.1842	27.6998	27.9539	27.9372	27.8564	28.9896	29.5463
	0.374379	-1.45296	O43809	Cleavage and polyadenylation specificity factor subunit 5	NUDT21	12	12	74.4	26.227	74.132	30.4629	30.5754	30.4629	25.7957	30.5933	30.7533	31.0864	30.5933	31.2422	31.08	30.6713	31.2647
	0.39608	-1.42888	O96000	NADH dehydrogenase [ubiquinone] 1 beta subcomplex subunit 10	NDUFB10	6	6	48.3	20.776	10.361	28.4668	28.6216	28.5315	28.5389	28.7292	24.0651	28.3153	28.2891	28.5352	28.6492	28.4862	28.7129
	1.63209	-1.42479	Q2NKX8	DNA excision repair protein ERCC-6-like	ERCC6L	18	18	22.2	141.1	68.456	27.8799	27.6527	28.217	26.3799	25.9254	27.17	28.4707	28.4154	28.6492	28.3066	28.2123	28.2803
	0.937433	-1.42445	Q8N0X7	Spartin	SPG20	10	10	24.3	72.832	39.62	28.4512	27.8858	28.7031	27.4073	27.7581	25.6013	28.8264	28.4823	28.0965	28.0914	28.2353	27.8019
	0.529459	-1.42308	Q9NX62	Inositol monophosphatase 3	IMPAD1	7	7	25.3	38.681	30.886	28.459	28.9146	28.5128	24.8568	28.341	28.4194	28.3494	28.6931	28.6492	28.141	28.5203	28.4551
	2.18998	-1.42257	O75381	Peroxisomal membrane protein PEX14	PEX14	4	4	26.3	41.236	22.707	26.9316	27.2714	26.6595	25.8228	25.6425	25.1295	NaN	NaN	NaN	NaN	NaN	NaN
	1.23247	-1.41749	P30279	G1/S-specific cyclin-D2	CCND2	6	5	31.1	33.067	18.65	27.17	27.2445	27.3578	26.2267	24.778	26.515	26.9977	27.9203	27.8799	NaN	26.6998	27.0401
	1.34391	-1.41649	O75534	Cold shock domain-containing protein E1	CSDE1	23	23	34.6	88.884	221.17	29.1866	29.1115	29.0711	26.726	28.2625	28.1312	29.9539	30.2979	30.1361	29.3807	29.7162	29.4274
	0.726335	-1.40867	O14737	Programmed cell death protein 5	PDCD5	7	7	56	14.285	60.881	29.4727	28.9814	29.2216	26.0762	28.8682	28.5052	30.4629	30.1239	29.6881	30.0349	29.7864	29.5627
	1.601	-1.40657	Q9Y520	Protein PRRC2C	PRRC2C	24	24	15.6	316.91	141.09	29.2647	28.7988	29.55	27.345	27.5898	28.459	30.0084	29.9814	29.7629	29.6527	29.6268	29.341
	0.343386	-1.40028	Q8NBX0	Saccharopine dehydrogenase-like oxidoreductase	SCCPDH	9	9	35.4	47.151	86.443	29.9814	30.099	29.9814	25.2447	30.2647	30.3515	30.2077	30.099	30.2759	30.5014	30.4032	30.5014
	3.11428	-1.39903	Q9ULT8	E3 ubiquitin-protein ligase HECTD1	HECTD1	28	28	19.5	289.38	144.09	29.1984	29.0609	29.4649	27.6595	27.976	27.8916	29.2647	29.158	29.217	28.1164	28.5128	28.3066
	0.435929	-1.39835	P49773	Histidine triad nucleotide-binding protein 1	HINT1	9	9	78.6	13.802	56.264	30.8004	30.4629	30.9188	26.6489	30.196	31.1422	31.7252	31.3196	31.2814	31.7211	31.2814	31.4032
	0.554177	-1.39374	Q99436	Proteasome subunit beta type-7	PSMB7	6	6	36.5	29.965	49.506	30.1115	30.0349	29.9259	26.4328	30.0349	29.4234	29.94	29.8112	30.099	29.9539	30.0864	29.9259
	0.876696	-1.39277	P82979	SAP domain-containing ribonucleoprotein	SARNP	8	8	39.5	23.671	50.836	29.1189	28.7988	29.3217	28.3494	26.241	28.4707	29.4995	29.0243	29.0531	29.4765	29.1189	29.0217
	0.825816	-1.39223	Q9BYJ9	YTH domain-containing family protein 1	YTHDF1	8	5	23.1	60.873	34.37	28.4234	28.2535	28.4354	25.4431	27.5165	27.976	29.3066	29.2399	29.1189	28.7549	28.7864	28.9259
	0.445987	-1.38813	O15173	Membrane-associated progesterone receptor component 2	PGRMC2	9	8	39.9	23.818	37.06	29.6663	30.0349	29.6285	25.7571	29.3473	30.0609	28.7739	28.7927	28.8142	29.3724	28.9677	29.0111
	0.96438	-1.38414	Q96EK5	KIF1-binding protein	KIAA1279	9	9	26.4	71.813	33.178	28.6697	28.4354	28.5315	25.853	28.0557	27.5754	29.2714	29.0914	29.0427	29.2825	29.1312	29.1337
	0.533598	-1.37066	Q9UKY7	Protein CDV3 homolog	CDV3	13	13	72.1	27.335	211.23	29.5951	29.1937	29.7064	25.8931	29.0788	29.4113	30.611	30.6881	30.846	30.2308	30.5296	30.2869
	1.34512	-1.36452	Q9H9E3	Conserved oligomeric Golgi complex subunit 4	COG4	9	9	16.7	89.082	16.336	27.8203	27.2803	27.8799	25.9351	25.7915	27.1604	NaN	27.1312	26.9316	NaN	NaN	26.5507
	1.2398	-1.35706	O75153	Clustered mitochondria protein homolog	CLUH	18	18	23.1	146.67	61.403	28.0296	27.9372	27.9428	27.5536	25.7873	26.4975	28.3578	28.5862	28.6285	27.9539	27.7833	27.7708
	0.7705	-1.3569	Q6NYC8	Phostensin	PPP1R18	10	10	28.7	67.942	92.273	28.7421	28.5426	29.3109	25.9937	27.9595	28.5718	28.7486	28.5718	28.4234	28.5165	27.976	28.1604
	0.581801	-1.35584	O75494	Serine/arginine-rich splicing factor 10	SRSF10	7	7	19.5	31.3	18.517	29.708	29.1747	29.5609	26.1085	28.7988	29.4688	29.7786	29.3088	29.8142	30.0737	29.459	29.747
	1.06653	-1.35255	Q9NUL3	Double-stranded RNA-binding protein Staufen homolog 2	STAU2	10	10	24.7	62.608	23.813	27.4785	27.5754	27.6595	25.939	25.3589	27.3578	27.3153	27.2353	27.4629	27.0813	27.1312	27.0505
	0.507171	-1.34677	Q9Y5K5	Ubiquitin carboxyl-terminal hydrolase isozyme L5	UCHL5	12	12	47.1	37.606	44.506	28.6964	28.5573	28.6697	24.9729	28.3787	28.5315	29.2285	28.9896	29.0531	29.1507	29.1724	29.0057
	1.45402	-1.3404	P49840	Glycogen synthase kinase-3 alpha	GSK3A	5	5	20.5	50.98	78.428	27.0401	27.2262	27.2445	25.3463	25.4702	26.673	26.9977	26.965	27.1795	27.0505	26.7895	NaN
	0.940895	-1.33164	Q8TC07	TBC1 domain family member 15	TBC1D15	5	5	9.8	79.49	27.368	27.4707	27.4234	27.3992	25.8753	25.0822	27.341	27.0505	27.0505	27.0296	27.3153	27.1984	27.4473
	0.725896	-1.32601	Q8WX93	Palladin	PALLD	15	15	22	150.56	108.56	28.0864	27.9146	29.3324	25.9653	26.9869	28.4032	28.2759	29.0084	28.9231	27.7195	28.3494	28.5128
	1.60765	-1.3239	Q13426	DNA repair protein XRCC4	XRCC4	8	8	28.9	38.286	18.587	27.5682	27.5682	27.6527	26.3402	26.8875	25.5897	27.4394	27.3066	27.524	NaN	27.7195	27.5609
	1.79573	-1.31704	P11166	Solute carrier family 2, facilitated glucose transporter member 1	SLC2A1	3	3	10	54.083	18.076	27.0084	27.0505	27.3324	25.56	25.4456	26.4346	27.0813	27.0914	26.6998	NaN	NaN	NaN
	0.550239	-1.31402	O14976	Cyclin-G-associated kinase	GAK	14	14	17.7	143.19	40.558	29.0557	28.6355	28.8415	25.4405	28.3951	28.7549	27.6663	27.8203	27.6931	27.6595	27.5463	27.5826
	1.69837	-1.30501	Q9Y6Y0	Influenza virus NS1A-binding protein	IVNS1ABP	6	6	15.6	71.729	67.734	27.341	27.4314	27.3992	26.732	25.9828	25.5417	27.8445	27.7645	27.189	27.2891	27.2891	27.3578
	0.491993	-1.30066	Q9P287	BRCA2 and CDKN1A-interacting protein	BCCIP	10	10	37.6	35.979	185.03	29.2913	29.3044	29.027	25.6095	29.0427	29.0686	30.099	29.8667	29.94	30.2535	29.8385	30.0864
	0.700432	-1.29955	O60488	Long-chain-fatty-acid--CoA ligase 4	ACSL4	9	8	20.3	79.187	29.757	27.2445	27.1795	26.5135	26.4442	26.5404	24.0543	27.1604	NaN	NaN	27.0711	NaN	NaN
	0.807878	-1.2977	Q9Y6B6	GTP-binding protein SAR1b	SAR1B	8	5	66.7	22.41	28.699	28.9977	29.0003	28.8019	26.2087	28.0084	28.6898	29.1747	29.267	29.0813	28.9732	29.3153	29.2262
	1.36392	-1.2975	Q9Y6W3	Calpain-7	CAPN7	5	5	10.5	92.651	13.076	27.6998	27.4154	27.7195	25.9234	25.8392	27.1795	NaN	NaN	26.5507	NaN	NaN	NaN
	0.505065	-1.29566	Q96PK6	RNA-binding protein 14	RBM14	15	15	31.2	69.491	73.665	29.5109	29.6981	29.8623	26.2653	30.0479	28.8711	30.5664	30.6198	30.4234	30.5933	29.8916	30.362
	0.855198	-1.29511	Q9BQE3	Tubulin alpha-1C chain	TUBA1C	31	3	81.7	49.895	92.729	29.4134	29.1263	29.5844	27.0296	27.8264	29.3828	29.4938	29.3807	29.141	29.1386	29.4214	29.2239
	0.822469	-1.28204	Q9UP95	Solute carrier family 12 member 4	SLC12A4	19	17	21.4	120.65	41.604	28.7676	28.3787	28.9316	26.0045	28.0813	28.1459	26.9869	27.9539	27.8916	27.3745	27.9869	27.6931
	0.747579	-1.28135	Q53EP0	Fibronectin type III domain-containing protein 3B	FNDC3B	17	17	23.8	132.89	91.564	27.8741	28.6146	29.0737	25.9527	27.3828	28.3828	29.5426	29.7958	30.1483	28.4823	29.2979	29.2913
	0.710116	-1.2812	P04049	RAF proto-oncogene serine/threonine-protein kinase	RAF1	7	5	19	73.051	31.451	27.5315	27.3494	27.9259	26.5138	24.8384	27.611	27.3153	NaN	27.1795	NaN	NaN	NaN
[truncated: 2,707 more rows]
